# Supplementary material for: State-dependent activity dynamics of hypothalamic stress effector neurons
Source: eLife. 2022 Jun 30;11:e76832. doi: 10.7554/eLife.76832 (PMC9278954; doi:10.7554/eLife.76832)
Supplement: Figure 1—source data 1. [file elife-76832-fig1-data1.xlsx]

## Sheet: Figure 1C 1E
Figure 1C - Representative Light Response 5 ms					Figure 1E - Representative Light Response 50 ms
5 ms Pulse					50 ms Pulse
Raster		Histogram			Raster		Histogram
Time (s)	Trial	Time (ms)	#		Time (s)	Trial	Time (ms)	#
0.00410806	1	-17.5	1		0.00352186	1	-17.5	0
0.00779447	1	-12.5	1		0.0122054	1	-12.5	0
0.0255712	1	-7.5	2		0.0164653	1	-7.5	3
0.0340909	1	-2.5	1		0.0230189	1	-2.5	0
0.0439622	1	2.5	11		0.0391572	1	2.5	14
-0.00756832	2	7.5	17		0.00449215	2	7.5	29
0.00402339	2	12.5	12		0.00887489	2	12.5	22
0.00738211	2	17.5	5		0.0122746	2	17.5	15
0.0139357	2	22.5	4		0.00603589	3	22.5	14
-0.0185074	3	27.5	4		0.0107463	3	27.5	8
0.00414351	3	32.5	1		0.0150881	3	32.5	8
0.00844432	3	37.5	0		0.019225	3	37.5	4
0.0222069	3	42.5	2		0.00647369	4	42.5	3
0.0639862	3	47.5	0		0.00962762	4	47.5	2
0.0660342	3	52.5	2		0.0115527	4	52.5	1
0.078568	3	57.5	2		0.0188027	4	57.5	0
0.0861456	3	62.5	2		0.0225301	4	62.5	0
0.00558436	4	67.5	2		0.0265441	4	67.5	0
0.0103357	4	72.5	0		0.00715726	5	72.5	0
0.0221322	4	77.5	1		0.011499	5	77.5	0
0.0987686	4	82.5	1		0.0151035	5	82.5	0
-0.00753933	6	87.5	1		0.02178	5	87.5	0
0.0043391	6	92.5	1		0.0291938	5	92.5	0
0.012695	6	97.5	2		0.03415	5	97.5	0
0.0265804	6				-0.00641328	6
0.00338426	7				0.0040725	6
0.0420096	7				0.00755411	6
0.0664219	7				0.0112815	6
0.00361727	8				0.0151727	6
0.00767232	8				0.0196373	6
0.0546536	8				0.00600295	7
0.0102401	9				0.0105905	7
-0.0148403	10				0.014195	7
0.0523215	11				0.0181681	7
0.00401682	12				0.0222232	7
0.00991507	12				0.0261144	7
0.00391472	15				0.0310296	7
0.00858417	15				0.0415563	7
-0.00244685	16				0.00513004	8
0.00418869	16				0.00963565	8
0.00783414	16				0.0133221	8
0.0612871	16				0.0170494	8
0.0126137	17				0.0376524	8
0.0114131	18				0.00409328	9
0.0160007	18				0.00950002	9
0.0581486	18				0.0319462	9
0.0915311	18				0.00240117	10
0.00611652	19				0.0071935	10
0.0101306	19				0.0146482	10
0.0143495	19				0.0235366	10
0.00620376	20				0.00369914	11
0.0558884	20				0.00775419	11
0.00406108	21				0.0112768	11
0.0087715	21				0.00471039	12
0.00626018	22				0.00958464	12
0.00892258	22				0.0129843	12
0.0114621	22				0.0171623	12
0.0145341	22				-0.00828672	13
0.0227671	22				0.00432899	13
0.00665703	23				0.00695044	13
0.00968807	23				0.00321032	14
0.0123914	23				0.00755209	14
0.0154634	23				0.0244277	14
0.0196004	23				0.00387101	15
0.0259492	23				0.00800798	15
0.0849727	23				0.0112029	15
0.00951148	24				0.0148483	15
0.0147544	24				0.00541474	16
0.0180721	24				0.00959267	16
0.022291	24				0.0130743	16
0.0281893	24				0.016392	16
0.096224	24				0.0206519	16
0.00286319	25				0.00605735	17
0.0065496	25				0.0212126	17
0.0151103	25				0.045461	17
					-0.00816856	18
					0.00264491	18
					0.00604459	18
					0.00928044	18
					0.0217733	18
					0.00681008	19
					0.0118072	19
					0.0195077	19
					0.0241362	19
					0.0349087	19
					0.0406431	19
					0.0451897	19
					0.0103609	20
					0.014334	20
					0.0220345	20
					0.0259667	20
					0.0305132	20
					0.0347731	20
					0.00498233	21
					0.00981563	21
					0.0230457	21
					0.0274285	21
					0.0318931	21
					0.0429524	21
					0.00521534	22
					0.00980287	22
					0.0134893	22
					0.0251629	22
					0.0357716	22
					0.00538451	23
					0.00993108	23
					0.0130031	23
					0.0170581	23
					0.0217276	23
					0.0268066	23
					0.0317628	23
					0.0381936	23
					0.00422487	24
					0.00881241	24
					0.0122531	24
					0.0160214	24
					0.0207318	24
					0.00298332	25
					0.00765277	25
					0.0112573	25
					0.0153123	25
					0.0297303	25
					0.0545521	25

## Sheet: Fig1D 1F
Figure 1D - Light Response				Figure 1F - Light Response - Firing Rate Time Course (spikes/s)
	Event Probabiliy				5 ms Light Pulse
Unit	BL	Light		Time (ms)	Unit2	Unit3	Unit6	Unit8	Unit12	Unit13	Unit16	Unit18	Unit20	Unit24	Unit25	Unit27	Unit29	Unit30	Unit32	Unit33	Unit35	Unit36	Mean	SD
Unit1	0.08	0		-20	4	0	4	12	8	0	4	0	0	8	0	0	4	4	0	9.09091	8	8	4.061	3.955
Unit2	0.16	0.56		-10	8	4	0	8	8	4	8	0	0	0	0	8	4	0	0	9.09091	0	4	3.616	3.688
Unit3	0.08	0.56		0	8	4	12	4	12	0	0	0	4	4	0	12	4	0	0	6.06061	0	0	3.892	4.472
Unit4	0.04	0		10	56	52	52	64	112	128	144	92	20	32	124	112	84	16	32	78.7879	20	32	69.49	41.42
Unit5	0.08	0.04		20	8	12	12	20	44	88	24	12	20	28	64	68	64	44	0	9.09091	72	0	32.73	27.73
Unit6	0.12	0.52		30	12	4	0	8	20	28	4	8	36	0	16	32	8	8	0	0	36	0	12.22	12.83
Unit7	0.08	0		40	20	0	0	0	4	0	4	4	8	4	4	4	12	8	0	0	0	0	4	5.314
Unit8	0.12	0.6		50	4	0	4	0	16	4	0	4	12	4	0	8	0	4	0	0	0	0	3.333	4.602
Unit9	0	0		60	4	0	0	0	8	0	4	4	4	0	0	16	4	0	0	0	0	0	2.444	4.148
Unit10	0.08	0.04		70	0	0	0	12	4	12	8	0	4	0	4	16	0	16	0	3.0303	0	4	4.613	5.71
Unit11	0.04	0		80	0	0	0	4	4	0	0	0	16	0	0	4	0	0	0	3.0303	0	0	1.724	3.908
Unit12	0.12	0.96		90	0	0	4	4	8	0	12	8	4	4	0	8	0	4	0	6.06061	0	0	3.448	3.748
Unit13	0.04	0.96		100	0	0	4	4	16	4	0	4	16	0	4	12	0	8	0	0	0	4	4.222	5.397
Unit14	0	0.08			50 ms Light Pulse
Unit15	0	0.04		Time (ms)	Unit2	Unit3	Unit6	Unit8	Unit12	Unit13	Unit16	Unit18	Unit20	Unit24	Unit25	Unit27	Unit29	Unit30	Unit32	Unit33	Unit35	Unit36	Mean	SD
Unit16	0.08	0.96		-20	4	8	0	4	0	8	8	4	0	8	0	0	0	4	0	12	0	0	3.333	3.941
Unit17	0.04	0		-10	4	0	0	8	8	4	8	0	4	0	4	0	0	8	0	12	0	0	3.333	3.941
Unit18	0	0.76		0	0	0	0	4	4	0	4	0	0	12	4	12	4	8	0	8	8	4	4	4.116
Unit19	0.04	0.04		10	40	28	64	172	124	48	184	88	44	56	224	172	84	72	44	132	8	44	90.44	62.56
Unit20	0.04	0.36		20	16	20	36	160	168	160	116	120	152	84	36	148	76	100	32	56	80	12	87.33	55.19
Unit21	0.04	0		30	16	12	32	120	140	108	28	148	112	44	0	88	36	96	40	56	12	44	62.89	47.36
Unit22	0.04	0		40	4	4	28	100	100	84	8	100	76	72	0	48	16	96	32	28	4	16	45.33	38.93
Unit23	0	0		50	8	0	20	76	76	32	12	96	52	40	0	20	4	60	32	32	4	12	32	29.2
Unit24	0.04	0.56		60	0	0	0	8	24	100	0	44	12	8	0	4	0	0	12	12	0	4	12.67	24.51
Unit25	0	0.92		70	0	0	0	0	12	4	0	0	16	0	0	0	0	4	0	0	0	0	2	4.602
Unit26	0	0.08		80	0	0	0	0	4	8	0	0	16	0	0	0	0	4	0	0	0	0	1.778	4.166
Unit27	0.2	0.8		90	0	0	0	0	0	0	12	0	8	0	0	0	0	0	0	4	0	0	1.333	3.361
Unit28	0	0.04		100	0	0	0	0	0	0	8	0	8	0	0	0	0	0	0	12	0	0	1.556	3.666
Unit29	0.08	0.8
Unit30	0	0.6
Unit31	0.04	0
Unit32	0	0.32
Unit33	0.152	0.727
Unit34	0	0
Unit35	0	0.64
Unit36	0.04	0.32
