# Supplementary material for: State-dependent activity dynamics of hypothalamic stress effector neurons
Source: eLife. 2022 Jun 30;11:e76832. doi: 10.7554/eLife.76832 (PMC9278954; doi:10.7554/eLife.76832)
Supplement: Figure 2—source data 1. [file elife-76832-fig2-data1.xlsx]

## Sheet: Fig 2 Supplement
Figure 2 - Figure Supplement 1 - Unit Baseline ISIs (ms)
Unit2	Unit3	Unit6	Unit8	Unit12	Unit13	Unit16	Unit18	Unit20	Unit24	Unit25	Unit27	Unit29	Unit30	Unit32	Unit33	Unit35	Unit36
1025.35	98.4271	446.383	34.857	8.23298	279.717	23.7569	425.289	16.3021	1231.42	1581.76	135.291	4.95617	57.0984	732.408	47.7595	1812.03	738.265
48.7835	80.5685	69.2226	253.133	27.6481	204.432	349.226	1958.75	1673.71	22.569	1097.2	187.802	5.07905	174.244	7943.52	7.24994	618.539	1146.43
193.782	317.768	838.658	879.045	1095.64	275.989	11.5098	34.2017	7.16802	1221.18	2130.21	235.684	6.18498	198.657	8102.48	324.855	5.28385	262.513
1071.56	576.677	4.17793	46.0801	6.38978	121.529	635.373	1109.12	1367.78	52.4289	1627.8	164.332	8.5197	330.671	6311.58	6.38978	564.307	4.13697
1832.8	9.42082	4.91521	95.2322	6.34882	53.9035	448.513	425.371	2325.51	422.585	328.459	161.219	8.1101	130.786	9857.83	12.4928	904.071	482.715
203.203	13.9264	1009.22	2504.71	15.6877	780.822	483.821	1297.53	7.00418	574.506	165.192	673.138	188.908	181.248	6489.8	46.244	6.8813	95.1913
798.845	19.2103	3.56353	931.842	45.3428	49.6436	524.248	2595.81	3.97313	361.432	142.009	3.72737	328.377	58.0405	91.9964	1776.44	432.948	15.8106
502.621	43.09	3.72737	45.7115	86.7125	133.325	987.958	5603.42	5.40673	1120.79	1460.23	3.35873	250.512	559.679	7960.92	4.83329	5.16097	9.5437
93.2252	70.82	4.75137	809.454	1565.9	225.731	6.18498	5517.41	1926.23	656.386	236.135	12.329	261.735	138.691	715.737	9.87139	1377.86	999.304
1450.19	70.861	11.264	613.05	91.5049	236.545	9.09314	8340.99	3.89121	1696.69	2151.51	125.42	770.582	222.782	99.2873	5.07905	493.528	466.29
459.859	593.061	439.215	2290.69	1297.33	260.342	405.054	998.157	3.76833	35.8401	751.167	305.644	452.445	168.96	14086.5	7.86434	4.79233	3.85025
200.336	630.376	20.521	985.377	433.194	153.928	157.696	7583.48	5.32481	801.548	1456.95	170.025	1633.24	103.711	1528.43	279.389	7.74146	5.81633
131.277	3.93217	20.6849	969.935	182.559	347.26	465.307	4913.7	564.348	344.843	8.27394	295.527	4.58753	28.2625	6928.12	1595.19	877.365	3191.86
1824.53	4.09601	174.736	1187.06	1439.01	62.5461	722.209	409.724	1873.97	899.689	2906.57	95.1913	4.99713	351.315	4333.46	7.24994	8.1101	1906.04
1285.66	5.03809	179.569	3449.95	7.65954	12.6157	365.651	945.072	5.57057	9.5437	239.658	613.214	5051.08	823.953	7241.01	261.53	1285.66	3.85025
3.56353	45.6705	1424.39	1381.71	120.832	343.45	11.1002	23986.5	4337.31	235.111	1949.66	304.006	184.566	799.214	433.931	521.34	1123.29	4.58753
3.93217	41.083	7.86434	543.459	144.63	766.445	32.6862	11784.5	6.02114	831.736	3089.33	99.0825	2.04801	471.492	10832.8	833.333	687.884	992.054
190.956	38.1339	646.064	1703.94	1106.25	271.279	27.3204	8159.95	3.68641	821.865	953.142	125.338	4.79233	557.508	11180.3	3.35873	13.394	4.13697
877.816	162.038	160.031	8.15106	2524.94	263.455	1775.46	3343.04	4.62849	524.658	1488.49	62.9966	4.58753	146.146	2411.57	199.23	873.843	6.18498
654.583	69.796	637.298	25.8868	8.3149	215.286	38.011	5933.64	170.845	33.9969	693.782	157.737	7.78242	56.8117	659.785	146.965	3.52257	1379.37
55.419	154.256	5.48865	532.522	5.16097	325.92	405.218	8225.49	3183.95	4133.12	24.2074	606.005	9.25698	352.871	2396.82	40.5505	3.80929	2.66241
116.818	123.74	5.20193	317.973	13.7626	172.565	36.8641	1655.32	5.77537	7.0861	783.976	107.275	178.013	155.034	14888.1	360.981	19.3332	3.48161
206.48	131.195	143.36	65.659	30.2286	365.569	389.49	1711.35	435.938	237.732	4384.53	111.862	161.874	24.9857	8599	166.831	934.382	10.1581
888.384	136.438	303.883	54.1083	81.0191	316.253	5.57057	2581.84	7.04514	984.763	665.479	815.516	1207.3	329.688	298.067	118.58	4.79233	498.976
3.60449	517.326	678.586	40.5505	127.181	608.749	123.781	2529.94	5.69345	14.5818	142.418	3.52257	12.7796	193.946	1425.08	1576.92	4.30081	415.704
3.48161	300.729	4.17793	1611.17	1212.21	249.406	11.9194	410.093	4.99713	153.6	5206.11	197.633	34.4884	659.007	6820.47	3.27681	1268.37	236.504
13.8445	419.022	6.10306	1179.49	31.3754	89.2111	755.837	5879.33	225.813	1695.09	1811.13	3.93217	46.6945	812.034	2659.05	219.915	6.92226	6.0621
2442.12	30.5562	583.722	69.7551	58.6139	28.3854	285.123	1748.3	5006.39	627.673	517.9	5.24289	98.0995	127.304	43.4177	322.52	18.8007	1227.82
6.96322	32.2356	29.6551	10.1991	894.569	9.1341	1226.3	2395.35	3.27681	3369.05	765.462	12.9024	651.552	182.559	1633.98	152.372	386.745	3.85025
33.5054	135.742	82.5756	2237.24	11.7965	76.4725	254.977	3269.07	7.00418	28.6311	1247.85	52.388	2130.25	260.138	31635.7	840.542	265.34	4.83329
37.6833	179.037	790.612	59.2283	302.367	37.9291	18.3911	3172.81	5.93922	57.3441	467.191	296.756	1117.51	130.827	16551.5	3.93217	257.229	405.3
272.794	370.116	129.966	57.8766	20.521	94.454	90.1532	187.802	449.087	1062.59	2289.71	7.61858	38.7892	91.4639	3170.15	4.17793	1912.67	4.38273
3237.4	226.755	35.7991	687.556	1834.64	372.86	1704.72	4774.97	1446.26	1962.32	107.643	9.78947	70.2466	634.8	4026.21	227.042	4.30081	1013.03
854.018	76.5135	495.863	1808.84	4.83329	244.491	1192.35	114.443	6.51266	875.236	1831.37	20.9716	123.331	586.18	6773.53	156.386	2023.72	294.79
6.63554	123.003	154.461	378.389	4.87425	427.869	6.79938	3436.06	4.50561	1057.59	5.44769	25.3133	122.389	229.909	3973.87	589.252	1379.9	144.302
9.37986	148.03	185.836	34.7751	14.2132	63.5701	1744.94	1231.59	16.5888	17.0804	243.836	36.6183	269.477	288.154	543.663	110.961	2066.48	75.4895
18.473	147.293	731.752	26.2145	193.496	101.622	18.3501	801.262	2447.12	821.373	907.43	1059.97	880.437	316.867	227.533	1255.06	5032.07	104.735
85.7295	248.218	6.30786	1016.92	99.1235	93.0204	66.0686	6553.29	3.60449	2667.4	748.341	3.39969	307.733	36.987	628.656	3.39969	2838.99	130.376
1228.19	156.017	5.69345	19.8247	1665.07	70.1237	134.431	414.189	3.60449	309.576	2667.36	3.27681	719.137	89.0473	13.353	3.48161	253.297	122.348
4.17793	116.531	6.79938	16.384	7.24994	20.9716	239.535	164.619	4.83329	228.844	1381.13	174.449	78.1519	280.126	11.5507	348.816	4139.51	947.817
4.46465	138.322	688.58	1257.48	12.329	18.8007	290.12	2199.8	19.9885	933.358	3696.08	4.21889	228.557	2094.62	5554.35	503.768	3.97313	1131.48
37.4785	134.841	5.81633	48.1691	315.147	8.80642	13.2301	140.288	14.8685	515.565	736.79	4.62849	639.469	181.617	826.821	620.914	4.05505	486.811
1176.42	207.012	5.52961	393.504	5.12001	97.6079	157.41	540.714	3348.94	881.912	4.50561	79.053	343.819	2462.73	4763.33	5.57057	10.1991	816.089
186.409	48.9064	25.682	11.0183	76.964	149.013	560.826	399.361	3.39969	1344.52	16.6298	141.681	365.815	38.4206	16619.5	40.5915	2693.91	3.64545
132.506	36.0859	539.649	1637.3	240.927	192.963	225.895	521.75	3.48161	10.8544	1845.58	98.55	499.549	363.521	638.937	4.91521	7.7005	327.763
1418.08	21.0945	172.196	26.0097	3124.07	134.841	481.486	83.2309	4.30081	1781.44	822.397	121.815	104.94	292.25	758.581	47.4728	36.2087	259.032
13.7216	56.8526	304.129	69.7141	9.42082	83.19	75.8172	2549.81	5.65249	511.059	112.19	62.0136	42.6395	131.769	6759.73	167.076	274.842	1239.66
113.132	49.7665	208.692	678.463	55.1733	53.0433	131.031	430.859	7.04514	36.0039	1233.64	75.3666	109.896	225.854	3710.49	183.583	80.6914	2.99009
814.287	10.1171	155.198	51.0773	1366.14	253.543	70.6152	609.2	11.5098	257.229	12.288	94.0854	144.999	397.354	2515.73	1276.56	138.896	276.563
38.6663	8.68354	170.681	1171.3	10.0762	278.406	101.212	1125.3	14.1312	2336.04	86.7945	107.397	72.7861	109.241	4112.85	4.99713	2114.24	447.243
46.4078	24.9037	268.084	189.645	36.8641	32.6452	652.822	542.148	2589.58	1616.57	1409.89	147.579	50.5857	683.87	3034.94	54.0673	229.622	435.529
2557.55	62.7099	390.35	324.568	185.263	358.77	1335.34	2393.09	3.19489	879.413	12.0423	89.7026	678.709	237.937	165.151	225.936	142.213	4.62849
857.049	53.9035	143.278	2.99009	1077.62	30.2286	597.854	156.304	3.07201	502.99	177.071	298.435	235.398	73.892	9422.5	248.382	1867	1417.92
296.183	62.2594	284.837	1272.92	1503.52	410.83	2699.11	2080.94	7.04514	1333.74	1156.3	207.053	264.07	724.666	14.8685	1631.65	1569.84	4.87425
1213.73	68.813	121.201	936.799	225.772	244.696	4237.73	2421.85	895.429	336.16	8.15106	157.164	677.03	111.002	3863.15	5.07905	4.30081	665.97
207.422	62.0136	110.879	894.733	163.267	687.106	5.44769	128.246	3.23585	31.785	38.1748	403.703	361.76	217.949	8679.36	400.426	5.77537	342.672
126.485	66.8469	488.49	1379	42.4347	97.526	1277.46	581.633	3.23585	1064.76	47.6366	217.744	1795.08	49.1931	6184.36	531.58	1249.08	4.66945
126.69	32.9729	138.036	117.556	125.133	345.171	5.12001	1940.69	3.89121	386.868	795.363	604.858	5.12001	215.983	16691	4.38273	3.72737	77.3327
780.741	86.9993	308.634	718.399	139.592	445.851	185.099	2263.25	5.57057	1322.32	701.647	35.5943	78.4796	1882.08	830.507	769.313	7.2909	341.689
589.334	50.9953	638.486	50.299	97.1164	41.4926	1600.97	7345.29	1340.17	28.4673	8.84738	146.596	41.8203	252.56	6300.97	3.97313	369.132	196.568
2271.81	74.1378	467.027	987.016	111.248	32.9729	217.744	3105.55	3.76833	1262.14	70.0008	328.91	120.955	825.346	5468.75	4.05505	492.218	32.5223
3.72737	184.894	7.45474	154.174	103.629	122.143	2412.14	10268.5	3.89121	3781.85	1765.22	357.09	615.262	135.824	10222.8	411.567	2337.35	23.5521
3.35873	108.38	313.263	146.637	64.3483	290.161	47.5547	11091.6	5.07905	7.20898	30.761	127.427	136.725	887.81	5.28385	4.91521	1259.73	12.4519
427.173	99.6559	31.9489	74.916	425.207	11.8784	319.243	2648.52	293.356	16.1792	333.251	477.595	182.887	614.238	73.5643	5.32481	330.425	67.8709
2836.04	168.838	53.6987	1392.68	649.668	18.7188	130.745	477.267	459.654	277.095	1172.03	270.541	409.15	961.784	61.645	8.68354	341.935	268.821
7.45474	108.217	43.2129	82.7394	739.535	247.563	20.1933	564.348	2008.64	1146.84	71.5983	520.234	1051.4	1196.77	17153.6	3.64545	428.402	1376.83
471.287	87.6956	646.064	101.13	5.73441	14.0903	15.8516	2257.15	3.39969	129.557	153.437	6.38978	12.5338	173.138	36.3316	272.712	603.383	3.31777
5.16097	422.176	5.48865	70.0418	506.021	169.247	681.167	1127.34	3.15393	3830.34	2582.37	5.20193	1308.68	67.4203	18.8826	1770.21	4.13697	4.30081
5.48865	222.454	27.9348	4.46465	30.3514	91.6687	129.352	1451.26	3.68641	3076.76	3.89121	14.7456	4.13697	4714.34	4018.23	3.64545	4.34177	343.532
40.3457	206.849	296.633	385.762	948.267	10.3629	31.0478	1521.5	3361.47	6.30786	669.943	29.0817	5.36577	80.9372	693.946	3.68641	109.404	315.434
857.336	119.194	71.3935	3.56353	11.4688	167.609	548.128	123.781	3.76833	108.831	1220.73	27.3614	119.644	3146.27	59.556	280.249	917.588	959.04
126.116	160.154	78.6434	6.8813	135.66	6.75842	11.6327	80.3228	4.17793	504.137	1849.72	51.0773	147.129	2573.07	2567.46	534.693	7.04514	2.62145
2179	1237.77	1133.82	743.467	290.489	6.59458	100.762	1157.04	3.97313	996.6	51.2411	62.0955	358.647	2122.59	1946.75	18.8007	23.9207	1211.31
7.41378	3.68641	18.1863	2.62145	1321.62	19.497	35.0209	1552.02	4.58753	26.2554	211.764	64.8808	225.813	119.112	4664.13	4.38273	903.17	816.581
1004.01	3.68641	295.732	157.614	8.47874	21.6679	674.736	1437.17	14.7456	219.587	1375.03	491.685	540.182	250.922	6394.32	4.71041	1802.37	9.09314
77.6604	4.91521	135.332	435.488	19.2103	17.2852	42.5575	53.0024	1072.58	70.5743	41.083	81.142	9.83043	892.316	4223.36	2.29377	657.86	782.584
3200.83	5.48865	144.917	3.56353	69.3045	176.415	1316.87	716.351	6.10306	3775.25	1324.73	490.62	14.6637	2514.21	8303.47	1037.64	519.579	955.64
121.733	15.0324	1275.7	400.426	140.329	977.595	21.4631	513.517	1630.83	729.008	2391.29	521.545	26.0916	679.364	5751.99	3.60449	951.298	4.50561
576.309	48.8654	687.72	783.157	126.116	119.44	869.378	178.34	28.1806	2825.96	3647.78	3.27681	1118.62	49.8075	3949.95	3.72737	4.66945	780.003
218.932	107.029	135.988	4.58753	233.35	52.4699	12.329	2225.98	1958.47	130.253	254.895	1451.38	519.661	191.079	6.0621	295.322	2271.61	3.27681
97.6079	89.8255	1109.24	471.369	1218.73	93.5938	1955.97	150.938	9.42082	924.47	2619.85	5.36577	20.521	1053.74	2847.14	4.13697	3.68641	867.781
247.071	158.352	9.87139	42.1479	39.4855	167.773	6.59458	5283.89	1173.51	1309	1459.24	4.46465	21.7498	115.262	241.009	99.1235	5.44769	5.16097
153.928	38.8711	18.514	408.413	100.844	288.933	10.1171	1337.55	4.50561	394.651	2568.4	14.2132	141.763	668.387	3166.63	6.51266	420.496	328.869
60.1294	44.2369	269.927	296.019	87.6956	374.99	269.64	9096.01	4.34177	5480.63	440.403	424.183	311.092	321.987	10121.9	60.3342	274.105	2.21185
50.1352	56.3201	10.1171	23.593	687.802	20.1114	105.308	1303.06	5.32481	1301.96	558.368	16.7527	2460.19	155.321	10603.3	1245.88	464.529	157.328
86.5077	211.272	59.4741	12.7386	1796.1	59.515	644.712	5491.19	342.099	3888.83	2826.53	1046.12	5.03809	97.485	5379.54	3.52257	414.393	439.174
17.2852	165.315	925.739	52.7566	7.94626	642.828	331.736	10955.1	468.543	6.8813	542.189	3.35873	4.75137	125.584	325.674	341.566	249.447	2596.3
27.2794	518.924	3.31777	85.4837	13.2711	60.4162	703.531	7779.23	6.02114	1481.08	603.588	3.03105	7.45474	314.041	84.0092	5.12001	898.829	5.85729
60.6619	339.191	3.60449	73.8511	79.3807	215.45	1161.51	2228.64	12.0423	1427.87	964.774	3.27681	117.924	26.4193	11.1411	688.58	629.024	647.579
76.2268	258.663	76.7592	9.25698	308.757	150.078	2038.34	3412.18	1456.66	9.42082	81.7154	4.13697	302.613	42.3937	2994.18	4.87425	3.39969	3.11297
61.0306	396.371	515.893	507.291	874.949	282.87	14.6637	1716.72	5.85729	1877.65	189.522	5.32481	724.093	237.569	3347.67	1100.68	1254.32	3.64545
53.7806	217.539	10.7725	17.7767	1355.7	113.664	204.104	719.055	1477.23	8.76546	1951.26	84.7055	164.168	410.871	595.478	4.13697	3.60449	1403.99
186.123	282.993	8.60162	682.846	6.84034	31.1706	269.722	1779.92	3.56353	1413.21	964.324	78.4796	272.303	881.339	4636.36	385.967	1477.84	617.433
104.489	169.001	63.8978	566.478	3.72737	129.803	17.49	2721.84	1972.15	53.7397	396.903	70.4923	252.601	757.844	12212.7	5.65249	122.02	7.53666
288.646	83.19	336.282	355.165	4.54657	733.841	434.628	11364.1	3.27681	2140.21	190.792	625.788	1211.8	827.476	9820.51	9.42082	91.9554	505.489
75.4076	114.033	469.853	57.8766	5.77537	188.662	765.053	2442.78	3.39969	6.14402	1282.79	68.8949	21.1354	68.4034	2646.27	216.515	213.443	1283.73
129.557	149.504	415.499	15.7287	11.4279	295.65	87.6137	3205.09	4.21889	1391.62	427.787	164.168	19.538	771.647	3885.43	1060.91	2104.04	4.66945
850.291	260.383	983.616	863.521	391.333	210.043	12.2471	1618.25	2852.05	7.78242	874.334	128.492	373.188	7232	908.208	5.48865	3.56353	8.39682
239.248	267.469	189.113	3.39969	2040.26	23.0196	127.918	14416.7	4.05505	911.321	1667.24	175.924	311.665	69.4274	6443.97	8.43778	4.83329	1633.78
77.7832	148.644	316.663	478.127	7.57762	262.227	554.272	1339.31	3.93217	671.377	57.508	171.951	206.849	207.832	2000.61	62.9966	1070.49	1391.7
241.91	71.3935	847.546	1285.57	44.8513	109.773	12.1652	1189.03	8.23298	523.388	1430.65	260.179	250.348	207.75	54.5179	4.42369	22.7738	5.61153
77.005	95.2732	80.1999	419.063	148.726	351.151	1007.7	5651.72	1270.87	2153.44	28.795	483.944	386.745	194.52	11.264	342.222	1135.41	599.533
98.6319	54.3541	295.281	241.787	947.53	104.366	1120.46	629.352	4.54657	9.7485	1390.88	571.516	93.9625	1300.85	23.593	725.24	6.43074	83.2719
190.505	97.3212	484.353	75.8991	89.1701	174.695	101.499	680.716	4.38273	26.9517	1724.17	4.91521	956.91	81.6335	3757.68	3.93217	17.6538	93.1023
132.055	128.942	35.1028	462.399	59.515	647.129	799.787	271.115	70.4104	157.205	22.61	4.83329	8.76546	57.8766	5266.49	3.80929	1917.06	1234.46
181.371	64.7989	169.083	283.444	1886.17	61.1125	5.16097	81.1829	3248.55	1961.46	35.6353	39.8132	1105.14	2601.09	6750.84	1293.81	3.31777	2.70337
146.719	126.812	606.619	41.4107	354.796	11.264	156.468	48.7016	4.05505	714.467	129.884	1100.11	5.07905	769.026	9253.95	3.39969	2.99009	7.2909
188.949	92.7746	5.65249	286.803	971.41	263.906	693.741	760.301	3.48161	2199.64	502.867	3.31777	1215.57	798.845	16528.8	204.514	3.97313	331.04
288.236	114.033	1520.68	33.874	950.889	307.078	56.8117	878.963	4.75137	4.95617	1020.44	258.376	50.0532	565.577	259.646	249.939	247.071	1449.17
173.343	239.699	134.103	364.995	6.0621	617.146	6.0621	594.946	580.773	757.967	6.22594	4.66945	254.731	151.634	6678.26	58.2043	1694.64	2.94913
114.033	219.628	241.91	5.93922	5.40673	137.421	187.392	1265.34	10.8135	1610.84	6.14402	4.62849	128.983	502.785	14261.4	1177.03	3.97313	211.928
106.087	247.645	419.309	463.3	23.634	525.436	24.4941	77.2917	8.35586	1527.81	1024.08	12.1652	549.193	183.706	4960.56	3.60449	1964.82	288.482
155.566	314.86	66.5192	842.672	625.911	102.032	16.7527	363.603	15.442	425.248	395.961	268.371	3066.85	89.7436	2518.19	3.52257	3.97313	107.029
34.4474	118.866	110.592	6.18498	115.303	4.05505	4.17793	299.828	11.8375	852.093	583.722	96.9526	4.42369	616.859	15675.3	513.025	3.76833	13.2301
88.3919	95.6009	426.19	1234.74	159.171	623.044	301.507	42.3527	105.472	223.724	2693.7	338.822	4.79233	879.905	5974.2	3.85025	1794.59	8.80642
82.4937	81.2239	180.798	310.314	134.349	84.3778	292.783	540.796	1248.22	15.9335	81.9202	63.3243	243.385	5291.02	15173.5	4.13697	5.07905	169.657
100.475	79.8722	75.1208	275.539	635.988	600.27	10.4039	913.779	6.38978	208.937	1957.73	425.453	11.264	1075.08	3820.59	532.604	4.42369	203.039
123.085	86.3849	184.32	3.52257	1024.17	8.47874	61.8907	956.337	7.45474	3220.49	25.9277	363.603	24.2074	82.2069		4.91521	699.517	191.12
118.334	52.7157	304.456	4.83329	1984.76	8.27394	1054.85	171.295	10.8135	2774.88	60.0475	133.981	31.2526	2546.98		1231.59	5.32481	61.0715
75.0389	16.466	684.443	794.339	6.02114	326.411	8.19202	4381.22	5.89826	37.0689	1447.2	1008.6	544.769	605.595		3.56353	5.16097	57.7128
311.87	203.858	883.469	2.94913	5.69345	507.496	600.352	3278.41	22.2413	812.608	6.51266	406.365	110.224	798.681		3.60449	1342.59	138.281
73.8511	114.197	12.2471	1193.29	27.4023	271.402	435.447	977.144	31.9489	880.847	32.6452	89.0063	381.543	43.9092		1380.64	5.69345	1069.59
98.0995	132.137	413.779	1072.83	37.8062	143.606	39.9771	1102.03	243.303	2686.2	112.395	82.6575	323.585	862.046		3.52257	7.4957	172.647
176.292	58.6139	10.8544	121.652	123.863	4.09601	502.212	1709.51	1108.18	31.4574	1853.81	657.246	544.442	663.963		3.23585	118.702	137.708
125.543	81.5925	1005.41	453.469	486.074	166.339	970.795	441.099	827.517	1352.22	1156.47	3.35873	237.732	1812.81		426.272	1303.43	34.5703
308.389	190.874	7.86434	3.44065	604.243	4.01409	225.444	226.305	446.916	70.7791	1198.29	3.15393	2838.25	2683.58		4.30081	931.72	82.2889
107.397	125.707	34.5294	579.422	1036.45	5.36577	2386.62	2629.19	163.267	1789.1	6.18498	3.85025	5.61153	1671.95		4.58753	3.48161	10.8544
133.202	123.536	634.185	2.45761	77.2917	1093.68	271.565	2236.95	14.7456	1011.59	674.08	4.99713	206.357	201.974		1559.11	3.23585	368.436
71.2706	193.332	3.31777	3.11297	187.638	51.5688	34.2836	1010.73	73.1138	8.7245	32.1537	8.5197	24.1255	1011.71		6.18498	2358.24	66.8059
70.6971	105.923	3.19489	379.659	1849.35	94.454	1647.37	255.263	90.8495	49.9304	906.652	1565.54	128.369	1029.45		1000.08	3.80929	48.1281
19.3741	70.4104	4.09601	672.811	502.908	867.003	11.7965	4603.06	301.057	430.286	1533.01	3.11297	415.417	37.7243		3.52257	6.8813	304.784
30.9658	152.658	9.29794	265.954	1826.25	207.75	127.714	521.013	164.905	1566.48	6.18498	2.94913	290.94	105362		211.641	798.64	13.1072
32.3994	121.488	48.1281	157.533	1317.65	15.1552	405.095	600.229	1787.7	421.357	1551.61	4.71041	775.58	5617.19		474.564	242.074	71.6802
69.5503	154.42	37.7243	5.48865	182.354	63.4882	693.291	1726.92	518.186	1038.75	7.9053	159.785	7.00418	1638.77		86.7535	1316.46	39.0759
75.6533	177.972	90.9314	52.8385	75.0799	6.8813	1403.62	448.595	130.376	864.217	1223.64	4.17793	8.35586	488.081		3.93217	4.75137	182.354
33.4644	528.099	1283.85	441.509	552.06	547.063	14.336	278.815	28.9998	683.215	1199.15	4.05505	32.891	2257.52		693.004	5.36577	745.515
67.4613	152.904	4.38273	253.461	7.45474	418.08	478.783	64.3893	16.6708	767.879	33.7511	28.8769	138.732	1668.06		4.25985	14.7456	3.27681
121.201	329.975	4.30081	2.99009	4.09601	725.403	144.507	3130.34	317.318	1756.21	955.026	660.809	1045.34	307.16		4.30081	1256.33	3.48161
47.4318	343.737	344.638	466.863	5.36577	38.2567	156.877	638.978	508.315	1262.64	33.3006	421.561	1698.9	198.206		427.746	3.60449	6.2669
100.229	831.449	750.635	372.45	14.9504	8.19202	550.135	4043.38	355.493	386.09	1337.27	204.063	6.10306	860.326		4.38273	1744.49	543.418
172.975	4.21889	116.204	359.261	1833.37	26.8698	1278.08	2388.47	1961.33	588.72	582.412	395.06	9.78947	628.246		3808.63	4.25985	2.86721
173.548	4.13697	4.01409	3.39969	7.65954	450.725	115.958	3944.5	276.645	147.825	446.342	401.286	23.3882	155.321		4.05505	3.44065	313.017
96.7478	6.2669	154.911	4.01409	4.38273	106.128	2207.87	2633.08	227.042	128.983	575.817	5.07905	1400.51	2834.73		299.418	1941.1	3.93217
349.103	78.3567	296.264	448.431	7.2909	320.021	910.215	204.964	1515.44	2572.42	37.7652	4.58753	952.609	144.835		1149.42	4.01409	6.6765
213.73	113.91	306.341	571.434	18.9645	296.387	244.45	492.914	152.822	38.5025	3.76833	14.5818	183.993	824.732		3.15393	650.692	634.923
161.833	519.005	1702.14	4.05505	1656.43	168.018	7.20898	533.26	1025.52	42.2708	6.10306	56.8936	6.34882	443.721		4.54657	280.945	557.754
388.589	668.059	3.56353	848.079	3.72737	9.78947	248.669	358.237	825.92	3972.56	48.8654	334.48	7.16802	1902.51		407.553	170.886	578.111
134.554	3.27681	3.64545	3.68641	3.35873	62.7509	149.873	2276.4	39.2807	7.65954	853.158	715.819	149.545	1441.92		5.07905	1018.96	347.178
65.741	3.11297	4.87425	5.12001	4.42369	67.0517	2395.22	92.8975	322.684	760.834	543.582	3.60449	158.27	2531.25		1308.43	4.17793	1433.77
160.973	4.05505	17.6538	217.662	368.231	624.56	426.149	508.765	25.5181	1441.35	5.44769	3.35873	268.534	186.573		3.60449	868.19	1322.6
173.384	5.20193	202.466	247.604	15.401	725.608	716.228	293.111	739.084	1696.53	2051.36	4.01409	1517.65	408.454		3.39969	8.76546	8.02818
99.574	182.109	821.045	42.8852	22.6509	166.503	6.18498	801.589	37.8471	56.3611	153.559	7.37282	7.82338	763.947		715.819	926.149	525.6
142.295	986.934	3.31777	21.8727	1194.27	340.788	25.8049	144.999	499.181	1331.78	12.288	211.354	9.05218	516.343		4.83329	3.60449	3.60449
118.293	202.548	3.60449	45.8753	4.50561	6.8813	797.493	3232.08	36.987	744.819	84.7874	17.8996	256.902	2320.1		218.932	4.01409	4.71041
115.016	111.289	4.13697	33.3415	3.89121	683.051	116.572	188.621	21.8727	1597.73	5380.31	13.6807	387.687	330.343		471.819	1878.1	387.769
46.3259	620.259	5.85729	289.629	7.0861	25.6001	2012.04	266.937	222.29	6.63554	55.6648	68.6491	275.825	174.162		1160.93	3.44065	3.19489
509.257	133.571	7.74146	650.979	113.582	115.303	15.3191	1041.37	28.6311	1170.64	2129.6	216.843	137.585	277.054		3.56353	1887.77	150.283
221.676	139.387	990.702	654.01	1035.64	202.834	1410.17	1185.55	227.124	3045.59	976.284	309.986	146.514	159.908		1000.25	5.69345	464.774
132.875	116.327	3.85025	3.03105	6.79938	346.932	433.44	142.582	161.506	10.4039	1344.06	446.793	669.493	295.281		3.80929	2610.55	100.844
211.395	759.114	3.76833	312.116	5.32481	19.6609	366.798	144.999	123.29	46.0392	520.111	169.698	183.296	977.144		3.68641	4.13697	87.1631
70.7791	249.201	12.288	324.076	1796.63	865.323	3569.55	38.0519	43.5816	1535.88	1212.09	559.638	327.107	438.437		1255.96	3.52257	1507.45
239.084	147.456	930.327	341.935	4.95617	4.58753	10.4039	643.074	167.895	11.4688	755.018	9.17506	1385.52	163.595		3.23585	554.928	3.19489
152.413	225.158	3.52257	344.966	4.42369	9.09314	593.307	103.179	216.106	730.073	40.8782	9.66658	65.3723	114.361		3.11297	7.20898	177.603
214.959	133.612	3.19489	58.9826	6.75842	1113.38	111.166	2607.56	236.627	3102.89	2050.42	25.1495	130.294	371.672		1751.78	1132.75	1655.89
138.937	90.9314	4.38273	330.917	895.183	500.614	383.96	56.0334	1577.91	5.48865	620.464	345.498	80.2818	186.123		3.48161	3.31777	3.68641
81.5516	89.9074	8.15106	28.5082	5.36577	4.46465	691.98	934.628	11.3869	3334.23	433.235	327.968	1632.67	216.884		72.7861	2.94913	11.5098
31.826	810.887	108.421	313.713	11.1002	5.73441	12.9844	342.263	1335.42	6.02114	152.413	119.89	1375.36	54.2721		358.688	3.93217	1407.27
844.106	179.692	352.707	290.776	29.1636	513.148	75.2847	422.872	930.081	2217.7	1540.76	267.306	1456.42	12.5748		604.653	1793.97	1428.98
91.8735	398.214	202.302	196.035	97.0345	6.79938	1666.18	1890.68	914.639	12.8205	953.756	1870.28	9.66658	806.586		3.72737	3.48161	3.15393
183.583	101.335	25.2314	15.2372	951.831	169.534	154.788	2222.04	437.904	1455.8	40.5915	3.97313	14.9504	394.446		3.60449	3.31777	38.5025
208.282	468.543	612.886	105.431	4.46465	82.2069	8.56066	299.541	145.654	7.41378	689.4	3.44065	60.0475	115.262		1219.87	7.20898	497.133
134.103	128.82	188.253	1293.19	3.93217	3.60449	7.2909	72.4584	107.275	1541.49	608.503	3.89121	705.497	321.209		3.89121	1717.25	1298.31
259.851	532.031	113.869	2.86721	5.20193	1265.83	1570.08	466.495	81.1829	11.1002	2722.9	6.43074	5.77537	221.103		4.42369	4.95617	40.6324
143.483	156.222	213.771	24.8628	8.06914	576.145	11.6736	853.568	292.005	3259.85	521.176	7.82338	1044.97	349.635		388.015	7.00418	193.823
159.171	1351.44	127.877	574.097	22.2823	5.65249	693.946	449.373	137.585	147.006	1509.71	48.8654	4.62849	1108.46		6.30786	491.808	174.736
253.502	1136.44	485.828	3.39969	26.6241	975.301	169.821	39.5265	57.9585	179.815	1233.39	28.795	5.03809	573.441		883.305	4.38273	128.983
134.595	20.6029	82.0841	37.2327	61.5221	9.29794	543.827	411.117	206.316	721.185	492.791	63.1605	7.20898	1441.92		990.047	2250.96	951.708
1228.23	28.3034	259.032	458.507	69.796	275.989	144.384	1149.38	325.551	548.906	674.613	61.3582	208.61	324.65		3.07201	3.97313	2.86721
277.423	88.8425	187.679	625.338	398.296	4.83329	61.7269	130.54	1565	1207.95	15.8106	718.809	811.379	138.855		7.04514	445.359	10.6496
300.647	67.9119	99.2054	79.8312	116.9	5.52961	32.6452	2246.99	601.335	1245.39	1241.79	9.7485	6.18498	724.953		277.177	501.475	2751.21
102.155	1536.33	198.575	321.455	119.972	40.6324	452.773	1328.75	12.4519	268.821	1447.78	236.749	279.798	759.032		4.25985	11.4279	2.49857
179.897	4.25985	73.0319	343.778	115.753	421.479	11.0183	736.012	31.1297	1711.76	54.3541	211.436	12.8205	442.205		374.662	1659.7	237.61
57.0165	4.46465	67.9938	3.39969	38.3796	44.7694	503.973	55.9515	9.42082	680.184	1376.55	1610.76	12.2471	539.322		612.476	4.21889	387.319
130.908	29.819	112.395	416.687	18.8826	965.716	6.96322	179.733	2371.47	68.2805	15.6058	4.83329	240.927	154.952		2323.13	3.89121	65.0446
117.064	20.9716	135.742	3.97313	48.7016	138.363	206.889	48.7016	6.6765	1874.74	4092.41	3.89121	63.3243	211.969		3.31777	1586.92	86.9173
208.241	68.2395	269.558	199.148	25.8868	85.1151	790.079	718.44	5.57057	2889.45	1992.71	4.95617	128.123	111.534		3.44065	3.39969	284.918
161.547	105.308	197.592	148.521	22.6919	631.236	7.9053	910.42	1273.61	5.85729	982.51	27.1156	107.07	344.024		700.459	3.23585	704.432
166.871	205.497	1942.21	19.3741	16.6298	3.72737	44.0731	276.112	3.80929	2467.68	2655.07	32.85	543.131	287.827		6.38978	509.298	3.48161
95.5599	284.755	758.049	69.9189	36.2497	543.213	11.4688	494.02	3.35873	948.063	216.761	38.011	41.2878	168.1		1279.68	1427.42	4.01409
83.9273	94.8226	11.9194	472.802	52.7157	40.2228	18.1453	137.995	3.89121	760.056	59.2283	71.1477	49.6436	368.108		3.27681	723.601	12.1242
280.085	139.305	11.1821	2.99009	36.2497	4.21889	756.369	170.927	4.50561	1961.09	2.70337	680.388	640.657	92.9385		3.31777	7.82338	56.7297
117.76	998.321	136.643	4.01409	42.066	295.609	9.09314	263.824	4.87425	46.203	40.2638	3.80929	103.957	166.052		173.056	1542.56	414.598
39.3627	344.515	353.445	824.609	133.571	40.5505	1646.8	2162.45	626.935	3333.25	107.643	3.31777	150.651	83.4767		1635.41	4.58753	4.95617
181.986	332.105	522.897	3.31777	58.6139	62.0955	66.1096	315.024	48.8244	9.3389	24.5351	4.21889	492.259	279.43		7.20898	9.42082	523.921
305.03	322.069	33.874	903.375	49.9304	791.882	24.1255	971.574	905.177	1225.73	20.2753	4.99713	526.788	182.068		966.208	1650.69	959.859
310.6	628.901	552.675	1884.08	30.0238	50.4219	606.332	296.51	478.783	8.02818	17.0804	190.546	213.115	126.034		3.19489	4.66945	591.546
207.504	1504.42	2590.15	1340.58	18.6778	4.83329	1223.23	355.698	1018.55	637.012	17.1213	58.4501	512.042	106.128		3.35873	576.432	2.74433
90.4809	5.73441	535.717	23.8797	25.8458	793.07	135.947	1493.32	11.6736	1314.94	43.9912	1661.18	278.734	83.8863		518.227	6.43074	545.711
138.077	5.28385	8.5197	108.79	10.0762	480.667	593.471	321.004	980.298	39.4446	268.289	3.19489	96.9526	207.34		9.42082	1199.6	416.564
104.653	9.21602	24.7809	6.14402	26.4602	60.9486	8.1101	1743.1	3.64545	3005.28	747.317	2.94913	185.549	208.159		70.2466	4.75137	20.8487
132.301	45.8344	557.467	347.915	16.7117	1035.43	1435.41	164.578	3.60449	47.4318	47.4728	3.27681	202.589	739.412		526.665	1566.93	333.825
61.3173	106.087	5.07905	2.70337	31.867	160.523	1926.23	3838.54	3.85025	2484.48	27.6071	3.85025	1971.61	239.903		341.525	3.76833	127.468
286.147	282.83	518.227	897.395	25.7229	5.07905	86.3439	66.3554	6.10306	9.09314	12.9434	9.29794	241.542	311.706		3.89121	3.76833	1577.82
406.201	99.5331	7.0861	4.01409	12.5338	353.813	714.426	65.6181	477.882	1315.56	17.9405	39.6903	289.752	125.625		3.72737	573.523	5.16097
84.5826	498.525	10.1581	276.44	62.7509	442.082	140.821	147.415	626.853	1893.26	65.9867	72.8271	248.3	243.876		725.69	832.596	1472.76
96.8706	288.892	626.116	359.507	13.6807	1102.4	210.658	476.489	620.464	2195.54	65.7819	507.332	412.304	43.8273		300.852	4.54657	3.39969
203.736	928.893	4.13697	874.416	29.0817	4.05505	1664.13	298.19	1084.99	3468.95	112.19	4.54657	87.7365	433.44		505.816	833.62	1398.91
163.103	4.09601	3.97313	2.70337	10.8544	5.07905	333.497	826.288	405.792	4063.86	543.991	4.34177	430.368	335.422		4.91521	3.44065	2.66241
305.603	3.64545	322.315	3.48161	9.66658	30.0238	11.3869	324.24	4.42369	20.6439	41.4926	8.56066	1229.79	208.159		353.199	3.35873	226.509
399.361	4.83329	3.11297	379.332	5.07905	521.504	787.786	461.948	5.61153	1905.87	75.981	2015.61	228.885	118.334		193.7	5.03809	3.89121
340.583	6.6765	3.11297	3.19489	12.8615	4.95617	14.0493	51.8555	16.1383	7.00418	135.578	3.97313	127.345	37.3147		6.75842	7.78242	680.634
514.582	90.2761	3.97313	4.25985	33.5873	359.097	283.321	72.3355	372.86	12.6567	80.036	3.39969	106.251	47.9643		9.91235	1674.33	60.7438
737.651	41.0011	5.28385	909.847	70.9839	46.8174	29.2455	85.1561	852.38	1320.06	73.5234	3.72737	203.49	281.437		118.866	3.80929	66.3963
536.987	555.747	282.83	65.741	48.7835	410.174	1111.49	1253.13	595.027	13.4759	143.852	4.25985	269.599	42.0251		676.415	4.75137	57.6309
107.315	78.7253	7.24994	455.026	24.6989	8.43778	5.81633	986.647	3.85025	2819	61.0306	8.47874	547.514	35.7172		857.827	1308.02	100.188
126.976	244.86	535.021	2.58049	8.7245	237.241	1120.55	129.598	4.17793	4414.97	53.0843	94.6178	6.2669	72.909		4.01409	3.60449	1000.41
44.155	316.007	5.85729	2.94913	21.1764	175.391	144.343	313.591	5.69345	3570.82	42.107	442.041	10.6906	332.35		4.66945	3.31777	6.22594
30.3105	1310.64	802.49	843	4.17793	4.75137	927.542	721.594	1164.91	9.58466	94.2902	8.97026	352.626	38.7892		837.061	4.62849	270.378
104.325	276.972	288.523	793.192	6.75842	91.1362	938.437	498.157	2701.36	2072.58	64.1845	16.2612	854.755	252.109		4.34177	2702.79	559.433
93.5529	466.618	38.5435	3.27681	48.0462	321.537	73.0319	4261.16	230.523	155.976	51.7326	38.8302	48.21	60.8667		4.42369	9.66658	6.18498
134.882	5.16097	625.215	4.30081	89.1701	1772.18	170.476	492.3	182.354	1515.65	2176.05	67.8709	540.428	356.066		1152.41	1756.57	1000.94
54.1902	5.24289	971.451	1039.98	41.8612	603.67	351.192	413.574	378.758	7.9053	38.6254	54.436	32.5633	882.485		3.76833	4.34177	408.618
372.901	9.62562	8.60162	356.353	49.3979	4.25985	569.878	62.9557	261.981	14.2541	928.934	127.181	18.1453	216.597		602.687	4.58753	4.21889
892.48	20.9716	59.4741	3.68641	34.7751	12.329	25.8049	268.944	70.861	2843	153.396	1017.49	29.0407	268.657		5.52961	1583.15	267.838
230.892	32.3585	245.474	830.999	21.7908	10.4858	51.9374	412.182	222.987	2444.66	128.86	6.22594	29.2046	209.798		839.805	4.13697	71.5573
80.1999	39.0759	492.218	10.7725	21.5041	624.068	171.91	162.284	92.8975	58.2862	123.044	2.74433	67.1336	154.092		3.64545	1567.99	50.8725
451.913	65.4133	72.8271	436.758	36.987	3.89121	17.6538	798.517	135.455	2151.39	58.9006	6.75842	116.613	160.154		633.12	3.64545	151.716
188.826	161.629	96.7068	35.0618	10.6906	128.615	769.763	976.776	1420.87	711.928	508.397	47.9643	213.361	145.531		282.83	2733.51	62.669
385.885	101.417	19.6609	345.703	10.4039	3.72737	35.4715	2312.57	16.2612	1150.04	247.194	1214.79	394.077	58.2043		4.42369	3.85025	23.4292
69.3045	252.355	956.091	6.96322	15.7696	11.305	56.8117	4586.43	886.418	2673.88	127.263	3.52257	41.4926	352.667		174.654	1587.57	14.8276
117.146	238.961	41.5335	233.432	107.807	416.482	1023.67	1194.56	4.83329	60.2523	100.598	3.11297	166.79	71.5983		799.295	4.50561	149.627
95.8876	512.452	16.2612	4.05505	37.7652	24.4532	85.9753	4492.38	409.683	705.292	123.986	6.71746	121.201	133.653		4.05505	4.54657	76.7592
718.358	379.127	1182.23	869.501	32.809	653.314	180.839	1568.94	358.688	1685.51	98.3452	592.488	645.081	1142.5		3.97313	320.267	59.8018
219.382	460.351	4.62849	34.0378	36.946	106.824	780.577	168.592	145.982	709.798	142.091	4.75137	159.622	106.906		513.476	3790.94	97.2393
142.664	158.147	4.25985	653.396	161.137	841.239	11.0183	293.848	414.271	576.309	100.967	4.54657	621.897	21.7498		575.449	3.89121	128.369
251.946	37.6423	8.68354	3.39969	26.665	580.364	17.2032	5755.14	1463.75	840.583	55.8286	7.16802	289.875	44.6465		3.44065	3.60449	1011.67
169.984	121.897	570.247	245.433	17.1213	802.982	257.967	105.267	214.098	1559.23	105.308	562.136	288.154	620.546		519.661	4556.69	995.822
90.8495	360.203	8.1101	3.27681	10.3219	5.89826	259.974	1501.97	143.319	2113.34	42.7214	1964.04	122.676	168.592		598.468	216.556	221.389
68.0757	339.682	19.3332	4.17793	45.8344	599.205	943.229	2050.01	279.512	774.31	107.397	3.52257	239.821	120.177		1690.05	5.65249	3.39969
37.6014	6.96322	18.1044	485.091	26.706	59.1054	7.16802	2144.67	439.625	2431.51	304.866	3.03105	262.636	54.2721		3.56353	1119.23	1166.38
62.9557	8.23298	87.0402	60.6619	49.9304	7.53666	403.703	601.745	102.155	752.478	1890.43	3.48161	679.119	100.025		3.48161	5.32481	18.1863
30.802	18.1863	192.799	705.579	39.6903	5.73441	72.0488	150.324	33.6282	1804.83	79.5855	4.30081	241.214	107.889		271.238	1523.88	271.688
44.9742	360.777	60.3752	4.01409	18.432	1249.2	159.499	832.105	1780.17	1085.89	547.923	71.885	408.208	594.413		280.822	6.02114	1094.99
85.2789	605.186	395.593	768.944	8.56066	111.534	252.273	184.73	687.474	2729.66	191.407	1277.63	753.461	51.2001		1113.21	4148.52	2.94913
56.6478	4.01409	402.433	55.5829	4.21889	5.85729	12.1652	2058.16	38.1748	40.5095	141.067	3.31777	483.043	90.1942		7.0861	3.80929	364.75
255.059	3.56353	48.9883	76.3906	9.29794	426.354	52.9205	442.779	312.976	679.856	43.2129	2.94913	153.641	41.9841		172.237	3.31777	3.64545
59.0645	5.65249	54.1902	84.9922	14.4999	6.92226	198.575	148.112	80.1999	1784.26	296.592	3.39969	114.033	25.7639		5.89826	9.3389	4.87425
313.836	275.621	875.604	544.114	114.279	541.575	729.131	56.9755	144.794	540.919	468.625	244.368	170.804	159.867		1233.35	1751.04	276.726
126.526	956.091	4.34177	2.66241	20.2343	885.639	37.5604	8.35586	459.368	1027.65	1074.06	20.562	658.106	681.494		3.72737	3.76833	1063.94
78.3157	5.03809	5.12001	3.07201	31.2526	4.21889	390.514	165.725	67.7071	45.0971	1337.63	610.183	669.247	52.0603		3.60449	3.27681	3.93217
142.828	4.25985	13.9674	445.523	15.2372	153.518	73.3595	72.5403	270.378	888.302	107.275	4.25985	145.122	988.818		1841.77	266.568	4.66945
49.8484	7.20898	48.0462	4.05505	19.2512	3.56353	150.365	7.2909	250.43	4458.02	52.4699	3.60449	69.6322	214.549		1632.59	1176.66	618.293
96.2972	11.4688	77.6604	373.188	14.2951	554.354	900.221	4.75137	877.406	23.7159	941.755	424.019	683.46	564.062		3.60449	4.05505	428.074
96.9116	57.3032	3.93217	853.445	82.4117	4.75137	8.64258	20.0705	4.25985	1767.8	35.5943	4.13697	119.644	364.135		2.04801	4.66945	3.80929
138.978	837.921	564.144	4.66945	14.8685	7.45474	1369.21	31.7031	4.13697	539.772	278.283	3.48161	172.852	146.514		1546.9	815.188	4.62849
408.045	3.89121	34.7751	413.451	10.24	589.744	370.075	25.2724	7.24994	508.643	14.1312	4.13697	812.403	436.348		3.56353	5.24289	1064.92
121.652	3.56353	50.0532	3.44065	152.617	9.78947	10.9363	657.737	6.14402	524.945	251.372	8.1101	16.5479	151.552		3.52257	8.68354	2.99009
108.749	4.87425	28.754	487.302	123.822	517.941	51.0363	91.7097	6.6765	3880.6	143.852	252.929	37.3966	324.445		226.55	768.453	475.629
88.4329	10.0762	111.862	21.4631	95.519	3.89121	499.508	477.472	10.1581	251.208	64.4302	110.306	109.077	346.113		5.93922	3.64545	2.78529
87.5727	36.5364	166.994	16.1383	118.62	4.87425	45.22	1034.82	706.849	206.111	35.7172	263.414	809.003	29.2865		70.861	4.17793	664.823
137.626	1450.19	41.7793	372.491	128.328	342.304	10.4039	2545.26	277.423	383.919	458.221	398.747	33.4644	106.251		756.943	1649.05	2.78529
330.876	3.60449	775.457	416.933	106.087	1192.02	778.734	1668.26	173.794	937.126	34.3655	66.765	367.822	248.874		3.64545	4.17793	14.7866
104.899	3.52257	127.959	444.13	131.113	3.68641	1101.17	1613.99	111.698	397.559	191.12	483.083	891.988	512.124		127.468	4.66945	462.071
138.732	9.29794	95.8057	482.469	111.043	1457.81	86.7535	54.9685	128.451	603.957	547.022	86.3439	52.4289	43.2948		1497.38	2611.94	210.002
157.819	9.91235	228.435	3.48161	53.0433	4.05505	8.23298	245.228	162.734	1079.22	187.229	65.0037	700.95	243.262		3.76833	4.25985	16.9165
129.925	117.023	279.061	1206.4	37.7243	39.4855	631.564	97.8537	121.037	53.0433	827.927	610.633	143.893	283.321		3.64545	3.72737	61.3173
510.199	747.932	303.596	3.39969	64.5122	68.4443	64.5531	16.0564	78.6844	864.463	79.9541	19.1693	219.587	96.9116		1376.46	1264.07	70.7381
77.5375	9.17506	183.174	1029.08	113.009	668.674	9.21602	13.4759	332.555	2121.57	57.4261	36.4545	309.945	151.143		3.64545	4.13697	62.2184
163.922	70.4104	116.572	169.411	303.555	6.6765	18.432	6.6765	155.771	61.8907	83.7225	51.6097	459.613	171.049		3.56353	3.68641	42.0251
63.3243	119.685	132.178	157.942	1014.5	423.364	296.428	70.5743	2530.19	392.644	411.731	43.2129	376.219	41.042		314.492	771.525	116.982
46.9812	1053.49	284.755	19.0055	280.782	11.3459	598.222	1237.28	3.07201	62.2184	624.887	104.858	503.072	656.386		3.64545	3.93217	8.7245
89.1701	3.64545	80.7733	541.493	222.168	444.171	66.8879	733.595	3.19489	94.7407	218.891	156.754	168.264	53.371		3.85025	4.05505	37.2327
160.768	3.15393	67.0107	2.49857	230.523	294.667	159.54	3444.58	3.72737	596.461	199.558	507.741	121.037	40.8372		386.459	1035.88	25.0676
73.7282	3.85025	46.6945	2.94913	153.723	7.53666	298.763	86.3849	440.895	913.656	1013.48	4.25985	284.099	152.372		1150.32	4.58753	49.6846
1137.5	6.2669	159.089	417.916	219.341	1212.3	111.043	433.931	91.5868	1071.93	41.4516	3.72737	121.57	178.299		3.64545	5.28385	92.8975
185.017	54.8456	730.974	4.01409	167.404	4.09601	70.4923	1210.7	277.177	752.396	29.0817	4.95617	324.445	512.37		3.64545	3794.5	61.9317
466.003	1375.28	919.104	450.971	128.328	5.16097	283.403	140.575	112.517	636.233	86.6306	106.578	459.531	70.1647		193.209	2757.39	9.37986
106.906	3.56353	105.759	251.536	107.725	1199.72	305.603	812.444	62.5051	78.6844	159.908	1011.1	365.897	136.438		204.637	5.81633	86.3849
145.408	3.48161	195.748	58.9006	97.4441	2110.22	48.1281	229.254	40.3047	1814.82	183.296	4.13697	1194.07	40.5915		1700.75	1734.62	1285.25
161.71	4.09601	2023.14	20.9716	141.149	39.4446	1012.41	63.7749	651.348	644.63	433.276	176.907	80.077	285.656		3.31777	3.93217	3.64545
116.245	6.10306	13.5578	526.255	44.6056	9.05218	231.056	16.5888	382.69	360.08	723.765	4.38273	332.637	305.644		3.56353	3.64545	244.696
233.964	8.19202	12.6157	2.70337	52.3061	970.181	212.501	444.048	1644.26	61.3173	120.546	4.05505	280.208	294.913		909.069	994.634	80.6095
371.099	1021.59	69.9189	3.68641	28.1806	368.723	15.8106	58.7368	91.2591	313.877	210.412	448.595	150.16	236.708		3.60449	5.44769	983.165
168.838	3.97313	794.135	951.339	38.011	306.054	578.234	808.266	4.75137	37.2327	752.15	6.92226	596.789	75.5304		106.21	1087.74	1176.29
137.749	3.64545	7.04514	3.56353	25.8868	4.99713	384.411	654.911	5.77537	442.328	569.509	6.6765	112.067	81.4287		6.4717	4.05505	877.406
118.211	4.30081	9.1341	5.36577	22.2004	159.826	255.222	1243.18	15.0733	1342.75	91.2591	15.2372	1436.72	516.548		791.39	221.103	4.95617
583.354	5.57057	17.9815	398.009	67.6661	628.369	570.82	30.1057	75.1208	133.612	113.541	19.1693	261.817	158.679		3.89121	718.932	852.462
132.793	14.2951	9.42082	394.077	17.5309	350.905	964.16	54.5589	119.317	577.374	310.56	77.5784	124.355	682.723		4.34177	3.80929	3.35873
31.5393	136.069	10.9773	251.741	11.5098	4.46465	210.658	74.0559	42.5575	253.052	670.845	44.8104	418.571	42.1479		528.918	2449.05	4.25985
851.724	891.865	793.07	67.0517	12.8205	651.757	25.2314	6292.21	249.324	2563.37	561.973	1511.39	443.639	132.219		3.64545	3.97313	815.475
368.068	875.973	30.1466	30.4334	8.97026	580.446	67.748	3060.13	1652.33	133.571	736.217	3.64545	139.879	32.3994		3.72737	1598.92	364.299
162.161	4.42369	220.529	480.708	7.41378	13.5578	55.6648	1918.12	4.01409	1108.87	90.9314	3.72737	1138.53	25.7639		2003.56	6.96322	5.77537
97.7718	3.93217	54.5998	4.05505	22.6919	267.838	303.924	501.434	4.38273	565.004	43.2539	713.73	10.5677	62.7918		3.23585	2605.35	459.286
346.236	7.00418	113.214	513.763	31.0478	10.3219	1258.17	296.674	10.0352	920.333	125.133	3.11297	18.2682	186.041		439.297	5.12001	4.17793
76.1039	70.4104	905.505	3.97313	7.00418	111.862	627.673	2459.24	1438.27	883.469	439.912	4.13697	219.464	76.2268		5.69345	3076.1	936.635
47.3499	405.464	3.80929	2045.79	14.8276	4.30081	301.303	1521.42	22.6919	431.883	582.412	4.46465	298.558	63.5291		4.83329	4.30081	23.7159
219.546	505.12	3.35873	56.8936	10.7315	5.85729	153.396	915.909	11.6736	829.483	271.32	99.1644	918.817	996.887		230.155	3.72737	184.239
506.472	332.514	52.4289	43.6635	41.3287	705.62	38.3387	2265.54	14.377	794.667	231.097	520.562	516.138	714.058		3656.39	3893.83	52.6337
1282.34	1089.5	276.931	685.549	17.5719	10.9363	27.4433	725.24	242.812	1162.16	1164.41	12.7796	111.985	74.957		4.62849	3.72737	11.8375
218.235	4.30081	604.53	367.904	9.29794	50.9953	331.244	1492.55	89.9894	252.642	93.7577	18.2682	823.503	287.704		165.356	4.25985	78.4796
123.208	4.13697	1040.63	575.776	28.8359	696.813	183.542	4495.45	335.177	856.558	376.956	48.0872	578.766	13.8445		224.748	877.611	16.2202
203.94	5.07905	3.31777	764.479	18.9236	17.0804	133.243	6578.4	2017.12	426.149	574.302	591.546	536.946	97.526		185.713	10.7315	59.7608
950.971	109.282	3.48161	4.75137	49.1931	3.97313	22.61	1810.07	5.40673	63.2424	146.228	4.38273	42.0251	205.415		369.173	1142.58	46.0801
173.671	324.24	657.123	85.5657	43.4996	106.005	301.303	2090.81	5.36577	1072.95	16083.1	3.60449	79.9951	53.6168		91.0953	4.99713	23.1015
209.961	814.492	4.54657	1351.93	32.1537	4.01409	1066.52	2084.95	21.3812	525.395	14413.6	5.32481	654.829	23.3473		182.395	7.41378	49.8484
3055.3	5.32481	4.79233	37.2327	7.61858	723.192	164.742	145.326	489.064	129.721	622.389	11.0592	321.946	21.4631		346.072	1849.02	67.5432
173.548	5.32481	7.37282	327.681	27.1156	5.81633	809.249	843.123	4.50561	237.937	1087.04	113.255	382.772	188.539		341.157	6.10306	41.6564
418.448	73.892	12.9434	129.475	9.21602	110.633	6.84034	2027.44	4.46465	830.384	20034	131.851	179.364	396.985		1447.69	290.366	57.1393
294.462	199.476	1205.25	189.195	5.73441	379.618	241.05	9723.77	31.9079	1502.42	6187.72	726.591	1003.93	130.171		12.4109	1792.62	82.0021
158.679	790.776	18.3911	378.471	8.39682	1123.58	367.371	1030.72	225.813	11.5917	4134.19	3.93217	221.963	160.85		1187.88	4.01409	22.61
107.643	2157	66.5602	2.94913	13.8036	714.098	716.106	5315.64	1228.52	509.503	7585.03	3.35873	404.317	111.985		3.52257	6.55362	71.885
272.467	14.0084	1946.83	3.60449	42.5575	10.4858	65.2494	954.821	429.917	1097.49	4311.83	7.7005	520.193	204.35		133.12	1860.57	52.2241
58.4501	134.349	43.2539	997.379	12.4519	49.3979	4.95617	1126.32	701.442	1029.2	1359.34	565.454	664.455	943.024		246.375	4.66945	114.074
150.61	238.06	75.1208	2.74433	94.9865	447.489	186.942	86.0981	1288.97	350.578	2581.84	162.284	577.374	99.8198		4.99713	406.324	72.3355
159.171	326.862	562.177	1432.33	55.1733	934.464	177.603	1334.52	2.99009	45.0971	2668.18	533.956	8.19202	67.2565		94.3311	837.716	58.2043
46.5307	857.582	4.38273	110.633	23.8797	5.52961	564.922	2397.27	2.90817	153.068	2454.37	4.13697	7.2909	121.774		15.1143	99.9427	879.577
148.03	9.37986	14.4589	601.745	7.98722	1104.9	100.639	2401.08	4.01409	152.249	2487.88	2170.6	7.74146	53.0024		329.934	2618.54	3.35873
90.0303	48.5787	86.4668	10.7725	20.3572	522.118	60.4571	199.23	4.42369	830.138	143.688	3.35873	408.372	95.7647		53.7806	4.01409	10.5677
270.582	1261.61	123.74	399.197	19.5789	802.941	594.741	4557.79	1089.5	292.865	4.34177	2.99009	8.7245	714.549		1729.25	3.56353	285.942
247.686	4.58753	45.9163	7.45474	14.9504	25.9277	471.328	2112.31	3.27681	70.3695	925.412	3.44065	9.95331	311.174		3.39969	1096.17	3.31777
144.139	4.21889	398.829	1086.75	39.3217	288.236	322.602	301.139	3.35873	840.993	2158.52	4.01409	45.0561	186.614		3.48161	2001.43	1536.29
104.817	6.14402	75.8581	3.31777	26.0916	19.1284	651.225	139.715	3.72737	456.296	375.072	5.48865	729.868	149.136		127.796	5480.18	3.60449
72.4584	333.743	1940.94	3.89121	24.5761	8.06914	547.678	219.669	4.54657	407.471	2402.31	778.16	7.0861	143.074		4.38273	1154.62	367.617
278.856	1220.86	5.03809	380.847	9.1341	568.854	1319.49	465.143	1991.52	360.244	277.505	4.38273	11.2231	126.28		3.97313	4.17793	3.31777
418.039	5.03809	5.32481	423.527	84.6645	1030.56	118.088	615.589	6.2669	672.36	1426.39	3.60449	17.408	121.365		122.594	5.20193	332.473
347.137	4.38273	610.469	1157.29	20.9716	66.4783	214.754	291.718	4.13697	529.286	259.155	4.25985	30.3514	282.379		200.582	586.016	881.011
330.548	36.7003	15.2781	59.2283	9.7485	6.43074	83.4767	1388.22	326.411	201.769	1248.59	5.65249	600.598	359.875		1294.05	211.108	3.48161
219.71	140.698	18.7188	447.899	57.8766	8.68354	149.504	2485.99	461.948	907.021	1026.71	12.2471	9.29794	45.5476		3.35873	2499.26	4.50561
199.271	602.482	471.328	11.8784	15.9744	430.286	77.3327	47.5547	94.0034	193.455	1952.24	32.7681	11.5917	62.0136		3.11297	4.17793	1826.45
51.9374	1918.74	5.32481	476.694	6.71746	658.557	153.805	3599.33	160.646	78.7253	3878.23	37.6423	10.8954	139.141		337.757	7.98722	2091.18
445.646	4.50561	7.16802	331.9	8.5197	510.281	58.1224	500.532	178.054	353.609	1865.24	64.635	703.94	78.8482		4.58753	536.332	398.337
188.416	4.25985	69.4683	410.543	76.964	639.387	120.382	307.365	1294.46	153.355	471.778	589.457	15.2781	93.2662		33.5054	1639.92	579.422
223.192	4.83329	1528.39	5.40673	71.1887	5.36577	31.7031	395.306	725.895	261.776	763.947	4.95617	509.503	29.4503		18.1044	2580	13.5168
121.692	1131.6	4.01409	4.05505	40.018	1340.67	968.092	1490.25	178.135	250.84	162.12	3.93217	658.27	431.556		526.296	4.42369	55.5829
247.194	7.45474	3.80929	428.607	25.4362	148.603	340.051	117.801	174.285	105.39	70.7791	106.291	181.617	105.923		8.80642	4.50561	75.7762
523.347	106.332	4.66945	69.0587	6.71746	142.951	410.338	29.4503	130.663	147.866	4403.91	201.647	778.406	148.521		904.932	1436.8	1408.99
100.27	880.315	532.318	145.572	5.24289	256.533	7.4957	259.646	16.384	50.7496	886.418	646.924	606.496	72.2127		4.62849	4.01409	3.76833
178.504	33.3415	8.88834	408.086	7.4957	695.175	792.087	1018.8	57.0984	412.182	263.414	717.539	390.514	330.876		384.083	382.813	4.58753
275.17	161.629	11.9604	3.93217	10.6906	5.52961	16.0154	384.984	127.058	836.037	22.4871	655.034	442.492	47.7595		7.33186	4147.66	1536.41
184.771	789.834	64.635	95.8057	19.538	1315.64	12.7796	354.428	390.104	414.721	1576.51	6.71746	514.909	49.1112		3171.38	4.13697	679.078
441.058	339.764	403.416	764.602	142.91	896.862	2839.76	88.9244	103.056	517.408	3259.73	8.27394	359.671	99.3283		3.19489	3.64545	1280.33
257.352	346.891	3.11297	94.0444	60.3342	5.40673	5.73441	125.338	87.1631	32.7271	194.601	32.6862	367.535	222.864		170.23	2039.08	181.33
67.8299	869.46	3.11297	264.971	12.5748	217.826	745.064	1675.27	65.0037	589.58	5792.33	740.231	293.52	106.537		195.052	4.34177	1364.75
185.549	4.71041	3.80929	418.489	4.30081	4.01409	156.468	334.275	262.841	1104.57	63.4472	3.48161	310.805	151.389		220.406	260.465	3.89121
342.713	5.36577	5.65249	410.666	48.4558	431.269	662.202	1516.26	191.079	367.781	3254.28	3.19489	602.155	434.136		60.2523	552.429	4.21889
168.633	27.3614	434.259	816.949	114.033	493.119	1375.65	139.92	883.714	158.475	10365.2	3.56353	93.1842	61.3173		180.921	1213.24	1884.33
393.135	202.138	5.12001	622.307	23.0605	907.225	2.99009	104.121	407.225	1327.15	4165.81	4.99713	86.1391	128		278.693	3.80929	2.86721
311.215	1555.71	5.85729	268.125	54.5589	6.22594	3.31777	2236.91	1352.13	440.485	3990.46	530.925	162.489	317.523		96.7887	3.56353	786.188
145.777	1226.18	7.33186	498.607	36.0039	16.8346	45.0152	2634.96	4.46465	298.681	6246.91	593.512	572.663	71.1477		72.4175	336.487	1738.43
137.544	4.42369	15.1962	7.16802	80.5685	1516.92	1395.67	4947.24	4.62849	752.109	398.542	4.66945	839.805	145.777		94.1673	1135.58	1069.14
1758.5	4.21889	815.434	199.23	72.9499	13.8855	71.5163	3206.64	7.04514	199.803	1833.17	4.17793	581.838	140.78		1440.08	3.89121	3.39969
132.506	9.25698	3.72737	415.049	47.3499	489.924	105.349	687.27	206.521	125.01	1785.25	13.0663	55.6648	47.5547		3.72737	3.85025	8.56066
165.52	9.91235	3.27681	2.49857	35.922	197.796	430.122	216.556	173.589	1003.81	6297.04	207.176	396.617	254.854		3.52257	501.884	295.118
523.265	976.817	4.50561	999.59	65.0037	828.664	1192.96	1177.64	25.3543	38.1339	521.709	187.392	986.319	244.86		267.388	4.95617	2046.78
159.007	4.75137	6.79938	15.1962	40.8372	5.48865	7.74146	309.863	40.059	83.6405	112.272	153.682	67.6661	345.785		5.07905	1701.11	1256.7
241.787	4.25985	20.6849	189.031	135.455	24.7809	5.57057	273.409	87.6546	278.283	3076.55	78.2748	129.475	59.6789		55.6238	3.72737	4.87425
158.434	23.8388	15.4829	40.6734	236.217	320.103	10.8544	2179.12	73.9739	393.135	1199.93	506.349	312.362	37.6423		4.42369	1753.5	359.835
237.569	817.031	227.165	23.4292	108.872	3.39969	790.284	198.657	168.141	14.7866	1009.05	2266.77	349.881	30.7201		210.207	3.72737	4.46465
239.535	3.35873	8.3149	479.192	103.793	783.731	1226.02	69.4683	462.767	301.794	259.155	3.60449	533.751	116.04		299.255	3.52257	2657.04
308.512	3.19489	17.9405	2.62145	47.4728	255.837	6.34882	185.713	2.00705	1572.54	261.735	3.11297	187.597	48.8654		1389.61	12.6976	432.334
252.847	4.21889	805.44	3.31777	138.773	4.95617	374.293	1556.16	113.869	8.60162	1129.64	3.52257	1763.86	19.2922		6.8813	348.489	1769.39
93.43	497.051	4.42369	771.156	82.5756	139.51	432.58	470.754	2086.59	381.42	823.913	4.34177	1885.89	10.1581		507.127	4.95617	4.21889
139.551	8.23298	4.34177	4.30081	91.8735	8.39682	67.6661	257.066	23.1425	25.641	2847.14	32.7271	294.135	719.792		4.54657	4228.72	10.4039
80.7324	8.64258	554.805	189.563	98.3862	427.623	1243.22	65.9458	121.119	731.466	606.947	48.21	404.235	223.069		4.30081	359.261	581.306
129.762	13.9674	7.0861	13.353	83.6815	25.3953	15.442	346.4	91.5049	140.657	4821.21	41.4107	295.363	100.475		783.976	153.396	7.57762
181.822	45.5476	9.91235	665.561	211.846	436.512	931.474	629.188	12.0423	595.724	828.131	23.1834	1207.46	562.915		3.31777	552.183	627.918
178.463	65.4133	13.0253	6.84034	362.743	3.48161	7.82338	496.109	113.787	1753.99	84.5826	1578.89	469.894	44.114		10.3219	1497.79	2.78529
191.775	94.0034	67.6251	126.362	687.638	225.813	201.647	102.974	60.1294	200.95	582.33	4.17793	100.311	422.422		903.908	3.48161	14.8685
183.706	774.638	765.258	50.0123	315.925	906.078	9.17506	768.862	130.622	248.628	171.09	3.23585	1162.37	243.917		9.09314	3.39969	702.916
120.914	3.85025	7.74146	325.961	338.617	5.65249	206.07	500.696	134.923	1043.75	1097.44	407.021	125.42	28.0986		182.191	9.17506	2.90817
418.53	3.68641	14.6637	573.892	46.8993	6.22594	14.2541	557.385	384.124	678.504	1701.89	4.34177	1552.35	23.1015		5.16097	907.43	651.143
272.589	10.281	192.922	224.789	25.682	642.91	776.071	375.645	129.311	1609.24	3325.51	8.76546	277.464	298.681		307.283	631.523	3.52257
297.78	81.101	38.3796	302.245	39.7313	4.25985	478.168	133.899	99.9836	876.137	53.9035	1219.96	371.508	483.78		179.651	149.177	354.1
341.853	1182.85	149.627	5.24289	25.4362	2.29377	6.96322	368.19	254.854	133.981	580.814	3.11297	606.783	186.246		81.5516	80.9781	5.48865
860.531	4.01409	483.247	671.377	19.1693	142.869	834.685	2866.02	1201.69	350.168	199.844	2.90817	53.4529	107.807		59.4741	343.655	1147.37
644.507	3.64545	59.3102	2.74433	15.0733	249.447	251.577	680.47	241.378	267.224	125.092	3.35873	284.099	268.371		33.1777	2799.46	5.24289
109.773	5.24289	246.293	3.31777	13.8445	36.2087	186.655	41.2878	131.973	1682.97	113.91	4.91521	246.498	53.8216		45.4248	1359.83	782.01
307.447	12.4109	134.8	934.751	41.1649	468.338	2614.57	595.929	354.141	43.3358	2900.18	1202.59	399.607	35.3486		90.317	5.36577	337.266
462.276	257.721	1315.72	25.0266	9.01122	697.223	565.004	376.014	75.1618	1159.25	76.9231	3.60449	584.296	79.3807		379.086	448.063	4.21889
117.433	23.7978	428.033	16.6298	19.497	61.2354	1034.9	348.325	198.575	72.4584	21.6269	6.63554	231.138	159.376		174.695	274.023	1145.04
157.942	378.185	127.181	317.728	92.5289	37.8471	422.79	568.649	75.2847	370.894	58.2862	4.38273	725.322	49.275		2089.29	274.351	281.601
120.3	20.3981	1056.57	3.35873	62.0136	40.3047	737.118	186.164	286.639	330.466	260.916	16.6708	35.5534	58.6958		3.56353	1694.6	1047.47
83.3129	992.545	573.441	6.18498	59.0645	220.652	46.9403	772.139	63.5291	303.514	37.4375	54.5589	424.101	116.04		3.35873	580.446	4.30081
149.218	5.16097	57.7537	957.156	54.1083	328.746	96.502		102.605	1219.67	212.255	38.4206	229.663	20.2753		191.529	4.83329	237.978
489.105	4.79233	1521.09	3.35873	40.5915	82.6985	1122.76		39.9771	773.573	269.149	558.655	1181.33	26.7469		78.3157	1526.26	3.23585
135.496	5.89826	3.44065	669.698	24.9857	25.3133	207.299		41.1239	440.567	147.661	996.15	334.685	18.2272		5.12001	1250.35	1838.17
249.939	382.076	3.56353	3.76833	177.152	714.262	132.997		72.6223	1311.62	106.291	3.80929	664.905	226.427		303.678	3.56353	5.48865
142.623	6.6765	4.25985	2064.84	77.1279	236.995	110.51		307.651	57.0574	244.491	3.31777	420.824	289.137		78.7253	3.31777	577.578
251.741	5.32481	6.51266	3.44065	30.2286	253.502	98.3043		180.224	1261.28	1628.78	10.6087	84.0911	84.173		48.7016	6.22594	4.01409
222.413	10.8954	8.5197	997.051	59.2283	688.662	688.621		184.607	16.2612	2716.35	236.422	153.437	267.183		10.3219	1544.11	1299.01
1119.4	69.3045	1253.17	90.0303	146.924	5.89826	622.102		94.495	129.721	1515.73	166.134	1794.99	643.606		51.4049	184.771	3.56353
519.661	545.916	3.07201	220.734	58.1633	271.852	9.83043		86.7535	1180.06	830.057	97.6079	13.7626	92.1193		141.189	1060.01	4.09601
1677.64	404.891	2.99009	232.367	152.699	161.547	17.3261		191.98	828.664	379.004	253.011	25.2314	187.761		7.04514	4.05505	496.6
924.306	711.477	3.52257	277.505	213.607	204.063	10.4039		105.431	1304.95	92.9794	113.951	30.3514	224.338		191.693	614.156	1357.62
30.7201	5.12001	4.34177	1780.21	173.548	100.393	88.1871		113.582	327.066	793.397	103.465	1090.24	61.8088		200.909	3090.28	513.066
91.1362	4.71041	382.813	490.825	218.399	375.113	1405.91		9.50274	154.747	109.814	321.496	398.91	43.3358		2.90817	7.2909	4.21889
151.921	9.46178	6.18498	3.03105	453.101	395.265	428.443		14.8685	552.552	2154.01	23.2244	7.82338	103.301		150.856	334.726	1395.67
139.141	115.589	337.266	1230.4	85.197	903.17	308.593		5.28385	211.354	249.98	102.318	7.74146	97.1574		193.659	5.40673	3.35873
163.513	260.015	314.328	119.604	259.482	317.728	8.9293		11.264	1059.02	115.385	232.039	47.6776	137.421		1367.74	1597.03	10.8135
355.452	59.1464	6.4717	164.209	239.617	164.209	388.466		260.67	549.848	118.989	272.344	324.158	182.436		4.38273	3.97313	808.389
111.248	100.885	9.37986	408.045	191.775	109.937	319.98		38.2977	169.657	112.149	5.61153	126.567	158.598		4.58753	4.01409	5.03809
78.9301	802.531	679.446	291.595	69.2226	34.1607	498.034		199.066	3380.4	562.669	6.02114	398.706	72.0079		250.881	1958.1	467.682
52.4289	62.8328	4.34177	4.21889	28.6721	9.5437	8.76546		14.0493	46.244	288.523	411.362	137.626	218.481		50.4219	4.58753	6.43074
176.661	2355.78	209.716	270.501	80.2818	336.487	674.121		418.039	117.187	99.4511	557.795	586.59	37.0689		11.1411	362.538	882.608
459.409	271.565	15.6877	134.841	94.8636	21.4221	411.158		97.0345	562.587	242.689	6.10306	449.414	61.8088		1085.81	293.029	3.39969
511.182	613.5	34.8161	208.487	82.7804	290.817	193.618		770.337	111.821	236.872	226.714	308.184	109.814		5.48865	1310.23	11.5098
462.522	910.461	952.814	159.417	67.7071	464.242	54.9685		222.495	245.023	171.09	7.61858	722.454	177.767		115.303	4.91521	1445.89
167.24	228.435	4.38273	27.3614	109.568	223.765	839.191		118.784	175.186	844.679	10.0762	53.6987	132.424		4.01409	1223.97	4.58753
4.71041	151.225	4.38273	27.6481	122.635	301.999	1278.69		1061.56	52.9614	211.682	32.5223	737.773	414.025		9.91235	391.538	2104.53
1764.19	297.329	8.56066	246.744	103.547	49.8484	7.65954		788.441	106.988	687.392	48.7016	2780.17	179.569		435.856	5.16097	14.377
6.22594	916.933	15.36	13.8855	139.141	36.2497	113.009		301.18	2476.41	132.014	66.9698	4.75137	45.138		4.17793	999.14	792.005
7.7005	418.039	25.1905	97.1983	160.359	11.5098	823.749		1899.12	319.98	142.746	159.253	24.4532	106.332		4.99713	5.77537	465.02
452.486	68.6491	21.545	99.7788	290.735	51.0773	12.0832		722.905	222.659	264.111	95.0684	681.126	103.67		196.404	720.161	3.85025
230.237	312.075	15.0733	20.3981	248.996	70.4514	519.702		4.42369	1352.13	252.929	712.911	4.21889	292.005		23.1834	394.692	1461.78
586.467	215.86	365.405	154.952	605.554	204.76	8.47874		60.8258	1310.4	76.1448	192.021	4.42369	107.725		505.448	34.6522	2.99009
125.256	290.039	3.64545	18.6368	38.3387	219.956	124.928		60.7438	1187.02	195.257	332.965	5.40673	157.574		280.413	1279.35	517.203
228.639	1096.42	3.60449	734.947	27.1565	235.807	962.112		146.76	887.483	412.837	402.31	413.246	112.19		1238.8	5.36577	425.412
69.9189	546.981	4.75137	2.58049	56.1973	127.632	7.78242		1116.37	16.7936	187.474	360.94	761.366	41.9022		46.9403	1684.57	782.379
82.9033	9.70754	679.856	2.86721	44.3188	238.838	55.2142		9.5437	289.014	536.168	796.797	49.4798	719.341		3.85025	7.12706	2.94913
263.947	15.7287	375.236	137.503	37.1508	98.9596	789.916		252.847	1495.78	102.892	5.61153	191.284	189.359		4.05505	1609.2	1472.43
140.452	97.7308	3.56353	468.051	66.3554	16.0154	51.2821		42.7214	1078.6	585.115	4.17793	85.5247	200.172		328.377	8.60162	926.19
347.178	194.97	3.39969	451.38	54.9685	186.368	118.989		25.1495	29.2455	42.5575	5.69345	89.3749	69.0178		4.91521	336.323	258.335
102.318	296.961	5.69345	377.406	67.8709	149.218	47.0632		16.1792	24.6989	24.7809	23.7569	173.917	254.936		6.34882	1983.62	3.76833
259.81	248.3	12.7796	5.81633	82.3708	197.141	90.358		15.6468	348.079	57.5899	52.388	680.634	30.8839		73.9739	5.48865	4.99713
163.431	101.704	344.761	4.30081	31.0478	345.171	69.796		990.825	4429.55	45.7524	382.281	806.586	116.531		195.953	884.656	869.624
278.447	981.978	401.696	23.4701	45.22	67.6251	2259.85		402.023	95.9286	29.9418	482.141	47.1451	354.551		51.1592	4.54657	2049.36
72.7042	4.58753	714.385	1089.87	33.5463	8.35586	9.3389		742.525	1985.7	54.8046	6.14402	417.383	48.3739		161.096	3471.33	1252.44
233.186	4.54657	22.4871	63.8158	83.3948	12.6157	659.949		111.903	5.48865	123.372	1220.73	242.443	158.598		424.551	4.09601	478.455
164.578	108.38	984.804	21.4631	80.9372	360.367	1029.66		487.302	1927.38	48.7835	4.21889	792.005	125.215		304.375	4.13697	5.24289
125.215	903.949	4.42369	582.739	81.101	513.926	627.796		574.752	454.002	73.6872	267.551	6.71746	366.839		402.146	1727.62	1937.99
139.264	4.17793	3.97313	140.985	86.221	227.247	489.842		272.098	611.084	47.3089	4.58753	749.488	36.6183		162.325	780.7	363.193
109.2	4.09601	16.6298	539.977	171.869	288.81	210.207		956.623	16.0564	54.6408	4.21889	2107.97	185.754		123.044	4.75137	1210.9
32.85	5.24289	204.841	124.437	297.452	40.7963	644.098		168.96	943.27	190.137	881.912	110.592	99.574		32.3585	10.8954	440.567
154.788	115.467	7.65954	580.569	2059.39	105.104	1785.7		248.915	11.264	20.6439	3.68641	183.378	23.5111		15.8516	778.201	1202.83
140.043	74.3016	16.7936	3.72737	5.36577	176.661	502.908		194.683	1086.71	34.9799	294.012	90.5628	26.4602		68.4853	3.60449	6.02114
289.055	179.487	11.9604	157.41	5.16097	19.0874	1312.48		2305.23	666.257	32.7681	21.9956	689.031	242.975		91.3001	3.80929	574.506
710.535	120.423	204.104	98.6319	9.95331	145.367	790.981		4.71041	442.861	17.9815	26.3783	2005.61	22.7738		115.18	6.59458	720.161
219.71	149.627	975.67	251.782	72.2536	249.816	7.33186		4.83329	138.773	44.6875	78.3157	617.76	127.222		230.155	3509.34	6.38978
119.071	286.639	631.81	106.537	712.173	268.289	1154.67		394.692	138.281	26.5421	90.2351	1209.76	117.596		640.739	4.79233	1148.93
61.9726	696.772	221.635	340.501	52.388	415.54	1502.21		582.944	52.4289	9.62562	147.784	5.44769	98.5091		980.872	5.89826	3.56353
352.503	161.629	510.691	740.231	21.5041	139.715	483.903		210.166	59.0645	5.24289	1193.62	6.38978	20.9716		322.151	1495.74	996.928
101.54	382.772	331.449	43.4996	25.8458	31.0068	10.6087		11.1411	209.675	6.14402	160.85	8.1101	20.562		93.1023	5032.85	5.24289
128	2803.27	733.268	564.307	12.7386	108.626	1378.68		60.0475	464.447	129.884	444.54	521.217	124.724		3.56353	3.93217	898.501
147.415	21.2993	5.12001	3.11297	9.29794	87.6546	172.237		90.5628	1214.39	692.553	310.764	5.20193	19.7018		1604.57	1379.86	8.02818
335.013	30.5972	5.52961	4.01409	14.4999	9.09314	14.9914		433.604	229.663	313.959	152.413	6.96322	145.163		886.172	3.76833	592.365
96.2153	84.7465	9.99427	657.492	40.0999	134.882	644.63		35.1028	181.535	218.031	573.564	962.89	62.3003		10.6087	4.13697	408.905
117.965	236.749	563.324	238.388	35.7582	138.486	150.774		74.3836	3234.78	170.312	1093.18	5.85729	234.128		3.39969	1601.38	1276.19
69.3045	187.311	10.6087	36.2087	22.2823	115.835	616.081		181.74	585.77	112.231	5.03809	6.18498	99.1644		3.15393	4.09601	3.44065
199.23	248.71	16.384	61.1534	43.5816	18.514	518.637		591.546	236.422	452.814	3.64545	104.94	194.11		192.799	3.64545	4.01409
392.111	194.438	41.0011	7.94626	141.353	14.9504	207.709		670.763	607.07	274.965	5.93922	368.354	176.292		67.1746	2309.9	553.576
361.842	202.507	607.111	72.8271	46.6536	410.093	711.477		565.127	354.674	417.629	9.42082	167.773	127.017		91.0543	4.09601	4.71041
75.8172	1304.09	7.86434	553.371	36.0039	447.858	296.019		173.589	1763.29	1211.89	12.7796	324.773	99.4511		193.25	3.56353	6.79938
219.423	349.922	480.38	2.49857	40.0999	6.51266	7.33186		1079.34	1104.33	678.996	31.5802	165.929	566.396		35.8401	4918.9	883.141
218.358	637.38	22.4461	3.07201	51.0363	279.102	1607.52		155.116	1005.37	113.787	248.259	106.578	342.467		104.653	4.71041	2.90817
103.506	288.81	34.2836	331.859	62.7509	299.377	2591.42		890.35	86.6716	133.202	78.6024	156.222	87.1631		21.1354	628.656	3.31777
140.821	372.327	877.775	246.662	63.693	97.1983	6.84034		2424.88	2943.48	139.141	230.605	644.999	96.7068		107.152	892.644	518.391
198.083	417.179	10.9363	4.79233	30.6382	135.373	13.4349		257.475	30.3514	83.7634	1017.49	5.93922	271.606		77.9061	3.56353	3.89121
664.701	73.6872	16.1383	486.115	53.2072	433.686	761.858		347.301	80.6504	518.268	687.556	13.5168	80.9372		44.0321	3.56353	1605.27
184.976	315.188	16.0973	167.445	51.1182	19.1693	509.585		191.857	954.125	128.205	3.31777	41.8612	36.2497		189.154	1908.62	277.669
349.308	1176.42	82.0841	3.76833	74.7932	228.926	347.137		424.756	539.445	66.9288	318.752	22.2004	63.2834		230.851	2780.04	3.89121
147.006	968.174	33.1777	619.972	62.3003	221.799	709.961		1611.98	39.0759	134.841	4.99713	94.6178	194.847		108.258	4.09601	5.61153
272.958	271.484	552.675	87.8185	734.538	167.199	73.7282		1147.5	354.674	44.0731	3.97313	1018.6	158.598		650.119	3837.35	1413.49
1193.37	304.006	189.645	352.83	845.376	63.693	686.164		2076.19	25.7639	31.2116	6.92226	5.32481	240.477		109.896	3.76833	6.6765
2046.28	178.258	125.297	3.68641	882.322	55.8696	1709.18		99.8198	488.695	278.201	20.4391	6.75842	37.0689		1607.89	616.859	490.497
1422.71	497.788	32.9319	5.44769	90.9314	196.158	1165.89		142.951	559.351	87.6956	696.69	93.0614	50.5038		3.23585	5.44769	656.509
610.674	215.573	691.161	164.086	32.3994	54.6408	457.361		129.475	512.902	43.131	4.46465	71.6802	279.553		8.88834	3776.44	3.97313
217.785	86.5487	99.1235	29.5732	19.0055	170.271	27.8938		24.8218	1128.61	112.558	3.68641	668.346	105.308		156.181	4.30081	6.10306
67.6251	83.0261	772.098	34.4474	70.6971	44.8923	1122.76		23.8388	458.63	45.138	4.87425	464.692	143.77		49.316	4.21889	624.519
1735.97	205.497	401.982	16.7527	68.3624	54.7637	581.388		11.8375	1681.37	42.7623	12.329	190.874	949.619		75.1208	953.838	4.05505
972.966	291.349	105.308	144.057	80.5685	199.394	17.2032		317.441	488.777	14.9095	62.4642	103.26	558.983		34.8161	3560.87	1739.17
2257.15	52.8385	180.347	533.096	65.4542	164.332	9.42082		1117.47	398.829	44.4008	598.386	1043.66	178.709		1575.41	5.57057	1591.42
132.629	72.0898	1660.73	26.6241	68.3624	193.086	14.6637		18.7188	919.882	43.3768	110.92	66.6421	132.875		4.71041	671.049	15.8516
217.334	86.6306	38.2158	62.3413	51.2001	50.4219	444.335		47.9233	847.219	148.972	2268.9	4.87425	462.603		414.271	4.46465	676.456
114.156	116.777	32.0308	59.9246	17.449	383.755	1139.06		151.839	385.598	174.982	3.23585	7.53666	268.207		5.98018	5.85729	4.75137
213.32	291.636	991.48	146.187	23.2653	303.76	2094.41		2908.04	689.195	164.086	500	11.9194	499.918		362.538	1533.22	557.918
453.551	183.501	47.4318	8.64258	59.7198	49.7256	51.9374		219.137	1451.26	188.58	4.54657	9.66658	130.908		5.16097	4.09601	1957.57
362.456	187.147	63.7749	6.71746	114.524	16.2202	919.677		139.469	1533.71	145.613	3.56353	36.6593	299.746		1185.88	3.56353	5.07905
99.1644	334.89	62.9966	145.613	58.7368	16.7936	669.534		456.214	32.1127	58.3681	4.66945	249.119	79.8722		10.4039	756.574	9.05218
883.55	45.0971	188.539	132.301	60.2523	62.0955	7.04514		117.474	319.202	59.3922	9.17506	347.669	355.165		53.0433	5.77537	1234.7
1458.92	853.65	85.197	40.3457	106.906	64.5531	1018.51		89.334	1545.79	23.1834	288.072	231.056	164.823		3.56353	2067.71	643.115
3.68641	1159.79	72.2536	63.5701	486.196	55.419	22.7329		132.957	1540.3	27.1975	130.499	468.666	842.918		536.25	9.91235	4.83329
3.60449	1207.46	1785.57	58.9416	252.355	47.5137	450.725		131.4	6.59458	834.849	1786.56	5.48865	88.5557		11.6327	1435.32	6.75842
5.69345	147.989	732.162	4.21889	496.477	20.2343	10.6496		274.351	287.663	118.334	3.11297	16.6298	269.026		74.3016	18.8826	761.981
162.161	347.751	149.095	435.816	762.595	115.426	30.0647		1090.64	1273.45	1186.08	2.94913	33.9969	234.087		105.431	445.523	4.42369
1680.14	425.739	46.203	731.916	89.0882	105.636	108.38		1117.97	9.7485	220.038	3.15393	215.204	20.0705		10.3219	6.51266	1416.85
4.46465	451.421	356.025	639.838	52.4289	256.287	205.579		183.993	1495.17	227.124	240.149	478.824	17.9815		379.291	9.1341	9.37986
491.48	319.161	118.211	495.658	113.091	368.846	67.8299		415.581	3301.34	679.159	6.43074	687.966	58.491		1833.7	891.333	791.144
5.73441	405.587	78.5615	52.9614	123.003	83.6815	1907.31		302.859	4095.81	1364.26	1042.68	381.134	128.656		4.75137	9.09314	803.105
2699.07	37.8881	126.485	201.729	57.0165	17.3261	118.62		1951.54	8.35586	315.393	3.03105	453.101	53.2072		232.08	1202.71	302.081
5.77537	88.7196	870.771	2735.81	132.916	36.4955	679.282		48.292	95.8057	83.9682	3.52257	184.034	772.385		182.477	4.01409	1647.33
477.431	198.001	1158.31	2.45761	110.756	173.302	14.336		294.421	475.301	116.491	3.89121	482.551	94.2902		94.1673	4.09601	3.35873
4.21889	423.527	6.4717	2.94913	145.572	17.449	336.078		117.433	327.845	104.203	6.63554	13.9264	637.175		898.419	693.864	1672.16
4.34177	123.208	15.9335	130.581	154.911	376.014	636.807		278.693	726.509	1049.44	369.01	14.7866	50.299		4.09601	4.01409	4.38273
17.3671	61.5221	28.0167	210.207	196.445	465.634	1186.66		3634.96	255.714	112.067	200.049	35.0209	24.658		4.17793	3.80929	1701.56
230.319	246.826	192.267	285.779	168.674	154.87	9.09314		8.06914	208.815	40.9191	519.989	44.114	107.356		922.135	757.107	18.514
313.918	437.782	521.955	296.019	613.828	218.645	285.451		87.1631	698.534	85.5247	935.447	1691.2	28.713		6.4717	3.89121	12.6157
1308.68	298.968	504.26	42.2299	165.11	317.236	727.984		110.51	526.092	36.0859	1099.29	4.21889	178.054		253.338	3.64545	981.65
792.619	77.4556	24.1255	483.821	214.631	330.466	58.6958		52.7976	2873.97	16.5888	3.80929	4.34177	389.326		34.7751	1108.34	378.062
321.209	73.2776	19.3332	2.53953	115.139	171.336	7.57762		153.191	857.5	53.7397	3.19489	19.7018	292.455		6.38978	4.01409	398.009
22.8148	217.048	47.1451	76.022	97.0754	56.7297	216.187		28.1396	568.403	69.6322	3.64545	70.861	1133.33		159.458	4.50561	357.705
1420.82	105.063	1361.31	28.0577	89.0063	164.578	506.595		281.806	943.516	97.3212	4.91521	128.164	88.5148		71.0248	856.681	3.93217
3.89121	498.362	537.847	112.313	326.452	44.9742	96.8706		15.0324	1515.56	30.1057	67.9938	659.089	82.7394		1112.85	4.83329	1643.85
3.56353	218.891	359.835	592.283	1499.22	70.2056	67.0517		45.0152	333.333	146.924	54.9685	81.9612	393.995		4.05505	1857.5	6.96322
674.244	124.191	484.599	31.867	110.265	142.418	146.842		17.3671	188.867	108.258	51.5278	219.751	181.617		104.162	4.25985	5.16097
1045.55	84.5417	100.557	17.8996	82.3298	206.152	112.886		327.025	1152.45	41.4926	459.409	172.606	216.638		5.48865	6.34882	988.982
1847.34	121.652	70.2056	559.638	57.7128	415.172	1271.28		107.193	1587.49	17.2032	4.50561	1298.27	365.159		145.982	1797.04	2.90817
291.554	461.211	651.675	12.6976	75.6124	216.187	257.844		50.7905	25.0266	31.6622	6.6765	1592.98	273.818		69.2226	4.34177	416.605
545.261	84.3369	21.5041	99.6969	62.628	872.041	1442.37		404.112	514.869	43.3768	83.7634	5.61153	197.223		30.3924	3.64545	3.15393
5791.96	154.665	167.445	53.6577	65.1266	497.993	6.63554		176.128	918.407	9.66658	1141.52	5.48865	162.939		1030.56	717.13	642.295
533.014	126.567	186.614	89.4159	111.739	235.152	1734.05		41.4107	72.7451	8.1101	6.8813	9.50274	68.6901		3.60449	5.61153	4.09601
1993.86	91.1362	225.567	85.5657	109.896	158.393	5.20193		1734.58	2385.64	9.50274	281.478	30.6791	30.9658		3.56353	1631.24	5.89826
158.229	219.956	41.042	547.923	32.2766	14.336	16.0154		63.652	8.9293	175.555	3.93217	99.8198	164.25		274.883	4.30081	725.035
194.356	101.786	92.2422	3.48161	93.389	968.256	75.8581		309.986	2302.41	502.621	3.80929	1076.14	21.3402		9.5437	471.164	2.82625
92.0783	295.732	117.146	10.5677	251.7	5.93922	92.0783		80.8552	514.705	198.001	4.17793	330.179	308.143		1810.48	27.73	907.225
122.839	304.17	109.814	62.7099	117.76	221.594	344.27		58.3272	1346.48	70.7381	417.302	164.373	78.6434		4.17793	1243.43	4.38273
762.595	111.944	31.2935	425.985	523.593	113.091	937.249		647.825	118.047	28.3854	218.44	1038.22	237.241		4.99713	976.161	1587.78
456.828	109.445	833.129	38.994	82.4937	12.8615	858.155		339.805	2444.79	46.3668	635.865	4.13697	440.116		419.104	3.89121	1309.08
188.294	198.902	371.303	11.2231	59.2693	1156.8	860.449		1454.17	8.56066	200.745	1814.78	3.89121	1191.45		4.58753	3.44065	1468.67
1381.17	253.953	24.617	201.851	72.0079	216.556	9.46178		104.243	1120.91	561.235	6.34882	5.12001	60.0885		1373.31	4.99713	505.652
539.936	199.435	178.176	19.2922	108.831	535.553	15.0324		91.2591	43.2539	101.991	3.68641	4.95617	12.4109		6.79938	1473.66	7.41378
230.155	117.678	675.801	47.8824	43.9502	29.4094	1281.07		17.6538	982.51	49.0292	134.431	9.66658	457.442		188.498	4.09601	558.204
157.574	241.665	157.451	6.43074	39.2807	11.7965	451.749		15.9335	12.2061	564.635	680.347	555.501	352.462		57.5489	760.383	663.963
49.234	267.51	833.743	191.12	18.8007	15.0733	1243.14		292.127	36.8641	319.939	3.80929	25.1495	1072.79		55.5419	4.91521	1063.49
75.8991	153.928	19.0055	750.225	43.0081	1175.1	113.132		37.5604	736.954	651.389	3.11297	10.6906	535.021		47.186	706.07	3.93217
163.267	223.274	17.9405	2.94913	28.9588	250.184	197.96		208.733	2420.21	140.862	4.21889	46.8584	218.891		216.638	4.25985	4.79233
255.591	209.265	48.4148	3.85025	39.6903	57.0165	1079.18		122.512	1122.27	52.388	7.2909	702.671	18.8416		297.821	4.05505	1282.95
59.2283	413.124	104.653	90.2351	50.2171	597.485	7.45474		229.459	10.4858	81.7973	1163.92	168.469	287.417		1629.11	788.687	2.78529
59.9656	91.4639	362.907	388.302	49.4798	1667.77	528.754		85.6476	1728.97	248.013	3.27681	164.66	129.024		3.68641	4.71041	3.27681
266.978	109.486	347.669	1000.78	38.2567	322.766	5.85729		29.5732	5.16097	533.546	3.07201	57.3032	159.294		3.89121	6.75842	1637.91
266.568	145.122	60.9486	34.7342	58.0814	189.727	54.9685		306.545	1378.14	177.439	3.23585	23.8797	185.918		201.442	700.377	3.03105
52.9205	63.5701	551.937	327.23	56.5659	541.697	17.7357		166.503	1901.16	160.564	358.36	668.141	219.259		288.728	10.9363	775.58
51.364	129.229	2361.8	341.73	238.634	312.321	1170.43		41.2468	266.568	117.146	4.66945	170.025	86.0572		34.939	2238.55	3.52257
598.591	112.272	29.6142	557.467	593.799	247.809	497.42		319.284	380.601	117.719	4.09601	1197.59	46.1211		1188.5	5.69345	4.09601
80.9781	71.2296	515.729	99.3692	454.289	502.908	573.728		15.401	1235.23	168.756	397.641	796.961	40.7143		3.72737	557.59	588.064
809.536	247.112	865.118	845.294	466.208	55.0913	13.4759		338.249	225.117	252.683	429.016	1119.4	24.0436		282.83	1204.19	2.90817
185.017	86.5897	65.9048	448.39	45.9163	299.582	788.4		573.646	1312.77	351.192	311.338	779.798	34.0788		5.24289	4.34177	3.44065
1446.75	168.141	1808.92	15.8925	69.8779	263.906	12.0013		122.184	3004.87	133.079	948.595	5.81633	201.155		211.395	5.44769	4.58753
165.602	155.485	68.1576	600.967	50.8725	701.36	26.0097		294.135	12.4928	122.348	3.19489	6.38978	35.3895		1237.69	1565.9	507.823
98.0175	179.241	529.286	2.78529	33.874	263.906	295.036		189.891	2219.83	294.053	2.94913	68.1576	40.8782		3.64545	694.151	3.15393
195.257	145.531	208.528	3.27681	33.6692	14.377	1580.9		7.00418	108.053	126.894	302.859	383.141	86.9583		733.104	305.89	757.229
141.517	98.9596	562.505	4.66945	89.9894	78.3157	19.7018		7.57762	721.922	293.643	4.38273	66.8059	482.264		4.01409	1496.76	4.30081
173.753	108.831	142.295	221.389	19.9066	672.565	286.393		4.83329	569.919	30.5153	4.21889	98.3862	901.081		1954.25	3.97313	1125.3
789.998	177.931	652.044	50.2171	31.9898	240.477	2248.1		233.718	810.805	234.824	929.221	878.676	975.137		3.27681	3.60449	1156.43
192.021	122.061	630.868	202.957	15.6468	314.451	6.34882		49.9304	2102.4	62.0136	3.35873	4.83329	338.249		331.9	352.052	655.689
464.774	82.2889	195.994	52.0193	25.6001	348.898	12.1242		16.7527	1966.41	682.805	6.10306	5.20193	212.665		4.38273	1217.62	219.833
724.748	169.698	112.354	404.973	15.36	4.46465	174.695		20.6029	2833.54	50.4628	1058.61	29.1226	84.9922		6.51266	3.85025	934.71
202.261	151.184	678.627	51.4869	58.1633	486.155	389.572		14.5408	9.78947	52.2241	7.98722	88.1461	78.8072		474.81	4.01409	13.4349
207.463	134.308	169.943	301.999	16.9575	3.56353	335.627		197.1	930.491	29.4913	490.579	36.8641	88.6786		6.4717	8.1101	607.029
663.881	194.642	2649.75	4.01409	16.0564	121.488	77.7423		2824.44	6600.84	14.2951	3.93217	132.547	28.0167		399.074	194.52	1655.4
717.375	82.8213	5.03809	63.5701	7.9053	140.084	28.1806		1282.83	11.9194	886.377	3.44065	70.9839	1041.49		100.557	13094.5	32.9319
5.73441	270.091	5.07905	254.485	7.33186	255.591	645.081		854.059	2368.35	86.4258	4.09601	759.032	97.1164		6.59458	3014.54	20.6439
5.69345	60.4162	8.19202	38.011	10.1171	526.133	411.69		5.44769	5.69345	308.02	9.95331	91.7506	82.3298		573.441	348.284	1746.78
43.7454	126.526	386.622	53.0024	9.7485	55.0913	10.8135		16.3431	11.9604	356.23	14.4589	152.454	54.2312		1450.93	197.96	3.48161
22.2413	138.855	854.182	47.7185	51.9784	1224.13	1081.39		76.1039	441.55	88.5148	28.0986	291.8	867.945		3.76833	1948.88	5.24289
96.8706	364.463	418.735	19.9066	43.3358	183.174	51.5278		1307.82	2373.19	346.195	81.1829	118.088	3354.76		4.42369	356.599	1901.82
134.882	588.187	4.01409	42.5166	42.4756	840.501	17.5719		4.13697	5.48865	59.2693	60.58	441.099	123.781		153.969	4557.55	5.52961
211.682	486.77	3.89121	38.8302	23.3063	904.194	145.122		4.30081	1837.76	405.833	1334.15	404.604	2212.13		298.886	1851.93	2284.84
322.028	159.253	4.38273	3.89121	38.3387	122.389	54.395		5.65249	7.20898	285.574	6.96322	1577.13	391.415		7.2909	31.6212	5.77537
644.343	107.479	1100.8	27.6071	42.3937	408.004	274.023		6.96322	487.139	268.657	433.399	87.4089	1583.48		1427.09	2618.21	597.977
8.02818	162.489	11.8375	62.3003	33.3415	192.062	2678.05		8.27394	597.362	209.675	4.54657	93.471	106.988		3.80929	2234.37	7.45474
63.3653	306.423	599.205	584.378	31.1706	31.4164	6.38978		299.132	424.715	163.636	3.93217	283.894	1152.82		4.25985	2701.85	38.994
63.9387	165.356	6.71746	192.799	16.8756	278.897	10.8954		77.6194	225.526	53.8625	13.312	1469.85	1103.42		427.623	2585.4	728.639
146.883	846.154	14.0903	4.75137	8.06914	262.964	726.346		135.988	875.113	17.6128	71.2296	301.262	391.865		4.50561	5.16097	3.15393
157.492	112.313	637.872	171.09	14.2951	73.4824	727.574		177.439	321.455	445.359	279.43	1380.89	17.5309		173.589	789.301	248.218
1599	186.205	376.341	256.246	27.4842	553.944	1197.88		2995.17	207.012	63.5701	1294.26	1822.89	1097.16		1414.07	3.60449	5.89826
3.68641	124.232	5.77537	27.4842	70.1647	525.764	8.47874		3.15393	569.345	47.4728	3.80929	165.97	24.7809		3.64545	3.64545	234.947
575.121	100.188	1089.25	33.2186	57.9995	162.489	332.719		3.19489	2073.44	43.4587	2.49857	264.766	347.997		3.60449	1376.3	806.791
3.60449	209.798	313.14	12.6157	63.0786	434.177	6.96322		4.01409	2012.98	63.0786	253.461	122.962	35.3895		851.315	5.16097	4.42369
3.48161	592.816	149.668	9.58466	21.0535	413.82	1018.47		6.02114	749.16	435.078	4.17793	50.7496	62.8328		5.12001	499.59	269.19
4.38273	195.503	504.588	58.8187	82.2069	873.065	1910.58		756.656	55.419	66.724	3.56353	141.927	2063.2		780.822	8.35586	4.83329
6.14402	217.58	115.917	50.6676	69.2226	269.64	7.41378		4.01409	1063.61	84.0501	7.57762	1410.38	1087.2		6.8813	1596.58	465.962
8.02818	119.726	77.6194	67.7071	59.8018	262.063	10.0762		4.13697	467.846	61.5221	665.438	28.4673	983.739		1032.24	6.71746	3.03105
19.6199	213.73	60.2523	120.914	89.9484	1071.68	100.885		4.79233	397.436	682.313	3.85025	47.0632	808.512		10.3219	620.546	232.735
346.891	133.858	1841.03	38.4615	42.066	552.47	2.17089		6.75842	47.9233	428.525	848.816	65.0446	434.669		326.739	4.87425	2212.17
2190.46	79.7084	317.85	410.502	91.6687	25.4362	1328.5		249.898	1520.52	61.8907	3.85025	2213.07	433.931		5.44769	552.839	1130.29
41.3697	179.815	831.162	112.722	68.8539	209.921	6.0621		1549.28	578.152	635.373	4.21889	682.436	1174.94		1808.47	1408.29	268.412
71.4754	82.4527	4.13697	468.051	176.497	140.903	1640.78		252.642	1009.09	55.0913	336.774	1053.62	170.967		3.44065	3.44065	6.2669
68.6901	218.768	4.17793	563.447	288.769	216.228	7.78242		815.516	79.5445	175.719	63.9387	270.623	1176.58		3.48161	3.23585	660.031
438.396	128.451	9.78947	144.589	239.33	710.371	26.9517		24.4941	1841.48	229.786	1373.47	286.926	546.613		4.75137	4.58753	300.483
414.189	252.028	36.6593	22.3233	54.5998	207.135	14.2132		207.422	6.92226	47.8004	4.50561	193.7	87.1631		197.51	3873.68	2579.79
309.454	183.911	456.255	104.53	55.46	355.165	716.106		31.2116	605.964	314.656	3.48161	528.426	133.817		168.674	4.58753	153.928
3670.03	243.795	5.03809	515.565	141.804	1135	244.532		285.902	12.5338	558.696	265.585	432.907	626.157		599.738	388.343	89.0063
708.815	254.854	4.79233	95.6418	775.006	1700.09	212.378		1509.13	575.121	193.782	11.1821	648.685	1199.03		848.939	12.6976	1879.78
16.6298	86.5077	15.9744	493.119	363.726	94.2902	726.018		425.862	1674.57	359.22	24.7399	29.6961	2287.25		3.64545	1420.5	2.86721
1280.74	304.866	28.9588	7.57762	196.568	233.309	816.417		112.435	1128.74	329.401	59.8837	105.308	37.3556		3.44065	6.02114	198.657
10.24	74.7932	1005.45	72.6632	745.064	625.911	51.323		344.72	865.856	157.901	260.629	972.966	289.916		301.876	2058.82	610.347
25.641	246.621	4.13697	33.0958	295.732	8.06914	7.7005		2049.03	313.427	489.391	322.561	262.186	639.101		153.273	704.882	416.155
3139.59	134.882	3.80929	77.5784	95.8057	52.0603	405.177		4.75137	1291.43	805.153	925.78	308.184	1328.3		1020.4	1496.07	1928.03
109.404	192.717	6.4717	66.6011	31.5802	185.795	605.022		407.881	185.713	531.13	9.21602	112.149	613.337		3.48161	750.184	8.23298
178.955	220.816	269.477	316.663	27.73	819.98	1962.52		1488.9	548.087	82.6165	35.0618	232.571	213.935		1593.63	4.95617	1408.45
1087.9	94.8226	14.2951	25.5591	112.927	255.796	305.03		304.743	1289.92	8886.17	70.6152	108.667	64.676		4.30081	959.695	1036
3.85025	95.9286	401.696	475.752	46.5716	600.557	119.317		795.978	8.15106	67.9119	667.568	106.005	1071.8		4.75137	1723.31	6.92226
3.52257	156.672	1281.76	4.87425	117.064	457.606	129.925		1022.16	15.5239	117.883	3.85025	166.216	36.7412		229.172	1022.2	2565.58
4.83329	193.25	4.87425	31.867	32.4404	162.939	94.0034		4.38273	1329.2	1858.24	212.911	399.115	348.775		8.7245	3.60449	2.99009
246.088	45.5886	5.28385	221.553	35.6353	33.0548	7.2909		4.83329	62.3413	793.274	326.37	361.391	54.5179		4.79233	49.9713	8.97026
1472.93	150.815	30.1876	15.9744	42.8852	66.6831	55.3371		382.076	819.735	556.115	892.316	274.801	1378.31		542.967	812.075	451.298
3.48161	250.102	78.7253	25.3133	26.9517	227.247	21.9956		11.5098	9.70754	7552.72	819.161	152.003	617.269		6.71746	98.8777	217.13
3.31777	185.304	151.716	234.415	56.1153	295.036	717.744		255.1	817.4	4396.78	4.83329	437.413	408.618		555.911	217.949	234.251
4.09601	118.62	657.287	21.0945	31.785	82.2479	144.589		12.37	78.3976	719.71	4.42369	62.2594	44.4417		28.0577	2492.26	126.894
5.20193	165.274	46.1211	371.467	25.8458	29.5732	64.3893		354.551	2385.11	725.731	581.633	251.085	1194.4		9.37986	3.48161	1133.69
106.496	196.895	25.1085	77.005	14.0903	580.855	1427.42		253.789	228.312	14300.7	522.979	193.659	1142.66		715.532	1017.78	3.31777
86.7125	161.956	728.844	26.1735	56.3611	39.4855	312.526		71.9259	1082.21	2173.18	113.009	201.974	56.2792		4.25985	40.5915	3.76833
876.464	128.492	599.205	61.3992	53.0433	9.46178	62.0546		14.2951	1129.8	12563.9	5.69345	122.594	226.427		465.184	1455.76	273.777
3.39969	432.825	915.008	92.7746	99.8607	53.0433	432.129		9.62562	3509.34	3040.1	3.31777	99.0825	67.748		172.155	4.05505	134.472
3.60449	156.713	151.552	361.186	102.687	289.875	12.4928		8.88834	2135.58	3258.58	2.86721	56.8526	782.87		168.674	1287.25	133.571
2128.61	80.5276	921.029	1085.32	135.291	285.164	143.688		15.8925	3160.65	1002.66	543.254	123.618	104.325		1009.09	14.1722	37.8881
3.31777	46.8584	5.07905	584.378	336.242	131.195	688.58		402.31	50.5448	1483.08	5.85729	139.797	51.9374		4.83329	353.035	73.8511
3.27681	167.404	12.6157	710.74	905.874	249.693	11.8375		83.5586	34.939	1622.88	504.956	308.061	388.056		5.28385	21.6679	42.5575
4.17793	96.3791	1500.61	616.9	880.151	634.882	17.8176		25.3953	430.573	472.024	4.01409	225.117	24.1255		228.762	1770.91	32.1537
124.109	192.676	4.34177	616.409	8.68354	95.8876	32.0718		44.2779	1435.41	1711.6	3.31777	266.405	859.015		1233.72	3.80929	36.7822
490.047	78.3567	4.09601	2.94913	26.7469	413.287	807.856		98.0995	1000	119.071	7.0861	399.853	150.569		3.89121	4.01409	1047.84
587.655	73.6463	8.43778	119.358	188.457	965.061	11.6736		1588.64	56.7297	797.903	684.443	192.349	1773.29		3.97313	370.32	172.811
5.03809	48.292	8.06914	109.118	980.954	532.563	108.503		3.76833	2110.47	77.8652	439.092	338.863	1082.17		211.19	1675.68	848.939
5.69345	220.447	133.12	131.769	1457.2	472.721	549.726		4.01409	6.18498	71.6802	270.255	151.184	3690.55		4.91521	7.86434	4.25985
96.5839	77.1688	395.92	126.321	70.3695	303.228	1055.42		5.12001	792.66	136.561	53.4939	211.518	551.815		349.021	668.756	495.699
851.151	74.2607	10.5267	14.9095	52.388	55.7877	435.488		83.4767	20.4391	82.0431	278.242	399.402	854.674		3.97313	12.5748	438.519
4.58753	109.282	20.2753	12.9024	68.4034	10.0352	1401.2		779.88	112.845	355.657	1017.41	116.613	52.0193		4.34177	947.53	324.445
4.58753	91.3001	38.994	107.111	77.2098	268.289	880.274		229.868	1637.13	212.173	123.577	387.032	31.3345		362.21	704.063	3.72737
891.333	70.1237	829.073	204.801	38.5435	38.5025	7.12706		94.7407	3027.85	15.0324	2796.06	164.25	7241.87		86.8764	25.641	4.30081
5.48865	117.064	4.99713	155.935	24.617	459.613	586.672		27.8529	14.0493	91.2182	286.27	502.376	50.5038		1183.5	4.01409	1221.64
37.7243	454.657	14.5408	17.449	33.7921	8.88834	1401.12		355.698	2614.89	135.578	516.753	263.21	3120.34		3.76833	4.34177	3.72737
21.1354	116.818	563.488	42.1479	111.862	84.3369	18.5959		149.463	1222.17	262.186	48.0462	169.821	1476.16		3.76833	1483.04	217.17
445.523	181.781	5.61153	6.8813	64.717	349.717	394.159		189.563	101.294	67.9528	202.793	108.872	115.63		1107.81	4.17793	379.004
874.048	120.75	18.8826	338.822	117.228	231.138	591.71		26.0506	180.143	622.225	654.01	486.115	160.686		3.93217	3.68641	5.24289
850.578	81.8383	22.8557	210.822	219.874	565.454	265.626		111.698	535.84	476.202	6.0621	45.0971	968.952		3.93217	1391.66	9.62562
691.448	407.348	357.705	57.2622	149.259	65.3314	1573.36		649.791	448.145	1237.81	199.025	99.4511	57.508		244.327	15.0733	956.091
24.7809	117.146	93.6758	137.257	1276.44	122.594	8.60162		236.463	60.7848	1222.9	241.009	550.094	59.8427		269.558	1750.06	880.437
384.574	152.085	729.909	330.016	785.942	218.358	194.151		1493.86	3555.54	2358.97	1816.09	8.06914	1318.83		58.1224	1680.31	255.427
262.554	241.787	657.819	33.833	7.78242	398.009	516.548		41.9022	76.6773	569.264	414.803	29.9828	119.071		1305.11	4.13697	1028.02
244.122	250.061	591.669	28.9178	18.514	343.328	282.748		746.744	2972.47	886.868	270.787	14.0493	113.337		3.68641	6.96322	20.521
2441.22	281.56	32.9729	237.937	307.078	805.48	446.383		99.615	14.8685	1649.3	1311.58	406.283	508.397		315.802	507.209	17.6128
1025.56	90.4809	52.1422	261.489	147.047	714.836	315.147		81.1829	1434.34	450.561	4.17793	32.3585	74.4655		388.302	4.25985	88.9653
6.2669	197.796	255.673	3.80929	148.603	103.179	5.77537		216.269	1647.37	7142.42	3.85025	27.73	169.165		4.38273	4.01409	788.687
404.276	146.473	112.395	192.062	742.975	12.7796	9.87139		317.646	5.98018	18.9236	618.211	37.8062	283.444		4.25985	444.171	1281.31
960.76	78.5205	317.973	348.202	897.395	74.1378	1104.41		228.312	2038.63	59.3922	5.03809	97.1164	707.094		309.986	9.01122	7.0861
1619.69	173.302	246.047	76.7592	121.733	12.9434	146.76		1213.69	1291.59	34.5294	442.861	359.753	770.541		1407.35	3186.04	205.865
780.577	45.3838	112.64	21.9137	144.548	252.97	7.20898		867.289	12.7386	1046.69	9.99427	61.1125	82.2479		3.19489	7.16802	230.933
1200.87	39.8542	231.67	458.262	82.0841	192.717	12.37		3.85025	1543.66	1475.87	779.594	938.314	696.69		3.19489	3181.62	1340.01
6.2669	166.38	307.324	2.99009	85.4018	155.444	2194.31		4.34177	835.709	4377.86	4.38273	748.833	193.455		4.71041	3.56353	4.50561
1462.64	65.0856	1416.24	4.25985	108.38	51.8555	7.2909		6.18498	22.1185	1421.11	4.54657	284.837	1528.34		182.805	923.077	545.343
3.80929	92.8156	45.3428	219.546	66.0277	411.158	306.709		423.282	1258.83	9161.92	201.933	325.018	1781.52		180.347	4.79233	3.35873
3.56353	154.215	34.0788	3.19489	98.0585	929.385	649.545		1235.07	11.1411	427.542	542.476	798.435	270.173		99.9836	4.66945	10.0352
1076.02	209.142	38.7073	4.17793	73.7282	13.6807	221.799		7.61858	831.49	589.457	245.064	702.63	474.4		203.162	2188.95	853.158
3.68641	63.5701	30.1876	88.6786	125.01	65.5362	2142.54		69.4683	16.8756	144.917	454.125	293.643	804.948		637.872	4.21889	1184.36
3.72737	103.834	194.847	215.204	1052.14	227.165	533.546		16.0154	646.637	777.382	111.534	477.841	302.327		5.85729	3.60449	327.763
1535.23	117.31	458.999	47.9643	806.095	175.104	102.769		276.726	972.843	7171.99	348.243	127.918	305.808		1334.81	712.255	43.2539
3.39969	85.3609	229.499	17.2442	117.801	143.524	15.1552		298.681	1122.31	277.669	294.012	72.2946	4035.14		78.8482	5.40673	63.5291
3.23585	158.516	53.9445	45.5476	82.2479	747.645	1297.74		144.466	108.585	357.705	1254.4	70.4514	415.868		6.02114	10.6087	1347.01
643.442	69.5912	99.9836	149.218	115.753	254.239	1955.68		793.684	490.374	1960.8	283.28	297.452	354.1		3.89121	1856.19	269.149
4.01409	117.023	639.961	17.8996	37.1508	174.941	109.568		34.5294	48.9473	639.469	445.195	277.955	451.176		535.594	3.93217	86.9583
3.64545	60.58	1153.07	17.2442	40.5095	146.432	2460.97		1660.15	809.331	782.379	102.195	39.1169	581.224		8.15106	4.17793	13.5168
4.30081	193.905	1159.62	38.8711	41.1239	45.5067	433.235		45.9572	287.909	29.9828	65.3314	806.3	14.6637		70.9429	3151.84	52.6337
6.84034	166.134	106.291	19.2922	89.4569	178.176	229.008		534.243	63.0786	58.5729	741.255	196.609	60.58		33.9969	3.97313	103.465
8.43778	163.963	34.2017	71.5163	93.5938	299.091	43.7864		164.742	195.994	1208.98	1129.11	93.1023	682.764		1188.83	4.13697	11.305
649.627	415.172	716.146	10.0762	155.689	4.01409	40.0999		31.4574	372.655	715.041	1386.75	288.277	1072.87		3.27681	1085.69	80.5685
5.44769	108.544	11.264	248.3	94.495	154.215	61.4811		83.149	719.833	29.737	192.717	413.902	104.571		3.23585	7.65954	24.5761
6.10306	205.251	1041.41	29.3684	187.556	282.584	353.363		260.793	872.164	5840.83	516.835	815.761	31.1297		225.895	1621.2	19.5789
882.076	196.281	5.48865	89.6207	328.91	40.7553	252.396		32.5633	1292.41	867.125	3.60449	270.296	547.145		5.24289	4.30081	153.027
3.27681	76.8412	1145.08	455.353	157.86	397.764	5.52961		313.591	1207.46	7233.27	7.00418	131.769	677.357		581.142	3.85025	75.8172
3.03105	259.032	94.1673	3.11297	49.4388	18.2272	117.146		440.485	1448.27	1479.97	205.784	212.665	290.039		502.294	510.199	68.4034
3.93217	108.544	882.895	3.89121	151.02	181.658	248.382		300.197	289.096	3894.69	29.3684	255.1	212.255		4.79233	14.2541	263.414
5.03809	184.566	617.965	433.399	370.279	50.0532	489.105		814.533	535.512	135.537	30.4743	105.267	155.116		4.79233	1936.72	6.71746
887.851	1186.2	40.8372	488.367	504.137	400.385	375.276		729.254	1864.83	595.355	50.6267	316.376	334.89		285.123	4.66945	123.986
3.68641	7.78242	112.435	61.4811	1159.87	228.557	985.869		660.236	1648.93	1574.92	1136.07	347.465	385.926		246.416	4.58753	62.1365
3.80929	8.3149	485.377	37.9291	73.1138	87.6956	1551		74.957	47.0632	40.2638	8.88834	146.064	343.205		838.699	1317.52	42.3527
4.95617	11.3459	3.97313	445.687	153.6	138.281	1816.5		234.087	471.819	2006.51	148.931	986.524	157.328		4.75137	1167.49	134.431
33.3415	13.5168	3.48161	2.62145	62.9557	53.9445	364.791		177.111	3042.52		100.352	75.3666	429.549		383.878	4.21889	61.0306
904.112	23.0605	4.46465	3.31777	175.023	13.2301	476.694		251.741	5.93922		480.831	83.3129	167.363		128.779	4.66945	6.43074
414.189	64.0206	5.57057	465.553	93.9215	13.1482	31.7031		71.1887	13.4349		335.914	797.862	182.764		821.701	447.571	58.2862
1417.14	477.144	396.33	557.918	68.2395	683.215	262.39		88.5967	747.727		903.334	916.769	72.2536		3.52257	1346.07	101.745
246.047	161.547	7.82338	33.874	146.719	247.85	422.094		197.837	5.77537		1353.85	5.65249	83.9682		4.13697	3.85025	214.058
962.972	646.146	12.329	128.451	190.178	102.114	232.08		74.7932	659.007		2.86721	11.0592	27.6481		200.459	4.05505	174.859
4.30081	368.354	104.858	116.9	233.022	512.698	8.27394		166.257	12.1652		3.68641	54.3131	470.304		312.321	2796.67	15.1552
4.09601	102.523	896.821	346.031	1643.85	323.872	2630.99		22.2413	438.724		1089.29	204.473	443.844		1390.88	3.76833	31.0478
11.3869	610.838	4.54657	31.7441	117.433	401.778	241.747		16.1383	2075.82		10.4858	145.613	1157.94		35.5943	3.11297	93.0614
82.3708	144.917	4.99713	50.9134	40.1409	211.846	8.19202		21.1764	6.30786		262.472	214.139	243.221		3.48161	4.87425	75.2847
959.613	104.735	36.0039	304.579	48.0052	263.21	14.9914		118.784	2247.07		4.66945	326.575	169.903		3.39969	2496.89	55.6238
54.395	882.649	297.985	47.5547	70.9019	419.554	1003.56		418.244			4.46465	386.5	302.613		710.412	3.76833	46.9403
522.815	195.257	27.9348	19.2922	14.1722	129.925	874.13		452.978			196.117	327.353	243.426		26.5831	3.85025	58.1224
367.371	609.159	1277.83	538.052	30.9658	17.449	9.21602		518.022			515.442	118.375	571.271		1211.56	7.74146	9.17506
418.448	172.196	5.73441	2.86721	43.7044	2.82625	362.087		151.225			225.076	18.432	555.337		3.76833	607.684	38.994
1290.82	231.425	5.73441	4.42369	75.2437	381.38	8.27394		180.593			654.051	338.371	138.199		3.72737	8.43778	45.22
2104.61	517.859	51.1182	10.0352	73.3595	18.432	383.673		53.6987			643.729	157.041	129.311		529	1675.72	116.736
4.13697	184.525	37.97	152.781	61.604	343.778	1331.78		197.469			236.34	387.032	177.972		5.98018	3.60449	101.294
3.68641	264.275	275.129	401.696	37.5195	43.9092	297.247		51.9784			739.617	163.472	43.6635		34.898	3.64545	11.2231
4.95617	98.0995	17.7357	357.909	30.4743	431.269	589.334		277.013			3.52257	220.283	719.014		71.3935	2274.88	46.0392
53.9035	218.194	106.251	40.059	54.3131	343.819	9.95331		487.958			3.76833	93.3481	93.3481		701.36	3.64545	177.316
625.297	261.366	917.302	443.311	172.975	951.094	1383.67		273.163			4.38273	166.134	70.9019		3.97313	3.52257	14.7866
5.98018	280.085	561.194	169.616	176.21	320.39	263.169		152.454			6.30786	54.6408	113.664		272.835	833.006	13.312
1259.15	238.593	7.86434	380.274	149.422	61.645	485.336		555.542			190.505	28.795	39.8132		3.93217	5.07905	181.126
8.3149	157.819	15.5648	42.7623	524.207	201.892	486.77		1559.56			86.262	184.894	562.669		6.79938	2226.18	59.9246
265.626	71.885	17.0804	141.476	113.419	142.869	1725.32		6.43074			95.8876	325.551	545.834		895.92	5.24289	72.0079
627.263	88.1871	959.49	27.6481	209.675	30.802	880.396		4.13697			267.388	628.451	57.1393		5.61153	5.81633	115.794
1617.19	54.5998	4.71041	26.4193	345.007	18.8007	115.671		5.28385			30.3105	438.355	454.289		532.85	1457.97	39.9771
1486.89	120.177	4.87425	358.278	377.243	9.7485	1013.84		6.63554			25.2724	29.4503	136.315		4.79233	1375.32	80.118
2103.63	196.281	9.21602	162.53	558.368	312.812	18.8007		14.2132			27.2385	50.5038	495.372		451.421	3.93217	13.1072
898.992	285.123	15.5239	777.095	94.5359	258.253	911.198		850.086			34.4065	537.929	895.388		6.84034	4.46465	8.76546
729.459	383.346	157.41	108.708	69.7141	315.229	789.178		4.42369			39.0759	222.577	575.899		31.3345	1792.62	50.7496
4.42369	242.238	700.008	7.9053	37.5604	67.9938	1339.03		4.58753			158.188	116.245	222.987		71.3935	4.05505	111.084
53.9035	65.5771	5.69345	17.5309	11.7556	28.795	364.504		347.997			397.6	89.293	156.345		552.593	3.80929	265.135
80.5685	142.05	6.34882	306.095	10.8135	574.465	11.5507		461.416			415.172	77.4965	629.721		4.75137	1862.78	24.1665
2350.7	434.914	9.05218	85.6885	14.1312	538.912	298.353		1060.21			1442.37	106.66	89.2111		271.975	3.64545	91.8735
6.38978	99.0825	16.8346	299.828	21.3812	37.3147	141.968		1059.23			114.934	139.838	920.415		43.0491	3.85025	110.306
6.75842	369.092	1045.63	139.797	26.665	120.832	526.829		4.79233			111.452	316.622	406.652		4.42369	245.392	151.02
596.379	366.06	4.09601	25.8458	143.319	462.399	14.5408		7.41378			200.254	201.319	113.91		50.5857	2754.53	162.12
6.8813	131.031	3.89121	70.9019	40.5095	540.305	136.315		1156.8			447.325	68.6901	33.4234		48.0052	688.498	113.787
10.8544	1425.29	68.0757	28.9998	42.7214	460.187	1174.08		4.13697			245.843	260.22	213.156		89.6207	4.38273	264.479
3118.99	284.959	43.9912	14.8276	39.9361	1295.04	151.47		4.01409			669.78	750.512	38.9121		975.137	2692.76	183.174
2270.66	394.937	567.666	107.152	43.9912	8.97026	8.02818		8.39682			150.119	51.6917	1061.52		4.58753	5.24289	41.4516
4.54657	34.898	420.005	50.1352	24.2484	223.765	1109.81		29.778			48.8244	175.719	3447.82		4.42369	2875.4	115.385
4.95617	25.2724	5.24289	34.6522	13.312	355.902	7.04514		1011.88			90.4809	218.768	381.257		530.229	3513.52	59.6379
123.044	154.952	29.9828	328.5	19.8657	1063.69	1124.11		803.842			97.2393	159.212	129.475		5.12001	4.05505	71.6802
2044.24	128.983	20.9716	49.8484	20.1114	693.782	475.383		4.83329			82.0021	92.6108	956.418		777.095	3.72737	113.91
642.705	431.392	185.304	301.63	26.3783	970.673	34.1198		5.89826			1029.2	71.2296	1657.82		3.68641	2751.7	96.2972
2089.54	12.9844	63.8978	23.7978	31.4983	164.905	147.743		37.3556			79.9132	137.995	187.925		3.85025	5.40673	158.72
362.988	26.2554	3052.1	125.625	32.1537	304.047	186.164		301.384			545.425	22.6919	309.413		271.115	475.67	20.4391
95.437	163.308	5.52961	14.336	19.2922	26.5831	885.885		155.157			212.46	504.383	243.262		861.063	4.01409	121.242
2214.96	73.2776	521.422	7.4957	24.0845	14.0493	11.0592		363.931			474.195	156.877	207.258		4.34177	4.30081	11.0183
3018.68	339.027	49.7665	9.58466	55.1733	928.525	424.592		600.147			6.22594	1064.68	154.583		4.58753	935.856	11.5507
956.746	569.141	861.964	287.95	46.2849	748.874	282.215		3215.29			204.145	298.64	910.379		1453.59	559.761	174.654
303.064	259.114	5.89826	398.173	21.545	1077.54	9.58466		446.916			57.9176	279.88	564.307		4.99713	1760.63	129.598
1049.28	1533.83	352.994	347.546	16.9984	1074.38	16.3021		1399.16			208.733	423.446	180.02		511.715	3.93217	70.6971
755.837	162.489	5.36577	127.181	25.8868	442.902	65.659		361.555			105.308	139.633	518.965		106.537	3.60449	28.5902
5.40673	169.984	11.8375	27.5662	12.2061	267.551	21.3402		134.185			351.274	200.213	479.971		176.989	10.3629	39.6084
257.885	133.981	306.095	60.2114	26.5012	185.631	1012.04		1211.19			255.468	127.918	927.623		1430.61	1056.81	82.5346
199.271	182.109	136.725	369.624	9.95331	211.764	1064.72		10.3219			529.123	27.73	231.875		1178.34	4.95617	59.2283
1143.28	179.2	575.694	33.7921	7.86434	762.718	13.9674		1064.76			378.471	242.771	224.093		3.48161	4.99713	103.834
1501.27	100.147	37.2737	292.947	46.6126	287.048	267.838		191.734			489.391	470.181	488.531		389.203	649.422	304.252
1282.22	192.84	436.84	20.2753	53.9445	12.9434	8.27394		222.454			422.995	313.877	883.632		235.725	1363.6	20.3572
460.76	251.044	621.488	49.7665	80.118	77.6194	60.58		568.199			171.991	281.273	340.338		5.89826	897.641	9.25698
2823.99	142.705	268.985	109.937	101.171	592.242	58.9416		205.784			153.723	316.54	1328.13		4.13697	3.76833	47.8004
1173.34	245.105	223.847	36.6593	34.6932	19.456	39.3217		55.1733			477.718	243.385	679.979		60.9896	3.72737	71.0658
238.347	86.6306	715.286	869.255	45.5886	10.7725	120.996		138.65			43.0491	337.02	503.482		25.3953	6.34882	63.0786
81.7154	217.007	4.87425	180.552	92.0374	113.009	88.7605		1902.19			180.798	46.0801	82.0021		957.156	830.343	111.084
130.868	468.174	9.5437	6.43074	85.8933	290.489	3579.42		392.111			65.4542	70.0418	43.6635		3.89121	4.99713	198.288
2463.26	379.454	438.191	29.0407	49.9304	160.523	144.057		239.248			120.668	42.1889	262.022		3.89121	556.853	913.738
88.3509	131.113	425.084	311.952	32.891	335.013	7.20898		186.696			32.6862	669.78	113.378		253.994	3139.31	1702.14
159.785	92.1602	6.59458	99.9017	117.637	61.1944	152.249		243.876			50.299	934.423	181.576		251.004	9.58466	277.464
702.834	194.929	1208.81	2725.53	106.087	32.891	207.504		279.184			85.5657	19.7428	282.584		31.4164	858.442	1366.02
71.5983	142.418	59.7198	49.5208	103.793	681.044	19.7837		449.742			78.6434	17.8586	244.04		95.3142	3.89121	974.359
171.951	199.558	771.647	381.83	147.989	263.619	163.595		153.6			91.7916	12.0423	195.871		821.373	3.68641	278.938
252.109	73.2367	4.71041	13.5578	116.613	99.2054	1512.53		486.074			61.604	148.235	137.462		3.76833	2838.17	168.919
108.462	427.664	4.50561	52.1832	97.8947	21.7498	9.29794		812.976			66.0277	229.991	37.1508		3.60449	4.25985	71.6392
287.007	166.011	15.401	11.6736	64.3893	44.5236	1147.46		227.288			39.4446	480.995	15.1552		291.595	12.6976	108.708
133.038	57.9585	372.041	11.3869	124.642	13.7216	163.144		62.8738			30.5562	345.294	115.999		48.9064	2386.34	95.9286
97.1574	42.7623	633.981	47.8824	90.8086	17.6948	9.05218		140.78			44.6875	165.11	174.736		354.018	8.5197	181.044
419.718	63.4472	22.5281	10.6906	212.583	148.48	168.469		290.53			56.2382	61.604	14.7047		272.794	340.583	237.241
110.469	224.134	85.6476	26.8698	255.427	4.71041	14.5818		107.52			51.6507	133.079	274.064		118.702	1044.97	32.0718
354.182	157.205	684.648	248.833	344.311	20.0705	22.4052		43.7044			177.767	834.357	28.9588		454.37	5.24289	160.195
78.07	132.793	45.4248	27.1975	212.542	328.377	127.918		149.259			118.702	150.446	290.653		734.865	4.50561	237.118
908.413	101.458	282.87	36.3726	271.934	9.25698	228.844		54.436			99.0825	440.772	153.764		4.17793	1153.31	123.945
282.092	126.812	487.016	195.134	432.498	1259.56	12.329		65.7819			193.086	357.336	1480.46		4.71041	4.38273	129.516
311.133	227.247	7.53666	304.62	50.8315	704.555	1822.36		398.91			152.372	2021.91	374.867		263.046	4.75137	195.912
1162	277.341	8.7245	27.1156	38.9121	248.587	1769.15		253.748			35.8401	4.66945	652.372		1045.1	897.19	214.959
154.051	561.031	19.6199	10.7315	46.4078	340.256	328.582		342.14			53.3301	4.99713	767.06		4.87425	5.20193	51.4049
288.441	287.499	43.3768	60.2523	75.8991	273.081	59.515		234.66			512.902	7.37282	45.138		491.726	5.12001	55.2552
246.703	105.022	1010.69	50.3809	25.7229	63.3243	220.98		87.0402			176.047	11.5507	39.8951		83.0671	814.574	147.456
616.327	86.4668	4.95617	15.2781	29.6961	6.55362	367.781		127.755			222.782	1266.12	601.622		309.167	5.65249	69.5093
101.049	219.628	4.87425	17.9405	39.1169	4.46465	182.068		27.689			53.2481	14.418	744.819		1397.44	1663.88	13.7216
98.2223	366.142	27.0746	43.3768	28.0986	177.562	644.548		7.16802			99.0006	24.7809	721.348		5.28385	4.66945	12.9024
18.9645	297.739	90.317	24.2074	28.5082	143.77	729.95		137.954			46.244	154.911	48.1691		62.9966	3.89121	37.3556
548.333	241.747	584.951	38.9121	75.6943	292.373	45.5886		51.9784			144.753	160.482	375.604		44.9742	1593.39	111.248
275.989	80.8962	4.91521	37.0279	30.7201	21.7089	186.287		211.19			139.06	427.173	489.227		60.3752	4.91521	41.8203
620.505	767.756	289.178	2316.09	12.6976	129.352	342.426		246.621			124.191	484.968	470.304		1342.43	4.62849	66.2734
322.602	5.85729	41.4107	175.719	34.939	548.005	1352.3		750.102			90.4809	341.157	302.9		3.31777	421.725	146.555
242.893	6.02114	79.6674	24.0845	13.9264	158.557	16.2612		40.9601			112.886	216.884	68.6491		3.11297	5.07905	50.9544
165.847	8.56066	520.275	7.4957	16.0973	133.366	377.447		2554.35			64.3893	382.567	253.871		419.882	5.77537	54.7637
155.075	17.5309	5.57057	79.4626	62.669	218.645	142.173		4.46465			51.7736	332.924	262.554		35.922	290.161	469.403
249.037	28.1396	484.681	359.179	47.186	306.873	201.278		4.79233			84.0911	435.406	140.862		1622.35	1073.69	196.076
683.419	66.0686	7.37282	336.201	31.5393	56.1973	1396.29		6.0621			369.337	38.5435	240.354		285.205	4.38273	257.68
143.934	582.412	416.81	4.75137	49.9713	627.222	574.588		400.754			109.609	458.098	50.6267		11.1821	4.58753	104.203
82.3708	491.316	99.4102	176.333	80.5276	187.802	52.7157		443.803			85.8933	142.132	767.469		1582.29	895.06	326.944
130.949	70.6152	113.992	5043.99	40.3457	68.9768	1838.21		24.3713			65.3314	7.00418	184.73		4.50561	3.68641	19.0464
140.043	78.7663	873.761	487.712	73.0319	14.5408	247.112		1212.26			202.793	7.86434	542.476		4.54657	12.6157	90.2761
2211.72	146.719	221.021	18.8007	35.5124	183.706	26.2145		4.25985			92.406	10.9363	132.547		44.6056	1432.83	213.648
504.055	196.158	140.493	17.0804	68.5672	352.626	1215.41		4.34177			213.648	11.6736	155.239		5.73441	4.09601	178.258
96.3791	89.4569	1037.6	22.5281	34.2836	455.231	175.883		5.73441			508.151	11.1411	42.1479		1821.17	7.9053	361.473
123.208	164.25	583.231	41.3697	18.6778	39.035	140.657		772.999			66.4783	27.4023	38.9531		3.52257	736.135	1664.78
1608.09	176.292	80.9372	26.1735	9.21602	195.134	819.571		680.511			137.708	842.181	261.571		3.44065	380.97	79.7903
1100.76	263.333	1038.58	7.53666	17.449	110.756	199.558		234.783			153.232	106.988	53.2072		1048.66	743.958	108.872
29.5322	57.6309	280.945	199.148	17.6948	91.0543	511.469		177.931			266.241	375.195	188.13		3.48161	577.824	26.6241
152.331	60.621	164.578	195.912	17.49	270.664	1134.47		2515.07			115.139	133.12	38.2567		3.56353	15.36	253.174
144.057	228.23	481.445	28.0577	19.0464	9.70754	24.4941		80.1589			32.4404	160.318	24.5351		74.5064	1100.39	104.08
171.705	107.193	12.7796	11.7965	45.9572	218.891	74.3016		31.7031			116.368	456.418	869.01		468.543	4.42369	113.5
965.839	99.9836	714.754	56.3611	37.6423	243.303	948.431		160.973			55.0504	730.974	1411.2		410.174	5.16097	69.9599
115.344	79.2168	23.634	3.97313	194.151	200.254	8.3149		153.723			131.892	479.397	563.324		678.217	727.943	116.491
379.372	343.942	275.866	187.679	152.986	21.5041	493.487		71.3525			135.25	777.628	82.6575		3.60449	5.52961	202.097
430.368	126.812	6.59458	74.957	516.876	634.636	12.4109		255.714			60.58	1462.36	825.264		3.80929	963.013	133.899
181.904	125.788	7.7005	178.996	404.85	257.107	130.007		21.6679			75.7762	6.0621	113.091		272.467	5.77537	155.566
97.7308	205.743	18.3501	13.4349	182.764	338.986	72.5813		14.5408			1009.75	9.66658	1408.29		534.529	7.65954	209.839
641.108	183.092	110.428	43.7044	180.306	203.613	101.95		48.3739			25.1905	13.312	458.385		22.7329	1577.09	140.288
207.586	72.5813	624.928	92.0374	177.03	266.896	53.2072		188.089			55.3781	85.238	744.696		5.89826	4.13697	173.876
1379.25	206.889	33.7102	7.98722	216.802	237.528	557.303		98.6319			214.344	147.866	88.4329		433.645	8.23298	92.3241
207.34	197.182	472.966	52.2241	238.511	510.65	623.085		157.205			522.118	23.9617	256.042		174.408	1035.39	31.2526
270.869	103.506	52.1422	34.4065	158.352	269.845	671.541		156.345			322.807	164.209	46.8993		1346.73	4.71041	277.955
127.673	63.652	229.827	1186.57	374.662	663.431	540.469		124.478			189.809	350.537	236.749		260.22	4.01409	147.825
112.231	193.496	61.1944	2813.8	45.179	48.4968	695.134		243.59			135.988	471.123	62.587		5.61153	561.891	82.2479
282.133	350.578	486.237	2966.04	73.4415	284.099	230.933		437.372			210.084	164.66	169.575		196.486	204.145	50.7496
303.228	122.348	6.0621	1072.54	172.196	172.77	628.41		674.326			59.597	1626.12	730.401		279.962	1426.56	26.7879
137.544	117.515	7.74146	591.587	106.251	631.4	910.297		388.752			40.9601	17.408	487.507		244.86	373.188	36.9051
3428.4	139.633	190.587	1309.62	83.5586	458.876	8.06914		376.423			88.0233	13.8036	454.452		378.062	650.733	584.46
2414.23	488.777	168.305	18.473	83.6815	895.347	20.6029		75.8991			59.0235	103.998	479.971		60.539	1360.37	734.701
189.522	174.203	141.845	43.8683	52.347	177.726	114.238		29.5322			62.587	440.649	33.7511		11.4688	5.85729	118.866
1237.24	94.3721	64.8808	18.1453	40.8782	322.028	19.2103		717.99			89.2111	14.6637	147.579		13.5578	18.6778	128.615
184.239	97.6899	327.968	367.207	62.0546	49.1112	278.324		91.8735			94.8226	9.42082	97.8537		24.6989	2036.99	93.3481
161.629	106.046	1439.13	112.968	167.65	846.482	1337.96		65.2494			88.0642	13.1892	101.13		10.4039	5.44769	92.5289
398.951	132.997	1278.32	37.7652	166.257	1065.25	1685.43		216.146			59.4331	130.622	507.373		15.4829	359.179	78.4386
134.964	125.788	126.403	20.7668	359.916	735.889	165.97		899.73			136.643	303.555	45.6705		95.0684	71.2706	26.5421
348.243	112.927	541.083	11.305	606.783	283.69	12.0423		179.774			172.278	466.085	649.054		27.5662	115.139	96.9935
179.119	225.977	103.219	368.641	365.118	605.882	1041.86		72.9909			375.727	4.30081	136.029		64.0616	427.869	22.9377
198.247	131.81	694.888	134.267	399.279	591.669	74.6703		25.9687			129.393	4.83329	625.338		48.1691	822.315	134.677
140.903	119.235	449.824	3806.42	1672.73	46.0392	42.2299		33.1777			274.556	5.32481	166.503		124.396	429.835	118.498
153.314	88.0233	163.595	402.966	8.06914	527.198	660.154		70.3695			105.308	8.1101	1000.2		50.1761	505.407	64.1026
122.594	61.4402	1755.3	485.992	26.1325	18.473	161.956		196.527			238.142	8.97026	761.039		91.0543	331.162	77.9061
131.892	39.9361	154.665	26.8698	122.43	10.1171	484.312		46.5716			58.1633	1689.85	132.752		67.5432	773.368	140.903
256.205	282.952	396.494	17.7767	469.444	393.627	1635.54		21.1354			31.0887	4.42369	1659.83		54.9275	10.24	148.235
273.532	55.0094	50.9953	54.6817	444.909	3.44065	118.252		9.70754			274.801	4.30081	907.225		115.344	680.429	39.9771
987.057	122.307	1567.63	1372.78	371.426	108.299	5.98018		9.62562			325.879	5.61153	41.5745		40.7553	4.91521	38.2977
1473.7	171.131	562.423	2012.86	89.6617	5.61153	2121.57		11.6327			64.3483	7.74146	1020.28		129.803	4.58753	23.7159
3913.74	320.963	1270.05	587.491	59.4741	15.1143	10.8954		20.3162			111.33	14.7456	282.584		100.885	482.674	129.884
881.666	105.636	8.84738	429.016	93.0614	697.551	548.62		8.39682			92.406	1432.42	232.08		159.048	262.554	74.6703
10.8544	135.988	27.9348	3136.85	80.4866	107.848	770.582		11.1411			122.798	4.42369	458.63		31.7031	489.514	100.311
208.036	144.589	25.1905	1164.45	61.2354	439.297	70.9019		132.424			288.441	4.71041	321.496		46.8174	656.304	122.43
509.421	224.707	263.087	86.1801	235.193	175.965	226.591		95.519			196.813	865.282	167.568		97.7308	221.717	85.3199
583.641	113.419	1022.53	506.185	1212.17	15.8516	111.248		28.5492			79.4216	4.13697	210.822		109.036	197.305	104.735
5.93922	156.14	14.377	326.78	84.6236	4.38273	3822.23		187.27			55.8696	4.58753	489.596		1492.46	953.715	170.353
29.8599	111.903	328.5	70.0008	185.344	5.03809	378.471		432.58			37.3966	5.40673	391.661		313.14	12.1652	1958.79
38.6254	434.669	262.39	249.816	206.562	1111.45	990.211		120.546			52.5928	6.59458	1028.18		64.3074	137.175	80.5685
56.2792	646.309	576.554	83.6405	137.012	7.16802	12.6157		248.996			45.8344	1022.16	192.963		101.54	107.356	28.795
2647.58	301.835	10.7315	6.92226	576.35	473.786	623.044		593.143			85.9753	3.85025	617.719		154.01	28.8769	46.4078
4.13697	252.068	113.5	12.6976	169.943	966.003	2309.9		555.419			62.2594	3.85025	109.282		134.677	12.4109	104.162
3.97313	251.085	235.439	23.6749	160.646	7.45474	17.6128		501.229			47.1451	5.16097	252.028		119.89	350.659	216.597
6.14402	96.8297	59.6379	41.7383	107.52	733.595	266.691		28.8359			89.6207	10.5267	238.101		1305.56	222.905	255.345
188.253	216.884	223.847	1094.62	478.742	7.37282	1558.25		55.0913			44.6875	99.1644	571.066		73.2367	2764.19	126.362
2486.16	155.607	3250.35	485.091	395.716	86.1801	900.385		977.472			69.5093	969.853	164.742		28.6721	121.856	264.275
231.793	155.28	117.842	2295.69	1065.45	767.961	471.41		3.52257			36.8231	6.43074	830.425		34.857	3459.57	48.8654
132.506	668.51	55.8286	104.612	167.035	20.8897	1872.74		3.72737			21.5041	6.2669	80.4866		42.8443	7819.24	16.8346
170.722	174.408	464.447	17.7767	153.396	98.0585	394.692		4.71041			94.7407	8.64258	174.408		69.5503	3212.13	466.945
151.921	201.278	60.7848	507.987	170.189	471.246	822.889		8.15106			100.025	14.418	194.97		9.42082	2504.75	45.7115
1366.84	148.357	638.24	42.7623	41.6974	73.3595	180.675		15.2781			583.641	21.0945	245.638		18.8007	235.193	22.7329
769.067	111.33	5.77537	24.0026	33.4234	513.885	1106.91		571.885			68.1576	77.1688	391.661		7.20898	4417.42	123.167
1103.3	78.6024	5.65249	21.3812	123.454	94.0854	369.296		325.961			53.9854	151.716	88.4329		48.7425	1992.01	246.867
41.4926	322.069	11.4279	55.7467	54.5179	8.47874	8.47874		924.961			166.421	182.641	137.462		6.2669	2875.65	61.8088
1126.53	1518.47	1634.8	6.71746	36.8231	65.9867	322.561		603.67			137.462	305.972	92.5698		243.18	3618.13	80.5685
4.75137	4.50561	3.93217	705.947	19.7837	192.553	7.37282		5.93922			78.6434	59.6379	330.835		7.53666	3597.2	221.881
25.2724	3.93217	3.76833	34.6113	44.4417	6.10306	456.91		7.12706			64.8808	304.415	1044.61		34.0788	285.697	245.965
71.2706	4.91521	5.24289	2384.53	19.3741	58.6958	1607.52		115.835			45.7934	207.135	554.19		130.212	3580.49	104.53
584.337	78.3976	16.7117	14.377	31.6622	374.58	23.9617		32.3175			68.1986	353.117	1259.15		41.1649		78.4386
3.97313	116.327	298.599	27.9348	24.5351	226.755	86.3029		1427.99			105.145	93.2662	612.763		76.8821		90.2351
4.38273	85.8524	4.87425	121.979	78.9711	203.94	2082.37		157.696			57.508	127.345	565.454		216.187		94.495
26.0097	214.058	4.21889	25.5591	56.8936	814.86	7.00418		94.6178			111.739	566.806	662.448		452.691		37.3556
357.336	262.964	120.914	6.96322	11.6327	659.908	103.916		379.332			290.94	159.253	290.489		857.664		9.5437
328.336	288.031	187.188	47.7595	47.9643	570.124	371.795		1932.54			69.837	102.195	1663.31		61.4402		223.355
1706.64	136.602	1730.81	790.366	12.9844	22.6509	701.278		594.208			46.5307	99.6969	147.907		68.1167		70.0008
138.404	196.813	356.189	19.7837	10.0352	908.413	877.693		206.603			165.11	267.183	450.438		86.1801		33.5054
1592.69	259.441	371.918	32.891	10.4039	3.68641	923.978		128.082			96.0924	181.412	512.616		16.1792		554.395
5.93922	143.852	127.222	31.2116	112.64	8.56066	45.0971		80.6914			63.611	328.459	457.77		15.5239		110.551
7.20898	112.231	239.412	39.5675	22.1185	477.308	749.57		147.415			255.673	62.0136	216.187		57.9176		98.1814
36.2087	406.652	170.517	1610.35	14.1722	31.7441	1556.69		44.6465			101.253	483.78	1085.73		94.2492		141.271
107.684	92.406	232.612	539.076	13.1072	723.314	224.625		37.2327			185.672	374.539	333.743		136.192		31.5393
213.279	191.734	22.1185	262.513	22.7329	34.6522	13.7626		35.8401			85.9343	199.271	1056.36		54.5589		21.6269
777.75	312.075	52.0603	497.256	31.826	5.44769	2197.26		107.93			165.028	1103.47	946.834		16.9984		239.78
6.8813	210.617	155.116	22.2823	35.3486	107.848	744.819		285.041			92.3241	5.52961	923.568		425.207		349.963
265.299	315.311	23.3473	14.6228	24.0436	392.521	313.345		187.392			127.55	5.48865	522.241		90.9724		34.8161
563.652	415.581	45.8344	18.8416	91.0543	106.373	9.09314		2358.32			242.812	8.64258	916.155		777.013		17.7767
5.57057	74.0968	317.482	8.47874	57.1803	292.537	921.439		449.619			280.495	20.0295	374.785		167.281		13.1482
38.7073	80.5685	203.531	15.8106	32.891	712.911	155.894		81.7154			75.5304	33.9559	68.5672		68.4034		320.677
106.251	149.668	74.957	31.6622	51.4049	12.9024	456.746		294.053			80.3637	857.336	165.684		47.1041		196.609
1469.36	32.1537	227.288	7.94626	113.5	267.633	259.687		307.119			87.0812	6.96322	710.494		85.5657		206.603
133.407	137.298	474.236	129.598	98.5091	490.989	755.919		631.195			108.094	5.57057	562.096		40.3457		232.531
1567.95	203.08	534.816	53.9854	37.1918	24.0436	660.523		1140.82			79.9951	9.5437	413.042		118.416		89.7845
5.32481	185.754	356.066	9.66658	53.0024	646.391	1402.39		202.507			33.0548	10.1171	77.5375		208.61		392.357
5.44769	120.341	377.734	451.053	75.3256	6.0621	653.314		83.149			36.4545	33.0548	261.244		1996.03		167.732
164.783	160.031	192.349	3.44065	192.144	202.384	1707.91		158.638			80.6095	121.856	205.374		3.27681		315.434
1964.49	261.203	655.239	1045.71	123.495	304.088	6.79938		321.332			38.4206	194.601	100.475		3.27681		28.0986
3.56353	691.898	293.274	426.231	185.549	608.79	1224.5		168.428			81.9202	345.867	224.83		213.156		271.238
3.48161	116.572	11.5098	2149.55	89.1292	3.80929	7.00418		77.988			212.05	306.218	141.312		4.75137		98.2633
1336.94	380.806	103.424	24.7399	66.0277	15.4829	16.8756		69.1816			43.7044	242.279	739.248		119.194		91.382
12.5748	262.513	219.669	8.43778	72.2127	6.10306	1165.52		68.1986			72.4175	1537.85	1162.37		6.51266		32.1946
45.4248	70.4923	616.777	8.47874	85.238	251.618	233.022		83.8453			78.6024	5.73441	731.547		96.4201		91.0543
396.903	116.286	41.6974	32.1946	51.9374	357.459	9.99427		18.7188			69.0997	6.0621	46.8584		87.7775		47.8414
1087.25	176.866	995.617	376.423	98.8367	342.959	46.6126		35.1028			31.3754	19.2103	92.2012		161.342		118.211
3.68641	158.638	1403.09	3.44065	171.951	7.41378	22.4052		27.2794			190.915	55.2961	240.723		555.788		135.824
3.80929	70.9839	36.1678	5.28385	161.751	246.088	109.445		9.42082			389.285	1468.42	342.959		1878.1		88.8425
1544.65	73.8511	909.929	218.399	180.757	848.898	1059.6		303.432			60.58	3.97313	120.914		4.05505		37.8471
3.35873	90.4809	142.377	563.652	396.125	114.811	8.35586		95.8876			135.701	4.30081	38.5025		16.0564		30.3514
3.03105	25.9277	844.474	4.79233	470.263	57.3441	370.73		631.932			162.407	5.52961	205.947		5.85729		61.7678
3.93217	205.128	6.18498	208.323	438.273	705.128	111.944		434.792			106.128	16.8346	148.235		34.5294		40.5505
5.03809	102.155	11.8375	28.2215	397.149	3.07201	11.5507		355.657			46.7764	334.767	582.739		182.272		215.696
690.792	36.9051	16.7936	19.9476	76.1039	3.39969	35.8401		207.463			27.8119	410.666	94.7817		57.6718		371.18
4.95617	288.277	255.673	10.1171	107.807	777.177	1596.95		1152.49			124.15	30.8839	31.0068		345.376		16.6708
5.36577	108.831	741.378	10.1991	74.0149	374.252	454.166		966.904			86.8354	203.203	351.97		123.822		549.357
584.337	243.426	283.608	35.8401	61.0306	68.8949	115.753		15.6058			212.378	355.083	35.1438		1130.09		1149.91
3.60449	257.598	118.498	3.68641	43.2539	432.293	8.06914		666.544			54.5179	198.779	105.636		6.0621		558.163
3.64545	843.123	849.103	688.416	169.575	70.82	481.035		806.464			181.412	158.843	82.0021		287.335		71.9669
4.50561	4.17793	836.979	373.31	138.65	6.22594	166.994		1454.7			56.8936	367.003	25.8868		126.649		168.96
112.435	4.05505	283.403	6.22594	2142.79	71.0658	30.0238		93.6758			58.7368	594.167	436.02		1901.12		2.82625
62.3003	7.0861	483.698	1726.14	218.317	3.85025	369.993		193.741			99.2463	1087.12	262.882		3.15393		373.188
389.039	16.0564	598.714	125.297	222.536	93.7167	462.153		464.651			45.138	10.7315	264.111		3.07201		299.828
512.943	38.7892	283.403	18.6778	402.105	426.845	295.036		276.931			294.503	29.9009	430.204		4.46465		862.988
859.261	68.5672	258.376	1060.33	1250.02	507.045	36.946		1399.28			179.159	58.2862	144.098		197.755		126.198
45.7934	227.82	847.915	165.766	449.578	4.71041	448.595		140.616			50.5448	60.1704	230.155		4.54657		144.835
1729.25	604.407	1301.55	42.5985	121.897	149.463	38.8711		679.037			117.146	120.095	497.665		154.952		51.6917
4.62849	4.38273	938.191	7.78242	335.299	3.72737	677.152		1761.33			135.865	2504.59	305.03		6.34882		599.246
4.17793	4.34177	3.93217	37.3966	475.137	76.6364	982.674		7.82338			359.138	3.80929	379.946		24.1665		34.9799
136.52	22.3233	3.68641	25.4772	132.711	420.578	139.06		11.8375			176.948	4.13697	176.415		299.091		109.404
195.707	18.9236	5.24289	12.1652	73.1138	4.99713	23.7569		487.958			237.036	5.36577	532.358		1015.56		329.073
32.85	21.9137	8.15106	31.2935	64.5941	97.0345	179.119		8.84738			413.369	38.9531	184.28		6.79938		107.193
197.346	142.132	10.0762	33.3825	119.767	505.161	26.9108		31.0478			158.598	453.961	376.874		251.208		44.8923
641.681	218.768	280.577	19.1693	141.108	121.037	500.123		656.304			101.745	152.413	43.5816		4.34177		176.333
655.157	95.9695	5.12001	374.375	199.64	625.788	670.148		1361.51			135.127	72.5813	561.072		86.0162		314.942
142.377	77.4146	6.0621	3.48161	331.613	5.98018	332.309		700.049			110.838	738.306	71.0658		110.183		660.359
401.327	154.379	933.276	223.069	1985.91	17.5719	163.472		4.62849			78.8482	1406.32	213.238		80.4866		219.505
53.6168	140.452	63.3653	203.736	15.4829	79.7903	1934.34		9.66658			25.8458	263.537	75.981		17.6948		1293.6
176.538	85.2789	232.039	232.776	400.877	335.136	10.9363		20.6029			106.21	6.55362	281.601		1704.31		246.539
687.761	96.461	547.923	168.592	1782.58	982.264	362.579		25.9277			59.3512	9.58466	41.3287		253.83		89.0063
10.4039	75.7762	36.5364	825.715	3.31777	330.016	507.168		36.2907			187.433	15.7696	20.521		23.593		93.7577
33.915	103.301	324.117	6.84034	4.25985	4.99713	1375.03		368.354			312.321	173.097	111.33		60.4162		40.059
46.4488	58.7368	685.959	62.587	6.10306	6.34882	1061.32		3045.47			70.0008	267.183	249.98		85.9753		21.4221
49.0702	84.8693	1313.63	59.4331	464.242	490.989	7.7005		3.03105			63.2834	120.095	27.6481		40.7963		75.94
2695.54	23.8797	1052.8	18.473	7.16802	619.481	311.256		3.19489			38.2567	146.678	474.318		98.6319		13.8855
88.5148	140.411	344.802	7.0861	31.9489	116.695	186.45		3.56353			52.1013	334.071	105.759		52.8795		67.8299
1096.99	76.6773	414.803	7.24994	2315.76	875.973	52.5928		4.66945			60.7029	471.738	492.259		147.17		27.0337
40.5505	427.091	104.08	4.09601	514.131	585.77	38.7483		5.85729			25.641	501.024	326.534		18.6778		54.1902
91.6687	157	71.0658	14.1312	50.1352	3.97313	2.62145		7.94626			44.9742	1377.86	245.884		469.608		237.405
871.59	197.796	1241.79	75.0799	242.893	140.78	182.068		184.73			118.211	5.81633	357.746		867.986		140.78
1422.26	346.973	1360.12	96.461	1217.42	488.941	23.1425		148.398			91.4639	14.4589	646.555		87.4908		90.8495
1469.57	306.3	516.343	47.3089	11.8784	24.5351	171.787		312.608			53.0024	10.3219	300.156		36.3726		108.135
7.53666	281.109	703.981	33.3415	325.51	352.748	658.966		476.899			60.7848	254.485	438.519		39.6084		10.4039
4.91521	175.514	11.9604	7.20898	654.624	304.579	393.053		393.913			43.7044	190.219	93.471		17.6538		158.065
25.5181	184.607	81.9202	28.3034	1887.11	639.51	5.61153		989.309			132.752	11.0592	115.958		5.52961		28.2625
99.7788	1185.96	399.156	16.5479	1972.97	94.0444	11.6327		867.535			418.162	132.137	182.969		65.1266		233.432
713.484	277.955	537.274	440.116	20.3572	4.05505	933.972		14.2541			109.486	140.493	264.234		37.6423		14.4589
2937.13	191.366	100.352	2.99009	72.9909	211.764	125.092		60.4162			50.3809	445.933	105.882		102.195		28.3034
150.528	1078.36	300.606	3.60449	950.233	64.7579	219.997		303.064			38.0519	430.941	89.1292		66.724		55.1733
297.247	106.496	122.225	317.4	621.037	3.56353	55.419		135.373			281.519	151.511	262.431		136.725		38.9121
1979.03	122.798	89.6617	1005.9	133.325	4.54657	5.57057		16.3021			225.24	132.629	254.69		190.669		46.3259
467.478	138.814	174.613	25.5181	1427.71	289.424	6.71746		408.413			119.194	233.227	704.678		645.326		82.2889
698.575	115.098	24.7399	424.429	5.28385	16.0154	292.906		78.1519			151.102	216.024	225.895		7.74146		172.073
1258.95	179.979	381.666	3.35873	5.12001	1220.08	1650.53		130.827			145.572	142.951	238.183		310.15		94.3721
3.44065	395.47	266.323	114.565	889.285	1038.71	347.465		1075.57			370.607	87.6546	183.419		602.933		160.072
3.39969	322.274	230.401	929.467	6.84034	794.094	5.73441		2990.05			299.91	174.49	346.686		164.25		12.288
3056.2	635.947	124.846	490.62	7.9053	455.886	14.2132		472.884			667.977	305.89	316.499		20.8487		145.9
3.48161	110.633	40.8372	13.5988	21.9546	5.03809	614.074		89.0473			190.178	62.587	378.43		34.0788		55.6238
566.888	222.536	374.498	535.226	123.781	76.4316	10.8954		125.829			162.079	367.248	334.808		106.906		49.6436
3.48161	203.039	248.546	204.145	137.79	777.669	369.173		465.02			144.671	159.744	72.5813		311.706		13.8445
3.19489	123.577	243.262	495.863	1274.92	48.7835	7.4957		75.4485			139.019	221.144	102.155		33.0958		73.3595
4.25985	150.201	182.641	20.9716	114.688	167.404	69.837		18.3092			56.9755	279.717	112.476		822.766		10.7725
284.673	277.955	192.881	10.3219	210.658	3.85025	268.944		17.6128			113.419	973.499	76.3906		42.6804		82.2479
767.224	81.4287	124.724	642.541	685.058	5.40673	45.5886		155.853			612.272	5.69345	56.8526		18.5549		181.371
3.80929	139.06	36.2497	293.438	9.09314	376.341	19.2922		104.203			208.774	9.1341	589.088		61.1534		224.338
3.76833	44.7284	382.854	3.39969	31.1706	6.59458	1497.26		1244.04			63.3243	11.1821	327.804		876.874		451.626
654.583	95.519	465.143	847.956	778.611	12.0013	9.46178		391.005			82.9033	1194.4	89.4159		3.97313		1038.75
3.85025	76.1448	57.508	474.318	6.6765	4.21889	643.319		344.393			56.0744	3.93217	72.3355		4.05505		4.21889
3.97313	94.413	236.586	21.586	1488.98	5.85729	8.1101		129.966			37.1508	4.17793	96.502		264.397		5.28385
4.75137	24.1255	157.492	523.224	1507.41	2.21185	117.842		609.241			41.9022	2592.04	183.256		50.9544		533.178
6.79938	26.7469	681.003	195.707	37.0279	836.446	52.0603		162.366			38.4615	4.13697	102.4		214.098		185.959
95.478	117.678	677.398	586.59	67.2565	3.52257	168.756		168.756			168.674	4.09601	315.188		179.241		420.947
104.039	130.868	220.693	34.2426	227.492	233.145	220.734		333.251			128.738	6.55362	267.551		41.6155		57.7128
1432.58	94.6998	760.793	610.961	178.095	531.212	46.3259		142.992			95.1503	48.8244	74.3426		290.899		217.416
4.99713	43.7044	211.354	22.1185	2045.18	5.57057	2274.23		346.154			160.973	189.973	315.352		1499.39		31.4574
450.643	109.773	147.989	30.2286	7.94626	9.91235	131.4		1380.64			715.204	450.315	234.251		8.5197		37.5604
6.8813	90.0713	470.55	10.281	4.87425	103.957	91.4639		145.859			564.348	316.376	458.589		243.426		48.4148
1000.04	276.931	184.976	74.0559	15.1962	22.5281	6.43074		2734.58			240.968	235.316	231.015		242.197		60.7848
10.0762	68.1986	68.6901	569.304	52.7157	865.897	11.5507		5.77537			273.286	128.738	151.225		9.91235		118.825
36.0449	131.892	470.754	2.90817	870.361	9.05218	56.0334		3.39969			121.733	215.737	238.388		101.09		36.9051
140.411	75.3256	3206.03	3.89121	306.955	744.163	115.712		4.30081			154.993	400.016	222.905		10.7315		42.7214
196.199	46.7764	680.757	553.822	1776.85	1331.9	229.704		8.27394			61.7269	118.907	244.163		37.4375		158.024
785.656	133.407	6.8813	2.70337	7.00418	727.861	213.976		334.275			79.9951	343.123	227.451		35.1847		48.21
57.8357	42.5166	26.5012	3.07201	273.695	557.262	51.7736		4.79233			65.3314	187.597	90.4809		71.1067		69.4683
104.94	64.676	23.3063	6.18498	142.992	500.819	36.4135		5.36577			170.476	61.604	228.394		59.1464		236.176
835.381	141.149	45.138	214.836	680.061	1206.36	581.347		9.17506			68.7311	132.834	52.7566		53.8216		209.47
1104.65	82.9852	640.002	388.793	1409.48	19.1284	1096.91		5.69345			172.975	128.205	439.748		39.8542		23.634
146.228	153.355	346.154	193.291	39.1988	481.691	122.553		18.3092			382.322	146.719	55.9515		107.766		60.4981
491.439	43.0081	15.5239	536.414	2555.17	3.72737	9.91235		9.58466			103.998	405.792	266.773		24.4532		56.1153
1516.96	289.998	100.188	512.411	7.2909	110.674	5.16097		15.401			178.217	425.985	150.283		193.987		227.902
632.916	219.505	1169.41	327.804	4.09601	461.416	187.925		375.563			142.173	650.815	248.505		144.753		250.84
4.54657	983.698	280.945	53.8216	5.16097	4.01409	315.106		271.32			93.1842	318.792	502.58		125.707		807.692
4.13697	589.293	27.1975	15.5239	797.043	4.50561	719.833		2569.06			44.2369	1609.32	350.086		3.68641		20.7668
5.81633	5.93922	982.633	20.3162	594.946	13.7626	784.714		4.17793			174.572	1023.14	328.172		1220.16		190.424
38.7483	8.76546	1155.94	568.321	83.8044	9.5437	296.387		4.38273			54.9275	2507.29	328.5		6.10306		616.941
98.6729	62.3413	7.24994	2.99009	45.138	33.5054	486.483		4.38273			5.20193	4.50561	139.06		11.1002		215.86
896.494	73.6463	29.3274	3.72737	209.511	4.42369	67.748		9.46178			19.6609	2221.47	166.749		47.7185		124.601
1554.97	69.6731	49.5208	605.472	240.026	5.73441	20.2753		1020.15			62.2184	855.616	334.398		42.5985		75.7352
7.24994	240.723	276.645	517.981	409.314	57.6309	528.467		832.35			170.353	6.0621	324.732		17.5719		29.0817
1782.17	317.195	41.9841	18.7597	336.569	707.954	94.1673		605.595			225.362	5.48865	75.1618		1252.36		138.691
849.103	10.3629	159.949	98.4681	1446.3	104.694	2514.25		116.409			332.76	12.4109	86.7945		6.96322		23.8388
57.2622	15.442	795.24	36.6593	4.71041	3.68641	14.377		410.502			82.8213	17.449	292.742		314		70.5333
89.4569	14.9504	328.336	8.56066	4.05505	19.9476	1676.33		81.0191			61.604	293.848	102.482		5.85729		75.8581
3424.14	47.3089	550.545	20.7258	5.89826	455.722	6.96322		1909.31			60.1704	371.344	143.647		14.9504		113.009
339.354	169.288	36.5774	523.388	23.2244	18.7597	207.299		6.8813			226.55	127.017	225.281		20.1114		56.6069
559.146	389.858	1451.22	3.48161	61.1534	279.02	33.2596		4.21889			194.888	940.116	137.995		10.3219		171.377
130.745	480.134	4.62849	201.729	177.603	176.006	522.282		13.8445			452.732	750.266	156.795		170.394		32.7681
2440.61	184.361	5.07905	62.4642	2578.89	261.899	91.8326		917.097			228.353	64.4712	124.396		21.1764		9.37986
34.6522	68.3215	20.6849	12.37	135.947	408.086	12.8205		4.01409			551.2	248.382	213.443		38.2977		245.597
55.7057	236.586	267.101	10.8135	265.34	4.99713	139.551		16.8346			159.376	394.61	134.226		73.8101		250.102
133.325	383.591	143.483	18.0224	1392.48	362.251	295.077		591.914			21.7089	3516.79	28.2625		4.13697		45.5476
465.553	132.096	123.986	886.581	6.02114	344.393	30.761		2719.91			96.6249	4.25985	137.708		75.0799		523.88
894.937	165.888	921.029	2.66241	6.63554	321.987	1308.84		4.71041			125.788	4.42369	24.2893		61.3582		245.105
4.62849	96.6658	146.309	2.99009	23.8797	761.94	169.411		884.042			22.2413	5.89826	162.734		139.715		39.4036
4.17793	253.379	87.0402	277.628	35.3486	4.75137	9.83043		167.363			132.424	10.281	293.684		904.44		208.528
5.77537	92.6108	64.3483	2.82625	66.5192	87.286	51.7736		30.1876			81.3058	296.469	105.227		3.56353		80.118
27.9348	276.44	305.235	3.93217	1524.62	19.9476	14.377		223.11			80.3228	20.6439	231.261		3.39969		425.862
62.8738	167.363	113.378	126.894	14.0903	685.713	73.1138		291.472			117.023	63.0376	128.983		308.266		131.072
1149.3	153.355	433.481	318.014	46.1211	55.7877	322.848		154.542			52.9205	223.028	369.255		6.84034		55.0094
286.762	104.571	910.871	476.571	101.13	889.735	12.5748		126.894			25.3543	1357.54	602.073		398.624		14.2951
380.437	431.515	21.7908	204.801	773.736	166.052	31.7441		376.505			148.317	5.24289	324.732		47.5547		109.077
191.161	176.047	941.632	52.5518	1828.58	205.169	1841.69		1108.05			29.9418	4.99713	21.1764		146.391		220.079
129.557	111.33	240.108	16.6298	6.30786	288.113	10.8544		14.9504			26.3373	6.02114	125.788		98.3043		212.091
61.8498	1048.66	791.39	26.7469	822.97	96.461	169.288		643.811			178.996	1013.35	109.241		32.7271		194.274
168.346	737.61	4.54657	11.0183	8.35586	620.259	56.2382		1880.64			29.2865	6.0621	300.033		154.706		91.0543
171.254	212.173	347.342	918.858	5.03809	343	39.8542		292.414			16.3021	10.8544	119.276		27.4433		237.691
106.169	141.108	7.0861	210.658	12.7386	17.408	173.876		53.6577			63.4062	17.8996	164.578		24.8218		559.105
453.428	135.988	1397.48	114.074	28.5492	11.1411	1837.39		71.2296			67.9528	177.398	67.5432		17.5309		65.5362
79.5445	396.289	6.0621	55.5009	60.8667	1239.86	4.50561		1667.4			46.244	37.4785	39.7723		92.1602		58.4091
153.969	235.234	9.91235	424.797	192.226	57.8766	17.9405		3041.08			163.677	173.712	17.0804		81.7154		68.2395
138.445	342.549	14.377	3.23585	1798.8	5.20193	1282.75		12.1242			253.953	493.733	311.379		36.3726		5.98018
160.85	884.984	13.2301	4.58753	3.48161	6.92226	71.0658		1255.35			70.6971	181.945	91.9964		54.9685		43.3358
310.437	650.938	847.383	333.579	4.13697	53.6987	15.1143		411.854			242.566	88.7605	255.55		23.7569		101.212
167.404	567.256	4.01409	333.989	5.57057	132.957	430.286		200.868			72.7042	252.355	136.151		65.5771		40.6324
352.707	541.575	3.85025	234.947	16.8756	7.0861	175.637		472.762			53.5758	76.2268	95.5599		27.8529		55.5419
597.731	608.217	5.85729	112.313	305.562	10.5677	88.5148		242.934			44.9742	93.389	61.8907		38.4206		82.0021
787.868	672.032	386.622	30.9249	1281.4	1039.49	89.6207		471.082			162.407	170.066	313.304		34.2426		39.8951
289.629	280.536	5.40673	18.1044	10.1581	82.125	245.351		1478.41			97.0345	59.4331	221.512		122.061		22.8557
54.2721	385.598	9.62562	39.1579	13.2711	27.1565	176.989		4.34177			407.266	344.229	33.1367		33.3415		8.60162
63.652	18.0634	342.14	17.1213	85.9343	563.12	1897.11		4.21889			87.3679	164.086	78.6434		77.4965		105.882
126.321	15.9744	675.432	9.99427	197.673	802.695	467.191		197.96			94.8636	276.89	27.4433		63.7339		12.1242
77.046	44.8923	6.63554	13.2301	875.481	4.38273	409.56		1175.64			54.1083	92.6518	306.955		260.793		39.3627
203.981	87.4498	15.2781	425.166	5.93922	5.48865	337.266		3.11297			234.251	870.156	189.4		126.976		25.2724
966.372	83.4767	9.91235	2.99009	5.44769	393.463	56.3611		3.35873			62.5051	432.293	114.156		871.508		83.7634
171.5	375.276	545.998	4.99713	18.8416	73.2776	60.7848		4.21889			81.5516	1027.81	173.63		2078.97		38.9531
584.132	392.562	320.349	838.863	44.6875	491.644	27.1565		6.71746			242.607	123.372	144.876		3.52257		119.89
1479.56	246.826	57.9585	527.279	94.0444	8.39682	7.74146		518.924			35.8401	141.558	46.8174		232.285		423.937
3.03105	358.032	174.285	3.60449	2713.2	639.51	389.735		3.89121			56.7707	284.14	149.955		126.731		1305.93
2.82625	226.386	1021.42	308.716	4.17793	1172.52	102.564		4.25985			43.4177	457.074	301.262		72.4175		1123.33
4.21889	73.9739	39.4036	3.27681	3.72737	118.006	604.489		5.16097			102.155	482.674	317.891		13.7216		196.404
261.039	229.213	94.454	922.094	4.46465	4.42369	543.131		23.0196			47.5137	155.403	184.034		46.162		172.934
4.21889	77.4146	382.24	27.9348	5.81633	653.273	9.17506		186.205			152.208	111.166	122.061		24.4122		162.243
4.58753	134.923	68.7311	361.063	42.1889	12.37	57.9995		123.454			23.1425	239.494	221.348		11.1002		135.578
13.5168	152.454	245.638	3.64545	131.523	4.99713	159.048		3149.55			38.1339	95.1503	52.9614		110.51		112.722
1568.2	106.824	178.463	246.129	924.756	5.48865	23.1834		3.56353			29.2046	433.931	119.194		86.1391		52.9205
3.85025	50.299	385.107	407.143	93.8806	19.7428	727.124		3.72737			22.0775	483.493	327.517		11.305		11.1411
3.80929	53.0024	62.1365	2.53953	573.933	406.447	59.6379		7.00418			43.3768	437.495	468.215		48.4558		19.4151
562.587	51.6917	377.243	1.67936	114.77	101.13	52.1422		188.171			75.2437	8.35586	72.1307		60.621		182.969
4.75137	34.0788	174.121	374.58	289.137	326.206	56.9755		36.4955			300.77	16.8346	113.951		29.0817		141.067
195.585	119.767	100.516	2.70337	242.975	212.624	346.522		166.544			266.773	43.9912	262.022		162.857		122.88
5.24289	228.803	59.0235	3.35873	253.215	38.3796	166.339		131.113			79.8722	893.217	169.657		301.835		11.264
570.615	180.102	496.396	961.62	88.2281	282.256	74.1378		21.0535			61.3173	117.023	284.058		935.037		46.8993
4.30081	135.127	1029.12	2.62145	95.9695	203.695	32.6862		65.4542			101.171	4.30081	71.4754		332.924		127.755
4.58753	99.0825	79.9541	175.473	178.176	518.924	628.164		230.687			53.6168	5.24289	377.12		7.74146		175.883
158.761	317.85	718.072	75.6533	95.6418	22.7738	1475.42		94.413			185.304	13.394	71.9669		94.9865		49.8894
403.334	206.398	8.43778	240.559	114.77	91.7916	103.097		171.991			72.6632	16.9984	258.09		60.0475		93.6758
4.91521	102.482	13.394	3.48161	229.663	839.15	9.78947		230.769			309.126	119.972	254.936		54.8865		236.79
4.75137	180.102	673.794	4.25985	463.586	4.34177	110.428		318.465			10.9363	190.096	198.329		26.4602		381.502
327.271	59.597	28.3034	1127.92	1178.5	5.40673	264.07		154.338			116.368	348.448	282.297		78.1519		891.456
4.87425	97.8127	382.731	138.773	450.356	306.464	2411.61		45.0152			66.3963	177.562	77.7832		163.021		99.4921
38.0929	105.964	1047.19	334.685	1880.93	16.384	70.9019		120.136			239.33	175.391	93.5529		95.519		950.725
509.953	60.9896	113.173	395.757	19.6609	221.43	253.338		115.712			233.227	455.64	32.4814		310.232		4.13697
320.759	227.451	1388.59	78.029	52.4699	5.20193	6.51266		137.012			94.8226	223.274	85.238		773.695		526.87
1574.67	260.629	871.303	245.597	92.8156	541.82	2070.37		63.4472			30.5153	352.871	42.9671		3.48161		890.637
24.0026	168.346	4.83329	13.5168	2003.56	87.9004	147.784		243.385			174.449	235.316	159.703		286.639		44.0731
155.239	225.649	6.0621	972.065	182.559	5.52961	31.4574		204.268			72.0898	209.511	314.533		77.7423		13.2711
1300.52	134.062	706.48	2.74433	225.403	7.86434	313.877		813.14			37.2737	372.368	81.7973		10.24		18.2682
3.76833	356.312	500.983	3.27681	560.662	131.81	90.8905		339.477			31.3345	1727.7	400.795		96.9116		22.3233
3.56353	136.233	183.501	4.50561	171.418	650.651	1999.63		188.621			110.183	4.17793	148.153		418.94		79.7493
4.62849	1895.43	860.326	378.226	384.738	4.62849	36.1268		58.5729			87.3269	5.40673	106.046		1627.34		41.2878
7.94626	95.437	76.7592	461.907	463.832	481.527	11.305		883.059			196.649	55.6648	116.245		54.7227		81.3058
199.721	219.71	1126.69	287.253	1053.99	325.469	510.486		143.483			113.296	132.834	274.269		3.56353		85.4837
193.864	107.438	4.42369	251.7	40.4276	9.70754	89.3749		410.134			58.5729	933.686	185.304		235.725		40.6324
650.078	71.1067	4.66945	3.44065	124.519	456.705	895.347		79.7493			57.8357	4.01409	846.891		90.7266		17.7357
7.33186	140.821	8.97026	877.12	1695.22	187.024	61.8498		65.5771			47.0222	3.76833	205.374		92.8156		64.9627
1092.57	65.2904	896.371	151.511	7.61858	927.91	766.65		39.9771			15.1143	15.0733	175.104		29.6551		7.9053
27.2794	63.693	4.99713	354.018	4.38273	748.751	6.59458		521.668			6.75842	16.425	256.246		62.587		127.55
67.5432	79.9951	5.73441	3.64545	7.0861	26.5012	698.493		91.9554			263.578	218.358	131.851		90.1532		115.016
1115.75	149.463	11.305	1021.01	21.0125	300.033	55.2961		985.213			41.083	15.1552	164.414		50.34		94.1263
120.955	72.2127	12.9024	2.49857	219.874	489.35	190.26		206.808			48.5377	636.192	165.233		94.9046		95.6009
410.134	352.134	858.073	664.742	349.349	638.732	15.5239		370.32			96.2153	331.818	267.797		80.1999		770.828
908.372	369.993	235.93	80.2408	1870.65	185.467	1312.77		147.743			23.2244	223.642	191.652		26.7879		318.629
25.2314	137.053	95.6418	241.542	9.50274	180.47	489.924		267.715			14.7866	95.519	170.722		24.0436		1022.98
27.0337	124.15	312.28	4.58753	7.9053	761.366	675.268		225.117			13.5988	327.763	24.0436		218.358		473.622
620.709	176.251	179.037	16.384	19.0055	3.72737	33.5873		338.29			32.6862	71.9669	202.834		2373.47		5.89826
1414.64	303.637	3082.74	347.342	38.7483	78.07	59.8427		2904.48			32.2356	217.867	130.908		3.19489		10.281
10.6087	157.983	18.2682	4.01409	93.7577	117.924	1278.41		2.90817			8.35586	147.293	222.7		6.92226		399.156
875.522	157.328	55.0504	265.258	709.798	589.498	1154.01		2.99009			16.0154	142.009	24.3303		142.951		373.269
6.59458	239.125	757.762	74.3016	355.165	16.5479	11.4279		4.01409			19.8247	210.412	490.415		158.72		102.073
1020.03	963.3	4.99713	82.2479	13.1072	330.097	401.614		5.85729			171.664	92.7337	54.1493		33.2596		29.2455
3.89121	747.932	5.40673	79.012	53.1662	239.944	526.378		758.704			132.055	605.349	274.31		132.793		31.0068
965.143	4.05505	352.134	17.5309	53.5349	5.32481	53.371		1285.98			35.922	135.988	19.2512		53.0433		141.722
3.31777	3.80929	5.93922	8.23298	115.262	6.0621	12.288		6.38978			37.5604	557.672	175.924		186.86		56.5249
3.15393	64.9218	898.665	25.8458	1470.63	611.043	16.6298		219.096			114.975	53.7397	230.319		4.38273		36.0449
27.4433	29.4094	3.31777	374.089	5.57057	422.258	34.6932		161.588			121.57	68.8539	131.195		378.799		218.809
253.543	1498.53	3.23585	2.74433	68.6491	521.176	88.5967		1181.04			84.6236	428.525	144.384		1045.3		160.072
301.507	4.01409	4.05505	3.23585	1627.47	4.83329	38.1748		223.56			85.4428	631.4	41.2878		186.368		68.9359
1811.5	3.80929	86.7125	407.43	6.22594	403.621	419.431		308.88			162.325	188.212	373.597		75.2028		33.7102
3.56353	50.0123	306.341	125.051	7.65954	27.6481	19.7018		397.968			47.6776	9.46178	142.664		110.183		108.421
3.64545	54.3131	2264.56	870.689	26.9927	921.193	46.7764		37.2737			56.6888	13.5168	185.918		145.081		18.8007
44.196	84.6645	4.75137	101.171	60.7438	238.06	648.521		471.819			29.778	16.5479	121.897		1360.41		16.3021
2528.59	96.1743	4.66945	128.942	104.243	532.563	48.7016		919.104			16.5069	24.617	414.23		6.63554		78.8072
425.002	178.914	9.01122	24.1255	260.711	6.71746	2.82625		810.355			31.5802	724.298	63.611		54.7637		20.6849
440.649	148.398	16.2202	28.4263	37.7652	140.37	55.5829		865.282			22.6509	5.20193	149.095		6.51266		25.9687
107.807	1655.89	541.738	41.9431	824.814	1103.51	450.356		7.86434			62.7918	7.37282	109.691		247.194		69.4683
1340.79	341.648	137.872	1053.13	6.59458	5.98018	748.054		7.16802			80.5685	27.8938	121.692		10.24		34.857
437.904	235.971	40.1409	4.66945	32.891	561.645	322.356		598.018			115.262	38.9531	91.9964		326.493		123.618
690.751	149.136	266.568	889.653	151.348	739.453	319.243		295.159			58.6958	136.766	115.344		635.906		30.8839
132.096	104.162	218.072	2.94913	1532.32	480.872	162.571		26.5421			43.2948	207.094	37.6833		1102.61		39.7313
1652.74	205.62	1221.88	3.52257	320.062	4.05505	290.735		113.705			19.7018	217.048	26.4602		3.52257		26.6241
510.895	55.1733	94.495	272.999	1990.78	276.808	482.92		223.724			179.078	129.188	21.6679		213.648		5.81633
158.352	181.986	602.769	99.4511	47.4728	542.025	1250.63		231.302			27.8119	148.972	123.659		4.91521		36.7412
1436.63	76.4725	7.24994	599.984	1468.91	190.792	783.854		33.4234			69.2226	492.095	48.1281		673.958		338.986
994.757	106.783	367.371	87.6137	232.162	353.895	82.166		52.7157			14.4589	130.007	196.649		3.89121		67.2975
640.903	157.164	337.184	250.102	467.191	3.97313	22.0775		224.011			21.2173	89.4569	135.947		922.135		451.462
2267.31	128.738	281.928	348.611	675.637	4.75137	728.107		648.931			20.6849	124.314	175.268		3.64545		68.7311
294.257	142.992	470.55	38.4206	1271.36	101.008	1314.82		121.365			14.4999	82.6985	425.903		3.85025		163.39
163.226	67.9119	131.236	33.4234	1499.47	229.459	140.616		553.576			19.2103	511.428	84.8284		169.288		43.0491
509.994	576.513	868.027	255.1	40.6324	436.348	129.884		123.085			266.2	94.8636	47.3499		24.4122		71.0658
5.07905	59.8018	382.281	46.162	73.7691	166.339	14.2541		337.675			348.611	93.9215	21.2993		219.669		58.6549
5.07905	79.1349	92.2012	500.287	164.783	40.1819	1428.12		1399.03			23.7159	157.533	106.251		13.6397		19.5789
16.8756	237.651	89.1292	385.926	943.885	405.874	864.627		3309.9			42.4756	149.873	165.807		82.5346		43.131
24.0436	184.607	969.894	41.042	40.018	950.356	99.6969		6.43074			71.4754	144.057	85.7295		100.393		239.617
120.505	83.2719	6.0621	29.6961	73.1957	4.99713	679.61		39.4446			62.7918	386.909	320.595		37.7652		71.2706
1102.44	757.967	46.2849	24.6989	1609.04	15.5648	42.3937		641.886			7.4957	128.738	117.76		79.2168		203.613
1339.97	89.7436	900.057	26.706	1945.03	578.971	1920.62		210.453			180.716	53.6577	131.605		94.454		74.0559
232.735	661.997	5.52961	21.5041	265.135	644.302	92.8975		2422.05			102.646	293.479	169.493		30.1876		183.256
3945.65	70.9429	11.1411	31.2116	294.872	34.2017	1167.4		3.97313			46.0801	58.9416	24.2074		15.8925		49.0292
3.52257	59.1054	288.482	31.0887	1341.61	49.234	270.623		4.38273			109.527	107.07	56.7297		37.6833		60.4162
3.39969	171.172	4.34177	202.957	1096.62	136.397	110.838		5.61153			53.5349	21.3402	192.144		49.9304		20.3162
4.42369	1168.02	4.38273	14.7866	1363.77	7.0861	33.6282		37.0689			10.1581	71.2706	276.481		54.6817		7.7005
6.59458	4.34177	8.43778	13.1482	124.232	797.37	20.1524		320.103			151.798	123.74	187.597		59.9656		55.0094
662.53	3.64545	421.479	43.172	134.226	232.08	32.6862		69.9599			47.5547	31.9079	205.702		99.5331		31.2526
5.07905	4.79233	4.50561	159.417	56.6478	12.1652	963.3		52.5928			15.1552	227.656	354.387		1587.53		67.8709
24.9447	19.0464	585.729	14.1312	334.071	259.974	899.812		315.884			6.84034	327.517	143.852		3.56353		631.81
57.7537	23.0196	5.93922	51.6097	476.694	349.021	80.8552		1303.51			24.5761	29.4503	80.118		317.318		320.881
709.265	76.2677	41.2878	257.844	2072.5	25.0676	9.29794		632.834			39.2807	386.663	128.369		3.93217		1049.15
1142.34	30.6382	857.541	509.871	438.396	712.911	294.995		124.232			44.3598	182.15	138.937		4.17793		849.84
3.35873	16.7117	5.16097	2.58049	294.135	139.06	1660.56		1696.65			77.8242	77.7013	255.96		313.918		776.235
3.19489	27.4433	18.5549	5.07905	886.131	215.778	112.599		4.21889			11.9194	184.28	346.113		4.71041		1468.95
4.01409	83.2309	36.946	404.522	388.793	299.295	70.6562		4.01409			7.0861	258.581	22.61		7.12706		148.194
500.614	159.048	456.91	50.4219	356.803	109.363	30.1057		4.87425			100.229	32.6452	60.1294		62.5051		46.4897
3.68641	97.3622	25.8868	750.512	504.588	478.783	1246.29		20.3162			9.62562	118.498	392.398		9.37986		19.6609
5.77537	80.4456	1239.86	2.78529	5.16097	413.533	13.0253		18.8007			22.6509	243.426	110.592		1301.26		8.43778
655.321	113.009	209.183	3.64545	9.58466	28.4673	776.808		212.542			37.1918	30.1466	28.754		3.68641		108.544
5.16097	50.5857	603.424	510.732	785.123	215.204	9.1341		85.6885			24.8628	58.491	38.8711		3.60449		45.4657
4.71041	212.788	117.678	444.417	19.7018	508.561	365.774		40.7143			95.8466	38.8711	89.0063		192.267		146.555
9.50274	123.29	10.0762	3.11297	56.1973	402.146	35.1028		19.2512			16.7936	168.674	22.61		100.066		691.529
29.4913	151.143	845.212	217.252	104.407	77.005	183.624		9.37986			52.388	85.5657	31.6622		401.655		78.2338
409.601	99.2873	210.576	28.4263	995.085	355.452	62.4232		674.08			268.33	345.58	47.5137		358.892		100.352
5.07905	184.034	567.134	43.09	193.455	180.102	1097.81		164.332			44.7694	251.864	231.752		1012.08		17.408
30.802	136.561	219.505	313.386	1381.26	253.215	267.265		600.721			10.3219	498.403	194.274		3.35873		26.9517
1422.05	175.227	1036	869.788	268.657	366.962	550.299		45.0152			7.41378	308.552	344.802		252.109		102.769
4.58753	232.694	591.013	2.62145	299.132	553.699	2398.38		1361.47			82.7394	179.979	164.66		106.619		219.259
4.21889	345.539	102.564	3.23585	765.258	102.851	355.247		489.842			174.162	246.539	78.9301		22.6509		154.092
168.018	163.39	1076.76	381.093	410.174	442.492	2268.49		1041.94			55.419	269.804	238.756		229.622		694.97
1001.23	134.636	98.591	606.619	215.163	533.833	5.73441		144.221			377.079	282.379	243.426		86.7945		144.098
5.07905	62.9966	362.825	399.238	142.91	155.607	136.684		201.729			178.873	528.672	535.471		50.0942		169.042
22.1594	120.628	623.904	2.78529	555.214	4.87425	701.319		879.168			144.876	334.685	125.297		4.91521		97.1574
416.482	84.3778	3.89121	3.56353	637.298	238.797	300.197		319.735			38.2567	253.215	58.6549		90.5218		124.683
5.77537	288.933	3.44065	1753.58	327.476	725.362	6.10306		50.4219			197.714	222.864	245.884		41.7383		1346.4
45.5476	143.975	5.20193	3.23585	562.669	170.886	100.967		114.688			111.78	224.83	259.892		5.57057		650.406
17.5719	393.094	6.18498	704.432	38.5435	484.763	1364.18		443.024			96.6249	135.005	25.0266		81.3058		626.567
177.48	312.239	1002.25	130.908	993.283	872.901	602.482		261.94			47.9643	262.8	28.1396		95.6418		113.05
659.212	68.0347	5.03809	622.88	529.286	80.077	92.9385		2067.63			72.0898	521.627	126.812		26.4193		108.995
611.821	111.371	4.91521	49.8075	891.906	4.79233	429.262		4.25985			124.56	47.0632	100.598		8.5197		273.614
183.993	122.594	10.4039	220.12	849.881	4.75137	144.507		4.91521			21.8727	156.14	440.608		275.293		109.323
592.406	85.6885	16.8346	105.104	160.236	491.89	541.452		5.65249			55.9925	248.587	66.3963		57.8357		240.477
291.595	217.211	82.125	13.2301	226.1	123.577	39.4036		189.277			75.981	85.4837	23.2244		67.2155		156.427
407.512	110.592	1186.61	309.781	327.23	695.257	10.9773		263.906			10.1171	224.666	19.5789		246.375		69.7551
171.5	301.139	3.35873	705.005	469.075	5.69345	20.6439		182.764			645.408	114.975	265.913		759.892		222.29
166.134	464.979	3.23585	2.99009	468.747	376.997	30.5153		115.426			99.7379	262.923	428.525		1.96609		350.987
170.066	145.982	5.28385	3.89121	246.908	6.75842	1034.32		311.256			36.1268	60.9896	61.7678		10.1171		155.526
301.507	284.304	1166.5	142.5	1150.41	31.7441	875.113		1519.29			147.006	35.2667	81.5106		9.99427		98.3862
1293.07	189.932	3.60449	614.197	5.48865	795.773	707.913		240.6			220.898	125.87	378.635		25.641		30.3924
165.028	101.663	3.31777	512.124	5.44769	3.97313	673.384		340.092			37.7243	619.194	123.29		167.117		42.5985
885.394	53.9445	4.87425	3.56353	16.0154	5.12001	356.599		944.458			267.306	59.8837	62.9966		1471.94		113.91
1506.47	96.4201	7.41378	699.189	61.645	13.1892	76.7592		66.1915			82.3298	240.6	53.1253		3.68641		54.1083
36.987	93.389	215.163	34.4065	99.9427	294.831	1581.72		231.343			58.5729	1133.98	16.7527		3.48161		101.95
702.548	114.197	71.8031	81.9612	186.778	128.123	1689.73		1297.17			31.0068	7.4957	13.8036		286.27		63.3653
806.464	353.158	336.119	15.8925	312.608	3.85025	5.36577		3.80929			113.337	7.74146	96.6658		590.276		26.5421
80.5685	88.5967	7.61858	7.45474	307.692	5.24289	102.155		3.97313			49.1931	8.3149	157.819		44.4827		25.3133
706.93	57.1393	7.78242	53.3301	344.597	53.4939	296.838		12.6157			92.6927	9.58466	56.5249		1215.49		52.9614
3599.82	111.33	564.062	642.787	672.278	54.7637	25.3543		12.37			263.701	20.7258	381.093		3.56353		56.1563
535.635	130.294	5.07905	2.49857	106.005	703.367	1754.61		12.4928			80.118	26.8289	362.128		3.39969		191.488
9.99427	110.551	5.65249	2.99009	263.906	3.80929	17.8996		149.832			171.09	13.8855	500.573		173.548		23.9617
28.1806	241.255	6.75842	4.21889	123.618	1053.62	218.481		551.446			75.7352	51.8555	58.9416		6.10306		16.9165
1264.15	94.7817	8.47874	369.583	234.415	352.953	442.902		528.14			66.6421	786.966	204.678		30.761		43.7044
572.786	219.587	741.951	3.52257	562.587	1109.73	442.492		2551.49			67.9528	361.186	28.3034		341.239		36.4545
354.182	165.438	7.94626	150.815	1588.31	435.242	139.797		4.05505			200.295	681.576	40.7963		408.045		88.4738
1429.67	222.536	719.669	199.025	543.5	9.29794	47.5547		4.50561			185.672	83.0261	16.3431		229.418		78.07
70.6971	221.266	4.34177	62.9966	111.862	247.809	6.30786		295.077			81.7973	61.3582	42.0251		234.497		16.6298
185.222	106.701	462.726	68.3624	194.192	619.767	32.6042		137.339			24.6989	50.5038	269.108		831.859		96.2153
100.803	97.1164	4.34177	520.316	81.2648	5.40673	2563.04		371.59			187.311	374.334	236.708		1168.39		102.073
88.4329	104.203	4.62849	2.49857	20.7258	699.435	129.884		1801.84			65.4133	624.027	111.698		3.23585		608.462
157.533	110.51	5.07905	3.03105	62.2184	6.10306	6.55362		3.68641			46.9812	24.9857	133.325		429.753		1035.92
134.226	87.8594	34.3246	248.218	32.5223	71.6392	718.727		3.56353			42.1479	712.296	103.629		7.12706		991.603
1193.66	454.248	777.423	527.812	19.5789	8.80642	440.731		5.20193			27.73	190.587	148.767		81.5925		34.9799
289.055	611.289	3.68641	2.58049	22.5281	576.391	1138.49		38.4206			24.7399	2282.91	285.779		4.71041		38.5025
178.135	738.715	3.56353	3.11297	15.0733	36.946	191.12		436.225			66.5192	19.9885	34.2426		91.5049		36.0039
221.635	40.4276	4.38273	289.178	44.4008	145.367	9.46178		4.87425			228.353	14.7456	55.46		582.535		15.7696
595.109	58.3681	16.0564	785.779	124.15	5.03809	1560.54		5.28385			41.3697	18.6368	48.1691		4.54657		77.4965
427.132	448.063	107.93	2.58049	178.504	320.308	1936.76		14.6637			22.7738	365.528	240.927		4.83329		53.6577
1863.89	106.537	424.879	3.07201	63.0376	133.448	1489.23		13.353			33.2596	114.197	273.245		680.388		55.1323
566.232	146.187	4.99713	323.339	117.842	276.317	1124.85		441.796			21.7498	288.974	127.959		6.51266		14.9095
174.367	205.743	5.98018	83.3948	118.047	4.25985	38.7892		840.911			97.2393	46.4078	60.8258		32.85		108.995
162.038	281.887	325.92	280.044	132.588	452.159	206.685		522.446			43.6225	228.639	207.463		4.95617		112.886
53.2891	133.366	1005.73	2.99009	99.7788	614.565	18.8826		122.225			253.789	740.272	30.0647		163.021		17.3671
216.802	950.52	6.79938	3.80929	63.8568	5.48865	997.665		1655.77			119.726	140.247	62.8328		115.016		37.3147
149.914	194.274	25.5591	341.443	79.9132	834.726	320.103		4.95617			219.218	6.43074	81.5925		1536.33		37.4375
105.186	184.28	1616.9	812.444	78.1928	570.656	6.2669		628.492			68.9359	16.3021	324.486		3.31777		125.174
78.6844	317.031	4.05505	4.79233	96.8706	237.896	14.2132		877.365			30.9249	49.3979	52.5109		3.31777		200.213
126.239	33.0958	679.282	304.211	103.752	309.904	5852.83		465.553			26.9108	26.7469	70.9839		383.878		64.8808
593.717	105.145	3.89121	347.956	22.9786	74.6703	1890.47		495.74			42.3118	521.791	349.185		5.85729		124.109
949.537	879.905	3.76833	1289.1	22.2823	4.79233	1758.38		1739.86			40.4686	41.3697	20.6439		360.613		760.506
1758.79	3.39969	9.42082	3.15393	36.0449	355.452	6.92226		3.52257			44.6465	28.6721	129.229		1433.36		746.129
1007.95	3.27681	971.451	149.996	37.6014	256.615	10.7315		3.31777			62.4642	179.733	179.897		3.39969		93.389
25.682	4.01409	5.40673	36.946	46.5716	493.487	1288.52		1224.87			92.7337	170.025	434.955		560.662		1019.66
1013.84	6.30786	7.86434	158.27	340.706	488.285	10.0352		3.52257			48.5787	340.747	125.952		23.2653		3.64545
4.71041	8.27394	12.8205	1196.53	242.484	291.882	12.329		3.76833			204.596	78.2748	64.676		903.129		4.50561
331.49	1061.44	736.913	551.61	424.715	246.989	1751.25		5.28385			48.292	372.082	106.455		3.48161		16.466
544.237	3.72737	4.79233	53.5349	195.011	84.6236	22.8148		1029.98			115.958	118.293	45.7115		525.887		259.646
169.739	3.44065	11.5507	23.2244	1031.62	4.50561	631.892		414.967			77.6604	479.479	251.946		5.03809		550.463
239.289	4.62849	909.724	511.182	152.617	6.79938	6.10306		1608.13			35.1028	73.7282	48.1281		1172.16		484.107
2001.02	17.7767	554.764	3.07201	251.7	644.671	836.979		73.9739			69.5912	103.67	48.4558		6.96322		3.39969
145.408	76.2677	525.928	256.001	263.414	539.895	54.8865		213.115			384.861	71.7621	180.962		187.925		1403.33
200.664	123.331	539.854	67.7071	257.229	497.338	421.643		230.605			176.21	278.774	63.5291		370.197		4.30081
436.88	105.063	10.9363	33.5463	898.009	13.5988	361.883		235.029			87.6137	79.6674	56.7707		243.057		204.719
834.316	128.82	15.6877	47.6776	441.796	27.4842	100.967		524.904			100.311	88.4329	360.08		1315.15		233.8
193.741	139.838	17.7767	338.085	185.099	4.30081	8.56066		214.18			77.3327	186.86	60.621		3.76833		65.2904
140.411	25.1905	960.228	2.86721	268.084	420.537	278.611		2970.84			52.2651	67.2975	52.7976		361.391		146.269
594.823	516.671	37.4785	3.60449	475.301	5.65249	111.78		6.10306			38.6254	44.7284	75.3666		49.6846		38.6254
224.707	241.747	486.647	4.42369	82.2069	594.536	238.019		6.8813			168.879	263.906	205.046		375.481		75.6533
119.685	423.241	552.47	393.504	54.3541	430.736	616.081		9.7485			85.197	113.091	71.5573		5.32481		58.0814
116.286	69.5912	5.61153	4.34177	50.7496	7.04514	391.128		8.7245			21.5041	604.694	107.725		500.573		277.136
108.38	211.559	6.18498	86.9173	110.674	10.0352	9.58466		5.57057			32.6452	103.097	373.433		1389.98		9.17506
71.0248	98.3862	35.6353	1148.81	144.261	140.165	16.9165		5.57057			21.1354	150.201	330.589		3.80929		57.6309
164.209	116.982	281.642	131.81	117.76	70.4104	40.3457		140.493			45.7524	142.664	28.0577		329.893		1015.11
1575.53	106.865	381.584	27.689	90.317	48.7835	734.251		151.307			35.0618	270.05	264.357		5.07905		7.98722
279.43	41.9431	32.7681	61.0715	87.5727	622.143	213.034		204.841			88.1461	263.169	160.154		12.0423		477.144
177.931	368.149	614.524	13.9264	165.766	98.7139	1045.75		269.64			73.6872	213.115	51.8965		30.5972		4.17793
285	247.153	634.677	29.6551	127.632	364.75	1391.54		539.69			14.1312	803.76	368.559		5.48865		9.66658
329.319	235.93	67.748	12.8615	152.904	21.4631	1336.69		2233.35			21.4631	162.898	192.226		71.1477		1057.02
95.7238	151.634	1053.29	13.7216	1660.44	143.688	4990.95		4.21889			11.3459	90.8905	631.236		405.095		177.316
161.383	177.685	383.837	303.473	514.705	4.66945	1338.86		4.34177			24.0436	339.928	127.017		250.143		75.6124
132.957	178.217	122.225	4.17793	1809.33	104.407	5.61153		3195.58			29.9418	111.821	125.952		295.568		94.1673
114.688	85.0332	328.828	305.194	561.153	7.16802	9.50274		8.47874			11.7146	340.01	388.752		1022.16		72.2536
588.351	242.197	335.095	3.31777	348.243	23.8388	3706.64		33.1777			9.7485	255.632	80.8962		4.09601		147.374
402.679	46.3668	570.41	212.296	268.698	323.339	19.7837		969.608			122.143	61.6859	94.1263		211.6		36.5364
1133.57	103.138	6.59458	3.48161	293.233	331.9	2425.86		1638.53			30.3105	123.249	55.3781		4.54657		88.8425
114.688	193.577	352.093	220.283	376.423	316.171	5.07905		6.22594			7.04514	399.115	44.7694		113.091		14.2541
195.052	147.825	54.395	66.9698	551.528	483.944	561.399		4.13697			8.64258	42.5575	312.648		35.3486		30.1876
74.0559	76.4316	54.6408	32.85	325.674	702.138	153.518		1225.28			23.8797	283.444	223.888		1622.18		15.8925
294.585	123.003	92.2422	591.423	286.598	538.462	8.76546		3.23585			17.1623	65.9867	40.9601		3.19489		27.0337
89.2521	255.14	379.413	111.411	373.392	72.2127	901.819		3.19489			187.966	82.2069	109.159		123.822		95.2732
172.401	224.748	297.288	380.356	477.39	5.44769	994.266		4.13697			328.131	291.882	194.151		488.654		27.6481
170.517	426.108	48.3739	68.8539	91.9554	1036.95	451.421		4.71041			15.3191	77.046	83.8863		3.60449		21.2173
208.241	60.58	102.236	230.032	42.8852	246.498	1922.83		473.13			14.377	126.362	28.5492		58.0405		60.0066
70.1647	411.567	69.9599	31.9489	64.4712	1136.68	4.79233		4.71041			37.4785	49.6027	177.111		6.63554		50.7086
95.3551	87.6137	92.0783	12.8615	71.5573	617.924	7.04514		5.77537			28.6721	222.331	89.7845		41.1239		127.304
110.592	131.973	80.7324	429.057	33.874	736.79	76.0629		1400.43			106.988	664.25	287.171		242.484		18.1453
36.3726	379.536	474.031	3.31777	40.4686	1079.26	249.857		75.94			58.6958	31.2116	41.4107		5.85729		42.4756
410.461	159.744	417.629	4.34177	89.0063	4.13697	1278.86		1069.47			70.4514	57.6718	163.595		837.347		20.0705
260.301	907.266	14.5408	148.153	27.4842	728.639	90.4809		2275.95			72.909	52.6747	332.842		12.329		14.2541
305.767	221.553	16.7117	583.886	72.3765	3.85025	1518.06		502.785			39.8542	476.53	32.2766		7.78242		44.0321
181.863	95.1913	69.7141	654.624	36.9051	4.95617	9.87139		768.862			26.8289	310.846	134.349		225.322		30.761
249.078	157.287	419.554	122.921	40.6324	10.24	126.28		1833.82			21.7089	224.093	129.68		1702.59		1222.29
189.359	274.351	6.18498	63.9797	48.6196	180.184	245.802		3.60449			22.5281	389.408	129.311		3.52257		216.884
433.808	191.775	20.4391	18.2682	31.9079	167.936	159.622		3.60449			22.1594	201.319	323.708		1526.67		747.645
742.238	170.476	448.472	20.9716	13.1072	345.744	5.77537		1525.4			30.3105	215.819	33.3825		3.19489		2522.9
602.769	203.49	1217.62	319.53	19.2103	429.549	189.072		2.99009			70.6152	179.323	316.212		2.99009		2.82625
197.264	393.094	6.6765	2.74433	7.78242	682.109	143.197		3.19489			73.6463	442.738	336.16		259.81		673.466
615.712	111.575	14.2951	3.64545	9.87139	457.729	32.7681		3.72737			12.0423	89.9484	51.7736		4.95617		3.03105
243.139	289.014	14.377	191.529	5.69345	407.43	1692.59		4.58753			31.2116	53.9854	40.9601		103.26		370.484
176.866	573.482	919.145	35.3076	40.5915	405.628	118.088		10.8544			22.6919	1604.9	19.9885		19.6199		1803.8
38.011	56.3611	97.7718	16.1383	19.2512	7.4957	1310.11		600.229			126.362	12.8205	91.5049		123.208		68.7311
306.586	257.27	37.8471	445.195	70.5333	131.932	17.7357		3.56353			27.0746	25.1495	213.197		1481.36		70.9019
210.453	500.696	857.623	388.67	41.9841	683.706	1449.7		4.30081			16.6708	273.654	16.7527		3.72737		137.913
80.3228	6.02114	314.737	51.6507	22.569	3.68641	926.19		578.684			55.0913	279.635	96.0924		184.771		230.483
106.332	11.2231	165.725	740.968	55.6648	10.1991	1094.58		603.26			176.989	149.054	108.913		484.148		389.817
98.4681	10.3629	598.386	5.28385	115.753	168.387			766.405			91.7097	211.19	39.5675		64.5122		110.347
76.6364	54.2312	69.0587	602.4	35.5943	245.884			868.641			262.513	171.09	124.601		5.85729		922.585
77.4556	622.716	840.624	3.07201	22.6509	358.933			670.23			71.1067	200.868	758.622		1002.01		114.852
328.828	3.68641	43.6225	3.97313	24.3303	389.408			2424.31			135.209	607.643	38.8711		4.83329		115.63
119.808	3.64545	34.0378	120.505	26.3783	9.25698			38.6663			134.308	94.3311	952.077		5.24289		25.2314
114.483	4.95617	567.789	85.1151	8.7245	665.028			61.1944			71.885	240.763	150.201		92.2422		24.2074
343.86	83.8044	23.634	178.299	8.3149	405.3			28.5902			100.066	730.36	115.589		6.10306		109.404
114.811	201.073	42.9262	628.082	89.7026	8.5197			164.25			41.5745	1085.48	1339.44		21.1764		14.2541
62.4642	702.712	53.5349	246.867	54.3131	651.839			2788.36			214.344	317.768	38.3387		397.067		127.427
356.763	3.93217	548.374	96.7887	34.4474	483.862			8.56066			48.6196	937.126	27.2385		3.76833		110.469
201.196	3.68641	635.496	386.95	12.7386	533.26			438.232			27.771	37.8471	34.6113		3.60449		73.7691
175.514	4.79233	149.791	188.376	8.68354	12.6157			2377.57			266.732	160.072	242.689		624.478		292.332
82.0841	9.25698	177.644	46.0392	13.1072	845.376			4.25985			101.335	319.816	61.7269		3.31777		1344.8
186.737	14.8276	48.7835	17.7357	4.21889	751.864			4.25985			202.425	70.861	61.2354		8.64258		3.85025
104.489	23.7159	251.331	17.3261	6.34882	30.802			6.79938			74.7112	1197.1	177.357		384.411		5.32481
113.419	91.7097	261.612	283.526	42.5575	176.497			1925.12			52.9614	3644.34	245.638		3.35873		464.078
66.8059	571.762	310.273	3.72737	8.97026	7.4957			3.64545			31.1706	8.19202	78.1519		956.091		4.79233
68.1576	14.7866	481.158	64.5941	12.7386	216.638			3.64545			18.0634	29.1226	140.452		7.24994		797.903
127.836	89.7845	84.4188	46.4078	42.8852	5.12001			5.61153			48.4148	90.9314	182.354		1023.92		2.86721
60.2933	254.608	74.998	30.2286	47.5956	21.2993			28.2625			142.091	194.151	421.725		3.89121		2762.02
414.352	246.703	811.788	104.121	34.7751	700.705			881.994			64.635	10142.6	58.1633		3.85025		352.462
332.023	148.931	1013.76	607.52	65.2494	4.30081			3.27681			92.0783	5.07905	111.452		447.571		170.64
294.38	155.075	259.196	3.11297	42.9671	241.787			3.27681			287.417	9.09314	766.036		156.836		4.58753
174.367	74.998	61.2763	4.50561	19.1693	5.32481			4.54657			58.8187	9264.27	903.785		1451.71		398.173
91.4639	104.899	80.3637	198.984	32.7681	838.003			5.98018			59.8018	6.10306	237.036		3.44065		1185.84
146.269	916.769	611.411	378.43	8.68354	6.14402			1876.91			47.0632	9.66658	92.0374		1433.24		180.839
120.341	15.401	89.6617	9.09314	89.0063	40.6734			3.31777			70.5743	12.7386	766.282		79.7903		788.441
104.08	27.1156	36.4545	286.721	13.8445	561.727			3.11297			22.61	5966.09	243.426		4.34177		58.0814
25.0676	50.34	77.1279	4.87425	9.87139	35.5943			3.85025			66.5192	1361.1	156.304		5.16097		26.2964
291.759	114.32	95.1094	106.291	24.1665	556.73			4.66945			71.4344	4.87425	250.963		2149.79		34.5703
112.927	307.406	133.202	18.5549	80.7733	7.20898			1127.43			29.4503	9.3389	47.8004		3.23585		177.644
117.842	822.11	426.886	49.4388	20.6439	149.996			1256.12			98.6319	24.9447	39.7313		3.27681		128.287
69.3045	3.64545	459.163	48.1281	38.3796	154.624			3.03105			302.695	7057.18	13.2301		675.104		1265.59
154.42	3.23585	129.475	50.2171	22.4871	313.55			3.19489			182.887	5.12001	66.6011		279.102		224.748
208.077	4.05505	871.18	14.7047	11.264	768.985			3.60449			111.411	621.447	27.9348		45.8344		39.8132
300.279	5.24289	16.8756	129.762	5.81633	6.79938			5.81633			137.093	57.8766	285.082		28.1396		745.187
690.833	61.563	70.82	14.7047	18.1863	8.27394			569.919			97.1983	3044.24	49.6846		12.8615		8.35586
192.021	493.446	51.364	22.8148	78.8482	525.559			5.73441			68.1576	3021.63	33.874		380.806		1905.42
101.008	3.93217	698.534	7.94626	70.9839	99.4102			30.5562			89.0882	598.304	517.285		476.735		586.999
368.108	3.60449	123.863	73.2367	64.0206	43.2539			2953.35			31.3754	3038.05	184.034		4.13697		1095.23
283.772	4.58753	26.4193	21.8317	44.5236	16.5888			3.03105			58.6958	4.01409	375.932		3.85025		774.105
471.901	5.44769	162.98	430.245	38.2977	602.032			3.27681			93.7986	4.01409	51.4049		97.7718		285
160.072	13.6807	550.012	2.82625	11.305	1409.97			3.72737			38.5025	4265.54	38.1748		1388.92		255.386
106.537	2211.97	10.5677	3.60449	10.9363	1240.97			8.1101			107.725	7.7005	328.664		3.31777		4.01409
220.775	3.76833	21.5041	272.712	21.5041	298.435			417.302			96.5839	18.8007	154.174		169.411		5.48865
70.3285	3.76833	1382.85	109.609	6.2669	310.437			3.44065			32.891	49.6436	118.006		6.4717		1025.27
105.636	4.75137	10.4039	9.3389	22.5281	576.473			3.80929			13.1072	2179.81	105.677		963.791		3.39969
159.622	6.02114	196.445	42.8852	101.335	5.28385			4.83329			7.82338	6.18498	764.234		3.76833		3.64545
89.0063	640.575	39.2807	197.96	122.88	1109.4			1569.14			21.0535	5.73441	140.165		3.64545		472.27
82.3708	4.75137	22.7738	54.9275	82.8623	86.0572			3.31777			7.20898	72.6223	360.244		317.891		4.21889
161.178	4.21889	522.61	4.95617	36.4955	1042.07			3.48161			77.4965	851.806	139.06		4.09601		777.136
176.169	5.12001	33.874	19.5789	186.082	6.51266			4.13697			123.618	15.6468	349.676		4.25985		1063.12
172.032	7.78242	41.2468	28.9588	126.894	21.1354			365.364			19.0464	26.5421	15.7696		1213.12		3.15393
368.928	32.6452	43.172	410.789	103.26	795.077			6.63554			8.27394	711.764	109.282		120.587		3.64545
123.536	40.1819	29.0407	242.32	124.437	464.324			654.829			8.35586	100.229	249.898		2077.82		974.236
191.284	373.925	26.2145	683.747	41.4107	430.204			3.89121			7.24994	399.771	426.968		3.27681		4.30081
273.368	95.2322	17.6948	4.34177	37.3556	4.38273			4.09601			14.377	64.3483	98.4681		3.97313		782.911
54.0673	131.359	103.056	1652.25	30.2695	11.1821			4.75137			33.7921	1102.85	427.214		577.456		3.31777
134.8	158.966	229.54	92.8975	20.4391	108.749			388.711			108.421	240.723	100.557		4.71041		2142.38
342.467	77.7832	147.784	393.463	16.0973	17.6948			5.93922			18.9645	21.7498	49.9713		1135.86		430.859
166.79	239.002	50.4219	3.07201	17.1213	174.941			894.61			6.71746	25.1085	44.114		30.3924		999.713
230.401	138.24	85.7295	4.17793	25.1905	156.509			3.56353			366.101	149.136	57.1803		16.0564		9.3389
166.052	119.767	130.376	258.09	59.0645	34.9799			3.72737			51.4459	1072.99	64.3893		4.62849		1740.93
121.57	64.4712	287.581	25.5591	27.73	299.992			5.73441			52.6747	7.2909	508.725		1113.01		4.71041
495.986	160.932	57.0574	66.9698	55.6238	1516.47			1504.01			102.728	7.33186	225.608		3.72737		724.257
100.721	368.313	445.769	1461.83	48.4148	6.22594			8.35586			31.0478	10.1171	172.237		3.97313		2.66241
116.736	151.634	103.547	282.42	59.0645	248.341			5.65249			37.6833	72.2536	120.996		243.262		339.887
84.5007	158.638	110.06	3.23585	19.8247	5.52961			9.05218			24.2893	941.263	917.957		96.3382		1496.44
24.4532	44.5646	67.1746	256.697	13.0663	281.068			797.084			48.292	678.75	834.931		5.16097		313.181
178.832	242.32	340.87	270.501	12.1652	87.6546			4.09601			62.669	162.284	180.429		974.687		3.97313
138.158	195.134	23.2244	664.578	10.5267	587.081			5.73441			161.547	7.00418	208.528		3.44065		5.36577
49.8484	387.155	248.177	65.0856	73.8101	323.421			534.98			21.7908	164.291	353.486		3.68641		1289.59
64.717	1531.09	514.582	54.5998	14.377	34.4884			5.07905			50.0532	51.7736	161.751		309.208		408.331
63.7749	4.71041	8.80642	40.2228	34.6522	758.622			2438.03			54.8865	148.48	48.8244		10.3219		1983.45
165.274	3.85025	17.1213	275.784	13.8445	47.3089			3.48161			235.029	110.06	17.3261		67.3794		347.055
83.3129	25.7639	29.1636	299.582	28.5902	1077.46			3.60449			27.4433	509.789	19.6609		776.808		949.906
92.0783	30.9658	94.2902	183.665	35.6353	5.81633			4.46465			10.1171	2079.09	24.6989		120.914		380.396
214.672	211.805	118.416	26.0916	33.1367	338.167			638.937			35.1847	5.07905	364.299		1032.73		375.358
116.45	192.922	629.68	68.0347	45.0152	938.888			2623.82			42.8852	16.0564	316.335		3.48161		53.3301
685.877	646.883	71.885	435.652	13.5168	4.42369			3.11297			47.0222	16.466	188.58		3.39969		1844.19
157	4.09601	307.528	97.3212	14.2951	5.07905			3.07201			31.0887	744.982	95.1503		207.913		730.319
202.261	3.68641	521.914	68.6491	7.65954	733.432			3.93217			16.3431	10.1581	438.519		5.28385		10.8135
62.5461	5.81633	49.275	67.3384	36.7003	421.848			1509.01			110.019	14.7456	320.881		37.3556		510.363
63.652	9.87139	57.1803	45.5476	13.2301	7.04514			3.31777			144.548	913.615	53.1662		9.58466		5.85729
1050.71	88.0642	470.345	1690.92	11.8375	1499.22			3.52257			36.3316	267.92	345.58		287.786		1490.58
48.7835	78.9301	36.7822	137.667	20.6439	4.21889			4.79233			78.8892	8.35586	174.777		620.791		6.22594
132.424	431.433	117.842	14.7047	98.4681	206.767			1403.33			33.2596	10.4448	167.158		51.8145		489.965
78.029	118.907	169.124	231.056	17.6538	6.4717			4.34177			163.718	508.315	537.192		867.084		2.99009
36.7822	1066.97	280.208	540.96	42.3937	7.12706			4.01409			49.6027	526.788	439.338		3.52257		843.696
129.557	4.83329	7.41378	139.264	25.4362	157.328			175.965			62.0955	562.341	404.563		279.88		219.874
98.3862	5.73441	310.396	160.031	15.2781	531.867			1683.67			135.701	33.2186	64.3893		4.34177		981.937
34.7751	33.2596	66.2734	36.8231	8.47874	154.01			5.61153			100.844	351.888	97.7718		5.77537		246.375
45.0971	24.2074	57.0984	6.30786	25.9687	278.447			5.28385			43.7044	447.489	542.148		444.704		847.751
136.397	42.2708	35.4715	16.3431	57.508	927.787			5.48865			59.1464	14.6228	137.544		1661.06		156.959
215.368	296.142	43.5406	58.2043	37.3556	5.40673			11.4688			249.652	15.401	242.73		3.19489		165.192
67.9528	238.142	450.725	380.192	8.1101	7.20898			837.266			44.6056	56.9755	220.365		2.99009		123.577
35.3895	407.635	371.14	2.99009	12.37	874.867			52.4289			33.1777	397.845	291.513		359.671		62.4232
329.196	1494.39	117.064	4.21889	75.94	5.57057			1875.24			46.4488	397.231	70.7381		984.722		30.5153
170.845	3.93217	155.034	241.378	19.0874	206.767			3.76833			58.4501	677.726	147.293		4.21889		14.336
342.426	3.56353	202.998	349.144	15.9744	6.18498			3.72737			95.3961	83.1081	117.76		4.21889		229.663
146.105	4.50561	131.359	338.699	30.0647	850.618			4.34177			129.229	471.697	614.074		756.615		95.1094
175.678	14.6228	117.515	288.851	58.2043	416.441			12.37			176.415	1409.4	281.519		4.50561		65.0856
298.64	79.012	101.458	72.2536	49.6027	13.5988			521.299			102.318	4.99713	542.721		497.092		29.9828
181.699	1019.05	7.4957	15.0733	89.293	151.921			5.98018			159.99	4.21889	915.827		3.85025		253.42
314.246	248.915	253.338	310.887	39.7313	4.46465			13.7216			55.5419	1029.66	58.6958		308.307		1006.31
278.365	2164.5	479.684	2.49857	12.2471	5.16097			8.23298			53.371	4.87425	560.826		4.13697		4.01409
61.5221	14.4589	105.267	3.03105	17.1213	654.01			33.0958			38.8711	4.42369	350.987		5.81633		4.05505
249.775	30.3924	1578.81	5.28385	26.4602	463.627			12.329			46.3259	10.4858	50.9134		221.512		190.301
139.551	98.0585	77.6194	481.076	14.7456	15.2372			4.75137			325.838	150.774	25.5591		5.12001		121.733
132.588	915.049	59.8018	734.251	9.21602	292.865			841.689			59.0645	541.124	19.2922		545.097		20.6029
30.802	370.075	251.004	123.29	32.1537	5.48865			4.95617			352.052	5.65249	49.6436		7.33186		14.8685
148.562	54.4769	251.618	109.609	17.5719	53.1662			5.16097			67.6251	1295.28	397.886		1021.71		8.84738
819.407	341.853	449.414	105.554	91.423	11.1411			6.10306			97.567	28.713	414.762		318.465		141.435
8.39682	84.8284	306.177	35.7172	32.3994	35.3895			1486.28			112.313	41.5745	454.78		10.5677		59.0645
73.6053	287.581	53.0433	14.6228	43.5406	127.345			156.263			57.7128	427.501	253.092		1108.01		268.248
989.105	72.3355	516.548	507.004	14.2132	28.8769			1604.04			87.0812	102.318	169.862		4.17793		80.3228
120.546	561.153	32.7271	3.60449	5.57057	292.25			3.31777			83.2309	457.606	997.379		900.18		127.959
245.843	9.7485	448.8	84.3778	17.6128	259.196			3.31777			64.3893	690.383	207.709		3.85025		134.677
171.049	24.3303	5.98018	27.73	47.186	510.281			4.25985			40.1409	920.578	32.7271		3.72737		697.182
415.704	25.4362	17.2852	20.1114	50.5038	229.213			5.52961			11.1821	6.6765	212.419		273.695		634.308
50.5448	122.02	268.453	284.755	121.938	715.696			9.95331			63.1605	6.8813	256.001		22.6509		2.90817
63.8568	78.029	8.68354	2.82625	91.382	4.09601			765.708			21.4631	11.3459	83.1081		718.031		368.395
107.438	180.306	13.7216	3.80929	73.3595	10.6087			8.56066			45.9982	23.4292	95.3142		3.35873		5.48865
335.463	206.971	7.9053	330.22	52.1832	344.188			56.8526			37.0689	214.426	2562.18		3.27681		246.539
173.138	129.065	8.39682	62.4642	196.199	1053.29			2077.09			55.0504	224.83	375.973		433.686		4.13697
143.688	303.228	311.788	27.2794	177.275	25.1085			4.58753			33.0958	933.522	22.2823		5.52961		6.30786
262.472	168.51	314.041	27.0746	315.311	425.985			4.21889			47.3089	875.727	322.643		826.37		1721.06
161.137	238.92	280.249	20.1114	832.023	10.1581			35.1438			18.0224	9.66658	147.252		3.19489		10.4858
86.0981	170.763	33.6282	715.45	105.554	362.251			219.137			24.2484	21.0125	30.761		3.31777		1637.18
202.425	585.852	57.5489	8.60162	33.4234	4.34177			252.109			136.602	709.06	16.6298		231.425		248.751
104.612	231.138	442.861	88.31	40.2228	583.026			153.559			106.414	5.61153	76.3087		4.05505		140.739
201.647	1042.31	918.407	123.003	28.5492	4.79233			196.731			272.057	350.496	316.499		5.16097		86.5487
111.411	53.0024	11.305	20.7668	17.7767	6.10306			13.0663			86.9583	969.362	159.253		812.403		163.595
157.614	387.36	10.281	27.73	41.6974	3457.03			6.55362			58.2043	6.22594	119.604		4.21889		436.184
63.3653	9.91235	8.43778	37.8881	9.46178	47.8004			4.79233			125.584	6.84034	205.661		1189.11		91.9964
178.914	11.5098	912.55	6.92226	64.3893	234.292			32.2356			91.1362	12.1242	81.7564		3.39969		129.065
135.947	14.7456	13.1072	215.737	52.8795	143.033			11.1002			57.6309	1071.52	85.6066		3.35873		99.7788
51.4459	45.9982	11.7146	377.898	79.6674	237.405			163.062			81.06	6.59458	161.137		1380.72		67.0927
87.3269	49.316	72.1307	3.89121	16.0154	1226.67			127.468			214.59	5.89826	95.9286		3.39969		89.334
271.484	104.039	316.253	199.23	11.0183	11.7556			121.324			68.5672	7.04514	80.6095		198.247		48.1281
128.492	263.578	7.45474	6.22594	16.5888	13.8855			248.792			96.0105	233.104	70.3285		4.83329		9.7485
208.364	307.324	24.3303	28.3034	16.7117	24.0845			115.426			20.8487	318.629	456.951		191.939		106.66
186.778	67.789	357.254	554.108	9.1341	5.98018			142.869			21.4221	592.611	196.076		6.0621		127.918
184.525	287.745	129.434	2.74433	12.329	11.9604			117.351			15.1962	1140.82	239.494		71.1067		54.7637
85.5657	274.392	747.522	3.39969	58.491	1.92512			179.897			41.3287	288.687	31.7441		15.2372		59.8427
101.909	472.393	290.12	6.96322	75.1618	1.92512			32.3585			15.2372	375.768	528.754		944.622		59.6379
48.6606	5.48865	849.554	361.514	34.4884	664.905			63.7339			60.0885	348.243	156.263		3.72737		43.2129
43.09	5.32481	36.0039	30.4334	46.5307	517.08			10.5267			166.298	72.2536	625.256		3.52257		35.6353
77.2508	10.3629	612.435	231.302	74.3426	5.07905			9.7485			171.336	930.614	412.222		287.745		17.5719
16.5479	60.2114	339.027	159.867	31.3345	70.0418			10.7725			93.5529	75.7762	19.1693		26.8289		106.906
27.6481	105.145	31.826	243.385	72.0898	5.65249			9.7485			23.634	55.46	8.64258		5.36577		33.7921
14.377	674.039	72.9909	73.2776	26.2964	453.838			158.761			20.3162	830.999	9.83043		3.60449		13.5988
36.4545	8.64258	76.6364	31.4574	23.3473	297.739			366.388			143.197	981.486	234.21		241.378		92.6518
292.127	13.1482	36.2087	90.1942	54.8046	486.36			164.946			24.9447	8.35586	66.1915		2045.88		38.3796
59.3102	50.8725	198.001	198.616	108.831	14.4589			90.358			58.4091	141.067	59.4331		3.76833		22.6919
229.459	78.6844	49.9304	38.5844	24.4941	453.469			27.0337			25.1495	237.2	322.97		3.80929		10.6496
256.205	245.31	42.8443	254.526	59.3102	619.194			161.383			18.1453	848.857	1093.47		2397.6		712.419
60.9486	682.068	38.3387	295.24	66.1096	10.6087			17.0394			11.7146	36.2087	161.588		6.8813		371.549
121.078	3.44065	116.531	61.8498	119.89	9.95331			245.228			14.9914	52.2651	557.508		794.913		5.32481
145.654	3.44065	188.171	499.386	58.2043	140.288			203.899			92.2012	129.311	327.722		5.07905		1181.04
54.0264	4.54657	29.0407	159.744	53.4529	48.5787			243.795			354.346	875.276	49.8894		4.71041		25.641
58.8187	7.9053	46.7764	236.176	69.0587	10.9363			459.654			26.5831	144.835	943.434		1999.22		328.623
175.678	362.579	34.0378	3.76833	17.8176	506.103			190.751			124.724	523.306	170.312		4.46465		141.353
66.1096	136.397	183.051	113.664	20.3981	312.075			163.881			89.2111	374.171			173.958		49.6436
119.726	141.845	24.4532	117.924	40.9601	127.55			102.646			76.8412	215.573			301.507		128.164
145.326	458.876	215	296.101	36.2087	775.293			725.731			128.205	396.371			54.8456		121.57
148.972	66.724	86.8764	35.1847	16.0973	6.10306			394.773			531.089	60.7029			57.508		113.541
45.4657	580.609	36.0039	31.0887	10.9773	377.652			418.776			79.7493	48.9064			1385.56		111.78
91.9964	1106.7	211.272	478.947	9.91235	95.3551			179.692			91.7916	388.834			3.39969		148.48
61.8088	307.938	683.256	3.80929	77.046	640.862			156.836			158.024	442.041			9.17506		37.3556
92.4879	202.056	294.298	377.611	21.7089	230.073			244.941			143.197	95.6418			136.315		336.037
88.8425	265.79	145.531	3.15393	8.76546	323.953			48.9883			438.191	348.079			5.57057		130.949
320.595	133.161	122.676	3.93217	8.43778	117.76			637.134			67.7071	315.106			102.81		657.942
85.0332	134.841	98.2633	4.42369	57.508	523.88			498.771			121.037	98.7139			25.682		338.208
68.772	308.716	67.789	83.2309	110.101	30.1876			150.815			110.715	1155.53			695.625		864.791
71.1477	160.195	380.437	115.303	58.3272	6.18498			395.716			53.4939	819.776			3.72737		265.421
109.732	375.154	22.4871	24.0436	50.8315	11.9604			479.93			110.592	4.66945			224.953		1952.73
5.07905	311.706	626.731	95.1094	24.3303	566.888			54.6408			264.848	309.372			4.54657		45.6705
113.992	950.602	54.395	119.644	10.8544	121.037			199.23			104.039	536.823			1483.86		2.99009
208.897	3.52257	58.0405	92.6518	10.5267	2.25281			518.965			23.1015	7.53666			3.35873		332.678
137.093	3.44065	83.5177	16.0973	16.9165	3.80929			284.058			152.085	7.12706			3.19489		600.147
56.1153	10.3629	267.019	11.9194	15.5239	449.906			584.828			25.3133	23.0196			176.292		3.39969
98.3862	12.37	36.2497	356.353	142.05	350.045			727.738			34.9799	575.776			528.754		4.13697
340.624	290.53	307.283	33.9559	107.766	282.502			295.486			21.2993	164.578			6.55362		517.326
120.095	1205.41	573.81	13.312	117.105	256.369			1399.65			33.7102	141.271			54.6408		1698.21
87.5727	3.35873	84.9103	427.542	307.651	581.06			795.527			51.1182	308.266			380.929		5.07905
86.7535	6.8813	49.8894	3.48161	78.3976	17.49			1467.07			41.8203	45.5886			6.55362		339.846
65.0446	1769.6	967.191	3.89121	468.584	13.7626			5145.86			38.4615	840.051			45.9572		1021.75
54.8456	3.60449	331.9	463.668	138.363	22.1185			1929.92			304.989	203.08			3.89121		2.99009
140.329	3.31777	333.088	40.5505	291.431	404.317			5.48865			72.0488	697.264			1078.23		7.94626
93.1023	4.17793	34.898	19.7428	262.718	661.219			10.4448			22.6509	690.587			5.28385		618.539
238.634	272.835	51.2001	417.834	144.507	178.873			1923.94			50.258	223.274			25.3543		3.15393
31.4983	4.38273	67.2565	3.89121	189.072	7.00418			406.898			530.31	246.703			524.371		3.31777
44.4417	4.05505	43.09	461.62	118.129	20.0705			232.121			21.586	889.326			3.85025		1610.59
136.848	4.66945	29.2865	46.9812	236.667	220.57			1065.7			18.1863	332.105			3.56353		1371.75
138.117	14.336	83.8453	415.95	362.702	581.429			1161.71			11.4688	1299.42			218.276		364.995
89.293	158.147	112.558	25.8458	130.253	185.263			887.483			10.4858	235.357			4.38273		3.89121
84.2549	187.106	766.691	137.339	335.586	13.353			462.317			6.59458	2059.39			482.674		1137.58
88.269	1044.11	850.045	28.4263	32.5633	840.01			7.04514			110.428	38.5025			6.22594		81.4696
43.8683	3.56353	195.871	29.6142	40.9601	1263.41			5.85729			14.2132	174.982			143.647		17.6538
73.0728	3.35873	5.93922	75.2847	110.387	32.4404			36.0859			24.1255	324.691			30.1057		22.569
216.884	60.2933	7.78242	10.8135	61.563	372.204			392.766			34.4065	662.325			1241.71		58.7368
223.642	37.8471	7.16802	544.974	46.9812	1152.37			171.254			10.4448	843.614			3.44065		83.9682
107.889	413.492	18.9645	3.11297	191.734	1338.9			44.5646			49.7665	244.204			3.76833		43.131
83.6405	4.42369	35.1438	441.96	12.8205	259.892			906.734			17.6538	175.145			226.427		26.7469
61.8498	4.34177	287.95	12.2061	18.9645	6.43074			1097.44			138.691	1037.6			382.69		48.6606
31.0478	9.01122	59.8837	146.678	8.39682	424.92			4.34177			86.8764	42.2708			5.36577		90.5628
141.681	40.2638	50.0942	71.1887	13.1072	210.945			4.21889			49.3569	75.4076			18.0224		88.9653
54.7227	1113.09	270.787	660.277	31.2935	66.8879			4.50561			64.9627	251.454			1137.75		245.023
122.716	3.93217	688.376	2.53953	17.49	916.646			14.2951			223.028	771.074			3.60449		85.238
57.7947	3.93217	105.39	3.80929	11.1002	161.383			1104.69			37.3147	860.49			542.721		288.564
80.6095	5.93922	182.928	4.62849	11.264	4.75137			94.6178			74.3016	253.42			8.64258		156.918
57.2213	14.7047	280.454	111.985	31.9079	863.48			712.952			100.926	72.3765			23.5521		236.012
285.533	73.3186	3.52257	103.219	18.7597	904.563			1016.83			61.7678	495.945			596.01		941.222
128.86	308.184	4.42369	414.639	8.7245	5.36577			202.548			59.2693	669.042			3.44065		935.283
136.561	259.81	232.162	512.001	21.2583	41.042			166.912			118.989	494.511			3.23585		1021.55
175.023	143.688	119.317	3.52257	22.7329	4.21889			47.3908			57.2213	177.439			221.266		2.94913
48.0052	358.073	44.8104	52.347	45.179	1125.09			642.91			238.388	159.253			484.886		8.02818
86.0572	909.437	59.3512	720.611	144.384	986.074			693.004			46.7355	138.158			4.25985		1362.46
47.9643	1112.23	105.472	2.62145	51.364	58.9006			25.4362			41.3287	439.051			4.87425		143.811
46.9403	3.68641	720.12	3.19489	21.6679	652.986			101.212			67.6661	830.179			271.361		64.3893
85.0741	3.52257	253.42	4.13697	70.9839	182.354			47.5137			283.813	82.2889			1574.55		68.4443
97.2802	4.66945	142.5	6.2669	86.5487	6.02114			1706.52			65.7	62.1365			3.27681		108.462
94.6588	9.05218	625.215	228.885	89.4159	17.49			302.163			28.5902	129.27			151.593		169.698
98.4271	245.351	183.174	432.334	52.1013	693.332			104.694			269.558	221.226			1227.21		87.6956
34.4474	827.804	123.085	354.223	44.2369	2.99009			179.61			388.138	82.3708			1337.63		156.754
176.989	4.79233	118.375	44.0321	79.9132	353.691			66.6421			72.3765	53.5758			21.586		241.992
79.9951	3.85025	72.7451	49.5617	42.8443	1419.51			314.737			87.6546	1623.58			3.48161		2865
43.09	5.07905	73.933	25.6001	53.0843	5.36577			678.095			30.9658	217.949			1253.46		8.97026
339.805	6.22594	190.096	553.494	82.8623	978.947			307.979			142.787	611.862			3.97313		1683.62
130.294	9.01122	159.417	349.594	55.0504	4.91521			997.133			38.8302	407.553			4.25985		3.44065
120.013	39.2807	152.372	46.244	46.0801	329.688			3206.36			263.66	176.169			120.259		1486.11
65.9048	83.19	338.699	26.2964	41.2878	155.198			31.2935			178.054	674.449			97.8947		3.93217
1364.75	151.88	315.925	352.953	110.265	337.143			549.93			71.7211	960.719			1201.07		6.18498
84.9513	1003.19	226.755	316.99	87.0402	488.859			132.916			31.867	885.066			7.61858		1028.63
238.265	67.6251	377.488	4.17793	164.332	50.1761			2535.84			154.051	458.098			1052.55		1272.38
190.833	1068.28	47.8004	48.7016	121.283	37.2737			5.73441			83.8863	674.121			3.72737		1808.14
525.231	3.72737	361.268	78.8482	119.194	763.578			3.44065			34.7342	9.17506			3.89121		133.53
506.922	3.72737	50.5857	39.6903	137.257	143.934			4.83329			24.1255	23.2244			437.864		183.051
88.8425	4.75137	47.5137	303.105	251.044	5.61153			5.98018			48.9883	192.062			992.545		1187.47
546.817	1736.63	31.7441	4.01409	174.531	1414.07			802.941			45.3019	128.041			3.44065		4.05505
362.292	4.30081	40.0999	191.57	152.904	6.92226			2.99009			46.6126	614.647			3.44065		1696.24
309.822	4.46465	20.3572	14.0903	143.442	755.796			3.27681			106.496	328.828			314.205		2.58049
250.307	48.292	460.801	250.43	375.236	7.00418			5.73441			28.2215	211.395			309.085		198.943
179.159	86.9583	837.347	3.39969	47.7595	4.99713			13.8036			44.4008	510.773			5.36577		449.128
207.75	392.111	202.548	119.071	80.6914	152.413			15.3191			25.2724	451.298			69.5912		2.74433
237.528	302.245	280.945	117.392	34.0378	6.79938			20.4801			12.7796	1047.76			5.52961		839.15
113.337	277.013	86.9993	47.5956	21.4631	9.37986			254.813			46.2849	1830.34			11.7965		511.018
241.828	1071.8	55.1323	184.853	25.3543	217.13			228.926			75.8991	12.2471			654.788		143.483
288.277	33.6692	134.39	39.6494	40.018	169.083			26.8698			19.0055	142.541			4.09601		106.21
212.911	62.587	34.9799	63.2424	114.402	24.3303			25.8458			44.155	72.3765			723.233		202.097
299.05	528.549	125.748	7.53666	59.8427	389.694			7.20898			49.8484	841.935			5.28385		95.437
90.317	13.1072	585.525	10.8544	106.619	330.63			360.039			108.749	632.67			7.12706		634.882
395.347	16.7527	260.465	576.268	21.586	681.822			231.138			49.316	703.039			420.742		2.70337
43.0081	57.3851	282.789	2.74433	21.9956	3.48161			606.496			228.23	117.965			11.1002		13.312
179.364	80.3228	498.935	3.23585	35.1028	64.7579			904.358			36.2087	486.401			1070.78		1010.49
51.5278	602.441	495.74	4.54657	108.421	6.51266			22.3233			17.5719	401.86			3.89121		3.15393
81.4287	72.4994	632.997	826.247	50.5038	580.732			991.89			19.2922	26.0506			1941.02		1293.52
148.398	136.315	601.745	489.227	52.8795	423.487			4.99713			31.5393	2405.18			3.23585		2.99009
64.635	892.93	784.796	3.39969	44.5646	542.599			998.689			54.5589	275.129			582.903		549.93
92.5698	87.0402	22.7329	321.701	34.9799	10.7315						12.9844	2452.94			4.21889		6.43074
162.325	252.232	454.166	40.6734	134.267	5.65249						5.44769	478.987			4.25985		686.532
59.3512	1371.92	522.446	27.4842	156.877	21.9546						59.1874	256.287			35.8811		5.52961
356.599	86.6306	588.597	66.9288	109.445	701.892						30.3105	463.505			340.952		1808.02
322.643	481.568	37.97	40.3867	187.72	15.7696						29.4913	402.515			1325.47		3.31777
113.623	12.4109	151.593	72.2946	130.048	35.3895						18.9236	135.578			308.962		4.25985
833.006	1570.94	171.213	344.188	102.195	350.782						222.495	1278.61			4.46465		1643.36
210.043	4.42369	265.667	263.578	142.091	739.78						85.0741	1050.22			856.803		8.80642
163.39	3.89121	373.802	9.05218	173.384	486.319						206.152	213.771			4.99713		584.46
80.6914	5.44769	312.116	10.7315	267.347	564.307						63.0376	147.948			43.4587		5.52961
44.5236	128.697	124.109	99.615	261.121	13.5988						31.3345	680.347			3.97313		1474.24
225.526	361.637	200.745	64.2254	240.231	820.226						97.8537	700.172			4.71041		13.312
113.992	8.02818	601.745	49.5208	125.748	92.3241						12.4109	103.957			963.095		465.757
125.911	8.47874	379.7	111.166	186.86	151.02						12.9844	237.282			3.76833		2203.29
82.9852	23.3063	542.025	19.9885	350.086	4.38273						265.626	190.464			3.80929		437.904
283.116	77.7832	362.947	337.061	56.8526	5.93922						59.0645	84.4597			762.309		4.25985
237.651	147.006	167.445	52.6337	86.4668	162.407						50.5857	345.99			3.35873		1969.65
97.9766	1409.72	263.701	17.3671	41.1649	298.19						41.2878	1073.2			3.39969		1319.86
68.2805	4.87425	217.293	101.622	31.5393	638.814						86.3029	54.8046			174.449		7.7005
104.571	5.12001	322.848	683.46	46.2849	11.1411						45.9163	787.54			4.46465		533.382
71.1477	11.1411	73.0728	3.27681	57.3441	149.095						10.24	456.705			342.959		2.99009
97.485	11.0592	229.745	4.30081	53.6577	695.666						97.0754	1202.42			6.0621		1434.75
44.9742	142.623	116.818	196.486	57.9995	140.247						19.9066	17.8586			62.3822		729.295
303.883	753.748	357.991	18.9645	200.172	7.65954						25.2314	724.871			991.685		362.661
251.167	277.669	6.02114	43.2539	37.6014	262.145						15.1143	62.0955			3.48161		58.8187
200.623	83.3538	6.43074	567.052	24.2074	21.4631						137.38	184.075			474.891		963.832
529.123	135.496	13.5168	4.58753	24.4122	181.412						34.898	688.785			71.4344		43.3768
115.999	471.697	12.2061	95.5599	42.8033	1583.8						159.089	79.4626			1409.36		15.9335
132.997	1322.85	16.6298	143.688	23.5521	1308.35						336.856	139.182			4.34177		24.2074
348.734	4.38273	38.4615	17.8586	136.561	10.24						94.8636	1014.09			4.50561		83.3129
148.357	3.97313	11.6736	163.103	74.0149	9.09314						292.906	779.553			1169		36.7412
87.4908	12.9844	20.6439	24.0845	40.3867	773.695						59.1874	406.078			4.79233		15.442
313.14	150.365	1327.76	8.35586	68.7311	4.25985						27.2794	518.227			5.65249		28.3444
117.924	281.191	332.76	98.3862	97.6899	187.433						285.205	1028.59			38.3796		268.371
90.5628	933.522	7.00418	31.6212	108.872	4.54657						26.2145	1061.36			1364.67		148.357
231.22	6.59458	14.7047	23.3473	173.466	107.111						33.5873	250.635			3.80929		845.58
341.362	6.2669	24.9447	118.293	197.96	19.8247						49.1112	117.719			3.52257		3.89121
113.828	87.1221	104.039	35.1847	117.719	218.645						22.0365	1067.26			472.27		608.094
868.027	172.729	359.015	290.202	114.443	267.51						27.4842	28.4673			3.85025		572.827
158.475	842.713	83.9273	52.1013	164.332	86.3849						34.2426	609.773			655.607		2.82625
67.9938	31.9898	1338.78	43.2129	544.933	527.771						138.322	242.484			8.97026		14.2951
115.835	83.8044	237.651	66.765	121.815	258.786						94.6588	170.967			249.283		501.27
75.3666	296.06	268.453	35.6763	446.301	408.29						75.3256	625.788			576.186		8.1101
177.849	888.875	245.351	155.485	200.213	3.80929						59.6789	10.3219			1410.22		690.096
353.117	436.717	152.167	226.837	139.264	451.094						145.449	17.7767			4.91521		11.1411
57.5899	382.363	411.772	24.9037	131.195	469.649						24.9447	799.992			26.1325		360.367
239.78	208.774	427.173	37.0279	142.418	306.545						44.6056	258.458			24.0845		991.726
221.881	1162.53	15.3191	42.2708	84.7465	137.954						34.1198	335.381			7.20898		4.21889
120.668	24.6989	14.0493	339.477	89.0473	499.795						31.867	308.757			310.396		1261.12
482.633	78.3567	80.8143	4.34177	74.4655	24.9037						25.0266	1930.24			350.209		3.85025
495.249	305.685	42.2299	385.639	334.972	13.5988						38.3796	269.313			127.181		4.01409
71.5163	471.369	23.2244	366.265	60.9896	7.9053						53.8216	9.7485			1393.63		5.61153
150.16	1072.21	1518.31	4.30081	71.1067	294.135						25.3133	22.61			5.36577		555.542
25.1495	9.46178	197.223	197.428	78.1519	105.8						33.0548	33.5873			29.4094		1392.93
118.825	78.7663	241.173	137.954	140.37	331.49						219.055	925.125			82.125		4.50561
38.8302	279.512	87.8594	30.3924	171.049	508.274						305.685	37.9291			8.19202		1368.48
188.089	1037.11	853.281	99.9017	149.586	470.222						39.2807	91.7097			1294.42		172.729
115.712	4.87425	283.608	137.298	222.536	595.068						38.0519	875.481			3.76833		7.00418
119.644	4.95617	225.854	498.444	75.3666	650.487						43.8683	70.5333			3.76833		1764.07
181.494	13.1892	84.6645	3.68641	69.796	34.939						179.282	1323.54			741.828		4.17793
74.1787	40.8782	162.448	4.54657	63.8158	306.341						86.7945	41.2878			5.61153		249.16
176.087	64.3074	14.0084	89.0882	19.5789	11.5917						32.7681	244.45			509.585		617.76
139.428	1184.53	349.185	177.849	10.9363	150.651						20.7258	396.862			639.715		5.73441
3513.15	685.426	1650.36	145.367	15.4829	88.6377						30.6382	951.053			10.4448		458.835
423.978	655.894	165.602	18.1453	18.5549	10.5677						27.2794	606.783			17.9405		6.2669
437.741	5.12001	338.535	33.5873	15.401	177.767						122.635	3679.53			5.98018		933.153
309.454	5.57057	40.5915	243.958	49.316	53.1253						31.9898	24.4532			1380.4		4.46465
181.658	100.885	47.0222	14.6637	12.329	9.95331						36.3726	3079.54			3.89121		1004.14
236.094	208.978	84.9513	19.7018	100.926	696.527						309.003	161.219			4.34177		388.261
503.359	27.0746	177.275	554.436	55.0094	488.408						16.425	1585.16			263.578		1579.05
274.187	296.387	257.844	3.19489	58.1224	111.043						223.601	2406.65			6.22594		1121.69
151.389	258.663	12.5748	3.64545	33.9559	74.916						355.779	423.978			52.1422		14.418
193.004	354.387	53.8625	139.223	15.2372	63.1605						71.885	256.492			992.955		223.765
204.145	480.626	504.26	340.706	10.5267	365.405						61.4811	1938.97			3.60449		136.602
95.437	752.15	61.2763	3.39969	36.987	350.782						174.449	6194.4			302.449		44.6465
66.0277	5.20193	406.57	4.01409	81.2648	609.036						62.669	182.313			5.52961		1004.55
69.8779	4.42369	344.434	344.761	73.0319	107.029						28.5902	108.79			15.2781		4.95617
90.4399	5.52961	496.969	315.188	30.9658	90.7676						43.131	704.063			4.42369		704.391
85.6885	10.8135	841.321	111.33	51.2411	216.351						104.121	48.6196			663.39		2.90817
75.2028	13.2301	19.0464	155.362	30.5562	198.083						74.957	146.35			3.72737		684.607
2117.43	374.457	39.5675	16.1792	28.0167	1080.69						137.503	221.185			556.32		435.119
841.771	14.0084	40.6734	80.118	6.18498	425.903						176.948	620.464			4.46465		5.03809
7.7005	22.569	70.82	14.2541	14.9504	31.785						34.0378				630.908		263.496
1264.97	1261.33	57.467	16.8756	7.04514	230.892						53.1662				62.9147		3.44065
175.023	3.56353	261.325	7.98722	67.789	339.682						59.9246				11.0592		3.89121
685.959	3.27681	473.949	23.4701	33.5054	584.501						53.2891				26.0506		878.594
556.484	4.58753	310.969	26.0916	16.3431	314.41						75.981				62.1365		4.38273
509.708	17.8996	1301.75	6.43074	76.0629	1133.16						26.9517				145.367		1903.13
96.7478	1256.29	425.944	58.0405	35.3895	158.679						45.9982				95.9286		77.6194
937.741	4.54657	606.373	277.259	88.9244	57.508						32.7271				16.2612		398.992
6.8813	4.25985	35.922	265.913	51.5278	196.527						85.4018				3.80929		1038.87
29.8599	14.5818	460.883	24.5761	15.8516	226.55						44.196				160.686		95.8466
239.002	12.7796	126.116	179.119	21.0535	827.435						20.6849				60.58		74.5884
158.925	648.153	194.274	220.816	21.2583	102.769						10.8544				643.319		135.455
186.082	119.03	100.885	22.5281	50.8315	468.133						15.4829				6.71746		56.3611
445.687	764.93	177.767	8.60162	25.4362	185.795						7.04514				211.354		61.3582
627.058	175.883	139.223	7.24994	60.7438	152.454						19.1693				1471.37		1127.1
191.611	958.753	946.547	361.964	16.1383	274.965						22.2823				2219.18		90.0713
122.266	851.888	201.442	86.262	16.0973	266.364						60.0066				8.06914		148.603
175.678	8.97026	435.856	282.461	13.5988	670.271						26.0506				195.544		76.8821
478.332	102.359	356.066	589.375	5.12001	235.275						10.0352				303.596		30.3924
9.3389	230.81	218.809	48.1281	36.4955	471.983						30.1876				5.32481		93.5529
68.4034	352.83	316.949	153.641	9.66658	113.459						99.9836				153.969		188.457
61.604	1113.05	726.878	1993.49	35.1847	42.2299						39.2398				104.08		413.492
244.778	4.42369	187.884	90.4809	12.0013	45.7934						64.1845				105.063		273.04
157.287	3.89121	202.507	21.2173	24.9447	44.4008						38.4615				34.4474		245.351
167.117	6.84034	30.4334	22.1185	18.514	326.042						312.198				129.27		38.2158
1755.51	117.842	1684.32	62.2184	43.8683	69.3045						35.6763				132.383		229.868
140.329	295.281	42.8033	23.8388	82.9852	252.724						101.704				55.7467		141.968
484.722	265.217	49.0292	360.408	76.7592	15.6468						105.022				41.2059		460.31
3.97313	821.578	906.857	51.323	102.277	70.0827						47.5956				12.0013		119.644
3.76833	12.37	9.21602	43.9092	97.4441	187.843						107.807				90.9314		57.9176
5.89826	768.821	14.4589	14.9504	147.866	471.287						35.5534				151.43		52.4699
941.837	72.8271	39.8951	43.0491	103.957	292.988						106.169				126.239		24.2074
187.843	426.927	28.5492	21.7908	117.187	528.754						56.3611				143.156		45.9982
376.178	187.966	116.163	27.771	161.178	40.3867						11.9604				23.634		133.776
1087.98	254.444	985.091	5.28385	270.009	29.4503						37.0689				386.459		86.6306
2694.23	2099.45	303.637	7.74146	98.4681	203.08						15.1143				249.365		214.344
3.23585	4.17793	227.411	15.5648	48.4558	279.266						94.3721				43.2539		65.4542
3.03105	8.02818	215.082	106.742	33.7511	14.418						42.8852				209.224		116.163
3.89121	7.78242	932.784	6.22594	93.5119	15.1552						295.609				523.347		143.483
4.66945	65.2085	25.0266	40.7963	164.987	77.005						22.5281				61.1125		837.02
110.715	724.298	334.48	32.3175	59.1874	153.928						14.7866				231.998		2.86721
722.168	5.89826	75.4076	186.573	116.859	514.213						143.729				10.3629		7.65954
446.752	5.52961	130.827	15.8106	36.4135	485.951						18.5959				20.1933		352.175
41.2059	10.4448	146.309	65.1266	25.3953	220.324						79.2988				95.437		2.70337
146.883	508.847	279.02	12.7796	19.8247	195.011						71.9259				79.2168		580.323
271.156	3.85025	130.458	35.5124	104.776	111.33						35.5124				43.9912		1488
228.312	3.85025	338.945	50.9953	40.3457	237.896						82.0431				36.987		2.70337
1587.61	5.20193	167.24	31.6622	80.6095	763.414						174.859				28.9588		13.6397
3.52257	1078.23	544.155	3.60449	25.9687	86.5487						150.078				41.1649		326.329
3.52257	3.85025	231.547	239.658	30.3514	72.4994						102.155				42.1479		5.48865
4.62849	3.76833	215.655	21.0945	25.6001	15.1962						79.4216				64.9627		500.532
92.9794	4.87425	309.003	32.4404	28.8769	5.81633						128.779				17.5719		139.346
	43.3768	191.325	26.9108	126.116	585.689						217.703				51.2821		61.8907
	210.002	119.153	25.682	70.1237	130.499						110.51				47.1041		75.1208
	290.12	80.4456	30.2286	44.9742	21.9546						71.1477				241.501		47.7185
	92.2422	329.77	12.5338	48.9883	9.01122						34.6522				24.8218		25.682
	1140.17	125.748	224.379	95.3961	107.889						114.279				215.204		74.5884
	3.60449	212.091	203.613	38.1748	101.622						79.6674				1450.27		1199.11
	3.23585	549.316	9.1341	45.5886	10.6496						41.3287				36.8641		2.70337
	4.09601	1659.29	89.8665	46.8993	85.0332						59.0645				7.24994		460.924
	117.924	9.50274	24.5761	32.9319	55.7467						53.9445				55.2961		475.629
	314.41	26.665	42.3937	22.4461	2.78529						116.572				175.391		171.172
	178.217	12.7386	29.737	10.4858	487.139						179.364				748.013		776.563
	662.898	24.4532	18.0634	12.8615	141.271						54.2721				3.48161		536.7
	4.17793	61.6859	141.312	24.0436	209.388						172.524				3.35873		3.31777
	4.05505	661.055	2338.9	13.0663	22.8967						228.066				188.744		3.48161
	21.2173	21.4221	29.1636	13.6397	19.497						70.6562				262.759		341.443
	80.6095	130.171	6.84034	41.2468	249.242						33.833				5.61153		4.95617
	264.275	711.272	21.9956	9.62562	262.022						25.8868				35.8401		2492.83
	577.415	10.6087	28.0577	8.68354	972.311						48.5377				72.0898		4.21889
	743.18	41.5335	3.97313	9.95331	65.7819						95.8876				30.0238		26.5012
	210.576	53.6987	15.442	91.0953	423.159						117.883				61.1125		3696.28
	144.63	626.239	34.857	91.6278	99.0825						48.8654				44.2779		3.52257
	619.563	57.3441	56.1153	52.1422	589.088						169.206				13.7216		1199.84
	352.134	57.7537	33.5054	117.146	37.6423						42.1889				35.0618		4.13697
	2214.14	130.868	81.8792	38.2977	208.159						25.7229				53.0843		4.50561
	337.634	281.314	1406.57	33.4234	16.8756						68.2395				40.5095		319.407
	5.07905	76.8002	67.5842	18.9236	599.656						51.2001				44.5236		1082.04
	4.79233	421.07	85.0332	22.6919	200.664						87.2041				100.311		3.03105
	51.8555	49.5617	54.1493	60.621	1603.47						297.329				54.9275		1538.09
	1001.93	1046	13.1482	18.7188	712.829						243.18				97.7718		635.332
	3.44065	1052.47	10.6906	24.4122	369.788						67.5432				8.56066		553.166
	3.11297	215.901	120.955	8.60162	387.728						19.6199				107.152		1190.59
	4.05505	1133.28	16.425	7.04514	690.301						63.4472				95.1094		2.99009
	246.293	488.818	252.15	190.956	1812.89						57.0984				143.237		3.48161
	207.217	146.105	430.9	46.1211	202.302						37.6833				143.975		4.91521
	891.988	404.235	25.3543	89.2111	385.435						102.155				71.1067		486.401
	3.97313	60.58	17.5309	140.575	430.122						443.311				233.268		3.56353
	92.6108	114.729	266.405	190.383	651.348						383.632				409.11		2292.86
	529.942	212.829	3.48161	695.421	177.726						78.9301				128.328		2.86721
	18.2682	449.209	4.34177	382.444	163.84						31.9079				923.773		325.838
	35.2667	142.173	83.149	119.726	95.1094						114.975				40.8372		6.92226
	1995.41	216.024	49.5208	137.913	468.747						155.034				41.8612		502.703
	942.123	88.5967	73.1547	252.191	1050.54						89.5797				69.8779		3.35873
	3.89121	447.899	45.22	174.695	220.12						44.8104				92.7746		4.30081
	3.60449	319.776	61.563	230.073	406.529						216.597				14.2132		769.599
	4.42369	124.314	9.3389	255.181	113.869						32.4814				11.264		7.4957
	7.57762	347.792	38.9121	130.581	6.2669						67.1336				65.9458		7.12706
	90.1122	941.304	222.413	136.315	272.794						483.288				114.934		654.87
	467.805	490.374	441.345	192.185	23.4292						154.01				92.5698		6.43074
	1127.92	723.355	39.6084	105.759	13.9264						195.462				131.892		440.403
	5.16097	1432.46	1877.69	207.954	33.0138						80.4456				164.209		1127.8
	5.98018	236.217	17.8586	119.808	109.404						168.469				14.1722		280.126
	11.7965	388.138	13.0663	435.447	17.408						94.1263				189.154		7.65954
	268.248	729.172	55.1733	219.587	23.3063						70.7791				192.103		62.1774
	419.513	215.286	20.7668	69.0178	11.7146						18.0224				1546.74		197.018
	2317.48	468.01	23.1425	49.6436	411.403						34.7342				4.54657		28.4263
	215.573	693.496	36.4955	27.1156	1184.28						234.742				4.21889		39.4446
	289.465	143.319	23.634	17.9815	309.617						60.9486				121.774		1298.6
	175.514	186.368	306.382	16.5888	43.9912						20.8487				6.10306		3.19489
	559.433	354.592	323.38	14.0493	11.6736						31.5802				6.4717		3.39969
	267.838	149.013	670.886	25.3543	153.191						18.1044				17.9405		1072.54
	324.24	195.748	15.1143	41.4926	361.637						58.2453				17.9405		3.31777
	233.268	41.6974	36.987	60.4981	183.01						310.723				49.1521		10.7725
	252.519	273.9	1766.65	59.556	337.306						47.6776				138.036		692.594
	1610.76	175.145	46.7764	21.4631	8.84738						59.6379				15.6468		5.36577
	4.66945	323.626	22.6509	21.3812	233.636						648.235				61.1534		511.96
	4.34177	358.196	8.88834	55.7057	93.3481						423.527				163.308		372.819
	5.77537	550.299	32.3994	92.6927	36.0859						16.1792				131.072		120.832
	14.418	215.573	86.3029	37.5604	22.0775						36.1678				162.407		1384.62
	165.11	157.737	18.473	54.3541	10.6906						31.6212				47.6776		475.67
	160.686	305.03	11.9194	21.6269	289.178						153.764				34.0378		1735.4
	483.206	283.28	50.4219	19.0464	12.0423						125.461				15.6877		2.78529
	10.1991	222.782	19.2512	72.2536	122.143						49.316				1466.95		14.1312
	110.51	917.302	11.5507	61.9317	471.041						69.3864				3.80929		211.682
	197.059	1175.19	65.3314	72.909	375.768						97.6899				241.542		1458.3
	1233.02	18.432	299.377	15.2781	519.538						110.715				3.80929		2.90817
	774.023	35.5943	27.73	112.272	28.3444						158.72				304.129		1110.02
	937.986	20.0295	28.3854	91.423	76.4725						46.6945				46.4488		3.64545
	9.70754	60.4981	8.97026	50.0532	179.282						98.7958				128		1177.07
	7.53666	139.592	23.0196	18.6368	109.732						27.4842				40.3867		3.27681
	76.3496	469.157	195.585	29.2455	12.4109						15.5239				35.7172		8.35586
	253.174	258.335	48.9883	23.4701	820.718						7.41378				71.3935		763.169
	83.7225	260.465	531.498	37.4375	41.1239						15.5648				165.397		5.07905
	869.993	185.549	3.52257	73.3186	126.362						35.8811				29.6961		1341.16
	7.78242	260.67	324.404	109.568	91.7097						8.97026				34.6522		3.56353
	59.2693	385.885	3.72737	48.9473	1076.19						42.2708				181.167		3.97313
	214.508	150.774	136.233	95.3142	388.711						89.7026				82.9442		586.18
	402.433	991.439	140.944	340.256	345.498						81.2239				65.7		628.533
	40.5505	277.873	2664.09	128.942	40.8782						23.3473				45.9982		3.35873
	865.733	141.067	33.0548	124.887	501.106						118.989				140.657		3.80929
	5.28385	16.466	87.8185	217.908	397.927						52.7976				1144.96		446.834
	6.96322	228.353	21.2173	226.878	286.434						44.3188				181.74		5.03809
	10.5267	143.074	23.1834	71.4754	135.005						31.0068				151.225		950.315
	390.063	150.283	9.91235	348.816	165.151						30.5562				134.759		6.22594
	8.80642	45.7524	56.1563	98.2223	110.92						8.06914				50.5038		348.857
	1234.13	52.7566	8.23298	79.8722	945.277						14.2132				126.894		1236.71
	4.05505	360.49	9.21602	59.8018	79.5445						13.7216				89.6207		7.82338
	3.93217	165.97	2295.4	87.245	8.43778						9.09314				71.3935		1758.54
	211.477	294.626	108.462	135.578	400.877						19.2512				245.679		652.126
	292.906	383.878	40.8782	183.665	451.913						68.8949				243.016		4.95617
	795.896	1845.87	23.1425	290.366	229.377						110.224				867.535		3544.36
	5.16097	7.12706	178.381	260.301	396.371						47.4728				243.59		3.89121
	4.66945	303.187	77.9471	413.697	312.771						25.2314				147.333		1138.4
	700.377	954.698	28.4673	81.9612	70.1237						75.8172				5.44769		7.24994
	5.85729	4.42369	6.8813	84.6236	385.23						54.1493				409.929
	7.86434	6.18498	22.2004	48.21	2215.2						20.8897				302.204
	23.5521	1245.06	24.9037	38.5844	250.225						58.491				1065.54
	624.027	10.7315	9.62562	31.4164	320.554						157.041				36.9051
	4.58753	331.408	2148.11	26.5421	214.058						57.467				37.0279
	4.66945	582.78	195.994	64.0616	302.449						33.5054				3.19489
	28.0577	191.857	21.1354	50.0123	15.0324						63.1605				3.23585
	1058.61	660.932	19.4151	26.3783	38.8302						47.268				163.021
	3.64545	764.766	42.066	14.8276	9.37986						43.7454				9.50274
	3.64545	10.8544	39.5265	15.8925	264.725						14.7866				183.706
	4.58753	890.637	13.353	87.4089	9.87139						8.5197				21.7908
	6.6765	10.7725	17.449	128.574	10.5677						22.2823				25.4362
	151.675	10.6496	14.0493	84.173	20.8077						23.9207				95.3551
	249.283	35.7582	51.1592	45.3019	1017.69						12.1652				76.4316
	335.217	1395.8	851.97	48.8244	450.971						43.3358				54.7637
	229.581	93.9215	10.3219	54.3541	28.2625						26.8698				60.6619
	397.518	195.462	22.7329	99.3692	346.072						42.6395				17.7357
	276.235	1302.65	9.37986	127.755	316.622						51.364				47.1451
	218.194	17.408	28.5492	144.221	4.01409						21.586				28.4673
	190.997	16.7117	15.442	81.2239	4.79233						31.7441				70.9019
	64.1026	524.535	664.332	71.7621	512.001						106.414				260.138
	496.15	701.688	451.339	144.057	13.9674						12.7386				83.3129
	50.1352	8.35586	333.62	82.2479	48.9883						52.6337				328.049
	937.782	28.9998	8.19202	79.2988	16.384						31.9898				463.423
	89.4159	412.919	1344.27	528.14	166.175						105.8				202.384
	973.908	3.89121	31.3345	118.129	807.979						40.9191				842.59
	4.79233	86.9173	36.3316	173.179	575.039						46.5307				3.39969
	4.62849	132.875	11.5917	126.935	559.228						5.93922				3.56353
	149.259	132.055	37.5195	460.433	30.6791						50.1352				181.453
	188.58	286.188	23.4292	45.5067	22.6919						125.256				61.7678
	1289.06	148.398	70.2875	14.0493	1083.56						87.7365				75.6124
	3.56353	226.878	6.0621	11.9604	192.062						199.517				2911.61
	3.35873	830.999	44.5236	25.5181	13.4349						82.2069				3.52257
	3.97313	707.34	310.027	46.4488	357.623						374.744				256.615
	206.808	17.0394	36.0039	36.8641	638.773						396.821				173.63
	1517.33	2501.47	38.2567	114.279	577.046						80.3228				42.2299
	3.93217	4.91521	18.3501	41.9431	37.5604						50.0942				93.6758
	3.52257	12.329	7.9053	42.3527	296.469						55.7467				138.158
	5.36577	614.483	847.506	16.9165	823.667						155.485				433.153
	8.56066	4.17793	4.21889	58.2862	105.267						93.8396				2408.45
	647.661	359.916	289.178	124.191	155.321						48.1281				10.3629
	29.4503	4.62849	176.62	58.8187	68.9768						324.814				324.199
	27.2794	4.05505	45.9982	20.9306	980.667						24.6989				61.604
	68.4853	253.379	51.4049	19.2103	817.605						114.361				107.52
	204.596	224.953	35.4715	20.4391	359.015						253.461				60.0475
	571.066	179.119	12.9024	86.6306	42.9671						54.5179				35.0209
	853.854	122.307	155.566	25.3543	268.575						35.963				88.0642
	88.7605	148.931	554.108	17.6948	196.772						10.3219				43.6225
	76.3906	899.812	314.533	107.725	806.75						151.839				77.6194
	394.077	68.2395	58.2862	17.0804	196.322						106.578				266.364
	1161.14	826.206	99.5331	46.3668	131.81						37.4375				93.9215
	1090.48	22.4052	21.8317	16.5888	79.8312						345.867				3.27681
	6.30786	24.4122	8.3149	15.401	16.7527						117.146				188.416
	8.15106	332.145	1134.64	86.7125	13.9674						208.405				1496.23
	403.908	148.235	4.87425	68.2805	272.958						134.882				3.76833
	12.0013	134.841	326.575	67.1336	1671.21						122.553				3.64545
	327.23	50.7905	3.23585	31.3345	11.4279						96.7068				306.259
	657.983	161.547	4.95617	90.1942	8.88834						28.9178				370.976
	786.926	222.864	169.083	76.0629	66.9288						57.8766				746.826
	1585.32	251.044	36.3316	56.1563	5.61153						51.9784				3.60449
	419.268	237.446	50.9953	121.733	303.391						39.3217				258.663
	375.072	519.784	1983.9	127.304	716.966						83.8863				33.9559
	386.172	1353.32	17.9815	82.8213	282.87						228.475				153.846
	207.791	22.8557	32.1946	61.9317	202.015						334.644				105.227
	140.575	1086.38	25.8458	93.1023	54.5179						62.7099				52.0603
	538.912	3.76833	6.10306	269.804	219.546						142.746				147.333
	135.619	3.64545	7.78242	133.202	507.455						119.89				73.2367
	194.438	5.20193	329.729	85.6885	845.621						58.6549				105.022
	239.903	12.7386	37.7652	65.3723	114.483						126.034				130.376
	336.815	499.058	301.63	72.7451	12.2061						131.81				508.069
	204.063	4.13697	254.362	65.9048	328.418						49.275				3.72737
	320.185	721.799	20.8897	68.4034	381.789						17.8996				3.48161
	386.827	3.97313	131.441	101.294	993.201						28.8359				340.419
	187.802	5.07905	1551.94	129.68	9.37986						21.9137				1072.7
	451.585	8.3149	4.25985	139.019	164.291						12.2471				3.80929
	619.194	580.487	26.7879	125.092	261.735						44.9742				3.60449
	259.728	3.97313	52.6747	78.4386	340.174						47.1451				303.473
	180.265	4.50561	128.942	151.921	492.218						24.2893				509.83
	537.847	8.27394	15.6468	117.965	3.11297						25.9277				99.7788
	77.1279	21.586	139.264	203.408	70.0008						13.7216				19.538
	683.01	493.61	12.0832	133.325	511.018						12.4109				34.898
	813.591	3.23585	23.7569	212.706	104.121						26.2145				34.2836
	218.317	3.23585	22.7738	140.985	288.441						39.035				70.3285
	177.931	4.58753	18.8826	378.594	283.894						25.0266				76.8412
	480.872	6.18498	3.39969	145.613	393.217						27.771				959.531
	519.456	409.191	251.659	74.5064	6.63554						55.8696				6.84034
	2992.63	5.24289	5.24289	38.6663	233.555						137.995				928.402
	3.35873	6.14402	35.5534	23.5521	190.26						251.413				357.746
	4.17793	1320.27	25.9687	37.2327	42.3118						123.003				9.37986
	5.69345	7.61858	31.6622	45.0971	12.0013						38.6663				109.896
	10.9363	651.921	62.9147	17.7767	588.965						11.9604				1352.87
	65.741	356.558	10.4448	89.9074	142.869						18.5959				3.48161
	129.311	584.009	848.366	25.3133	1292.17						30.6791				147.456
	871.426	8.5197	1498.07	27.4842	226.55						28.0986				428.443
	3.85025	7.74146	70.0418	14.336	174.285						50.6267				66.8469
	3.72737	1157.7	80.077	58.9006	40.3047						115.016				67.4613
	4.54657	5.73441	61.7269	53.0433	16.8346						43.7864				104.899
	11.5098	14.0903	11.5098	39.4855	11.3869						63.8568				14.7456
	77.7013	150.569	14.2541	56.0744	181.945						68.9768				325.346
	109.036	829.606	15.6877	73.1957	70.0008						46.4078				1462.48
	176.743	10.4448	11.9194	67.2975	13.9264						164.086				3.52257
	185.304	8.39682	92.5698	49.5617	16.8346						193.536				3.44065
	119.931	13.8445	30.8839	65.1266	574.22						252.15				317.932
	483.452	1324.77	57.2622	46.5716	421.971						48.4558				73.4824
	1906.9	72.5813	6.8813	116.531	3.35873						26.2554				4.91521
	4.25985	71.3935	7.12706	104.08	369.173						15.401				96.4201
	7.45474	121.283	24.7399	130.622	255.181						48.0052				386.909
	61.4811	242.361	718.727	231.998	84.7465						27.5252				522.979
	242.197	948.267	3.72737	283.116	5.40673						106.128				7.2909
	809.74	604.571	506.84	144.139	45.5476						108.913				1280
	3.76833	408.167	45.5476	534.325	80.5685						47.3499				3.68641
	3.48161	1356.03	55.0504	165.725	19.0055						196.158				384.206
	7.45474	4.17793	2160.24	119.767	7.53666						61.2763				13.1482
	77.5784	3.93217	9.29794	58.5729	27.8529						15.6058				157.778
	280.659	4.42369	11.7556	83.4357	11.1821						18.7597				557.016
	20.1114	778.119	77.4965	71.5163	155.771						109.445				4.05505
	844.024	5.65249	10.3629	98.7139	26.0097						207.873				4.05505
	3049.52	7.37282	11.4688	104.243	61.5221						60.0475				194.56
	137.749	487.63	55.5419	86.3439	267.388						65.1675				5.44769
	211.764	5.24289	302.04	46.4488	142.541						131.113				111.698
	755.96	13.6807	31.6212	49.234	845.744						260.506				287.581
	377.447	222.536	10.281	41.9431	5.85729						23.593				767.51
	1270.83	303.555	80.8552	40.9191	41.8612						21.1764				28.3854
	435.406	210.002	256.615	42.066	136.93						32.2766				3.93217
	474.4	773.736	158.106	32.1946	226.796						51.9784				4.30081
	150.569	453.715	142.173	52.4289	420.169						125.707				132.137
	146.555	46.203	2113.38	34.4065	263.66						44.6875				107.397
	490.292	154.174	717.252	29.4094	182.477						52.1832				5.61153
	513.066	5.98018	48.0872	15.5648	219.218						28.754				23.4701
	367.904	326.206	4.87425	9.91235	201.565						65.1266				76.7183
	831.777	751.577	7.41378	23.2244	463.791						35.7582				221.922
	408.004	168.551	25.9687	19.2512	95.7647						37.6423				38.8302
	121.979	53.2072	17.5719	13.8036	260.711						32.4814				67.6661
	208.405	87.3679	5.61153	33.3415	17.9815						7.94626				166.134
	134.39	8.02818	455.804	12.4928	179.651						82.5346				133.366
	1401.74	142.623	107.561	28.795	367.043						228.557				100.598
	373.433	82.0431	264.193	46.0801	827.599						171.295				65.0037
	187.433	85.1151	94.9046	32.809	27.0746						416.073				1668.84
	232.326	84.214	21.8317	28.6311	476.939						118.006				4.01409
	291.39	692.717	8.06914	5.98018	44.155						60.0475				4.09601
	141.517	722.864	42.8033	37.1099	8.23298						32.5633				272.958
	95.7238	534.038	1887.52	16.466	21.6679						162.898				5.24289
	634.595	120.832	55.9925	73.8101	16.3431						122.02				1157.37
	77.988	160.154	7.4957	62.0136	9.70754						21.7498				4.42369
	225.977	89.334	135.742	35.5534	100.639						45.3838				4.83329
	109.241	223.274	11.5507	90.8086	214.836						42.5985				363.316
	161.014	1793.81	18.1863	77.046	17.5719						81.2239				29.737
	293.971	1066.72	349.144	30.9249	416.441						98.1814				45.8344
	120.3	5.98018	42.4347	32.4814	490.333						32.891				220.161
	124.724	6.79938	269.313	23.1015	73.3595						73.3595				133.899
	119.071	15.36	2.86721	22.3233	53.371						43.0081				140.247
	534.325	682.764	3.48161	13.5578	11.0183						150.037				529.983
	369.092	3.11297	141.763	97.1574	368.6						43.9912				64.9627
	133.735	3.11297	33.3415	49.6436	423.773						25.6001				6.22594
	167.568	4.25985	87.8594	19.3332	395.142						41.3697				36.4955
	438.273	851.683	217.826	20.4391	12.6567						77.7832				140.125
	130.622	3.76833	1679.24	7.41378	502.417						37.3556				140.739
	115.917	3.97313	55.0094	26.1325	115.426						40.6734				767.961
	67.5842	916.073	39.8132	10.6906	92.8975						196.69				10.4858
	173.671	4.46465	8.35586	233.595	266.691						68.813				75.0799
	82.7394	4.05505	9.09314	44.2369	66.4373						120.914				34.6113
	157.041	7.4957	9.42082	33.3825	165.888						48.4148				132.793
	135.005	32.6862	33.5873	94.9455	454.739						30.3924				190.219
	155.771	582.576	7.24994	52.5928	4.09601						359.794				67.9119
	245.474	19.9066	60.8258	157.574	4.13697						46.7355				48.8654
	255.386	53.6987	43.7044	72.4175	403.785						106.783				1880.77
	269.681	587.245	9.83043	424.47	96.1743						470.877				227.738
	99.0825	5.40673	9.37986	155.853	16.5888						376.096				236.913
	348.325	14.377	12.5338	419.8	11.3869						137.462				6.02114
	250.594	40.4686	723.028	101.376	223.192						84.3369				1155.94
	65.2494	816.949	29.6142	100.885	2.45761						704.678				3.89121
	143.606	3.48161	69.3864	189.85	10.1991						94.9865				4.17793
	365.323	3.72737	9.66658	447.407	908.29						47.7185				610.469
	275.784	164.496	21.0945	413.574	10.1991						130.458				1204.39
	228.394	51.1182	9.01122	261.203	375.645						82.9033				3.93217
	327.025	812.362	9.91235	149.791	310.437						105.882				4.17793
	125.502	636.192	332.105	433.89	58.6958						207.053				1564.55
	151.88	849.349	1079.13	100.393	197.592						71.1887				3.44065
	224.543	43.172	1145.37	85.4837	149.545						75.5304				254.28
	111.166	115.303	417.752	110.797	6.8813						63.7749				4.62849
	570.206	410.502	1137.34	76.0629	52.0193						68.5263				401.368
	154.911	48.292	293.315	34.5703	119.235						40.5505				23.8388
	201.114	571.353	5.32481	22.3642	388.302						132.752				6.10306
	410.379	98.0585	17.3671	18.9236	174.244						154.502				704.514
	276.358	151.102	20.8487	81.8383	47.5137						214.672				3.35873
	200.541	63.693	10.281	74.4245	2.94913						146.719				175.883
	173.876	434.669	8.9293	48.6606	11.1002						128.533				131.359
	1135.66	521.176	21.1764	40.5095	484.353						56.6888				7.53666
	216.106	55.8286	9.50274	28.5082	386.377						73.4005				125.01
	272.467	48.9883	10.4039	9.46178	703.285						40.8782				265.79
	57.3851	27.8529	363.726	42.8443	22.1185						44.6875				1038.79
	109.978	639.551	213.034	33.1367	226.305						27.2794				3.97313
	158.925	3.60449	87.0812	36.7822	93.471						394.651				4.42369
	117.76	3.80929	29.0817	46.203	692.226						134.39				25.5591
	116.613	7.45474	246.785	84.7055	4.79233						58.7368				6.75842
	960.187	231.629	215.245	130.417	238.224						159.54				83.1081
	442.369	6.14402	39.1579	188.99	584.828						49.4798				1561.15
	161.26	5.98018	24.658	120.054	48.0872						145.163				91.7506
	319.325	14.2951	2400.3	115.794	8.9293						82.0841				74.5474
	150.733	159.048	82.125	111.248	57.5899						66.1096				273.368
	308.716	384.165	42.2299	597.239	29.4503						170.927				1178.26
	338.126	488.736	865.61	450.725	219.096						95.437				6.8813
	182.436	298.517	25.3953	88.8425	193.25						28.6311				5.40673
	217.334	1091.96	18.9236	100.844	531.294						29.4094				371.058
	923.405	5.03809	17.2852	67.0927	26.8698						33.0958				5.61153
	20.9716	6.38978	29.1636	311.092	19.0055						372.532				31.3345
	50.7905	1795.81	32.6452	354.1	123.781						114.852				197.469
	123.167	6.0621	41.3287	166.953	152.085						68.5672				232.981
	145.408	17.9405	296.183	285.41	19.2103						86.262				184.443
	91.7097	138.077	4.13697	74.5474	58.4501						75.1618				61.8907
	554.067	386.827	626.321	73.4415	18.473						57.0165				74.7932
	489.883	6.71746	24.1665	36.1678	234.538						7.45474				439.215
	164.127	25.5181	1241.58	110.756	209.798						62.8738				5.24289
	99.3692	638.527	353.281	39.7313	257.967						498.075				433.235
	352.175	277.382	60.0066	31.6212	524.781						106.578				5.61153
	506.717	121.897	72.4175	27.2794	58.6139						81.7154				2190.67
	1186.2	237.2	88.5148	30.3105	169.698						103.506				3.56353
	406.16	114.115	17.3671	21.2583	19.3332						116.9				3.44065
	594.413	2412.51	102.277	18.7597	15.1552						54.5998				324.035
	6.4717	195.994	21.8317	26.2145	115.467						53.5758				47.0222
	5.52961	4.05505	40.2638	46.162	94.9865						20.7258				201.851
	7.4957	3.97313	11.7965	95.519	289.383						14.9504				210.33
	10.24	9.62562	92.8975	61.4811	101.704						39.4446				76.1858
	136.356	72.909	354.633	137.134	765.749						20.562				63.9387
	119.685	277.095	31.9079	121.447	25.3953						19.7428				133.407
[truncated: 1,617 more rows]

## Sheet: Fig 2B
Figure 2B - Representative Unit (unit2) ISIs
ISI (ms)
1025.35
48.7835
193.782
1071.56
1832.8
203.203
798.845
502.621
93.2252
1450.19
459.859
200.336
131.277
1824.53
1285.66
3.56353
3.93217
190.956
877.816
654.583
55.419
116.818
206.48
888.384
3.60449
3.48161
13.8445
2442.12
6.96322
33.5054
37.6833
272.794
3237.4
854.018
6.63554
9.37986
18.473
85.7295
1228.19
4.17793
4.46465
37.4785
1176.42
186.409
132.506
1418.08
13.7216
113.132
814.287
38.6663
46.4078
2557.55
857.049
296.183
1213.73
207.422
126.485
126.69
780.741
589.334
2271.81
3.72737
3.35873
427.173
2836.04
7.45474
471.287
5.16097
5.48865
40.3457
857.336
126.116
2179
7.41378
1004.01
77.6604
3200.83
121.733
576.309
218.932
97.6079
247.071
153.928
60.1294
50.1352
86.5077
17.2852
27.2794
60.6619
76.2268
61.0306
53.7806
186.123
104.489
288.646
75.4076
129.557
850.291
239.248
77.7832
241.91
77.005
98.6319
190.505
132.055
181.371
146.719
188.949
288.236
173.343
114.033
106.087
155.566
34.4474
88.3919
82.4937
100.475
123.085
118.334
75.0389
311.87
73.8511
98.0995
176.292
125.543
308.389
107.397
133.202
71.2706
70.6971
19.3741
30.9658
32.3994
69.5503
75.6533
33.4644
67.4613
121.201
47.4318
100.229
172.975
173.548
96.7478
349.103
213.73
161.833
388.589
134.554
65.741
160.973
173.384
99.574
142.295
118.293
115.016
46.3259
509.257
221.676
132.875
211.395
70.7791
239.084
152.413
214.959
138.937
81.5516
31.826
844.106
91.8735
183.583
208.282
134.103
259.851
143.483
159.171
253.502
134.595
1228.23
277.423
300.647
102.155
179.897
57.0165
130.908
117.064
208.241
161.547
166.871
95.5599
83.9273
280.085
117.76
39.3627
181.986
305.03
310.6
207.504
90.4809
138.077
104.653
132.301
61.3173
286.147
406.201
84.5826
96.8706
203.736
163.103
305.603
399.361
340.583
514.582
737.651
536.987
107.315
126.976
44.155
30.3105
104.325
93.5529
134.882
54.1902
372.901
892.48
230.892
80.1999
451.913
188.826
385.885
69.3045
117.146
95.8876
718.358
219.382
142.664
251.946
169.984
90.8495
68.0757
37.6014
62.9557
30.802
44.9742
85.2789
56.6478
255.059
59.0645
313.836
126.526
78.3157
142.828
49.8484
96.2972
96.9116
138.978
408.045
121.652
108.749
88.4329
87.5727
137.626
330.876
104.899
138.732
157.819
129.925
510.199
77.5375
163.922
63.3243
46.9812
89.1701
160.768
73.7282
1137.5
185.017
466.003
106.906
145.408
161.71
116.245
233.964
371.099
168.838
137.749
118.211
583.354
132.793
31.5393
851.724
368.068
162.161
97.7718
346.236
76.1039
47.3499
219.546
506.472
1282.34
218.235
123.208
203.94
950.971
173.671
209.961
3055.3
173.548
418.448
294.462
158.679
107.643
272.467
58.4501
150.61
159.171
46.5307
148.03
90.0303
270.582
247.686
144.139
104.817
72.4584
278.856
418.039
347.137
330.548
219.71
199.271
51.9374
445.646
188.416
223.192
121.692
247.194
523.347
100.27
178.504
275.17
184.771
441.058
257.352
67.8299
185.549
342.713
168.633
393.135
311.215
145.777
137.544
1758.5
132.506
165.52
523.265
159.007
241.787
158.434
237.569
239.535
308.512
252.847
93.43
139.551
80.7324
129.762
181.822
178.463
191.775
183.706
120.914
418.53
272.589
297.78
341.853
860.531
644.507
109.773
307.447
462.276
117.433
157.942
120.3
83.3129
149.218
489.105
135.496
249.939
142.623
251.741
222.413
1119.4
519.661
1677.64
924.306
30.7201
91.1362
151.921
139.141
163.513
355.452
111.248
78.9301
52.4289
176.661
459.409
511.182
462.522
167.24
4.71041
1764.19
6.22594
7.7005
452.486
230.237
586.467
125.256
228.639
69.9189
82.9033
263.947
140.452
347.178
102.318
259.81
163.431
278.447
72.7042
233.186
164.578
125.215
139.264
109.2
32.85
154.788
140.043
289.055
710.535
219.71
119.071
61.9726
352.503
101.54
128
147.415
335.013
96.2153
117.965
69.3045
199.23
392.111
361.842
75.8172
219.423
218.358
103.506
140.821
198.083
664.701
184.976
349.308
147.006
272.958
1193.37
2046.28
1422.71
610.674
217.785
67.6251
1735.97
972.966
2257.15
132.629
217.334
114.156
213.32
453.551
362.456
99.1644
883.55
1458.92
3.68641
3.60449
5.69345
162.161
1680.14
4.46465
491.48
5.73441
2699.07
5.77537
477.431
4.21889
4.34177
17.3671
230.319
313.918
1308.68
792.619
321.209
22.8148
1420.82
3.89121
3.56353
674.244
1045.55
1847.34
291.554
545.261
5791.96
533.014
1993.86
158.229
194.356
92.0783
122.839
762.595
456.828
188.294
1381.17
539.936
230.155
157.574
49.234
75.8991
163.267
255.591
59.2283
59.9656
266.978
266.568
52.9205
51.364
598.591
80.9781
809.536
185.017
1446.75
165.602
98.0175
195.257
141.517
173.753
789.998
192.021
464.774
724.748
202.261
207.463
663.881
717.375
5.73441
5.69345
43.7454
22.2413
96.8706
134.882
211.682
322.028
644.343
8.02818
63.3653
63.9387
146.883
157.492
1599
3.68641
575.121
3.60449
3.48161
4.38273
6.14402
8.02818
19.6199
346.891
2190.46
41.3697
71.4754
68.6901
438.396
414.189
309.454
3670.03
708.815
16.6298
1280.74
10.24
25.641
3139.59
109.404
178.955
1087.9
3.85025
3.52257
4.83329
246.088
1472.93
3.48161
3.31777
4.09601
5.20193
106.496
86.7125
876.464
3.39969
3.60449
2128.61
3.31777
3.27681
4.17793
124.109
490.047
587.655
5.03809
5.69345
96.5839
851.151
4.58753
4.58753
891.333
5.48865
37.7243
21.1354
445.523
874.048
850.578
691.448
24.7809
384.574
262.554
244.122
2441.22
1025.56
6.2669
404.276
960.76
1619.69
780.577
1200.87
6.2669
1462.64
3.80929
3.56353
1076.02
3.68641
3.72737
1535.23
3.39969
3.23585
643.442
4.01409
3.64545
4.30081
6.84034
8.43778
649.627
5.44769
6.10306
882.076
3.27681
3.03105
3.93217
5.03809
887.851
3.68641
3.80929
4.95617
33.3415
904.112
414.189
1417.14
246.047
962.972
4.30081
4.09601
11.3869
82.3708
959.613
54.395
522.815
367.371
418.448
1290.82
2104.61
4.13697
3.68641
4.95617
53.9035
625.297
5.98018
1259.15
8.3149
265.626
627.263
1617.19
1486.89
2103.63
898.992
729.459
4.42369
53.9035
80.5685
2350.7
6.38978
6.75842
596.379
6.8813
10.8544
3118.99
2270.66
4.54657
4.95617
123.044
2044.24
642.705
2089.54
362.988
95.437
2214.96
3018.68
956.746
303.064
1049.28
755.837
5.40673
257.885
199.271
1143.28
1501.27
1282.22
460.76
2823.99
1173.34
238.347
81.7154
130.868
2463.26
88.3509
159.785
702.834
71.5983
171.951
252.109
108.462
287.007
133.038
97.1574
419.718
110.469
354.182
78.07
908.413
282.092
311.133
1162
154.051
288.441
246.703
616.327
101.049
98.2223
18.9645
548.333
275.989
620.505
322.602
242.893
165.847
155.075
249.037
683.419
143.934
82.3708
130.949
140.043
2211.72
504.055
96.3791
123.208
1608.09
1100.76
29.5322
152.331
144.057
171.705
965.839
115.344
379.372
430.368
181.904
97.7308
641.108
207.586
1379.25
207.34
270.869
127.673
112.231
282.133
303.228
137.544
3428.4
2414.23
189.522
1237.24
184.239
161.629
398.951
134.964
348.243
179.119
198.247
140.903
153.314
122.594
131.892
256.205
273.532
987.057
1473.7
3913.74
881.666
10.8544
208.036
509.421
583.641
5.93922
29.8599
38.6254
56.2792
2647.58
4.13697
3.97313
6.14402
188.253
2486.16
231.793
132.506
170.722
151.921
1366.84
769.067
1103.3
41.4926
1126.53
4.75137
25.2724
71.2706
584.337
3.97313
4.38273
26.0097
357.336
328.336
1706.64
138.404
1592.69
5.93922
7.20898
36.2087
107.684
213.279
777.75
6.8813
265.299
563.652
5.57057
38.7073
106.251
1469.36
133.407
1567.95
5.32481
5.44769
164.783
1964.49
3.56353
3.48161
1336.94
12.5748
45.4248
396.903
1087.25
3.68641
3.80929
1544.65
3.35873
3.03105
3.93217
5.03809
690.792
4.95617
5.36577
584.337
3.60449
3.64545
4.50561
112.435
62.3003
389.039
512.943
859.261
45.7934
1729.25
4.62849
4.17793
136.52
195.707
32.85
197.346
641.681
655.157
142.377
401.327
53.6168
176.538
687.761
10.4039
33.915
46.4488
49.0702
2695.54
88.5148
1096.99
40.5505
91.6687
871.59
1422.26
1469.57
7.53666
4.91521
25.5181
99.7788
713.484
2937.13
150.528
297.247
1979.03
467.478
698.575
1258.95
3.44065
3.39969
3056.2
3.48161
566.888
3.48161
3.19489
4.25985
284.673
767.224
3.80929
3.76833
654.583
3.85025
3.97313
4.75137
6.79938
95.478
104.039
1432.58
4.99713
450.643
6.8813
1000.04
10.0762
36.0449
140.411
196.199
785.656
57.8357
104.94
835.381
1104.65
146.228
491.439
1516.96
632.916
4.54657
4.13697
5.81633
38.7483
98.6729
896.494
1554.97
7.24994
1782.17
849.103
57.2622
89.4569
3424.14
339.354
559.146
130.745
2440.61
34.6522
55.7057
133.325
465.553
894.937
4.62849
4.17793
5.77537
27.9348
62.8738
1149.3
286.762
380.437
191.161
129.557
61.8498
168.346
171.254
106.169
453.428
79.5445
153.969
138.445
160.85
310.437
167.404
352.707
597.731
787.868
289.629
54.2721
63.652
126.321
77.046
203.981
966.372
171.5
584.132
1479.56
3.03105
2.82625
4.21889
261.039
4.21889
4.58753
13.5168
1568.2
3.85025
3.80929
562.587
4.75137
195.585
5.24289
570.615
4.30081
4.58753
158.761
403.334
4.91521
4.75137
327.271
4.87425
38.0929
509.953
320.759
1574.67
24.0026
155.239
1300.52
3.76833
3.56353
4.62849
7.94626
199.721
193.864
650.078
7.33186
1092.57
27.2794
67.5432
1115.75
120.955
410.134
908.372
25.2314
27.0337
620.709
1414.64
10.6087
875.522
6.59458
1020.03
3.89121
965.143
3.31777
3.15393
27.4433
253.543
301.507
1811.5
3.56353
3.64545
44.196
2528.59
425.002
440.649
107.807
1340.79
437.904
690.751
132.096
1652.74
510.895
158.352
1436.63
994.757
640.903
2267.31
294.257
163.226
509.994
5.07905
5.07905
16.8756
24.0436
120.505
1102.44
1339.97
232.735
3945.65
3.52257
3.39969
4.42369
6.59458
662.53
5.07905
24.9447
57.7537
709.265
1142.34
3.35873
3.19489
4.01409
500.614
3.68641
5.77537
655.321
5.16097
4.71041
9.50274
29.4913
409.601
5.07905
30.802
1422.05
4.58753
4.21889
168.018
1001.23
5.07905
22.1594
416.482
5.77537
45.5476
17.5719
177.48
659.212
611.821
183.993
592.406
291.595
407.512
171.5
166.134
170.066
301.507
1293.07
165.028
885.394
1506.47
36.987
702.548
806.464
80.5685
706.93
3599.82
535.635
9.99427
28.1806
1264.15
572.786
354.182
1429.67
70.6971
185.222
100.803
88.4329
157.533
134.226
1193.66
289.055
178.135
221.635
595.109
427.132
1863.89
566.232
174.367
162.038
53.2891
216.802
149.914
105.186
78.6844
126.239
593.717
949.537
1758.79
1007.95
25.682
1013.84
4.71041
331.49
544.237
169.739
239.289
2001.02
145.408
200.664
436.88
834.316
193.741
140.411
594.823
224.707
119.685
116.286
108.38
71.0248
164.209
1575.53
279.43
177.931
285
329.319
95.7238
161.383
132.957
114.688
588.351
402.679
1133.57
114.688
195.052
74.0559
294.585
89.2521
172.401
170.517
208.241
70.1647
95.3551
110.592
36.3726
410.461
260.301
305.767
181.863
249.078
189.359
433.808
742.238
602.769
197.264
615.712
243.139
176.866
38.011
306.586
210.453
80.3228
106.332
98.4681
76.6364
77.4556
328.828
119.808
114.483
343.86
114.811
62.4642
356.763
201.196
175.514
82.0841
186.737
104.489
113.419
66.8059
68.1576
127.836
60.2933
414.352
332.023
294.38
174.367
91.4639
146.269
120.341
104.08
25.0676
291.759
112.927
117.842
69.3045
154.42
208.077
300.279
690.833
192.021
101.008
368.108
283.772
471.901
160.072
106.537
220.775
70.3285
105.636
159.622
89.0063
82.3708
161.178
176.169
172.032
368.928
123.536
191.284
273.368
54.0673
134.8
342.467
166.79
230.401
166.052
121.57
495.986
100.721
116.736
84.5007
24.4532
178.832
138.158
49.8484
64.717
63.7749
165.274
83.3129
92.0783
214.672
116.45
685.877
157
202.261
62.5461
63.652
1050.71
48.7835
132.424
78.029
36.7822
129.557
98.3862
34.7751
45.0971
136.397
215.368
67.9528
35.3895
329.196
170.845
342.426
146.105
175.678
298.64
181.699
314.246
278.365
61.5221
249.775
139.551
132.588
30.802
148.562
819.407
8.39682
73.6053
989.105
120.546
245.843
171.049
415.704
50.5448
63.8568
107.438
335.463
173.138
143.688
262.472
161.137
86.0981
202.425
104.612
201.647
111.411
157.614
63.3653
178.914
135.947
51.4459
87.3269
271.484
128.492
208.364
186.778
184.525
85.5657
101.909
48.6606
43.09
77.2508
16.5479
27.6481
14.377
36.4545
292.127
59.3102
229.459
256.205
60.9486
121.078
145.654
54.0264
58.8187
175.678
66.1096
119.726
145.326
148.972
45.4657
91.9964
61.8088
92.4879
88.8425
320.595
85.0332
68.772
71.1477
109.732
5.07905
113.992
208.897
137.093
56.1153
98.3862
340.624
120.095
87.5727
86.7535
65.0446
54.8456
140.329
93.1023
238.634
31.4983
44.4417
136.848
138.117
89.293
84.2549
88.269
43.8683
73.0728
216.884
223.642
107.889
83.6405
61.8498
31.0478
141.681
54.7227
122.716
57.7947
80.6095
57.2213
285.533
128.86
136.561
175.023
48.0052
86.0572
47.9643
46.9403
85.0741
97.2802
94.6588
98.4271
34.4474
176.989
79.9951
43.09
339.805
130.294
120.013
65.9048
1364.75
84.9513
238.265
190.833
525.231
506.922
88.8425
546.817
362.292
309.822
250.307
179.159
207.75
237.528
113.337
241.828
288.277
212.911
299.05
90.317
395.347
43.0081
179.364
51.5278
81.4287
148.398
64.635
92.5698
162.325
59.3512
356.599
322.643
113.623
833.006
210.043
163.39
80.6914
44.5236
225.526
113.992
125.911
82.9852
283.116
237.651
97.9766
68.2805
104.571
71.1477
97.485
44.9742
303.883
251.167
200.623
529.123
115.999
132.997
348.734
148.357
87.4908
313.14
117.924
90.5628
231.22
341.362
113.828
868.027
158.475
67.9938
115.835
75.3666
177.849
353.117
57.5899
239.78
221.881
120.668
482.633
495.249
71.5163
150.16
25.1495
118.825
38.8302
188.089
115.712
119.644
181.494
74.1787
176.087
139.428
3513.15
423.978
437.741
309.454
181.658
236.094
503.359
274.187
151.389
193.004
204.145
95.437
66.0277
69.8779
90.4399
85.6885
75.2028
2117.43
841.771
7.7005
1264.97
175.023
685.959
556.484
509.708
96.7478
937.741
6.8813
29.8599
239.002
158.925
186.082
445.687
627.058
191.611
122.266
175.678
478.332
9.3389
68.4034
61.604
244.778
157.287
167.117
1755.51
140.329
484.722
3.97313
3.76833
5.89826
941.837
187.843
376.178
1087.98
2694.23
3.23585
3.03105
3.89121
4.66945
110.715
722.168
446.752
41.2059
146.883
271.156
228.312
1587.61
3.52257
3.52257
4.62849
92.9794

## Sheet: Fig 2C 2D
Figure 2C - Burst Rate			Figure 2D - Spikes per Burst Distribution
	Firing Rate (bursts/s)			Fraction Bursts
Unit2	0.138333			2	3	4	5	6
Unit3	0.188333		Unit2	0.289157	0.361446	0.240964	0.108434	0
Unit6	0.225		Unit3	0.017699	0.238938	0.389381	0.318584	0.035398
Unit8	0.445		Unit6	0.185185	0.377778	0.296296	0.133333	0.007407
Unit12	0.0433333		Unit8	0.554307	0.382022	0.059925	0.003745	0
Unit13	0.265		Unit13	0.660377	0.320755	0.018868	0	0
Unit16	0.0433333		Unit20	0.130841	0.224299	0.373832	0.214953	0.056075
Unit18	0		Unit27	0.104938	0.376543	0.302469	0.166667	0.049383
Unit20	0.18		Unit33	0.514512	0.46438	0.015831	0.005277	0
Unit24	0.0166667		Unit35	0.369458	0.53202	0.093596	0.004926	0
Unit25	0.0116667		Unit36	0.637168	0.331858	0.030973	0	0
Unit27	0.271667		Mean	0.3464	0.361	0.1822	0.09559	0.01483
Unit29	0.0933333		SD	0.235	0.09247	0.153	0.1124	0.02283
Unit30	0
Unit32	0.00166667
Unit33	0.631667
Unit35	0.338333
Unit36	0.376667

## Sheet: Fig 2E
Figure 2E - Interburst Interval (IBI) Distribution
	Fraction IBI
IBI (ms)	Unit2	Unit3	Unit6	Unit8	Unit13	Unit20	Unit27	Unit33	Unit35	Unit36	Mean	SD
100	0	0	0	0	0.0189873	0	0	0.0185185	0	0	0.00375059	0.0079077
200	0	0	0.00746269	0	0.0443038	0	0.0246914	0.021164	0	0	0.00976219	0.015359
300	0.0243902	0.00892857	0	0.0225564	0.0189873	0	0.0740741	0.0661376	0	0.0311111	0.0246185	0.0264832
400	0.0121951	0	0.0522388	0.0488722	0.00632911	0.00934579	0.0246914	0.0634921	0.0049505	0.0488889	0.0271004	0.0238158
500	0.0487805	0	0.0447761	0.0488722	0.0189873	0.0373832	0.0308642	0.0396825	0.00990099	0.0444444	0.0323691	0.0171722
600	0.0853659	0.0267857	0.0597015	0.0338346	0.0506329	0.046729	0.0185185	0.0449735	0.0148515	0.0355556	0.0416949	0.0208882
700	0.0853659	0.0267857	0.0223881	0.0413534	0.0189873	0.00934579	0.0432099	0.0343915	0.00990099	0.0355556	0.0327284	0.0220217
800	0.0121951	0.0178571	0.0373134	0.0488722	0.056962	0.00934579	0.0432099	0.0449735	0.0693069	0.0488889	0.0388925	0.0198254
900	0.0121951	0.0178571	0.0447761	0.0488722	0.0189873	0.00934579	0.0308642	0.0291005	0.0346535	0.0355556	0.0282207	0.0133718
1000	0.0487805	0.0357143	0.0522388	0.0526316	0.00632911	0.0373832	0.0123457	0.026455	0.029703	0.0133333	0.0314914	0.0169535
1100	0.0365854	0.0892857	0.0597015	0.037594	0.0316456	0.00934579	0.0308642	0.0291005	0.029703	0.04	0.0393826	0.02147
1200	0.0121951	0.0267857	0.0447761	0.037594	0.0189873	0.0186916	0.037037	0.042328	0.0148515	0.0355556	0.0288802	0.0120269
1300	0.0121951	0.0446429	0.0373134	0.0300752	0.0443038	0.0280374	0.0493827	0.031746	0.019802	0.0444444	0.0341943	0.0120592
1400	0	0.0267857	0.00746269	0.0601504	0.0379747	0.0186916	0.0308642	0.0343915	0.0247525	0.04	0.0281073	0.0170962
1500	0.0121951	0.0178571	0.0373134	0.037594	0.0189873	0.0280374	0.0123457	0.0555556	0.0346535	0.04	0.0294539	0.0140799
1600	0.0365854	0.0357143	0.00746269	0.037594	0.0253165	0.0280374	0.0555556	0.037037	0.0445545	0.00444444	0.0312302	0.0157049
1700	0.0121951	0.0357143	0.0298507	0.0225564	0.0379747	0	0.0123457	0.026455	0.0445545	0.0177778	0.0239424	0.0136919
1800	0.0121951	0.0535714	0.00746269	0.0413534	0.0443038	0	0.0185185	0.026455	0.0445545	0.0177778	0.0266192	0.0182737
1900	0.0121951	0.00892857	0.00746269	0.0263158	0.0253165	0.0373832	0.0123457	0.042328	0.0643564	0.0355556	0.0272188	0.0181246
2000	0.0243902	0.0178571	0.0149254	0.018797	0.00632911	0.0186916	0.0246914	0.031746	0.0346535	0.0133333	0.0205415	0.00853675
2100	0	0.00892857	0.00746269	0.0225564	0.0189873	0.00934579	0.0123457	0.021164	0.019802	0.0177778	0.013837	0.00734795
2200	0.0243902	0.0357143	0.00746269	0.018797	0	0.00934579	0.0246914	0.026455	0.00990099	0.0133333	0.0170091	0.0108475
2300	0	0.0178571	0	0.018797	0.0316456	0.00934579	0.0185185	0.021164	0.019802	0.0222222	0.0159352	0.00999152
2400	0	0	0	0.0150376	0.0189873	0.0186916	0.00617284	0.0132275	0.0247525	0.00888889	0.0105758	0.00895862
2500	0.0121951	0.0267857	0.0149254	0.0037594	0	0.0280374	0.00617284	0.010582	0.019802	0.0222222	0.0144482	0.00964775
2600	0	0.00892857	0	0.0112782	0.0379747	0	0.0123457	0.0132275	0.0148515	0.0266667	0.0125273	0.0121962
2700	0	0.00892857	0.0298507	0.0112782	0.0126582	0.0186916	0.0123457	0.00529101	0.019802	0.0133333	0.0132179	0.00823785
2800	0.0243902	0.00892857	0.0223881	0.0112782	0.0189873	0.0186916	0.00617284	0.010582	0.029703	0.00888889	0.0160011	0.00791581
2900	0.0121951	0	0	0.018797	0.00632911	0.00934579	0.0246914	0.00793651	0.019802	0.00888889	0.0107986	0.0082134
3000	0.0121951	0	0.0223881	0.0225564	0.0189873	0.0280374	0.00617284	0.010582	0.00990099	0	0.013082	0.00967283
3100	0.0121951	0.0178571	0	0	0	0	0.0123457	0.0132275	0.0049505	0.0133333	0.00739093	0.00707899
3200	0	0.00892857	0	0.0075188	0.00632911	0	0.0308642	0	0.0049505	0.00888889	0.00674801	0.009292
3300	0	0.00892857	0	0	0.00632911	0.0373832	0.0123457	0.00793651	0.00990099	0.00444444	0.00872685	0.0109994
3400	0.0121951	0	0.0223881	0.0037594	0.00632911	0.0373832	0.00617284	0.00529101	0.00990099	0.0266667	0.0130086	0.0119473
3500	0	0.00892857	0.00746269	0	0.00632911	0.00934579	0.0123457	0.015873	0.00990099	0	0.00701859	0.00550359
3600	0.0243902	0	0	0.0037594	0	0.00934579	0.0123457	0.00529101	0.00990099	0.00888889	0.0073922	0.00750827
3700	0	0.00892857	0	0.0075188	0	0.0186916	0	0.0026455	0.00990099	0.00444444	0.00521299	0.0061342
3800	0.0243902	0	0.0149254	0.0150376	0.0189873	0.0186916	0	0	0.0148515	0.00888889	0.0115773	0.00890023
3900	0	0	0.00746269	0.0075188	0.0126582	0.0186916	0	0.00793651	0.00990099	0.0133333	0.00775021	0.00632427
4000	0.0243902	0	0.0149254	0.0075188	0.0126582	0.00934579	0.0123457	0.00529101	0.0148515	0.00444444	0.0105771	0.00686162
4100	0	0.0178571	0	0.0112782	0	0.0186916	0.00617284	0.0026455	0.0148515	0.00444444	0.00759412	0.00748455
4200	0.0121951	0	0.00746269	0	0.0126582	0.00934579	0	0.0026455	0.0148515	0	0.00591588	0.00605141
4300	0	0.00892857	0	0	0.00632911	0.00934579	0.00617284	0.00529101	0.00990099	0.00444444	0.00504128	0.00389954
4400	0	0.00892857	0.00746269	0.0037594	0	0.00934579	0	0	0	0	0.00294965	0.0040809
4500	0.0121951	0	0	0	0	0	0.0123457	0	0.00990099	0	0.00344418	0.00558314
4600	0	0	0	0.0075188	0	0.00934579	0.00617284	0.00529101	0.0247525	0	0.00530809	0.00775243
4700	0	0.0178571	0.00746269	0.0037594	0	0	0	0	0.0049505	0.0133333	0.00473631	0.0063828
4800	0	0.00892857	0	0.0075188	0.00632911	0	0.0123457	0.0026455	0.00990099	0	0.00476687	0.00479031
4900	0	0	0	0.0075188	0.00632911	0.00934579	0	0.0026455	0.00990099	0.00888889	0.00446291	0.00433076
5000	0	0	0	0.0037594	0.00632911	0	0.00617284	0	0.0049505	0.0177778	0.00389896	0.00558602
5100	0	0.00892857	0.00746269	0	0.00632911	0	0.00617284	0.0026455	0	0.00888889	0.00404276	0.00388937
5200	0	0	0	0.0075188	0.00632911	0	0	0	0	0.00444444	0.00182924	0.00303465
5300	0	0	0	0.0037594	0	0	0	0	0	0.00444444	0.000820384	0.00173704
5400	0.0121951	0.0178571	0.00746269	0	0	0	0	0.0026455	0	0.00888889	0.00490493	0.00640067
5500	0	0	0	0	0	0	0	0	0	0.00444444	0.000444444	0.00140546
5600	0	0.00892857	0.0149254	0	0	0	0	0	0	0.00444444	0.00282984	0.00518716
5700	0	0.00892857	0.00746269	0	0.00632911	0.00934579	0	0.0026455	0.00990099	0.00888889	0.00535015	0.00422442
5800	0	0	0.00746269	0	0.00632911	0.00934579	0	0.0026455	0	0	0.00257831	0.00370608
5900	0.0121951	0	0	0	0	0	0	0	0	0	0.00121951	0.00385644
6000	0	0	0.0149254	0	0.0126582	0.0186916	0.00617284	0	0.0049505	0	0.00573985	0.00719201
6100	0	0.00892857	0.00746269	0	0	0	0	0	0	0	0.00163913	0.00347281
6200	0	0.00892857	0.00746269	0	0	0	0	0	0.00990099	0	0.00262922	0.00427281
6300	0	0	0	0	0.0126582	0	0	0	0.0049505	0	0.00176087	0.00413295
6400	0	0	0.00746269	0.0075188	0	0	0.00617284	0.00529101	0.0049505	0	0.00313958	0.0034036
6500	0	0	0	0.0037594	0	0	0.0123457	0	0	0.00888889	0.0024994	0.00451038
6600	0	0	0	0	0.00632911	0	0	0.0026455	0.00990099	0	0.00188756	0.00348739
6700	0	0	0	0	0.0126582	0	0	0.0026455	0	0	0.00153037	0.00399735
6800	0.0121951	0	0.00746269	0	0	0	0	0	0.0049505	0	0.00246083	0.00432516
6900	0	0	0	0.0037594	0	0	0	0	0.00990099	0.00444444	0.00181048	0.00331892
7000	0	0.0178571	0	0	0	0	0	0	0	0.00888889	0.0026746	0.00602176
7100	0	0.00892857	0	0	0	0.00934579	0.00617284	0	0	0	0.00244472	0.00401941
7200	0	0	0.00746269	0	0	0	0	0	0	0.0133333	0.0020796	0.00459737
7300	0	0	0.00746269	0	0	0	0	0	0	0	0.000746269	0.00235991
7400	0	0	0.00746269	0	0.00632911	0	0.00617284	0	0	0	0.00199646	0.00323169
7500	0	0	0	0	0	0	0	0	0	0	0	0
7600	0.0121951	0	0	0	0	0	0	0	0	0	0.00121951	0.00385644
7700	0	0	0	0	0	0	0	0	0	0.00444444	0.000444444	0.00140546
7800	0.0121951	0	0	0.0075188	0	0.0186916	0	0	0	0	0.00384055	0.00672582
7900	0	0	0.0149254	0	0	0.00934579	0	0	0	0	0.00242712	0.00528311
8000	0	0	0	0	0	0.00934579	0	0	0	0	0.000934579	0.0029554
8100	0	0	0	0	0	0	0	0	0	0.00444444	0.000444444	0.00140546
8200	0	0	0.00746269	0	0	0	0.00617284	0	0	0.00888889	0.00225244	0.00368289
8300	0.0121951	0	0	0	0	0.00934579	0	0	0	0	0.00215409	0.00459062
8400	0	0	0	0.0037594	0	0	0.0123457	0	0	0	0.00161051	0.00395266
8500	0	0.00892857	0.00746269	0	0	0	0	0	0	0	0.00163913	0.00347281
8600	0.0121951	0.00892857	0	0	0.00632911	0	0.00617284	0	0	0	0.00336256	0.00463721
8700	0	0.00892857	0	0	0	0	0.00617284	0	0	0	0.00151014	0.00324924
8800	0	0	0	0	0.00632911	0	0	0.0026455	0	0	0.000897462	0.00208172
8900	0.0121951	0	0	0	0	0.00934579	0	0	0	0.00444444	0.00259854	0.00457401
9000	0	0	0	0	0	0.00934579	0	0.0026455	0	0	0.00119913	0.00298074
9100	0.0121951	0	0	0	0	0	0	0	0	0	0.00121951	0.00385644
9200	0	0	0	0	0	0	0	0	0.0049505	0	0.00049505	0.00156548
9300	0	0	0	0	0	0.0186916	0	0	0	0	0.00186916	0.0059108
9400	0	0.00892857	0	0	0	0	0	0	0	0.00444444	0.0013373	0.00301088
9500	0	0	0.00746269	0	0	0	0.00617284	0	0	0	0.00136355	0.00289065
9600	0	0.00892857	0	0	0	0	0	0	0	0.00444444	0.0013373	0.00301088
9700	0	0	0	0	0.00632911	0.00934579	0	0	0	0	0.00156749	0.00338019
9800	0	0	0	0	0.00632911	0	0	0	0.0049505	0	0.00112796	0.00240005
9900	0	0	0	0	0	0	0	0	0	0	0	0
10000	0.0121951	0	0	0	0	0	0	0	0	0.00444444	0.00166396	0.00395512
10100	0	0.00892857	0	0	0	0	0.00617284	0	0	0	0.00151014	0.00324924
10200	0	0	0	0	0	0	0	0	0	0.00444444	0.000444444	0.00140546
10300	0	0.00892857	0	0	0	0	0	0	0	0	0.000892857	0.00282346
10400	0	0	0	0	0	0	0	0	0	0	0	0
10500	0	0	0	0	0	0	0	0	0	0	0	0
10600	0	0	0	0	0	0	0	0	0	0.00444444	0.000444444	0.00140546
10700	0	0	0	0	0	0	0	0	0	0	0	0
10800	0	0.00892857	0	0	0	0	0	0	0	0	0.000892857	0.00282346
10900	0	0	0	0	0	0	0	0	0	0	0	0
11000	0	0	0.00746269	0	0	0	0	0	0	0	0.000746269	0.00235991
11100	0	0	0	0	0.00632911	0	0.00617284	0	0	0	0.0012502	0.0026359
11200	0	0	0	0	0	0.00934579	0	0	0	0	0.000934579	0.0029554
11300	0	0.00892857	0	0	0.00632911	0	0	0	0	0	0.00152577	0.00327444
11400	0	0	0	0	0	0	0	0	0	0	0	0
11500	0	0	0	0	0.00632911	0	0	0	0	0	0.000632911	0.00200144
11600	0	0	0	0	0	0	0	0	0	0	0	0
11700	0	0	0.00746269	0	0	0	0.00617284	0	0	0	0.00136355	0.00289065
11800	0	0	0	0	0	0	0	0	0	0	0	0
11900	0	0	0	0	0	0.0186916	0.00617284	0	0	0	0.00248644	0.00601531
12000	0	0	0	0	0	0	0	0	0	0	0	0
12100	0	0.0178571	0	0	0	0	0	0	0	0	0.00178571	0.00564692
12200	0	0	0.00746269	0	0	0	0	0	0	0	0.000746269	0.00235991
12300	0	0.00892857	0.00746269	0	0	0	0	0	0	0	0.00163913	0.00347281
12400	0	0.00892857	0	0	0	0	0	0	0	0	0.000892857	0.00282346
12500	0	0	0	0	0	0	0	0	0	0	0	0
12600	0	0	0	0	0	0	0	0	0	0	0	0
12700	0	0	0	0	0	0	0.00617284	0	0	0	0.000617284	0.00195202
12800	0	0	0	0	0	0	0	0	0	0	0	0
12900	0	0	0	0	0	0	0	0	0	0	0	0
13000	0	0	0	0	0	0	0	0	0	0	0	0
13100	0.0121951	0	0	0	0.00632911	0	0	0	0	0	0.00185242	0.00414278
13200	0	0	0	0	0	0	0	0	0	0	0	0
13300	0	0	0	0	0	0	0	0	0	0	0	0
13400	0	0	0	0	0	0	0	0	0	0	0	0
13500	0	0	0	0	0	0	0	0.0026455	0	0	0.00026455	0.000836581
13600	0	0	0	0	0	0	0	0	0	0	0	0
13700	0.0121951	0	0	0	0	0	0	0	0	0	0.00121951	0.00385644
13800	0.0121951	0	0	0	0	0	0	0	0	0	0.00121951	0.00385644
13900	0.0121951	0	0	0.0075188	0	0	0	0	0	0	0.00197139	0.00429973
14000	0	0	0	0	0	0	0	0	0	0	0	0
14100	0	0.00892857	0	0	0	0	0	0	0	0	0.000892857	0.00282346
14200	0.0121951	0	0	0	0	0	0	0	0	0	0.00121951	0.00385644
14300	0	0	0	0	0	0	0	0	0	0	0	0
14400	0	0	0	0	0	0	0	0	0	0	0	0
14500	0	0	0	0	0	0	0	0	0	0	0	0
14600	0	0	0	0	0.00632911	0	0	0	0	0	0.000632911	0.00200144
14700	0	0	0	0	0	0	0	0	0	0	0	0
14800	0.0121951	0	0	0	0	0	0	0	0	0	0.00121951	0.00385644
14900	0	0	0	0	0	0.0186916	0	0	0	0	0.00186916	0.0059108
15000	0	0	0	0	0	0	0	0	0	0	0	0
15100	0	0	0	0	0	0	0	0	0	0	0	0
15200	0	0.00892857	0	0	0	0	0	0	0	0	0.000892857	0.00282346
15300	0	0.00892857	0	0	0	0	0	0	0	0	0.000892857	0.00282346
15400	0	0	0	0	0	0	0	0	0	0	0	0
15500	0	0	0	0	0	0	0	0	0	0	0	0
15600	0	0	0	0	0	0.00934579	0	0	0	0	0.000934579	0.0029554
15700	0	0	0	0	0	0	0	0	0	0	0	0
15800	0	0	0	0	0	0	0	0	0	0	0	0
15900	0	0	0	0	0	0	0	0	0	0	0	0
16000	0	0	0	0	0	0.00934579	0	0	0	0	0.000934579	0.0029554
16100	0	0	0	0	0	0	0	0	0	0	0	0
16200	0	0	0	0	0	0	0	0	0	0	0	0
16300	0	0	0	0	0	0	0	0	0	0	0	0
16400	0	0	0	0	0	0	0	0	0	0	0	0
16500	0	0	0	0	0	0	0	0	0	0	0	0
16600	0	0	0	0	0	0	0	0	0	0	0	0
16700	0	0	0	0	0	0	0	0	0	0	0	0
16800	0	0	0	0	0	0	0	0	0	0	0	0
16900	0	0	0	0	0	0	0	0	0	0	0	0
17000	0	0	0.00746269	0	0	0	0	0	0	0	0.000746269	0.00235991
17100	0	0	0	0.0037594	0	0	0	0	0	0	0.00037594	0.00118883
17200	0	0	0	0	0	0.00934579	0	0	0	0	0.000934579	0.0029554
17300	0	0	0	0	0	0	0	0	0	0	0	0
17400	0	0	0	0	0	0	0	0	0	0	0	0
17500	0	0	0	0	0	0	0	0	0	0	0	0
17600	0	0	0	0	0	0	0	0	0	0	0	0
17700	0	0	0	0	0	0	0	0	0	0	0	0
17800	0	0	0	0	0	0	0	0	0.0049505	0	0.00049505	0.00156548
17900	0	0	0	0	0	0	0	0	0	0	0	0
18000	0	0	0	0	0	0	0	0	0	0	0	0
18100	0	0	0	0	0	0	0	0	0	0	0	0
18200	0	0	0	0	0	0	0	0	0	0	0	0
18300	0	0	0	0	0	0.00934579	0	0	0	0	0.000934579	0.0029554
18400	0	0	0	0	0	0	0	0	0	0	0	0
18500	0	0	0	0	0.00632911	0	0	0	0	0	0.000632911	0.00200144
18600	0	0	0	0	0	0	0	0	0	0	0	0
18700	0	0	0	0	0	0	0	0	0	0	0	0
18800	0	0	0	0	0	0	0	0	0	0	0	0
18900	0	0	0	0	0	0	0	0	0	0	0	0
19000	0	0	0	0	0	0	0	0	0	0	0	0
19100	0	0	0	0	0	0	0	0	0	0	0	0
19200	0	0	0	0	0	0	0	0	0	0	0	0
19300	0	0	0	0	0	0.00934579	0	0	0	0	0.000934579	0.0029554
19400	0	0	0	0	0	0	0	0	0	0	0	0
19500	0	0	0	0	0	0	0	0	0	0	0	0
19600	0	0	0	0	0	0	0	0	0	0	0	0
19700	0	0	0	0	0	0	0	0	0	0	0	0
19800	0	0	0	0	0	0	0	0	0	0	0	0
19900	0.0121951	0	0	0	0	0	0	0	0	0	0.00121951	0.00385644
20000	0	0	0	0	0	0	0	0	0	0	0	0
20100	0	0	0	0	0	0	0	0	0	0	0	0
20200	0	0	0	0	0	0	0	0	0	0	0	0
20300	0	0	0	0	0.00632911	0	0	0	0	0	0.000632911	0.00200144
20400	0	0	0	0	0	0	0	0	0	0	0	0
20500	0	0	0	0	0	0	0	0	0	0	0	0
20600	0	0	0	0	0	0	0	0	0	0	0	0
20700	0	0	0	0	0	0	0	0	0	0	0	0
20800	0	0	0	0	0	0	0	0	0	0	0	0
20900	0	0	0	0	0	0	0	0	0	0	0	0
21000	0	0	0.00746269	0	0	0	0	0	0	0	0.000746269	0.00235991
21100	0	0	0	0	0	0	0	0	0	0	0	0
21200	0	0.00892857	0	0	0	0	0	0	0	0	0.000892857	0.00282346
21300	0	0.00892857	0	0	0	0	0	0	0	0	0.000892857	0.00282346
21400	0	0	0	0	0	0	0	0	0	0	0	0
21500	0	0	0	0	0	0	0	0	0	0	0	0
21600	0	0	0	0	0	0	0	0	0	0	0	0
21700	0	0	0	0	0	0	0	0	0	0	0	0
21800	0	0	0	0	0	0	0	0	0	0	0	0
21900	0	0	0	0	0	0	0	0	0	0	0	0
22000	0	0	0	0	0	0	0	0	0	0	0	0
22100	0	0	0	0	0	0	0	0	0	0	0	0
22200	0	0	0	0	0	0	0	0	0	0	0	0
22300	0	0	0	0	0	0	0	0	0	0	0	0
22400	0	0	0	0	0	0	0	0	0	0	0	0
22500	0	0	0	0	0	0.00934579	0	0	0	0	0.000934579	0.0029554
22600	0	0	0	0	0	0	0	0	0	0	0	0
22700	0	0	0	0	0	0.00934579	0	0	0	0	0.000934579	0.0029554
22800	0	0	0	0	0	0	0	0	0	0	0	0
22900	0	0	0	0	0	0	0	0	0	0.00444444	0.000444444	0.00140546
23000	0	0	0	0	0.00632911	0	0	0	0	0	0.000632911	0.00200144
23100	0	0	0	0	0	0	0	0	0	0	0	0
23200	0	0	0	0	0	0	0	0	0	0	0	0
23300	0	0	0	0	0	0	0	0	0	0	0	0
23400	0	0	0	0	0	0	0	0	0	0	0	0
23500	0	0	0	0	0	0	0	0	0	0	0	0
23600	0	0	0	0	0	0	0	0	0	0	0	0
23700	0	0	0	0	0	0	0	0	0	0	0	0
23800	0	0	0	0	0	0	0	0	0	0	0	0
23900	0	0	0	0	0	0	0	0	0	0	0	0
24000	0	0	0	0	0	0	0	0	0	0	0	0
24100	0	0	0	0	0	0	0	0	0	0	0	0
24200	0	0	0	0	0	0	0	0	0	0	0	0
24300	0	0	0	0	0	0	0	0	0	0	0	0
24400	0	0	0	0	0	0	0	0	0	0	0	0
24500	0	0	0	0	0	0	0	0	0	0	0	0
24600	0	0	0	0	0	0	0	0	0	0	0	0
24700	0	0	0	0	0.00632911	0	0	0	0	0	0.000632911	0.00200144
24800	0	0	0	0	0	0	0	0	0	0	0	0
24900	0	0	0	0	0	0	0	0	0	0	0	0
25000	0	0	0	0	0	0	0	0	0	0	0	0
25100	0	0	0	0	0	0	0	0	0	0	0	0
25200	0	0	0	0	0	0	0	0	0	0	0	0
25300	0	0	0	0	0	0	0	0	0	0	0	0
25400	0	0	0	0	0	0	0	0	0	0	0	0
25500	0	0	0	0	0	0	0	0	0	0	0	0
25600	0	0	0	0	0	0	0	0	0	0	0	0
25700	0	0.00892857	0	0	0	0	0	0	0	0	0.000892857	0.00282346
25800	0	0	0	0	0	0	0	0	0	0	0	0
25900	0	0	0	0	0	0	0	0	0	0	0	0
26000	0	0	0	0	0	0	0	0	0	0	0	0
26100	0	0	0	0	0	0	0.00617284	0	0	0	0.000617284	0.00195202
26200	0.0121951	0	0	0	0	0	0	0	0	0	0.00121951	0.00385644
26300	0	0	0	0	0	0	0	0	0	0	0	0
26400	0	0	0	0	0	0	0	0	0	0	0	0
26500	0	0	0	0	0	0	0	0	0	0	0	0
26600	0	0	0	0	0.00632911	0	0	0	0	0	0.000632911	0.00200144
26700	0	0	0	0	0	0	0	0	0	0	0	0
26800	0	0	0	0	0	0	0	0	0	0	0	0
26900	0	0	0	0	0	0	0	0	0	0	0	0
27000	0	0	0	0	0	0	0	0	0	0	0	0
27100	0.0121951	0	0	0	0	0	0	0	0	0	0.00121951	0.00385644
27200	0	0	0	0	0	0	0	0	0	0	0	0
27300	0	0	0	0	0	0	0	0	0	0	0	0
27400	0	0	0	0	0	0	0	0	0	0	0	0
27500	0	0	0	0	0	0	0	0	0	0	0	0
27600	0	0	0	0	0	0	0	0	0	0	0	0
27700	0	0	0	0	0	0	0	0	0	0	0	0
27800	0	0	0	0	0	0	0	0	0	0	0	0
27900	0	0	0	0	0	0	0	0	0	0	0	0
28000	0	0	0	0	0	0.00934579	0	0	0	0	0.000934579	0.0029554
28100	0	0	0	0	0	0	0	0	0	0	0	0
28200	0	0	0	0	0	0	0	0	0	0	0	0
28300	0	0	0	0	0	0	0	0	0	0	0	0
28400	0	0	0.00746269	0	0	0	0	0	0	0	0.000746269	0.00235991
28500	0	0	0	0	0	0	0	0	0	0	0	0
28600	0	0	0	0	0	0	0	0	0	0	0	0
28700	0	0	0	0	0	0	0	0	0	0	0	0
28800	0	0	0	0	0	0	0	0	0	0	0	0
28900	0	0	0	0	0	0	0	0	0	0	0	0
29000	0	0	0	0	0	0	0	0	0	0	0	0
29100	0	0	0	0	0	0	0	0	0	0	0	0
29200	0	0	0	0	0	0	0	0	0	0	0	0
29300	0	0	0	0	0	0	0	0	0	0	0	0
29400	0	0	0	0	0	0	0	0	0	0	0	0
29500	0	0	0	0	0	0	0	0	0	0	0	0
29600	0	0	0	0	0	0	0	0	0	0	0	0
29700	0	0	0	0	0	0	0	0	0	0	0	0
29800	0	0	0	0	0	0	0	0	0	0	0	0
29900	0	0	0	0	0	0	0	0	0	0	0	0
30000	0	0	0	0	0	0	0	0	0	0	0	0
30100	0	0	0	0	0	0	0	0	0	0	0	0
30200	0	0	0	0	0	0	0	0	0	0	0	0
30300	0.0121951	0	0	0	0	0	0	0	0	0	0.00121951	0.00385644
30400	0	0	0	0	0	0	0	0	0	0	0	0
30500	0	0	0	0	0	0	0	0	0	0	0	0
30600	0	0	0	0	0	0	0	0	0	0	0	0
30700	0	0	0	0	0	0	0	0	0	0	0	0
30800	0	0	0	0	0	0.00934579	0	0	0	0	0.000934579	0.0029554
30900	0	0	0	0	0	0	0	0	0	0	0	0
31000	0	0	0	0	0	0	0	0	0	0	0	0
31100	0	0	0	0	0	0	0	0	0	0	0	0
31200	0	0	0	0	0	0	0	0	0	0	0	0
31300	0	0	0	0	0	0	0	0	0	0	0	0
31400	0	0	0	0	0	0	0	0	0	0	0	0
31500	0	0	0	0	0	0	0	0	0	0	0	0
31600	0	0	0	0	0	0	0	0	0	0	0	0
31700	0	0	0	0	0	0	0	0	0	0	0	0
31800	0	0	0	0	0	0	0	0	0	0	0	0
31900	0	0	0.00746269	0	0	0	0	0	0	0	0.000746269	0.00235991
32000	0	0	0	0	0	0	0	0	0	0	0	0
32100	0	0	0	0	0	0	0	0	0	0	0	0
32200	0	0	0	0	0	0	0	0	0	0	0	0
32300	0	0	0	0	0	0	0	0	0	0	0	0
32400	0	0	0	0	0	0	0	0	0	0	0	0
32500	0	0	0	0	0	0	0	0	0	0	0	0
32600	0	0	0	0	0	0	0	0	0	0	0	0
32700	0	0	0	0	0	0	0	0	0	0	0	0
32800	0	0	0	0	0	0	0	0	0	0	0	0
32900	0	0	0	0	0	0	0	0	0	0	0	0
33000	0	0	0	0	0	0	0	0	0	0	0	0
33100	0	0	0	0	0	0	0	0	0	0	0	0
33200	0	0	0	0	0	0	0	0	0	0	0	0
33300	0	0	0	0	0	0	0	0	0	0	0	0
33400	0	0	0	0	0	0	0	0	0	0	0	0
33500	0	0	0	0	0	0	0	0	0	0	0	0
33600	0	0	0	0	0	0	0	0	0	0	0	0
33700	0	0	0	0	0	0	0	0	0	0	0	0
33800	0	0	0	0	0	0	0	0	0	0	0	0
33900	0	0	0	0	0	0	0	0	0	0	0	0
34000	0	0	0	0	0	0	0	0	0	0	0	0
34100	0	0	0	0	0	0	0	0	0	0	0	0
34200	0	0	0	0	0.00632911	0	0	0	0	0	0.000632911	0.00200144
34300	0	0	0	0	0.00632911	0	0	0	0	0	0.000632911	0.00200144
34400	0	0	0	0	0	0	0	0	0	0	0	0
34500	0	0	0	0	0	0	0	0	0	0	0	0
34600	0	0	0	0	0	0	0	0	0	0	0	0
34700	0	0	0	0	0	0	0	0	0	0	0	0
34800	0	0	0	0	0	0	0	0	0	0	0	0
34900	0	0	0	0	0	0	0	0	0	0	0	0
35000	0	0	0	0	0	0	0	0	0	0	0	0
35100	0	0	0	0	0	0	0	0	0	0	0	0
35200	0	0	0	0	0	0	0	0	0	0	0	0
35300	0	0	0	0	0	0	0	0	0	0	0	0
35400	0	0	0	0	0	0	0	0	0	0	0	0
35500	0	0	0	0	0	0	0	0	0	0	0	0
35600	0	0	0	0	0	0	0	0	0	0	0	0
35700	0	0	0	0	0	0	0	0	0	0	0	0
35800	0	0	0	0	0	0	0	0	0.0049505	0	0.00049505	0.00156548
35900	0	0	0	0	0	0	0	0	0	0	0	0
36000	0	0	0	0	0	0	0	0	0	0	0	0
36100	0	0	0	0	0	0	0	0	0	0	0	0
36200	0	0	0	0	0	0	0	0	0	0	0	0
36300	0	0	0	0	0	0	0	0	0	0	0	0
36400	0	0	0	0	0	0	0	0	0	0	0	0
36500	0	0	0	0	0	0	0	0	0	0	0	0
36600	0	0	0	0	0	0	0	0	0	0	0	0
36700	0	0	0	0	0	0	0	0	0	0	0	0
36800	0	0	0	0	0	0	0	0	0	0	0	0
36900	0	0	0	0	0	0	0	0	0	0	0	0
37000	0	0	0	0	0	0	0	0	0	0	0	0
37100	0	0	0	0	0	0	0	0	0	0	0	0
37200	0	0	0	0	0	0	0	0	0	0	0	0
37300	0	0	0	0	0	0	0	0	0	0	0	0
37400	0	0	0	0	0	0	0	0	0	0	0	0
37500	0	0	0.00746269	0	0	0	0	0	0	0	0.000746269	0.00235991
37600	0	0	0	0	0	0	0	0	0	0	0	0
37700	0	0	0	0	0	0	0	0	0	0	0	0
37800	0	0	0	0	0	0	0	0	0	0	0	0
37900	0	0	0	0	0	0	0	0	0	0	0	0
38000	0	0	0	0	0	0	0	0	0	0	0	0
38100	0	0	0	0	0	0	0	0	0	0	0	0
38200	0	0	0	0	0	0	0	0	0	0	0	0
38300	0	0	0	0	0	0	0	0	0	0	0	0
38400	0	0	0	0	0	0	0	0	0	0	0	0
38500	0	0	0	0	0	0	0	0	0	0	0	0
38600	0	0	0	0	0	0	0	0	0	0	0	0
38700	0	0	0	0	0	0	0	0	0	0	0	0
38800	0	0	0	0	0	0	0	0	0	0	0	0
38900	0	0	0	0	0	0	0	0	0	0	0	0
39000	0	0	0	0	0	0	0	0	0	0	0	0
39100	0	0	0	0	0	0	0	0	0	0	0	0
39200	0	0	0	0	0	0	0	0	0	0	0	0
39300	0	0	0	0.0037594	0	0	0	0	0	0	0.00037594	0.00118883
39400	0	0	0	0	0	0	0	0	0	0	0	0
39500	0	0	0	0	0	0	0	0	0	0	0	0
39600	0	0	0.00746269	0	0	0	0	0	0	0	0.000746269	0.00235991
39700	0	0	0	0	0	0	0	0	0	0	0	0
39800	0	0	0	0	0	0	0	0	0	0	0	0
39900	0	0	0	0	0	0	0	0	0	0	0	0
40000	0	0	0	0	0	0	0	0	0	0	0	0
40100	0	0	0	0	0	0	0	0	0	0	0	0
40200	0	0	0	0	0	0	0	0	0	0	0	0
40300	0	0	0	0	0	0	0	0	0	0	0	0
40400	0	0	0	0	0	0	0	0	0	0	0	0
40500	0	0	0	0	0	0	0	0	0	0	0	0
40600	0	0	0	0	0	0	0	0	0	0	0	0
40700	0	0	0	0	0	0	0	0	0	0	0	0
40800	0	0	0	0	0	0	0	0	0	0	0	0
40900	0	0	0	0	0	0	0	0	0	0	0	0
41000	0	0	0	0	0	0	0	0	0	0	0	0
41100	0	0	0	0	0	0	0	0	0	0	0	0
41200	0	0	0	0	0	0	0	0	0	0	0	0
41300	0	0	0	0	0	0	0	0	0	0	0	0
41400	0	0	0	0	0	0	0	0	0	0	0	0
41500	0	0	0	0	0	0	0	0	0	0	0	0
41600	0	0	0	0	0	0	0	0	0	0	0	0
41700	0	0	0	0	0	0	0	0	0	0	0	0
41800	0	0	0	0	0	0	0	0	0	0	0	0
41900	0	0	0	0	0	0	0	0	0	0	0	0
42000	0	0	0	0	0	0	0	0	0	0	0	0
42100	0	0	0	0	0	0	0	0	0	0	0	0
42200	0	0	0	0	0	0	0	0	0	0	0	0
42300	0	0	0	0	0	0	0	0	0	0	0	0
42400	0	0	0	0	0	0	0	0	0	0	0	0
42500	0	0	0	0	0	0	0	0	0	0	0	0
42600	0	0	0	0	0	0	0	0	0	0	0	0
42700	0	0	0	0	0	0	0	0	0	0	0	0
42800	0	0	0	0	0	0	0	0	0	0	0	0
42900	0	0	0	0	0	0	0	0	0	0	0	0
43000	0	0	0	0	0	0	0	0	0	0	0	0
43100	0	0	0	0	0	0	0	0	0	0.00444444	0.000444444	0.00140546
43200	0	0	0	0	0	0	0	0	0	0	0	0
43300	0	0	0	0	0	0	0	0	0	0	0	0
43400	0	0	0	0	0	0	0	0	0	0	0	0
43500	0	0	0	0	0	0	0	0	0	0	0	0
43600	0	0	0	0	0	0	0	0	0	0	0	0
43700	0	0	0	0	0	0	0	0	0	0	0	0
43800	0	0	0	0	0	0	0	0	0	0	0	0
43900	0	0	0	0	0	0	0	0	0	0	0	0
44000	0	0	0	0	0	0	0	0	0	0	0	0
44100	0	0	0	0	0	0	0	0	0	0	0	0
44200	0	0	0	0	0	0	0	0	0	0	0	0
44300	0	0	0	0	0	0	0	0	0	0	0	0
44400	0	0	0	0	0	0	0	0	0	0	0	0
44500	0	0	0	0	0	0	0	0	0	0	0	0
44600	0	0	0	0	0	0	0	0	0	0	0	0
44700	0	0	0	0	0	0	0	0	0	0	0	0
44800	0	0	0	0	0	0	0	0	0	0	0	0
44900	0	0	0	0	0	0	0	0	0	0	0	0
45000	0	0	0	0	0	0	0	0	0	0	0	0
45100	0	0	0	0	0	0	0	0	0	0	0	0
45200	0	0	0	0	0	0	0	0	0	0	0	0
45300	0	0	0	0	0	0	0	0	0	0	0	0
45400	0	0	0	0	0	0	0	0	0	0	0	0
45500	0.0121951	0	0	0	0	0	0	0	0	0	0.00121951	0.00385644
45600	0	0	0	0	0	0	0	0	0	0	0	0
45700	0	0	0	0	0	0	0	0	0	0	0	0
45800	0	0	0	0	0	0	0	0	0	0	0	0
45900	0	0	0	0	0	0	0	0	0	0	0	0
46000	0	0	0	0	0	0	0	0	0	0	0	0
46100	0	0	0	0	0	0	0	0	0	0	0	0
46200	0	0	0	0	0	0	0.00617284	0	0	0	0.000617284	0.00195202
46300	0	0	0	0	0	0	0	0	0	0	0	0
46400	0	0	0	0	0	0.00934579	0	0	0	0	0.000934579	0.0029554
46500	0	0	0	0	0	0	0	0	0	0	0	0
46600	0	0	0	0	0	0	0	0	0	0	0	0
46700	0	0	0	0	0	0	0	0	0	0	0	0
46800	0	0	0	0	0	0	0	0	0	0	0	0
46900	0	0	0	0	0	0	0	0	0	0	0	0
47000	0	0	0	0	0	0	0	0	0	0	0	0
47100	0	0	0	0	0	0	0	0	0	0	0	0
47200	0	0	0	0	0	0	0	0	0	0	0	0
47300	0	0	0	0	0	0	0	0	0	0	0	0
47400	0	0	0	0	0	0	0	0	0	0	0	0
47500	0	0	0	0	0	0	0	0	0	0	0	0
47600	0	0	0	0	0	0	0	0	0	0	0	0
47700	0	0	0	0	0	0	0	0	0	0	0	0
47800	0	0	0	0	0	0	0	0	0	0	0	0
47900	0	0	0	0	0	0	0	0	0	0	0	0
48000	0	0	0	0	0	0	0	0	0	0	0	0
48100	0	0	0	0	0	0	0	0	0	0	0	0
48200	0	0	0	0	0	0	0	0	0	0	0	0
48300	0	0	0	0	0	0	0	0	0	0	0	0
48400	0	0	0	0	0	0	0	0	0	0	0	0
48500	0	0	0	0	0	0	0	0	0	0	0	0
48600	0	0	0	0	0	0	0	0	0	0	0	0
48700	0	0	0	0	0	0	0	0	0	0	0	0
48800	0.0121951	0	0	0	0	0	0	0	0	0	0.00121951	0.00385644
48900	0	0	0	0	0	0	0	0	0	0	0	0
49000	0	0	0	0	0	0	0	0	0	0	0	0
49100	0	0	0	0	0	0	0	0	0	0	0	0
49200	0	0	0	0	0	0	0	0	0	0	0	0
49300	0	0	0	0	0	0	0	0	0	0	0	0
49400	0	0	0	0	0	0	0	0	0	0	0	0
49500	0	0	0	0	0	0	0	0	0	0	0	0
49600	0	0	0	0	0	0	0	0	0	0	0	0
49700	0	0	0	0	0	0	0	0	0	0	0	0
49800	0	0	0	0	0	0	0	0	0	0	0	0
49900	0	0	0	0	0	0	0	0	0	0	0	0
50000	0	0	0	0	0	0	0	0	0	0	0	0
50100	0	0	0	0	0	0	0	0	0	0	0	0
50200	0	0	0	0	0	0	0	0	0	0	0	0
50300	0	0	0	0	0	0	0	0	0	0	0	0
50400	0	0	0	0	0	0	0	0	0	0	0	0
50500	0	0	0	0	0	0	0	0	0	0	0	0
50600	0	0	0	0	0	0	0	0	0	0	0	0
50700	0	0	0	0	0	0	0	0	0	0	0	0
50800	0	0	0	0	0	0	0	0	0	0	0	0
50900	0	0	0	0	0	0	0	0	0	0	0	0
51000	0	0	0	0	0	0	0	0	0	0	0	0
51100	0	0	0	0	0	0	0	0	0	0	0	0
51200	0	0	0	0	0	0	0	0	0	0	0	0
51300	0	0	0	0	0	0	0	0	0	0	0	0
51400	0	0	0	0	0	0	0	0	0	0	0	0
51500	0	0	0	0	0	0	0	0	0	0	0	0
51600	0	0	0	0	0	0	0	0	0	0	0	0
51700	0	0	0	0	0	0	0	0	0	0	0	0
51800	0	0	0	0	0	0	0	0	0	0	0	0
51900	0	0	0	0	0	0	0	0	0	0	0	0
52000	0	0	0	0	0	0	0	0	0	0	0	0
52100	0	0	0	0	0	0	0	0	0	0	0	0
52200	0	0	0	0	0	0	0	0	0	0	0	0
52300	0	0	0	0	0	0	0	0	0	0	0	0
52400	0	0	0	0	0	0	0	0	0	0	0	0
52500	0	0	0	0	0	0	0	0	0	0	0	0
52600	0	0	0	0	0	0	0	0	0	0	0	0
52700	0	0	0	0	0	0	0	0	0	0	0	0
52800	0	0	0	0	0	0	0	0	0	0	0	0
52900	0	0	0	0	0	0	0	0	0	0	0	0
53000	0	0	0	0	0	0	0	0	0	0	0	0
53100	0	0	0	0	0	0	0	0	0	0	0	0
53200	0	0	0	0	0	0	0	0	0	0	0	0
53300	0.0121951	0	0	0	0	0	0	0	0	0	0.00121951	0.00385644
53400	0	0	0	0	0	0	0	0	0	0	0	0
53500	0	0	0	0	0	0	0	0	0	0	0	0
53600	0	0	0	0	0	0	0	0	0	0	0	0
53700	0	0	0	0	0	0	0	0	0	0	0	0
53800	0	0	0	0	0	0	0	0	0	0	0	0
53900	0	0	0	0	0	0	0	0	0	0	0	0
54000	0	0	0	0	0	0	0	0	0	0	0	0
54100	0	0	0	0	0	0	0	0	0	0	0	0
54200	0	0	0	0	0	0	0	0	0	0	0	0
54300	0	0	0	0	0	0	0	0	0	0	0	0
54400	0	0	0	0	0	0	0	0	0	0	0	0
54500	0	0	0	0	0	0	0	0	0	0	0	0
54600	0	0	0	0	0	0	0	0	0	0	0	0
54700	0	0	0	0	0	0	0	0	0	0	0	0
54800	0	0	0	0	0	0	0	0	0	0	0	0
54900	0	0	0	0	0	0	0	0	0	0	0	0
55000	0	0	0	0	0	0	0	0	0	0	0	0
55100	0	0	0	0	0	0	0	0	0	0	0	0
55200	0	0	0	0	0	0	0	0	0	0	0	0
55300	0	0	0	0	0	0	0	0	0	0	0	0
55400	0	0	0	0	0	0	0	0	0	0	0	0
55500	0	0	0	0	0	0	0	0	0	0	0	0
55600	0	0	0	0	0	0	0	0	0	0	0	0
55700	0	0	0	0	0	0	0	0	0	0	0	0
55800	0	0	0	0	0	0	0	0	0	0	0	0
55900	0	0	0	0	0	0	0	0	0	0	0	0
56000	0	0	0	0	0	0	0	0	0	0	0	0
56100	0	0	0	0	0	0	0	0	0	0	0	0
56200	0	0	0	0	0	0	0	0	0	0	0	0
56300	0	0	0	0	0	0	0	0	0	0	0	0
56400	0	0	0	0	0	0	0	0	0	0	0	0
56500	0	0	0	0	0	0	0	0	0	0	0	0
56600	0	0	0	0	0	0	0	0	0	0	0	0
56700	0	0	0	0	0	0	0	0	0	0	0	0
56800	0	0	0	0	0	0	0	0	0	0	0	0
56900	0	0	0	0	0	0	0	0	0	0	0	0
57000	0	0	0	0	0	0	0	0	0	0	0	0
57100	0	0	0	0	0	0	0	0	0	0	0	0
57200	0	0	0	0	0	0	0	0	0	0	0	0
57300	0	0	0	0	0	0	0	0	0	0	0	0
57400	0	0	0	0	0	0	0	0	0	0	0	0
57500	0	0	0	0	0	0	0	0	0	0	0	0
57600	0	0	0	0	0	0	0	0	0	0	0	0
57700	0	0	0	0	0	0	0	0	0	0	0	0
57800	0	0	0	0	0	0	0	0	0	0	0	0
57900	0	0	0	0	0	0	0	0	0	0	0	0
58000	0	0	0	0	0	0	0	0	0	0	0	0
58100	0	0	0	0	0	0	0	0	0	0	0	0
58200	0	0.00892857	0	0	0	0	0	0	0	0	0.000892857	0.00282346
58300	0	0	0	0	0	0	0	0	0	0	0	0
58400	0	0	0	0	0	0	0	0	0	0	0	0
58500	0	0	0	0	0	0	0	0	0	0	0	0
58600	0	0	0	0	0	0	0	0	0	0	0	0
58700	0	0	0	0	0	0	0	0	0	0	0	0
58800	0	0	0	0	0	0	0	0	0	0	0	0
58900	0	0	0	0	0	0	0	0	0	0	0	0
59000	0	0	0	0	0	0	0	0	0	0	0	0
59100	0	0	0	0	0	0	0	0	0	0	0	0
59200	0	0	0	0	0	0	0	0	0	0	0	0
59300	0	0	0	0	0	0	0	0	0	0	0	0
59400	0	0	0	0	0	0	0	0	0	0	0	0
59500	0	0	0	0	0	0	0	0	0	0	0	0
59600	0	0	0	0	0	0	0	0	0	0	0	0
59700	0	0	0	0	0	0	0	0	0	0	0	0
59800	0	0	0	0	0	0	0	0	0	0	0	0
59900	0	0	0	0	0	0	0	0	0	0	0	0
60000	0	0	0	0	0	0	0	0	0	0	0	0
60100	0	0	0	0	0	0	0	0	0	0	0	0
60200	0	0	0	0	0	0	0	0	0	0	0	0
60300	0	0	0	0	0	0	0	0	0	0	0	0
60400	0	0	0	0	0	0	0	0	0	0	0	0
60500	0	0	0	0	0	0	0	0	0	0	0	0
60600	0	0	0	0	0	0	0	0	0	0	0	0
60700	0	0	0	0	0	0	0	0	0	0	0	0
60800	0	0	0	0	0	0	0	0	0	0	0	0
60900	0	0	0	0	0	0	0	0	0	0	0	0
61000	0	0	0	0	0	0	0	0	0	0	0	0
61100	0	0	0	0	0	0	0	0	0	0	0	0
61200	0	0	0	0	0	0	0	0	0	0	0	0
61300	0	0	0	0	0	0	0	0	0	0	0	0
61400	0	0	0	0	0	0	0	0	0	0	0	0
61500	0	0	0	0	0	0	0	0	0	0	0	0
61600	0	0	0	0	0	0	0	0	0	0	0	0
61700	0	0	0	0	0	0	0	0	0	0	0	0
61800	0	0	0	0	0	0	0	0	0	0	0	0
61900	0	0	0	0	0	0	0	0	0	0	0	0
62000	0	0	0	0	0	0	0	0	0	0	0	0
62100	0	0	0	0	0	0	0	0	0	0	0	0
62200	0	0	0	0	0	0	0	0	0	0	0	0
62300	0	0	0	0	0	0	0	0	0	0	0	0
62400	0	0	0	0	0	0	0	0	0	0	0	0
62500	0	0	0	0	0	0	0	0	0	0	0	0
62600	0	0	0	0	0	0	0	0	0	0	0	0
62700	0	0	0	0	0	0	0	0	0	0	0	0
62800	0	0	0	0	0	0	0	0	0	0	0	0
62900	0	0	0	0	0	0	0	0	0	0	0	0
63000	0	0	0	0	0	0	0	0	0	0	0	0
63100	0	0	0	0	0	0	0	0	0	0	0	0
63200	0	0	0	0	0	0	0	0	0	0	0	0
63300	0	0	0	0	0	0	0	0	0	0	0	0
63400	0	0	0	0	0	0	0	0	0	0	0	0
63500	0	0	0	0	0	0	0	0	0	0	0	0
63600	0	0	0	0	0	0	0	0	0	0	0	0
63700	0	0	0	0	0	0	0	0	0	0	0	0
63800	0	0	0	0	0	0	0	0	0	0	0	0
63900	0	0	0	0	0	0	0	0	0	0	0	0
64000	0	0	0	0	0	0	0	0	0	0	0	0
64100	0	0	0	0	0	0	0	0	0	0	0	0
64200	0	0	0	0	0	0	0	0	0	0	0	0
64300	0	0	0	0	0	0	0	0	0	0	0	0
64400	0	0	0	0	0	0	0	0	0	0	0	0
64500	0	0	0	0	0	0	0	0	0	0	0	0
64600	0	0	0	0	0	0	0	0	0	0	0	0
64700	0	0	0	0	0	0	0	0	0	0	0	0
64800	0	0	0	0	0	0	0	0	0	0	0	0
64900	0	0	0	0	0	0	0	0	0	0	0	0
65000	0	0	0	0	0	0	0	0	0	0	0	0
65100	0	0	0	0	0	0	0	0	0	0	0	0
65200	0	0	0	0	0	0	0	0	0	0	0	0
65300	0	0	0	0	0	0	0	0	0	0	0	0
65400	0	0	0	0	0	0	0	0	0	0	0	0
65500	0	0	0	0	0	0	0	0	0	0	0	0
65600	0	0	0	0	0	0	0	0	0	0	0	0
65700	0	0	0	0	0	0	0	0	0	0	0	0
65800	0	0	0	0	0	0	0	0	0	0	0	0
65900	0	0	0	0	0	0	0	0	0	0	0	0
66000	0	0	0	0	0	0	0	0	0	0	0	0
66100	0	0	0	0	0	0	0	0	0	0	0	0
66200	0	0	0	0	0	0	0	0	0	0	0	0
66300	0	0	0	0	0	0	0	0	0	0	0	0
66400	0	0	0	0	0	0	0	0	0	0	0	0
66500	0	0	0	0	0	0	0	0	0	0	0	0
66600	0	0	0	0	0	0	0	0	0	0	0	0
66700	0	0	0	0	0	0	0	0	0	0	0	0
66800	0	0	0	0	0	0	0	0	0	0	0	0
66900	0	0	0	0	0	0	0	0	0	0	0	0
67000	0	0	0	0	0	0	0	0	0	0	0	0
67100	0	0	0	0	0	0	0	0	0	0	0	0
67200	0	0	0	0	0	0	0	0	0	0	0	0
67300	0	0	0	0	0	0	0	0	0	0	0	0
67400	0	0	0	0	0	0	0	0	0	0	0	0
67500	0	0	0	0	0	0	0	0	0	0	0	0
67600	0	0	0	0	0	0	0	0	0	0	0	0
67700	0	0	0	0	0	0	0	0	0	0	0	0
67800	0	0	0	0	0	0	0	0	0	0	0	0
67900	0	0	0	0	0	0	0	0	0	0	0	0
68000	0	0	0	0	0	0	0	0	0	0	0	0
68100	0	0	0	0	0	0	0	0	0	0	0	0
68200	0	0	0	0	0	0	0	0	0	0	0	0
68300	0	0	0	0	0	0	0	0	0	0	0	0
68400	0	0	0	0	0	0	0	0	0	0	0	0
68500	0	0	0	0	0	0	0	0	0	0	0	0
68600	0	0	0	0	0	0	0	0	0	0	0	0
68700	0	0	0	0	0	0	0	0	0	0	0	0
68800	0	0	0	0	0	0	0.00617284	0	0	0	0.000617284	0.00195202
68900	0	0	0	0	0	0	0	0	0	0	0	0
69000	0	0	0	0	0	0	0	0	0	0	0	0
69100	0	0	0	0	0	0	0	0	0	0	0	0
69200	0	0	0	0	0	0	0	0	0	0	0	0
69300	0	0	0	0	0	0	0	0	0	0	0	0
69400	0	0	0	0	0	0	0	0	0	0	0	0
69500	0	0	0	0	0	0	0	0	0	0	0	0
69600	0	0	0	0	0	0	0	0	0	0	0	0
69700	0	0	0	0	0	0	0	0	0	0	0	0
69800	0	0	0	0	0	0	0	0	0	0	0	0
69900	0	0	0	0	0	0	0	0	0	0	0	0
70000	0	0	0	0	0	0	0	0	0	0	0	0
70100	0	0	0	0	0	0	0	0	0	0	0	0
70200	0	0	0	0	0	0	0	0	0	0	0	0
70300	0	0	0	0	0	0	0	0	0	0	0	0
70400	0	0	0	0	0	0	0	0	0	0	0	0
70500	0	0	0	0	0	0	0	0	0	0	0	0
70600	0	0	0	0	0	0	0	0	0	0	0	0
70700	0	0	0	0	0	0	0	0	0	0	0	0
70800	0	0	0	0	0	0	0	0	0	0	0	0
70900	0	0	0	0	0	0	0	0	0	0	0	0
71000	0	0	0	0	0	0	0	0	0	0	0	0
71100	0	0	0	0	0	0	0	0	0	0	0	0
71200	0	0	0	0	0	0	0.00617284	0	0	0	0.000617284	0.00195202
71300	0	0	0	0	0	0	0	0	0	0	0	0
71400	0	0	0	0	0	0	0	0	0	0	0	0
71500	0	0	0	0	0	0	0	0	0	0	0	0
71600	0	0	0	0	0	0	0	0	0	0	0	0
71700	0	0	0	0	0	0	0	0	0	0	0	0
71800	0	0	0	0	0	0	0	0	0	0	0	0
71900	0	0	0	0	0	0	0	0	0	0	0	0
72000	0	0	0	0	0	0	0	0	0	0	0	0
72100	0	0	0	0	0	0	0	0	0	0	0	0
72200	0	0	0	0	0	0	0	0	0	0	0	0
72300	0	0	0	0	0	0	0	0	0	0	0	0
72400	0	0	0	0	0	0	0	0	0	0	0	0
72500	0	0	0	0	0	0	0	0	0	0	0	0
72600	0	0	0	0	0	0	0	0	0	0	0	0
72700	0	0	0	0	0	0	0	0	0	0	0	0
72800	0	0	0	0	0	0	0	0	0	0	0	0
72900	0	0	0	0	0	0	0	0	0	0	0	0
73000	0	0	0	0	0	0	0	0	0	0	0	0
73100	0	0	0	0	0	0	0	0	0	0	0	0
73200	0	0	0	0	0	0	0	0	0	0	0	0
73300	0	0	0	0	0	0	0	0	0	0	0	0
73400	0	0	0	0	0	0	0	0	0	0	0	0
73500	0	0	0	0	0	0	0	0	0	0	0	0
73600	0	0	0	0	0	0	0	0	0	0	0	0
73700	0	0	0	0	0	0	0	0	0	0	0	0
73800	0	0	0	0	0	0	0	0	0	0	0	0
73900	0	0	0	0	0	0	0	0	0	0	0	0
74000	0	0	0	0	0	0	0	0	0	0	0	0
74100	0	0	0	0	0	0	0	0	0	0	0	0
74200	0	0	0	0	0	0	0	0	0	0	0	0
74300	0	0	0	0	0	0	0	0	0	0	0	0
74400	0	0	0	0	0	0	0	0	0	0	0	0
74500	0	0	0	0	0	0	0	0	0	0	0	0
74600	0	0	0	0	0	0	0	0	0	0	0	0
74700	0	0	0	0	0	0	0	0	0	0	0	0
74800	0	0	0	0	0	0	0	0	0	0	0	0
74900	0	0	0	0	0	0	0	0	0	0	0	0
75000	0	0	0	0	0	0	0	0	0	0	0	0
75100	0	0	0	0	0	0	0	0	0	0	0	0
75200	0	0	0	0	0	0	0	0	0	0	0	0
75300	0	0	0	0	0	0	0	0	0	0	0	0
75400	0	0	0	0	0	0	0	0	0	0	0	0
75500	0	0	0	0	0	0	0	0	0	0	0	0
75600	0	0	0	0	0	0	0	0	0	0	0	0
75700	0	0	0	0	0	0	0	0	0	0	0	0
75800	0	0	0	0	0	0	0	0	0	0	0	0
75900	0	0	0	0	0	0	0	0	0	0	0	0
76000	0	0	0	0	0	0	0	0	0	0	0	0
76100	0	0	0	0	0	0	0	0	0	0	0	0
76200	0	0	0	0	0	0	0	0	0	0	0	0
76300	0	0	0	0	0	0	0	0	0	0	0	0
76400	0	0	0	0	0	0	0	0	0	0	0	0
76500	0	0	0	0	0	0	0	0	0	0	0	0
76600	0	0	0	0	0	0	0	0	0	0	0	0
76700	0	0	0	0	0	0	0	0	0	0	0	0
76800	0	0	0	0	0	0	0	0	0	0	0	0
76900	0	0	0	0	0	0	0	0	0	0	0	0
77000	0	0	0	0	0	0	0	0	0	0	0	0
77100	0	0	0	0	0	0	0	0	0	0	0	0
77200	0	0	0	0	0	0	0	0	0	0	0	0
77300	0	0	0	0	0	0	0	0	0	0	0	0
77400	0	0.00892857	0	0	0	0	0	0	0	0	0.000892857	0.00282346
77500	0	0	0	0	0	0	0	0	0	0	0	0
77600	0	0	0	0	0	0	0	0	0	0	0	0
77700	0	0	0	0	0	0	0	0	0	0	0	0
77800	0	0	0	0	0	0	0	0	0	0	0	0
77900	0	0	0	0	0	0	0	0	0	0	0	0
78000	0	0	0	0	0	0	0	0	0	0	0	0
78100	0	0	0	0	0	0	0	0	0	0	0	0
78200	0	0	0	0	0	0	0	0	0	0	0	0
78300	0	0	0	0	0	0	0	0	0	0	0	0
78400	0	0	0	0	0	0	0	0	0	0	0	0
78500	0	0	0	0	0	0	0	0	0	0	0	0
78600	0	0	0	0	0	0	0	0	0	0	0	0
78700	0	0	0	0	0	0	0	0	0	0	0	0
78800	0	0	0	0	0	0	0	0	0	0	0	0
78900	0	0	0	0	0	0	0	0	0	0	0	0
79000	0	0	0	0	0	0	0	0	0	0	0	0
79100	0	0	0	0	0	0	0	0	0	0	0	0
79200	0	0	0	0	0	0	0	0	0	0	0	0
79300	0	0	0	0	0	0	0	0	0	0	0	0
79400	0	0	0	0	0	0	0	0	0	0	0	0
79500	0	0	0	0	0	0	0	0	0	0	0	0
79600	0	0	0	0	0	0	0	0	0	0	0	0
79700	0	0	0	0	0	0	0	0	0	0	0	0
79800	0	0	0	0	0	0	0	0	0	0	0	0
79900	0	0	0	0	0	0	0	0	0	0	0	0
80000	0	0	0	0	0	0	0	0	0	0	0	0
80100	0	0	0	0	0	0	0	0	0	0	0	0
80200	0	0	0	0	0	0	0	0	0	0	0	0
80300	0	0	0	0	0	0	0	0	0	0	0	0
80400	0	0	0	0	0	0	0	0	0	0	0	0
80500	0	0	0	0	0	0	0	0	0	0	0	0
80600	0	0	0	0	0	0	0	0	0	0	0	0
80700	0	0	0	0	0	0	0	0	0	0	0	0
80800	0	0	0	0	0	0	0	0	0	0	0	0
80900	0	0	0	0	0	0	0	0	0	0	0	0
81000	0	0	0	0	0	0	0	0	0	0	0	0
81100	0	0	0	0	0	0	0	0	0	0	0	0
81200	0	0	0	0	0	0	0	0	0	0	0	0
81300	0	0	0	0	0	0	0	0	0	0	0	0
81400	0	0	0	0	0	0	0	0	0	0	0	0
81500	0	0	0	0	0	0	0	0	0	0	0	0
81600	0	0	0	0	0	0	0	0	0	0	0	0
81700	0	0	0	0	0	0	0	0	0	0	0	0
81800	0	0	0	0	0	0	0	0	0	0	0	0
81900	0	0	0	0	0	0	0	0	0	0	0	0
82000	0	0	0	0	0	0	0	0	0	0	0	0
82100	0	0	0	0	0	0	0	0	0	0	0	0
82200	0	0	0	0	0	0	0	0	0	0	0	0
82300	0	0	0	0	0	0	0	0	0	0	0	0
82400	0	0	0	0	0	0	0	0	0	0	0	0
82500	0	0	0	0	0	0	0	0	0	0	0	0
82600	0	0	0	0	0	0	0	0	0	0	0	0
82700	0	0	0	0	0	0	0	0	0	0	0	0
82800	0	0	0	0	0	0	0	0	0	0	0	0
82900	0	0	0	0	0	0	0	0	0	0	0	0
83000	0	0	0	0	0	0	0	0	0	0	0	0
83100	0	0	0	0	0	0	0	0	0	0	0	0
83200	0	0	0	0	0	0	0	0	0	0	0	0
83300	0	0	0	0	0	0	0	0	0	0	0	0
83400	0	0	0	0	0	0	0	0	0	0	0	0
83500	0.0121951	0	0	0	0	0	0	0	0	0	0.00121951	0.00385644
83600	0	0	0	0	0	0	0	0	0	0	0	0
83700	0	0	0	0	0	0	0	0	0	0	0	0
83800	0	0	0	0	0	0	0	0	0	0	0	0
83900	0	0	0	0	0	0	0	0	0	0	0	0
84000	0	0	0	0	0	0	0	0	0	0	0	0
84100	0	0	0	0	0	0	0	0	0	0	0	0
84200	0	0	0	0	0	0	0	0	0	0	0	0
84300	0	0	0	0	0	0	0	0	0	0	0	0
84400	0	0	0	0	0	0	0	0	0	0	0	0
84500	0	0	0	0	0	0	0	0	0	0	0	0
84600	0	0	0	0	0	0	0	0	0	0	0	0
84700	0	0	0	0	0	0	0	0	0	0	0	0
84800	0	0	0	0	0	0	0	0	0	0	0	0
84900	0	0	0	0	0	0	0	0	0	0	0	0
85000	0	0	0	0	0	0	0	0	0	0	0	0
85100	0	0	0	0	0	0	0	0	0	0	0	0
85200	0	0	0	0	0	0	0	0	0	0	0	0
85300	0	0	0.00746269	0	0	0	0	0	0	0	0.000746269	0.00235991
