# Supplementary material for: State-dependent activity dynamics of hypothalamic stress effector neurons
Source: eLife. 2022 Jun 30;11:e76832. doi: 10.7554/eLife.76832 (PMC9278954; doi:10.7554/eLife.76832)
Supplement: Figure 3—source data 1. [file elife-76832-fig3-data1.xlsx]

## Sheet: Fig 3 Supplement
Figure 3 - Figure Supplement 1 - Dose Response Raster Representative Unit
0.5 mA						1.0 mA						1.5 mA						2.0 mA
All		Burst		Single		All		Burst		Single		All		Burst		Single		All		Burst		Single
Time (s)	Trial	Time (s)	Trial	Time (s)	Trial	Time (s)	Trial	Time (s)	Trial	Time (s)	Trial	Time (s)	Trial	Time (s)	Trial	Time (s)	Trial	Time (s)	Trial	Time (s)	Trial	Time (s)	Trial
-4.84739	1	-3.86382	1	-4.84739	1	-4.53862	1	-0.237238	1	-4.53862	1	-4.87905	1	-4.17888	5	-4.87905	1	-4.90642	1	-3.10106	1	-4.90642	1
-4.83629	1	-3.85943	1	-4.83629	1	-4.13398	1	-0.231667	1	-4.13398	1	-4.83457	1	-4.17749	5	-4.83457	1	-4.06493	1	-3.09918	1	-4.06493	1
-4.4833	1	-3.85472	1	-4.4833	1	-4.10342	1	-0.22495	1	-4.10342	1	-4.77583	1	-3.53843	6	-4.77583	1	-3.57378	1	-1.83392	1	-3.57378	1
-3.86382	1	-2.66565	1	-3.80451	1	-4.07868	1	-4.71041	2	-4.07868	1	-4.30823	1	-3.53376	6	-4.30823	1	-3.53729	1	-1.829	1	-3.53729	1
-3.85943	1	-2.66258	1	-0.541461	1	-3.85426	1	-4.70447	2	-3.85426	1	-4.06698	1	-3.52426	6	-4.06698	1	-3.52483	1	-3.04568	8	-3.52483	1
-3.85472	1	-2.65549	1	-4.91969	2	-3.46981	1	-4.69484	2	-3.46981	1	-4.00767	1	-0.956959	7	-4.00767	1	-3.29505	1	-3.04343	8	-3.29505	1
-3.80451	1	-1.94361	1	-4.42309	2	-3.0138	1	-3.62505	2	-3.0138	1	-3.71697	1	-0.951265	7	-3.71697	1	-3.2155	1	-0.287839	9	-3.2155	1
-2.66565	1	-1.94066	1	-3.887	2	-2.99971	1	-3.61927	2	-2.99971	1	-3.63792	1	-0.23815	7	-3.63792	1	-3.13002	1	-0.283334	9	-3.13002	1
-2.66258	1	-1.93738	1	-3.86763	2	-2.95904	1	-2.75088	4	-2.95904	1	-3.04732	1	-0.233849	7	-3.04732	1	-3.10106	1	-0.27764	9	-2.95848	1
-2.65549	1	-1.93288	1	-2.99157	2	-2.79257	1	-2.74744	4	-2.79257	1	-2.79537	1	-0.22918	7	-2.79537	1	-3.09918	1	-0.271127	9	-2.90322	1
-1.94361	1	-2.98023	2	-2.09237	2	-2.74699	1	-2.74379	4	-2.74699	1	-2.77231	1	-0.21726	7	-2.77231	1	-2.95848	1	-2.24512	10	-2.68949	1
-1.94066	1	-2.97498	2	-3.36132	3	-2.44777	1	-2.73888	4	-2.44777	1	-2.76535	1	-2.7966	8	-2.76535	1	-2.90322	1	-2.24102	10	-2.5685	1
-1.93738	1	-2.96413	2	-2.78652	3	-1.93475	1	-2.72978	4	-1.93475	1	-1.75314	1	-2.79222	8	-1.75314	1	-2.68949	1	-4.29607	15	-2.55211	1
-1.93288	1	-1.49223	2	-2.77649	3	-1.87794	1	-0.39305	4	-1.87794	1	-1.59454	1	-2.78788	8	-1.59454	1	-2.5685	1	-4.29337	15	-2.49317	1
-0.541461	1	-1.48629	2	-1.11462	3	-1.74965	1	-0.387152	4	-1.74965	1	-0.834734	1	-2.77239	8	-0.834734	1	-2.55211	1	-0.133051	16	-2.48539	1
-4.91969	2	-0.936767	2	-0.746916	3	-1.65585	1	-4.99951	5	-1.65585	1	-0.668764	1	-3.08709	9	-0.668764	1	-2.49317	1	-0.129774	16	-2.46049	1
-4.42309	2	-0.933162	2	-4.32458	4	-0.237238	1	-4.99266	5	-0.201439	1	-0.550225	1	-3.08344	9	-0.550225	1	-2.48539	1	-0.110154	16	-2.45229	1
-3.887	2	-0.929394	2	-2.62375	4	-0.231667	1	-0.668261	5	-0.143972	1	-0.438568	1	-3.30479	10	-0.438568	1	-2.46049	1	-3.88741	17	-2.43923	1
-3.86763	2	-0.925134	2	-2.4928	4	-0.22495	1	-0.665435	5	-0.119518	1	-0.147382	1	-3.30135	10	-0.147382	1	-2.45229	1	-3.8836	17	-2.42342	1
-2.99157	2	-0.907931	2	-0.282019	4	-0.201439	1	-4.90476	6	-0.0457902	1	-0.127681	1	-3.28443	10	-0.127681	1	-2.43923	1	-3.87926	17	-2.32802	1
-2.98023	2	-4.00025	3	-4.20932	5	-0.143972	1	-4.90079	6	-3.6357	2	-0.0602193	1	-1.84198	11	-0.0602193	1	-2.42342	1	-2.43616	20	-2.26662	1
-2.97498	2	-3.99726	3	-3.99382	5	-0.119518	1	-0.439499	6	-2.83313	2	-4.96716	2	-1.83912	11	-4.96716	2	-2.32802	1	-2.43247	20	-2.12347	1
-2.96413	2	-3.99432	3	-3.41596	5	-0.0457902	1	-0.435935	6	-2.82522	2	-4.93689	2	-1.83625	11	-4.93689	2	-2.26662	1	-2.42862	20	-1.9849	1
-2.09237	2	-2.04748	3	-3.22988	5	-4.71041	2	-0.431962	6	-2.39346	2	-4.84403	2	-1.83203	11	-4.84403	2	-2.12347	1	-2.42325	20	-1.94795	1
-1.49223	2	-2.04392	3	-2.4033	5	-4.70447	2	-0.42631	6	-0.65884	2	-4.80946	2	-1.82683	11	-4.80946	2	-1.9849	1	-2.41666	20	-1.87017	1
-1.48629	2	-2.04019	3	-2.3945	5	-4.69484	2	-0.41652	6	-0.461085	2	-4.78018	2	-1.16332	11	-4.78018	2	-1.94795	1	-4.48754	21	-1.7914	1
-0.936767	2	-2.03163	3	-2.3854	5	-3.6357	2	-0.548616	7	-0.394525	2	-4.73192	2	-1.15963	11	-4.73192	2	-1.87017	1	-4.48541	21	-1.78432	1
-0.933162	2	-4.31774	4	-2.26871	5	-3.62505	2	-0.542718	7	-4.81883	3	-4.6949	2	-1.15594	11	-4.6949	2	-1.83392	1	-1.49438	21	-1.76076	1
-0.929394	2	-4.31192	4	-1.94475	5	-3.61927	2	-0.537189	7	-4.69964	3	-4.68548	2	-1.14886	11	-4.68548	2	-1.829	1	-1.48868	21	-1.71325	1
-0.925134	2	-3.89216	4	-1.28026	5	-2.83313	2	-0.528669	7	-4.21749	3	-4.51438	2	-1.2103	12	-4.51438	2	-1.7914	1	-1.47341	21	-1.49915	1
-0.907931	2	-3.8868	4	-4.96654	6	-2.82522	2	-3.17342	8	-4.00393	3	-4.49059	2	-1.20682	12	-4.49059	2	-1.78432	1	-4.49483	30	-1.41768	1
-4.00025	3	-3.8766	4	-4.95876	6	-2.39346	2	-3.17002	8	-3.97825	3	-4.48153	2	-1.20301	12	-4.48153	2	-1.76076	1	-4.48954	30	-1.25888	1
-3.99726	3	-1.25478	4	-3.89495	6	-0.65884	2	-3.16654	8	-3.91328	3	-4.40994	2	-1.19854	12	-4.40994	2	-1.71325	1	-4.47935	30	-1.22828	1
-3.99432	3	-1.25097	4	-3.56522	6	-0.461085	2	-3.16003	8	-3.49991	3	-4.37328	2	-1.19002	12	-4.37328	2	-1.49915	1			-0.421983	1
-3.36132	3	-1.24487	4	-3.52405	6	-0.394525	2	-2.82489	8	-3.40685	3	-4.22353	2	-2.68081	13	-4.22353	2	-1.41768	1	0.25947	1	-0.326464	1
-2.78652	3	-0.569109	4	-2.53573	6	-4.81883	3	-2.82006	8	-3.34361	3	-4.008	2	-2.67777	13	-4.008	2	-1.25888	1	0.262788	1	-0.26654	1
-2.77649	3	-0.565914	4	-2.45385	6	-4.69964	3	-2.81473	8	-2.12378	3	-3.5816	2	-2.65922	13	-3.5816	2	-1.22828	1	1.53845	2	-0.256668	1
-2.04748	3	-0.55764	4	-1.8938	6	-4.21749	3	-1.99869	8	-1.98247	3	-3.55231	2	-4.56628	14	-3.55231	2	-0.421983	1	1.54082	2	-0.231724	1
-2.04392	3	-3.40936	5	-1.88434	6	-4.00393	3	-1.995	8	-0.773446	3	-3.48063	2	-4.56305	14	-3.48063	2	-0.326464	1	7.37887	3	-0.147346	1
-2.04019	3	-3.4056	5	-1.87365	6	-3.97825	3	-1.9909	8	-0.748338	3	-3.44619	2	-4.55956	14	-3.44619	2	-0.26654	1	7.38096	3	-4.91101	2
-2.03163	3	-3.39417	5	-1.44393	6	-3.91328	3	-4.33104	9	-0.656464	3	-3.34334	2	-4.55453	14	-3.34334	2	-0.256668	1	7.86801	7	-4.8365	2
-1.11462	3	-0.677161	6	-0.411658	6	-3.49991	3	-4.32633	9	-0.551893	3	-3.27231	2	-4.54773	14	-3.27231	2	-0.231724	1	7.87248	7	-4.7769	2
-0.746916	3	-0.67241	6	-4.99161	7	-3.40685	3	-4.31625	9	-0.478288	3	-3.25408	2	-2.76907	14	-3.25408	2	-0.147346	1	7.8794	7	-4.6752	2
-4.32458	4	-0.667454	6	-4.18261	7	-3.34361	3	-4.86935	10	-0.27361	3	-3.05768	2	-2.7651	14	-3.05768	2	-4.91101	2	5.66592	8	-4.56166	2
-4.31774	4	-0.661719	6	-2.03941	7	-2.12378	3	-4.86399	10	-0.199636	3	-2.98702	2	-2.76047	14	-2.98702	2	-4.8365	2	5.66887	8	-4.32724	2
-4.31192	4	-4.8485	7	-1.3195	7	-1.98247	3	-2.01275	10	-4.54657	4	-2.9697	2	-2.75367	14	-2.9697	2	-4.7769	2	5.67194	8	-4.04941	2
-3.89216	4	-4.84457	7	-1.28714	7	-0.773446	3	-2.00788	10	-4.26775	4	-2.94926	2	-1.0891	14	-2.94926	2	-4.6752	2	5.68255	8	-3.98457	2
-3.8868	4	-4.841	7	-0.340469	7	-0.748338	3	-2.00284	10	-3.35627	4	-2.93341	2	-1.08406	14	-2.93341	2	-4.56166	2	0.23645	9	-3.66766	2
-3.8766	4	-4.83494	7	-0.316262	7	-0.656464	3	-1.996	10	-3.33898	4	-2.9246	2	-0.162333	15	-2.9246	2	-4.32724	2	0.239891	9	-3.41953	2
-2.62375	4	-4.17618	7	-3.84371	8	-0.551893	3	-2.71444	11	-2.6513	4	-2.69244	2	-0.15881	15	-2.69244	2	-4.04941	2	0.250581	9	-2.59049	2
-2.4928	4	-4.17225	7	-3.83572	8	-0.478288	3	-2.71153	11	-2.3491	4	-2.61326	2	-0.155001	15	-2.61326	2	-3.98457	2	7.63634	9	-2.49473	2
-1.25478	4	-4.16442	7	-3.82896	8	-0.27361	3	-2.70834	11	-1.97313	4	-1.41596	2	-0.150086	15	-1.41596	2	-3.66766	2	7.6406	9	-2.40884	2
-1.25097	4	-3.09672	7	-1.97179	8	-0.199636	3	-2.69707	11	-1.43753	4	-1.01393	2	-0.135955	15	-1.01393	2	-3.41953	2	7.65281	9	-2.34797	2
-1.24487	4	-3.09303	7	-1.35513	8	-4.54657	4	-0.216489	12	-0.668425	4	-0.993618	2	-3.44356	16	-0.993618	2	-2.59049	2	3.87764	11	-2.10901	2
-0.569109	4	-3.08922	7	-4.66168	9	-4.26775	4	-0.211983	12	-0.638196	4	-0.94635	2	-3.44094	16	-0.94635	2	-2.49473	2	3.88059	11	-1.82614	2
-0.565914	4	-3.07943	7	-3.31749	9	-3.35627	4	-0.206741	12	-0.632052	4	-0.918252	2	-3.43464	16	-0.918252	2	-2.40884	2	6.52452	14	-1.68011	2
-0.55764	4	-2.32351	7	-3.29259	9	-3.33898	4	-4.20252	13	-0.297777	4	-0.826829	2	-2.7318	16	-0.826829	2	-2.34797	2	6.52882	14	-1.6446	2
-0.282019	4	-2.31823	7	-3.28448	9	-2.75088	4	-4.19658	13	-0.197056	4	-0.326788	2	-2.72857	16	-0.326788	2	-2.10901	2	6.53456	14	-1.61867	2
-4.20932	5	-2.31245	7	-1.32728	9	-2.74744	4	-1.06305	14	-4.92991	5	-0.283206	2	-2.56067	16	-0.283206	2	-1.82614	2	6.545	14	-1.58472	2
-3.99382	5	-1.81962	7	-0.135095	9	-2.74379	4	-1.05937	14	-4.8475	5	-4.93722	3	-2.55752	16	-4.93722	3	-1.68011	2	9.28618	16	-1.56805	2
-3.41596	5	-1.81638	7	-0.1276	9	-2.73888	4	-1.04483	14	-4.07155	5	-4.81655	3	-2.54822	16	-4.81655	3	-1.6446	2	9.28859	16	-1.54118	2
-3.40936	5	-1.8127	7	-0.121456	9	-2.72978	4	-2.66881	15	-4.06348	5	-4.63972	3	-1.04769	16	-4.63972	3	-1.61867	2	8.58265	17	-1.53102	2
-3.4056	5	-4.91043	8	-4.22902	10	-2.6513	4	-2.6648	15	-4.02384	5	-4.58738	3	-1.044	16	-4.58738	3	-1.58472	2	8.58797	17	-1.51758	2
-3.39417	5	-4.90642	8	-4.22144	10	-2.3491	4	-2.65144	15	-3.82203	5	-4.57238	3	-1.04019	16	-4.57238	3	-1.56805	2	8.59334	17	-1.08881	2
-3.22988	5	-4.8947	8	-4.20256	10	-1.97313	4	-0.660579	15	-2.84799	5	-4.54056	3	-1.03532	16	-4.54056	3	-1.54118	2	1.04037	18	-1.03098	2
-2.4033	5	-2.54515	8	-4.14714	10	-1.43753	4	-0.657425	15	-2.75981	5	-4.49018	3	-1.02417	16	-4.49018	3	-1.53102	2	1.04562	18	-0.935541	2
-2.3945	5	-2.53917	8	-3.61904	10	-0.668425	4	-0.653984	15	-2.09015	5	-4.44422	3	-3.59127	17	-4.44422	3	-1.51758	2	2.56397	18	-0.871439	2
-2.3854	5	-1.71386	8	-1.8639	10	-0.638196	4	-0.649806	15	-4.8423	6	-4.18179	3	-3.58688	17	-4.18179	3	-1.08881	2	2.56921	18	-0.638949	2
-2.26871	5	-1.71026	8	-1.83162	10	-0.632052	4	-0.644276	15	-3.3493	6	-4.09585	3	-3.58172	17	-4.09585	3	-1.03098	2	2.57691	18	-4.76756	3
-1.94475	5	-1.70657	8	-1.81983	10	-0.39305	4	-0.636945	15	-3.32997	6	-4.08529	3	-1.17184	17	-4.08529	3	-0.935541	2	4.29777	18	-4.69171	3
-1.28026	5	-0.152176	8	-1.56677	10	-0.387152	4	-2.7726	16	-3.29593	6	-3.24364	3	-1.16848	17	-3.24364	3	-0.871439	2	4.29965	18	-4.40871	3
-4.96654	6	-0.146769	8	-1.24409	10	-0.297777	4	-2.76839	16	-3.09208	6	-2.77641	3	-1.165	17	-2.77641	3	-0.638949	2	4.31042	18	-4.38242	3
-4.95876	6	-0.141158	8	-0.551045	10	-0.197056	4	-2.76445	16	-2.98783	6	-2.49063	3	-1.16069	17	-2.49063	3	-4.76756	3	0.179516	19	-4.30639	3
-3.89495	6	-4.65553	9	-4.92929	11	-4.99951	5	-2.75937	16	-2.20001	6	-2.40756	3	-0.408667	17	-2.40756	3	-4.69171	3	0.181482	19	-4.28137	3
-3.56522	6	-4.64968	9	-4.78314	11	-4.99266	5	-1.54802	16	-2.19337	6	-2.35661	3	-0.404776	17	-2.35661	3	-4.40871	3	0.195162	19	-4.25478	3
-3.52405	6	-0.544451	10	-4.69524	11	-4.92991	5	-1.54466	16	-2.17727	6	-2.31466	3	-0.400844	17	-2.31466	3	-4.38242	3	0.117912	20	-3.81307	3
-2.53573	6	-0.540109	10	-4.54189	11	-4.8475	5	-1.53696	16	-2.01646	6	-2.30127	3	-0.395928	17	-2.30127	3	-4.30639	3	0.123523	20	-3.17491	3
-2.45385	6	-1.00687	11	-4.49282	11	-4.07155	5	-0.752862	16	-4.9157	7	-2.26981	3	-4.51176	18	-2.26981	3	-4.28137	3	0.255151	24	-2.95274	3
-1.8938	6	-1.00302	11	-4.25853	11	-4.06348	5	-0.749093	16	-4.90587	7	-2.25179	3	-4.508	18	-2.25179	3	-4.25478	3	0.260885	24	-2.82556	3
-1.88434	6	-0.998757	11	-4.20864	11	-4.02384	5	-0.742171	16	-4.06791	7	-2.0295	3	-4.50402	18	-2.0295	3	-3.81307	3	0.266251	24	-2.78727	3
-1.87365	6	-4.86605	12	-4.15244	11	-3.82203	5	-0.236314	16	-3.81305	7	-1.94066	3	-2.67323	18	-1.94066	3	-3.17491	3	0.283331	24	-2.64706	3
-1.44393	6	-4.86322	12	-3.9093	11	-2.84799	5	-0.230538	16	-1.1187	7	-1.25318	3	-2.66811	18	-1.25318	3	-2.95274	3	0.30291	24	-2.63121	3
-0.677161	6	-4.85163	12	-3.44653	11	-2.75981	5	-3.7783	17	-0.233551	7	-1.15885	3	-2.66049	18	-1.15885	3	-2.82556	3	0.308645	24	-2.50898	3
-0.67241	6	-4.46284	12	-3.26721	11	-2.09015	5	-3.77535	17	-0.200169	7	-0.385975	3	-1.0823	18	-0.385975	3	-2.78727	3	7.35116	25	-2.04597	3
-0.667454	6	-4.45726	12	-3.10902	11	-0.668261	5	-3.77248	17	-4.62738	8	-0.31368	3	-1.07865	18	-0.31368	3	-2.64706	3	7.35645	25	-1.65898	3
-0.661719	6	-4.45022	12	-3.0303	11	-0.665435	5	-3.76875	17	-4.5897	8	-0.305898	3	-1.07509	18	-0.305898	3	-2.63121	3	9.72378	26	-1.50833	3
-0.411658	6	-0.213142	12	-2.9784	11	-4.90476	6	-3.75798	17	-3.40481	8	-0.292504	3	-1.06538	18	-0.292504	3	-2.50898	3	9.72816	26	-1.36144	3
-4.99161	7	-0.21003	12	-2.96804	11	-4.90079	6	-1.94042	17	-1.96997	8	-0.205628	3	-0.473794	18	-0.205628	3	-2.04597	3	9.73422	26	-1.29587	3
-4.8485	7	-0.192048	12	-2.92331	11	-4.8423	6	-1.93755	17	-1.36888	8	-0.137716	3	-0.469575	18	-0.137716	3	-1.65898	3	5.51115	27	-0.818805	3
-4.84457	7	-4.85626	13	-2.85675	11	-3.3493	6	-0.392945	17	-0.622017	8	-4.46392	4	-0.464414	18	-4.46392	4	-1.50833	3	5.51689	27	-0.738605	3
-4.841	7	-4.85052	13	-2.82623	11	-3.32997	6	-0.387948	17	-3.76722	9	-4.43087	4	-0.457123	18	-4.43087	4	-1.36144	3	9.38237	27	-0.514512	3
-4.83494	7	-1.93207	13	-2.81587	11	-3.29593	6	-4.46143	18	-3.75305	9	-4.29185	4	-2.25003	19	-4.29185	4	-1.29587	3	9.38757	27	-0.180196	3
-4.18261	7	-1.92704	13	-2.53558	11	-3.09208	6	-4.45836	18	-2.95015	9	-3.73684	4	-2.24634	19	-3.73684	4	-0.818805	3	9.39638	27	-0.0842264	3
-4.17618	7	-1.91487	13	-0.671937	11	-2.98783	6	-4.45185	18	-2.34664	9	-3.69494	4	-2.24257	19	-3.69494	4	-0.738605	3	6.11388	28	-4.87467	4
-4.17225	7	-1.15334	13	-0.61918	11	-2.20001	6	-2.60463	18	-1.5754	9	-3.66381	4	-2.23663	19	-3.66381	4	-0.514512	3	6.11732	28	-4.83584	4
-4.16442	7	-1.14945	13	-0.542544	11	-2.19337	6	-2.60102	18	-0.665721	9	-3.49333	4	-1.29431	20	-3.49333	4	-0.180196	3	6.12477	28	-3.19445	4
-3.09672	7	-0.50187	13	-4.79949	12	-2.17727	6	-2.5968	18	-0.659291	9	-3.38757	4	-1.29082	20	-3.38757	4	-0.0842264	3	8.18069	28	-2.94562	4
-3.09303	7	-0.496586	13	-4.03697	12	-2.01646	6	-1.65292	18	-0.172889	9	-3.35341	4	-1.28726	20	-3.35341	4	-4.87467	4	8.18433	28	-2.83601	4
-3.08922	7	-4.20393	14	-4.02985	12	-0.439499	6	-1.64915	18	-4.82131	10	-2.21792	4	-1.27522	20	-2.21792	4	-4.83584	4	8.18814	28	-2.72079	4
-3.07943	7	-4.19987	14	-4.01653	12	-0.435935	6	-0.845391	18	-4.76818	10	-1.94922	4	-0.199484	20	-1.94922	4	-3.19445	4	8.19662	28	-2.48461	4
-2.32351	7	-4.19483	14	-4.00363	12	-0.431962	6	-0.84023	18	-4.44423	10	-1.86078	4	-0.196535	20	-1.86078	4	-2.94562	4	6.37717	29	-2.20698	4
-2.31823	7	-3.59202	14	-2.99876	12	-0.42631	6	-0.833717	18	-4.43685	10	-1.82912	4	-0.189653	20	-1.82912	4	-2.83601	4	6.38282	29	-2.12404	4
-2.31245	7	-3.5878	14	-2.98516	12	-0.41652	6	-4.27445	19	-3.6625	10	-1.77395	4	-0.184042	20	-1.77395	4	-2.72079	4	6.39204	29	-1.11159	4
-2.03941	7	-3.58346	14	-2.95239	12	-4.9157	7	-4.27158	19	-3.65575	10	-1.684	4	-4.84638	21	-1.684	4	-2.48461	4	7.0114	29	-0.407238	4
-1.81962	7	-1.33746	14	-2.7029	12	-4.90587	7	-3.7792	19	-3.51361	10	-1.59045	4	-4.84294	21	-1.59045	4	-2.20698	4	7.01705	29	-3.57718	5
-1.81638	7	-1.33303	14	-2.53374	12	-4.06791	7	-3.77478	19	-2.89704	10	-1.49382	4	-4.8393	21	-1.49382	4	-2.12404	4	7.02311	29	-2.67094	5
-1.8127	7	-1.32832	14	-2.22965	12	-3.81305	7	-3.76925	19	-2.8091	10	-1.23504	4	-4.82472	21	-1.23504	4	-1.11159	4	5.58021	30	-2.40777	5
-1.3195	7	-3.3844	15	-1.58596	12	-1.1187	7	-3.75503	19	-2.74168	10	-0.31282	4	-2.69078	21	-0.31282	4	-0.407238	4	5.58406	30	-1.50644	5
-1.28714	7	-3.38067	15	-4.96775	13	-0.548616	7	-1.68896	19	-1.4319	10	-0.222012	4	-2.68746	21	-0.222012	4	-3.57718	5	5.58828	30	-0.133952	5
-0.340469	7	-3.37207	15	-4.88239	13	-0.542718	7	-1.68442	19	-0.920593	10	-0.0615301	4	-2.68398	21	-0.0615301	4	-2.67094	5	5.59442	30	-3.52123	6
-0.316262	7	-2.85884	15	-4.61041	13	-0.537189	7	-1.67881	19	-0.905438	10	-4.84825	5	-2.67857	21	-4.84825	5	-2.40777	5	8.69744	30	-3.01476	6
-4.91043	8	-2.85437	15	-3.53173	13	-0.528669	7	-1.66889	19	-0.0687869	10	-4.83662	5	-2.67292	21	-4.83662	5	-1.50644	5	8.70092	30	-1.58992	6
-4.90642	8	-2.84516	15	-2.5579	13	-0.233551	7	-0.692609	19	-4.78583	11	-4.80823	5	-1.68144	21	-4.80823	5	-0.133952	5	8.70452	30	-1.40978	6
-4.8947	8	-0.97926	15	-2.55061	13	-0.200169	7	-0.688513	19	-4.63223	11	-4.3641	5	-1.67738	21	-4.3641	5	-3.52123	6	8.70887	30	-1.34719	6
-3.84371	8	-0.975246	15	-2.51813	13	-4.62738	8	-0.684335	19	-4.06604	11	-4.17888	5	-1.67267	21	-3.96237	5	-3.01476	6	8.71681	30	-1.33675	6
-3.83572	8	-0.971109	15	-2.01465	13	-4.5897	8	-0.15636	19	-4.05838	11	-4.17749	5	-1.66219	21	-2.13681	5	-1.58992	6			-1.29554	6
-3.82896	8	-0.964965	15	-1.76619	13	-3.40481	8	-0.150953	19	-4.05236	11	-3.96237	5	-3.5117	22	-2.03601	5	-1.40978	6			-0.967613	6
-2.54515	8	-0.272207	15	-1.1594	13	-3.17342	8	-0.145915	19	-3.94718	11	-2.13681	5	-3.50859	22	-1.91973	5	-1.34719	6			-4.18757	7
-2.53917	8	-0.26635	15	-0.86236	13	-3.17002	8	-4.71977	20	-3.75585	11	-2.03601	5	-3.49052	22	-1.89851	5	-1.33675	6			-3.56633	7
-1.97179	8	-0.259223	15	-0.427323	13	-3.16654	8	-4.71616	20	-3.48982	11	-1.91973	5	-2.24218	22	-1.88598	5	-1.29554	6			-0.479287	7
-1.71386	8	-4.99335	16	-0.0595831	13	-3.16003	8	-4.71239	20	-3.32389	11	-1.89851	5	-2.23911	22	-1.51217	5	-0.967613	6			-0.0394161	7
-1.71026	8	-0.78814	16	-4.21052	14	-2.82489	8	-4.70277	20	-3.2697	11	-1.88598	5	-1.54332	22	-0.580822	5	-4.18757	7			-4.39397	8
-1.70657	8	-0.784249	16	-4.11054	14	-2.82006	8	-4.64915	21	-2.08509	11	-1.51217	5	-1.54033	22	-4.96601	6	-3.56633	7			-4.21948	8
-1.35513	8	-0.779088	16	-3.55831	14	-2.81473	8	-4.64608	21	-1.8902	11	-0.580822	5	-1.53673	22	-3.49919	6	-0.479287	7			-4.05551	8
-0.152176	8	-4.96931	17	-3.3352	14	-1.99869	8	-4.64292	21	-1.84596	11	-4.96601	6	-1.53161	22	-3.35198	6	-0.0394161	7			-4.00415	8
-0.146769	8	-4.96664	17	-1.85097	14	-1.995	8	-4.63248	21	-1.81545	11	-3.53843	6	-1.15387	22	-3.28857	6	-4.39397	8			-1.73308	8
-0.141158	8	-4.96374	17	-1.83066	14	-1.9909	8	-2.43149	21	-1.22026	11	-3.53376	6	-1.15043	22	-2.73143	6	-4.21948	8			-1.60548	8
-4.66168	9	-4.95534	17	-0.764425	14	-1.96997	8	-2.42858	21	-1.20477	11	-3.52426	6	-1.1424	22	-2.68068	6	-4.05551	8			-0.855833	8
-4.65553	9	-4.58817	17	-0.758321	14	-1.36888	8	-2.42543	21	-1.07264	11	-3.49919	6	-0.675171	22	-2.38106	6	-4.00415	8			-0.617117	8
-4.64968	9	-4.58494	17	-0.751645	14	-0.622017	8	-2.41711	21	-4.91969	12	-3.35198	6	-0.670666	22	-2.26105	6	-3.04568	8			-0.394663	8
-3.31749	9	-4.58137	17	-0.667308	14	-4.33104	9	-2.41228	21	-4.71092	12	-3.28857	6	-0.665095	22	-1.95516	6	-3.04343	8			-0.0082864	8
-3.29259	9	-4.57691	17	-0.227765	14	-4.32633	9	-1.93374	21	-4.65005	12	-2.73143	6	-0.656535	22	-1.87307	6	-1.73308	8			-3.22537	9
-3.28448	9	-4.02628	17	-4.69995	16	-4.31625	9	-1.92833	21	-4.43739	12	-2.68068	6	-3.64998	23	-1.32839	6	-1.60548	8			-2.9874	9
-1.32728	9	-4.02149	17	-4.22322	16	-3.76722	9	-1.89426	22	-4.42911	12	-2.38106	6	-3.64621	23	-1.12842	6	-0.855833	8			-3.91764	10
-0.135095	9	-4.01445	17	-4.21621	16	-3.75305	9	-1.89094	22	-4.24926	12	-2.26105	6	-3.63892	23	-1.05096	6	-0.617117	8			-3.47839	10
-0.1276	9	-3.05635	17	-4.20307	16	-2.95015	9	-1.88758	22	-2.56133	12	-1.95516	6	-0.370387	23	-0.994642	6	-0.394663	8			-3.29878	10
-0.121456	9	-3.05282	17	-4.14503	16	-2.34664	9	-1.88332	22	-2.01779	12	-1.87307	6	-0.367151	23	-0.950733	6	-0.0082864	8			-3.12392	10
-4.22902	10	-3.04914	17	-3.48889	16	-1.5754	9	-1.87361	22	-1.99944	12	-1.32839	6	-0.363752	23	-0.853084	6	-3.22537	9			-2.06174	10
-4.22144	10	-2.02288	17	-2.26766	16	-0.665721	9	-0.350551	22	-1.53901	12	-1.12842	6	-0.359615	23	-0.611665	6	-2.9874	9			-0.497637	10
-4.20256	10	-2.01973	17	-2.11586	16	-0.659291	9	-0.346701	22	-1.48621	12	-1.05096	6	-0.354741	23	-4.08705	7	-0.287839	9			-0.27039	10
-4.14714	10	-2.01653	17	-4.10976	17	-0.172889	9	-0.3424	22	-1.39094	12	-0.994642	6	-0.346344	23	-4.07963	7	-0.283334	9			-4.85256	11
-3.61904	10	-2.00642	17	-0.653791	17	-4.86935	10	-0.332693	22	-1.3417	12	-0.950733	6	-4.99069	24	-4.06567	7	-0.27764	9			-4.67323	11
-1.8639	10	-2.0015	17	-4.98004	18	-4.86399	10	-4.9625	23	-4.00407	13	-0.853084	6	-3.25193	24	-3.95598	7	-0.271127	9			-4.52578	11
-1.83162	10	-0.0778103	17	-4.65473	18	-4.82131	10	-4.95934	23	-3.93194	13	-0.611665	6	-3.24611	24	-3.04457	7	-3.91764	10			-4.49362	11
-1.81983	10	-0.0741239	17	-4.3139	18	-4.76818	10	-4.95598	23	-3.52734	13	-4.08705	7	-3.23866	24	-3.01643	7	-3.47839	10			-4.26212	11
-1.56677	10	-0.0704375	17	-2.3044	18	-4.44423	10	-4.95172	23	-3.39987	13	-4.07963	7	-2.74423	24	-2.10482	7	-3.29878	10			-4.23095	11
-1.24409	10	-0.0646621	17	-1.87747	18	-4.43685	10	-4.52209	23	-3.31897	13	-4.06567	7	-2.7396	24	-0.920709	7	-3.12392	10			-4.21624	11
-0.551045	10	-4.48528	18	-4.64199	19	-3.6625	10	-4.51648	23	-3.29661	13	-3.95598	7	-2.7326	24	-0.865864	7	-2.24512	10			-4.19715	11
-0.544451	10	-4.48069	18	-3.61754	19	-3.65575	10	-4.50391	23	-3.11036	13	-3.04457	7	-0.797601	24	-0.787015	7	-2.24102	10			-3.75343	11
-0.540109	10	-4.04041	18	-2.78708	19	-3.51361	10	-4.37152	23	-1.9251	13	-3.01643	7	-0.792809	24	-0.327607	7	-2.06174	10			-3.71006	11
-4.92929	11	-4.03611	18	-2.77045	19	-2.89704	10	-4.36698	23	-1.91531	13	-2.10482	7	-3.34778	25	-0.168805	7	-0.497637	10			-3.65283	11
-4.78314	11	-4.02915	18	-1.61742	19	-2.8091	10	-3.59971	23	-1.9088	13	-0.956959	7	-3.34393	25	-0.0608338	7	-0.27039	10			-3.52139	11
-4.69524	11	-2.61087	18	-4.22228	20	-2.74168	10	-3.59553	23	-1.78485	13	-0.951265	7	-3.33987	25	-4.93844	8	-4.85256	11			-3.49657	11
-4.54189	11	-2.608	18	-3.89664	20	-2.01275	10	-3.59091	23	-1.77445	13	-0.920709	7	-3.32005	25	-4.86971	8	-4.67323	11			-3.48412	11
-4.49282	11	-2.60501	18	-1.89673	20	-2.00788	10	-3.58398	23	-0.621748	13	-0.865864	7	-2.77671	25	-4.55723	8	-4.52578	11			-3.45786	11
-4.25853	11	-2.28634	18	-0.125119	20	-2.00284	10	-4.55789	24	-0.6154	13	-0.787015	7	-2.77139	25	-3.8265	8	-4.49362	11			-3.44296	11
-4.20864	11	-2.28269	18	-3.8563	21	-1.996	10	-4.5538	24	-0.606102	13	-0.327607	7	-2.76377	25	-3.82015	8	-4.26212	11			-3.43419	11
-4.15244	11	-2.27032	18	-2.91037	21	-1.4319	10	-3.71256	24	-0.558834	13	-0.23815	7	-0.868421	26	-2.44602	8	-4.23095	11			-3.2058	11
-3.9093	11	-1.90119	18	-1.86957	21	-0.920593	10	-3.70871	24	-0.104504	13	-0.233849	7	-0.86539	26	-2.33465	8	-4.21624	11			-3.13416	11
-3.44653	11	-1.89636	18	-1.68455	21	-0.905438	10	-3.70453	24	-0.0575639	13	-0.22918	7	-0.862154	26	-2.0798	8	-4.19715	11			-3.05072	11
-3.26721	11	-1.88984	18	-1.61164	21	-0.0687869	10	-3.69761	24	-4.90998	14	-0.21726	7	-0.857854	26	-2.06268	8	-3.75343	11			-2.72017	11
-3.10902	11	-0.285847	18	-1.59833	21	-4.78583	11	-2.53016	24	-4.79939	14	-0.168805	7	-2.8728	27	-1.77866	8	-3.71006	11			-2.69932	11
-3.0303	11	-0.280809	18	-1.49257	21	-4.63223	11	-2.52578	24	-4.66611	14	-0.0608338	7	-2.8685	27	-1.50779	8	-3.65283	11			-2.68695	11
-2.9784	11	-0.275074	18	-1.37997	21	-4.06604	11	-2.52148	24	-4.57993	14	-4.93844	8	-2.86207	27	-1.46548	8	-3.52139	11			-2.58017	11
-2.96804	11	-3.88223	19	-1.21294	21	-4.05838	11	-2.51566	24	-4.56694	14	-4.86971	8	-1.78105	27	-0.906046	8	-3.49657	11			-2.51357	11
-2.92331	11	-3.8787	19	-0.434696	21	-4.05236	11	-1.1374	24	-4.55818	14	-4.55723	8	-1.77724	27	-0.814254	8	-3.48412	11			-2.48338	11
-2.85675	11	-3.87493	19	-0.428142	21	-3.94718	11	-1.13379	24	-4.41846	14	-3.8265	8	-1.77311	27	-0.153035	8	-3.45786	11			-2.45262	11
-2.82623	11	-3.87002	19	-0.14138	21	-3.75585	11	-1.12371	24	-3.99588	14	-3.82015	8	-1.76688	27	-0.101958	8	-3.44296	11			-2.29607	11
-2.81587	11	-1.32398	19	-2.55205	22	-3.48982	11	-4.32622	25	-3.9353	14	-2.7966	8	-4.4902	28	-4.98866	9	-3.43419	11			-2.09123	11
-2.53558	11	-1.31829	19	-2.53796	22	-3.32389	11	-4.32278	25	-3.81438	14	-2.79222	8	-4.48618	28	-4.80106	9	-3.2058	11			-1.85063	11
-1.00687	11	-4.82546	20	-1.7129	22	-3.2697	11	-4.30791	25	-3.46008	14	-2.78788	8	-4.48159	28	-4.38786	9	-3.13416	11			-1.71411	11
-1.00302	11	-4.82193	20	-1.67988	22	-2.71444	11	-0.890938	25	-2.6088	14	-2.77239	8	-1.01948	28	-3.43345	9	-3.05072	11			-1.29435	11
-0.998757	11	-4.81861	20	-1.54213	22	-2.71153	11	-0.887661	25	-1.9813	14	-2.44602	8	-1.01522	28	-3.30004	9	-2.72017	11			-0.829496	11
-0.671937	11	-4.81419	20	-4.59755	23	-2.70834	11	-0.880248	25	-1.81823	14	-2.33465	8	-1.01063	28	-2.93517	9	-2.69932	11			-0.778336	11
-0.61918	11	-4.80862	20	-4.37059	23	-2.69707	11	-3.43952	26	-0.6009	14	-2.0798	8	-1.0015	28	-2.03577	9	-2.68695	11			-0.742291	11
-0.542544	11	-4.80186	20	-4.36293	23	-2.08509	11	-3.43632	26	-4.94734	15	-2.06268	8	-0.99593	28	-1.24294	9	-2.58017	11			-0.689002	11
-4.86605	12	-4.21605	20	-3.61984	23	-1.8902	11	-3.43296	26	-4.80435	15	-1.77866	8	-4.16886	29	-0.857467	9	-2.51357	11			-0.664099	11
-4.86322	12	-4.21195	20	-3.33119	23	-1.84596	11	-3.42887	26	-4.24197	15	-1.50779	8	-4.16329	29	-0.766208	9	-2.48338	11			-0.500381	11
-4.85163	12	-4.1986	20	-2.95948	23	-1.81545	11	-3.42301	26	-4.1378	15	-1.46548	8	-4.15699	29	-4.75433	10	-2.45262	11			-0.224679	11
-4.79949	12	-3.82967	20	-2.93691	23	-1.22026	11	-2.77404	26	-2.94865	15	-0.906046	8	-2.55569	29	-4.56919	10	-2.29607	11			-0.210588	11
-4.46284	12	-3.82591	20	-1.10124	23	-1.20477	11	-2.77027	26	-2.93526	15	-0.814254	8	-2.55229	29	-4.53507	10	-2.09123	11			-0.19019	11
-4.45726	12	-3.82156	20	-4.87768	24	-1.07264	11	-2.76576	26	-2.92895	15	-0.153035	8	-2.54889	29	-4.42136	10	-1.85063	11			-0.179541	11
-4.45022	12	-2.57335	20	-3.97754	24	-4.91969	12	-2.75917	26	-2.64231	15	-0.101958	8	-2.54451	29	-4.39871	10	-1.71411	11			-0.158528	11
-4.03697	12	-2.56904	20	-3.56175	24	-4.71092	12	-1.15112	26	-1.70355	15	-4.98866	9	-2.53882	29	-4.32679	10	-1.29435	11			-0.148943	11
-4.02985	12	-2.56491	20	-4.93457	25	-4.65005	12	-1.14723	26	-1.69576	15	-4.80106	9	-1.1655	29	-4.19772	10	-0.829496	11			-0.138212	11
-4.01653	12	-0.53259	20	-4.47885	25	-4.43739	12	-1.14256	26	-1.68782	15	-4.38786	9	-1.16129	29	-4.02323	10	-0.778336	11			-0.111465	11
-4.00363	12	-0.529273	20	-3.67161	25	-4.42911	12	-1.13297	26	-0.60303	15	-3.43345	9	-1.1524	29	-2.93836	10	-0.742291	11			-4.83761	12
-2.99876	12	-4.33316	21	-2.67972	25	-4.24926	12	-3.81463	27	-0.559366	15	-3.30004	9	-0.453332	29	-2.66446	10	-0.689002	11			-4.78276	12
-2.98516	12	-4.32976	21	-2.57879	25	-2.56133	12	-3.81172	27	-4.77994	16	-3.08709	9	-0.449932	29	-2.51107	10	-0.664099	11			-4.65308	12
-2.95239	12	-1.89214	21	-2.04955	25	-2.01779	12	-3.80861	27	-4.76871	16	-3.08344	9	-0.435801	29	-2.32781	10	-0.500381	11			-4.53426	12
-2.7029	12	-1.88636	21	-1.80612	25	-1.99944	12	-3.7921	27	-4.75958	16	-2.93517	9	-2.42355	30	-2.15627	10	-0.224679	11			-4.29226	12
-2.53374	12	-1.87842	21	-1.41811	25	-1.53901	12	-3.36583	27	-4.40327	16	-2.03577	9	-2.41974	30	-2.022	10	-0.210588	11			-3.66291	12
-2.22965	12	-4.56876	22	-1.4052	25	-1.48621	12	-3.36145	27	-4.39573	16	-1.24294	9	-2.41569	30	-2.00275	10	-0.19019	11			-2.54843	12
-1.58596	12	-4.56495	22	-0.703107	25	-1.39094	12	-3.35665	27	-4.38811	16	-0.857467	9			-1.86255	10	-0.179541	11			-1.56588	12
-0.213142	12	-4.56057	22	-0.697004	25	-1.3417	12	-3.34912	27	-4.29399	16	-0.766208	9	1.10809	2	-1.33703	10	-0.158528	11			-1.39171	12
-0.21003	12	-3.21032	22	-3.42577	26	-0.216489	12	-2.88164	27	-3.78178	16	-4.75433	10	1.11005	2	-1.14927	10	-0.148943	11			-1.327	12
-0.192048	12	-3.20655	22	-2.3572	26	-0.211983	12	-2.8782	27	-3.76871	16	-4.56919	10	1.11828	2	-0.986614	10	-0.138212	11			-1.02811	12
-4.96775	13	-3.2029	22	-1.79064	26	-0.206741	12	-2.87439	27	-3.70826	16	-4.53507	10	0.275981	4	-0.967486	10	-0.111465	11			-0.499644	12
-4.88239	13	-0.539349	22	-4.59067	27	-4.20252	13	-2.86583	27	-3.01951	16	-4.42136	10	0.276882	4	-0.0921682	10	-4.83761	12			-0.0101706	12
-4.85626	13	-0.536154	22	-3.46992	27	-4.19658	13	-1.97773	27	-1.52467	16	-4.39871	10	6.82808	4	-3.86078	11	-4.78276	12			-2.77285	13
-4.85052	13	-0.532222	22	-3.03116	27	-4.00407	13	-1.97396	27	-1.51525	16	-4.32679	10	6.83341	4	-3.85341	11	-4.65308	12			-2.58922	13
-4.61041	13	-0.527552	22	-1.56458	27	-3.93194	13	-1.9697	27	-0.758924	16	-4.19772	10	6.8432	4	-2.66729	11	-4.53426	12			-2.07833	13
-3.53173	13	-0.521695	22	-0.733131	27	-3.52734	13	-1.96454	27	-3.4346	17	-4.02323	10	9.0285	4	-0.960277	11	-4.29226	12			-2.061	13
-2.5579	13	-4.80035	23	-0.541806	27	-3.39987	13	-1.38381	27	-3.27256	17	-3.30479	10	9.03403	4	-0.864348	11	-3.66291	12			-1.58869	13
-2.55061	13	-4.7965	23	-0.533369	27	-3.31897	13	-1.37918	27	-1.6181	17	-3.30135	10	0.188122	5	-4.80381	12	-2.54843	12			-1.33113	13
-2.51813	13	-4.7924	23	-0.239848	27	-3.29661	13	-1.37476	27	-1.59775	17	-3.28443	10	0.189351	5	-2.952	12	-1.56588	12			-0.928209	13
-2.01465	13	-4.78404	23	-4.78237	28	-3.11036	13	-4.77682	28	-0.817947	17	-2.93836	10	5.85991	5	-2.58652	12	-1.39171	12			-0.646609	13
-1.93207	13	-3.60964	23	-4.70544	28	-1.9251	13	-4.77346	28	-3.61257	18	-2.66446	10	5.86278	5	-1.9167	12	-1.327	12			-0.148821	13
-1.92704	13	-3.60456	23	-4.69193	28	-1.91531	13	-4.77011	28	-3.49743	18	-2.51107	10	5.86568	5	-1.21972	12	-1.02811	12			-4.99682	14
-1.91487	13	-0.618402	23	-3.51682	28	-1.9088	13	-1.25823	28	-3.48465	18	-2.32781	10	5.87461	5	-0.819005	12	-0.499644	12			-4.88504	14
-1.76619	13	-0.614183	23	-0.572731	28	-1.78485	13	-1.25532	28	-3.39737	18	-2.15627	10	5.8801	5	-4.72943	13	-0.0101706	12			-4.81958	14
-1.1594	13	-0.609759	23	-0.137243	28	-1.77445	13	-1.24258	28	-1.65902	18	-2.022	10	5.891	5	-4.03695	13	-2.77285	13			-4.7033	14
-1.15334	13	-0.607711	23	-0.130362	28	-0.621748	13	-0.362307	28	-0.856491	18	-2.00275	10	6.87302	5	-3.67929	13	-2.58922	13			-4.68573	14
-1.14945	13	-0.602141	23	-0.0992734	28	-0.6154	13	-0.357556	28	-2.35493	19	-1.86255	10	6.87793	5	-2.03171	13	-2.07833	13			-4.64001	14
-0.86236	13	-4.40332	24	-4.5613	29	-0.606102	13	-0.352886	28	-2.3483	19	-1.33703	10	6.89386	5	-1.68519	13	-2.061	13			-4.44455	14
-0.50187	13	-4.39857	24	-4.55098	29	-0.558834	13	-0.34707	28	-2.33957	19	-1.14927	10	0.83095	6	-1.01811	13	-1.58869	13			-4.24934	14
-0.496586	13	-4.39345	24	-3.02018	29	-0.104504	13	-4.55209	29	-0.661725	19	-0.986614	10	0.835742	6	-0.369059	13	-1.33113	13			-3.44721	14
-0.427323	13	-4.38231	24	-2.74444	29	-0.0575639	13	-4.54832	29	-0.251592	19	-0.967486	10	0.846105	6	-0.27485	13	-0.928209	13			-3.44037	14
-0.0595831	13	-3.08416	24	-2.73674	29	-4.90998	14	-4.54427	29	-4.11208	20	-0.0921682	10	3.2548	6	-3.57427	14	-0.646609	13			-2.96929	14
-4.21052	14	-3.08076	24	-2.1311	29	-4.79939	14	-0.910863	29	-4.0991	20	-3.86078	11	3.25984	6	-3.56776	14	-0.148821	13			-4.42202	15
-4.20393	14	-3.06655	24	-1.42958	29	-4.66611	14	-0.905456	29	-3.35317	20	-3.85341	11	3.26504	6	-3.54891	14	-4.99682	14			-4.35137	15
-4.19987	14	-3.06208	24	-1.34974	29	-4.57993	14	-0.899967	29	-3.31508	20	-2.66729	11	3.514	7	-2.72152	14	-4.88504	14			-4.27002	15
-4.19483	14	-2.35052	24	-1.34217	29	-4.56694	14	-0.892103	29	-2.59684	20	-1.84198	11	3.51826	7	-1.09852	14	-4.81958	14			-4.19961	15
-4.11054	14	-2.34585	24	-1.33512	29	-4.55818	14	-4.01859	30	-1.7282	20	-1.83912	11	3.52313	7	-0.586393	14	-4.7033	14			-4.11192	15
-3.59202	14	-2.34049	24	-0.506376	29	-4.41846	14	-4.0131	30	-1.30582	20	-1.83625	11	8.23969	7	-0.211813	14	-4.68573	14			-3.88434	15
-3.5878	14	-0.735998	24	-0.188935	29	-3.99588	14	-4.00769	30	-0.630841	20	-1.83203	11	8.24313	7	-0.203416	14	-4.64001	14			-3.8435	15
-3.58346	14	-0.732762	24	-0.175623	29	-3.9353	14	-3.99848	30	-0.624493	20	-1.82683	11	8.24678	7	-0.188834	14	-4.44455	14			-3.69986	15
-3.55831	14	-0.729404	24	-4.99483	30	-3.81438	14			-0.615072	20	-1.16332	11	8.25435	7	-0.181994	14	-4.24934	14			-3.66865	15
-3.3352	14	-2.04226	25	-4.98778	30	-3.46008	14	2.15442	1	-0.584761	20	-1.15963	11	9.55668	7	-4.9683	15	-3.44721	14			-3.64239	15
-1.85097	14	-2.03763	25	-4.98164	30	-2.6088	14	2.15958	1	-0.370622	20	-1.15594	11	9.56041	7	-4.59065	15	-3.44037	14			-3.63395	15
-1.83066	14	-3.98729	26	-0.440266	30	-1.9813	14	4.10687	1	-4.01275	21	-1.14886	11	9.56803	7	-4.47621	15	-2.96929	14			-3.38483	15
-1.33746	14	-3.98258	26	-0.306532	30	-1.81823	14	4.11244	1	-3.92829	21	-0.960277	11	2.75308	8	-3.72828	15	-4.42202	15			-3.24442	15
-1.33303	14	-3.97746	26	-0.00318099	30	-1.06305	14	4.11596	1	-3.71759	21	-0.864348	11	2.75706	8	-2.8018	15	-4.35137	15			-3.17659	15
-1.32832	14	-4.61869	27			-1.05937	14	5.26076	1	-3.64358	21	-4.80381	12	2.76836	8	-2.02807	15	-4.29607	15			-3.114	15
-0.764425	14	-4.61443	27	0.978364	1	-1.04483	14	5.26424	1	-1.94124	21	-2.952	12	9.10952	8	-1.56587	15	-4.29337	15			-3.0823	15
-0.758321	14	-4.60976	27	3.0491	1	-0.6009	14	5.27468	1	-0.407158	21	-2.58652	12	9.1155	8	-0.0825426	15	-4.27002	15			-3.0139	15
-0.751645	14	-4.60316	27	3.27852	1	-4.94734	15	6.71189	1	-0.386801	21	-1.9167	12	9.11919	8	-4.89232	16	-4.19961	15			-2.83597	15
-0.667308	14	-3.76426	27	3.46001	1	-4.80435	15	6.71578	1	-4.96987	22	-1.21972	12	9.21524	9	-4.52598	16	-4.11192	15			-2.7742	15
-0.227765	14	-3.76102	27	5.02354	1	-4.24197	15	6.71947	1	-4.94996	22	-1.2103	12	9.21843	9	-3.42194	16	-3.88434	15			-2.60979	15
-3.3844	15	-3.74722	27	5.05533	1	-4.1378	15	6.72475	1	-3.57313	22	-1.20682	12	9.22265	9	-2.94008	16	-3.8435	15			-2.49428	15
-3.38067	15	-3.14523	27	5.65117	1	-2.94865	15	6.73139	1	-2.85772	22	-1.20301	12	3.21589	10	-2.81565	16	-3.69986	15			-2.19101	15
-3.37207	15	-3.13958	27	6.9746	1	-2.93526	15	7.69055	1	-2.84768	22	-1.19854	12	3.21933	10	-1.11302	16	-3.66865	15			-1.80238	15
-2.85884	15	-3.13446	27	6.9832	1	-2.92895	15	7.69362	1	-2.7486	22	-1.19002	12	3.22855	10	-1.0123	16	-3.64239	15			-1.77993	15
-2.85437	15	-3.1245	27	7.45367	1	-2.66881	15	7.69669	1	-2.68499	22	-0.819005	12	0.379283	11	-0.748513	16	-3.63395	15			-1.35952	15
-2.84516	15	-1.73289	27	7.49303	1	-2.6648	15	7.70075	1	-2.48318	22	-4.72943	13	0.384075	11	-4.24122	17	-3.38483	15			-3.77891	16
-0.97926	15	-1.7294	27	7.54173	1	-2.65144	15	7.7062	1	-2.23693	22	-4.03695	13	9.96387	11	-4.2336	17	-3.24442	15			-3.6915	16
-0.975246	15	-1.72588	27	8.10886	1	-2.64231	15	7.7148	1	-1.29882	22	-3.67929	13	9.96813	11	-4.12043	17	-3.17659	15			-3.68536	16
-0.971109	15	-1.7208	27	8.2804	1	-1.70355	15	2.56935	2	-1.29022	22	-2.68081	13	9.97255	11	-3.55453	17	-3.114	15			-2.5261	16
-0.964965	15	-1.10513	27	0.423314	2	-1.69576	15	2.57226	2	-0.217513	22	-2.67777	13	9.97951	11	-2.23618	17	-3.0823	15			-2.21157	16
-0.272207	15	-1.10161	27	0.429867	2	-1.68782	15	2.57537	2	-0.185769	22	-2.65922	13	0.120824	12	-1.97146	17	-3.0139	15			-0.957045	16
-0.26635	15	-1.09411	27	0.842622	2	-0.660579	15	2.59073	2	-4.75356	23	-2.03171	13	0.12578	12	-1.13468	17	-2.83597	15			-3.79755	17
-0.259223	15	-3.26062	28	0.851634	2	-0.657425	15	2.96715	2	-4.46	23	-1.68519	13	5.79224	12	-1.10249	17	-2.7742	15			-3.71088	17
-4.99335	16	-3.25722	28	0.86941	2	-0.653984	15	2.97252	2	-4.15382	23	-1.01811	13	5.7949	12	-0.319087	17	-2.60979	15			-3.62887	17
-4.69995	16	-3.25361	28	1.95567	2	-0.649806	15	3.85722	2	-3.9552	23	-0.369059	13	5.79773	12	-3.6781	18	-2.49428	15			-3.40355	17
-4.22322	16	-3.24886	28	1.96186	2	-0.644276	15	3.86115	2	-2.7964	23	-0.27485	13	6.65417	12	-3.67196	18	-2.19101	15			-3.33548	17
-4.21621	16	-3.2378	28	1.97541	2	-0.636945	15	3.86512	2	-1.75954	23	-4.56628	14	6.65716	12	-3.61023	18	-1.80238	15			-3.24504	17
-4.20307	16	-4.794	29	2.88813	2	-0.60303	15	3.87245	2	-1.33695	23	-4.56305	14	6.66408	12	-3.10396	18	-1.77993	15			-2.40822	17
-4.14503	16	-4.78925	29	2.89579	2	-0.559366	15	4.33248	2	-1.31696	23	-4.55956	14	7.61824	12	-1.12018	18	-1.35952	15			-1.59185	17
-3.48889	16	-4.78339	29	2.91365	2	-4.77994	16	4.33461	2	-1.28981	23	-4.55453	14	7.62218	12	-0.941148	18	-3.77891	16			-1.58034	17
-2.26766	16	-4.19213	29	4.17329	2	-4.76871	16	6.94839	2	-1.25159	23	-4.54773	14	7.62619	12	-0.430335	18	-3.6915	16			-0.919649	17
-2.11586	16	-4.18771	29	4.17931	2	-4.75958	16	6.95171	2	-1.21215	23	-3.57427	14	7.63643	12	-4.8041	19	-3.68536	16			-0.90863	17
-0.78814	16	-4.18336	29	4.19369	2	-4.40327	16	6.95896	2	-1.11601	23	-3.56776	14	9.97697	12	-4.27067	19	-2.5261	16			-0.637597	17
-0.784249	16	-4.17517	29	4.21302	2	-4.39573	16	9.20669	2	-0.703054	23	-3.54891	14	9.98103	12	-3.73303	19	-2.21157	16			-4.27465	18
-0.779088	16	-4.25504	30	5.7505	2	-4.38811	16	9.20984	2	-3.29886	24	-2.76907	14	9.98504	12	-3.72316	19	-0.957045	16			-2.88864	18
-4.96931	17	-4.25136	30	5.77909	2	-4.29399	16	9.21291	2	-2.64247	24	-2.7651	14	9.99409	12	-3.13374	19	-0.133051	16			-2.67999	18
-4.96664	17	-4.23989	30	5.79728	2	-3.78178	16	9.21676	2	-1.82974	24	-2.76047	14	5.57384	13	-1.54736	19	-0.129774	16			-2.19638	18
-4.96374	17	-3.34569	30	5.81235	2	-3.76871	16	9.22434	2	-4.66836	25	-2.75367	14	5.57786	13	-1.53478	19	-0.110154	16			-0.116995	18
-4.95534	17	-3.34286	30	6.22724	2	-3.70826	16	2.23106	3	-3.92588	25	-2.72152	14	5.58199	13	-1.51115	19	-3.88741	17			-0.109376	18
-4.58817	17	-3.33991	30	7.89132	2	-3.01951	16	2.2347	3	-3.71211	25	-1.09852	14	5.5881	13	-1.46917	19	-3.8836	17			-0.100897	18
-4.58494	17	-3.33017	30	7.96538	2	-2.7726	16	2.2386	3	-2.76707	25	-1.0891	14	7.07134	14	-0.0988447	19	-3.87926	17			-4.29234	19
-4.58137	17	-2.6014	30	8.61624	2	-2.76839	16	2.24335	3	-2.26933	25	-1.08406	14	7.07646	14	-4.88679	20	-3.79755	17			-4.28595	19
-4.57691	17	-2.59772	30	9.08466	2	-2.76445	16	2.24892	3	-1.3535	25	-0.586393	14	4.70832	15	-4.41452	20	-3.71088	17			-4.2744	19
-4.10976	17	-2.59358	30	9.09121	2	-2.75937	16	2.26133	3	-0.873448	25	-0.211813	14	4.71348	15	-3.57652	20	-3.62887	17			-4.18663	19
-4.02628	17	-2.58821	30	0.632005	3	-1.54802	16	3.36168	3	-4.36878	26	-0.203416	14	4.71913	15	-2.6355	20	-3.40355	17			-3.90027	19
-4.02149	17	-0.726987	30	0.647939	3	-1.54466	16	3.36512	3	-3.61962	26	-0.188834	14	6.07229	15	-2.34583	20	-3.33548	17			-3.76605	19
-4.01445	17	-0.723915	30	1.81387	3	-1.53696	16	3.36869	3	-3.60864	26	-0.181994	14	6.07532	15	-1.11777	20	-3.24504	17			-3.67078	19
-3.05635	17	-0.720679	30	1.82034	3	-1.52467	16	3.37368	3	-3.3637	26	-4.9683	15	6.07847	15	-4.80125	21	-2.40822	17			-3.52758	19
-3.05282	17	-0.71646	30	1.82665	3	-1.51525	16	3.38294	3	-3.04401	26	-4.59065	15	6.08249	15	-4.79342	21	-1.59185	17			-3.20158	19
-3.04914	17	-0.71007	30	2.51199	3	-0.758924	16	9.04293	3	-2.86706	26	-4.47621	15	6.08765	15	-3.80207	21	-1.58034	17			-2.38332	19
-2.02288	17			6.41094	3	-0.752862	16	9.04608	3	-2.83994	26	-3.72828	15	8.39784	15	-3.71224	21	-0.919649	17			-2.3478	19
-2.01973	17	0.00490623	1	6.4263	3	-0.749093	16	9.06431	3	-3.82081	27	-2.8018	15	8.40279	15	-3.62921	21	-0.90863	17			-2.26412	19
-2.01653	17	0.0105997	1	6.43319	3	-0.742171	16	0.24134	4	-2.83519	27	-2.02807	15	8.41082	15	-2.21249	21	-0.637597	17			-2.10802	19
-2.00642	17	0.0187507	1	6.43978	3	-0.236314	16	0.243265	4	-4.74946	28	-1.56587	15	9.3681	15	-1.64273	21	-4.27465	18			-2.09008	19
-2.0015	17	0.0245671	1	6.78307	3	-0.230538	16	3.17101	4	-4.60368	28	-0.162333	15	9.37224	15	-1.55684	21	-2.88864	18			-2.05969	19
-0.653791	17	0.0325953	1	9.76009	3	-3.7783	17	3.17498	4	-4.44967	28	-0.15881	15	9.38301	15	-1.48782	21	-2.67999	18			-2.02909	19
-0.0778103	17	0.650601	1	9.76635	3	-3.77535	17	3.17961	4	-3.4312	28	-0.155001	15	2.70774	16	-0.455666	21	-2.19638	18			-1.55154	19
-0.0741239	17	0.65355	1	9.77311	3	-3.77248	17	3.19047	4	-2.82471	28	-0.150086	15	2.70918	16	-4.50637	22	-0.116995	18			-1.46843	19
-0.0704375	17	0.656827	1	0.266559	4	-3.76875	17	4.83198	4	-0.534749	28	-0.135955	15	3.5616	16	-2.26623	22	-0.109376	18			-1.29095	19
-0.0646621	17	0.660637	1	1.13266	4	-3.75798	17	4.83649	4	-0.382091	28	-0.0825426	15	3.56643	16	-0.681848	22	-0.100897	18			-0.86169	19
-4.98004	18	0.668214	1	2.05631	4	-3.4346	17	4.84157	4	-3.7265	29	-4.89232	16	3.5722	16	-0.633843	22	-4.29234	19			-4.96835	20
-4.65473	18	1.97415	1	2.17383	4	-3.27256	17	5.48067	4	-3.71786	29	-4.52598	16	7.41893	16	-0.594603	22	-4.28595	19			-4.60921	20
-4.48528	18	1.9791	1	2.1846	4	-1.94042	17	5.48477	4	-2.4211	29	-3.44356	16	7.42188	16	-3.47189	23	-4.2744	19			-4.30586	20
-4.48069	18	1.98455	1	2.19271	4	-1.93755	17	5.49095	4	-2.19709	29	-3.44094	16	7.42839	16	-3.05508	23	-4.18663	19			-4.07153	20
-4.3139	18	1.99307	1	2.23764	4	-1.6181	17	7.56521	4	-2.1896	29	-3.43464	16	8.25116	16	-3.04418	23	-3.90027	19			-4.05392	20
-4.04041	18	3.05992	1	3.02633	4	-1.59775	17	7.56886	4	-0.976604	29	-3.42194	16	8.25472	16	-2.99011	23	-3.76605	19			-4.02655	20
-4.03611	18	3.06524	1	3.69414	4	-0.817947	17	7.57242	4	-0.831482	29	-2.94008	16	8.25861	16	-2.67673	23	-3.67078	19			-3.71714	20
-4.02915	18	3.07212	1	5.87482	4	-0.392945	17	7.57668	4	-0.755788	29	-2.81565	16	8.26402	16	-2.66956	23	-3.52758	19			-3.60364	20
-2.61087	18	5.03378	1	6.9023	4	-0.387948	17	7.59483	4	-4.98037	30	-2.7318	16	9.60632	16	-1.80248	23	-3.20158	19			-3.5343	20
-2.608	18	5.03866	1	7.83246	4	-4.46143	18	9.2603	4	-4.74866	30	-2.72857	16	9.61017	16	-1.44575	23	-2.38332	19			-3.20363	20
-2.60501	18	5.0473	1	7.98656	4	-4.45836	18	9.26444	4	-3.23244	30	-2.56067	16	9.61472	16	-1.43461	23	-2.3478	19			-2.41002	20
-2.3044	18	5.62476	1	8.1377	4	-4.45185	18	9.27014	4	-3.22597	30	-2.55752	16	9.62013	16	-0.12733	23	-2.26412	19			-2.39614	20
-2.28634	18	5.62963	1	8.14593	4	-3.61257	18	9.99529	4	-3.2181	30	-2.54822	16	2.7503	17	-3.23219	24	-2.10802	19			-2.37599	20
-2.28269	18	9.59416	1	1.10075	5	-3.49743	18	2.58266	5	-3.19177	30	-1.11302	16	2.75538	17	-2.72584	24	-2.09008	19			-1.75863	20
-2.27032	18	9.59969	1	1.8006	5	-3.48465	18	2.58807	5	-1.92118	30	-1.04769	16	5.73486	17	-2.14769	24	-2.05969	19			-1.72087	20
-1.90119	18	9.60333	1	3.52866	5	-3.39737	18	2.5936	5	-1.52961	30	-1.044	16	5.74039	17	-1.60722	24	-2.02909	19			-0.743438	20
-1.89636	18	9.95309	1	3.53661	5	-2.60463	18	4.26121	5	-1.19545	30	-1.04019	16	7.62275	17	-0.768765	24	-1.55154	19			-4.97824	21
-1.88984	18	9.95846	1	3.55242	5	-2.60102	18	4.26563	5	-0.82071	30	-1.03532	16	7.62611	17	-0.596241	24	-1.46843	19			-4.94818	21
-1.87747	18	1.46964	2	4.24399	5	-2.5968	18	5.45151	5			-1.02417	16	7.63397	17	-0.310668	24	-1.29095	19			-4.81202	21
-0.285847	18	1.47562	2	4.67174	5	-1.65902	18	5.45491	5	0.0788514	1	-1.0123	16	2.96743	18	-0.285846	24	-0.86169	19			-4.7258	21
-0.280809	18	1.48353	2	4.8373	5	-1.65292	18	5.45822	5	0.139964	1	-0.748513	16	2.97071	18	-4.97578	25	-4.96835	20			-4.70311	21
-0.275074	18	7.58937	2	6.108	5	-1.64915	18	5.46228	5	0.19272	1	-4.24122	17	2.97447	18	-4.80067	25	-4.60921	20			-4.69	21
-4.64199	19	7.59223	2	8.15339	5	-0.856491	18	6.4547	5	0.243511	1	-4.2336	17	2.97886	18	-4.25341	25	-4.30586	20			-4.54283	21
-3.88223	19	7.59866	2	9.68996	5	-0.845391	18	6.45892	5	0.288198	1	-4.12043	17	4.2127	18	-3.95821	25	-4.07153	20			-4.52731	21
-3.8787	19	7.98705	2	1.10837	6	-0.84023	18	6.46437	5	0.308105	1	-3.59127	17	4.21626	18	-3.93662	25	-4.05392	20			-4.45805	21
-3.87493	19	7.9911	2	1.11652	6	-0.833717	18	7.01778	5	0.444216	1	-3.58688	17	4.21982	18	-3.21347	25	-4.02655	20			-4.43253	21
-3.87002	19	7.99635	2	2.08412	6	-4.27445	19	7.02106	5	0.733967	1	-3.58172	17	4.22433	18	-2.16763	25	-3.71714	20			-4.42344	21
-3.61754	19	8.00433	2	2.97689	6	-4.27158	19	7.02511	5	0.7712	1	-3.55453	17	4.23101	18	-1.99962	25	-3.60364	20			-4.40746	21
-2.78708	19	0.97181	3	2.98746	6	-3.7792	19	7.02941	5	0.817731	1	-2.23618	17	5.16817	18	-1.96427	25	-3.5343	20			-4.3656	21
-2.77045	19	0.976111	3	3.46132	6	-3.77478	19	7.03801	5	0.847386	1	-1.97146	17	5.17272	18	-1.73043	25	-3.20363	20			-4.30342	21
-1.61742	19	0.980658	3	5.59158	6	-3.76925	19	8.57852	5	1.16872	1	-1.17184	17	5.17858	18	-1.62438	25	-2.43616	20			-4.29294	21
-1.32398	19	1.83304	3	7.10137	6	-3.75503	19	8.58192	5	1.30524	1	-1.16848	17	7.35364	18	-1.16686	25	-2.43247	20			-3.99888	21
-1.31829	19	1.8384	3	7.40845	6	-2.35493	19	8.59053	5	1.32056	1	-1.165	17	7.35643	18	-0.94731	25	-2.42862	20			-3.87604	21
-4.82546	20	2.45383	3	7.41807	6	-2.3483	19	9.38384	5	1.33321	1	-1.16069	17	7.35946	18	-0.341142	25	-2.42325	20			-3.76721	21
-4.82193	20	2.45907	3	7.91303	6	-2.33957	19	9.38851	5	1.47375	1	-1.13468	17	7.36331	18	-4.54185	26	-2.41666	20			-3.43322	21
-4.81861	20	2.46481	3	8.11304	6	-1.68896	19	9.39392	5	1.49939	1	-1.10249	17	8.78823	18	-4.1363	26	-2.41002	20			-3.37445	21
-4.81419	20	3.48676	3	8.65302	6	-1.68442	19	9.41206	5	1.53416	1	-0.408667	17	8.79155	18	-4.10169	26	-2.39614	20			-3.35827	21
-4.80862	20	3.49037	3	9.97668	6	-1.67881	19	2.57942	6	1.56792	1	-0.404776	17	8.79495	18	-3.74554	26	-2.37599	20			-3.34479	21
-4.80186	20	3.83164	3	0.822224	7	-1.66889	19	2.58262	6	2.23999	1	-0.400844	17	8.79925	18	-2.58748	26	-1.75863	20			-3.32984	21
-4.22228	20	3.83627	3	4.93593	7	-0.692609	19	2.5904	6	4.35156	1	-0.395928	17	8.80609	18	-0.612871	26	-1.72087	20			-3.2981	21
-4.21605	20	3.84295	3	6.11742	7	-0.688513	19	3.67748	6	5.19825	1	-0.319087	17	0.139338	19	-0.413682	26	-0.743438	20			-3.2904	21
-4.21195	20	7.69033	3	6.88485	7	-0.684335	19	3.68068	6	5.63108	1	-4.51176	18	0.145032	19	-0.19901	26	-4.97824	21			-3.22007	21
-4.1986	20	7.69369	3	6.90574	7	-0.661725	19	3.68842	6	6.73835	1	-4.508	18	0.154043	19	-4.94043	27	-4.94818	21			-3.13417	21
-3.89664	20	0.228712	4	8.70868	7	-0.251592	19	4.76428	6	8.06099	1	-4.50402	18	2.64823	19	-4.74882	27	-4.81202	21			-2.91524	21
-3.82967	20	0.231948	4	1.56815	8	-0.15636	19	4.76772	6	8.13124	1	-3.6781	18	2.65376	19	-4.58547	27	-4.7258	21			-2.84238	21
-3.82591	20	0.235348	4	2.60731	8	-0.150953	19	4.77116	6	8.16241	1	-3.67196	18	2.66019	19	-4.14916	27	-4.70311	21			-2.81419	21
-3.82156	20	0.251117	4	3.41729	8	-0.145915	19	4.77542	6	8.18137	1	-3.61023	18	4.36175	19	-3.55663	27	-4.69	21			-2.6982	21
-2.57335	20	3.71552	4	4.27426	8	-4.71977	20	4.78099	6	8.19665	1	-3.10396	18	4.36589	19	-3.53124	27	-4.54283	21			-2.68071	21
-2.56904	20	3.71966	4	4.28516	8	-4.71616	20	4.79262	6	8.21443	1	-2.67323	18	4.37101	19	-2.4018	27	-4.52731	21			-2.64458	21
-2.56491	20	3.72396	4	5.85208	8	-4.71239	20	2.57193	7	8.23757	1	-2.66811	18	6.89268	19	-2.24681	27	-4.48754	21			-2.61038	21
-1.89673	20	6.88325	4	7.35442	8	-4.70277	20	2.57455	7	8.56837	1	-2.66049	18	6.89599	19	-0.0905889	27	-4.48541	21			-2.53399	21
-0.53259	20	6.88596	4	0.255664	9	-4.11208	20	2.58569	7	9.18424	1	-1.12018	18	6.90603	19	-4.49638	28	-4.45805	21			-2.52301	21
-0.529273	20	6.89218	4	1.60235	9	-4.0991	20	3.35308	7	9.19837	1	-1.0823	18	7.5258	19	-4.22518	28	-4.43253	21			-2.34844	21
-0.125119	20	7.62541	4	1.61386	9	-3.35317	20	3.35713	7	9.21402	1	-1.07865	18	7.53067	19	-4.07277	28	-4.42344	21			-2.27024	21
-4.33316	21	7.62914	4	1.89935	9	-3.31508	20	3.3616	7	9.48333	1	-1.07509	18	7.53837	19	-4.06003	28	-4.40746	21			-2.11869	21
-4.32976	21	7.63291	4	3.26328	9	-2.59684	20	3.36848	7	9.53117	1	-1.06538	18	9.75313	19	-3.61529	28	-4.3656	21			-2.10657	21
-3.8563	21	2.51224	5	3.49553	9	-1.7282	20	6.33313	7	0.261042	2	-0.941148	18	9.75628	19	-2.81771	28	-4.30342	21			-2.06168	21
-2.91037	21	2.51547	5	3.59027	9	-1.30582	20	6.33694	7	0.287461	2	-0.473794	18	9.75943	19	-2.80469	28	-4.29294	21			-2.01977	21
-1.89214	21	2.51891	5	4.10849	9	-0.630841	20	6.34116	7	0.293564	2	-0.469575	18	9.7632	19	-2.39558	28	-3.99888	21			-1.83947	21
-1.88636	21	2.52281	5	4.91897	9	-0.624493	20	6.34636	7	0.518435	2	-0.464414	18	9.77406	19	-2.38517	28	-3.87604	21			-1.82382	21
-1.87842	21	2.52731	5	5.06434	9	-0.615072	20	8.69387	7	0.584135	2	-0.457123	18	4.22347	20	-2.2858	28	-3.76721	21			-1.80576	21
-1.86957	21	3.13041	5	5.88567	9	-0.584761	20	8.69952	7	0.77034	2	-0.430335	18	4.22671	20	-2.26004	28	-3.43322	21			-1.73969	21
-1.68455	21	3.13422	5	6.90513	9	-0.370622	20	8.70788	7	0.984274	2	-4.8041	19	4.22974	20	-2.22178	28	-3.37445	21			-1.69729	21
-1.61164	21	3.14872	5	8.76078	9	-4.64915	21	2.01278	8	0.999225	2	-4.27067	19	4.23342	20	-2.0833	28	-3.35827	21			-1.59608	21
-1.59833	21	5.61648	5	0.390013	10	-4.64608	21	2.01774	8	1.17146	2	-3.73303	19	4.99766	20	-1.74206	28	-3.34479	21			-1.50703	21
-1.49257	21	5.61992	5	2.27274	10	-4.64292	21	2.02278	8	1.25863	2	-3.72316	19	5.00184	20	-1.44113	28	-3.32984	21			-1.23096	21
-1.37997	21	5.62799	5	2.46436	10	-4.63248	21	3.73794	8	1.59257	2	-3.13374	19	5.00691	20	-0.276425	28	-3.2981	21			-1.21126	21
-1.21294	21	5.63287	5	3.37383	10	-4.01275	21	3.74294	8	2.83063	2	-2.25003	19	5.01674	20	-4.66751	29	-3.2904	21			-1.20151	21
-0.434696	21	7.97382	5	3.43941	10	-3.92829	21	3.7497	8	3.39633	2	-2.24634	19	7.24964	20	-4.1465	29	-3.22007	21			-1.15011	21
-0.428142	21	7.9773	5	3.79089	10	-3.71759	21	5.02077	8	3.88421	2	-2.24257	19	7.25292	20	-4.13511	29	-3.13417	21			-1.13315	21
-0.14138	21	7.98086	5	3.83025	10	-3.64358	21	5.02392	8	3.90862	2	-2.23663	19	7.26066	20	-3.53046	29	-2.91524	21			-1.03919	21
-4.56876	22	8.98086	5	4.23051	10	-2.43149	21	5.02732	8	3.92058	2	-1.54736	19	8.31186	20	-3.41618	29	-2.84238	21			-0.805634	21
-4.56495	22	8.98557	5	4.98066	10	-2.42858	21	5.04088	8	3.93152	2	-1.53478	19	8.31637	20	-2.73805	29	-2.81419	21			-0.719536	21
-4.56057	22	8.99393	5	5.59879	10	-2.42543	21	5.69821	8	4.22635	2	-1.51115	19	9.40849	20	-2.44342	29	-2.6982	21			-0.649576	21
-3.21032	22	0.737723	6	6.37928	10	-2.41711	21	5.70222	8	4.76551	2	-1.46917	19	9.41307	20	-1.71359	29	-2.68071	21			-0.564297	21
-3.20655	22	0.741656	6	6.49483	10	-2.41228	21	5.7159	8	5.04703	2	-0.0988447	19	9.42794	20	-1.23948	29	-2.64458	21			-0.411065	21
-3.2029	22	0.745915	6	7.21032	10	-1.94124	21	7.72987	8	5.48346	2	-4.88679	20	3.34867	21	-1.17177	29	-2.61038	21			-0.185989	21
-2.55205	22	0.750872	6	7.99696	10	-1.93374	21	7.73343	8	5.69432	2	-4.41452	20	3.35416	21	-0.106031	29	-2.53399	21			-0.166001	21
-2.53796	22	2.09039	6	8.64884	10	-1.92833	21	7.74265	8	6.96928	2	-3.57652	20	4.5866	21	-4.13954	30	-2.52301	21			-0.0145304	21
-1.7129	22	2.09502	6	8.70086	10	-0.407158	21	7.75027	8	7.16892	2	-2.6355	20	4.59226	21	-1.28822	30	-2.34844	21			-4.63225	22
-1.67988	22	2.10096	6	9.10206	10	-0.386801	21	7.75531	8	7.23827	2	-2.34583	20	6.83814	21	-1.27282	30	-2.27024	21			-4.299	22
-1.54213	22	2.58593	6	9.65724	10	-4.96987	22	9.3222	8	7.4844	2	-1.29431	20	6.84097	21	-1.26528	30	-2.11869	21			-4.27184	22
-0.539349	22	2.59072	6	9.75489	10	-4.94996	22	9.32682	8	7.52519	2	-1.29082	20	6.84416	21	-0.288795	30	-2.10657	21			-4.24182	22
-0.536154	22	2.59576	6	0.195394	11	-3.57313	22	9.33301	8	7.61371	2	-1.28726	20	6.85465	21			-2.06168	21			-4.22412	22
-0.532222	22	5.60169	6	0.382868	11	-2.85772	22	1.07361	9	7.7662	2	-1.27522	20	8.82335	21	0.0444337	1	-2.01977	21			-4.2147	22
-0.527552	22	5.60677	6	0.422272	11	-2.84768	22	1.07803	9	7.84313	2	-1.11777	20	8.82639	21	0.0754815	1	-1.83947	21			-4.20459	22
-0.521695	22	5.61316	6	0.441236	11	-2.7486	22	1.08254	9	7.89691	2	-0.199484	20	8.82962	21	0.0961254	1	-1.82382	21			-4.18898	22
-4.80035	23	5.98787	6	0.561413	11	-2.68499	22	3.64664	9	9.70878	2	-0.196535	20	8.83359	21	0.102474	1	-1.80576	21			-4.17448	22
-4.7965	23	5.99303	6	0.682327	11	-2.48318	22	3.65201	9	0.134844	3	-0.189653	20	8.8442	21	0.150316	1	-1.73969	21			-3.41619	22
-4.7924	23	8.0353	6	0.915349	11	-2.23693	22	3.66249	9	0.244535	3	-0.184042	20	0.154107	22	0.402958	1	-1.69729	21			-3.35294	22
-4.78404	23	8.04034	6	1.02934	11	-1.89426	22	7.43029	9	0.34075	3	-4.84638	21	0.157179	22	0.61595	1	-1.59608	21			-3.29732	22
-4.59755	23	8.05295	6	1.22415	11	-1.89094	22	7.43492	9	0.381751	3	-4.84294	21	0.160578	22	0.653183	1	-1.50703	21			-2.71589	22
-4.37059	23	9.61652	6	1.28755	11	-1.88758	22	3.99335	10	0.424882	3	-4.8393	21	2.3698	22	0.693447	1	-1.49438	21			-2.64364	22
-4.36293	23	9.62107	6	1.39872	11	-1.88332	22	3.9972	10	0.511144	3	-4.82472	21	2.37312	22	0.887638	1	-1.48868	21			-2.59735	22
-3.61984	23	0.875923	7	1.41535	11	-1.87361	22	4.00658	10	0.560747	3	-4.80125	21	2.37656	22	0.950963	1	-1.47341	21			-2.5611	22
-3.60964	23	0.879118	7	1.46471	11	-1.29882	22	6.15465	10	0.813799	3	-4.79342	21	2.38152	22	0.963169	1	-1.23096	21			-2.51981	22
-3.60456	23	0.883296	7	1.5028	11	-1.29022	22	6.15846	10	1.59319	3	-3.80207	21	3.7137	22	1.09506	1	-1.21126	21			-2.50974	22
-3.33119	23	0.889276	7	1.50911	11	-0.350551	22	8.51481	10	2.45904	3	-3.71224	21	3.7169	22	1.25603	1	-1.20151	21			-2.50282	22
-2.95948	23	1.95879	7	1.67921	11	-0.346701	22	8.51825	10	2.90412	3	-3.62921	21	3.72755	22	1.32149	1	-1.15011	21			-2.00552	22
-2.93691	23	1.96321	7	1.704	11	-0.3424	22	8.52223	10	3.29193	3	-2.69078	21	4.83929	22	1.69455	1	-1.13315	21			-1.99155	22
-1.10124	23	1.96952	7	1.71186	11	-0.332693	22	8.52726	10	3.39314	3	-2.68746	21	4.84252	22	1.76038	1	-1.03919	21			-1.97607	22
-0.618402	23	4.81502	7	1.73152	11	-0.217513	22	8.53468	10	4.24114	3	-2.68398	21	4.85772	22	2.06708	1	-0.805634	21			-1.74124	22
-0.614183	23	4.81792	7	1.93046	11	-0.185769	22	9.00007	10	4.24998	3	-2.67857	21	5.43411	22	2.08687	1	-0.719536	21			-1.46108	22
-0.609759	23	5.69074	7	1.96958	11	-4.9625	23	9.00429	10	4.26018	3	-2.67292	21	5.43903	22	2.18734	1	-0.649576	21			-1.29707	22
-0.607711	23	5.69668	7	2.31377	11	-4.95934	23	9.00924	10	4.34149	3	-2.21249	21	5.44779	22	2.23854	1	-0.564297	21			-1.23334	22
-0.602141	23	5.70057	7	2.47425	11	-4.95598	23	9.01924	10	5.36422	3	-1.68144	21	6.53893	22	2.25542	1	-0.411065	21			-1.19349	22
-4.87768	24	6.55181	7	2.71186	11	-4.95172	23	0.000271811	11	5.37036	3	-1.67738	21	6.54323	22	2.26386	1	-0.185989	21			-1.18128	22
-4.40332	24	6.55561	7	2.79493	11	-4.75356	23	0.00416302	11	5.38814	3	-1.67267	21	6.547	22	2.30867	1	-0.166001	21			-1.17301	22
-4.39857	24	6.55926	7	2.94832	11	-4.52209	23	0.00842287	11	5.91821	3	-1.66219	21	6.55277	22	2.42131	1	-0.0145304	21			-0.864657	22
-4.39345	24	6.56409	7	3.02549	11	-4.51648	23	0.0135019	11	6.50983	3	-1.64273	21	2.70887	23	3.3382	1	-4.63225	22			-0.831644	22
-4.38231	24	6.57179	7	4.30001	11	-4.50391	23	0.0231685	11	6.51606	3	-1.55684	21	2.71276	23	4.17039	1	-4.299	22			-0.798753	22
-3.97754	24	7.47775	7	4.57092	11	-4.46	23	2.08801	11	6.60789	3	-1.48782	21	2.71788	23	4.24375	1	-4.27184	22			-0.777781	22
-3.56175	24	7.48148	7	5.29931	11	-4.37152	23	2.09174	11	6.92738	3	-0.455666	21	2.72431	23	4.35917	1	-4.24182	22			-0.767295	22
-3.08416	24	8.71585	7	6.31594	11	-4.36698	23	2.09591	11	7.0111	3	-4.50637	22	5.24029	23	5.40759	1	-4.22412	22			-0.415325	22
-3.08076	24	8.7197	7	7.05683	11	-4.15382	23	2.10165	11	8.00004	3	-3.5117	22	5.24348	23	5.51593	1	-4.2147	22			-0.34258	22
-3.06655	24	8.72486	7	7.09791	11	-3.9552	23	2.10828	11	8.04531	3	-3.50859	22	5.24696	23	5.96616	1	-4.20459	22			-0.298466	22
-3.06208	24	1.57536	8	7.40343	11	-3.59971	23	4.60796	11	8.05518	3	-3.49052	22	5.25139	23	6.52342	1	-4.18898	22			-0.284048	22
-2.35052	24	1.5799	8	8.26216	11	-3.59553	23	4.61119	11	8.15364	3	-2.26623	22	5.25696	23	6.55467	1	-4.17448	22			-0.212491	22
-2.34585	24	1.58748	8	8.49547	11	-3.59091	23	4.62737	11	8.16094	3	-2.24218	22	6.6213	23	6.59527	1	-3.41619	22			-0.18259	22
-2.34049	24	2.96808	8	8.55212	11	-3.58398	23	6.166	11	8.4198	3	-2.23911	22	6.62699	23	6.63078	1	-3.35294	22			-0.0353382	22
-0.735998	24	2.97242	8	8.70051	11	-2.7964	23	6.16972	11	9.07168	3	-1.54332	22	6.63277	23	6.90116	1	-3.29732	22			-0.0203468	22
-0.732762	24	5.53137	8	9.52713	11	-1.75954	23	8.54	11	9.74892	3	-1.54033	22	9.36382	23	6.95305	1	-2.71589	22			-4.68984	23
-0.729404	24	5.53628	8	0.0412198	12	-1.33695	23	8.54398	11	0.210497	4	-1.53673	22	9.36677	23	6.97837	1	-2.64364	22			-3.84659	23
-4.93457	25	5.54365	8	0.0806234	12	-1.31696	23	8.54811	11	0.54297	4	-1.53161	22	9.99178	23	7.10182	1	-2.59735	22			-3.74878	23
-4.47885	25	6.97206	8	0.114252	12	-1.28981	23	8.55405	11	0.55362	4	-1.15387	22	9.99535	23	7.30949	1	-2.5611	22			-3.72122	23
-3.67161	25	6.97742	8	0.232913	12	-1.25159	23	1.83545	12	0.634516	4	-1.15043	22	9.99928	23	7.43036	1	-2.51981	22			-3.67255	23
-2.67972	25	6.97967	8	2.33978	12	-1.21215	23	1.84065	12	0.660362	4	-1.1424	22	2.90372	24	7.775	1	-2.50974	22			-3.60526	23
-2.57879	25	6.98713	8	5.38234	12	-1.11601	23	1.84659	12	0.724669	4	-0.681848	22	2.90781	24	7.89612	1	-2.50282	22			-3.59543	23
-2.04955	25	9.59236	8	5.39966	12	-0.703054	23	3.6313	12	1.64099	4	-0.675171	22	2.9167	24	7.93409	1	-2.00552	22			-3.58863	23
-2.04226	25	9.59707	8	5.44206	12	-4.55789	24	3.63577	12	1.69084	4	-0.670666	22	3.6983	24	8.09875	1	-1.99155	22			-3.1633	23
-2.03763	25	1.08502	9	5.46794	12	-4.5538	24	6.63872	12	1.78799	4	-0.665095	22	3.70322	24	8.19336	1	-1.97607	22			-3.1164	23
-1.80612	25	1.08998	9	7.1512	12	-3.71256	24	6.64306	12	1.98186	4	-0.656535	22	5.73549	24	9.24215	1	-1.74124	22			-2.84168	23
-1.41811	25	2.46771	9	8.13723	12	-3.70871	24	7.56302	12	2.20718	4	-0.633843	22	5.73943	24	9.29191	1	-1.46108	22			-2.65126	23
-1.4052	25	2.47185	9	8.66574	12	-3.70453	24	7.569	12	2.25523	4	-0.594603	22	5.74365	24	9.77066	1	-1.29707	22			-2.59125	23
-0.703107	25	2.47726	9	0.248887	13	-3.69761	24	9.90758	12	2.35468	4	-3.64998	23	5.75114	24	9.99934	1	-1.23334	22			-2.57609	23
-0.697004	25	3.18878	9	0.531348	13	-3.29886	24	9.91155	12	2.42161	4	-3.64621	23	9.98764	24	0.0752357	2	-1.19349	22			-2.21249	23
-3.98729	26	3.1939	9	1.14706	13	-2.64247	24	9.91548	12	3.43299	4	-3.63892	23	9.9924	24	0.126804	2	-1.18128	22			-2.1692	23
-3.98258	26	5.83664	9	1.68958	13	-2.53016	24	9.92781	12	3.69125	4	-3.47189	23	9.99915	24	0.180094	2	-1.17301	22			-2.06925	23
-3.97746	26	5.83984	9	2.63903	13	-2.52578	24	3.17738	13	3.79897	4	-3.05508	23	0.177618	25	0.209872	2	-0.864657	22			-1.97631	23
-3.42577	26	5.84328	9	2.73754	13	-2.52148	24	3.18181	13	5.08819	4	-3.04418	23	0.182861	25	0.262628	2	-0.831644	22			-1.95555	23
-2.3572	26	5.85737	9	2.88492	13	-2.51566	24	3.19737	13	5.42111	4	-2.99011	23	4.00755	25	0.271557	2	-0.798753	22			-1.85311	23
-1.79064	26	6.5543	9	2.92244	13	-1.82974	24	4.34057	13	5.94143	4	-2.67673	23	4.01222	25	0.328697	2	-0.777781	22			-1.57118	23
-4.61869	27	6.55795	9	2.96696	13	-1.1374	24	4.34376	13	5.94786	4	-2.66956	23	5.53987	25	0.41971	2	-0.767295	22			-1.49901	23
-4.61443	27	6.56164	9	3.29472	13	-1.13379	24	4.34716	13	6.00389	4	-1.80248	23	5.5431	25	0.605137	2	-0.415325	22			-1.47361	23
-4.60976	27	6.56803	9	4.13449	13	-1.12371	24	5.14117	13	6.056	4	-1.44575	23	5.54646	25	0.662972	2	-0.34258	22			-1.28446	23
-4.60316	27	8.71343	9	4.16816	13	-4.66836	25	5.14396	13	6.45876	4	-1.43461	23	5.55396	25	0.698771	2	-0.298466	22			-0.893166	23
-4.59067	27	8.71737	9	4.18122	13	-4.32622	25	5.14691	13	6.63034	4	-0.370387	23	6.31832	25	0.710363	2	-0.284048	22			-0.496057	23
-3.76426	27	8.7215	9	4.26195	13	-4.32278	25	5.15051	13	7.01786	4	-0.367151	23	6.32303	25	0.734939	2	-0.212491	22			-0.439328	23
-3.76102	27	8.72716	9	4.51619	13	-4.30791	25	5.15699	13	7.60191	4	-0.363752	23	6.32925	25	0.743295	2	-0.18259	22			-0.394681	23
-3.74722	27	9.67723	9	4.76498	13	-3.92588	25	5.46271	13	7.66794	4	-0.359615	23	9.17422	25	1.06545	2	-0.0353382	22			-0.227892	23
-3.46992	27	9.68017	9	4.8082	13	-3.71211	25	5.46668	13	7.98071	4	-0.354741	23	9.17799	25	1.12648	2	-0.0203468	22			-4.82353	24
-3.14523	27	9.68325	9	4.90208	13	-2.76707	25	5.47213	13	8.08364	4	-0.346344	23	9.187	25	1.28569	2	-4.68984	23			-3.8078	24
-3.13958	27	1.35974	10	5.12666	13	-2.26933	25	5.47713	13	8.15135	4	-0.12733	23	9.68872	25	1.31125	2	-3.84659	23			-2.68918	24
-3.13446	27	1.36425	10	8.66742	13	-1.3535	25	2.83946	14	8.30872	4	-4.99069	24	9.6931	25	1.59166	2	-3.74878	23			-1.89333	24
-3.1245	27	1.37486	10	8.69875	13	-0.890938	25	2.84544	14	8.5313	4	-3.25193	24	9.69728	25	1.62779	2	-3.72122	23			-1.58388	24
-3.03116	27	2.4474	10	8.71325	13	-0.887661	25	2.84929	14	9.25396	4	-3.24611	24	0.144276	26	1.63537	2	-3.67255	23			-1.26762	24
-1.73289	27	2.45039	10	8.79976	13	-0.880248	25	2.85437	14	9.41522	4	-3.23866	24	0.1487	26	1.72425	2	-3.60526	23			-1.19602	24
-1.7294	27	2.45776	10	9.14022	13	-0.873448	25	2.85933	14	9.53531	4	-3.23219	24	0.563093	26	2.60727	2	-3.59543	23			-1.06934	24
-1.72588	27	8.00364	10	9.14706	13	-4.36878	26	2.87227	14	9.98767	4	-2.74423	24	0.564076	26	2.7494	2	-3.58863	23			-0.924254	24
-1.7208	27	8.00839	10	0.304839	14	-3.61962	26	3.79367	14	0.119115	5	-2.7396	24	2.55621	26	3.31383	2	-3.1633	23			-0.502611	24
-1.56458	27	8.01711	10	1.23631	14	-3.60864	26	3.79891	14	0.243101	5	-2.7326	24	2.5599	26	3.41492	2	-3.1164	23			-0.388128	24
-1.10513	27	8.68169	10	2.39528	14	-3.43952	26	3.80923	14	0.255348	5	-2.72584	24	2.56387	26	3.43974	2	-2.84168	23			-0.303176	24
-1.10161	27	8.68464	10	2.77338	14	-3.43632	26	4.64818	14	0.435532	5	-2.14769	24	2.56907	26	3.73441	2	-2.65126	23			-0.216136	24
-1.09411	27	8.69213	10	2.79874	14	-3.43296	26	4.65174	14	0.513807	5	-1.60722	24	3.51468	26	3.84475	2	-2.59125	23			-4.75243	25
-0.733131	27	1.47601	11	3.39147	14	-3.42887	26	4.66194	14	0.583521	5	-0.797601	24	3.51853	26	3.89165	2	-2.57609	23			-4.18497	25
-0.541806	27	1.48195	11	3.91605	14	-3.42301	26	8.27675	14	0.820516	5	-0.792809	24	3.52234	26	3.96726	2	-2.21249	23			-4.05098	25
-0.533369	27	6.41686	11	3.92354	14	-3.3637	26	8.28056	14	2.8199	5	-0.768765	24	3.5275	26	4.13352	2	-2.1692	23			-2.35413	25
-0.239848	27	6.42223	11	4.51247	14	-3.04401	26	8.28445	14	4.33092	5	-0.596241	24	3.53983	26	4.16383	2	-2.06925	23			-2.31018	25
-4.78237	28	7.06354	11	4.52402	14	-2.86706	26	8.29027	14	5.54768	5	-0.310668	24	4.16697	26	4.36503	2	-1.97631	23			-2.2999	25
-4.70544	28	7.06731	11	4.6471	14	-2.83994	26	8.29723	14	6.44549	5	-0.285846	24	4.17061	26	4.42151	2	-1.95555	23			-2.11394	25
-4.69193	28	7.07231	11	4.90622	14	-2.77404	26	0.0416006	15	7.51602	5	-4.97578	25	4.17422	26	5.07442	2	-1.85311	23			-2.07114	25
-3.51682	28	8.08517	11	5.36358	14	-2.77027	26	0.0474169	15	7.60863	5	-4.80067	25	4.17872	26	5.13995	2	-1.57118	23			-1.25554	25
-3.26062	28	8.08869	11	5.64903	14	-2.76576	26	0.0542982	15	7.61682	5	-4.25341	25	4.18872	26	5.39989	2	-1.49901	23			-0.668336	25
-3.25722	28	8.09262	11	6.93325	14	-2.75917	26	9.6141	15	7.73749	5	-3.95821	25	4.66873	26	5.42524	2	-1.47361	23			-0.433307	25
-3.25361	28	8.09746	11	7.40613	14	-1.15112	26	9.61811	15	7.87225	5	-3.93662	25	4.67324	26	5.52272	2	-1.28446	23			-4.847	26
-3.24886	28	9.4482	11	7.41383	14	-1.14723	26	9.62602	15	0.447124	6	-3.34778	25	4.67811	26	5.72777	2	-0.893166	23			-4.70225	26
-3.2378	28	9.45205	11	7.4244	14	-1.14256	26	0.309398	16	0.457855	6	-3.34393	25	4.687	26	5.77418	2	-0.496057	23			-4.42069	26
-0.572731	28	9.4559	11	7.98588	14	-1.13297	26	0.314231	16	0.464737	6	-3.33987	25	6.50382	26	5.80326	2	-0.439328	23			-4.22367	26
-0.137243	28	9.46077	11	0.217307	15	-3.82081	27	0.322874	16	0.788403	6	-3.32005	25	6.50755	26	5.83734	2	-0.394681	23			-4.14863	26
-0.130362	28	9.46938	11	1.24713	15	-3.81463	27	2.22973	16	0.804951	6	-3.21347	25	6.5123	26	5.84529	2	-0.227892	23			-4.10378	26
-0.0992734	28	2.31881	12	3.07014	15	-3.81172	27	2.23288	16	0.934098	6	-2.77671	25	6.52111	26	5.98725	2	-4.82353	24			-4.0967	26
-4.794	29	2.32159	12	5.10528	15	-3.80861	27	3.01539	16	2.59663	6	-2.77139	25	8.49514	26	6.01117	2	-3.8078	24			-3.64532	26
-4.78925	29	2.33224	12	5.11224	15	-3.7921	27	3.01686	16	2.77722	6	-2.76377	25	8.49838	26	6.02973	2	-2.68918	24			-3.461	26
-4.78339	29	3.07546	12	5.11831	15	-3.36583	27	4.52833	16	2.78836	6	-2.16763	25	8.50669	26	6.0507	2	-1.89333	24			-3.41512	26
-4.5613	29	3.07837	12	5.12666	15	-3.36145	27	4.53165	16	3.34751	6	-1.99962	25	0.556089	27	6.07036	2	-1.58388	24			-3.40648	26
-4.55098	29	3.09021	12	6.03106	15	-3.35665	27	4.54484	16	4.25572	6	-1.96427	25	0.558588	27	6.54861	2	-1.26762	24			-2.67862	26
-4.19213	29	3.09525	12	6.94455	15	-3.34912	27	6.05909	16	5.45917	6	-1.73043	25	3.54069	27	6.7759	2	-1.19602	24			-2.63176	26
-4.18771	29	3.4856	12	8.86042	15	-2.88164	27	6.06384	16	5.69387	6	-1.62438	25	3.54401	27	6.84123	2	-1.06934	24			-2.56979	26
-4.18336	29	3.48871	12	9.10897	15	-2.8782	27	6.0688	16	5.87356	6	-1.16686	25	3.54761	27	7.04095	2	-0.924254	24			-2.52244	26
-4.17517	29	3.49289	12	9.16885	15	-2.87439	27	2.83209	17	6.6321	6	-0.94731	25	3.55765	27	7.05959	2	-0.502611	24			-2.32632	26
-3.02018	29	3.49874	12	9.92629	15	-2.86583	27	2.835	17	6.63943	6	-0.341142	25	4.43882	27	7.0838	2	-0.388128	24			-2.25722	26
-2.74444	29	3.51374	12	0.167336	16	-2.83519	27	3.83799	17	7.98853	6	-4.54185	26	4.443	27	7.2433	2	-0.303176	24			-1.52039	26
-2.73674	29	4.57718	12	0.484367	16	-1.97773	27	3.8409	17	7.99865	6	-4.1363	26	4.44959	27	7.58978	2	-0.216136	24			-1.31194	26
-2.1311	29	4.58034	12	2.97663	16	-1.97396	27	3.85171	17	8.74175	6	-4.10169	26	8.98166	27	7.68181	2	-4.75243	25			-4.68202	27
-1.42958	29	4.58374	12	3.64317	16	-1.9697	27	3.85679	17	9.82699	6	-3.74554	26	8.98568	27	7.70049	2	-4.18497	25			-4.65883	27
-1.34974	29	4.58824	12	5.70223	16	-1.96454	27	3.8658	17	0.192229	7	-2.58748	26	8.9899	27	7.72294	2	-4.05098	25			-4.64667	27
-1.34217	29	4.59389	12	6.12683	16	-1.38381	27	4.81206	17	0.341324	7	-0.868421	26	9.75163	27	7.73224	2	-2.35413	25			-4.06766	27
-1.33512	29	4.60803	12	6.13563	16	-1.37918	27	4.81665	17	2.13198	7	-0.86539	26	9.7552	27	8.64049	2	-2.31018	25			-4.02252	27
-0.506376	29	6.29931	12	7.81631	16	-1.37476	27	4.8216	17	4.04563	7	-0.862154	26	9.76384	27	8.79888	2	-2.2999	25			-4.00097	27
-0.188935	29	6.3025	12	9.33642	16	-4.77682	28	5.78154	17	4.19489	7	-0.857854	26	3.16824	28	8.95334	2	-2.11394	25			-2.90529	27
-0.175623	29	6.30607	12	9.34842	16	-4.77346	28	5.78753	17	4.57947	7	-0.612871	26	3.1725	28	9.13344	2	-2.07114	25			-1.35909	27
-4.99483	30	6.31016	12	3.68315	17	-4.77011	28	5.79564	17	5.33624	7	-0.413682	26	3.17774	28	9.76455	2	-1.25554	25			-4.87482	28
-4.98778	30	6.31877	12	6.80218	17	-4.74946	28	5.80141	17	5.84046	7	-0.19901	26	6.05011	28	9.78262	2	-0.668336	25			-4.86326	28
-4.98164	30	7.12482	12	7.27457	17	-4.60368	28	7.47107	17	6.99255	7	-4.94043	27	6.05437	28	9.86405	2	-0.433307	25			-4.79031	28
-4.25504	30	7.12789	12	7.2885	17	-4.44967	28	7.47471	17	7.24884	7	-4.74882	27	6.06137	28	9.93511	2	-4.847	26			-4.40488	28
-4.25136	30	7.13965	12	8.08128	17	-3.4312	28	7.47893	17	7.62321	7	-4.58547	27	7.3354	28	9.96354	2	-4.70225	26			-4.30543	28
-4.23989	30	7.87656	12	9.13064	17	-2.82471	28	7.48663	17	8.68776	7	-4.14916	27	7.33888	28	9.98017	2	-4.42069	26			-2.15281	28
-3.34569	30	7.8793	12	3.06002	18	-1.25823	28	8.75607	17	8.90346	7	-3.55663	27	7.34224	28	0.129836	3	-4.22367	26			-1.70966	28
-3.34286	30	7.88578	12	3.75937	18	-1.25532	28	8.75943	17	0.0851183	8	-3.53124	27	7.3465	28	0.178988	3	-4.14863	26			-1.66256	28
-3.33991	30	8.2368	12	3.7674	18	-1.24258	28	8.76737	17	0.528634	8	-2.8728	27	7.35276	28	0.185828	3	-4.10378	26			-1.57331	28
-3.33017	30	8.24111	12	3.81115	18	-0.534749	28	9.56974	17	1.24421	8	-2.8685	27	8.05154	28	0.192423	3	-4.0967	26			-1.18677	28
-2.6014	30	8.24836	12	6.05031	18	-0.382091	28	9.57261	17	1.26428	8	-2.86207	27	8.05593	28	0.222692	3	-3.64532	26			-1.16424	28
-2.59772	30	8.57669	12	7.01234	18	-0.362307	28	9.57978	17	1.30466	8	-2.4018	27	8.06031	28	0.271967	3	-3.461	26			-1.10431	28
-2.59358	30	8.5814	12	7.05117	18	-0.357556	28	5.08858	18	2.06689	8	-2.24681	27	9.67037	28	0.332588	3	-3.41512	26			-0.788676	28
-2.58821	30	8.5866	12	7.48031	18	-0.352886	28	5.09223	18	2.86643	8	-1.78105	27	9.67557	28	0.747022	3	-3.40648	26			-4.84045	29
-0.726987	30	1.12007	13	7.75733	18	-0.34707	28	5.09587	18	2.88433	8	-1.77724	27	9.68098	28	0.893782	3	-2.67862	26			-4.78446	29
-0.723915	30	1.12457	13	8.62445	18	-4.55209	29	5.10112	18	3.87041	8	-1.77311	27	9.69281	28	0.979512	3	-2.63176	26			-4.69377	29
-0.720679	30	1.12932	13	8.63703	18	-4.54832	29	8.62856	18	4.70345	8	-1.76688	27	3.32499	29	1.0235	3	-2.56979	26			-4.40099	29
-0.71646	30	1.13678	13	8.99539	18	-4.54427	29	8.63249	18	5.46384	8	-0.0905889	27	3.32942	29	1.05062	3	-2.52244	26			-4.29453	29
-0.71007	30	2.38639	13	9.59148	18	-3.7265	29	8.63741	18	5.72627	8	-4.49638	28	4.30844	29	1.07216	3	-2.32632	26			-3.1413	29
-0.440266	30	2.39016	13	2.08259	19	-3.71786	29	8.64298	18	6.14414	8	-4.4902	28	4.31143	29	1.07974	3	-2.25722	26			-2.91258	29
-0.306532	30	2.39413	13	2.29996	19	-2.4211	29	9.21072	18	7.72303	8	-4.48618	28	4.31451	29	1.08699	3	-1.52039	26			-1.84328	29
-0.00318099	30	2.39917	13	3.84785	19	-2.19709	29	9.21548	18	8.13062	8	-4.48159	28	4.32327	29	1.3008	3	-1.31194	26			-1.37027	29
		2.40544	13	3.85542	19	-2.1896	29	9.22465	18	8.80565	8	-4.22518	28	5.92276	29	1.32849	3	-4.68202	27			-1.27139	29
0.00490623	1	2.41084	13	4.33683	19	-0.976604	29	4.05561	19	9.66458	8	-4.07277	28	5.92743	29	1.40738	3	-4.65883	27			-1.18914	29
0.0105997	1	2.42899	13	4.37005	19	-0.910863	29	4.05889	19	9.86529	8	-4.06003	28	5.93214	29	1.57093	3	-4.64667	27			-1.17174	29
0.0187507	1	7.5701	13	7.86788	19	-0.905456	29	4.07175	19	9.88007	8	-3.61529	28	8.55015	29	1.58236	3	-4.06766	27			-1.09162	29
0.0245671	1	7.57305	13	8.86456	19	-0.899967	29	4.07744	19	0.56599	9	-2.81771	28	8.55384	29	2.07667	3	-4.02252	27			-1.06565	29
0.0325953	1	7.57604	13	9.41457	19	-0.892103	29	5.35216	19	1.34763	9	-2.80469	28	8.56301	29	2.28901	3	-4.00097	27			-0.520838	29
0.650601	1	7.57964	13	0.501161	20	-0.831482	29	5.3574	19	1.90391	9	-2.39558	28	9.20125	29	2.40886	3	-2.90529	27			-0.50724	29
0.65355	1	7.59004	13	0.794189	20	-0.755788	29	1.80792	20	1.91485	9	-2.38517	28	9.20432	29	2.46104	3	-1.35909	27			-0.424295	29
0.656827	1	8.67704	13	0.800743	20	-4.98037	30	1.81267	20	2.04277	9	-2.2858	28	4.69441	30	2.47488	3	-4.87482	28			-0.110418	29
0.660637	1	8.68151	13	0.807542	20	-4.74866	30	1.81833	20	2.2354	9	-2.26004	28	4.69769	30	2.48107	3	-4.86326	28			-4.54341	30
0.668214	1	8.68876	13	3.19158	20	-4.01859	30	9.07478	20	3.63951	9	-2.22178	28	4.70125	30	2.49172	3	-4.79031	28			-4.44371	30
0.978364	1	0.237296	14	3.41392	20	-4.0131	30	9.07826	20	4.1559	9	-2.0833	28	4.7058	30	2.50466	3	-4.40488	28			-4.37432	30
1.97415	1	0.24004	14	3.4208	20	-4.00769	30	9.08195	20	4.17933	9	-1.74206	28	4.71276	30	2.82055	3	-4.30543	28			-3.79294	30
1.9791	1	0.242866	14	3.42989	20	-3.99848	30	9.08694	20	4.50602	9	-1.44113	28	6.12539	30	2.88506	3	-2.15281	28			-3.69803	30
1.98455	1	1.21198	14	5.10069	20	-3.23244	30	9.09473	20	5.12763	9	-1.01948	28	6.12904	30	3.02666	3	-1.70966	28			-3.66469	30
1.99307	1	1.21628	14	5.33245	20	-3.22597	30	2.67435	21	5.21648	9	-1.01522	28	6.13293	30	3.08818	3	-1.66256	28			-3.6252	30
3.0491	1	1.22087	14	6.24647	20	-3.2181	30	2.67755	21	5.22324	9	-1.01063	28	7.06719	30	3.25403	3	-1.57331	28			-3.48311	30
3.05992	1	1.22796	14	6.25307	20	-3.19177	30	2.68099	21	5.61006	9	-1.0015	28	7.07063	30	3.30605	3	-1.18677	28			-3.47201	30
3.06524	1	2.13707	14	6.26208	20	-1.92118	30	4.84593	21	5.94643	9	-0.99593	28	7.07419	30	3.34176	3	-1.16424	28			-3.28081	30
3.07212	1	2.14034	14	8.6156	20	-1.52961	30	4.84925	21	6.61334	9	-0.276425	28	7.07931	30	3.37408	3	-1.10431	28			-3.17382	30
3.27852	1	2.14358	14	9.00276	20	-1.19545	30	4.85765	21	7.78517	9	-4.66751	29	7.71555	30	3.41828	3	-0.788676	28			-2.81325	30
3.46001	1	2.14808	14	9.18978	20	-0.82071	30	6.43474	21	7.85378	9	-4.16886	29	7.71866	30	3.48828	3	-4.84045	29			-2.17513	30
5.02354	1	3.39888	14	0.0104178	21			6.44063	21	8.82527	9	-4.16329	29	7.72206	30	3.49811	3	-4.78446	29			-1.9331	30
5.03378	1	3.40425	14	0.36931	21	0.0788514	1	6.45517	21	9.49087	9	-4.15699	29	7.73443	30	3.50437	3	-4.69377	29			-1.90615	30
5.03866	1	3.87742	14	0.906174	21	0.139964	1	7.95517	21	0.259754	10	-4.1465	29	8.24504	30	3.59719	3	-4.40099	29			-0.930153	30
5.0473	1	3.88184	14	0.981991	21	0.19272	1	7.9596	21	0.281627	10	-4.13511	29	8.25036	30	3.63803	3	-4.29453	29			-0.8588	30
5.05533	1	3.89155	14	2.02963	21	0.243511	1	7.96566	21	0.473934	10	-3.53046	29	8.2543	30	3.82861	3	-3.1413	29			-0.802603	30
5.62476	1	4.86325	14	2.06285	21	0.288198	1	9.34139	21	1.00695	10	-3.41618	29	8.26191	30	3.84254	3	-2.91258	29			-0.0100658	30
5.62963	1	4.86648	14	2.36767	21	0.308105	1	9.3463	21	1.05045	10	-2.73805	29			3.85032	3	-1.84328	29
5.65117	1	4.86988	14	3.42022	21	0.444216	1	9.36105	21	1.31272	10	-2.55569	29			4.17141	3	-1.37027	29			0.0427089	1
6.9746	1	4.87435	14	4.82516	21	0.733967	1	4.85617	22	2.05385	10	-2.55229	29			4.35618	3	-1.27139	29			0.0717087	1
6.9832	1	8.85149	14	4.83367	21	0.7712	1	4.85945	22	2.09141	10	-2.54889	29			4.60043	3	-1.18914	29			0.0928441	1
7.45367	1	8.85571	14	5.45512	21	0.817731	1	4.86285	22	2.10574	10	-2.54451	29			4.7818	3	-1.17174	29			0.164238	1
7.49303	1	8.86022	14	5.69892	21	0.847386	1	4.86715	22	2.97889	10	-2.53882	29			5.21126	3	-1.09162	29			0.176853	1
7.54173	1	8.87468	14	6.43399	21	1.16872	1	4.8742	22	2.99106	10	-2.44342	29			5.24788	3	-1.06565	29			0.299242	1
8.10886	1	2.45119	15	8.51218	21	1.30524	1	8.35597	22	4.10165	10	-1.71359	29			5.40083	3	-0.520838	29			0.705853	1
8.2804	1	2.45443	15	9.82982	21	1.32056	1	8.36187	22	4.49265	10	-1.23948	29			5.44126	3	-0.50724	29			0.854784	1
9.59416	1	2.45787	15	9.86132	21	1.33321	1	3.43666	23	4.60816	10	-1.17177	29			5.60178	3	-0.424295	29			1.1628	1
9.59969	1	2.46237	15	0.621993	22	1.47375	1	3.44178	23	4.67108	10	-1.1655	29			5.84643	3	-0.110418	29			1.22105	1
9.60333	1	2.4677	15	1.07546	22	1.49939	1	5.854	23	4.74656	10	-1.16129	29			5.85249	3	-4.54341	30			1.45768	1
9.95309	1	2.47278	15	3.07812	22	1.53416	1	5.85724	23	5.23256	10	-1.1524	29			5.9519	3	-4.49483	30			1.70004	1
9.95846	1	4.38213	15	3.10614	22	1.56792	1	5.86457	23	5.24366	10	-0.453332	29			6.42528	3	-4.48954	30			1.78011	1
0.423314	2	4.38565	15	3.64026	22	2.15442	1	6.39722	23	5.43338	10	-0.449932	29			6.78245	3	-4.47935	30			1.78814	1
0.429867	2	9.9842	15	3.64661	22	2.15958	1	6.4009	23	5.52427	10	-0.435801	29			6.83136	3	-4.44371	30			1.79629	1
0.842622	2	9.98842	15	3.87005	22	2.23999	1	6.40459	23	6.14801	10	-0.106031	29			6.86302	3	-4.37432	30			1.86703	1
0.851634	2	9.99268	15	4.03635	22	4.10687	1	6.41249	23	6.71179	10	-4.13954	30			6.92581	3	-3.79294	30			1.88919	1
0.86941	2	9.99788	15	6.20744	22	4.11244	1	7.40152	23	7.30637	10	-2.42355	30			7.42524	3	-3.69803	30			2.00974	1
1.46964	2	0.0893479	16	6.21735	22	4.11596	1	7.40496	23	8.04758	10	-2.41974	30			8.32608	3	-3.66469	30			3.16395	1
1.47562	2	0.092256	16	6.23246	22	4.35156	1	7.4129	23	9.02898	10	-2.41569	30			8.62922	3	-3.6252	30			3.1762	1
1.48353	2	0.0992602	16	6.24201	22	5.19825	1	0.417287	24	9.42482	10	-1.28822	30			8.75542	3	-3.48311	30			3.74157	1
1.95567	2	0.491248	16	7.13166	22	5.26076	1	0.421669	24	9.95718	10	-1.27282	30			8.81252	3	-3.47201	30			3.89644	1
1.96186	2	0.496	16	0.0680077	23	5.26424	1	3.62139	24	0.128436	11	-1.26528	30			9.02146	3	-3.28081	30			4.00298	1
1.97541	2	0.501325	16	3.32864	23	5.27468	1	3.62688	24	0.185248	11	-0.288795	30			9.15761	3	-3.17382	30			4.09821	1
2.88813	2	0.875208	16	3.34375	23	5.63108	1	4.1748	24	0.356133	11					9.2716	3	-2.81325	30			4.19213	1
2.89579	2	0.878526	16	5.35706	23	6.71189	1	4.17812	24	0.4025	11	0.0444337	1			9.43056	3	-2.17513	30			4.38366	1
2.91365	2	0.886841	16	8.08038	23	6.71578	1	4.18181	24	0.463244	11	0.0754815	1			9.52588	3	-1.9331	30			4.47492	1
4.17329	2	2.55171	16	8.22456	23	6.71947	1	4.19901	24	0.547499	11	0.0961254	1			9.58298	3	-1.90615	30			4.59198	1
4.17931	2	2.55535	16	9.08689	23	6.72475	1	5.38939	24	0.656535	11	0.102474	1			9.62873	3	-0.930153	30			4.60448	1
4.19369	2	2.55953	16	2.1129	24	6.73139	1	5.393	24	0.72375	11	0.150316	1			9.67141	3	-0.8588	30			4.61885	1
4.21302	2	2.56522	16	2.71731	24	6.73835	1	5.39681	24	0.877678	11	0.402958	1			0.398411	4	-0.802603	30			4.83824	1
5.7505	2	2.57464	16	3.46024	24	7.69055	1	5.40086	24	1.33893	11	0.61595	1			0.407545	4	-0.0100658	30			4.87674	1
5.77909	2	3.78719	16	3.78854	24	7.69362	1	5.40877	24	1.37923	11	0.653183	1			0.708315	4					4.91643	1
5.79728	2	3.7905	16	3.80332	24	7.69669	1	5.92712	24	2.11832	11	0.693447	1			0.750135	4	0.0427089	1			5.15166	1
5.81235	2	3.79374	16	4.43177	24	7.70075	1	5.93125	24	2.34208	11	0.887638	1			0.789498	4	0.0717087	1			5.18435	1
6.22724	2	4.35071	16	7.15316	24	7.7062	1	5.9367	24	2.44838	11	0.950963	1			0.980126	4	0.0928441	1			5.38079	1
7.58937	2	4.35387	16	7.70993	24	7.7148	1	6.57199	24	3.16895	11	0.963169	1			1.03862	4	0.164238	1			5.458	1
7.59223	2	4.37091	16	8.28477	24	8.06099	1	6.57547	24	3.34229	11	1.09506	1			1.13106	4	0.176853	1			5.53054	1
7.59866	2	5.05883	16	9.05998	24	8.13124	1	6.59223	24	3.3506	11	1.25603	1			1.1429	4	0.25947	1			5.57556	1
7.89132	2	5.0619	16	1.22579	25	8.16241	1	0.124258	25	3.5081	11	1.32149	1			1.15671	4	0.262788	1			5.59518	1
7.96538	2	5.06518	16	1.78739	25	8.18137	1	0.127412	25	3.52522	11	1.69455	1			1.18394	4	0.299242	1			5.66395	1
7.98705	2	5.07464	16	1.79382	25	8.19665	1	0.130853	25	3.5665	11	1.76038	1			1.19963	4	0.705853	1			5.71318	1
7.9911	2	5.29878	16	1.83044	25	8.21443	1	0.135031	25	4.68041	11	2.06708	1			1.31764	4	0.854784	1			6.3146	1
7.99635	2	5.30263	16	2.51222	25	8.23757	1	0.141871	25	4.73526	11	2.08687	1			1.38223	4	1.1628	1			6.58621	1
8.00433	2	7.84555	16	2.63895	25	8.56837	1	2.78085	25	4.88173	11	2.18734	1			1.39444	4	1.22105	1			6.65363	1
8.61624	2	7.84895	16	2.64817	25	9.18424	1	2.78564	25	4.99446	11	2.23854	1			1.57814	4	1.45768	1			6.74526	1
9.08466	2	0.516603	17	3.02123	25	9.19837	1	3.47738	25	5.06884	11	2.25542	1			2.00691	4	1.70004	1			6.76832	1
9.09121	2	0.521764	17	3.02832	25	9.21402	1	3.48032	25	6.72682	11	2.26386	1			2.60264	4	1.78011	1			6.80129	1
0.632005	3	0.526433	17	3.0488	25	9.48333	1	3.48733	25	6.81997	11	2.30867	1			2.62185	4	1.78814	1			6.82038	1
0.647939	3	1.63608	17	3.28002	25	9.53117	1	4.11447	25	6.90602	11	2.42131	1			2.81919	4	1.79629	1			6.84897	1
0.97181	3	1.64071	17	3.37279	25	0.261042	2	4.11902	25	8.3513	11	3.3382	1			2.98545	4	1.86703	1			7.38014	1
0.976111	3	1.64497	17	4.02226	25	0.287461	2	4.13405	25	8.65096	11	4.17039	1			3.00794	4	1.88919	1			7.4125	1
0.980658	3	3.08128	17	4.31188	25	0.293564	2	6.49888	25	9.28314	11	4.24375	1			3.02338	4	2.00974	1			7.43896	1
1.81387	3	3.08427	17	7.97208	25	0.518435	2	6.50318	25	9.34851	11	4.35917	1			3.10288	4	3.16395	1			7.59612	1
1.82034	3	3.08742	17	7.98043	25	0.584135	2	6.50789	25	9.7235	11	5.40759	1			3.25222	4	3.1762	1			7.83357	1
1.82665	3	3.09107	17	8.75647	25	0.77034	2	8.28757	25	0.176236	12	5.51593	1			3.30433	4	3.74157	1			8.16354	1
1.83304	3	3.09918	17	0.391224	26	0.984274	2	8.29056	25	0.190818	12	5.96616	1			3.32333	4	3.89644	1			8.17399	1
1.8384	3	3.59807	17	0.479493	26	0.999225	2	8.29375	25	0.349539	12	6.52342	1			3.33849	4	4.00298	1			8.19045	1
2.45383	3	3.60323	17	0.512752	26	1.17146	2	8.29793	25	0.44006	12	6.55467	1			3.78233	4	4.09821	1			8.20729	1
2.45907	3	4.45828	17	0.521436	26	1.25863	2	8.30841	25	0.47504	12	6.59527	1			4.06807	4	4.19213	1			8.22306	1
2.46481	3	4.46188	17	0.5293	26	1.59257	2	9.08297	25	0.829919	12	6.63078	1			4.33902	4	4.38366	1			8.57552	1
2.51199	3	4.47839	17	0.931979	26	2.56935	2	9.08637	25	1.57715	12	6.90116	1			4.6882	4	4.47492	1			9.00625	1
3.48676	3	6.80902	17	1.21989	26	2.57226	2	9.09972	25	1.88276	12	6.95305	1			4.70557	4	4.59198	1			9.091	1
3.49037	3	6.81352	17	1.35809	26	2.57537	2	0.057534	26	2.02321	12	6.97837	1			4.88715	4	4.60448	1			9.77966	1
3.83164	3	8.61003	17	1.65894	26	2.59073	2	0.0623673	26	2.05647	12	7.10182	1			5.07667	4	4.61885	1			9.84508	1
3.83627	3	8.61593	17	1.69273	26	2.83063	2	0.0703955	26	2.23096	12	7.30949	1			5.85397	4	4.83824	1			9.89693	1
3.84295	3	8.62076	17	2.11904	26	2.96715	2	1.82103	26	2.28974	12	7.43036	1			5.91385	4	4.87674	1			0.152359	2
6.41094	3	8.62621	17	2.29439	26	2.97252	2	1.82504	26	2.43789	12	7.775	1			6.8518	4	4.91643	1			0.172593	2
6.4263	3	9.64141	17	3.58214	26	3.39633	2	1.8291	26	2.54922	12	7.89612	1			6.96395	4	5.15166	1			0.189305	2
6.43319	3	9.64698	17	3.59783	26	3.85722	2	1.83574	26	2.83623	12	7.93409	1			7.00237	4	5.18435	1			0.23944	2
6.43978	3	0.53569	18	4.15271	26	3.86115	2	4.20409	26	2.95075	12	8.09875	1			7.0387	4	5.38079	1			0.413193	2
6.78307	3	0.538803	18	4.16377	26	3.86512	2	4.20814	26	3.11893	12	8.19336	1			7.16752	4	5.458	1			0.850975	2
7.69033	3	0.542899	18	4.42375	26	3.87245	2	4.21249	26	3.43859	12	9.24215	1			7.2179	4	5.53054	1			0.999373	2
7.69369	3	3.07063	18	4.43358	26	3.88421	2	4.21982	26	3.47983	12	9.29191	1			7.56577	4	5.57556	1			1.10042	2
9.76009	3	3.07575	18	6.80205	26	3.90862	2	6.54901	26	3.48729	12	9.77066	1			8.31624	4	5.59518	1			1.11279	2
9.76635	3	4.26507	18	6.81418	26	3.92058	2	6.55254	26	3.4965	12	9.99934	1			8.83255	4	5.66395	1			1.12188	2
9.77311	3	4.2697	18	8.0234	26	3.93152	2	6.5611	26	3.80116	12	0.0752357	2			8.93978	4	5.71318	1			1.13794	2
0.228712	4	4.27359	18	8.22501	26	4.22635	2	8.44809	26	3.94211	12	0.126804	2			9.19222	4	6.3146	1			1.16555	2
0.231948	4	5.91195	18	8.44865	26	4.33248	2	8.45255	26	4.97946	12	0.180094	2			9.29011	4	6.58621	1			1.48164	2
0.235348	4	5.9158	18	9.41621	26	4.33461	2	8.45681	26	5.75443	12	0.209872	2			9.3733	4	6.65363	1			1.51936	2
0.251117	4	5.92072	18	0.638951	27	4.76551	2	0.0751059	27	5.98655	12	0.262628	2			9.39067	4	6.74526	1			1.53063	2
0.266559	4	6.39524	18	1.38094	27	5.04703	2	0.0795706	27	6.86891	12	0.271557	2			9.68865	4	6.76832	1			1.66973	2
1.13266	4	6.40015	18	1.39065	27	5.48346	2	2.51526	27	6.97553	12	0.328697	2			9.75538	4	6.80129	1			1.69455	2
2.05631	4	7.05797	18	1.39688	27	5.69432	2	2.51924	27	7.95235	12	0.41971	2			9.78741	4	6.82038	1			2.27258	2
2.17383	4	7.06203	18	2.86235	27	6.94839	2	2.52878	27	8.16591	12	0.605137	2			9.80392	4	6.84897	1			2.42208	2
2.1846	4	7.06813	18	3.49772	27	6.95171	2	5.36105	27	8.88276	12	0.662972	2			9.93487	4	7.38014	1			2.81718	2
2.19271	4	7.07309	18	3.54138	27	6.95896	2	5.3651	27	8.92601	12	0.698771	2			0.0443518	5	7.4125	1			3.08707	2
2.23764	4	7.54384	18	4.28522	27	6.96928	2	5.36953	27	9.98135	12	0.710363	2			0.0955929	5	7.43896	1			3.18775	2
3.02633	4	7.54851	18	4.37185	27	7.16892	2	8.11127	27	0.25701	13	0.734939	2			0.130655	5	7.59612	1			3.27233	2
3.69414	4	7.55375	18	4.7239	27	7.23827	2	8.11639	27	0.296618	13	0.743295	2			0.277742	5	7.83357	1			3.34704	2
3.71552	4	0.328637	19	5.06911	27	7.4844	2	3.87899	28	0.416304	13	1.06545	2			0.345368	5	8.16354	1			3.45231	2
3.71966	4	0.332897	19	5.65411	27	7.52519	2	3.88485	28	1.07154	13	1.10809	2			0.582609	5	8.17399	1			3.4671	2
3.72396	4	0.668196	19	6.28202	27	7.61371	2	3.89525	28	1.19094	13	1.11005	2			0.699918	5	8.19045	1			3.48283	2
5.87482	4	0.672702	19	6.29292	27	7.7662	2	6.57367	28	2.45829	13	1.11828	2			0.950553	5	8.20729	1			3.51031	2
6.88325	4	0.682245	19	6.30681	27	7.84313	2	6.57719	28	2.49908	13	1.12648	2			0.987376	5	8.22306	1			3.51756	2
6.88596	4	2.9618	19	6.37853	27	7.89691	2	6.58518	28	3.17103	13	1.28569	2			1.0106	5	8.57552	1			3.52632	2
6.89218	4	2.96524	19	7.50276	27	9.20669	2	8.29932	28	3.23063	13	1.31125	2			1.17907	5	9.00625	1			3.65859	2
6.9023	4	5.77633	19	7.54286	27	9.20984	2	8.30272	28	3.32611	13	1.59166	2			1.30011	5	9.091	1			4.08785	2
7.62541	4	5.77989	19	7.92805	27	9.21291	2	8.30633	28	3.49482	13	1.62779	2			1.50478	5	9.77966	1			4.10108	2
7.62914	4	5.78354	19	9.62679	27	9.21676	2	8.31108	28	5.09264	13	1.63537	2			2.30965	5	9.84508	1			4.11242	2
7.63291	4	5.78907	19	9.63576	27	9.22434	2	9.94465	28	5.16624	13	1.72425	2			2.33931	5	9.89693	1			4.11963	2
7.83246	4	6.94668	19	0.654433	28	9.70878	2	9.94768	28	5.58051	13	2.60727	2			2.45797	5	0.152359	2			4.13249	2
7.98656	4	6.95	19	1.04097	28	0.134844	3	9.95153	28	6.1413	13	2.7494	2			2.59535	5	0.172593	2			4.1855	2
8.1377	4	6.95344	19	1.04732	28	0.244535	3	9.95657	28	6.27843	13	3.31383	2			2.93761	5	0.189305	2			4.1993	2
8.14593	4	6.95754	19	1.60946	28	0.34075	3	1.35345	29	7.25906	13	3.41492	2			3.52518	5	0.23944	2			4.20589	2
1.10075	5	6.96532	19	2.06154	28	0.381751	3	1.3573	29	8.2138	13	3.43974	2			3.65937	5	0.413193	2			4.35331	2
1.8006	5	0.930627	21	2.54872	28	0.424882	3	1.36128	29	8.33094	13	3.73441	2			3.78397	5	0.850975	2			4.49339	2
2.51224	5	0.935788	21	2.5558	28	0.511144	3	3.07472	29	8.79293	13	3.84475	2			4.0346	5	0.999373	2			4.8581	2
2.51547	5	0.942342	21	2.68229	28	0.560747	3	3.07836	29	8.81403	13	3.89165	2			4.1003	5	1.10042	2			4.89579	2
2.51891	5	3.55125	21	2.99371	28	0.813799	3	5.46749	29	8.85298	13	3.96726	2			4.56295	5	1.11279	2			5.02641	2
2.52281	5	3.55486	21	3.66316	28	1.59319	3	5.47084	29	8.96279	13	4.13352	2			6.82436	5	1.12188	2			5.26312	2
2.52731	5	3.55969	21	3.84465	28	2.23106	3	5.4742	29	9.35429	13	4.16383	2			7.22732	5	1.13794	2			5.34307	2
3.13041	5	5.46176	21	5.81684	28	2.2347	3	5.47834	29	0.303295	14	4.36503	2			7.25329	5	1.16555	2			5.44838	2
3.13422	5	5.46589	21	6.07272	28	2.2386	3	6.65562	29	0.325536	14	4.42151	2			7.28839	5	1.48164	2			5.48254	2
3.14872	5	6.4412	21	6.07964	28	2.24335	3	6.65967	29	0.368257	14	5.07442	2			7.33713	5	1.51936	2			5.50158	2
3.52866	5	6.44599	21	6.09242	28	2.24892	3	7.65226	29	0.583871	14	5.13995	2			7.5124	5	1.53063	2			5.68197	2
3.53661	5	8.24319	21	6.13121	28	2.26133	3	7.65639	29	0.766431	14	5.39989	2			7.94216	5	1.53845	2			5.74124	2
3.55242	5	8.24655	21	6.75782	28	2.45904	3	7.66082	29	0.882143	14	5.42524	2			8.04206	5	1.54082	2			5.83111	2
4.24399	5	8.25016	21	7.50812	28	2.90412	3	7.67126	29	1.36244	14	5.52272	2			8.21131	5	1.66973	2			5.87793	2
4.67174	5	8.25966	21	8.72079	28	3.29193	3	8.67863	29	1.7181	14	5.72777	2			8.29515	5	1.69455	2			6.04279	2
4.8373	5	8.8793	21	9.54859	28	3.36168	3	8.68253	29	2.10923	14	5.77418	2			8.77016	5	2.27258	2			6.05848	2
5.61648	5	8.88315	21	9.70187	28	3.36512	3	8.68638	29	2.59157	14	5.80326	2			8.84098	5	2.42208	2			6.47578	2
5.61992	5	8.89368	21	0.138131	29	3.36869	3	8.69125	29	3.0303	14	5.83734	2			9.42336	5	2.81718	2			6.52706	2
5.62799	5	9.46036	21	0.693919	29	3.37368	3	8.70006	29	3.43543	14	5.84529	2			9.53505	5	3.08707	2			6.61922	2
5.63287	5	9.46553	21	0.871112	29	3.38294	3	0.329532	30	3.78601	14	5.98725	2			9.77438	5	3.18775	2			7.277	2
6.108	5	1.04749	22	2.04118	29	3.39314	3	0.332809	30	3.83819	14	6.01117	2			9.82358	5	3.27233	2			7.40136	2
7.97382	5	1.05105	22	3.64071	29	4.24114	3	0.336168	30	4.66862	14	6.02973	2			0.172393	6	3.34704	2			7.42159	2
7.9773	5	1.06625	22	3.91527	29	4.24998	3	0.340632	30	4.67644	14	6.0507	2			0.26525	6	3.45231	2			7.43502	2
7.98086	5	1.70895	22	4.87496	29	4.26018	3	0.347595	30	5.30411	14	6.07036	2			0.439781	6	3.4671	2			7.51613	2
8.15339	5	1.71186	22	5.02058	29	4.34149	3	3.11019	30	5.78982	14	6.54861	2			0.585312	6	3.48283	2			8.14482	2
8.98086	5	1.71489	22	5.19056	29	5.36422	3	3.11543	30	5.88415	14	6.7759	2			0.667928	6	3.51031	2			8.17034	2
8.98557	5	1.71915	22	5.43096	29	5.37036	3	3.59123	30	7.59911	14	6.84123	2			0.806537	6	3.51756	2			8.20897	2
8.99393	5	3.11593	22	5.5753	29	5.38814	3	3.59594	30	7.60521	14	7.04095	2			0.82116	6	3.52632	2			8.2197	2
9.68996	5	3.12044	22	5.5966	29	5.91821	3	3.60151	30	7.61361	14	7.05959	2			1.13238	6	3.65859	2			8.25259	2
0.737723	6	5.66758	22	8.12314	29	6.50983	3	6.09282	30	7.63048	14	7.0838	2			1.47345	6	4.08785	2			8.33607	2
0.741656	6	5.67328	22	8.13399	29	6.51606	3	6.09651	30	8.30575	14	7.2433	2			1.48557	6	4.10108	2			8.34831	2
0.745915	6	5.67717	22	0.218372	30	6.60789	3	6.10478	30	9.31689	14	7.58978	2			1.49672	6	4.11242	2			8.35597	2
0.750872	6	5.68282	22	1.54949	30	6.92738	3	8.02512	30	9.91323	14	7.68181	2			1.50921	6	4.11963	2			8.99716	2
1.10837	6	5.68982	22	1.7255	30	7.0111	3	8.03073	30	0.0901383	15	7.70049	2			1.5582	6	4.13249	2			9.09985	2
1.11652	6	7.27895	22	1.94771	30	8.00004	3	8.03753	30	0.161655	15	7.72294	2			1.69783	6	4.1855	2			9.59362	2
2.08412	6	7.28231	22	4.48347	30	8.04531	3	8.0474	30	0.177711	15	7.73224	2			1.73207	6	4.1993	2			9.64478	2
2.09039	6	7.28616	22	8.414	30	8.05518	3	8.05276	30	0.239807	15	8.64049	2			1.91037	6	4.20589	2			9.65805	2
2.09502	6	7.65415	22	8.48338	30	8.15364	3			0.266512	15	8.79888	2			1.99381	6	4.35331	2			9.76307	2
2.10096	6	7.65755	22	9.93522	30	8.16094	3			0.302803	15	8.95334	2			2.0047	6	4.49339	2			9.80575	2
2.58593	6	7.66209	22			8.4198	3			0.323734	15	9.13344	2			2.15916	6	4.8581	2			0.216953	3
2.59072	6	8.40916	22			9.04293	3			0.515345	15	9.76455	2			2.2399	6	4.89579	2			0.224654	3
2.59576	6	8.41314	22			9.04608	3			0.793218	15	9.78262	2			2.26959	6	5.02641	2			0.237474	3
2.97689	6	8.41707	22			9.06431	3			1.20884	15	9.86405	2			2.29744	6	5.26312	2			0.245052	3
2.98746	6	1.89028	23			9.07168	3			1.40533	15	9.93511	2			2.32681	6	5.34307	2			0.25607	3
3.46132	6	1.89372	23			9.74892	3			2.0849	15	9.96354	2			2.37285	6	5.44838	2			0.290313	3
5.59158	6	1.89737	23			0.210497	4			2.15211	15	9.98017	2			3.30351	6	5.48254	2			0.754718	3
5.60169	6	1.90171	23			0.24134	4			2.1583	15	0.129836	3			3.33627	6	5.50158	2			0.878377	3
5.60677	6	3.87038	23			0.243265	4			2.17366	15	0.178988	3			3.36949	6	5.68197	2			0.989911	3
5.61316	6	3.87443	23			0.54297	4			2.19811	15	0.185828	3			3.66649	6	5.74124	2			1.09166	3
5.98787	6	3.88	23			0.55362	4			2.40287	15	0.192423	3			3.69738	6	5.83111	2			1.11038	3
5.99303	6	5.65144	23			0.634516	4			3.62209	15	0.222692	3			3.88428	6	5.87793	2			1.2145	3
7.10137	6	5.65443	23			0.660362	4			3.63941	15	0.271967	3			4.44416	6	6.04279	2			1.29683	3
7.40845	6	5.66095	23			0.724669	4			3.7027	15	0.332588	3			4.64003	6	6.05848	2			1.30444	3
7.41807	6	6.45201	23			1.64099	4			3.73223	15	0.747022	3			4.72277	6	6.47578	2			1.32275	3
7.91303	6	6.45524	23			1.69084	4			5.16682	15	0.893782	3			5.09375	6	6.52706	2			1.35052	3
8.0353	6	6.46254	23			1.78799	4			5.19725	15	0.979512	3			5.65892	6	6.61922	2			1.37817	3
8.04034	6	7.96798	23			1.98186	4			5.3368	15	1.0235	3			6.13115	6	7.277	2			2.18951	3
8.05295	6	7.97097	23			2.20718	4			6.56061	15	1.05062	3			6.43577	6	7.40136	2			2.30465	3
8.11304	6	7.97814	23			2.25523	4			6.63941	15	1.07216	3			6.63885	6	7.42159	2			2.3359	3
8.65302	6	8.87472	23			2.35468	4			6.96365	15	1.07974	3			7.1513	6	7.43502	2			2.52313	3
9.61652	6	8.87783	23			2.42161	4			7.06761	15	1.08699	3			7.6173	6	7.51613	2			2.71142	3
9.62107	6	8.88102	23			3.17101	4			7.1225	15	1.3008	3			7.70086	6	8.14482	2			3.07093	3
9.97668	6	8.88512	23			3.17498	4			7.859	15	1.32849	3			7.74989	6	8.17034	2			3.27577	3
0.822224	7	9.55977	23			3.17961	4			7.89738	15	1.40738	3			7.99221	6	8.20897	2			3.34303	3
0.875923	7	9.56514	23			3.19047	4			7.96636	15	1.57093	3			8.55631	6	8.2197	2			3.71495	3
0.879118	7	9.57014	23			3.43299	4			8.08678	15	1.58236	3			9.05136	6	8.25259	2			3.73956	3
0.883296	7	0.28911	24			3.69125	4			8.27352	15	2.07667	3			9.74657	6	8.33607	2			3.78917	3
0.889276	7	0.29251	24			3.79897	4			8.35716	15	2.28901	3			9.81596	6	8.34831	2			3.8853	3
1.95879	7	0.29591	24			4.83198	4			8.39115	15	2.40886	3			9.84893	6	8.35597	2			4.41799	3
1.96321	7	0.300047	24			4.83649	4			8.60419	15	2.46104	3			9.87809	6	8.99716	2			4.59284	3
1.96952	7	2.64235	24			4.84157	4			9.60787	15	2.47488	3			0.00257249	7	9.09985	2			5.76537	3
4.81502	7	2.64649	24			5.08819	4			0.330615	16	2.48107	3			0.0261246	7	9.59362	2			6.40213	3
4.81792	7	2.65021	24			5.42111	4			0.484297	16	2.49172	3			0.0887526	7	9.64478	2			6.58666	3
4.93593	7	2.65677	24			5.48067	4			0.563227	16	2.50466	3			0.174523	7	9.65805	2			6.65752	3
5.69074	7	3.43456	24			5.48477	4			0.726494	16	2.82055	3			0.312108	7	9.76307	2			7.57875	3
5.69668	7	3.43976	24			5.49095	4			0.970248	16	2.88506	3			0.346146	7	9.80575	2			8.03177	3
5.70057	7	3.44529	24			5.94143	4			1.24779	16	3.02666	3			0.371132	7	0.216953	3			8.44526	3
6.11742	7	3.45287	24			5.94786	4			2.0534	16	3.08818	3			0.394069	7	0.224654	3			9.87494	3
6.55181	7	6.75135	24			6.00389	4			2.20409	16	3.25403	3			0.425158	7	0.237474	3			0.0844473	4
6.55561	7	6.75454	24			6.056	4			2.45288	16	3.30605	3			0.451823	7	0.245052	3			0.889149	4
6.55926	7	6.76154	24			6.45876	4			3.492	16	3.34176	3			0.742394	7	0.25607	3			0.955505	4
6.56409	7	7.24631	24			6.63034	4			4.03685	16	3.37408	3			0.825461	7	0.290313	3			1.05209	4
6.57179	7	7.2504	24			7.01786	4			4.87567	16	3.41828	3			0.885795	7	0.754718	3			1.09665	4
6.88485	7	7.25458	24			7.56521	4			5.32701	16	3.48828	3			0.906849	7	0.878377	3			1.10935	4
6.90574	7	9.57538	24			7.56886	4			6.12921	16	3.49811	3			0.987335	7	0.989911	3			1.26565	4
7.47775	7	9.5798	24			7.57242	4			7.99683	16	3.50437	3			1.05451	7	1.09166	3			1.46787	4
7.48148	7	9.59459	24			7.57668	4			8.15809	16	3.59719	3			1.08498	7	1.11038	3			1.67575	4
8.70868	7	0.426368	25			7.59483	4			8.67902	16	3.63803	3			1.33988	7	1.2145	3			1.71781	4
8.71585	7	0.430546	25			7.60191	4			8.70544	16	3.82861	3			1.50294	7	1.29683	3			1.72842	4
8.7197	7	0.435215	25			7.66794	4			8.96582	16	3.84254	3			1.61103	7	1.30444	3			1.74014	4
8.72486	7	1.34953	25			7.98071	4			9.08047	16	3.85032	3			1.72396	7	1.32275	3			1.98864	4
1.56815	8	1.35051	25			8.08364	4			9.15739	16	4.17141	3			1.75599	7	1.35052	3			2.1515	4
1.57536	8	1.35375	25			8.15135	4			9.7883	16	4.35618	3			1.83554	7	1.37817	3			2.27983	4
1.5799	8	6.24422	25			8.30872	4			0.139249	17	4.60043	3			1.89706	7	2.18951	3			2.65965	4
1.58748	8	6.24741	25			8.5313	4			0.156698	17	4.7818	3			1.93749	7	2.30465	3			3.16215	4
2.60731	8	6.25065	25			9.25396	4			0.377351	17	5.21126	3			3.56553	7	2.3359	3			3.50134	4
2.96808	8	6.25528	25			9.2603	4			0.39611	17	5.24788	3			3.79527	7	2.52313	3			3.90537	4
2.97242	8	6.26163	25			9.26444	4			0.615861	17	5.40083	3			3.87551	7	2.71142	3			6.02088	4
3.41729	8	7.62896	25			9.27014	4			0.706997	17	5.44126	3			4.00585	7	3.07093	3			6.12893	4
4.27426	8	7.63264	25			9.41522	4			0.960049	17	5.60178	3			4.32739	7	3.27577	3			6.75193	4
4.28516	8	7.63637	25			9.53531	4			0.981758	17	5.84643	3			4.69357	7	3.34303	3			7.19737	4
5.53137	8	7.64313	25			9.98767	4			2.0586	17	5.85249	3			4.76652	7	3.71495	3			7.46194	4
5.53628	8	8.7384	25			9.99529	4			2.29363	17	5.9519	3			4.81031	7	3.73956	3			7.69041	4
5.54365	8	8.74188	25			0.119115	5			2.85843	17	6.42528	3			4.92172	7	3.78917	3			0.330249	5
5.85208	8	8.75012	25			0.243101	5			4.10841	17	6.78245	3			5.31694	7	3.8853	3			3.17345	5
6.97206	8	2.80099	26			0.255348	5			4.87461	17	6.83136	3			5.89829	7	4.41799	3			3.24583	5
6.97742	8	2.80537	26			0.435532	5			5.82218	17	6.86302	3			7.46001	7	4.59284	3			3.47398	5
6.97967	8	2.81348	26			0.513807	5			6.08207	17	6.92581	3			8.83128	7	5.76537	3			3.55127	5
6.98713	8	7.30017	26			0.583521	5			7.63294	17	7.42524	3			9.5806	7	6.40213	3			3.66346	5
7.35442	8	7.30418	26			0.820516	5			7.73178	17	8.32608	3			0.00150753	8	6.58666	3			3.82431	5
9.59236	8	7.31721	26			2.58266	5			8.01997	17	8.62922	3			0.287122	8	6.65752	3			3.9811	5
9.59707	8	7.88234	26			2.58807	5			8.77495	17	8.75542	3			0.395912	8	7.37887	3			4.2156	5
0.255664	9	7.88561	26			2.5936	5			9.58727	17	8.81252	3			0.64196	8	7.38096	3			5.39558	5
1.08502	9	7.88913	26			2.8199	5			9.8189	17	9.02146	3			1.043	8	7.57875	3			7.6454	5
1.08998	9	7.90224	26			4.26121	5			0.187992	18	9.15761	3			1.76951	8	8.03177	3			7.69062	5
1.60235	9	9.875	26			4.26563	5			0.611642	18	9.2716	3			2.3903	8	8.44526	3			7.97959	5
1.61386	9	9.87832	26			4.33092	5			0.624299	18	9.43056	3			2.41291	8	9.87494	3			8.10669	5
1.89935	9	9.88184	26			5.45151	5			1.36994	18	9.52588	3			2.77799	8	0.0844473	4			8.76651	5
2.46771	9	9.88606	26			5.45491	5			3.11541	18	9.58298	3			2.8953	8	0.889149	4			8.97779	5
2.47185	9	9.89233	26			5.45822	5			3.149	18	9.62873	3			2.98828	8	0.955505	4			9.78732	5
2.47726	9	0.52971	27			5.46228	5			3.15539	18	9.67141	3			3.55635	8	1.05209	4			9.84471	5
3.18878	9	0.532987	27			5.54768	5			4.02026	18	0.275981	4			4.14995	8	1.09665	4			9.93478	5
3.1939	9	0.536386	27			6.44549	5			4.19897	18	0.276882	4			4.1855	8	1.10935	4			9.97152	5
3.26328	9	0.54081	27			6.4547	5			4.44952	18	0.398411	4			4.22335	8	1.26565	4			0.148755	6
3.49553	9	8.59332	27			6.45892	5			5.13872	18	0.407545	4			4.30076	8	1.46787	4			0.202126	6
3.59027	9	8.59799	27			6.46437	5			5.59333	18	0.708315	4			5.27688	8	1.67575	4			0.860928	6
4.10849	9	1.61831	28			7.01778	5			6.63327	18	0.750135	4			5.29388	8	1.71781	4			2.61345	6
4.91897	9	1.6222	28			7.02106	5			8.62217	18	0.789498	4			5.3638	8	1.72842	4			7.34143	6
5.06434	9	1.62605	28			7.02511	5			0.01342	19	0.980126	4			5.92426	8	1.74014	4			8.72797	6
5.83664	9	1.6315	28			7.02941	5			0.257829	19	1.03862	4			5.93245	8	1.98864	4			9.14273	6
5.83984	9	1.63875	28			7.03801	5			0.360639	19	1.13106	4			6.36413	8	2.1515	4			0.124834	7
5.84328	9	3.85198	28			7.51602	5			0.913846	19	1.1429	4			7.55742	8	2.27983	4			0.803215	7
5.85737	9	3.85776	28			7.60863	5			1.06663	19	1.15671	4			9.27172	8	2.65965	4			0.830249	7
5.88567	9	3.8646	28			7.61682	5			1.1628	19	1.18394	4			9.37715	8	3.16215	4			0.919378	7
6.5543	9	4.89376	28			7.73749	5			1.18095	19	1.19963	4			9.54312	8	3.50134	4			0.958905	7
6.55795	9	4.89675	28			7.87225	5			1.2174	19	1.31764	4			9.71458	8	3.90537	4			0.994949	7
6.56164	9	4.90064	28			8.57852	5			1.74517	19	1.38223	4			9.98873	8	6.02088	4			1.01428	7
6.56803	9	4.91097	28			8.58192	5			1.8728	19	1.39444	4			0.0819122	9	6.12893	4			1.30944	7
6.90513	9	5.21591	28			8.59053	5			2.06585	19	1.57814	4			0.0943641	9	6.75193	4			1.46304	7
8.71343	9	5.21985	28			9.38384	5			4.29523	19	2.00691	4			0.171983	9	7.19737	4			1.48967	7
8.71737	9	5.22435	28			9.38851	5			4.6653	19	2.60264	4			0.385549	9	7.46194	4			1.509	7
8.7215	9	8.2595	28			9.39392	5			4.73604	19	2.62185	4			0.540665	9	7.69041	4			1.57118	7
8.72716	9	8.26331	28			9.41206	5			4.83254	19	2.81919	4			0.68976	9	0.330249	5			2.1891	7
8.76078	9	8.26699	28			0.447124	6			6.33819	19	2.98545	4			0.733178	9	3.17345	5			2.53976	7
9.67723	9	8.27252	28			0.457855	6			6.35167	19	3.00794	4			0.746121	9	3.24583	5			2.61455	7
9.68017	9	9.59537	28			0.464737	6			6.36826	19	3.02338	4			0.80195	9	3.47398	5			2.8067	7
9.68325	9	9.6002	28			0.788403	6			6.63331	19	3.10288	4			0.843524	9	3.55127	5			2.96345	7
0.390013	10	9.60483	28			0.804951	6			6.70536	19	3.25222	4			1.00646	9	3.66346	5			3.2183	7
1.35974	10	2.16955	29			0.934098	6			6.85974	19	3.30433	4			1.32083	9	3.82431	5			3.8307	7
1.36425	10	2.17307	29			2.57942	6			7.35339	19	3.32333	4			1.44023	9	3.9811	5			4.00113	7
1.37486	10	2.17655	29			2.58262	6			7.35982	19	3.33849	4			1.46817	9	4.2156	5			4.19197	7
2.27274	10	2.18102	29			2.5904	6			7.79318	19	3.78233	4			1.52674	9	5.39558	5			4.23129	7
2.4474	10	6.62658	29			2.59663	6			7.82844	19	4.06807	4			1.59039	9	7.6454	5			4.95391	7
2.45039	10	6.63035	29			2.77722	6			8.59079	19	4.33902	4			2.12828	9	7.69062	5			4.97844	7
2.45776	10	6.63428	29			2.78836	6			9.16063	19	4.6882	4			3.92417	9	7.97959	5			4.99687	7
2.46436	10	6.64518	29			3.34751	6			9.24185	19	4.70557	4			4.73498	9	8.10669	5			5.65433	7
3.37383	10	1.09947	30			3.67748	6			0.178162	20	4.88715	4			4.8271	9	8.76651	5			5.69869	7
3.43941	10	1.10315	30			3.68068	6			0.333318	20	5.07667	4			5.09559	9	8.97779	5			5.81325	7
3.79089	10	1.10696	30			3.68842	6			2.63585	20	5.85397	4			5.25538	9	9.78732	5			6.24677	7
3.83025	10	4.99203	30			4.25572	6			2.64744	20	5.91385	4			5.44633	9	9.84471	5			6.45849	7
4.23051	10	4.99702	30			4.76428	6			2.65703	20	6.82808	4			5.64343	9	9.93478	5			7.88772	7
4.98066	10	5.0021	30			4.76772	6			4.21679	20	6.83341	4			5.9952	9	9.97152	5			8.21912	7
5.59879	10	8.42121	30			4.77116	6			4.22563	20	6.8432	4			6.22511	9	0.148755	6			8.31071	7
6.37928	10	8.42584	30			4.77542	6			4.24083	20	6.8518	4			6.56844	9	0.202126	6			8.45141	7
6.49483	10	8.99657	30			4.78099	6			5.18902	20	6.96395	4			6.71548	9	0.860928	6			8.8137	7
7.21032	10	9.00104	30			4.79262	6			5.71314	20	7.00237	4			6.8056	9	2.61345	6			9.12401	7
7.99696	10	9.00583	30			5.45917	6			5.82562	20	7.0387	4			6.85733	9	7.34143	6			9.78204	7
8.00364	10	9.01505	30			5.69387	6			6.65932	20	7.16752	4			6.9073	9	8.72797	6			0.0551608	8
8.00839	10					5.87356	6			6.66546	20	7.2179	4			7.10489	9	9.14273	6			0.134132	8
8.01711	10					6.6321	6			6.76078	20	7.56577	4			7.31506	9	0.124834	7			0.224818	8
8.64884	10					6.63943	6			7.59874	20	8.31624	4			7.40869	9	0.803215	7			0.511088	8
8.68169	10					7.98853	6			7.6055	20	8.83255	4			7.79925	9	0.830249	7			0.725842	8
8.68464	10					7.99865	6			7.61492	20	8.93978	4			7.86556	9	0.919378	7			0.865556	8
8.69213	10					8.74175	6			7.66759	20	9.0285	4			8.4943	9	0.958905	7			0.88149	8
8.70086	10					9.82699	6			7.71531	20	9.03403	4			9.3679	9	0.994949	7			0.894392	8
9.10206	10					0.192229	7			9.25328	20	9.19222	4			9.62234	9	1.01428	7			0.901888	8
9.65724	10					0.341324	7			9.78003	20	9.29011	4			9.72638	9	1.30944	7			0.909793	8
9.75489	10					2.13198	7			9.82091	20	9.3733	4			0.100139	10	1.46304	7			1.16239	8
0.195394	11					2.57193	7			0.0468844	21	9.39067	4			0.173704	10	1.48967	7			1.20024	8
0.382868	11					2.57455	7			0.24677	21	9.68865	4			0.224494	10	1.509	7			1.20979	8
0.422272	11					2.58569	7			0.30608	21	9.75538	4			0.231048	10	1.57118	7			1.2206	8
0.441236	11					3.35308	7			0.329427	21	9.78741	4			0.346392	10	2.1891	7			1.22908	8
0.561413	11					3.35713	7			0.569904	21	9.80392	4			0.413894	10	2.53976	7			1.24354	8
0.682327	11					3.3616	7			0.621227	21	9.93487	4			1.08781	10	2.61455	7			1.65039	8
0.915349	11					3.36848	7			0.73399	21	0.0443518	5			1.46022	10	2.8067	7			1.79654	8
1.02934	11					4.04563	7			0.926011	21	0.0955929	5			1.64438	10	2.96345	7			1.93928	8
1.22415	11					4.19489	7			1.05684	21	0.130655	5			2.04202	10	3.2183	7			2.08441	8
1.28755	11					4.57947	7			1.12106	21	0.188122	5			2.13315	10	3.8307	7			2.23211	8
1.39872	11					5.33624	7			1.25017	21	0.189351	5			3.23621	10	4.00113	7			2.26824	8
1.41535	11					5.84046	7			1.75046	21	0.277742	5			4.01437	10	4.19197	7			2.32877	8
1.46471	11					6.33313	7			1.8529	21	0.345368	5			4.35184	10	4.23129	7			2.34942	8
1.47601	11					6.33694	7			3.31956	21	0.582609	5			5.10182	10	4.95391	7			2.41291	8
1.48195	11					6.34116	7			4.7301	21	0.699918	5			5.18562	10	4.97844	7			2.53173	8
1.5028	11					6.34636	7			5.54975	21	0.950553	5			5.4866	10	4.99687	7			2.54975	8
1.50911	11					6.99255	7			6.86748	21	0.987376	5			5.79822	10	5.65433	7			2.62799	8
1.67921	11					7.24884	7			7.57158	21	1.0106	5			6.01507	10	5.69869	7			2.67231	8
1.704	11					7.62321	7			7.58272	21	1.17907	5			6.03735	10	5.81325	7			2.70131	8
1.71186	11					8.68776	7			7.59075	21	1.30011	5			6.50143	10	6.24677	7			3.01944	8
1.73152	11					8.69387	7			7.97676	21	1.50478	5			6.52571	10	6.45849	7			3.03685	8
1.93046	11					8.69952	7			7.98987	21	2.30965	5			6.70709	10	7.86801	7			3.10714	8
1.96958	11					8.70788	7			8.0076	21	2.33931	5			6.98115	10	7.87248	7			3.22535	8
2.31377	11					8.90346	7			8.03636	21	2.45797	5			8.11001	10	7.8794	7			3.38489	8
2.47425	11					0.0851183	8			8.42376	21	2.59535	5			8.12541	10	7.88772	7			3.53349	8
2.71186	11					0.528634	8			8.57302	21	2.93761	5			8.15752	10	8.21912	7			3.66194	8
2.79493	11					1.24421	8			0.194095	22	3.52518	5			8.18329	10	8.31071	7			4.28491	8
2.94832	11					1.26428	8			0.286952	22	3.65937	5			8.21315	10	8.45141	7			4.53144	8
3.02549	11					1.30466	8			0.392547	22	3.78397	5			8.86167	10	8.8137	7			5.95141	8
4.30001	11					2.01278	8			0.506252	22	4.0346	5			8.86867	10	9.12401	7			6.0158	8
4.57092	11					2.01774	8			0.842493	22	4.1003	5			8.89046	10	9.78204	7			6.62254	8
5.29931	11					2.02278	8			1.52563	22	4.56295	5			8.92962	10	0.0551608	8			6.70983	8
6.31594	11					2.06689	8			1.92224	22	5.85991	5			9.26492	10	0.134132	8			7.01432	8
6.41686	11					2.86643	8			2.23661	22	5.86278	5			9.53333	10	0.224818	8			7.09137	8
6.42223	11					2.88433	8			2.54963	22	5.86568	5			9.63151	10	0.511088	8			7.16403	8
7.05683	11					3.73794	8			4.89255	22	5.87461	5			0.0333335	11	0.725842	8			7.43236	8
7.06354	11					3.74294	8			5.34835	22	5.8801	5			0.0682315	11	0.865556	8			7.87334	8
7.06731	11					3.7497	8			6.45976	22	5.891	5			0.0778162	11	0.88149	8			8.05496	8
7.07231	11					3.87041	8			7.19487	22	6.82436	5			0.0843289	11	0.894392	8			8.12041	8
7.09791	11					4.70345	8			7.4485	22	6.87302	5			0.182387	11	0.901888	8			8.29183	8
7.40343	11					5.02077	8			8.34786	22	6.87793	5			0.273237	11	0.909793	8			8.38935	8
8.08517	11					5.02392	8			8.3921	22	6.89386	5			0.637085	11	1.16239	8			8.48369	8
8.08869	11					5.02732	8			8.40471	22	7.22732	5			0.813501	11	1.20024	8			8.72809	8
8.09262	11					5.04088	8			0.126552	23	7.25329	5			1.00716	11	1.20979	8			9.80084	8
8.09746	11					5.46384	8			0.153995	23	7.28839	5			1.09559	11	1.2206	8			9.84565	8
8.26216	11					5.69821	8			0.162965	23	7.33713	5			1.31878	11	1.22908	8			0.188117	9
8.49547	11					5.70222	8			0.404138	23	7.5124	5			1.34541	11	1.24354	8			0.205894	9
8.55212	11					5.7159	8			0.432811	23	7.94216	5			1.64012	11	1.65039	8			0.334959	9
8.70051	11					5.72627	8			0.483642	23	8.04206	5			1.99233	11	1.79654	8			0.501585	9
9.4482	11					6.14414	8			0.64441	23	8.21131	5			2.02989	11	1.93928	8			0.743045	9
9.45205	11					7.72303	8			0.685985	23	8.29515	5			2.87498	11	2.08441	8			0.801904	9
9.4559	11					7.72987	8			1.03259	23	8.77016	5			4.50937	11	2.23211	8			0.841103	9
9.46077	11					7.73343	8			1.11303	23	8.84098	5			4.74534	11	2.26824	8			0.852695	9
9.46938	11					7.74265	8			1.14662	23	9.42336	5			4.75837	11	2.32877	8			0.871905	9
9.52713	11					7.75027	8			1.26434	23	9.53505	5			4.76521	11	2.34942	8			0.880302	9
0.0412198	12					7.75531	8			1.38722	23	9.77438	5			4.77201	11	2.41291	8			0.906517	9
0.0806234	12					8.13062	8			1.44743	23	9.82358	5			4.78745	11	2.53173	8			1.06008	9
0.114252	12					8.80565	8			1.46767	23	0.172393	6			5.9515	11	2.54975	8			1.17198	9
0.232913	12					9.3222	8			1.56245	23	0.26525	6			6.18521	11	2.62799	8			1.2319	9
2.31881	12					9.32682	8			1.72248	23	0.439781	6			7.87375	11	2.67231	8			1.30645	9
2.32159	12					9.33301	8			1.78449	23	0.585312	6			8.79613	11	2.70131	8			1.31772	9
2.33224	12					9.66458	8			2.93953	23	0.667928	6			8.80691	11	3.01944	8			1.32873	9
2.33978	12					9.86529	8			3.05516	23	0.806537	6			8.81399	11	3.03685	8			1.36371	9
3.07546	12					9.88007	8			3.18078	23	0.82116	6			9.7655	11	3.10714	8			1.37272	9
3.07837	12					0.56599	9			3.46185	23	0.83095	6			9.99074	11	3.22535	8			1.39845	9
3.09021	12					1.07361	9			4.41147	23	0.835742	6			0.16928	12	3.38489	8			1.4621	9
3.09525	12					1.07803	9			5.88775	23	0.846105	6			0.332015	12	3.53349	8			1.75587	9
3.4856	12					1.08254	9			6.42962	23	1.13238	6			0.530753	12	3.66194	8			1.86162	9
3.48871	12					1.34763	9			7.3728	23	1.47345	6			1.31428	12	4.28491	8			1.9664	9
3.49289	12					1.90391	9			7.42142	23	1.48557	6			1.44601	12	4.53144	8			2.14236	9
3.49874	12					1.91485	9			7.47172	23	1.49672	6			1.61464	12	5.66592	8			2.18554	9
3.51374	12					2.04277	9			7.84122	23	1.50921	6			1.64458	12	5.66887	8			2.30584	9
4.57718	12					2.2354	9			9.53877	23	1.5582	6			1.65822	12	5.67194	8			2.46386	9
4.58034	12					3.63951	9			9.54996	23	1.69783	6			1.71528	12	5.68255	8			2.5099	9
4.58374	12					3.64664	9			1.10345	24	1.73207	6			1.94117	12	5.95141	8			2.53546	9
4.58824	12					3.65201	9			1.9195	24	1.91037	6			2.00011	12	6.0158	8			2.54701	9
4.59389	12					3.66249	9			1.92642	24	1.99381	6			2.05664	12	6.62254	8			2.58637	9
4.60803	12					4.1559	9			1.94141	24	2.0047	6			3.09453	12	6.70983	8			2.69549	9
5.38234	12					4.17933	9			2.03091	24	2.15916	6			3.10063	12	7.01432	8			3.05061	9
5.39966	12					4.50602	9			2.21052	24	2.2399	6			3.10792	12	7.09137	8			3.12959	9
5.44206	12					5.12763	9			2.39443	24	2.26959	6			4.5063	12	7.16403	8			3.21257	9
5.46794	12					5.21648	9			2.77151	24	2.29744	6			4.52252	12	7.43236	8			3.23145	9
6.29931	12					5.22324	9			2.8085	24	2.32681	6			6.75124	12	7.87334	8			3.34037	9
6.3025	12					5.61006	9			2.93883	24	2.37285	6			8.54824	12	8.05496	8			3.38571	9
6.30607	12					5.94643	9			3.85036	24	3.2548	6			8.55639	12	8.12041	8			3.40303	9
6.31016	12					6.61334	9			4.27642	24	3.25984	6			8.56405	12	8.29183	8			3.43892	9
6.31877	12					7.43029	9			4.99142	24	3.26504	6			0.154207	13	8.38935	8			5.01105	9
7.12482	12					7.43492	9			5.42441	24	3.30351	6			0.190702	13	8.48369	8			5.02686	9
7.12789	12					7.78517	9			6.60148	24	3.33627	6			0.226215	13	8.72809	8			5.04443	9
7.13965	12					7.85378	9			8.02989	24	3.36949	6			0.283231	13	9.80084	8			5.1918	9
7.1512	12					8.82527	9			8.07011	24	3.66649	6			0.53448	13	9.84565	8			5.32607	9
7.87656	12					9.49087	9			8.18955	24	3.69738	6			0.642861	13	0.188117	9			5.41999	9
7.8793	12					0.259754	10			8.28904	24	3.88428	6			1.13991	13	0.205894	9			5.48176	9
7.88578	12					0.281627	10			9.60271	24	4.44416	6			1.23531	13	0.23645	9			5.87617	9
8.13723	12					0.473934	10			9.61099	24	4.64003	6			1.33611	13	0.239891	9			5.95661	9
8.2368	12					1.00695	10			0.154036	25	4.72277	6			1.64126	13	0.250581	9			6.03427	9
8.24111	12					1.05045	10			0.324184	25	5.09375	6			3.24321	13	0.334959	9			6.07044	9
8.24836	12					1.31272	10			4.10808	25	5.65892	6			4.0022	13	0.501585	9			6.48524	9
8.57669	12					2.05385	10			5.08961	25	6.13115	6			4.01289	13	0.743045	9			7.30788	9
8.5814	12					2.09141	10			5.77077	25	6.43577	6			4.02539	13	0.801904	9			7.66063	9
8.5866	12					2.10574	10			5.77704	25	6.63885	6			4.11243	13	0.841103	9			7.67509	9
8.66574	12					2.97889	10			7.09784	25	7.1513	6			4.23469	13	0.852695	9			7.71568	9
0.248887	13					2.99106	10			7.10402	25	7.6173	6			4.28626	13	0.871905	9			7.80977	9
0.531348	13					3.99335	10			7.11119	25	7.70086	6			5.46124	13	0.880302	9			8.78613	9
1.12007	13					3.9972	10			7.12975	25	7.74989	6			5.59641	13	0.906517	9			8.94928	9
1.12457	13					4.00658	10			8.44448	25	7.99221	6			5.8273	13	1.06008	9			8.9689	9
1.12932	13					4.10165	10			9.83557	25	8.55631	6			6.11579	13	1.17198	9			9.03693	9
1.13678	13					4.49265	10			9.85171	25	9.05136	6			6.46829	13	1.2319	9			9.22146	9
1.14706	13					4.60816	10			9.88046	25	9.74657	6			7.27447	13	1.30645	9			9.31898	9
1.68958	13					4.67108	10			0.0508575	26	9.81596	6			7.579	13	1.31772	9			9.94674	9
2.38639	13					4.74656	10			0.683282	26	9.84893	6			7.7272	13	1.32873	9			0.151909	10
2.39016	13					5.23256	10			1.8477	26	9.87809	6			7.75866	13	1.36371	9			0.176567	10
2.39413	13					5.24366	10			2.37858	26	0.00257249	7			9.11116	13	1.37272	9			0.270734	10
2.39917	13					5.43338	10			2.3853	26	0.0261246	7			9.29724	13	1.39845	9			0.285848	10
2.40544	13					5.52427	10			3.28105	26	0.0887526	7			0.138765	14	1.4621	9			0.293221	10
2.41084	13					6.14801	10			4.24341	26	0.174523	7			0.548284	14	1.75587	9			0.331027	10
2.42899	13					6.15465	10			5.02198	26	0.312108	7			0.620538	14	1.86162	9			0.679065	10
2.63903	13					6.15846	10			7.00539	26	0.346146	7			0.709585	14	1.9664	9			0.71253	10
2.73754	13					6.71179	10			8.85302	26	0.371132	7			0.821447	14	2.14236	9			0.892508	10
2.88492	13					7.30637	10			1.04226	27	0.394069	7			1.08945	14	2.18554	9			0.906517	10
2.92244	13					8.04758	10			1.05332	27	0.425158	7			1.22679	14	2.30584	9			0.959109	10
2.96696	13					8.51481	10			1.10886	27	0.451823	7			1.26861	14	2.46386	9			1.04357	10
3.29472	13					8.51825	10			1.17304	27	0.742394	7			1.42733	14	2.5099	9			1.20999	10
4.13449	13					8.52223	10			1.36453	27	0.825461	7			1.51703	14	2.53546	9			1.43027	10
4.16816	13					8.52726	10			2.5765	27	0.885795	7			2.12984	14	2.54701	9			1.54668	10
4.18122	13					8.53468	10			3.02161	27	0.906849	7			2.15048	14	2.58637	9			1.65482	10
4.26195	13					9.00007	10			3.56409	27	0.987335	7			2.49209	14	2.69549	9			1.7045	10
4.51619	13					9.00429	10			3.73809	27	1.05451	7			3.4107	14	3.05061	9			1.91475	10
4.76498	13					9.00924	10			4.67448	27	1.08498	7			3.41979	14	3.12959	9			1.97218	10
4.8082	13					9.01924	10			4.68574	27	1.33988	7			3.72343	14	3.21257	9			2.01887	10
4.90208	13					9.02898	10			5.86674	27	1.50294	7			4.0208	14	3.23145	9			2.02743	10
5.12666	13					9.42482	10			6.84081	27	1.61103	7			4.85675	14	3.34037	9			2.04152	10
7.5701	13					9.95718	10			7.30338	27	1.72396	7			5.41578	14	3.38571	9			2.06913	10
7.57305	13					0.000271811	11			8.15203	27	1.75599	7			5.87682	14	3.40303	9			2.15953	10
7.57604	13					0.00416302	11			8.55245	27	1.83554	7			6.3065	14	3.43892	9			2.32742	10
7.57964	13					0.00842287	11			0.371166	28	1.89706	7			7.52096	14	5.01105	9			2.45436	10
7.59004	13					0.0135019	11			0.388328	28	1.93749	7			7.60194	14	5.02686	9			2.53022	10
8.66742	13					0.0231685	11			0.737062	28	3.514	7			7.94875	14	5.04443	9			2.59305	10
8.67704	13					0.128436	11			1.52747	28	3.51826	7			9.9365	14	5.1918	9			2.64265	10
8.68151	13					0.185248	11			2.39824	28	3.52313	7			9.9433	14	5.32607	9			2.96845	10
8.68876	13					0.356133	11			2.78302	28	3.56553	7			9.95051	14	5.41999	9			3.05524	10
8.69875	13					0.4025	11			2.94784	28	3.79527	7			9.96178	14	5.48176	9			3.11377	10
8.71325	13					0.463244	11			2.95485	28	3.87551	7			0.183698	15	5.87617	9			3.34573	10
8.79976	13					0.547499	11			2.96943	28	4.00585	7			0.203031	15	5.95661	9			3.55958	10
9.14022	13					0.656535	11			3.13098	28	4.32739	7			0.862448	15	6.03427	9			3.61799	10
9.14706	13					0.72375	11			4.47688	28	4.69357	7			1.21126	15	6.07044	9			5.80149	10
0.237296	14					0.877678	11			4.75865	28	4.76652	7			1.43974	15	6.48524	9			6.17165	10
0.24004	14					1.33893	11			5.11549	28	4.81031	7			1.60698	15	7.30788	9			6.49474	10
0.242866	14					1.37923	11			5.44297	28	4.92172	7			1.66584	15	7.63634	9			6.65924	10
0.304839	14					2.08801	11			5.91925	28	5.31694	7			1.78798	15	7.6406	9			6.77442	10
1.21198	14					2.09174	11			6.9569	28	5.89829	7			3.55504	15	7.65281	9			7.16162	10
1.21628	14					2.09591	11			8.96759	28	7.46001	7			3.56901	15	7.66063	9			7.23121	10
1.22087	14					2.10165	11			8.98139	28	8.23969	7			3.94957	15	7.67509	9			7.30395	10
1.22796	14					2.10828	11			9.88517	28	8.24313	7			3.95993	15	7.71568	9			7.31333	10
1.23631	14					2.11832	11			2.21992	29	8.24678	7			4.5797	15	7.80977	9			8.96919	10
2.13707	14					2.34208	11			2.23496	29	8.25435	7			6.06061	15	8.78613	9			9.25808	10
2.14034	14					2.44838	11			2.4194	29	8.83128	7			6.35245	15	8.94928	9			9.30752	10
2.14358	14					3.16895	11			4.69825	29	9.55668	7			7.65122	15	8.9689	9			9.3366	10
2.14808	14					3.34229	11			6.64013	29	9.56041	7			8.43093	15	9.03693	9			9.42139	10
2.39528	14					3.3506	11			6.76322	29	9.56803	7			8.62406	15	9.22146	9			9.52653	10
2.77338	14					3.5081	11			7.68404	29	9.5806	7			9.84733	15	9.31898	9			9.67255	10
2.79874	14					3.52522	11			8.10605	29	0.00150753	8			0.233301	16	9.94674	9			9.73104	10
3.39147	14					3.5665	11			9.27497	29	0.287122	8			0.249521	16	0.151909	10			0.125407	11
3.39888	14					4.60796	11			9.42771	29	0.395912	8			0.467142	16	0.176567	10			0.135729	11
3.40425	14					4.61119	11			9.8616	29	0.64196	8			0.699918	16	0.270734	10			0.278721	11
3.87742	14					4.62737	11			0.977275	30	1.043	8			0.79257	16	0.285848	10			0.291173	11
3.88184	14					4.68041	11			1.03515	30	1.76951	8			0.93122	16	0.293221	10			0.31579	11
3.89155	14					4.73526	11			1.55444	30	2.3903	8			1.16379	16	0.331027	10			0.843971	11
3.91605	14					4.88173	11			2.93492	30	2.41291	8			1.20504	16	0.679065	10			0.90582	11
3.92354	14					4.99446	11			3.09381	30	2.75308	8			1.25497	16	0.71253	10			1.00675	11
4.51247	14					5.06884	11			3.10269	30	2.75706	8			1.3878	16	0.892508	10			1.08097	11
4.52402	14					6.166	11			3.33228	30	2.76836	8			1.39509	16	0.906517	10			1.13356	11
4.6471	14					6.16972	11			3.62375	30	2.77799	8			1.55578	16	0.959109	10			1.37948	11
4.86325	14					6.72682	11			3.7506	30	2.8953	8			2.24874	16	1.04357	10			1.41352	11
4.86648	14					6.81997	11			3.90928	30	2.98828	8			2.69033	16	1.20999	10			1.66444	11
4.86988	14					6.90602	11			4.06411	30	3.55635	8			2.87531	16	1.43027	10			1.68865	11
4.87435	14					8.3513	11			6.11842	30	4.14995	8			4.00532	16	1.54668	10			1.72293	11
4.90622	14					8.54	11			6.61138	30	4.1855	8			4.17989	16	1.65482	10			1.77028	11
5.36358	14					8.54398	11			6.94299	30	4.22335	8			4.78208	16	1.7045	10			1.79269	11
5.64903	14					8.54811	11			7.21931	30	4.30076	8			5.845	16	1.91475	10			1.80838	11
6.93325	14					8.55405	11			8.48321	30	5.27688	8			5.87252	16	1.97218	10			1.81702	11
7.40613	14					8.65096	11			9.61425	30	5.29388	8			5.98344	16	2.01887	10			1.97746	11
7.41383	14					9.28314	11			9.99223	30	5.3638	8			7.44113	16	2.02743	10			2.05315	11
7.4244	14					9.34851	11					5.92426	8			7.66113	16	2.04152	10			2.11087	11
7.98588	14					9.7235	11					5.93245	8			8.79151	16	2.06913	10			2.12438	11
8.85149	14					0.176236	12					6.36413	8			0.199713	17	2.15953	10			2.4562	11
8.85571	14					0.190818	12					7.55742	8			0.226993	17	2.32742	10			2.85896	11
8.86022	14					0.349539	12					9.10952	8			0.242271	17	2.45436	10			2.9372	11
8.87468	14					0.44006	12					9.1155	8			0.270124	17	2.53022	10			3.00576	11
0.217307	15					0.47504	12					9.11919	8			0.282043	17	2.59305	10			3.32644	11
1.24713	15					0.829919	12					9.27172	8			0.717818	17	2.64265	10			3.40226	11
2.45119	15					1.57715	12					9.37715	8			0.826034	17	2.96845	10			3.71417	11
2.45443	15					1.83545	12					9.54312	8			0.937282	17	3.05524	10			3.76213	11
2.45787	15					1.84065	12					9.71458	8			1.4331	17	3.11377	10			3.78532	11
2.46237	15					1.84659	12					9.98873	8			1.57233	17	3.34573	10			4.08015	11
2.4677	15					1.88276	12					0.0819122	9			2.84516	17	3.55958	10			4.32542	11
2.47278	15					2.02321	12					0.0943641	9			4.63029	17	3.61799	10			4.40394	11
3.07014	15					2.05647	12					0.171983	9			4.64122	17	5.80149	10			4.51592	11
4.38213	15					2.23096	12					0.385549	9			4.65585	17	6.17165	10			4.65338	11
4.38565	15					2.28974	12					0.540665	9			4.66645	17	6.49474	10			5.40365	11
5.10528	15					2.43789	12					0.68976	9			4.72486	17	6.65924	10			5.9016	11
5.11224	15					2.54922	12					0.733178	9			5.05836	17	6.77442	10			5.92417	11
5.11831	15					2.83623	12					0.746121	9			5.72667	17	7.16162	10			5.95399	11
5.12666	15					2.95075	12					0.80195	9			5.80007	17	7.23121	10			6.05659	11
6.03106	15					3.11893	12					0.843524	9			5.93179	17	7.30395	10			6.0706	11
6.94455	15					3.43859	12					1.00646	9			6.14638	17	7.31333	10			6.15985	11
8.86042	15					3.47983	12					1.32083	9			6.47329	17	8.96919	10			6.85409	11
9.10897	15					3.48729	12					1.44023	9			7.71634	17	9.25808	10			6.93441	11
9.16885	15					3.4965	12					1.46817	9			8.22994	17	9.30752	10			6.94907	11
9.92629	15					3.6313	12					1.52674	9			0.127419	18	9.3366	10			7.17595	11
9.9842	15					3.63577	12					1.59039	9			0.156378	18	9.42139	10			7.65936	11
9.98842	15					3.80116	12					2.12828	9			0.460875	18	9.52653	10			7.71949	11
9.99268	15					3.94211	12					3.92417	9			0.553732	18	9.67255	10			7.73928	11
9.99788	15					4.97946	12					4.73498	9			0.911723	18	9.73104	10			7.76217	11
0.0893479	16					5.75443	12					4.8271	9			1.09051	18	0.125407	11			7.77012	11
0.092256	16					5.98655	12					5.09559	9			1.15052	18	0.135729	11			8.08617	11
0.0992602	16					6.63872	12					5.25538	9			1.19009	18	0.278721	11			8.33414	11
0.167336	16					6.64306	12					5.44633	9			1.26279	18	0.291173	11			9.1182	11
0.484367	16					6.86891	12					5.64343	9			1.29593	18	0.31579	11			0.0408657	12
0.491248	16					6.97553	12					5.9952	9			1.5423	18	0.843971	11			0.194835	12
0.496	16					7.56302	12					6.22511	9			1.67444	18	0.90582	11			0.289207	12
0.501325	16					7.569	12					6.56844	9			1.70758	18	1.00675	11			0.806615	12
0.875208	16					7.95235	12					6.71548	9			2.10116	18	1.08097	11			0.895048	12
0.878526	16					8.16591	12					6.8056	9			3.08548	18	1.13356	11			0.906558	12
0.886841	16					8.88276	12					6.85733	9			3.32358	18	1.37948	11			1.25103	12
2.55171	16					8.92601	12					6.9073	9			5.20344	18	1.41352	11			1.46931	12
2.55535	16					9.90758	12					7.10489	9			6.137	18	1.66444	11			1.82779	12
2.55953	16					9.91155	12					7.31506	9			6.14728	18	1.68865	11			1.87137	12
2.56522	16					9.91548	12					7.40869	9			7.4732	18	1.72293	11			1.90578	12
2.57464	16					9.92781	12					7.79925	9			7.63213	18	1.77028	11			2.49434	12
2.97663	16					9.98135	12					7.86556	9			7.86101	18	1.79269	11			2.71486	12
3.64317	16					0.25701	13					8.4943	9			8.09436	18	1.80838	11			3.0894	12
3.78719	16					0.296618	13					9.21524	9			8.12705	18	1.81702	11			3.24321	12
3.7905	16					0.416304	13					9.21843	9			8.1959	18	1.97746	11			3.5704	12
3.79374	16					1.07154	13					9.22265	9			9.53088	18	2.05315	11			3.7564	12
4.35071	16					1.19094	13					9.3679	9			9.55013	18	2.11087	11			5.10112	12
4.35387	16					2.45829	13					9.62234	9			0.201188	19	2.12438	11			5.17411	12
4.37091	16					2.49908	13					9.72638	9			0.619309	19	2.4562	11			5.29388	12
5.05883	16					3.17103	13					0.100139	10			0.632867	19	2.85896	11			5.49929	12
5.0619	16					3.17738	13					0.173704	10			1.09518	19	2.9372	11			5.57191	12
5.06518	16					3.18181	13					0.224494	10			1.24735	19	3.00576	11			5.77045	12
5.07464	16					3.19737	13					0.231048	10			1.26853	19	3.32644	11			5.79572	12
5.29878	16					3.23063	13					0.346392	10			1.54198	19	3.40226	11			5.86302	12
5.30263	16					3.32611	13					0.413894	10			1.72957	19	3.71417	11			6.096	12
5.70223	16					3.49482	13					1.08781	10			1.7988	19	3.76213	11			6.16756	12
6.12683	16					4.34057	13					1.46022	10			1.81039	19	3.78532	11			6.26287	12
6.13563	16					4.34376	13					1.64438	10			1.89972	19	3.87764	11			6.3538	12
7.81631	16					4.34716	13					2.04202	10			2.66891	19	3.88059	11			6.84291	12
7.84555	16					5.09264	13					2.13315	10			2.76062	19	4.08015	11			7.31604	12
7.84895	16					5.14117	13					3.21589	10			3.44511	19	4.32542	11			7.39214	12
9.33642	16					5.14396	13					3.21933	10			4.35557	19	4.40394	11			7.51043	12
9.34842	16					5.14691	13					3.22855	10			5.37728	19	4.51592	11			7.55532	12
0.516603	17					5.15051	13					3.23621	10			6.88518	19	4.65338	11			7.65822	12
0.521764	17					5.15699	13					4.01437	10			7.55299	19	5.40365	11			7.68509	12
0.526433	17					5.16624	13					4.35184	10			7.75964	19	5.9016	11			8.6705	12
1.63608	17					5.46271	13					5.10182	10			7.98373	19	5.92417	11			9.22547	12
1.64071	17					5.46668	13					5.18562	10			0.151831	20	5.95399	11			9.5876	12
1.64497	17					5.47213	13					5.4866	10			0.258696	20	6.05659	11			9.89923	12
3.08128	17					5.47713	13					5.79822	10			0.328328	20	6.0706	11			0.149533	13
3.08427	17					5.58051	13					6.01507	10			0.910535	20	6.15985	11			0.230757	13
3.08742	17					6.1413	13					6.03735	10			1.23887	20	6.85409	11			0.240997	13
3.09107	17					6.27843	13					6.50143	10			1.54558	20	6.93441	11			0.30768	13
3.09918	17					7.25906	13					6.52571	10			3.31231	20	6.94907	11			0.383456	13
3.59807	17					8.2138	13					6.70709	10			4.32788	20	7.17595	11			0.555488	13
3.60323	17					8.33094	13					6.98115	10			4.51879	20	7.65936	11			0.633354	13
3.68315	17					8.79293	13					8.11001	10			5.08761	20	7.71949	11			0.644331	13
4.45828	17					8.81403	13					8.12541	10			5.87785	20	7.73928	11			0.653957	13
4.46188	17					8.85298	13					8.15752	10			6.89026	20	7.76217	11			0.933837	13
4.47839	17					8.96279	13					8.18329	10			7.27426	20	7.77012	11			1.05516	13
6.80218	17					9.35429	13					8.21315	10			8.30551	20	8.08617	11			2.07753	13
6.80902	17					0.303295	14					8.86167	10			8.40243	20	8.33414	11			2.31989	13
6.81352	17					0.325536	14					8.86867	10			9.44003	20	9.1182	11			2.37309	13
7.27457	17					0.368257	14					8.89046	10			0.0825905	21	0.0408657	12			2.58314	13
7.2885	17					0.583871	14					8.92962	10			0.331177	21	0.194835	12			2.93441	13
8.08128	17					0.766431	14					9.26492	10			0.419487	21	0.289207	12			7.50167	13
8.61003	17					0.882143	14					9.53333	10			0.613843	21	0.806615	12			7.74178	13
8.61593	17					1.36244	14					9.63151	10			1.21547	21	0.895048	12			7.88583	13
8.62076	17					1.7181	14					0.0333335	11			1.40409	21	0.906558	12			7.96726	13
8.62621	17					2.10923	14					0.0682315	11			1.61237	21	1.25103	12			8.18804	13
9.13064	17					2.59157	14					0.0778162	11			1.62904	21	1.46931	12			8.27909	13
9.64141	17					2.83946	14					0.0843289	11			1.82671	21	1.82779	12			8.67182	13
9.64698	17					2.84544	14					0.182387	11			1.94046	21	1.87137	12			8.76139	13
0.53569	18					2.84929	14					0.273237	11			2.51185	21	1.90578	12			9.08588	13
0.538803	18					2.85437	14					0.379283	11			3.33069	21	2.49434	12			9.85675	13
0.542899	18					2.85933	14					0.384075	11			3.39991	21	2.71486	12			0.13577	14
3.06002	18					2.87227	14					0.637085	11			3.4779	21	3.0894	12			0.178	14
3.07063	18					3.0303	14					0.813501	11			3.5558	21	3.24321	12			0.189182	14
3.07575	18					3.43543	14					1.00716	11			3.77502	21	3.5704	12			0.204215	14
3.75937	18					3.78601	14					1.09559	11			4.68343	21	3.7564	12			0.22195	14
3.7674	18					3.79367	14					1.31878	11			4.82102	21	5.10112	12			0.244233	14
3.81115	18					3.79891	14					1.34541	11			4.85743	21	5.17411	12			0.250541	14
4.26507	18					3.80923	14					1.64012	11			4.89487	21	5.29388	12			0.269054	14
4.2697	18					3.83819	14					1.99233	11			4.93952	21	5.49929	12			0.297481	14
4.27359	18					4.64818	14					2.02989	11			4.96028	21	5.57191	12			0.684677	14
5.91195	18					4.65174	14					2.87498	11			4.96934	21	5.77045	12			0.735959	14
5.9158	18					4.66194	14					4.50937	11			5.392	21	5.79572	12			0.821074	14
5.92072	18					4.66862	14					4.74534	11			5.57182	21	5.86302	12			0.84266	14
6.05031	18					4.67644	14					4.75837	11			6.87709	21	6.096	12			0.856218	14
6.39524	18					5.30411	14					4.76521	11			6.94017	21	6.16756	12			0.923064	14
6.40015	18					5.78982	14					4.77201	11			7.02643	21	6.26287	12			0.929905	14
7.01234	18					5.88415	14					4.78745	11			7.08333	21	6.3538	12			0.938465	14
7.05117	18					7.59911	14					5.9515	11			7.22714	21	6.84291	12			0.966564	14
7.05797	18					7.60521	14					6.18521	11			7.42014	21	7.31604	12			1.44236	14
7.06203	18					7.61361	14					7.87375	11			7.47355	21	7.39214	12			1.49671	14
7.06813	18					7.63048	14					8.79613	11			7.56911	21	7.51043	12			1.60984	14
7.07309	18					8.27675	14					8.80691	11			7.64153	21	7.55532	12			1.77848	14
7.48031	18					8.28056	14					8.81399	11			7.7402	21	7.65822	12			2.06892	14
7.54384	18					8.28445	14					9.7655	11			7.83736	21	7.68509	12			2.18156	14
7.54851	18					8.29027	14					9.96387	11			8.85461	21	8.6705	12			2.19987	14
7.55375	18					8.29723	14					9.96813	11			9.67393	21	9.22547	12			2.23321	14
7.75733	18					8.30575	14					9.97255	11			9.83269	21	9.5876	12			2.28929	14
8.62445	18					9.31689	14					9.97951	11			9.83945	21	9.89923	12			2.39251	14
8.63703	18					9.91323	14					9.99074	11			9.85567	21	0.149533	13			2.52587	14
8.99539	18					0.0416006	15					0.120824	12			0.145751	22	0.230757	13			2.58777	14
9.59148	18					0.0474169	15					0.12578	12			0.184868	22	0.240997	13			2.61242	14
0.328637	19					0.0542982	15					0.16928	12			0.206781	22	0.30768	13			2.748	14
0.332897	19					0.0901383	15					0.332015	12			0.358948	22	0.383456	13			3.26111	14
0.668196	19					0.161655	15					0.530753	12			0.457457	22	0.555488	13			4.05455	14
0.672702	19					0.177711	15					1.31428	12			0.579928	22	0.633354	13			4.08052	14
0.682245	19					0.239807	15					1.44601	12			1.01087	22	0.644331	13			5.26983	14
2.08259	19					0.266512	15					1.61464	12			1.05162	22	0.653957	13			6.6411	14
2.29996	19					0.302803	15					1.64458	12			1.1478	22	0.933837	13			7.1744	14
2.9618	19					0.323734	15					1.65822	12			1.32204	22	1.05516	13			7.57638	14
2.96524	19					0.515345	15					1.71528	12			2.75995	22	2.07753	13			7.65379	14
3.84785	19					0.793218	15					1.94117	12			2.87083	22	2.31989	13			7.94326	14
3.85542	19					1.20884	15					2.00011	12			4.8784	22	2.37309	13			9.12528	14
4.33683	19					1.40533	15					2.05664	12			4.89794	22	2.58314	13			9.33508	14
4.37005	19					2.0849	15					3.09453	12			6.57325	22	2.93441	13			0.122335	15
5.77633	19					2.15211	15					3.10063	12			6.58325	22	7.50167	13			0.140112	15
5.77989	19					2.1583	15					3.10792	12			7.1111	22	7.74178	13			0.23346	15
5.78354	19					2.17366	15					4.5063	12			7.6324	22	7.88583	13			0.293057	15
5.78907	19					2.19811	15					4.52252	12			7.6727	22	7.96726	13			0.492942	15
6.94668	19					2.40287	15					5.79224	12			8.75036	22	8.18804	13			0.545945	15
6.95	19					3.62209	15					5.7949	12			8.93579	22	8.27909	13			0.586618	15
6.95344	19					3.63941	15					5.79773	12			0.0848433	23	8.67182	13			0.610744	15
6.95754	19					3.7027	15					6.65417	12			0.378568	23	8.76139	13			0.635606	15
6.96532	19					3.73223	15					6.65716	12			0.511115	23	9.08588	13			0.65367	15
7.86788	19					5.16682	15					6.66408	12			0.538804	23	9.85675	13			0.674232	15
8.86456	19					5.19725	15					6.75124	12			0.546013	23	0.13577	14			0.68054	15
9.41457	19					5.3368	15					7.61824	12			0.554574	23	0.178	14			0.858388	15
0.501161	20					6.56061	15					7.62218	12			0.565428	23	0.189182	14			1.05328	15
0.794189	20					6.63941	15					7.62619	12			0.578085	23	0.204215	14			1.14069	15
0.800743	20					6.96365	15					7.63643	12			0.599507	23	0.22195	14			1.1898	15
0.807542	20					7.06761	15					8.54824	12			0.610525	23	0.244233	14			1.21904	15
3.19158	20					7.1225	15					8.55639	12			0.672375	23	0.250541	14			1.35118	15
3.41392	20					7.859	15					8.56405	12			0.954058	23	0.269054	14			1.38403	15
3.4208	20					7.89738	15					9.97697	12			1.13162	23	0.297481	14			1.39746	15
3.42989	20					7.96636	15					9.98103	12			1.27277	23	0.684677	14			1.70671	15
5.10069	20					8.08678	15					9.98504	12			1.28436	23	0.735959	14			1.74673	15
5.33245	20					8.27352	15					9.99409	12			1.34093	23	0.821074	14			1.81653	15
6.24647	20					8.35716	15					0.154207	13			1.37947	23	0.84266	14			1.82447	15
6.25307	20					8.39115	15					0.190702	13			1.39073	23	0.856218	14			1.83226	15
6.26208	20					8.60419	15					0.226215	13			1.42027	23	0.923064	14			1.84041	15
8.6156	20					9.60787	15					0.283231	13			1.53176	23	0.929905	14			1.86244	15
9.00276	20					9.6141	15					0.53448	13			1.55384	23	0.938465	14			1.90168	15
9.18978	20					9.61811	15					0.642861	13			1.69498	23	0.966564	14			2.21753	15
0.0104178	21					9.62602	15					1.13991	13			3.14231	23	1.44236	14			2.26574	15
0.36931	21					0.309398	16					1.23531	13			3.7792	23	1.49671	14			2.28028	15
0.906174	21					0.314231	16					1.33611	13			3.80287	23	1.60984	14			2.33312	15
0.930627	21					0.322874	16					1.64126	13			3.95045	23	1.77848	14			2.42474	15
0.935788	21					0.330615	16					3.24321	13			5.40503	23	2.06892	14			2.51633	15
0.942342	21					0.484297	16					4.0022	13			6.68069	23	2.18156	14			2.58006	15
0.981991	21					0.563227	16					4.01289	13			7.04663	23	2.19987	14			2.86261	15
2.02963	21					0.726494	16					4.02539	13			7.10975	23	2.23321	14			2.94637	15
2.06285	21					0.970248	16					4.11243	13			7.56481	23	2.28929	14			2.97046	15
2.36767	21					1.24779	16					4.23469	13			7.67659	23	2.39251	14			3.02506	15
3.42022	21					2.0534	16					4.28626	13			7.71329	23	2.52587	14			3.10452	15
3.55125	21					2.20409	16					5.46124	13			7.72886	23	2.58777	14			3.16743	15
3.55486	21					2.22973	16					5.57384	13			7.73873	23	2.61242	14			3.20634	15
3.55969	21					2.23288	16					5.57786	13			7.7808	23	2.748	14			3.24612	15
4.82516	21					2.45288	16					5.58199	13			8.11978	23	3.26111	14			3.39275	15
4.83367	21					3.01539	16					5.5881	13			8.47388	23	4.05455	14			3.44277	15
5.45512	21					3.01686	16					5.59641	13			0.17471	24	4.08052	14			3.45473	15
5.46176	21					3.492	16					5.8273	13			0.232955	24	5.26983	14			3.48033	15
5.46589	21					4.03685	16					6.11579	13			0.25278	24	6.52452	14			3.59227	15
5.69892	21					4.52833	16					6.46829	13			0.369024	24	6.52882	14			3.60009	15
6.43399	21					4.53165	16					7.27447	13			0.39954	24	6.53456	14			3.63737	15
6.4412	21					4.54484	16					7.579	13			0.431652	24	6.545	14			3.65285	15
6.44599	21					4.87567	16					7.7272	13			0.499032	24	6.6411	14			3.66653	15
8.24319	21					5.32701	16					7.75866	13			0.54675	24	7.1744	14			3.69778	15
8.24655	21					6.05909	16					9.11116	13			0.580174	24	7.57638	14			3.81264	15
8.25016	21					6.06384	16					9.29724	13			0.672375	24	7.65379	14			3.82644	15
8.25966	21					6.0688	16					0.138765	14			0.680198	24	7.94326	14			3.83611	15
8.51218	21					6.12921	16					0.548284	14			0.708666	24	9.12528	14			3.84381	15
8.8793	21					7.99683	16					0.620538	14			0.812172	24	9.33508	14			3.86191	15
8.88315	21					8.15809	16					0.709585	14			0.871277	24	0.122335	15			4.18066	15
8.89368	21					8.67902	16					0.821447	14			0.893396	24	0.140112	15			4.36765	15
9.46036	21					8.70544	16					1.08945	14			0.933619	24	0.23346	15			4.42249	15
9.46553	21					8.96582	16					1.22679	14			0.944514	24	0.293057	15			4.45264	15
9.82982	21					9.08047	16					1.26861	14			1.0848	24	0.492942	15			4.83009	15
9.86132	21					9.15739	16					1.42733	14			1.29353	24	0.545945	15			4.89279	15
0.621993	22					9.7883	16					1.51703	14			1.32983	24	0.586618	15			4.94866	15
1.04749	22					0.139249	17					2.12984	14			1.42567	24	0.610744	15			5.05721	15
1.05105	22					0.156698	17					2.15048	14			1.53336	24	0.635606	15			5.10882	15
1.06625	22					0.377351	17					2.49209	14			1.63318	24	0.65367	15			5.32152	15
1.07546	22					0.39611	17					3.4107	14			1.6673	24	0.674232	15			5.40123	15
1.70895	22					0.615861	17					3.41979	14			1.79874	24	0.68054	15			5.52297	15
1.71186	22					0.706997	17					3.72343	14			1.88492	24	0.858388	15			5.58637	15
1.71489	22					0.960049	17					4.0208	14			2.92432	24	1.05328	15			5.72936	15
1.71915	22					0.981758	17					4.85675	14			2.97953	24	1.14069	15			5.79199	15
3.07812	22					2.0586	17					5.41578	14			3.72439	24	1.1898	15			5.86543	15
3.10614	22					2.29363	17					5.87682	14			4.33138	24	1.21904	15			5.89107	15
3.11593	22					2.83209	17					6.3065	14			4.35506	24	1.35118	15			5.94117	15
3.12044	22					2.835	17					7.07134	14			4.77437	24	1.38403	15			5.97603	15
3.64026	22					2.85843	17					7.07646	14			5.78485	24	1.39746	15			6.0013	15
3.64661	22					3.83799	17					7.52096	14			6.68843	24	1.70671	15			6.07404	15
3.87005	22					3.8409	17					7.60194	14			7.43108	24	1.74673	15			6.10894	15
4.03635	22					3.85171	17					7.94875	14			7.87488	24	1.81653	15			6.2183	15
5.66758	22					3.85679	17					9.9365	14			7.88791	24	1.82447	15			6.3905	15
5.67328	22					3.8658	17					9.9433	14			8.25536	24	1.83226	15			6.72064	15
5.67717	22					4.10841	17					9.95051	14			8.49637	24	1.84041	15			6.76787	15
5.68282	22					4.81206	17					9.96178	14			8.5114	24	1.86244	15			6.86412	15
5.68982	22					4.81665	17					0.183698	15			8.53274	24	1.90168	15			6.90443	15
6.20744	22					4.8216	17					0.203031	15			8.63592	24	2.21753	15			6.92511	15
6.21735	22					4.87461	17					0.862448	15			8.73652	24	2.26574	15			7.05872	15
6.23246	22					5.78154	17					1.21126	15			8.7697	24	2.28028	15			8.4118	15
6.24201	22					5.78753	17					1.43974	15			9.7862	24	2.33312	15			9.04902	15
7.13166	22					5.79564	17					1.60698	15			9.88148	24	2.42474	15			9.05741	15
7.27895	22					5.80141	17					1.66584	15			9.98064	24	2.51633	15			9.08191	15
7.28231	22					5.82218	17					1.78798	15			0.256425	25	2.58006	15			9.11398	15
7.28616	22					6.08207	17					3.55504	15			0.289562	25	2.86261	15			9.54644	15
7.65415	22					7.47107	17					3.56901	15			0.417726	25	2.94637	15			9.96804	15
7.65755	22					7.47471	17					3.94957	15			0.470892	25	2.97046	15			0.00150306	16
7.66209	22					7.47893	17					3.95993	15			0.649478	25	3.02506	15			0.176116	16
8.40916	22					7.48663	17					4.5797	15			0.727057	25	3.10452	15			0.245461	16
8.41314	22					7.63294	17					4.70832	15			0.819176	25	3.16743	15			0.364737	16
8.41707	22					7.73178	17					4.71348	15			0.865297	25	3.20634	15			0.566425	16
0.0680077	23					8.01997	17					4.71913	15			0.91449	25	3.24612	15			0.601691	16
1.89028	23					8.75607	17					6.06061	15			1.17246	25	3.39275	15			0.618895	16
1.89372	23					8.75943	17					6.07229	15			1.26863	25	3.44277	15			0.698931	16
1.89737	23					8.76737	17					6.07532	15			1.334	25	3.45473	15			0.784005	16
1.90171	23					8.77495	17					6.07847	15			1.47163	25	3.48033	15			0.839588	16
3.32864	23					9.56974	17					6.08249	15			1.70359	25	3.59227	15			0.883825	16
3.34375	23					9.57261	17					6.08765	15			2.20334	25	3.60009	15			0.976108	16
3.87038	23					9.57978	17					6.35245	15			2.33183	25	3.63737	15			1.00371	16
3.87443	23					9.58727	17					7.65122	15			2.48777	25	3.65285	15			1.14224	16
3.88	23					9.8189	17					8.39784	15			2.62695	25	3.66653	15			1.19877	16
5.35706	23					0.187992	18					8.40279	15			2.80795	25	3.69778	15			1.22273	16
5.65144	23					0.611642	18					8.41082	15			4.00088	25	3.81264	15			1.27966	16
5.65443	23					0.624299	18					8.43093	15			4.16701	25	3.82644	15			1.35089	16
5.66095	23					1.36994	18					8.62406	15			4.19421	25	3.83611	15			1.43519	16
6.45201	23					3.11541	18					9.3681	15			5.65173	25	3.84381	15			1.48803	16
6.45524	23					3.149	18					9.37224	15			5.66103	25	3.86191	15			1.63114	16
6.46254	23					3.15539	18					9.38301	15			5.73713	25	4.18066	15			1.88178	16
7.96798	23					4.02026	18					9.84733	15			6.34187	25	4.36765	15			1.92872	16
7.97097	23					4.19897	18					0.233301	16			6.49522	25	4.42249	15			2.10423	16
7.97814	23					4.44952	18					0.249521	16			7.0558	25	4.45264	15			2.35503	16
8.08038	23					5.08858	18					0.467142	16			7.07665	25	4.83009	15			2.43163	16
8.22456	23					5.09223	18					0.699918	16			7.40994	25	4.89279	15			2.58289	16
8.87472	23					5.09587	18					0.79257	16			7.55584	25	4.94866	15			2.81546	16
8.87783	23					5.10112	18					0.93122	16			7.8243	25	5.05721	15			2.94031	16
8.88102	23					5.13872	18					1.16379	16			8.08488	25	5.10882	15			3.36908	16
8.88512	23					5.59333	18					1.20504	16			8.12228	25	5.32152	15			3.41901	16
9.08689	23					6.63327	18					1.25497	16			8.32163	25	5.40123	15			3.81653	16
9.55977	23					8.62217	18					1.3878	16			9.19425	25	5.52297	15			3.92749	16
9.56514	23					8.62856	18					1.39509	16			9.72484	25	5.58637	15			4.16747	16
9.57014	23					8.63249	18					1.55578	16			0.136658	26	5.72936	15			4.23899	16
0.28911	24					8.63741	18					2.24874	16			0.180198	26	5.79199	15			4.98541	16
0.29251	24					8.64298	18					2.69033	16			0.225009	26	5.86543	15			5.2942	16
0.29591	24					9.21072	18					2.70774	16			0.273669	26	5.89107	15			5.66731	16
0.300047	24					9.21548	18					2.70918	16			0.343383	26	5.94117	15			6.00519	16
2.1129	24					9.22465	18					2.87531	16			0.425959	26	5.97603	15			6.09289	16
2.64235	24					0.01342	19					3.5616	16			0.538845	26	6.0013	15			7.31178	16
2.64649	24					0.257829	19					3.56643	16			0.662831	26	6.07404	15			7.31886	16
2.65021	24					0.360639	19					3.5722	16			0.718578	26	6.10894	15			7.32509	16
2.65677	24					0.913846	19					4.00532	16			0.814507	26	6.2183	15			7.33586	16
2.71731	24					1.06663	19					4.17989	16			0.837977	26	6.3905	15			7.62614	16
3.43456	24					1.1628	19					4.78208	16			0.854443	26	6.72064	15			7.80862	16
3.43976	24					1.18095	19					5.845	16			0.861488	26	6.76787	15			9.14093	16
3.44529	24					1.2174	19					5.87252	16			0.877872	26	6.86412	15			9.23739	16
3.45287	24					1.74517	19					5.98344	16			1.18175	26	6.90443	15			9.37969	16
3.46024	24					1.8728	19					7.41893	16			1.46172	26	6.92511	15			9.53849	16
3.78854	24					2.06585	19					7.42188	16			1.6181	26	7.05872	15			0.204747	17
3.80332	24					4.05561	19					7.42839	16			4.69589	26	8.4118	15			0.238908	17
4.43177	24					4.05889	19					7.44113	16			4.7212	26	9.04902	15			0.276018	17
6.75135	24					4.07175	19					7.66113	16			5.59553	26	9.05741	15			0.310547	17
6.75454	24					4.07744	19					8.25116	16			5.71538	26	9.08191	15			0.571545	17
6.76154	24					4.29523	19					8.25472	16			6.80296	26	9.11398	15			0.585922	17
7.15316	24					4.6653	19					8.25861	16			7.45189	26	9.54644	15			0.747264	17
7.24631	24					4.73604	19					8.26402	16			7.52492	26	9.96804	15			0.908073	17
7.2504	24					4.83254	19					8.79151	16			7.84813	26	0.00150306	16			1.00392	17
7.25458	24					5.35216	19					9.60632	16			8.5139	26	0.176116	16			1.04836	17
7.70993	24					5.3574	19					9.61017	16			8.73021	26	0.245461	16			1.06995	17
8.28477	24					6.33819	19					9.61472	16			8.93255	26	0.364737	16			1.35523	17
9.05998	24					6.35167	19					9.62013	16			9.06211	26	0.566425	16			1.4227	17
9.57538	24					6.36826	19					0.199713	17			9.79882	26	0.601691	16			1.44694	17
9.5798	24					6.63331	19					0.226993	17			9.81307	26	0.618895	16			1.65981	17
9.59459	24					6.70536	19					0.242271	17			9.87255	26	0.698931	16			2.35155	17
0.426368	25					6.85974	19					0.270124	17			0.155458	27	0.784005	16			3.17931	17
0.430546	25					7.35339	19					0.282043	17			0.16148	27	0.839588	16			3.33807	17
0.435215	25					7.35982	19					0.717818	17			0.169631	27	0.883825	16			3.9168	17
1.22579	25					7.79318	19					0.826034	17			0.177823	27	0.976108	16			4.01891	17
1.34953	25					7.82844	19					0.937282	17			0.269532	27	1.00371	16			4.29363	17
1.35051	25					8.59079	19					1.4331	17			0.548061	27	1.14224	16			4.9512	17
1.35375	25					9.16063	19					1.57233	17			0.656646	27	1.19877	16			5.15736	17
1.78739	25					9.24185	19					2.7503	17			0.792798	27	1.22273	16			5.23637	17
1.79382	25					0.178162	20					2.75538	17			0.936854	27	1.27966	16			5.48962	17
1.83044	25					0.333318	20					2.84516	17			1.0379	27	1.35089	16			5.63643	17
2.51222	25					1.80792	20					4.63029	17			1.29489	27	1.43519	16			6.09997	17
2.63895	25					1.81267	20					4.64122	17			1.40269	27	1.48803	16			7.29052	17
2.64817	25					1.81833	20					4.65585	17			1.53237	27	1.63114	16			7.35986	17
3.02123	25					2.63585	20					4.66645	17			1.55298	27	1.88178	16			7.84356	17
3.02832	25					2.64744	20					4.72486	17			2.40167	27	1.92872	16			8.61652	17
3.0488	25					2.65703	20					5.05836	17			4.99436	27	2.10423	16			8.73321	17
3.28002	25					4.21679	20					5.72667	17			5.35711	27	2.35503	16			8.81305	17
3.37279	25					4.22563	20					5.73486	17			5.71784	27	2.43163	16			8.8366	17
4.02226	25					4.24083	20					5.74039	17			5.79739	27	2.58289	16			8.96259	17
4.31188	25					5.18902	20					5.80007	17			7.00219	27	2.81546	16			9.28376	17
6.24422	25					5.71314	20					5.93179	17			7.48826	27	2.94031	16			9.70008	17
6.24741	25					5.82562	20					6.14638	17			7.73455	27	3.36908	16			0.145355	18
6.25065	25					6.65932	20					6.47329	17			8.2169	27	3.41901	16			0.173576	18
6.25528	25					6.66546	20					7.62275	17			9.02787	27	3.81653	16			0.184431	18
6.26163	25					6.76078	20					7.62611	17			0.125353	28	3.92749	16			0.219534	18
7.62896	25					7.59874	20					7.63397	17			0.148864	28	4.16747	16			0.227808	18
7.63264	25					7.6055	20					7.71634	17			0.161848	28	4.23899	16			0.248124	18
7.63637	25					7.61492	20					8.22994	17			0.178601	28	4.98541	16			0.28122	18
7.64313	25					7.66759	20					0.127419	18			0.204693	28	5.2942	16			0.291992	18
7.97208	25					7.71531	20					0.156378	18			0.218332	28	5.66731	16			0.317592	18
7.98043	25					9.07478	20					0.460875	18			0.299065	28	6.00519	16			0.358061	18
8.7384	25					9.07826	20					0.553732	18			0.328638	28	6.09289	16			0.413111	18
8.74188	25					9.08195	20					0.911723	18			0.625926	28	7.31178	16			0.434574	18
8.75012	25					9.08694	20					1.09051	18			0.698139	28	7.31886	16			0.62807	18
8.75647	25					9.09473	20					1.15052	18			0.717718	28	7.32509	16			0.728668	18
0.391224	26					9.25328	20					1.19009	18			0.896877	28	7.33586	16			0.758282	18
0.479493	26					9.78003	20					1.26279	18			0.92428	28	7.62614	16			0.816241	18
0.512752	26					9.82091	20					1.29593	18			0.966796	28	7.80862	16			0.894065	18
0.521436	26					0.0468844	21					1.5423	18			1.07567	28	9.14093	16			0.924539	18
0.5293	26					0.24677	21					1.67444	18			1.10561	28	9.23739	16			0.935475	18
0.931979	26					0.30608	21					1.70758	18			1.32151	28	9.28618	16			0.951941	18
1.21989	26					0.329427	21					2.10116	18			1.59111	28	9.28859	16			1.185	18
1.35809	26					0.569904	21					2.96743	18			2.27596	28	9.37969	16			1.27311	18
1.65894	26					0.621227	21					2.97071	18			2.41809	28	9.53849	16			1.33762	18
1.69273	26					0.73399	21					2.97447	18			2.51173	28	0.204747	17			1.50167	18
2.11904	26					0.926011	21					2.97886	18			2.66324	28	0.238908	17			1.52014	18
2.29439	26					1.05684	21					3.08548	18			3.19851	28	0.276018	17			1.55299	18
2.80099	26					1.12106	21					3.32358	18			4.11241	28	0.310547	17			1.59772	18
2.80537	26					1.25017	21					4.2127	18			5.89913	28	0.571545	17			1.73788	18
2.81348	26					1.75046	21					4.21626	18			6.0438	28	0.585922	17			1.79658	18
3.58214	26					1.8529	21					4.21982	18			6.34822	28	0.747264	17			1.84729	18
3.59783	26					2.67435	21					4.22433	18			6.38631	28	0.908073	17			1.87662	18
4.15271	26					2.67755	21					4.23101	18			0.153902	29	1.00392	17			1.88899	18
4.16377	26					2.68099	21					5.16817	18			0.161848	29	1.04836	17			1.89791	18
4.42375	26					3.31956	21					5.17272	18			0.190561	29	1.06995	17			1.90598	18
4.43358	26					4.7301	21					5.17858	18			0.248684	29	1.35523	17			2.13016	18
6.80205	26					4.84593	21					5.20344	18			0.267935	29	1.4227	17			2.1454	18
6.81418	26					4.84925	21					6.137	18			0.301768	29	1.44694	17			2.22879	18
7.30017	26					4.85765	21					6.14728	18			0.364765	29	1.65981	17			2.26447	18
7.30418	26					5.54975	21					7.35364	18			0.519102	29	2.35155	17			2.42298	18
7.31721	26					6.43474	21					7.35643	18			0.662667	29	3.17931	17			2.54726	18
7.88234	26					6.44063	21					7.35946	18			0.799761	29	3.33807	17			2.61361	18
7.88561	26					6.45517	21					7.36331	18			0.944596	29	3.9168	17			2.69742	18
7.88913	26					6.86748	21					7.4732	18			0.97081	29	4.01891	17			3.15572	18
7.90224	26					7.57158	21					7.63213	18			1.04925	29	4.29363	17			3.83807	18
8.0234	26					7.58272	21					7.86101	18			1.11683	29	4.9512	17			3.90439	18
8.22501	26					7.59075	21					8.09436	18			1.4969	29	5.15736	17			4.05803	18
8.44865	26					7.95517	21					8.12705	18			1.57641	29	5.23637	17			4.23043	18
9.41621	26					7.9596	21					8.1959	18			2.41076	29	5.48962	17			4.24968	18
9.875	26					7.96566	21					8.78823	18			2.5447	29	5.63643	17			4.25963	18
9.87832	26					7.97676	21					8.79155	18			3.63744	29	6.09997	17			4.27278	18
9.88184	26					7.98987	21					8.79495	18			3.78706	29	7.29052	17			4.41692	18
9.88606	26					8.0076	21					8.79925	18			4.33007	29	7.35986	17			4.8214	18
9.89233	26					8.03636	21					8.80609	18			4.69949	29	7.84356	17			4.9696	18
0.52971	27					8.42376	21					9.53088	18			5.97274	29	8.58265	17			5.09387	18
0.532987	27					8.57302	21					9.55013	18			7.95508	29	8.58797	17			5.16997	18
0.536386	27					9.34139	21					0.139338	19			7.96438	29	8.59334	17			5.49216	18
0.54081	27					9.3463	21					0.145032	19			8.22288	29	8.61652	17			5.5355	18
0.638951	27					9.36105	21					0.154043	19			8.56907	29	8.73321	17			5.56208	18
1.38094	27					0.194095	22					0.201188	19			9.79833	29	8.81305	17			5.86355	18
1.39065	27					0.286952	22					0.619309	19			9.80656	29	8.8366	17			6.10812	18
1.39688	27					0.392547	22					0.632867	19			0.17983	30	8.96259	17			6.14634	18
2.86235	27					0.506252	22					1.09518	19			0.22079	30	9.28376	17			6.19668	18
3.49772	27					0.842493	22					1.24735	19			0.256917	30	9.70008	17			6.29494	18
3.54138	27					1.52563	22					1.26853	19			0.507265	30	0.145355	18			6.66182	18
4.28522	27					1.92224	22					1.54198	19			0.618431	30	0.173576	18			6.95227	18
4.37185	27					2.23661	22					1.72957	19			0.93923	30	0.184431	18			7.02784	18
4.7239	27					2.54963	22					1.7988	19			1.06469	30	0.219534	18			7.30756	18
5.06911	27					4.85617	22					1.81039	19			1.40507	30	0.227808	18			7.9852	18
5.65411	27					4.85945	22					1.89972	19			1.47355	30	0.248124	18			9.61255	18
6.28202	27					4.86285	22					2.64823	19			1.53135	30	0.28122	18			9.69971	18
6.29292	27					4.86715	22					2.65376	19			1.62359	30	0.291992	18			0.129299	19
6.30681	27					4.8742	22					2.66019	19			1.7665	30	0.317592	18			0.15326	19
6.37853	27					4.89255	22					2.66891	19			1.92874	30	0.358061	18			0.172143	19
7.50276	27					5.34835	22					2.76062	19			2.56129	30	0.413111	18			0.220885	19
7.54286	27					6.45976	22					3.44511	19			2.78821	30	0.434574	18			0.292566	19
7.92805	27					7.19487	22					4.35557	19			2.83277	30	0.62807	18			0.303092	19
8.59332	27					7.4485	22					4.36175	19			3.8997	30	0.728668	18			0.320459	19
8.59799	27					8.34786	22					4.36589	19			3.91465	30	0.758282	18			0.572118	19
9.62679	27					8.35597	22					4.37101	19			3.95557	30	0.816241	18			0.84352	19
9.63576	27					8.36187	22					5.37728	19			4.87734	30	0.894065	18			0.89771	19
0.654433	28					8.3921	22					6.88518	19			5.55547	30	0.924539	18			0.925727	19
1.04097	28					8.40471	22					6.89268	19			8.67496	30	0.935475	18			0.941456	19
1.04732	28					0.126552	23					6.89599	19			9.88606	30	0.951941	18			1.21089	19
1.60946	28					0.153995	23					6.90603	19					1.04037	18			1.2607	19
1.61831	28					0.162965	23					7.5258	19					1.04562	18			1.5849	19
1.6222	28					0.404138	23					7.53067	19					1.185	18			1.59162	19
1.62605	28					0.432811	23					7.53837	19					1.27311	18			1.6787	19
1.6315	28					0.483642	23					7.55299	19					1.33762	18			1.71146	19
1.63875	28					0.64441	23					7.75964	19					1.50167	18			1.86552	19
2.06154	28					0.685985	23					7.98373	19					1.52014	18			1.88227	19
2.54872	28					1.03259	23					9.75313	19					1.55299	18			1.89103	19
2.5558	28					1.11303	23					9.75628	19					1.59772	18			1.93642	19
2.68229	28					1.14662	23					9.75943	19					1.73788	18			1.94342	19
2.99371	28					1.26434	23					9.7632	19					1.79658	18			1.95669	19
3.66316	28					1.38722	23					9.77406	19					1.84729	18			2.12614	19
3.84465	28					1.44743	23					0.151831	20					1.87662	18			2.25963	19
3.85198	28					1.46767	23					0.258696	20					1.88899	18			2.34696	19
3.85776	28					1.56245	23					0.328328	20					1.89791	18			2.45125	19
3.8646	28					1.72248	23					0.910535	20					1.90598	18			2.61799	19
4.89376	28					1.78449	23					1.23887	20					2.13016	18			2.7464	19
4.89675	28					2.93953	23					1.54558	20					2.1454	18			2.87551	19
4.90064	28					3.05516	23					3.31231	20					2.22879	18			2.89837	19
4.91097	28					3.18078	23					4.22347	20					2.26447	18			3.11246	19
5.21591	28					3.43666	23					4.22671	20					2.42298	18			4.34606	19
5.21985	28					3.44178	23					4.22974	20					2.54726	18			4.8624	19
5.22435	28					3.46185	23					4.23342	20					2.56397	18			4.89898	19
5.81684	28					4.41147	23					4.32788	20					2.56921	18			4.94723	19
6.07272	28					5.854	23					4.51879	20					2.57691	18			5.06237	19
6.07964	28					5.85724	23					4.99766	20					2.61361	18			5.22433	19
6.09242	28					5.86457	23					5.00184	20					2.69742	18			5.69529	19
6.13121	28					5.88775	23					5.00691	20					3.15572	18			5.85278	19
6.75782	28					6.39722	23					5.01674	20					3.83807	18			5.89665	19
7.50812	28					6.4009	23					5.08761	20					3.90439	18			6.06884	19
8.2595	28					6.40459	23					5.87785	20					4.05803	18			6.12647	19
8.26331	28					6.41249	23					6.89026	20					4.23043	18			6.14679	19
8.26699	28					6.42962	23					7.24964	20					4.24968	18			6.17841	19
8.27252	28					7.3728	23					7.25292	20					4.25963	18			6.24984	19
8.72079	28					7.40152	23					7.26066	20					4.27278	18			6.3316	19
9.54859	28					7.40496	23					7.27426	20					4.29777	18			6.46411	19
9.59537	28					7.4129	23					8.30551	20					4.29965	18			6.52526	19
9.6002	28					7.42142	23					8.31186	20					4.31042	18			6.67919	19
9.60483	28					7.47172	23					8.31637	20					4.41692	18			6.81169	19
9.70187	28					7.84122	23					8.40243	20					4.8214	18			6.89095	19
0.138131	29					9.53877	23					9.40849	20					4.9696	18			6.93363	19
0.693919	29					9.54996	23					9.41307	20					5.09387	18			7.09202	19
0.871112	29					0.417287	24					9.42794	20					5.16997	18			7.18754	19
2.04118	29					0.421669	24					9.44003	20					5.49216	18			7.29461	19
2.16955	29					1.10345	24					0.0825905	21					5.5355	18			7.63532	19
2.17307	29					1.9195	24					0.331177	21					5.56208	18			8.43814	19
2.17655	29					1.92642	24					0.419487	21					5.86355	18			9.40963	19
2.18102	29					1.94141	24					0.613843	21					6.10812	18			9.91803	19
3.64071	29					2.03091	24					1.21547	21					6.14634	18			9.98672	19
3.91527	29					2.21052	24					1.40409	21					6.19668	18			0.175338	20
4.87496	29					2.39443	24					1.61237	21					6.29494	18			0.181932	20
5.02058	29					2.77151	24					1.62904	21					6.66182	18			0.242635	20
5.19056	29					2.8085	24					1.82671	21					6.95227	18			0.265778	20
5.43096	29					2.93883	24					1.94046	21					7.02784	18			0.274011	20
5.5753	29					3.62139	24					2.51185	21					7.30756	18			0.405124	20
5.5966	29					3.62688	24					3.33069	21					7.9852	18			0.614102	20
6.62658	29					3.85036	24					3.34867	21					9.61255	18			0.724654	20
6.63035	29					4.1748	24					3.35416	21					9.69971	18			0.74284	20
6.63428	29					4.17812	24					3.39991	21					0.129299	19			0.759634	20
6.64518	29					4.18181	24					3.4779	21					0.15326	19			0.81751	20
8.12314	29					4.19901	24					3.5558	21					0.172143	19			0.949115	20
8.13399	29					4.27642	24					3.77502	21					0.179516	19			1.02669	20
0.218372	30					4.99142	24					4.5866	21					0.181482	19			1.09624	20
1.09947	30					5.38939	24					4.59226	21					0.195162	19			1.15154	20
1.10315	30					5.393	24					4.68343	21					0.220885	19			1.1839	20
1.10696	30					5.39681	24					4.82102	21					0.292566	19			1.19709	20
1.54949	30					5.40086	24					4.85743	21					0.303092	19			1.47058	20
1.7255	30					5.40877	24					4.89487	21					0.320459	19			1.49016	20
1.94771	30					5.42441	24					4.93952	21					0.572118	19			1.61709	20
4.48347	30					5.92712	24					4.96028	21					0.84352	19			1.62844	20
4.99203	30					5.93125	24					4.96934	21					0.89771	19			1.642	20
4.99702	30					5.9367	24					5.392	21					0.925727	19			1.68939	20
5.0021	30					6.57199	24					5.57182	21					0.941456	19			1.70327	20
8.414	30					6.57547	24					6.83814	21					1.21089	19			1.71388	20
8.42121	30					6.59223	24					6.84097	21					1.2607	19			1.97132	20
8.42584	30					6.60148	24					6.84416	21					1.5849	19			2.04771	20
8.48338	30					8.02989	24					6.85465	21					1.59162	19			2.12553	20
8.99657	30					8.07011	24					6.87709	21					1.6787	19			2.21175	20
9.00104	30					8.18955	24					6.94017	21					1.71146	19			2.32648	20
9.00583	30					8.28904	24					7.02643	21					1.86552	19			2.36093	20
9.01505	30					9.60271	24					7.08333	21					1.88227	19			2.3715	20
9.93522	30					9.61099	24					7.22714	21					1.89103	19			2.70974	20
						0.124258	25					7.42014	21					1.93642	19			2.76123	20
						0.127412	25					7.47355	21					1.94342	19			2.77934	20
						0.130853	25					7.56911	21					1.95669	19			3.11181	20
						0.135031	25					7.64153	21					2.12614	19			3.40906	20
						0.141871	25					7.7402	21					2.25963	19			3.48893	20
						0.154036	25					7.83736	21					2.34696	19			3.51133	20
						0.324184	25					8.82335	21					2.45125	19			3.76856	20
						2.78085	25					8.82639	21					2.61799	19			4.39484	20
						2.78564	25					8.82962	21					2.7464	19			4.55078	20
						3.47738	25					8.83359	21					2.87551	19			4.57146	20
						3.48032	25					8.8442	21					2.89837	19			4.60247	20
						3.48733	25					8.85461	21					3.11246	19			4.68636	20
						4.10808	25					9.67393	21					4.34606	19			4.83074	20
						4.11447	25					9.83269	21					4.8624	19			4.91147	20
						4.11902	25					9.83945	21					4.89898	19			4.98696	20
						4.13405	25					9.85567	21					4.94723	19			5.21966	20
						5.08961	25					0.145751	22					5.06237	19			5.26987	20
						5.77077	25					0.154107	22					5.22433	19			5.39816	20
						5.77704	25					0.157179	22					5.69529	19			5.56004	20
						6.49888	25					0.160578	22					5.85278	19			5.81518	20
						6.50318	25					0.184868	22					5.89665	19			5.98508	20
						6.50789	25					0.206781	22					6.06884	19			6.56487	20
						7.09784	25					0.358948	22					6.12647	19			6.57732	20
						7.10402	25					0.457457	22					6.14679	19			6.60067	20
						7.11119	25					0.579928	22					6.17841	19			6.6107	20
						7.12975	25					1.01087	22					6.24984	19			6.88235	20
						8.28757	25					1.05162	22					6.3316	19			7.15203	20
						8.29056	25					1.1478	22					6.46411	19			7.17841	20
						8.29375	25					1.32204	22					6.52526	19			7.3681	20
						8.29793	25					2.3698	22					6.67919	19			7.48893	20
						8.30841	25					2.37312	22					6.81169	19			7.60669	20
						8.44448	25					2.37656	22					6.89095	19			8.44748	20
						9.08297	25					2.38152	22					6.93363	19			9.18464	20
						9.08637	25					2.75995	22					7.09202	19			9.44137	20
						9.09972	25					2.87083	22					7.18754	19			9.71388	20
						9.83557	25					3.7137	22					7.29461	19			9.85282	20
						9.85171	25					3.7169	22					7.63532	19			0.0324508	21
						9.88046	25					3.72755	22					8.43814	19			0.0560029	21
						0.0508575	26					4.83929	22					9.40963	19			0.0776708	21
						0.057534	26					4.84252	22					9.91803	19			0.0855351	21
						0.0623673	26					4.85772	22					9.98672	19			0.206859	21
						0.0703955	26					4.8784	22					0.117912	20			0.253144	21
						0.683282	26					4.89794	22					0.123523	20			0.26535	21
						1.82103	26					5.43411	22					0.175338	20			0.277024	21
						1.82504	26					5.43903	22					0.181932	20			0.296562	21
						1.8291	26					5.44779	22					0.242635	20			0.322981	21
						1.83574	26					6.53893	22					0.265778	20			0.504311	21
						1.8477	26					6.54323	22					0.274011	20			0.819131	21
						2.37858	26					6.547	22					0.405124	20			0.843543	21
						2.3853	26					6.55277	22					0.614102	20			1.09008	21
						3.28105	26					6.57325	22					0.724654	20			1.1394	21
						4.20409	26					6.58325	22					0.74284	20			1.28325	21
						4.20814	26					7.1111	22					0.759634	20			1.3168	21
						4.21249	26					7.6324	22					0.81751	20			1.35526	21
						4.21982	26					7.6727	22					0.949115	20			1.52729	21
						4.24341	26					8.75036	22					1.02669	20			1.55723	21
						5.02198	26					8.93579	22					1.09624	20			1.58758	21
						6.54901	26					0.0848433	23					1.15154	20			1.59745	21
						6.55254	26					0.378568	23					1.1839	20			1.6906	21
						6.5611	26					0.511115	23					1.19709	20			1.742	21
						7.00539	26					0.538804	23					1.47058	20			1.75048	21
						8.44809	26					0.546013	23					1.49016	20			1.76912	21
						8.45255	26					0.554574	23					1.61709	20			1.78026	21
						8.45681	26					0.565428	23					1.62844	20			1.80066	21
						8.85302	26					0.578085	23					1.642	20			1.82187	21
						0.0751059	27					0.599507	23					1.68939	20			1.95721	21
						0.0795706	27					0.610525	23					1.70327	20			1.98121	21
						1.04226	27					0.672375	23					1.71388	20			2.02119	21
						1.05332	27					0.954058	23					1.97132	20			2.09917	21
						1.10886	27					1.13162	23					2.04771	20			2.32192	21
						1.17304	27					1.27277	23					2.12553	20			2.43325	21
						1.36453	27					1.28436	23					2.21175	20			2.48408	21
						2.51526	27					1.34093	23					2.32648	20			2.60884	21
						2.51924	27					1.37947	23					2.36093	20			2.64161	21
						2.52878	27					1.39073	23					2.3715	20			2.6781	21
						2.5765	27					1.42027	23					2.70974	20			2.82347	21
						3.02161	27					1.53176	23					2.76123	20			2.84162	21
						3.56409	27					1.55384	23					2.77934	20			2.89515	21
						3.73809	27					1.69498	23					3.11181	20			2.90404	21
						4.67448	27					2.70887	23					3.40906	20			2.92018	21
						4.68574	27					2.71276	23					3.48893	20			3.23934	21
						5.36105	27					2.71788	23					3.51133	20			3.34268	21
						5.3651	27					2.72431	23					3.76856	20			3.39601	21
						5.36953	27					3.14231	23					4.39484	20			3.41842	21
						5.86674	27					3.7792	23					4.55078	20			3.46589	21
						6.84081	27					3.80287	23					4.57146	20			3.51766	21
						7.30338	27					3.95045	23					4.60247	20			3.55019	21
						8.11127	27					5.24029	23					4.68636	20			3.57063	21
						8.11639	27					5.24348	23					4.83074	20			3.58791	21
						8.15203	27					5.24696	23					4.91147	20			3.61343	21
						8.55245	27					5.25139	23					4.98696	20			3.6992	21
						0.371166	28					5.25696	23					5.21966	20			3.7071	21
						0.388328	28					5.40503	23					5.26987	20			3.71837	21
						0.737062	28					6.6213	23					5.39816	20			3.75527	21
						1.52747	28					6.62699	23					5.56004	20			3.79165	21
						2.39824	28					6.63277	23					5.81518	20			3.84338	21
						2.78302	28					6.68069	23					5.98508	20			3.92538	21
						2.94784	28					7.04663	23					6.56487	20			3.97539	21
						2.95485	28					7.10975	23					6.57732	20			4.02577	21
						2.96943	28					7.56481	23					6.60067	20			4.03339	21
						3.13098	28					7.67659	23					6.6107	20			4.04044	21
						3.87899	28					7.71329	23					6.88235	20			4.17086	21
						3.88485	28					7.72886	23					7.15203	20			4.17823	21
						3.89525	28					7.73873	23					7.17841	20			4.38233	21
						4.47688	28					7.7808	23					7.3681	20			4.404	21
						4.75865	28					8.11978	23					7.48893	20			4.42727	21
						5.11549	28					8.47388	23					7.60669	20			4.46212	21
						5.44297	28					9.36382	23					8.44748	20			4.47982	21
						5.91925	28					9.36677	23					9.18464	20			4.52057	21
						6.57367	28					9.99178	23					9.44137	20			4.60315	21
						6.57719	28					9.99535	23					9.71388	20			4.62682	21
						6.58518	28					9.99928	23					9.85282	20			4.70211	21
						6.9569	28					0.17471	24					0.0324508	21			4.74548	21
						8.29932	28					0.232955	24					0.0560029	21			4.82577	21
						8.30272	28					0.25278	24					0.0776708	21			4.86501	21
						8.30633	28					0.369024	24					0.0855351	21			5.49215	21
						8.31108	28					0.39954	24					0.206859	21			5.57505	21
						8.96759	28					0.431652	24					0.253144	21			5.61933	21
						8.98139	28					0.499032	24					0.26535	21			5.64243	21
						9.88517	28					0.54675	24					0.277024	21			5.80377	21
						9.94465	28					0.580174	24					0.296562	21			5.83154	21
						9.94768	28					0.672375	24					0.322981	21			6.02786	21
						9.95153	28					0.680198	24					0.504311	21			6.13813	21
						9.95657	28					0.708666	24					0.819131	21			6.1591	21
						1.35345	29					0.812172	24					0.843543	21			6.49841	21
						1.3573	29					0.871277	24					1.09008	21			6.71173	21
						1.36128	29					0.893396	24					1.1394	21			6.73344	21
						2.21992	29					0.933619	24					1.28325	21			6.79611	21
						2.23496	29					0.944514	24					1.3168	21			6.80602	21
						2.4194	29					1.0848	24					1.35526	21			6.82671	21
						3.07472	29					1.29353	24					1.52729	21			6.92808	21
						3.07836	29					1.32983	24					1.55723	21			7.11195	21
						4.69825	29					1.42567	24					1.58758	21			7.13563	21
						5.46749	29					1.53336	24					1.59745	21			7.1985	21
						5.47084	29					1.63318	24					1.6906	21			7.20571	21
						5.4742	29					1.6673	24					1.742	21			7.32691	21
						5.47834	29					1.79874	24					1.75048	21			7.35636	21
						6.64013	29					1.88492	24					1.76912	21			7.36378	21
						6.65562	29					2.90372	24					1.78026	21			7.7178	21
						6.65967	29					2.90781	24					1.80066	21			7.75716	21
						6.76322	29					2.9167	24					1.82187	21			7.83203	21
						7.65226	29					2.92432	24					1.95721	21			7.83916	21
						7.65639	29					2.97953	24					1.98121	21			7.92878	21
						7.66082	29					3.6983	24					2.02119	21			7.98129	21
						7.67126	29					3.70322	24					2.09917	21			7.99014	21
						7.68404	29					3.72439	24					2.32192	21			7.99997	21
						8.10605	29					4.33138	24					2.43325	21			8.04417	21
						8.67863	29					4.35506	24					2.48408	21			8.10016	21
						8.68253	29					4.77437	24					2.60884	21			8.1267	21
						8.68638	29					5.73549	24					2.64161	21			8.14366	21
						8.69125	29					5.73943	24					2.6781	21			8.34924	21
						8.70006	29					5.74365	24					2.82347	21			8.36882	21
						9.27497	29					5.75114	24					2.84162	21			8.37934	21
						9.42771	29					5.78485	24					2.89515	21			8.3895	21
						9.8616	29					6.68843	24					2.90404	21			8.43476	21
						0.329532	30					7.43108	24					2.92018	21			8.50026	21
						0.332809	30					7.87488	24					3.23934	21			8.52172	21
						0.336168	30					7.88791	24					3.34268	21			8.74704	21
						0.340632	30					8.25536	24					3.39601	21			8.84334	21
						0.347595	30					8.49637	24					3.41842	21			8.87709	21
						0.977275	30					8.5114	24					3.46589	21			8.96863	21
						1.03515	30					8.53274	24					3.51766	21			9.05187	21
						1.55444	30					8.63592	24					3.55019	21			9.06903	21
						2.93492	30					8.73652	24					3.57063	21			9.08123	21
						3.09381	30					8.7697	24					3.58791	21			9.09315	21
						3.10269	30					9.7862	24					3.61343	21			9.1054	21
						3.11019	30					9.88148	24					3.6992	21			9.19568	21
						3.11543	30					9.98064	24					3.7071	21			9.20866	21
						3.33228	30					9.98764	24					3.71837	21			9.21661	21
						3.59123	30					9.9924	24					3.75527	21			9.23139	21
						3.59594	30					9.99915	24					3.79165	21			9.50386	21
						3.60151	30					0.177618	25					3.84338	21			9.67139	21
						3.62375	30					0.182861	25					3.92538	21			9.68077	21
						3.7506	30					0.256425	25					3.97539	21			9.68834	21
						3.90928	30					0.289562	25					4.02577	21			9.69818	21
						4.06411	30					0.417726	25					4.03339	21			9.70706	21
						6.09282	30					0.470892	25					4.04044	21			9.80365	21
						6.09651	30					0.649478	25					4.17086	21			0.173804	22
						6.10478	30					0.727057	25					4.17823	21			0.20137	22
						6.11842	30					0.819176	25					4.38233	21			0.238234	22
						6.61138	30					0.865297	25					4.404	21			0.254537	22
						6.94299	30					0.91449	25					4.42727	21			0.340102	22
						7.21931	30					1.17246	25					4.46212	21			0.563785	22
						8.02512	30					1.26863	25					4.47982	21			0.757199	22
						8.03073	30					1.334	25					4.52057	21			0.798855	22
						8.03753	30					1.47163	25					4.60315	21			0.827978	22
						8.0474	30					1.70359	25					4.62682	21			0.908874	22
						8.05276	30					2.20334	25					4.70211	21			1.0191	22
						8.48321	30					2.33183	25					4.74548	21			1.06833	22
						9.61425	30					2.48777	25					4.82577	21			1.07693	22
						9.99223	30					2.62695	25					4.86501	21			1.10647	22
												2.80795	25					5.49215	21			1.11814	22
												4.00088	25					5.57505	21			1.14399	22
												4.00755	25					5.61933	21			1.15066	22
												4.01222	25					5.64243	21			1.24819	22
												4.16701	25					5.80377	21			1.29955	22
												4.19421	25					5.83154	21			1.33941	22
												5.53987	25					6.02786	21			1.34793	22
												5.5431	25					6.13813	21			1.35399	22
												5.54646	25					6.1591	21			1.38704	22
												5.55396	25					6.49841	21			1.8358	22
												5.65173	25					6.71173	21			1.87234	22
												5.66103	25					6.73344	21			2.00833	22
												5.73713	25					6.79611	21			2.05252	22
												6.31832	25					6.80602	21			2.11482	22
												6.32303	25					6.82671	21			2.12457	22
												6.32925	25					6.92808	21			2.18511	22
												6.34187	25					7.11195	21			2.20436	22
												6.49522	25					7.13563	21			2.25683	22
												7.0558	25					7.1985	21			2.29746	22
												7.07665	25					7.20571	21			2.30803	22
												7.40994	25					7.32691	21			2.36496	22
												7.55584	25					7.35636	21			2.39765	22
												7.8243	25					7.36378	21			2.40617	22
												8.08488	25					7.7178	21			2.49645	22
												8.12228	25					7.75716	21			2.5637	22
												8.32163	25					7.83203	21			2.73496	22
												9.17422	25					7.83916	21			2.80176	22
												9.17799	25					7.92878	21			2.83277	22
												9.187	25					7.98129	21			2.98526	22
												9.19425	25					7.99014	21			3.02995	22
												9.68872	25					7.99997	21			3.24614	22
												9.6931	25					8.04417	21			3.26478	22
												9.69728	25					8.10016	21			3.3127	22
												9.72484	25					8.1267	21			3.33416	22
												0.136658	26					8.14366	21			3.36173	22
												0.144276	26					8.34924	21			3.41129	22
												0.1487	26					8.36882	21			3.52774	22
												0.180198	26					8.37934	21			3.69023	22
												0.225009	26					8.3895	21			3.80332	22
												0.273669	26					8.43476	21			4.13469	22
												0.343383	26					8.50026	21			4.18073	22
												0.425959	26					8.52172	21			4.40506	22
												0.538845	26					8.74704	21			4.43288	22
												0.563093	26					8.84334	21			4.5404	22
												0.564076	26					8.87709	21			4.56555	22
												0.662831	26					8.96863	21			4.573	22
												0.718578	26					9.05187	21			4.59729	22
												0.814507	26					9.06903	21			4.60712	22
												0.837977	26					9.08123	21			4.66168	22
												0.854443	26					9.09315	21			4.76265	22
												0.861488	26					9.1054	21			5.13407	22
												0.877872	26					9.19568	21			5.14325	22
												1.18175	26					9.20866	21			5.20158	22
												1.46172	26					9.21661	21			5.38606	22
												1.6181	26					9.23139	21			5.54003	22
												2.55621	26					9.50386	21			5.57423	22
												2.5599	26					9.67139	21			5.58328	22
												2.56387	26					9.68077	21			5.77047	22
												2.56907	26					9.68834	21			5.80611	22
												3.51468	26					9.69818	21			5.87463	22
												3.51853	26					9.70706	21			6.18454	22
												3.52234	26					9.80365	21			6.51541	22
												3.5275	26					0.173804	22			6.57378	22
												3.53983	26					0.20137	22			6.59872	22
												4.16697	26					0.238234	22			6.65865	22
												4.17061	26					0.254537	22			6.70534	22
												4.17422	26					0.340102	22			6.75019	22
												4.17872	26					0.563785	22			6.80144	22
												4.18872	26					0.757199	22			6.81974	22
												4.66873	26					0.798855	22			6.82802	22
												4.67324	26					0.827978	22			6.83494	22
												4.67811	26					0.908874	22			7.08599	22
												4.687	26					1.0191	22			7.10077	22
												4.69589	26					1.06833	22			7.10999	22
												4.7212	26					1.07693	22			7.19101	22
												5.59553	26					1.10647	22			7.20792	22
												5.71538	26					1.11814	22			7.22386	22
												6.50382	26					1.14399	22			7.24217	22
												6.50755	26					1.15066	22			7.375	22
												6.5123	26					1.24819	22			7.67516	22
												6.52111	26					1.29955	22			7.80287	22
												6.80296	26					1.33941	22			7.90019	22
												7.45189	26					1.34793	22			7.9636	22
												7.52492	26					1.35399	22			7.97457	22
												7.84813	26					1.38704	22			8.0227	22
												8.49514	26					1.8358	22			8.82994	22
												8.49838	26					1.87234	22			9.03958	22
												8.50669	26					2.00833	22			9.07628	22
												8.5139	26					2.05252	22			9.10745	22
												8.73021	26					2.11482	22			9.11544	22
												8.93255	26					2.12457	22			9.1267	22
												9.06211	26					2.18511	22			9.17045	22
												9.79882	26					2.20436	22			9.1797	22
												9.81307	26					2.25683	22			9.18761	22
												9.87255	26					2.29746	22			9.20637	22
												0.155458	27					2.30803	22			9.6317	22
												0.16148	27					2.36496	22			9.68232	22
												0.169631	27					2.39765	22			9.87529	22
												0.177823	27					2.40617	22			0.0375299	23
												0.269532	27					2.49645	22			0.0788586	23
												0.548061	27					2.5637	22			0.307252	23
												0.556089	27					2.73496	22			0.356814	23
												0.558588	27					2.80176	22			0.418991	23
												0.656646	27					2.83277	22			0.627888	23
												0.792798	27					2.98526	22			0.654962	23
												0.936854	27					3.02995	22			0.676671	23
												1.0379	27					3.24614	22			0.683757	23
												1.29489	27					3.26478	22			0.816386	23
												1.40269	27					3.3127	22			0.879915	23
												1.53237	27					3.33416	22			0.888845	23
												1.55298	27					3.36173	22			0.895357	23
												2.40167	27					3.41129	22			0.916902	23
												3.54069	27					3.52774	22			1.02635	23
												3.54401	27					3.69023	22			1.03323	23
												3.54761	27					3.80332	22			1.04044	23
												3.55765	27					4.13469	22			1.05223	23
												4.43882	27					4.18073	22			1.10593	23
												4.443	27					4.40506	22			1.36329	23
												4.44959	27					4.43288	22			1.48363	23
												4.99436	27					4.5404	22			1.5295	23
												5.35711	27					4.56555	22			1.54716	23
												5.71784	27					4.573	22			1.60008	23
												5.79739	27					4.59729	22			1.63272	23
												7.00219	27					4.60712	22			1.66131	23
												7.48826	27					4.66168	22			1.67974	23
												7.73455	27					4.76265	22			1.69117	23
												8.2169	27					5.13407	22			2.15738	23
												8.98166	27					5.14325	22			2.21902	23
												8.98568	27					5.20158	22			2.25056	23
												8.9899	27					5.38606	22			2.63063	23
												9.02787	27					5.54003	22			2.67131	23
												9.75163	27					5.57423	22			2.69449	23
												9.7552	27					5.58328	22			3.64665	23
												9.76384	27					5.77047	22			3.9552	23
												0.125353	28					5.80611	22			4.11732	23
												0.148864	28					5.87463	22			4.25523	23
												0.161848	28					6.18454	22			4.57001	23
												0.178601	28					6.51541	22			4.61965	23
												0.204693	28					6.57378	22			4.94295	23
												0.218332	28					6.59872	22			4.98006	23
												0.299065	28					6.65865	22			5.79234	23
												0.328638	28					6.70534	22			6.27874	23
												0.625926	28					6.75019	22			6.30479	23
												0.698139	28					6.80144	22			6.39151	23
												0.717718	28					6.81974	22			6.626	23
												0.896877	28					6.82802	22			6.7479	23
												0.92428	28					6.83494	22			6.80168	23
												0.966796	28					7.08599	22			6.82081	23
												1.07567	28					7.10077	22			6.97224	23
												1.10561	28					7.10999	22			7.04646	23
												1.32151	28					7.19101	22			7.10458	23
												1.59111	28					7.20792	22			7.16553	23
												2.27596	28					7.22386	22			7.18671	23
												2.41809	28					7.24217	22			7.20465	23
												2.51173	28					7.375	22			7.21841	23
												2.66324	28					7.67516	22			7.24856	23
												3.16824	28					7.80287	22			7.53753	23
												3.1725	28					7.90019	22			7.63375	23
												3.17774	28					7.9636	22			8.07927	23
												3.19851	28					7.97457	22			8.20817	23
												4.11241	28					8.0227	22			8.55592	23
												5.89913	28					8.82994	22			8.65832	23
												6.0438	28					9.03958	22			8.76822	23
												6.05011	28					9.07628	22			8.93787	23
												6.05437	28					9.10745	22			9.34768	23
												6.06137	28					9.11544	22			9.38098	23
												6.34822	28					9.1267	22			9.44836	23
												6.38631	28					9.17045	22			9.54085	23
												7.3354	28					9.1797	22			9.56592	23
												7.33888	28					9.18761	22			9.62506	23
												7.34224	28					9.20637	22			9.65083	23
												7.3465	28					9.6317	22			9.65791	23
												7.35276	28					9.68232	22			9.68789	23
												8.05154	28					9.87529	22			0.231599	24
												8.05593	28					0.0375299	23			0.666022	24
												8.06031	28					0.0788586	23			0.764899	24
												9.67037	28					0.307252	23			0.88737	24
												9.67557	28					0.356814	23			0.923784	24
												9.68098	28					0.418991	23			0.949384	24
												9.69281	28					0.627888	23			1.11556	24
												0.153902	29					0.654962	23			1.26531	24
												0.161848	29					0.676671	23			1.57964	24
												0.190561	29					0.683757	23			1.60974	24
												0.248684	29					0.816386	23			1.72984	24
												0.267935	29					0.879915	23			1.76576	24
												0.301768	29					0.888845	23			1.84825	24
												0.364765	29					0.895357	23			1.89679	24
												0.519102	29					0.916902	23			1.91932	24
												0.662667	29					1.02635	23			1.93882	24
												0.799761	29					1.03323	23			1.96003	24
												0.944596	29					1.04044	23			1.96818	24
												0.97081	29					1.05223	23			1.97707	24
												1.04925	29					1.10593	23			2.00669	24
												1.11683	29					1.36329	23			2.30426	24
												1.4969	29					1.48363	23			2.34186	24
												1.57641	29					1.5295	23			2.68196	24
												2.41076	29					1.54716	23			3.20862	24
												2.5447	29					1.60008	23			3.23672	24
												3.32499	29					1.63272	23			3.25208	24
												3.32942	29					1.66131	23			3.26031	24
												3.63744	29					1.67974	23			3.28444	24
												3.78706	29					1.69117	23			3.77162	24
												4.30844	29					2.15738	23			3.98957	24
												4.31143	29					2.21902	23			4.36533	24
												4.31451	29					2.25056	23			4.583	24
												4.32327	29					2.63063	23			4.71042	24
												4.33007	29					2.67131	23			4.86623	24
												4.69949	29					2.69449	23			4.94275	24
												5.92276	29					3.64665	23			5.42272	24
												5.92743	29					3.9552	23			5.62383	24
												5.93214	29					4.11732	23			5.72533	24
												5.97274	29					4.25523	23			5.83281	24
												7.95508	29					4.57001	23			5.85051	24
												7.96438	29					4.61965	23			5.85927	24
												8.22288	29					4.94295	23			5.87934	24
												8.55015	29					4.98006	23			5.88671	24
												8.55384	29					5.79234	23			6.51897	24
												8.56301	29					6.27874	23			6.59696	24
												8.56907	29					6.30479	23			6.68781	24
												9.20125	29					6.39151	23			6.84428	24
												9.20432	29					6.626	23			6.94971	24
												9.79833	29					6.7479	23			7.0338	24
												9.80656	29					6.80168	23			7.05727	24
												0.17983	30					6.82081	23			7.08664	24
												0.22079	30					6.97224	23			8.11093	24
												0.256917	30					7.04646	23			9.26551	24
												0.507265	30					7.10458	23			9.43308	24
												0.618431	30					7.16553	23			9.55477	24
												0.93923	30					7.18671	23			9.59106	24
												1.06469	30					7.20465	23			9.76723	24
												1.40507	30					7.21841	23			9.7887	24
												1.47355	30					7.24856	23			9.80836	24
												1.53135	30					7.53753	23			9.82122	24
												1.62359	30					7.63375	23			0.0772612	25
												1.7665	30					8.07927	23			0.861197	25
												1.92874	30					8.20817	23			1.35866	25
												2.56129	30					8.55592	23			1.58099	25
												2.78821	30					8.65832	23			1.79443	25
												2.83277	30					8.76822	23			2.49514	25
												3.8997	30					8.93787	23			2.56325	25
												3.91465	30					9.34768	23			2.58926	25
												3.95557	30					9.38098	23			2.742	25
												4.69441	30					9.44836	23			4.38708	25
												4.69769	30					9.54085	23			4.89728	25
												4.70125	30					9.56592	23			6.25491	25
												4.7058	30					9.62506	23			7.18978	25
												4.71276	30					9.65083	23			7.44234	25
												4.87734	30					9.65791	23			7.53274	25
												5.55547	30					9.68789	23			7.55395	25
												6.12539	30					0.231599	24			7.58508	25
												6.12904	30					0.255151	24			7.9697	25
												6.13293	30					0.260885	24			9.12727	25
												7.06719	30					0.266251	24			9.14399	25
												7.07063	30					0.283331	24			9.846	25
												7.07419	30					0.30291	24			0.220663	26
												7.07931	30					0.308645	24			0.461385	26
												7.71555	30					0.666022	24			0.801559	26
												7.71866	30					0.764899	24			1.03102	26
												7.72206	30					0.88737	24			1.08529	26
												7.73443	30					0.923784	24			1.14087	26
												8.24504	30					0.949384	24			1.17081	26
												8.25036	30					1.11556	24			2.19912	26
												8.2543	30					1.26531	24			2.26842	26
												8.26191	30					1.57964	24			2.43218	26
												8.67496	30					1.60974	24			2.48625	26
												9.88606	30					1.72984	24			2.53585	26
																		1.76576	24			2.62314	26
																		1.84825	24			2.78071	26
																		1.89679	24			3.63198	26
																		1.91932	24			5.08218	26
																		1.93882	24			5.19588	26
																		1.96003	24			6.44127	26
																		1.96818	24			6.7617	26
																		1.97707	24			6.90953	26
																		2.00669	24			6.94303	26
																		2.30426	24			6.98375	26
																		2.34186	24			7.04261	26
																		2.68196	24			7.07632	26
																		3.20862	24			7.27854	26
																		3.23672	24			7.48146	26
																		3.25208	24			7.50939	26
																		3.26031	24			8.03786	26
																		3.28444	24			8.4405	26
																		3.77162	24			8.4663	26
																		3.98957	24			8.53753	26
																		4.36533	24			9.77256	26
																		4.583	24			0.0407248	27
																		4.71042	24			0.175893	27
																		4.86623	24			0.362425	27
																		4.94275	24			0.678678	27
																		5.42272	24			0.749908	27
																		5.62383	24			0.826258	27
																		5.72533	24			0.928166	27
																		5.83281	24			1.46532	27
																		5.85051	24			2.00906	27
																		5.85927	24			2.35161	27
																		5.87934	24			2.68748	27
																		5.88671	24			3.24225	27
																		6.51897	24			3.63121	27
																		6.59696	24			3.87484	27
																		6.68781	24			4.12731	27
																		6.84428	24			4.69494	27
																		6.94971	24			5.54081	27
																		7.0338	24			5.56403	27
																		7.05727	24			5.76408	27
																		7.08664	24			6.17544	27
																		8.11093	24			6.71943	27
[truncated: 228 more rows]

## Sheet: Fig3A 3B 3C 3D
Figure 3A - Sciatic Nerve Stim - Rep PSTH - All			Figure 3B - Sciatic Nerve Stim - Rep Raster - All			Figure 3C - Sciatic Nerve Stim - Rep Raster - Burst			Figure 3D - Sciatic Nerve Stim - Rep Raster - Single
Bin Center	# values		Time (s)	Trial		Time (s)	Trial		Time (s)	Trial
-4.95	20		-4.2714	1		-0.261197	1		-4.2714	1
-4.85	21		-4.06406	1		-0.256446	1		-4.06406	1
-4.75	12		-3.92905	1		-0.252022	1		-3.92905	1
-4.65	26		-3.36569	1		-4.59592	2		-3.36569	1
-4.55	35		-3.03489	1		-4.59007	2		-3.03489	1
-4.45	25		-2.98779	1		-0.33382	2		-2.98779	1
-4.35	25		-2.89964	1		-0.328454	2		-2.89964	1
-4.25	33		-2.59089	1		-0.323088	2		-2.59089	1
-4.15	29		-2.01347	1		8.41247	2		-2.01347	1
-4.05	27		-1.76177	1		8.41645	2		-1.76177	1
-3.95	40		-0.261197	1		8.42042	2		-0.237891	1
-3.85	39		-0.256446	1		8.42587	2		-0.162238	1
-3.75	29		-0.252022	1		-3.84594	3		0.203126	1
-3.65	29		-0.237891	1		-3.84185	3		0.212711	1
-3.55	32		-0.162238	1		-3.83828	3		0.295696	1
-3.45	37		0.203126	1		-3.8337	3		0.367376	1
-3.35	36		0.212711	1		-3.44806	3		1.91522	1
-3.25	18		0.295696	1		-3.44396	3		3.64079	1
-3.15	23		0.367376	1		-3.44015	3		4.12252	1
-3.05	30		1.91522	1		-1.41046	3		4.7635	1
-2.95	22		3.64079	1		-1.4057	3		5.21726	1
-2.85	18		4.12252	1		-1.40087	3		5.53593	1
-2.75	22		4.7635	1		7.73348	3		5.89527	1
-2.65	26		5.21726	1		7.73704	3		5.90719	1
-2.55	23		5.53593	1		7.74048	3		5.9264	1
-2.45	24		5.89527	1		7.7445	3		5.94725	1
-2.35	29		5.90719	1		9.51512	3		6.08365	1
-2.25	21		5.9264	1		9.51934	3		6.21664	1
-2.15	29		5.94725	1		9.52352	3		6.42779	1
-2.05	19		6.08365	1		-3.04898	4		6.55035	1
-1.95	21		6.21664	1		-3.04415	4		7.63243	1
-1.85	22		6.42779	1		-3.03825	4		7.643	1
-1.75	22		6.55035	1		-3.03063	4		7.67867	1
-1.65	27		7.63243	1		-1.04694	4		7.71365	1
-1.55	21		7.643	1		-1.04333	4		7.88134	1
-1.45	25		7.67867	1		-1.03981	4		8.15246	1
-1.35	31		7.71365	1		-1.03563	4		9.01152	1
-1.25	26		7.88134	1		5.16938	4		9.07439	1
-1.15	16		8.15246	1		5.17429	4		9.13661	1
-1.05	29		9.01152	1		5.79484	4		9.57201	1
-0.95	26		9.07439	1		5.7993	4		9.67638	1
-0.85	34		9.13661	1		5.80352	4		9.85181	1
-0.75	28		9.57201	1		5.80884	4		-4.60342	2
-0.65	30		9.67638	1		7.82244	4		-4.57901	2
-0.55	25		9.85181	1		7.82678	4		-4.55951	2
-0.45	32		-4.60342	2		7.83047	4		-4.51617	2
-0.35	26		-4.59592	2		7.8349	4		-3.9608	2
-0.25	29		-4.59007	2		7.84145	4		-3.95125	2
-0.15	37		-4.57901	2		-3.91185	5		-3.94183	2
-0.05	33		-4.55951	2		-3.90747	5		-3.93094	2
0.05	29		-4.51617	2		-3.90357	5		-3.91209	2
0.15	50		-3.9608	2		-3.89784	5		-3.87081	2
0.25	43		-3.95125	2		-2.60125	5		-1.80736	2
0.35	53		-3.94183	2		-2.59666	5		-0.236417	2
0.45	54		-3.93094	2		-2.59252	5		0.331741	2
0.55	42		-3.91209	2		-1.64446	5		0.409606	2
0.65	56		-3.87081	2		-1.63926	5		0.484891	2
0.75	40		-1.80736	2		-0.975091	5		0.621534	2
0.85	50		-0.33382	2		-0.970135	5		1.13407	2
0.95	37		-0.328454	2		-0.965506	5		1.39388	2
1.05	40		-0.323088	2		-0.959813	5		1.57226	2
1.15	31		-0.236417	2		-0.952153	5		2.38798	2
1.25	33		0.331741	2		-3.71757	6		2.44581	2
1.35	27		0.409606	2		-3.71372	6		2.85271	2
1.45	31		0.484891	2		-3.71012	6		3.91522	2
1.55	34		0.621534	2		-3.7057	6		4.01979	2
1.65	24		1.13407	2		-3.70062	6		5.12575	2
1.75	26		1.39388	2		-2.44499	6		5.13333	2
1.85	24		1.57226	2		-2.44007	6		5.69182	2
1.95	28		2.38798	2		7.20333	6		5.69878	2
2.05	25		2.44581	2		7.20829	6		5.70489	2
2.15	27		2.85271	2		7.21259	6		5.952	2
2.25	24		3.91522	2		7.21832	6		6.1722	2
2.35	22		4.01979	2		9.02929	6		6.29312	2
2.45	27		5.12575	2		9.03339	6		7.42288	2
2.55	15		5.13333	2		9.03736	6		7.66876	2
2.65	25		5.69182	2		-4.24625	7		7.71472	2
2.75	25		5.69878	2		-4.24252	7		7.77874	2
2.85	23		5.70489	2		-4.23892	7		8.66081	2
2.95	32		5.952	2		-4.23461	7		8.72586	2
3.05	22		6.1722	2		-4.22822	7		9.23778	2
3.15	16		6.29312	2		-3.80703	7		9.24708	2
3.25	24		7.42288	2		-3.8015	7		9.26698	2
3.35	18		7.66876	2		-3.79691	7		9.29107	2
3.45	18		7.71472	2		-3.79044	7		9.31491	2
3.55	19		7.77874	2		7.70812	7		9.53052	2
3.65	20		8.41247	2		7.71238	7		-3.27263	3
3.75	21		8.41645	2		7.71681	7		-2.92381	3
3.85	19		8.42042	2		7.7234	7		-2.91734	3
3.95	27		8.42587	2		8.9006	7		-2.90587	3
4.05	32		8.66081	2		8.90453	7		-2.89563	3
4.15	33		8.72586	2		8.90825	7		-2.86773	3
4.25	20		9.23778	2		8.91751	7		-2.44548	3
4.35	19		9.24708	2		-0.0670055	8		-2.43028	3
4.45	18		9.26698	2		-0.0611073	8		-2.36642	3
4.55	15		9.29107	2		-0.0565607	8		-2.26816	3
4.65	22		9.31491	2		7.55538	8		-1.34238	3
4.75	19		9.53052	2		7.56038	8		-1.30502	3
4.85	36		-3.84594	3		7.56542	8		-1.16998	3
4.95	24		-3.84185	3		7.57484	8		-0.899683	3
5.05	23		-3.83828	3		9.96187	8		-0.821818	3
5.15	23		-3.8337	3		9.96666	8		-0.635614	3
5.25	32		-3.44806	3		9.97121	8		-0.474436	3
5.35	19		-3.44396	3		-3.64921	9		-0.350081	3
5.45	18		-3.44015	3		-3.64544	9		0.428776	3
5.55	24		-3.27263	3		-3.64168	9		0.481983	3
5.65	25		-2.92381	3		-2.12791	9		0.632061	3
5.75	20		-2.91734	3		-2.12259	9		0.817774	3
5.85	31		-2.90587	3		-2.11771	9		0.933076	3
5.95	34		-2.89563	3		-2.11235	9		1.17773	3
6.05	18		-2.86773	3		-2.10526	9		1.37901	3
6.15	24		-2.44548	3		8.30106	9		1.51844	3
6.25	30		-2.43028	3		8.30663	9		1.57496	3
6.35	16		-2.36642	3		-4.38531	10		2.76854	3
6.45	28		-2.26816	3		-4.38158	10		3.51684	3
6.55	22		-1.41046	3		-4.37793	10		3.80962	3
6.65	19		-1.4057	3		-4.37212	10		3.96535	3
6.75	24		-1.40087	3		-0.855733	10		4.19067	3
6.85	28		-1.34238	3		-0.852088	10		4.34456	3
6.95	27		-1.30502	3		-0.848852	10		4.6926	3
7.05	29		-1.16998	3		-0.844715	10		4.75527	3
7.15	27		-0.899683	3		8.81736	10		5.31163	3
7.25	24		-0.821818	3		8.82117	10		5.52139	3
7.35	24		-0.635614	3		8.82502	10		6.05837	3
7.45	19		-0.474436	3		8.28693	13		6.17654	3
7.55	26		-0.350081	3		8.29078	13		6.31032	3
7.65	34		0.428776	3		8.29439	13		8.00222	3
7.75	30		0.481983	3		8.29893	13		8.06431	3
7.85	21		0.632061	3		-4.08712	14		9.67691	3
7.95	13		0.817774	3		-4.08232	14		9.86451	3
8.05	28		0.933076	3		-0.439023	15		-4.47104	4
8.15	24		1.17773	3		-0.434436	15		-4.46157	4
8.25	27		1.37901	3		-0.428947	15		-4.44077	4
8.35	26		1.51844	3		2.92827	15		-4.41062	4
8.45	28		1.57496	3		2.93289	15		-4.31006	4
8.55	25		2.76854	3		2.9376	15		-3.80044	4
8.65	26		3.51684	3		4.90246	15		-3.7877	4
8.75	31		3.80962	3		4.9068	15		-3.74522	4
8.85	26		3.96535	3		4.91065	15		-3.71168	4
8.95	26		4.19067	3		4.91553	15		-3.02162	4
9.05	26		4.34456	3		6.80907	15		-2.93692	4
9.15	33		4.6926	3		6.81354	15		-2.6076	4
9.25	44		4.75527	3		6.81821	15		-2.5464	4
9.35	18		5.31163	3		8.48692	15		-2.44306	4
9.45	22		5.52139	3		8.49048	15		-1.91951	4
9.55	26		6.05837	3		8.49384	15		-0.763163	4
9.65	20		6.17654	3		8.4988	15		-0.453669	4
9.75	23		6.31032	3		9.80407	15		-0.440439	4
9.85	38		7.73348	3		9.8085	15		-0.423031	4
9.95	23		7.73704	3		9.81272	15		-0.366997	4
			7.74048	3		9.81817	15		0.132183	4
			7.7445	3		-4.20203	16		0.313391	4
			8.00222	3		-4.19605	16		0.361191	4
			8.06431	3		-4.18941	16		0.516307	4
			9.51512	3		-1.34359	16		0.674864	4
			9.51934	3		-1.34019	16		0.781196	4
			9.52352	3		-1.33695	16		0.950607	4
			9.67691	3		-1.33294	16		1.23475	4
			9.86451	3		5.23362	16		1.59815	4
			-4.47104	4		5.23874	16		1.95438	4
			-4.46157	4		5.243	16		2.18662	4
			-4.44077	4		6.23645	16		2.92386	4
			-4.41062	4		6.2403	16		2.97215	4
			-4.31006	4		6.24395	16		3.04137	4
			-3.80044	4		6.24845	16		3.17679	4
			-3.7877	4		8.11164	16		3.44426	4
			-3.74522	4		8.11537	16		3.86254	4
			-3.71168	4		8.11906	16		4.05932	4
			-3.04898	4		8.12344	16		5.18482	4
			-3.04415	4		9.25185	16		5.21898	4
			-3.03825	4		9.25595	16		5.28615	4
			-3.03063	4		9.25947	16		5.82068	4
			-3.02162	4		9.26484	16		5.83461	4
			-2.93692	4		9.27147	16		5.85759	4
			-2.6076	4		-2.77559	17		6.06554	4
			-2.5464	4		-2.77125	17		6.65914	4
			-2.44306	4		-2.76752	17		6.67687	4
			-1.91951	4		-2.76265	17		6.73196	4
			-1.04694	4		0.140275	17		7.92697	4
			-1.04333	4		0.145109	17		8.28939	4
			-1.03981	4		0.149737	17		8.29598	4
			-1.03563	4		4.09686	17		8.30225	4
			-0.763163	4		4.1012	17		8.31216	4
			-0.453669	4		4.10595	17		9.17318	4
			-0.440439	4		8.14949	17		9.18269	4
			-0.423031	4		8.15445	17		9.19375	4
			-0.366997	4		8.15883	17		9.21013	4
			0.132183	4		8.16653	17		9.24142	4
			0.313391	4		-4.88184	19		9.31712	4
			0.361191	4		-4.87861	19		-3.86626	5
			0.516307	4		-4.87554	19		-3.15925	5
			0.674864	4		-4.87197	19		-2.33194	5
			0.781196	4		-4.86726	19		-1.5788	5
			0.950607	4		-3.87381	19		-0.940644	5
			1.23475	4		-3.86972	19		0.104003	5
			1.59815	4		-3.86595	19		0.115963	5
			1.95438	4		-3.86083	19		0.12649	5
			2.18662	4		-3.85514	19		0.20243	5
			2.92386	4		-0.845511	19		0.337721	5
			2.97215	4		-0.841251	19		0.433568	5
			3.04137	4		-0.837401	19		0.493943	5
			3.17679	4		-0.831257	19		0.660241	5
			3.44426	4		6.5391	19		0.862052	5
			3.86254	4		6.54349	19		0.976699	5
			4.05932	4		6.54734	19		1.45905	5
			5.16938	4		6.55336	19		1.7585	5
			5.17429	4		7.71814	19		2.03228	5
			5.18482	4		7.72215	19		2.28861	5
			5.21898	4		7.72625	19		2.45311	5
			5.28615	4		8.19762	19		2.63419	5
			5.79484	4		8.20311	19		2.99292	5
			5.7993	4		8.21064	19		3.11731	5
			5.80352	4		-3.73013	20		3.24859	5
			5.80884	4		-3.72464	20		4.38831	5
			5.82068	4		5.39435	20		5.47228	5
			5.83461	4		5.39923	20		6.83678	5
			5.85759	4		5.40369	20		7.18621	5
			6.06554	4		5.41098	20		7.49759	5
			6.65914	4		7.10312	24		7.65823	5
			6.67687	4		7.10775	24		8.59528	5
			6.73196	4		7.11238	24		9.16139	5
			7.82244	4		7.12016	24		9.18396	5
			7.82678	4		-0.164263	25		9.20014	5
			7.83047	4		-0.160003	25		9.25179	5
			7.8349	4		-0.15603	25		9.30684	5
			7.84145	4		-0.151279	25		9.49517	5
			7.92697	4		-3.677	27		9.67925	5
			8.28939	4		-3.67241	27		-3.6898	6
			8.29598	4		-3.66762	27		-3.56127	6
			8.30225	4		-3.6589	27		-2.39571	6
			8.31216	4		-1.93583	27		-2.23892	6
			9.17318	4		-1.93026	27		-1.76374	6
			9.18269	4		-1.92571	27		-1.55025	6
			9.19375	4		-4.20498	32		-1.34762	6
			9.21013	4		-4.20104	32		-1.05353	6
			9.24142	4		-4.19756	32		-1.0319	6
			9.31712	4		-4.19318	32		-1.01081	6
			-3.91185	5		-4.18478	32		-0.875763	6
			-3.90747	5		0.113079	32		-0.387109	6
			-3.90357	5		0.118814	32		-0.288477	6
			-3.89784	5		4.03112	32		-0.23187	6
			-3.86626	5		4.03571	32		-0.0413235	6
			-3.15925	5		4.03992	32		0.285784	6
			-2.60125	5		4.04554	32		0.364673	6
			-2.59666	5		4.05184	32		0.624852	6
			-2.59252	5		5.83451	32		0.853573	6
			-2.33194	5		5.83942	32		1.04781	6
			-1.64446	5		5.84377	32		1.42501	6
			-1.63926	5		5.8511	32		1.50259	6
			-1.5788	5		-0.215398	34		1.68371	6
			-0.975091	5		-0.210647	34		1.89302	6
			-0.970135	5		6.72853	34		2.09548	6
			-0.965506	5		6.73213	34		2.53617	6
			-0.959813	5		6.73537	34		2.689	6
			-0.952153	5		6.74028	34		2.91677	6
			-0.940644	5		6.74762	34		3.06517	6
			0.104003	5		-3.64552	35		3.64074	6
			0.115963	5		-3.64003	35		3.73888	6
			0.12649	5		-3.63483	35		3.79611	6
			0.20243	5		-0.0359517	41		3.87381	6
			0.337721	5		-0.030545	41		4.23745	6
			0.433568	5		-0.024401	41		4.37131	6
			0.493943	5		4.63493	41		5.21693	6
			0.660241	5		4.63858	41		6.13259	6
			0.862052	5		4.6419	41		6.16651	6
			0.976699	5		4.64616	41		6.23049	6
			1.45905	5		5.22546	41		6.29475	6
			1.7585	5		5.22922	41		7.31761	6
			2.03228	5		5.23283	41		7.3752	6
			2.28861	5		5.2368	41		7.6944	6
			2.45311	5		5.24245	41		8.17191	6
			2.63419	5		6.97269	41		9.09466	6
			2.99292	5		6.97646	41		9.13136	6
			3.11731	5		6.97978	41		9.22291	6
			3.24859	5		6.98613	41		9.37708	6
			4.38831	5		8.00575	41		-3.78237	7
			5.47228	5		8.00992	41		-3.75567	7
			6.83678	5		8.01394	41		-3.73719	7
			7.18621	5		8.01844	41		-2.95789	7
			7.49759	5		-4.53366	42		-2.65642	7
			7.65823	5		-4.52862	42		-2.46997	7
			8.59528	5		-4.52452	42		-2.0994	7
			9.16139	5		-4.51846	42		-1.41816	7
			9.18396	5		-3.87293	42		-1.40714	7
			9.20014	5		-3.8681	42		-1.39718	7
			9.25179	5		-3.8633	42		-1.384	7
			9.30684	5		-3.85454	42		-1.36937	7
			9.49517	5		-3.0176	42		-1.34107	7
			9.67925	5		-3.01375	42		-1.31232	7
			-3.71757	6		-3.0097	42		-1.24018	7
			-3.71372	6		-1.89017	42		-1.08802	7
			-3.71012	6		-1.88624	42		-0.868513	7
			-3.7057	6		-1.88256	42		0.152664	7
			-3.70062	6		-1.00884	43		0.339605	7
			-3.6898	6		-1.00421	43		0.489028	7
			-3.56127	6		-0.999456	43		0.682482	7
			-2.44499	6		-0.993927	43		0.754982	7
			-2.44007	6		-0.988151	43		0.846241	7
			-2.39571	6		3.82388	43		1.03089	7
			-2.23892	6		3.82855	43		1.18998	7
			-1.76374	6		3.83298	43		1.27972	7
			-1.55025	6		-4.19418	44		1.37807	7
			-1.34762	6		-4.18853	44		1.64091	7
			-1.05353	6		-4.18005	44		1.83567	7
			-1.0319	6		4.46671	45		1.96531	7
			-1.01081	6		4.47027	45		2.121	7
			-0.875763	6		4.47384	45		2.5306	7
			-0.387109	6		4.48072	45		3.08737	7
			-0.288477	6		6.46864	45		3.32953	7
			-0.23187	6		6.47208	45		3.5757	7
			-0.0413235	6		6.47519	45		4.56181	7
			0.285784	6		6.47879	45		4.81335	7
			0.364673	6		7.00087	45		6.15705	7
			0.624852	6		7.00644	45		6.77042	7
			0.853573	6		7.69318	45		6.98489	7
			1.04781	6		7.69773	45		7.74912	7
			1.42501	6		7.70272	45		7.79328	7
			1.50259	6		7.7119	45		9.3292	7
			1.68371	6		0.171184	49		9.35877	7
			1.89302	6		0.175239	49		9.95499	7
			2.09548	6		0.179703	49		-3.94847	8
			2.53617	6		-3.17472	50		-3.29519	8
			2.689	6		-3.16874	50		-2.67375	8
			2.91677	6		-3.1624	50		-2.58638	8
			3.06517	6		-2.52407	52		-2.02035	8
			3.64074	6		-2.51908	52		-1.25853	8
			3.73888	6		-2.51453	52		-1.24817	8
			3.79611	6		-2.50822	52		-1.20176	8
			3.87381	6		4.10923	53		-1.02121	8
			4.23745	6		4.11427	53		-0.0105215	8
			4.37131	6		4.11919	53		0.340466	8
			5.21693	6		4.12541	53		0.438401	8
			6.13259	6		9.45191	53		0.508894	8
			6.16651	6		9.45674	53		0.698334	8
			6.23049	6		9.46124	53		0.814907	8
			6.29475	6		9.46763	53		0.902438	8
			7.20333	6		-4.61498	54		0.984399	8
			7.20829	6		-4.61117	54		1.08791	8
			7.21259	6		-4.60728	54		1.2644	8
			7.21832	6		-4.60106	54		1.3609	8
			7.31761	6		-3.95798	54		1.5034	8
			7.3752	6		-3.95409	54		1.62379	8
			7.6944	6		-3.9504	54		1.83965	8
			8.17191	6		-3.94561	54		2.13829	8
			9.02929	6		-3.93676	54		2.3034	8
			9.03339	6		4.00225	54		2.54949	8
			9.03736	6		4.00814	54		2.85406	8
			9.09466	6		4.01269	54		3.49136	8
			9.13136	6		4.01883	54		3.64861	8
			9.22291	6		4.8169	55		4.11121	8
			9.37708	6		4.82243	55		4.69489	8
			-4.24625	7		4.82804	55		4.99939	8
			-4.24252	7		4.83787	55		5.24802	8
			-4.23892	7		5.62042	55		6.55714	8
			-4.23461	7		5.6259	55		6.60515	8
			-4.22822	7		7.63504	55		6.66049	8
			-3.80703	7		7.63959	55		6.8197	8
			-3.8015	7		7.64389	55		7.60212	8
			-3.79691	7		7.65228	55		7.6441	8
			-3.79044	7		9.12705	55		7.7184	8
			-3.78237	7		9.1309	55		8.22451	8
			-3.75567	7		9.13447	55		8.25064	8
			-3.73719	7		9.14049	55		8.73585	8
			-2.95789	7		9.7811	55		9.11269	8
			-2.65642	7		9.78479	55		9.14193	8
			-2.46997	7		9.79306	55		-3.44384	9
			-2.0994	7		9.79872	55		-2.7614	9
			-1.41816	7		-4.90465	56		-1.71987	9
			-1.40714	7		-4.89994	56		-1.50872	9
			-1.39718	7		0.0967409	56		-1.45183	9
			-1.384	7		0.101451	56		-0.773444	9
			-1.36937	7		0.105711	56		-0.676	9
			-1.34107	7		5.94916	56		-0.448999	9
			-1.31232	7		5.95412	56		-0.190705	9
			-1.24018	7		5.95916	56		0.548912	9
			-1.08802	7		5.96481	56		0.636894	9
			-0.868513	7		8.81387	56		0.844234	9
			0.152664	7		8.81793	56		1.03847	9
			0.339605	7		8.82173	56		1.22209	9
			0.489028	7		8.82669	56		1.41362	9
			0.682482	7		8.83509	56		1.51266	9
			0.754982	7		-4.36644	57		1.60978	9
			0.846241	7		-4.36279	57		1.69649	9
			1.03089	7		-4.35575	57		1.98071	9
			1.18998	7		-4.35095	57		2.27784	9
			1.27972	7		-4.34444	57		2.49779	9
			1.37807	7		-3.33875	57		2.60511	9
			1.64091	7		-3.33486	57		2.81585	9
			1.83567	7		-3.33137	57		3.20202	9
			1.96531	7		-3.32679	57		3.94803	9
			2.121	7		-3.32011	57		4.35738	9
			2.5306	7					4.96707	9
			3.08737	7					5.00087	9
			3.32953	7					5.09663	9
			3.5757	7					5.52044	9
			4.56181	7					5.54002	9
			4.81335	7					5.62948	9
			6.15705	7					5.76457	9
			6.77042	7					6.32666	9
			6.98489	7					8.33375	9
			7.70812	7					8.50033	9
			7.71238	7					8.59212	9
			7.71681	7					8.68678	9
			7.7234	7					8.99472	9
			7.74912	7					9.71566	9
			7.79328	7					-4.35954	10
			8.9006	7					-4.02088	10
			8.90453	7					-2.33439	10
			8.90825	7					-0.709997	10
			8.91751	7					-0.510562	10
			9.3292	7					-0.206065	10
			9.35877	7					-0.191442	10
			9.95499	7					-0.150687	10
			-3.94847	8					-0.115297	10
			-3.29519	8					0.0341659	10
			-2.67375	8					0.274479	10
			-2.58638	8					0.403298	10
			-2.02035	8					0.481409	10
			-1.25853	8					0.546659	10
			-1.24817	8					0.695426	10
			-1.20176	8					0.802127	10
			-1.02121	8					1.01459	10
			-0.0670055	8					1.10826	10
			-0.0611073	8					1.2737	10
			-0.0565607	8					1.46163	10
			-0.0105215	8					1.73258	10
			0.340466	8					1.93111	10
			0.438401	8					2.39216	10
			0.508894	8					2.57873	10
			0.698334	8					2.8446	10
			0.814907	8					2.96146	10
			0.902438	8					3.10314	10
			0.984399	8					3.2225	10
			1.08791	8					4.18797	10
			1.2644	8					4.44794	10
			1.3609	8					5.05592	10
			1.5034	8					5.14103	10
			1.62379	8					5.31274	10
			1.83965	8					5.68256	10
			2.13829	8					6.10851	10
			2.3034	8					6.69776	10
			2.54949	8					7.11777	10
			2.85406	8					8.88294	10
			3.49136	8					9.16417	10
			3.64861	8					9.18494	10
			4.11121	8					9.53585	10
			4.69489	8					9.79262	10
			4.99939	8					-4.91517	11
			5.24802	8					-4.64667	11
			6.55714	8					-4.3244	11
			6.60515	8					-4.24743	11
			6.66049	8					-4.15085	11
			6.8197	8					-4.00253	11
			7.55538	8					-3.50167	11
			7.56038	8					-3.43511	11
			7.56542	8					-3.32309	11
			7.57484	8					-3.07606	11
			7.60212	8					-1.35696	11
			7.6441	8					-1.04476	11
			7.7184	8					-0.737891	11
			8.22451	8					-0.510522	11
			8.25064	8					-0.16744	11
			8.73585	8					-0.101453	11
			9.11269	8					0.0371151	11
			9.14193	8					0.259733	11
			9.96187	8					0.324082	11
			9.96666	8					0.472685	11
			9.97121	8					0.551861	11
			-3.64921	9					0.683506	11
			-3.64544	9					0.895516	11
			-3.64168	9					1.06243	11
			-3.44384	9					1.11408	11
			-2.7614	9					1.20616	11
			-2.12791	9					1.30049	11
			-2.12259	9					1.5571	11
			-2.11771	9					1.77583	11
			-2.11235	9					2.11068	11
			-2.10526	9					2.29529	11
			-1.71987	9					2.7035	11
			-1.50872	9					2.96601	11
			-1.45183	9					3.33866	11
			-0.773444	9					3.62051	11
			-0.676	9					3.80438	11
			-0.448999	9					4.2035	11
			-0.190705	9					4.60228	11
			0.548912	9					4.85927	11
			0.636894	9					5.0363	11
			0.844234	9					5.11334	11
			1.03847	9					5.20276	11
			1.22209	9					5.3566	11
			1.41362	9					5.52442	11
			1.51266	9					5.68187	11
			1.60978	9					5.85845	11
			1.69649	9					6.23938	11
			1.98071	9					6.52487	11
			2.27784	9					6.59974	11
			2.49779	9					6.98411	11
			2.60511	9					7.13669	11
			2.81585	9					7.29393	11
			3.20202	9					7.39203	11
			3.94803	9					7.52266	11
			4.35738	9					7.56403	11
			4.96707	9					7.67294	11
			5.00087	9					8.71328	11
			5.09663	9					8.79746	11
			5.52044	9					9.29287	11
			5.54002	9					9.5331	11
			5.62948	9					9.69342	11
			5.76457	9					-4.90226	12
			6.32666	9					-4.73109	12
			8.30106	9					-4.33476	12
			8.30663	9					-4.25075	12
			8.33375	9					-4.20693	12
			8.50033	9					-4.15822	12
			8.59212	9					-3.00311	12
			8.68678	9					-2.91762	12
			8.99472	9					-2.48205	12
			9.71566	9					-2.38404	12
			-4.38531	10					-2.17322	12
			-4.38158	10					-1.82608	12
			-4.37793	10					-1.74903	12
			-4.37212	10					-0.949245	12
			-4.35954	10					-0.854218	12
			-4.02088	10					-0.675755	12
			-2.33439	10					-0.387109	12
			-0.855733	10					-0.181776	12
			-0.852088	10					-0.0966197	12
			-0.848852	10					0.0360092	12
			-0.844715	10					0.318593	12
			-0.709997	10					0.594705	12
			-0.510562	10					0.685022	12
			-0.206065	10					0.730897	12
			-0.191442	10					0.762355	12
			-0.150687	10					1.07795	12
			-0.115297	10					1.20468	12
			0.0341659	10					1.38605	12
			0.274479	10					1.51549	12
			0.403298	10					1.63181	12
			0.481409	10					1.86934	12
			0.546659	10					1.95741	12
			0.695426	10					2.05071	12
			0.802127	10					2.12481	12
			1.01459	10					2.96335	12
			1.10826	10					3.003	12
			1.2737	10					3.22512	12
			1.46163	10					3.35873	12
			1.73258	10					3.9869	12
			1.93111	10					4.53478	12
			2.39216	10					4.70882	12
			2.57873	10					4.85062	12
			2.8446	10					5.00267	12
			2.96146	10					5.2223	12
			3.10314	10					6.0297	12
			3.2225	10					6.11932	12
			4.18797	10					6.23835	12
			4.44794	10					6.35955	12
			5.05592	10					7.00148	12
			5.14103	10					7.38712	12
			5.31274	10					7.52839	12
			5.68256	10					9.61056	12
			6.10851	10					9.61883	12
			6.69776	10					9.63599	12
			7.11777	10					9.70108	12
			8.81736	10					9.82797	12
			8.82117	10					9.96605	12
			8.82502	10					-4.29495	13
			8.88294	10					-4.26791	13
			9.16417	10					-4.22896	13
			9.18494	10					-4.15073	13
			9.53585	10					-4.03964	13
			9.79262	10					-3.6529	13
			-4.91517	11					-2.85307	13
			-4.64667	11					-2.13066	13
			-4.3244	11					-1.47804	13
			-4.24743	11					-1.08105	13
			-4.15085	11					-0.904722	13
			-4.00253	11					-0.301666	13
			-3.50167	11					-0.29503	13
			-3.43511	11					-0.288682	13
			-3.32309	11					-0.252882	13
			-3.07606	11					-0.203444	13
			-1.35696	11					-0.119598	13
			-1.04476	11					-0.0676609	13
			-0.737891	11					0.0142184	13
			-0.510522	11					0.0899536	13
			-0.16744	11					0.234297	13
			-0.101453	11					0.38929	13
			0.0371151	11					0.572054	13
			0.259733	11					0.684285	13
			0.324082	11					0.866885	13
			0.472685	11					0.953065	13
			0.551861	11					1.13214	13
			0.683506	11					1.30495	13
			0.895516	11					1.65266	13
			1.06243	11					1.78267	13
			1.11408	11					1.84628	13
			1.20616	11					1.95913	13
			1.30049	11					2.47625	13
			1.5571	11					2.5682	13
			1.77583	11					2.68019	13
			2.11068	11					2.8822	13
			2.29529	11					3.20132	13
			2.7035	11					3.49333	13
			2.96601	11					3.75867	13
			3.33866	11					3.97711	13
			3.62051	11					4.84239	13
			3.80438	11					4.85341	13
			4.2035	11					4.87	13
			4.60228	11					4.88433	13
			4.85927	11					5.00381	13
			5.0363	11					5.07906	13
			5.11334	11					5.49169	13
			5.20276	11					5.79783	13
			5.3566	11					5.96531	13
			5.52442	11					6.2941	13
			5.68187	11					6.84899	13
			5.85845	11					6.9629	13
			6.23938	11					8.31589	13
			6.52487	11					8.37389	13
			6.59974	11					8.4663	13
			6.98411	11					8.5782	13
			7.13669	11					8.81265	13
			7.29393	11					8.83154	13
			7.39203	11					8.84878	13
			7.52266	11					8.91161	13
			7.56403	11					8.9939	13
			7.67294	11					9.17593	13
			8.71328	11					9.29168	13
			8.79746	11					9.84341	13
			9.29287	11					9.85124	13
			9.5331	11					9.86013	13
			9.69342	11					9.88216	13
			-4.90226	12					9.92701	13
			-4.73109	12					-4.96899	14
			-4.33476	12					-4.09318	14
			-4.25075	12					-4.06655	14
			-4.20693	12					-4.02519	14
			-4.15822	12					-3.99107	14
			-3.00311	12					-3.96108	14
			-2.91762	12					-3.82223	14
			-2.48205	12					-2.93184	14
			-2.38404	12					-2.4227	14
			-2.17322	12					-1.29155	14
			-1.82608	12					-0.920327	14
			-1.74903	12					-0.777704	14
			-0.949245	12					-0.130043	14
			-0.854218	12					-0.119353	14
			-0.675755	12					-0.0609844	14
			-0.387109	12					0.197023	14
			-0.181776	12					0.310442	14
			-0.0966197	12					0.436435	14
			0.0360092	12					0.566565	14
			0.318593	12					0.739622	14
			0.594705	12					0.861929	14
			0.685022	12					0.969859	14
			0.730897	12					1.12223	14
			0.762355	12					1.4665	14
			1.07795	12					2.33248	14
			1.20468	12					2.60523	14
			1.38605	12					2.77411	14
			1.51549	12					3.47694	14
			1.63181	12					3.56738	14
			1.86934	12					4.48202	14
			1.95741	12					4.70476	14
			2.05071	12					4.96216	14
			2.12481	12					5.29385	14
			2.96335	12					5.42148	14
			3.003	12					5.68244	14
			3.22512	12					5.91636	14
			3.35873	12					6.03761	14
			3.9869	12					6.90572	14
			4.53478	12					7.08967	14
			4.70882	12					7.20079	14
			4.85062	12					7.74343	14
			5.00267	12					8.08975	14
			5.2223	12					8.12149	14
			6.0297	12					8.15492	14
			6.11932	12					8.2223	14
			6.23835	12					8.62686	14
			6.35955	12					8.89359	14
			7.00148	12					9.50517	14
			7.38712	12					-4.54347	15
			7.52839	12					-4.45647	15
			9.61056	12					-4.1011	15
			9.61883	12					-3.88164	15
			9.63599	12					-3.53499	15
			9.70108	12					-3.31508	15
			9.82797	12					-2.87603	15
			9.96605	12					-2.86067	15
			-4.29495	13					-2.82618	15
			-4.26791	13					-2.66029	15
			-4.22896	13					-2.4851	15
			-4.15073	13					-2.36718	15
			-4.03964	13					-2.11556	15
			-3.6529	13					-1.95827	15
			-2.85307	13					-0.40945	15
			-2.13066	13					-0.386103	15
			-1.47804	13					-0.364804	15
			-1.08105	13					-0.232871	15
			-0.904722	13					-0.0282344	15
			-0.301666	13					0.183652	15
			-0.29503	13					0.318452	15
			-0.288682	13					0.407172	15
			-0.252882	13					0.61443	15
			-0.203444	13					0.824637	15
			-0.119598	13					1.0672	15
			-0.0676609	13					1.41327	15
			0.0142184	13					1.62516	15
			0.0899536	13					2.08154	15
			0.234297	13					2.94817	15
			0.38929	13					3.02997	15
			0.572054	13					3.20221	15
			0.684285	13					3.37121	15
			0.866885	13					3.5604	15
			0.953065	13					3.65109	15
			1.13214	13					4.93339	15
			1.30495	13					4.96587	15
			1.65266	13					5.0695	15
			1.78267	13					5.12508	15
			1.84628	13					5.58908	15
			1.95913	13					5.61029	15
			2.47625	13					5.64007	15
			2.5682	13					6.85917	15
			2.68019	13					6.9202	15
			2.8822	13					6.97897	15
			3.20132	13					7.15695	15
			3.49333	13					8.62881	15
			3.75867	13					-4.93673	16
			3.97711	13					-4.20883	16
			4.84239	13					-4.18114	16
			4.85341	13					-4.09262	16
			4.87	13					-3.68151	16
			4.88433	13					-0.686258	16
			5.00381	13					-0.67991	16
			5.07906	13					-0.671963	16
			5.49169	13					-0.657709	16
			5.79783	13					-0.587627	16
			5.96531	13					-0.533109	16
			6.2941	13					-0.424032	16
			6.84899	13					0.00137978	16
			6.9629	13					0.12299	16
			8.28693	13					0.280441	16
			8.29078	13					0.415773	16
			8.29439	13					0.513258	16
			8.29893	13					0.56667	16
			8.31589	13					0.686274	16
			8.37389	13					0.789329	16
			8.4663	13					1.0174	16
			8.5782	13					1.31022	16
			8.81265	13					1.91246	16
			8.83154	13					1.98635	16
			8.84878	13					2.19021	16
			8.91161	13					2.352	16
			8.9939	13					2.9154	16
			9.17593	13					3.97381	16
			9.29168	13					5.25591	16
			9.84341	13					5.30485	16
			9.85124	13					6.25898	16
			9.86013	13					6.33295	16
			9.88216	13					6.43257	16
			9.92701	13					8.1864	16
			-4.96899	14					8.35114	16
			-4.09318	14					9.28187	16
			-4.08712	14					9.77098	16
			-4.08232	14					9.8334	16
			-4.06655	14					9.88051	16
			-4.02519	14					-4.65345	17
			-3.99107	14					-4.43214	17
			-3.96108	14					-4.29263	17
			-3.82223	14					-2.75171	17
			-2.93184	14					-2.6557	17
			-2.4227	14					-2.5855	17
			-1.29155	14					-2.43972	17
			-0.920327	14					-1.82229	17
			-0.777704	14					-1.45963	17
			-0.130043	14					-1.44664	17
			-0.119353	14					-1.40286	17
			-0.0609844	14					-0.681097	17
			0.197023	14					-0.658938	17
			0.310442	14					-0.626375	17
			0.436435	14					0.185864	17
			0.566565	14					0.241898	17
			0.739622	14					0.346059	17
			0.861929	14					0.430314	17
			0.969859	14					0.550122	17
			1.12223	14					0.769832	17
			1.4665	14					1.14011	17
			2.33248	14					1.83307	17
			2.60523	14					2.38292	17
			2.77411	14					2.84049	17
			3.47694	14					4.16493	17
			3.56738	14					4.20659	17
			4.48202	14					4.26209	17
			4.70476	14					4.87789	17
			4.96216	14					5.8613	17
			5.29385	14					5.90004	17
			5.42148	14					6.65068	17
			5.68244	14					6.69348	17
			5.91636	14					7.07814	17
			6.03761	14					7.1132	17
			6.90572	14					7.14396	17
			7.08967	14					7.43904	17
			7.20079	14					7.57453	17
			7.74343	14					8.22125	17
			8.08975	14					8.26139	17
			8.12149	14					8.44612	17
			8.15492	14					8.59014	17
			8.2223	14					8.73858	17
			8.62686	14					8.87453	17
			8.89359	14					9.06335	17
			9.50517	14					9.35433	17
			-4.54347	15					9.43494	17
			-4.45647	15					-4.04818	18
			-4.1011	15					-4.04052	18
			-3.88164	15					-3.97163	18
			-3.53499	15					-3.87656	18
			-3.31508	15					-3.71247	18
			-2.87603	15					-3.54388	18
			-2.86067	15					-2.32622	18
			-2.82618	15					-2.31913	18
			-2.66029	15					-2.31061	18
			-2.4851	15					-2.29845	18
			-2.36718	15					-2.28092	18
			-2.11556	15					-2.235	18
			-1.95827	15					-2.13784	18
			-0.439023	15					-1.67041	18
			-0.434436	15					-1.65554	18
			-0.428947	15					-1.64489	18
			-0.40945	15					-1.5712	18
			-0.386103	15					-1.4276	18
			-0.364804	15					-0.739056	18
			-0.232871	15					-0.732298	18
			-0.0282344	15					-0.72472	18
			0.183652	15					-0.706247	18
			0.318452	15					-0.677288	18
			0.407172	15					-0.607656	18
			0.61443	15					-0.47429	18
			0.824637	15					-0.0996278	18
			1.0672	15					0.263934	18
			1.41327	15					0.362812	18
			1.62516	15					0.490362	18
			2.08154	15					0.620615	18
			2.92827	15					0.811939	18
			2.93289	15					1.06778	18
			2.9376	15					1.27094	18
			2.94817	15					1.64789	18
			3.02997	15					2.16395	18
			3.20221	15					2.28491	18
			3.37121	15					2.51023	18
			3.5604	15					2.71884	18
			3.65109	15					3.06085	18
			4.90246	15					3.74251	18
			4.9068	15					3.9664	18
			4.91065	15					4.36011	18
			4.91553	15					4.55475	18
			4.93339	15					4.77368	18
			4.96587	15					4.94272	18
			5.0695	15					5.15531	18
			5.12508	15					5.60845	18
			5.58908	15					5.62713	18
			5.61029	15					5.68021	18
			5.64007	15					5.84831	18
			6.80907	15					6.00306	18
			6.81354	15					6.20626	18
			6.81821	15					6.35179	18
			6.85917	15					6.94465	18
			6.9202	15					6.96153	18
			6.97897	15					7.016	18
			7.15695	15					7.07908	18
			8.48692	15					7.25562	18
			8.49048	15					7.42253	18
			8.49384	15					7.59161	18
			8.4988	15					8.26217	18
			8.62881	15					8.3912	18
			9.80407	15					8.57449	18
			9.8085	15					8.70065	18
			9.81272	15					9.02866	18
			9.81817	15					9.11488	18
			-4.93673	16					-4.42268	19
			-4.20883	16					-3.3646	19
			-4.20203	16					-2.49866	19
			-4.19605	16					-2.47146	19
			-4.18941	16					-2.43521	19
			-4.18114	16					-2.32601	19
			-4.09262	16					-2.0377	19
			-3.68151	16					-0.0177076	19
			-1.34359	16					-0.00926985	19
			-1.34019	16					0.0250957	19
			-1.33695	16					0.0636801	19
			-1.33294	16					0.226046	19
			-0.686258	16					0.288879	19
			-0.67991	16					0.331764	19
			-0.671963	16					0.58584	19
			-0.657709	16					0.731043	19
			-0.587627	16					0.897177	19
			-0.533109	16					1.00363	19
			-0.424032	16					1.14781	19
			0.00137978	16					1.25406	19
			0.12299	16					1.34037	19
			0.280441	16					1.43101	19
			0.415773	16					1.56532	19
			0.513258	16					1.78929	19
			0.56667	16					1.9689	19
			0.686274	16					2.43892	19
			0.789329	16					2.62909	19
			1.0174	16					2.79445	19
			1.31022	16					3.01817	19
			1.91246	16					3.25881	19
			1.98635	16					3.714	19
			2.19021	16					3.91004	19
			2.352	16					4.26967	19
			2.9154	16					5.51293	19
			3.97381	16					5.79031	19
			5.23362	16					6.91942	19
			5.23874	16					7.79986	19
			5.243	16					8.70897	19
			5.25591	16					8.71953	19
			5.30485	16					8.74194	19
			6.23645	16					9.40521	19
			6.2403	16					9.42761	19
			6.24395	16					9.46931	19
			6.24845	16					9.52911	19
			6.25898	16					-3.69085	20
			6.33295	16					-2.89839	20
			6.43257	16					-2.45311	20
			8.11164	16					-2.39106	20
			8.11537	16					-2.32769	20
			8.11906	16					-2.24213	20
			8.12344	16					-2.107	20
			8.1864	16					-1.61818	20
			8.35114	16					-1.22808	20
			9.25185	16					-1.21157	20
			9.25595	16					-1.16779	20
			9.25947	16					-0.907074	20
			9.26484	16					-0.656276	20
			9.27147	16					-0.430381	20
			9.28187	16					-0.159716	20
			9.77098	16					-0.145503	20
			9.8334	16					-0.130839	20
			9.88051	16					0.0879285	20
			-4.65345	17					0.196063	20
			-4.43214	17					0.245584	20
			-4.29263	17					0.365065	20
			-2.77559	17					0.485405	20
			-2.77125	17					0.592844	20
			-2.76752	17					0.704952	20
			-2.76265	17					0.795514	20
			-2.75171	17					0.846346	20
			-2.6557	17					0.930519	20
			-2.5855	17					1.06561	20
			-2.43972	17					1.36597	20
			-1.82229	17					1.47258	20
			-1.45963	17					1.61009	20
			-1.44664	17					2.2473	20
			-1.40286	17					2.52292	20
			-0.681097	17					2.78151	20
			-0.658938	17					3.05156	20
			-0.626375	17					3.23043	20
			0.140275	17					4.06446	20
			0.145109	17					5.42966	20
			0.149737	17					5.46255	20
			0.185864	17					5.53714	20
			0.241898	17					5.67947	20
			0.346059	17					6.24161	20
			0.430314	17					6.47533	20
			0.550122	17					7.4512	20
			0.769832	17					7.63335	20
			1.14011	17					8.49745	20
			1.83307	17					8.52477	20
			2.38292	17					8.62725	20
			2.84049	17					8.71978	20
			4.09686	17					9.78945	20
			4.1012	17					9.84479	20
			4.10595	17					-4.95786	21
			4.16493	17					-4.63457	21
			4.20659	17					-4.1693	21
			4.26209	17					-4.00259	21
			4.87789	17					-3.78874	21
			5.8613	17					-3.50538	21
			5.90004	17					-1.93583	21
			6.65068	17					-1.52676	21
			6.69348	17					-1.356	21
			7.07814	17					-0.959913	21
			7.1132	17					-0.800414	21
			7.14396	17					-0.622606	21
			7.43904	17					-0.505133	21
			7.57453	17					-0.421247	21
			8.14949	17					0.376451	21
			8.15445	17					0.846264	21
			8.15883	17					1.11951	21
			8.16653	17					1.63344	21
			8.22125	17					1.70737	21
			8.26139	17					1.99057	21
			8.44612	17					2.25111	21
			8.59014	17					2.46112	21
			8.73858	17					3.00261	21
			8.87453	17					3.07699	21
			9.06335	17					3.30784	21
			9.35433	17					3.51158	21
			9.43494	17					3.81681	21
			-4.04818	18					3.93404	21
			-4.04052	18					4.86568	21
			-3.97163	18					5.04951	21
			-3.87656	18					5.90312	21
			-3.71247	18					5.96169	21
			-3.54388	18					6.13315	21
			-2.32622	18					6.21196	21
			-2.31913	18					6.29461	21
			-2.31061	18					6.39476	21
			-2.29845	18					6.43187	21
			-2.28092	18					6.84032	21
			-2.235	18					6.99556	21
			-2.13784	18					7.07425	21
			-1.67041	18					7.29642	21
			-1.65554	18					7.45829	21
			-1.64489	18					8.04824	21
			-1.5712	18					8.51629	21
			-1.4276	18					8.71085	21
			-0.739056	18					8.89038	21
			-0.732298	18					9.10714	21
			-0.72472	18					9.29445	21
			-0.706247	18					9.63045	21
			-0.677288	18					9.87522	21
			-0.607656	18					-4.98666	22
			-0.47429	18					-4.78899	22
			-0.0996278	18					-4.23029	22
			0.263934	18					-3.97744	22
			0.362812	18					-3.87537	22
			0.490362	18					-3.56915	22
			0.620615	18					-3.43878	22
			0.811939	18					-3.32896	22
			1.06778	18					-3.2035	22
			1.27094	18					-3.05576	22
			1.64789	18					-3.01599	22
			2.16395	18					-2.94562	22
			2.28491	18					-2.91133	22
			2.51023	18					-2.82868	22
			2.71884	18					-2.77596	22
			3.06085	18					-2.66127	22
			3.74251	18					-2.50403	22
			3.9664	18					-2.4441	22
			4.36011	18					-2.23807	22
			4.55475	18					-1.99952	22
			4.77368	18					-1.55543	22
			4.94272	18					-1.35899	22
			5.15531	18					-0.456431	22
			5.60845	18					-0.137147	22
			5.62713	18					-0.0123009	22
			5.68021	18					0.165261	22
			5.84831	18					0.404673	22
			6.00306	18					0.609801	22
			6.20626	18					0.729978	22
			6.35179	18					0.777246	22
			6.94465	18					0.831559	22
			6.96153	18					0.892795	22
			7.016	18					0.970824	22
			7.07908	18					1.10849	22
			7.25562	18					1.72519	22
			7.42253	18					1.90283	22
			7.59161	18					2.01785	22
			8.26217	18					2.156	22
			8.3912	18					2.31202	22
			8.57449	18					2.46611	22
			8.70065	18					2.7353	22
			9.02866	18					2.84229	22
			9.11488	18					2.98684	22
			-4.88184	19					3.29994	22
			-4.87861	19					3.40983	22
			-4.87554	19					3.90332	22
			-4.87197	19					4.12143	22
			-4.86726	19					4.17542	22
			-4.42268	19					4.6164	22
			-3.87381	19					4.84594	22
			-3.86972	19					5.34188	22
			-3.86595	19					5.58981	22
			-3.86083	19					6.36617	22
			-3.85514	19					6.41332	22
			-3.3646	19					6.44465	22
			-2.49866	19					6.55238	22
			-2.47146	19					6.82599	22
			-2.43521	19					6.90471	22
			-2.32601	19					7.00621	22
			-2.0377	19					7.16309	22
			-0.845511	19					7.54406	22
			-0.841251	19					7.68062	22
			-0.837401	19					8.09338	22
			-0.831257	19					8.24808	22
			-0.0177076	19					8.42831	22
			-0.00926985	19					8.56679	22
			0.0250957	19					8.68976	22
			0.0636801	19					9.86678	22
			0.226046	19					9.90312	22
			0.288879	19					-4.91088	23
			0.331764	19					-4.65251	23
			0.58584	19					-4.15394	23
			0.731043	19					-3.44148	23
			0.897177	19					-3.43284	23
			1.00363	19					-3.42076	23
			1.14781	19					-3.36681	23
			1.25406	19					-3.19474	23
			1.34037	19					-3.14427	23
			1.43101	19					-1.40511	23
			1.56532	19					-1.38139	23
			1.78929	19					-1.35538	23
			1.9689	19					-1.28542	23
			2.43892	19					-1.04916	23
			2.62909	19					-0.93546	23
			2.79445	19					-0.661232	23
			3.01817	19					-0.502061	23
			3.25881	19					0.0488935	23
			3.714	19					0.241406	23
			3.91004	19					0.326439	23
			4.26967	19					0.388944	23
			5.51293	19					0.537548	23
			5.79031	19					0.585717	23
			6.5391	19					0.659322	23
			6.54349	19					0.840488	23
			6.54734	19					0.985815	23
			6.55336	19					1.1474	23
			6.91942	19					1.26488	23
			7.71814	19					1.41561	23
			7.72215	19					1.45301	23
			7.72625	19					1.5783	23
			7.79986	19					1.76983	23
			8.19762	19					1.91389	23
			8.20311	19					2.1873	23
			8.21064	19					2.40897	23
			8.70897	19					2.64191	23
			8.71953	19					2.73498	23
			8.74194	19					2.86863	23
			9.40521	19					3.1866	23
			9.42761	19					3.3273	23
			9.46931	19					3.41901	23
			9.52911	19					3.49864	23
			-3.73013	20					3.61054	23
			-3.72464	20					3.83082	23
			-3.69085	20					4.52964	23
			-2.89839	20					4.73846	23
			-2.45311	20					5.00298	23
			-2.39106	20					5.13434	23
			-2.32769	20					5.21642	23
			-2.24213	20					5.52452	23
			-2.107	20					5.76664	23
			-1.61818	20					5.93257	23
			-1.22808	20					6.04492	23
			-1.21157	20					6.32714	23
			-1.16779	20					6.81014	23
			-0.907074	20					7.22363	23
			-0.656276	20					7.62868	23
			-0.430381	20					8.30842	23
			-0.159716	20					8.49298	23
			-0.145503	20					8.53702	23
			-0.130839	20					8.63257	23
			0.0879285	20					8.7086	23
			0.196063	20					8.78077	23
			0.245584	20					8.97668	23
			0.365065	20					9.07351	23
			0.485405	20					9.22236	23
			0.592844	20					9.50535	23
			0.704952	20					9.5994	23
			0.795514	20					9.78519	23
			0.846346	20					9.9956	23
			0.930519	20					-4.86841	24
			1.06561	20					-4.58083	24
			1.36597	20					-4.25429	24
			1.47258	20					-3.91367	24
			1.61009	20					-3.87136	24
			2.2473	20					-3.82638	24
			2.52292	20					-3.73193	24
			2.78151	20					-3.44586	24
			3.05156	20					-3.0676	24
			3.23043	20					-2.77121	24
			4.06446	20					-2.37046	24
			5.39435	20					-2.25356	24
			5.39923	20					-2.12998	24
			5.40369	20					-1.93853	24
			5.41098	20					-1.60557	24
			5.42966	20					-1.33822	24
			5.46255	20					-1.29054	24
			5.53714	20					-1.21714	24
			5.67947	20					-1.08455	24
			6.24161	20					-0.795786	24
			6.47533	20					0.326685	24
			7.4512	20					0.390951	24
			7.63335	20					0.427693	24
			8.49745	20					0.502117	24
			8.52477	20					0.711628	24
			8.62725	20					0.903772	24
			8.71978	20					1.045	24
			9.78945	20					1.19217	24
			9.84479	20					1.37125	24
			-4.95786	21					1.53538	24
			-4.63457	21					1.66067	24
			-4.1693	21					2.01162	24
			-4.00259	21					2.1626	24
			-3.78874	21					2.36134	24
			-3.50538	21					2.43781	24
			-1.93583	21					3.00449	24
			-1.52676	21					3.17759	24
			-1.356	21					3.2548	24
			-0.959913	21					3.61099	24
			-0.800414	21					4.173	24
			-0.622606	21					4.31694	24
			-0.505133	21					4.45485	24
			-0.421247	21					4.88104	24
			0.376451	21					5.63196	24
			0.846264	21					5.80977	24
			1.11951	21					7.13929	24
			1.63344	21					7.16006	24
			1.70737	21					7.23395	24
			1.99057	21					7.27909	24
			2.25111	21					7.35097	24
			2.46112	21					7.53513	24
			3.00261	21					7.68717	24
			3.07699	21					7.96857	24
			3.30784	21					8.1046	24
			3.51158	21					8.22936	24
			3.81681	21					8.56364	24
			3.93404	21					8.63708	24
			4.86568	21					8.69959	24
			5.04951	21					8.94834	24
			5.90312	21					9.05741	24
			5.96169	21					9.27245	24
			6.13315	21					9.38042	24
			6.21196	21					9.60857	24
			6.29461	21					-4.55617	25
			6.39476	21					-3.5941	25
			6.43187	21					-3.58734	25
			6.84032	21					-3.58128	25
			6.99556	21					-3.55703	25
			7.07425	21					-3.52561	25
			7.29642	21					-3.26097	25
			7.45829	21					-2.54388	25
			8.04824	21					-2.06129	25
			8.51629	21					-2.04568	25
			8.71085	21					-1.7599	25
			8.89038	21					-1.65161	25
			9.10714	21					-1.06002	25
			9.29445	21					-0.839244	25
			9.63045	21					-0.1394	25
			9.87522	21					-0.116954	25
			-4.98666	22					-0.0957366	25
			-4.78899	22					0.0805147	25
			-4.23029	22					0.208392	25
			-3.97744	22					0.352367	25
			-3.87537	22					0.459232	25
			-3.56915	22					0.64261	25
			-3.43878	22					0.708761	25
			-3.32896	22					0.774707	25
			-3.2035	22					0.882677	25
			-3.05576	22					1.00134	25
			-3.01599	22					1.13171	25
			-2.94562	22					1.87604	25
			-2.91133	22					2.05328	25
			-2.82868	22					2.53972	25
			-2.77596	22					2.82742	25
			-2.66127	22					3.01264	25
			-2.50403	22					3.75726	25
			-2.4441	22					3.94895	25
			-2.23807	22					4.1157	25
			-1.99952	22					4.61091	25
			-1.55543	22					4.76402	25
			-1.35899	22					5.47287	25
			-0.456431	22					5.78912	25
			-0.137147	22					5.88653	25
			-0.0123009	22					6.12926	25
			0.165261	22					6.79973	25
			0.404673	22					7.54353	25
			0.609801	22					7.84549	25
			0.729978	22					8.06597	25
			0.777246	22					8.1977	25
			0.831559	22					8.24792	25
			0.892795	22					8.40447	25
			0.970824	22					8.84139	25
			1.10849	22					8.99286	25
			1.72519	22					9.1848	25
			1.90283	22					9.31472	25
			2.01785	22					9.54529	25
			2.156	22					9.92011	25
			2.31202	22					-4.90552	26
			2.46611	22					-4.79898	26
			2.7353	22					-4.53774	26
			2.84229	22					-4.27215	26
			2.98684	22					-3.86169	26
			3.29994	22					-3.68622	26
			3.40983	22					-3.52287	26
			3.90332	22					-3.36337	26
			4.12143	22					-2.84588	26
			4.17542	22					-2.78505	26
			4.6164	22					-2.61544	26
			4.84594	22					-2.55154	26
			5.34188	22					-2.47925	26
			5.58981	22					-2.39929	26
			6.36617	22					-1.61274	26
			6.41332	22					-0.844201	26
			6.44465	22					-0.797383	26
			6.55238	22					-0.656808	26
			6.82599	22					-0.399906	26
			6.90471	22					0.030912	26
			7.00621	22					0.0376295	26
			7.16309	22					0.103739	26
			7.54406	22					0.308499	26
			7.68062	22					0.409916	26
			8.09338	22					0.566424	26
			8.24808	22					0.822958	26
			8.42831	22					2.44379	26
			8.56679	22					2.57838	26
			8.68976	22					3.09051	26
			9.86678	22					3.20208	26
			9.90312	22					3.45641	26
			-4.91088	23					3.65617	26
			-4.65251	23					3.9125	26
			-4.15394	23					4.21105	26
			-3.44148	23					5.41553	26
			-3.43284	23					6.5987	26
			-3.42076	23					6.83447	26
			-3.36681	23					6.9793	26
			-3.19474	23					7.2965	26
			-3.14427	23					8.72936	26
			-1.40511	23					9.23387	26
			-1.38139	23					9.61291	26
			-1.35538	23					9.65121	26
			-1.28542	23					9.83639	26
			-1.04916	23					9.92249	26
			-0.93546	23					-4.97044	27
			-0.661232	23					-4.35002	27
			-0.502061	23					-3.64763	27
			0.0488935	23					-3.42678	27
			0.241406	23					-3.41543	27
			0.326439	23					-3.37209	27
			0.388944	23					-2.67643	27
			0.537548	23					-1.91568	27
			0.585717	23					-1.8981	27
			0.659322	23					-1.83974	27
			0.840488	23					-0.850345	27
			0.985815	23					-0.822246	27
			1.1474	23					-0.757201	27
			1.26488	23					-0.557644	27
			1.41561	23					-0.34248	27
			1.45301	23					-0.267974	27
			1.5783	23					-0.114824	27
			1.76983	23					-0.0513768	27
			1.91389	23					0.152236	27
			2.1873	23					0.314847	27
			2.40897	23					0.373338	27
			2.64191	23					0.468898	27
			2.73498	23					0.538694	27
			2.86863	23					0.609596	27
			3.1866	23					0.780851	27
			3.3273	23					0.95616	27
			3.41901	23					1.02583	27
			3.49864	23					1.16547	27
			3.61054	23					1.27114	27
			3.83082	23					1.38214	27
			4.52964	23					1.46558	27
			4.73846	23					1.69594	27
			5.00298	23					1.81087	27
			5.13434	23					2.12246	27
			5.21642	23					2.35491	27
			5.52452	23					2.67415	27
			5.76664	23					2.7292	27
			5.93257	23					2.99192	27
			6.04492	23					3.51236	27
			6.32714	23					3.6823	27
			6.81014	23					5.01961	27
			7.22363	23					5.24472	27
			7.62868	23					5.56421	27
			8.30842	23					5.6404	27
			8.49298	23					5.80534	27
			8.53702	23					5.87367	27
			8.63257	23					6.00638	27
			8.7086	23					6.23014	27
			8.78077	23					6.57466	27
			8.97668	23					6.82419	27
			9.07351	23					7.02542	27
			9.22236	23					7.16698	27
			9.50535	23					7.64593	27
			9.5994	23					8.07462	27
			9.78519	23					8.28396	27
			9.9956	23					8.625	27
			-4.86841	24					8.72215	27
			-4.58083	24					9.1841	27
			-4.25429	24					9.19234	27
			-3.91367	24					9.20094	27
			-3.87136	24					9.2154	27
			-3.82638	24					9.23231	27
			-3.73193	24					9.26406	27
			-3.44586	24					9.28888	27
			-3.0676	24					9.68468	27
			-2.77121	24					-4.16832	28
			-2.37046	24					-4.05261	28
			-2.25356	24					-2.97048	28
			-2.12998	24					-2.65972	28
			-1.93853	24					-2.43095	28
			-1.60557	24					-1.72644	28
			-1.33822	24					-1.032	28
			-1.29054	24					-0.533313	28
			-1.21714	24					-0.486824	28
			-1.08455	24					-0.370907	28
			-0.795786	24					-0.299554	28
			0.326685	24					-0.0429391	28
			0.390951	24					0.1055	28
			0.427693	24					0.229896	28
			0.502117	24					0.383169	28
			0.711628	24					0.45362	28
			0.903772	24					0.710891	28
			1.045	24					0.922163	28
			1.19217	24					1.2231	28
			1.37125	24					1.54828	28
			1.53538	24					1.76967	28
			1.66067	24					2.19406	28
			2.01162	24					2.48426	28
			2.1626	24					2.67935	28
			2.36134	24					2.79347	28
			2.43781	24					2.91897	28
			3.00449	24					3.38776	28
			3.17759	24					3.44694	28
			3.2548	24					3.63159	28
			3.61099	24					3.72465	28
			4.173	24					3.83402	28
			4.31694	24					4.99585	28
			4.45485	24					5.53169	28
			4.88104	24					5.67149	28
			5.63196	24					5.7666	28
			5.80977	24					5.93404	28
			7.10312	24					6.25599	28
			7.10775	24					6.62434	28
			7.11238	24					7.57752	28
			7.12016	24					7.72666	28
			7.13929	24					7.85736	28
			7.16006	24					8.57048	28
			7.23395	24					8.77	28
			7.27909	24					8.9893	28
			7.35097	24					9.11468	28
			7.53513	24					9.27532	28
			7.68717	24					9.81943	28
			7.96857	24					-4.75311	29
			8.1046	24					-4.65111	29
			8.22936	24					-4.20891	29
			8.56364	24					-3.91178	29
			8.63708	24					-3.44738	29
			8.69959	24					-3.37615	29
			8.94834	24					-3.27457	29
			9.05741	24					-3.16308	29
			9.27245	24					-2.91551	29
			9.38042	24					-2.55924	29
			9.60857	24					-2.41146	29
			-4.55617	25					-2.30811	29
			-3.5941	25					-2.12957	29
			-3.58734	25					-2.00669	29
			-3.58128	25					-1.92501	29
			-3.55703	25					-1.82323	29
			-3.52561	25					-1.20997	29
			-3.26097	25					-1.02586	29
			-2.54388	25					-0.829578	29
			-2.06129	25					-0.509024	29
			-2.04568	25					-0.0349928	29
			-1.7599	25					0.108368	29
			-1.65161	25					0.204788	29
			-1.06002	25					0.282858	29
			-0.839244	25					0.572487	29
			-0.164263	25					0.732108	29
			-0.160003	25					0.915978	29
			-0.15603	25					1.0919	29
			-0.151279	25					1.40295	29
			-0.1394	25					1.71261	29
			-0.116954	25					1.82259	29
			-0.0957366	25					1.92425	29
			0.0805147	25					2.27041	29
			0.208392	25					2.47545	29
			0.352367	25					2.88149	29
			0.459232	25					3.13311	29
			0.64261	25					3.30715	29
			0.708761	25					3.54799	29
			0.774707	25					4.15371	29
			0.882677	25					4.46263	29
			1.00134	25					4.68988	29
			1.13171	25					6.11709	29
			1.87604	25					6.1499	29
			2.05328	25					6.37391	29
			2.53972	25					6.85212	29
			2.82742	25					7.01543	29
			3.01264	25					7.08674	29
			3.75726	25					7.16338	29
			3.94895	25					7.36285	29
			4.1157	25					7.55573	29
			4.61091	25					8.07777	29
			4.76402	25					8.33361	29
			5.47287	25					8.46456	29
			5.78912	25					8.96919	29
			5.88653	25					9.14224	29
			6.12926	25					9.88223	29
			6.79973	25					-4.74057	30
			7.54353	25					-4.59365	30
			7.84549	25					-4.27424	30
			8.06597	25					-3.96139	30
			8.1977	25					-3.72447	30
			8.24792	25					-3.4883	30
			8.40447	25					-3.3107	30
			8.84139	25					-3.11503	30
			8.99286	25					-2.27707	30
			9.1848	25					-2.03249	30
			9.31472	25					-1.7153	30
			9.54529	25					-1.42641	30
			9.92011	25					-1.17786	30
			-4.90552	26					-0.711408	30
			-4.79898	26					-0.53315	30
			-4.53774	26					-0.346167	30
			-4.27215	26					-0.168564	30
			-3.86169	26					0.0524161	30
			-3.68622	26					0.143798	30
			-3.52287	26					0.225677	30
			-3.36337	26					0.3094	30
			-2.84588	26					0.435475	30
			-2.78505	26					0.572814	30
			-2.61544	26					0.612873	30
			-2.55154	26					0.676116	30
			-2.47925	26					0.887593	30
			-2.39929	26					1.07609	30
			-1.61274	26					1.33967	30
			-0.844201	26					1.46099	30
			-0.797383	26					1.5706	30
			-0.656808	26					1.72408	30
			-0.399906	26					1.86367	30
			0.030912	26					2.01543	30
			0.0376295	26					2.06106	30
			0.103739	26					2.13925	30
			0.308499	26					2.47197	30
			0.409916	26					2.80788	30
			0.566424	26					2.91463	30
			0.822958	26					3.07458	30
			2.44379	26					3.38612	30
			2.57838	26					3.99749	30
			3.09051	26					4.3744	30
			3.20208	26					5.91196	30
			3.45641	26					6.52239	30
			3.65617	26					7.10509	30
			3.9125	26					7.30952	30
			4.21105	26					7.37719	30
			5.41553	26					7.65056	30
			6.5987	26					7.72519	30
			6.83447	26					7.96288	30
			6.9793	26					8.01002	30
			7.2965	26					8.23907	30
			8.72936	26					8.3343	30
			9.23387	26					9.54078	30
			9.61291	26					9.70868	30
			9.65121	26					-4.81893	31
			9.83639	26					-4.75409	31
			9.92249	26					-4.66467	31
			-4.97044	27					-4.57718	31
			-4.35002	27					-4.51631	31
			-3.677	27					-4.45704	31
			-3.67241	27					-4.40503	31
			-3.66762	27					-4.03761	31
			-3.6589	27					-3.95627	31
			-3.64763	27					-3.86243	31
			-3.42678	27					-3.71321	31
			-3.41543	27					-3.60708	31
			-3.37209	27					-3.59328	31
			-2.67643	27					-3.56293	31
			-1.93583	27					-3.55097	31
			-1.93026	27					-3.49207	31
			-1.92571	27					-3.38581	31
			-1.91568	27					-3.35895	31
			-1.8981	27					-3.18884	31
			-1.83974	27					-3.02344	31
			-0.850345	27					-2.93517	31
			-0.822246	27					-2.84965	31
			-0.757201	27					-2.73172	31
			-0.557644	27					-2.60938	31
			-0.34248	27					-2.35464	31
			-0.267974	27					-2.1541	31
			-0.114824	27					-2.08234	31
			-0.0513768	27					-1.94889	31
			0.152236	27					-1.91567	31
			0.314847	27					-1.75204	31
			0.373338	27					-1.65865	31
			0.468898	27					-1.63776	31
			0.538694	27					-1.60458	31
			0.609596	27					-1.5259	31
			0.780851	27					-1.45766	31
			0.95616	27					-1.19281	31
			1.02583	27					-1.15263	31
			1.16547	27					-0.988461	31
			1.27114	27					-0.93382	31
			1.38214	27					-0.867506	31
			1.46558	27					-0.803567	31
			1.69594	27					-0.714725	31
			1.81087	27					-0.508408	31
			2.12246	27					-0.311227	31
			2.35491	27					-0.0845942	31
			2.67415	27					0.0315686	31
			2.7292	27					0.126432	31
			2.99192	27					0.162108	31
			3.51236	27					0.240547	31
			3.6823	27					0.299816	31
			5.01961	27					0.368998	31
			5.24472	27					0.427284	31
			5.56421	27					0.524851	31
			5.6404	27					0.608451	31
			5.80534	27					0.747469	31
			5.87367	27					0.881204	31
			6.00638	27					0.915733	31
			6.23014	27					0.996302	31
			6.57466	27					1.04906	31
			6.82419	27					1.1488	31
			7.02542	27					1.35581	31
			7.16698	27					1.422	31
			7.64593	27					1.5874	31
			8.07462	27					1.7392	31
			8.28396	27					1.8282	31
			8.625	27					1.92032	31
			8.72215	27					2.11455	31
			9.1841	27					2.26086	31
			9.19234	27					2.34659	31
			9.20094	27					2.48389	31
			9.2154	27					2.56434	31
			9.23231	27					2.64585	31
			9.26406	27					2.75345	31
			9.28888	27					3.27893	31
			9.68468	27					3.34639	31
			-4.16832	28					3.46898	31
			-4.05261	28					3.59854	31
			-2.97048	28					3.75025	31
			-2.65972	28					3.84024	31
			-2.43095	28					3.93257	31
			-1.72644	28					4.05627	31
			-1.032	28					4.1823	31
			-0.533313	28					4.23334	31
			-0.486824	28					4.35188	31
			-0.370907	28					4.44006	31
			-0.299554	28					4.59514	31
			-0.0429391	28					4.88493	31
			0.1055	28					5.27037	31
			0.229896	28					5.36392	31
			0.383169	28					5.76983	31
			0.45362	28					6.28921	31
			0.710891	28					6.50953	31
			0.922163	28					6.85737	31
			1.2231	28					7.01731	31
			1.54828	28					7.16829	31
			1.76967	28					7.52571	31
			2.19406	28					7.79326	31
			2.48426	28					8.08916	31
			2.67935	28					8.49855	31
			2.79347	28					9.06729	31
			2.91897	28					9.40631	31
			3.38776	28					9.59256	31
			3.44694	28					9.77946	31
			3.63159	28					9.82832	31
			3.72465	28					-4.16344	32
			3.83402	28					-4.08775	32
			4.99585	28					-3.60204	32
			5.53169	28					-3.56391	32
			5.67149	28					-3.54482	32
			5.7666	28					-3.52586	32
			5.93404	28					-3.48428	32
			6.25599	28					-3.4468	32
			6.62434	28					-3.36546	32
			7.57752	28					-3.31663	32
			7.72666	28					-3.24794	32
			7.85736	28					-2.28022	32
			8.57048	28					-2.14218	32
			8.77	28					-1.99653	32
			8.9893	28					-1.29005	32
			9.11468	28					-1.28145	32
			9.27532	28					-1.27354	32
			9.81943	28					-1.25331	32
			-4.75311	29					-1.23688	32
			-4.65111	29					-1.16283	32
			-4.20891	29					-0.735164	32
			-3.91178	29					-0.728692	32
			-3.44738	29					-0.714602	32
			-3.37615	29					-0.686831	32
			-3.27457	29					-0.666924	32
			-3.16308	29					-0.648615	32
			-2.91551	29					-0.590083	32
			-2.55924	29					-0.251507	32
			-2.41146	29					-0.237826	32
			-2.30811	29					-0.179745	32
			-2.12957	29					0.130569	32
			-2.00669	29					0.308909	32
			-1.92501	29					0.395704	32
			-1.82323	29					0.454564	32
			-1.20997	29					0.675011	32
			-1.02586	29					0.833076	32
			-0.829578	29					1.01961	32
			-0.509024	29					1.35151	32
			-0.0349928	29					1.54177	32
			0.108368	29					1.66272	32
			0.204788	29					1.80023	32
			0.282858	29					2.07019	32
			0.572487	29					2.27262	32
			0.732108	29					2.42401	32
			0.915978	29					2.62615	32
			1.0919	29					2.85474	32
			1.40295	29					2.95428	32
			1.71261	29					4.06143	32
			1.82259	29					4.12021	32
			1.92425	29					5.1275	32
			2.27041	29					5.23944	32
			2.47545	29					5.86191	32
			2.88149	29					5.87756	32
			3.13311	29					5.89869	32
			3.30715	29					5.94912	32
			3.54799	29					6.00789	32
			4.15371	29					6.08973	32
			4.46263	29					6.1918	32
			4.68988	29					6.97984	32
			6.11709	29					7.00146	32
			6.1499	29					7.03046	32
			6.37391	29					7.12959	32
			6.85212	29					8.09514	32
			7.01543	29					9.24874	32
			7.08674	29					9.25902	32
			7.16338	29					9.28749	32
			7.36285	29					9.42773	32
			7.55573	29					-4.95663	33
			8.07777	29					-4.94398	33
			8.33361	29					-4.93046	33
			8.46456	29					-4.87287	33
			8.96919	29					-4.42551	33
			9.14224	29					-3.46274	33
			9.88223	29					-3.45381	33
			-4.74057	30					-3.43259	33
			-4.59365	30					-3.40105	33
			-4.27424	30					-3.33105	33
			-3.96139	30					-3.10188	33
			-3.72447	30					-2.7205	33
			-3.4883	30					-2.71251	33
			-3.3107	30					-2.70084	33
			-3.11503	30					-2.33015	33
			-2.27707	30					-1.79066	33
			-2.03249	30					-1.63399	33
			-1.7153	30					-1.58271	33
			-1.42641	30					-1.3768	33
			-1.17786	30					-1.23504	33
			-0.711408	30					-1.05346	33
			-0.53315	30					-0.910391	33
			-0.346167	30					-0.773175	33
			-0.168564	30					-0.667825	33
			0.0524161	30					0.1737	33
			0.143798	30					0.402421	33
			0.225677	30					0.502897	33
			0.3094	30					0.634624	33
			0.435475	30					0.821812	33
			0.572814	30					1.03861	33
			0.612873	30					1.16743	33
			0.676116	30					1.24055	33
			0.887593	30					1.44539	33
			1.07609	30					1.74284	33
			1.33967	30					2.05066	33
			1.46099	30					2.16817	33
			1.5706	30					2.43564	33
			1.72408	30					2.61206	33
			1.86367	30					2.93642	33
			2.01543	30					3.16162	33
			2.06106	30					3.41201	33
			2.13925	30					3.59235	33
			2.47197	30					3.77794	33
			2.80788	30					3.90263	33
			2.91463	30					3.96452	33
			3.07458	30					4.06016	33
			3.38612	30					4.13614	33
			3.99749	30					4.54447	33
			4.3744	30					4.64699	33
			5.91196	30					4.81952	33
			6.52239	30					4.87739	33
			7.10509	30					5.05754	33
			7.30952	30					5.1107	33
			7.37719	30					5.23784	33
			7.65056	30					5.36965	33
			7.72519	30					6.17436	33
			7.96288	30					6.18234	33
			8.01002	30					6.19279	33
			8.23907	30					6.23956	33
			8.3343	30					6.3024	33
			9.54078	30					7.05881	33
			9.70868	30					7.07683	33
			-4.81893	31					7.11709	33
			-4.75409	31					7.24595	33
			-4.66467	31					7.37932	33
			-4.57718	31					7.80383	33
			-4.51631	31					8.19959	33
			-4.45704	31					8.36498	33
			-4.40503	31					8.64794	33
			-4.03761	31					8.98586	33
			-3.95627	31					9.10329	33
			-3.86243	31					9.79973	33
			-3.71321	31					9.80989	33
			-3.60708	31					9.83316	33
			-3.59328	31					9.8579	33
			-3.56293	31					9.88092	33
			-3.55097	31					9.91508	33
			-3.49207	31					-4.89935	34
			-3.38581	31					-3.59522	34
			-3.35895	31					-3.58826	34
			-3.18884	31					-3.56143	34
			-3.02344	31					-3.54513	34
			-2.93517	31					-3.51306	34
			-2.84965	31					-3.0935	34
			-2.73172	31					-2.92823	34
			-2.60938	31					-2.61673	34
			-2.35464	31					-2.51559	34
			-2.1541	31					-1.82337	34
			-2.08234	31					-1.79122	34
			-1.94889	31					-1.5251	34
			-1.91567	31					-1.49237	34
			-1.75204	31					-0.633764	34
			-1.65865	31					-0.184965	34
			-1.63776	31					-0.129873	34
			-1.60458	31					0.113102	34
			-1.5259	31					0.332566	34
			-1.45766	31					0.410391	34
			-1.19281	31					0.55158	34
			-1.15263	31					0.615314	34
			-0.988461	31					0.669136	34
			-0.93382	31					0.730166	34
			-0.867506	31					0.810161	34
			-0.803567	31					0.9031	34
			-0.714725	31					0.999192	34
			-0.508408	31					1.06678	34
			-0.311227	31					1.27854	34
			-0.0845942	31					1.4507	34
			0.0315686	31					1.67819	34
			0.126432	31					1.89868	34
			0.162108	31					2.09438	34
			0.240547	31					2.78133	34
			0.299816	31					3.28309	34
			0.368998	31					3.66492	34
			0.427284	31					4.13805	34
			0.524851	31					4.36771	34
			0.608451	31					5.22718	34
			0.747469	31					5.36538	34
			0.881204	31					5.56526	34
			0.915733	31					6.09291	34
			0.996302	31					6.88139	34
			1.04906	31					7.22627	34
			1.1488	31					7.59651	34
			1.35581	31					7.62957	34
			1.422	31					8.00304	34
			1.5874	31					-4.33611	35
			1.7392	31					-3.61959	35
			1.8282	31					-2.70843	35
			1.92032	31					-2.68193	35
			2.11455	31					-2.39267	35
			2.26086	31					-2.34057	35
			2.34659	31					-1.90893	35
			2.48389	31					-1.66846	35
			2.56434	31					-1.64011	35
			2.64585	31					-1.58441	35
			2.75345	31					-1.52076	35
			3.27893	31					-0.738213	35
			3.34639	31					-0.582319	35
			3.46898	31					-0.538205	35
			3.59854	31					0.250441	35
			3.75025	31					0.38991	35
			3.84024	31					0.49485	35
			3.93257	31					0.619615	35
			4.05627	31					0.698176	35
			4.1823	31					0.775591	35
			4.23334	31					0.912807	35
			4.35188	31					1.02905	35
			4.44006	31					1.14886	35
			4.59514	31					1.25085	35
			4.88493	31					1.57571	35
			5.27037	31					1.67229	35
			5.36392	31					2.24233	35
			5.76983	31					2.53855	35
			6.28921	31					2.62224	35
			6.50953	31					2.7957	35
			6.85737	31					2.93333	35
			7.01731	31					3.22865	35
			7.16829	31					3.6847	35
			7.52571	31					3.90806	35
			7.79326	31					4.25912	35
			8.08916	31					4.68192	35
			8.49855	31					4.80267	35
			9.06729	31					5.19543	35
			9.40631	31					5.46417	35
			9.59256	31					5.83666	35
			9.77946	31					6.09283	35
			9.82832	31					7.2284	35
			-4.20498	32					7.35092	35
			-4.20104	32					8.02954	35
			-4.19756	32					8.28198	35
			-4.19318	32					8.35296	35
			-4.18478	32					8.6632	35
			-4.16344	32					8.68577	35
			-4.08775	32					8.77694	35
			-3.60204	32					8.84088	35
			-3.56391	32					9.10958	35
			-3.54482	32					9.6181	35
			-3.52586	32					9.96196	35
			-3.48428	32					-4.48471	36
			-3.4468	32					-4.417	36
			-3.36546	32					-4.11632	36
			-3.31663	32					-3.41418	36
			-3.24794	32					-3.37449	36
			-2.28022	32					-3.34135	36
			-2.14218	32					-3.24202	36
			-1.99653	32					-3.13598	36
			-1.29005	32					-2.07564	36
			-1.28145	32					-1.48143	36
			-1.27354	32					-1.23682	36
			-1.25331	32					-0.884481	36
			-1.23688	32					-0.463452	36
			-1.16283	32					-0.233502	36
			-0.735164	32					-0.0724881	36
			-0.728692	32					0.0917209	36
			-0.714602	32					0.117731	36
			-0.686831	32					0.291279	36
			-0.666924	32					0.392778	36
			-0.648615	32					0.488788	36
			-0.590083	32					0.59553	36
			-0.251507	32					0.730658	36
			-0.237826	32					0.865048	36
			-0.179745	32					1.25929	36
			0.113079	32					1.32868	36
			0.118814	32					1.52061	36
			0.130569	32					2.09283	36
			0.308909	32					2.20244	36
			0.395704	32					2.72533	36
			0.454564	32					2.94897	36
			0.675011	32					3.11376	36
			0.833076	32					3.5268	36
			1.01961	32					3.70579	36
			1.35151	32					3.95856	36
			1.54177	32					4.46171	36
			1.66272	32					4.92555	36
			1.80023	32					5.3612	36
			2.07019	32					5.51046	36
			2.27262	32					5.72038	36
			2.42401	32					6.4559	36
			2.62615	32					6.61236	36
			2.85474	32					7.17696	36
			2.95428	32					7.29648	36
			4.03112	32					7.50382	36
			4.03571	32					7.64272	36
			4.03992	32					7.83896	36
			4.04554	32					8.17548	36
			4.05184	32					8.52766	36
			4.06143	32					8.64063	36
			4.12021	32					8.70936	36
			5.1275	32					8.79669	36
			5.23944	32					8.88708	36
			5.83451	32					8.99612	36
			5.83942	32					9.09999	36
			5.84377	32					9.76896	36
			5.8511	32					9.89691	36
			5.86191	32					-4.88866	37
			5.87756	32					-4.81407	37
			5.89869	32					-4.76652	37
			5.94912	32					-4.53567	37
			6.00789	32					-4.40254	37
			6.08973	32					-4.28904	37
			6.1918	32					-3.76889	37
			6.97984	32					-3.70147	37
			7.00146	32					-3.59035	37
			7.03046	32					-3.47484	37
			7.12959	32					-3.30469	37
			8.09514	32					-3.1465	37
			9.24874	32					-2.95088	37
			9.25902	32					-2.88821	37
			9.28749	32					-2.75828	37
			9.42773	32					-2.64949	37
			-4.95663	33					-2.56782	37
			-4.94398	33					-2.42536	37
			-4.93046	33					-2.3853	37
			-4.87287	33					-2.21155	37
			-4.42551	33					-2.1497	37
			-3.46274	33					-2.04939	37
			-3.45381	33					-1.88632	37
			-3.43259	33					-1.70401	37
			-3.40105	33					-1.53018	37
			-3.33105	33					-1.37649	37
			-3.10188	33					-1.26062	37
			-2.7205	33					-1.18021	37
			-2.71251	33					-1.12086	37
			-2.70084	33					-1.02583	37
			-2.33015	33					-0.871988	37
			-1.79066	33					-0.817061	37
			-1.63399	33					0.0715686	37
			-1.58271	33					0.174256	37
			-1.3768	33					0.216035	37
			-1.23504	33					0.300699	37
			-1.05346	33					0.405475	37
			-0.910391	33					0.451719	37
			-0.773175	33					0.488379	37
			-0.667825	33					0.527987	37
			0.1737	33					0.571405	37
			0.402421	33					0.620762	37
			0.502897	33					0.664958	37
			0.634624	33					0.705959	37
			0.821812	33					0.802543	37
			1.03861	33					0.848213	37
			1.16743	33					0.870332	37
[truncated: 2,052 more rows]

## Sheet: Fig 3E 3F
Figure 3E - Sciatic Nerve Stim Response - Firing Rate Time Course - Bursts																	Figure 3F - Sciatic Nerve Stim Response - Firing Rate Time Course - Single Spikes
	Firing Rate (bursts/s)																	Firing Rate (spikes/s)
Time	Unit2	Unit3	Unit6	Unit8	Unit12	Unit13	Unit16	Unit18	Unit20	Unit24	Unit25	Unit27	Unit30	Mean	SD		Time	Unit2	Unit3	Unit6	Unit8	Unit12	Unit13	Unit16	Unit18	Unit20	Unit24	Unit25	Unit27	Unit30	Mean	SD
-4.75	0.2	0.133333	0.6	0.6	0	0	0	0	0.133333	0	0	0.0666667	0.0666667	0.138462	0.2151		-4.75	2.6	2.8	2	3.26667	3.66667	1.33333	3.4	1.86667	1.26667	6.6	0.933333	3.46667	5.53333	2.97949	1.65337
-4.5	0.0666667	0.2	0.266667	0.4	0	0	0.2	0	0	0	0	0.533333	0	0.128205	0.179426		-4.5	3.06667	3.66667	2.33333	5.13333	4.26667	3.86667	3.93333	2.13333	1.73333	5.73333	1.53333	4.46667	4.4	3.55897	1.31333
-4.25	0.0666667	0.133333	0.533333	0.333333	0	0	0.0666667	0	0	0	0	0.266667	0	0.107692	0.168959		-4.25	2.73333	3.6	1.93333	3	6.06667	2.4	4.53333	1.6	1.06667	6.8	1.46667	5.6	5.26667	3.54359	1.91985
-4	0.0666667	0.333333	0.6	0.466667	0.0666667	0	0	0.0666667	0.2	0	0	0.133333	0	0.148718	0.198427		-4	2.6	3.86667	2.2	2.66667	4.33333	4	5.33333	1.73333	1.26667	7.46667	1.93333	5.73333	5.86667	3.76923	1.90567
-3.75	0	0.4	0.8	0.6	0	0	0	0	0.0666667	0	0	0.133333	0	0.153846	0.269958		-3.75	2.8	4.26667	1.8	4.2	3.86667	2.93333	5.4	2.2	2.2	6.13333	2.2	4.93333	5.46667	3.72308	1.46638
-3.5	0.0666667	0.333333	0.2	0.333333	0	0	0.133333	0	0.266667	0	0	0.266667	0	0.123077	0.138367		-3.5	2.26667	4.13333	2.26667	4.6	4.2	3.6	4.73333	1.33333	2	7.53333	1.8	4.46667	5.26667	3.70769	1.73857
-3.25	0.0666667	0.133333	0.4	0.2	0.0666667	0.133333	0.0666667	0	0.0666667	0	0	0.2	0	0.102564	0.11423		-3.25	1.73333	4.93333	2	4.13333	4.13333	3.86667	4.2	1.86667	1.86667	7.4	1.26667	5.4	6.13333	3.7641	1.91536
-3	0.133333	0.2	0.533333	0.666667	0.0666667	0.133333	0.0666667	0	0.0666667	0	0	0.133333	0	0.153846	0.209735		-3	2.06667	3.46667	1.86667	2.33333	5.46667	2.93333	5.2	2.66667	1.66667	6.53333	1.13333	5.13333	5.8	3.55897	1.82423
-2.75	0.133333	0.0666667	0.4	0.2	0	0	0.133333	0.0666667	0.333333	0	0	0	0	0.102564	0.135032		-2.75	2.8	3.46667	2.26667	2.2	5	2.13333	3.06667	1.8	2.33333	6.66667	2.06667	4.53333	4.2	3.27179	1.44977
-2.5	0.2	0.133333	0.533333	0.6	0	0	0.0666667	0	0.0666667	0	0.0666667	0.2	0	0.14359	0.201561		-2.5	2.66667	3.2	1.73333	3.06667	4.53333	3.2	3.8	1.8	1.8	6.53333	2	3.73333	4.8	3.29744	1.40781
-2.25	0.2	0.0666667	0.4	0.266667	0	0	0.0666667	0	0.0666667	0	0	0.333333	0	0.107692	0.142825		-2.25	2.8	4.33333	1.4	4.13333	4.66667	3.33333	3.46667	1.73333	2	6.73333	1.26667	4.6	5	3.49744	1.62426
-2	0.0666667	0.0666667	0.333333	0.6	0.0666667	0	0.133333	0	0.0666667	0	0	0.2	0	0.117949	0.174598		-2	2.53333	3.33333	2.26667	4.4	4.53333	2.8	5.26667	1.53333	1.46667	7.26667	1.26667	5.86667	5.06667	3.66154	1.89002
-1.75	0	0.133333	0.6	0.4	0.0666667	0	0.133333	0	0	0	0	0	0	0.102564	0.187805		-1.75	2.46667	3.26667	2	2.4	4.4	4.53333	4	1.66667	1.4	6.8	1.33333	5.66667	5.2	3.47179	1.77106
-1.5	0.133333	0.0666667	0.333333	0.466667	0.133333	0.133333	0.266667	0.0666667	0.0666667	0	0	0.133333	0	0.138462	0.140004		-1.5	2.4	3.73333	2	3.73333	5.13333	3.2	5.2	1.33333	1.33333	6.26667	1.13333	4.6	5.06667	3.47179	1.72035
-1.25	0.2	0.133333	0.666667	0.6	0	0	0.133333	0.0666667	0.133333	0	0.0666667	0.266667	0	0.174359	0.220334		-1.25	2.13333	4.06667	2.86667	4.73333	4.8	3.73333	4.53333	1.26667	1.4	4.93333	1.66667	5.2	5.8	3.62564	1.57352
-1	0	0.133333	0.533333	0.133333	0	0.133333	0.0666667	0	0.333333	0	0.0666667	0.0666667	0	0.112821	0.157256		-1	2.26667	3.53333	2.6	5.66667	5.26667	2.53333	3.73333	1.33333	1.73333	6.73333	1.46667	4.8	6.2	3.68205	1.87284
-0.75	0.133333	0.2	0.533333	0.533333	0.0666667	0	0.133333	0	0.0666667	0	0	0.266667	0	0.148718	0.190815		-0.75	1.73333	3.6	2	3.86667	5	2.93333	4.06667	1.73333	1.2	6.86667	1.86667	5.26667	4.53333	3.4359	1.70677
-0.5	0	0	0.4	0.4	0	0.133333	0.133333	0	0.133333	0	0	0.0666667	0	0.0974359	0.14559		-0.5	2.06667	4.86667	2.13333	3.4	3.86667	3.86667	5.26667	1	1.66667	5.6	1.8	4.2	6.26667	3.53846	1.68884
-0.25	0	0.2	0.4	0.266667	0.133333	0	0	0.0666667	0.2	0	0	0.266667	0.133333	0.128205	0.131829		-0.25	2.4	4.2	2.66667	4.86667	3.66667	4	4.13333	1.93333	2.26667	5.66667	1.66667	5.33333	6.06667	3.75897	1.47335
0	0	0.266667	0.466667	0.533333	0.133333	0	0.0666667	0	0	0	0	0.333333	0	0.138462	0.195243		0	2.2	4.86667	2.4	4.53333	4.8	1.33333	5.26667	1.26667	1.93333	7.2	1.46667	5.06667	5.46667	3.67692	1.96899
0.25	0.0666667	0.266667	0.6	0.333333	0.0666667	0	0	0	0.933333	0	0	0.266667	0	0.194872	0.288626		0.25	3.26667	6.06667	4.06667	3.4	7.2	3.73333	4.4	3.73333	6.4	8.6	2.26667	8.8	6.73333	5.28205	2.13666
0.5	0	0	0.133333	0	0.0666667	0	0.2	0.133333	0.0666667	0	0	0.0666667	0	0.0512821	0.067516		0.5	3	8.46667	3.4	0.866667	9.13333	2.4	6	6.46667	6.46667	9.66667	4.4	8.33333	6.26667	5.75897	2.77149
0.75	0	0	0	0	0	0	0.133333	0	0	0	0	0.133333	0	0.0205128	0.0500712		0.75	3	7.86667	3.8	0.4	4.4	2.26667	8.73333	3.93333	5.66667	5.86667	4.93333	4.6	4.73333	4.63077	2.18676
1	0	0	0	0	0	0.133333	0.0666667	0	0	0	0	0.0666667	0	0.0205128	0.0420283		1	5.33333	7.13333	3.4	0.333333	7.46667	3.06667	7.33333	2.4	3	5.26667	3.8	6.06667	4.33333	4.53333	2.14649
1.25	0	0	0	0	0.133333	0	0.266667	0	0	0	0	0.0666667	0.0666667	0.0410256	0.0795285		1.25	4.93333	6	2.2	0.8	7.73333	2.53333	7.33333	2.53333	2.66667	5.66667	3.6	6.33333	4.93333	4.40513	2.17178
1.5	0	0	0	0	0.266667	0.266667	0	0	0	0	0	0.0666667	0	0.0461538	0.0995717		1.5	4.33333	4.8	3.86667	0.6	9.4	3.46667	6.93333	2.33333	1.46667	5.66667	2.93333	5.33333	5.06667	4.32308	2.32822
1.75	0	0	0.0666667	0	0.2	0	0.0666667	0	0	0	0	0.0666667	0.0666667	0.0358974	0.0584705		1.75	4.73333	4.8	2.53333	1.6	9.8	3.73333	5.4	2.4	0.933333	8.66667	2.8	4.86667	5.66667	4.45641	2.59427
2	0	0	0	0.133333	0.266667	0	0.133333	0	0	0	0	0.0666667	0.0666667	0.0512821	0.0823446		2	4.4	4.26667	2.26667	6.93333	10.3333	3.2	3.86667	1.26667	1.53333	9.06667	2.8	5.53333	4.8	4.6359	2.75394
2.25	0	0	0.0666667	0.333333	0.4	0	0.0666667	0	0	0	0	0.0666667	0	0.0717949	0.134609		2.25	3.86667	4.06667	2.73333	9.8	8.53333	3.73333	5.53333	1.53333	0.933333	7.33333	2.2	4	4.8	4.54359	2.65955
2.5	0	0	0	0.533333	0.133333	0	0.0666667	0	0.0666667	0	0	0.0666667	0.133333	0.0769231	0.146176		2.5	3.4	4.26667	2.8	9.46667	8	2.66667	5	1.33333	0.933333	4.6	2.13333	5.73333	5.06667	4.26154	2.48573
2.75	0	0	0.0666667	0.333333	0	0	0	0	0.0666667	0	0	0.0666667	0	0.0410256	0.09245		2.75	3.86667	3.46667	2.46667	4.8	5.73333	2.93333	3.8	1.06667	1.66667	6.4	2.86667	4.53333	6	3.81538	1.64343
3	0	0.0666667	0.0666667	0.266667	0	0.133333	0	0	0.0666667	0	0	0.266667	0	0.0666667	0.0981307		3	3.06667	4.33333	2.73333	5.8	5.2	3.33333	4	1	1.2	6.8	2.46667	5.2	5.86667	3.92308	1.81635
3.25	0	0	0.133333	0.4	0	0	0.0666667	0	0	0	0	0.2	0	0.0615385	0.120066		3.25	2.86667	3.4	2.73333	6	6.13333	3.6	3.8	1.8	1.73333	7	2.33333	6.86667	5.8	4.15897	1.93401
3.5	0	0	0.133333	0.4	0.133333	0.133333	0.0666667	0	0.333333	0	0	0	0	0.0923077	0.134821		3.5	2.46667	3.13333	2.8	6.73333	4.73333	3.46667	3.86667	2.06667	2.46667	8.66667	1.6	6.13333	6	4.1641	2.13466
3.75	0	0	0.0666667	0.4	0.0666667	0	0	0	0.133333	0	0	0.0666667	0.0666667	0.0615385	0.110425		3.75	3.06667	3.46667	2.93333	4.53333	4.4	3.86667	4.06667	2.26667	1.93333	7.53333	2.2	4.46667	6.26667	3.92308	1.60828
4	0	0.0666667	0.333333	0.533333	0	0	0.0666667	0.0666667	0.133333	0	0	0.2	0.0666667	0.112821	0.159594		4	2.93333	3.4	2.6	3.53333	5.4	3.06667	4.06667	1.86667	1.86667	6.8	1.4	4.4	6.06667	3.64615	1.65873
4.25	0	0.266667	0.133333	0.4	0	0	0.266667	0	0.133333	0	0	0.133333	0	0.102564	0.135032		4.25	3.13333	4.13333	1.73333	3.8	4.53333	2.53333	4.26667	1.8	1.8	5.6	2.26667	4.93333	5.46667	3.53846	1.41276
4.5	0	0.0666667	0.2	0.133333	0	0	0.0666667	0	0.2	0	0	0.0666667	0	0.0564103	0.0762362		4.5	2.6	2.66667	2.73333	4.46667	5.33333	3.06667	3.86667	2	2.06667	7	1.53333	4.6	5.86667	3.67692	1.67174
4.75	0	0.0666667	0.133333	0.333333	0.0666667	0	0.133333	0	0.2	0	0	0.2	0	0.0871795	0.106752		4.75	2.6	2.86667	2.86667	6	6.26667	3.2	3.6	2.06667	1.33333	5.8	1.8	5.2	4.46667	3.69744	1.67986
5	0	0.133333	0.333333	0.466667	0.0666667	0	0.0666667	0.0666667	0.2	0	0	0.333333	0	0.128205	0.157437		5	2.93333	4.06667	2.6	2.73333	5.93333	4.8	5.4	1.53333	1.73333	6.66667	1.26667	5.86667	4.8	3.87179	1.843
5.25	0	0.2	0.266667	0.466667	0.0666667	0	0	0.0666667	0.0666667	0	0	0.2	0	0.102564	0.143024		5.25	2.53333	4.06667	1.26667	4.53333	6.06667	3.6	4.26667	1.4	1.2	6.86667	1.53333	4.66667	4.4	3.56923	1.85983
5.5	0.133333	0.0666667	0.4	0.333333	0	0	0.2	0	0.133333	0	0	0.0666667	0	0.102564	0.135032		5.5	2.4	2.66667	2.06667	6	4.8	3.33333	4.6	1.93333	1.86667	7.53333	1.73333	5	5.33333	3.78974	1.87456
5.75	0	0.0666667	0.466667	0.2	0.0666667	0	0	0.133333	0.133333	0	0	0.0666667	0	0.0871795	0.131613		5.75	2.53333	3.6	2.66667	2.8	5.26667	4.13333	3.93333	2.26667	1.8	6.26667	1.66667	4.73333	5.2	3.60513	1.45868
6	0	0.2	0.266667	0.466667	0	0.133333	0.0666667	0	0.133333	0	0	0.133333	0	0.107692	0.140207		6	2	4.4	2	3.33333	4.8	4.13333	3.66667	1.86667	1.2	7.06667	1	5.6	4.13333	3.47692	1.80716
6.25	0	0.0666667	0.466667	0.4	0	0	0.133333	0	0.0666667	0	0	0.2	0	0.102564	0.160128		6.25	2.8	3.73333	1.66667	2.93333	4.13333	4	4.26667	1.46667	1.93333	7	1.66667	5.13333	4.86667	3.50769	1.6381
6.5	0.0666667	0.0666667	0.4	0.333333	0	0	0.0666667	0	0	0	0	0.266667	0	0.0923077	0.142825		6.5	2.53333	3.46667	1.73333	3.8	4.6	4.53333	4.86667	1.93333	1.46667	7.46667	1.4	6.26667	5.8	3.8359	1.96857
6.75	0.2	0.133333	0.4	0.4	0	0.266667	0.0666667	0.0666667	0.133333	0	0	0.133333	0	0.138462	0.142625		6.75	2.4	3.13333	2.33333	3.86667	5.2	3.2	4.33333	1.93333	2.93333	7.4	1.53333	4.06667	5.8	3.70256	1.66947
7	0.0666667	0.133333	0.666667	0.466667	0	0	0.0666667	0	0	0	0	0.0666667	0	0.112821	0.209735		7	2.26667	3.8	1.66667	4.46667	4.73333	2.26667	4.06667	1.8	2.66667	6.13333	2.2	4.53333	6	3.58462	1.5466
7.25	0.0666667	0.2	0.0666667	0.666667	0	0	0.0666667	0	0	0	0	0.333333	0	0.107692	0.195388		7.25	2.93333	3.93333	2.33333	3.2	4.13333	4.8	4.2	1.53333	1.8	7.06667	1.4	4.4	5	3.59487	1.61692
7.5	0.0666667	0	0.666667	0.533333	0	0.133333	0.133333	0	0.266667	0	0	0.266667	0	0.158974	0.220334		7.5	2.06667	3.6	1.46667	4.13333	4.8	2.66667	4.86667	2.53333	2.46667	5.8	1.13333	3.93333	5.13333	3.43077	1.48713
7.75	0.0666667	0.4	0.266667	0.2	0	0	0.133333	0	0.0666667	0	0	0.266667	0	0.107692	0.134821		7.75	2.53333	3.93333	2.2	4.53333	4	3.2	5.26667	1.53333	1.4	6.53333	1.2	4.73333	5.53333	3.58462	1.72415
8	0.133333	0.0666667	0.466667	0.333333	0	0	0.0666667	0	0.2	0	0	0.133333	0	0.107692	0.14792		8	2.26667	2.46667	1.4	4.13333	5.86667	4.66667	4.8	1.53333	2	7.4	1.4	4.93333	5	3.68205	1.95072
8.25	0.133333	0.266667	0.6	0.2	0	0	0.0666667	0	0.133333	0	0	0.2	0	0.123077	0.171801		8.25	1.73333	3.33333	1.93333	2.8	5.93333	3.86667	5	1.4	1.8	6.53333	1.4	5.86667	5.26667	3.60513	1.91243
8.5	0	0.266667	0.333333	0.333333	0	0	0	0	0.133333	0	0	0.133333	0	0.0923077	0.134821		8.5	2.8	3.6	2.53333	5.8	5.4	4.53333	4.46667	1.26667	1.73333	7.93333	1.26667	5.33333	4.8	3.95897	1.98747
8.75	0	0	0.6	0.533333	0.133333	0	0	0.0666667	0	0	0.0666667	0.2	0	0.123077	0.207		8.75	2.13333	4.73333	2.46667	3.73333	5.13333	2.4	3.53333	2	0.666667	6.8	1.53333	4.6	5.13333	3.45128	1.7624
9	0.133333	0.2	0.533333	0.6	0.0666667	0	0.0666667	0	0.133333	0	0	0.2	0.133333	0.158974	0.195388		9	1.4	3.4	2	3.6	5.33333	4	4.2	1.86667	1.86667	7.06667	1.33333	5.6	5.13333	3.6	1.83666
9.25	0.266667	0.133333	0.4	0.4	0.0666667	0	0.2	0	0.0666667	0	0	0.133333	0	0.128205	0.147727		9.25	2.06667	4.66667	1.86667	3.13333	3.6	3.33333	4.46667	1.8	1.6	5.86667	1.6	5.26667	6.53333	3.52308	1.7131
9.5	0.0666667	0.133333	0.666667	0.266667	0	0	0.0666667	0	0.533333	0	0	0.133333	0	0.14359	0.219167		9.5	2.8	3.8	1.53333	4	4.66667	2.8	4	1	2.33333	6.4	1.26667	4.73333	5.06667	3.41538	1.62507
9.75	0.0666667	0.0666667	0.533333	0.2	0	0	0.133333	0	0.0666667	0	0	0.333333	0	0.107692	0.162249		9.75	1.73333	3.46667	2.13333	4	5.06667	2.66667	3.86667	1.86667	1	6.53333	1.4	5.93333	4.66667	3.41026	1.78488
10	0	0.2	0.333333	0.6	0.133333	0	0.2	0	0.0666667	0	0	0.2	0	0.133333	0.178471		10	1.53333	4.26667	1.8	4.73333	4.2	2.4	5.13333	1.13333	2.06667	6.46667	1.46667	3.6	5.4	3.4	1.76341

## Sheet: Fig 3G 3H 3I
Figure 3G - Sciatic Nerve Stim Response - All				Figure 3H - Sciatic Nerve Stim Response - Burst				Figure 3I - Sciatic Nerve Stim Response - Single
	Firing Rate (spikes/s)				Firing Rate (bursts/s)				Firing Rate (spikes/s)
	BL	NS			BL	NS			BL	NS
Unit2	2.785	4.14167		Unit2	0.138333	0.00833333		Unit2	2.46667	4.125
Unit3	4.28167	6.26667		Unit3	0.188333	0.0333333		Unit3	3.6	6.16667
Unit6	3.47333	3.425		Unit6	0.225	0.1		Unit6	2.89	3.19167
Unit8	4.42333	2.03333		Unit8	0.445	0.0666667		Unit8	3.4	1.84167
Unit12	5.27333	8.50833		Unit12	0.0433333	0.0166667		Unit12	5.13333	8.475
Unit13	3.57833	3.15		Unit13	0.265	0.05		Unit13	2.965	3.05
Unit16	2.12833	6.475		Unit16	0.0433333	0.1		Unit16	2.02667	6.25833
Unit18	0.64	3.16667		Unit18	0	0.0166667		Unit18	0.64	3.125
Unit20	2.56167	3.89167		Unit20	0.18	0.108333		Unit20	2.12167	3.55833
Unit24	1.13	7.30833		Unit24	0.0166667	0		Unit24	1.09333	7.30833
Unit25	1.11167	3.44167		Unit25	0.0116667	0		Unit25	1.085	3.44167
Unit27	6.02667	6.525		Unit27	0.271667	0.0916667		Unit27	5.30333	6.31667
Unit30	2.4	5.36667		Unit30	0	0.025		Unit30	2.4	5.30833

## Sheet: Fig 3J 3K 
Figure 3J - Time Course Binned Firing Rates - Representative Unit				Figure 3K - Time Course ISIs - Representative Unit
Time (s)	Firing Rate (spikes/s)	Firing Rate Smooth (spikes/s)		Time (s)	ISI (ms)	Time (s)	Firing Rate Smooth (spikes/s)
10	5.8	5.8		0.151839	135.291	10	5.8
20	4.5	4.9		0.28713	187.802	20	4.9
30	4.4	4.76		0.474932	235.684	30	4.76
40	4.9	4.64		0.710617	164.332	40	4.64
50	4.2	4.72		0.874949	161.219	50	4.72
60	5.2	4.62		1.03617	673.138	60	4.62
70	4.9	4.64		1.70931	3.72737	70	4.64
80	3.9	4.66		1.71303	3.35873	80	4.66
90	5	4.14		1.71639	12.329	90	4.14
100	4.3	4.02		1.72872	125.42	100	4.02
110	2.6	4.08		1.85414	305.644	110	4.08
120	4.3	3.82		2.15979	170.025	120	3.82
130	4.2	3.34		2.32981	295.527	130	3.34
140	3.7	3.34		2.62534	95.1913	140	3.34
150	1.9	3.22		2.72053	613.214	150	3.22
160	2.6	3.04		3.33374	304.006	160	3.04
170	3.7	3.76		3.63775	99.0825	170	3.76
180	3.3	5		3.73683	125.338	180	5
190	7.3	5.88		3.86217	62.9966	190	5.88
200	8.1	6.48		3.92517	157.737	200	6.48
210	7	8.34		4.0829	606.005	210	8.34
220	6.7	9.04		4.68891	107.275	220	9.04
230	12.6	9.94		4.79618	111.862	230	9.94
240	10.8	10.74		4.90804	815.516	240	10.74
250	12.6	11.72		5.72356	3.52257	250	11.72
260	11	11.4		5.72708	197.633	260	11.4
270	11.6	11.56		5.92472	3.93217	270	11.56
280	11	11.18		5.92865	5.24289	280	11.18
290	11.6	10.46		5.93389	12.9024	290	10.46
300	10.7	9.34		5.94679	52.388	300	9.34
310	7.4	8.24		5.99918	296.756	310	8.24
320	6	6.94		6.29594	7.61858	320	6.94
330	5.5	6.24		6.30356	9.78947	330	6.24
340	5.1	5.82		6.31334	20.9716	340	5.82
350	7.2	5.54		6.33432	25.3133	350	5.54
360	5.3	5.84		6.35963	36.6183	360	5.84
370	4.6	5.92		6.39625	1059.97	370	5.92
380	7	5.84		7.45621	3.39969	380	5.84
390	5.5	5.48		7.45961	3.27681	390	5.48
400	6.8	5.76		7.46289	174.449	400	5.76
410	3.5	5.2		7.63734	4.21889	410	5.2
420	6	4.94		7.64156	4.62849	420	4.94
430	4.2	4.38		7.64619	79.053	430	4.38
440	4.2	4.98		7.72524	141.681	440	4.98
450	4	5.2		7.86692	98.55	450	5.2
460	6.5	5.72		7.96547	121.815	460	5.72
470	7.1	6.22		8.08729	62.0136	470	6.22
480	6.8	6.84		8.1493	75.3666	480	6.84
490	6.7	6.46		8.22467	94.0854	490	6.46
500	7.1	5.96		8.31875	107.397	500	5.96
510	4.6	5.68		8.42615	147.579	510	5.68
520	4.6	5.1		8.57373	89.7026	520	5.1
530	5.4	4.58		8.66343	298.435	530	4.58
540	3.8	4.82		8.96187	207.053	540	4.82
550	4.5	4.76		9.16892	157.164	550	4.76
560	5.8	4.96		9.32608	403.703	560	4.96
570	4.3	5.36		9.72979	217.744	570	5.36
580	6.4	5.56		9.94753	604.858	580	5.56
590	5.8	5.9		10.5524	35.5943	590	5.9
600	5.5	5.5		10.588	146.596	600	5.5
				10.7346	328.91
				11.0635	357.09
				11.4206	127.427
				11.548	477.595
				12.0256	270.541
				12.2961	520.234
				12.8164	6.38978
				12.8228	5.20193
				12.828	14.7456
				12.8427	29.0817
				12.8718	27.3614
				12.8992	51.0773
				12.9502	62.0955
				13.0123	64.8808
				13.0772	491.685
				13.5689	81.142
				13.65	490.62
				14.1407	521.545
				14.6622	3.27681
				14.6655	1451.38
				16.1169	5.36577
				16.1222	4.46465
				16.1267	14.2132
				16.1409	424.183
				16.5651	16.7527
				16.5818	1046.12
				17.628	3.35873
				17.6313	3.03105
				17.6343	3.27681
				17.6376	4.13697
				17.6418	5.32481
				17.6471	84.7055
				17.7318	78.4796
				17.8103	70.4923
				17.8808	625.788
				18.5066	68.8949
				18.5754	164.168
				18.7396	128.492
				18.8681	175.924
				19.044	171.951
				19.216	260.179
				19.4762	483.944
				19.9601	571.516
				20.5316	4.91521
				20.5365	4.83329
				20.5414	39.8132
				20.5812	1100.11
				21.6813	3.31777
				21.6846	258.376
				21.943	4.66945
				21.9477	4.62849
				21.9523	12.1652
				21.9644	268.371
				22.2328	96.9526
				22.3298	338.822
				22.6686	63.3243
				22.7319	425.453
				23.1574	363.603
				23.521	133.981
				23.655	1008.6
				24.6636	406.365
				25.0699	89.0063
				25.1589	82.6575
				25.2416	657.246
				25.8988	3.35873
				25.9022	3.15393
				25.9053	3.85025
				25.9092	4.99713
				25.9142	8.5197
				25.9227	1565.54
				27.4882	3.11297
				27.4914	2.94913
				27.4943	4.71041
				27.499	159.785
				27.6588	4.17793
				27.663	4.05505
				27.667	28.8769
				27.6959	660.809
				28.3567	421.561
				28.7783	204.063
				28.9823	395.06
				29.3774	401.286
				29.7787	5.07905
				29.7838	4.58753
				29.7884	14.5818
				29.8029	56.8936
				29.8598	334.48
				30.1943	715.819
				30.9101	3.60449
				30.9137	3.35873
				30.9171	4.01409
				30.9211	7.37282
				30.9285	211.354
				31.1398	17.8996
				31.1577	13.6807
				31.1714	68.6491
				31.2401	216.843
				31.4569	309.986
				31.7669	446.793
				32.2137	169.698
				32.3834	559.638
				32.943	9.17506
				32.9522	9.66658
				32.9619	25.1495
				32.987	345.498
				33.3325	327.968
				33.6605	119.89
				33.7804	267.306
				34.0477	1870.28
				35.918	3.97313
				35.9219	3.44065
				35.9254	3.89121
				35.9293	6.43074
				35.9357	7.82338
				35.9435	48.8654
				35.9924	28.795
				36.0212	63.1605
				36.0843	61.3582
				36.1457	718.809
				36.8645	9.7485
				36.8743	236.749
				37.111	211.436
				37.3224	1610.76
				38.9332	4.83329
				38.938	3.89121
				38.9419	4.95617
				38.9469	27.1156
				38.974	32.85
				39.0068	38.011
				39.0449	71.1477
				39.116	680.388
				39.7964	3.80929
				39.8002	3.31777
				39.8035	4.21889
				39.8077	4.99713
				39.8127	190.546
				40.0033	58.4501
				40.0617	1661.18
				41.7229	3.19489
				41.7261	2.94913
				41.729	3.27681
				41.7323	3.85025
				41.7362	9.29794
				41.7455	39.6903
				41.7852	72.8271
				41.858	507.332
				42.3653	4.54657
				42.3699	4.34177
				42.3742	8.56066
				42.3828	2015.61
				44.3984	3.97313
				44.4024	3.39969
				44.4058	3.72737
				44.4095	4.25985
				44.4137	8.47874
				44.4222	94.6178
				44.5168	442.041
				44.9589	8.97026
				44.9678	16.2612
				44.9841	38.8302
				45.0229	67.8709
				45.0908	54.436
				45.1452	127.181
				45.2724	1017.49
				46.2899	6.22594
				46.2961	2.74433
				46.2989	6.75842
				46.3056	47.9643
				46.3536	1214.79
				47.5684	3.52257
				47.5719	3.11297
				47.575	6.71746
				47.5818	592.488
				48.1742	4.75137
				48.179	4.54657
				48.1835	7.16802
				48.1907	562.136
				48.7528	1964.04
				50.7169	3.52257
				50.7204	3.03105
				50.7234	3.48161
				50.7269	4.30081
				50.7312	71.885
				50.8031	1277.63
				52.0807	3.31777
				52.0841	2.94913
				52.087	3.39969
				52.0904	244.368
				52.3348	20.562
				52.3553	610.183
				52.9655	4.25985
				52.9698	3.60449
				52.9734	424.019
				53.3974	4.13697
				53.4015	3.48161
				53.405	4.13697
				53.4092	8.1101
				53.4173	252.929
				53.6702	110.306
				53.7805	263.414
				54.0439	398.747
				54.4427	66.765
				54.5094	483.083
				54.9925	86.3439
				55.0788	65.0037
				55.1439	610.633
				55.7545	19.1693
				55.7737	36.4545
				55.8101	51.6097
				55.8617	43.2129
				55.9049	104.858
				56.0098	156.754
				56.1665	507.741
				56.6743	4.25985
				56.6785	3.72737
				56.6823	4.95617
				56.6872	106.578
				56.7938	1011.1
				57.8049	4.13697
				57.809	176.907
				57.986	4.38273
				57.9903	4.05505
				57.9944	448.595
				58.443	6.92226
				58.4499	6.6765
				58.4566	15.2372
				58.4718	19.1693
				58.491	77.5784
				58.5686	44.8104
				58.6134	1511.39
				60.1248	3.64545
				60.1284	3.72737
				60.1321	713.73
				60.8459	3.11297
				60.849	4.13697
				60.8531	4.46465
				60.8576	99.1644
				60.9567	520.562
				61.4773	12.7796
				61.4901	18.2682
				61.5084	48.0872
				61.5564	591.546
				62.148	4.38273
				62.1524	3.60449
				62.156	5.32481
				62.1613	11.0592
				62.1724	113.255
				62.2856	131.851
				62.4175	726.591
				63.1441	3.93217
				63.148	3.35873
				63.1513	7.7005
				63.159	565.454
				63.7245	162.284
				63.8868	533.956
				64.4207	4.13697
				64.4249	2170.6
				66.5955	3.35873
				66.5988	2.99009
				66.6018	3.44065
				66.6053	4.01409
				66.6093	5.48865
				66.6148	778.16
				67.3929	4.38273
				67.3973	3.60449
				67.4009	4.25985
				67.4052	5.65249
				67.4108	12.2471
				67.4231	32.7681
				67.4558	37.6423
				67.4935	64.635
				67.5581	589.457
				68.1476	4.95617
				68.1525	3.93217
				68.1565	106.291
				68.2628	201.647
				68.4644	646.924
				69.1113	717.539
				69.8289	655.034
				70.4839	6.71746
				70.4906	8.27394
				70.4989	32.6862
				70.5316	740.231
				71.2718	3.48161
				71.2753	3.19489
				71.2785	3.56353
				71.2821	4.99713
				71.287	530.925
				71.818	593.512
				72.4115	4.66945
				72.4162	4.17793
				72.4203	13.0663
				72.4334	207.176
				72.6406	187.392
				72.828	153.682
				72.9816	78.2748
				73.0599	506.349
				73.5663	2266.77
				75.833	3.60449
				75.8367	3.11297
				75.8398	3.52257
				75.8433	4.34177
				75.8476	32.7271
				75.8804	48.21
				75.9286	41.4107
				75.97	23.1834
				75.9932	1578.89
				77.572	4.17793
				77.5762	3.23585
				77.5795	407.021
				77.9865	4.34177
				77.9908	8.76546
				77.9996	1219.96
				79.2195	3.11297
				79.2227	2.90817
				79.2256	3.35873
				79.2289	4.91521
				79.2338	1202.59
				80.4364	3.60449
				80.44	6.63554
				80.4467	4.38273
				80.4511	16.6708
				80.4677	54.5589
				80.5223	38.4206
				80.5607	558.655
				81.1194	996.15
				82.1155	3.80929
				82.1193	3.31777
				82.1226	10.6087
				82.1332	236.422
				82.3697	166.134
				82.5358	97.6079
				82.6334	253.011
				82.8864	113.951
				83.0004	103.465
				83.1038	321.496
				83.4253	23.2244
				83.4486	102.318
				83.5509	232.039
				83.7829	272.344
				84.0553	5.61153
				84.0609	6.02114
				84.0669	411.362
				84.4783	557.795
				85.036	6.10306
				85.0421	226.714
				85.2689	7.61858
				85.2765	10.0762
				85.2866	32.5223
				85.3191	48.7016
				85.3678	66.9698
				85.4348	159.253
				85.594	95.0684
				85.6891	712.911
				86.402	192.021
				86.594	332.965
				86.927	402.31
				87.3293	360.94
				87.6902	796.797
				88.487	5.61153
				88.4926	4.17793
				88.4968	5.69345
				88.5025	23.7569
				88.5263	52.388
				88.5786	382.281
				88.9609	482.141
				89.4431	6.14402
				89.4492	1220.73
				90.6699	4.21889
				90.6742	267.551
				90.9417	4.58753
				90.9463	4.21889
				90.9505	881.912
				91.8324	3.68641
				91.8361	294.012
				92.1301	21.9956
				92.1521	26.3783
				92.1785	78.3157
				92.2568	90.2351
				92.3471	147.784
				92.4948	1193.62
				93.6885	160.85
				93.8493	444.54
				94.2938	310.764
				94.6046	152.413
				94.757	573.564
				95.3306	1093.18
				96.4238	5.03809
				96.4288	3.64545
				96.4325	5.93922
				96.4384	9.42082
				96.4478	12.7796
				96.4606	31.5802
				96.4922	248.259
				96.7404	78.6024
				96.819	230.605
				97.0496	1017.49
				98.0671	687.556
				98.7547	3.31777
				98.758	318.752
				99.0768	4.99713
				99.0818	3.97313
				99.0857	6.92226
				99.0927	20.4391
				99.1131	696.69
				99.8098	4.46465
				99.8142	3.68641
				99.8179	4.87425
				99.8228	12.329
				99.8351	62.4642
				99.8976	598.386
				100.496	110.92
				100.607	2268.9
				102.876	3.23585
				102.879	500
				103.379	4.54657
				103.384	3.56353
				103.387	4.66945
				103.392	9.17506
				103.401	288.072
				103.689	130.499
				103.82	1786.56
				105.606	3.11297
				105.609	2.94913
				105.612	3.15393
				105.615	240.149
				105.855	6.43074
				105.862	1042.68
				106.905	3.03105
				106.908	3.52257
				106.911	3.89121
				106.915	6.63554
				106.922	369.01
				107.291	200.049
				107.491	519.989
				108.011	935.447
				108.946	1099.29
				110.045	3.80929
				110.049	3.19489
				110.052	3.64545
				110.056	4.91521
				110.061	67.9938
				110.129	54.9685
				110.184	51.5278
				110.236	459.409
				110.695	4.50561
				110.699	6.6765
				110.706	83.7634
				110.79	1141.52
				111.931	6.8813
				111.938	281.478
				112.22	3.93217
				112.224	3.80929
				112.227	4.17793
				112.232	417.302
				112.649	218.44
				112.867	635.865
				113.503	1814.78
				115.318	6.34882
				115.324	3.68641
				115.328	134.431
				115.463	680.347
				116.143	3.80929
				116.147	3.11297
				116.15	4.21889
				116.154	7.2909
				116.161	1163.92
				117.325	3.27681
				117.329	3.07201
				117.332	3.23585
				117.335	358.36
				117.693	4.66945
				117.698	4.09601
				117.702	397.641
				118.1	429.016
				118.529	311.338
				118.84	948.595
				119.789	3.19489
				119.792	2.94913
				119.795	302.859
				120.098	4.38273
				120.102	4.21889
				120.106	929.221
				121.035	3.35873
				121.039	6.10306
				121.045	1058.61
				122.103	7.98722
				122.111	490.579
				122.602	3.93217
				122.606	3.44065
				122.609	4.09601
				122.613	9.95331
				122.623	14.4589
				122.638	28.0986
				122.666	81.1829
				122.747	60.58
				122.808	1334.15
				124.142	6.96322
				124.149	433.399
				124.582	4.54657
				124.587	3.93217
				124.591	13.312
				124.604	71.2296
				124.675	279.43
				124.955	1294.26
				126.249	3.80929
				126.253	2.49857
				126.255	253.461
				126.509	4.17793
				126.513	3.56353
				126.516	7.57762
				126.524	665.438
				127.189	3.85025
				127.193	848.816
				128.042	3.85025
				128.046	4.21889
				128.05	336.774
				128.387	63.9387
				128.451	1373.47
				129.824	4.50561
				129.829	3.48161
				129.832	265.585
				130.098	11.1821
				130.109	24.7399
				130.134	59.8837
				130.194	260.629
				130.454	322.561
				130.777	925.78
				131.703	9.21602
				131.712	35.0618
				131.747	70.6152
				131.818	667.568
				132.485	3.85025
				132.489	212.911
				132.702	326.37
				133.028	892.316
				133.921	819.161
				134.74	4.83329
				134.745	4.42369
				134.749	581.633
				135.331	522.979
				135.854	113.009
				135.967	5.69345
				135.972	3.31777
				135.976	2.86721
				135.979	543.254
				136.522	5.85729
				136.528	504.956
				137.033	4.01409
				137.037	3.31777
				137.04	7.0861
				137.047	684.443
				137.732	439.092
				138.171	270.255
				138.441	53.4939
				138.494	278.242
				138.773	1017.41
				139.79	123.577
				139.914	2796.06
				142.71	286.27
				142.996	516.753
				143.513	48.0462
				143.561	202.793
				143.763	654.01
				144.418	6.0621
				144.424	199.025
				144.623	241.009
				144.864	1816.09
				146.68	414.803
				147.094	270.787
				147.365	1311.58
				148.677	4.17793
				148.681	3.85025
				148.685	618.211
				149.303	5.03809
				149.308	442.861
				149.751	9.99427
				149.761	779.594
				150.541	4.38273
				150.545	4.54657
				150.55	201.933
				150.751	542.476
				151.294	245.064
				151.539	454.125
				151.993	111.534
				152.105	348.243
				152.453	294.012
				152.747	1254.4
				154.001	283.28
				154.285	445.195
				154.73	102.195
				154.832	65.3314
				154.897	741.255
				155.639	1129.11
				156.768	1386.75
				158.154	192.717
				158.347	516.835
				158.864	3.60449
				158.868	7.00418
				158.875	205.784
				159.08	29.3684
				159.11	30.4743
				159.14	50.6267
				159.191	1136.07
				160.327	8.88834
				160.336	148.931
				160.485	100.352
				160.585	480.831
				161.066	335.914
				161.402	903.334
				162.305	1353.85
				163.659	2.86721
				163.662	3.68641
				163.666	1089.29
				164.755	10.4858
				164.765	262.472
				165.028	4.66945
				165.032	4.46465
				165.037	196.117
				165.233	515.442
				165.749	225.076
				165.974	654.051
				166.628	643.729
				167.271	236.34
				167.508	739.617
				168.247	3.52257
				168.251	3.76833
				168.255	4.38273
				168.259	6.30786
				168.265	190.505
				168.456	86.262
				168.542	95.8876
				168.638	267.388
				168.905	30.3105
				168.936	25.2724
				168.961	27.2385
				168.988	34.4065
				169.023	39.0759
				169.062	158.188
				169.22	397.6
				169.617	415.172
				170.033	1442.37
				171.475	114.934
				171.59	111.452
				171.701	200.254
				171.902	447.325
				172.349	245.843
				172.595	669.78
				173.265	150.119
				173.415	48.8244
				173.464	90.4809
				173.554	97.2393
				173.651	82.0021
				173.733	1029.2
				174.762	79.9132
				174.842	545.425
				175.388	212.46
				175.6	474.195
				176.074	6.22594
				176.081	204.145
				176.285	57.9176
				176.343	208.733
				176.551	105.308
				176.657	351.274
				177.008	255.468
				177.263	529.123
				177.793	378.471
				178.171	489.391
				178.66	422.995
				179.083	171.991
				179.255	153.723
				179.409	477.718
				179.887	43.0491
				179.93	180.798
				180.111	65.4542
				180.176	120.668
				180.297	32.6862
				180.33	50.299
				180.38	85.5657
				180.465	78.6434
				180.544	91.7916
				180.636	61.604
				180.697	66.0277
				180.763	39.4446
				180.803	30.5562
				180.833	44.6875
				180.878	56.2382
				180.934	51.6507
				180.986	177.767
				181.164	118.702
				181.283	99.0825
				181.382	193.086
				181.575	152.372
				181.727	35.8401
				181.763	53.3301
				181.816	512.902
				182.329	176.047
				182.505	222.782
				182.728	53.2481
				182.781	99.0006
				182.88	46.244
				182.926	144.753
				183.071	139.06
				183.21	124.191
				183.334	90.4809
				183.425	112.886
				183.538	64.3893
				183.602	51.7736
				183.654	84.0911
				183.738	369.337
				184.107	109.609
				184.217	85.8933
				184.303	65.3314
				184.368	202.793
				184.571	92.406
				184.663	213.648
				184.877	508.151
				185.385	66.4783
				185.452	137.708
				185.589	153.232
				185.743	266.241
				186.009	115.139
				186.124	32.4404
				186.157	116.368
				186.273	55.0504
				186.328	131.892
				186.46	135.25
				186.595	60.58
				186.656	75.7762
				186.731	1009.75
				187.741	25.1905
				187.766	55.3781
				187.822	214.344
				188.036	522.118
				188.558	322.807
				188.881	189.809
				189.071	135.988
				189.207	210.084
				189.417	59.597
				189.476	40.9601
				189.517	88.0233
				189.605	59.0235
				189.664	62.587
				189.727	89.2111
				189.816	94.8226
				189.911	88.0642
				189.999	59.4331
				190.059	136.643
				190.195	172.278
				190.368	375.727
				190.743	129.393
				190.873	274.556
				191.147	105.308
				191.253	238.142
				191.491	58.1633
				191.549	31.0887
				191.58	274.801
				191.855	325.879
				192.181	64.3483
				192.245	111.33
				192.356	92.406
				192.449	122.798
				192.571	288.441
				192.86	196.813
				193.057	79.4216
				193.136	55.8696
				193.192	37.3966
				193.229	52.5928
				193.282	45.8344
				193.328	85.9753
				193.414	62.2594
				193.476	47.1451
				193.523	89.6207
				193.613	44.6875
				193.658	69.5093
				193.727	36.8231
				193.764	21.5041
				193.785	94.7407
				193.88	100.025
				193.98	583.641
				194.564	68.1576
				194.632	53.9854
				194.686	166.421
				194.852	137.462
				194.99	78.6434
				195.068	64.8808
				195.133	45.7934
				195.179	68.1986
				195.247	105.145
				195.352	57.508
				195.41	111.739
				195.522	290.94
				195.813	69.837
				195.882	46.5307
				195.929	165.11
				196.094	96.0924
				196.19	63.611
				196.254	255.673
				196.51	101.253
				196.611	185.672
				196.796	85.9343
				196.882	165.028
				197.047	92.3241
				197.14	127.55
				197.267	242.812
				197.51	280.495
				197.791	75.5304
				197.866	80.3637
				197.946	87.0812
				198.034	108.094
				198.142	79.9951
				198.222	33.0548
				198.255	36.4545
				198.291	80.6095
				198.372	38.4206
				198.41	81.9202
				198.492	212.05
				198.704	43.7044
				198.748	72.4175
				198.82	78.6024
				198.899	69.0997
				198.968	31.3754
				198.999	190.915
				199.19	389.285
				199.58	60.58
				199.64	135.701
				199.776	162.407
				199.938	106.128
				200.044	46.7764
				200.091	27.8119
				200.119	124.15
				200.243	86.8354
				200.33	212.378
				200.542	54.5179
				200.597	181.412
				200.778	56.8936
				200.835	58.7368
				200.894	99.2463
				200.993	45.138
				201.038	294.503
				201.333	179.159
				201.512	50.5448
				201.562	117.146
				201.68	135.865
				201.815	359.138
				202.175	176.948
				202.352	237.036
				202.589	413.369
				203.002	158.598
				203.161	101.745
				203.262	135.127
				203.397	110.838
				203.508	78.8482
				203.587	25.8458
				203.613	106.21
				203.719	59.3512
				203.779	187.433
				203.966	312.321
				204.278	70.0008
				204.348	63.2834
				204.412	38.2567
				204.45	52.1013
				204.502	60.7029
				204.563	25.641
				204.588	44.9742
				204.633	118.211
				204.751	91.4639
				204.843	53.0024
				204.896	60.7848
				204.957	43.7044
				205	132.752
				205.133	418.162
				205.551	109.486
				205.661	50.3809
				205.711	38.0519
				205.749	281.519
				206.031	225.24
				206.256	119.194
				206.375	151.102
				206.526	145.572
				206.672	370.607
				207.042	299.91
				207.342	667.977
				208.01	190.178
				208.201	162.079
				208.363	144.671
				208.507	139.019
				208.646	56.9755
				208.703	113.419
				208.817	612.272
				209.429	208.774
				209.638	63.3243
				209.701	82.9033
				209.784	56.0744
				209.84	37.1508
				209.877	41.9022
				209.919	38.4615
				209.958	168.674
				210.126	128.738
				210.255	95.1503
				210.35	160.973
				210.511	715.204
				211.226	564.348
				211.791	240.968
				212.032	273.286
				212.305	121.733
				212.427	154.993
				212.582	61.7269
				212.643	79.9951
				212.723	65.3314
				212.789	170.476
				212.959	68.7311
				213.028	172.975
				213.201	382.322
				213.583	103.998
				213.687	178.217
				213.865	142.173
				214.008	93.1842
				214.101	44.2369
				214.145	174.572
				214.32	54.9275
				214.374	5.20193
				214.38	19.6609
				214.399	62.2184
				214.462	170.353
				214.632	225.362
				214.857	332.76
				215.19	82.8213
				215.273	61.604
				215.334	60.1704
				215.395	226.55
				215.621	194.888
				215.816	452.732
				216.269	228.353
				216.497	551.2
				217.048	159.376
				217.208	21.7089
				217.229	96.6249
				217.326	125.788
				217.452	22.2413
				217.474	132.424
				217.607	81.3058
				217.688	80.3228
				217.768	117.023
				217.885	52.9205
				217.938	25.3543
				217.963	148.317
				218.112	29.9418
				218.142	26.3373
				218.168	178.996
				218.347	29.2865
				218.376	16.3021
				218.393	63.4062
				218.456	67.9528
				218.524	46.244
				218.57	163.677
				218.734	253.953
				218.988	70.6971
				219.059	242.566
				219.301	72.7042
				219.374	53.5758
				219.427	44.9742
				219.472	162.407
				219.635	97.0345
				219.732	407.266
				220.139	87.3679
				220.226	94.8636
				220.321	54.1083
				220.375	234.251
				220.61	62.5051
				220.672	81.5516
				220.754	242.607
				220.996	35.8401
				221.032	56.7707
				221.089	43.4177
				221.132	102.155
				221.235	47.5137
				221.282	152.208
				221.434	23.1425
				221.457	38.1339
				221.496	29.2046
				221.525	22.0775
				221.547	43.3768
				221.59	75.2437
				221.665	300.77
				221.966	266.773
				222.233	79.8722
				222.313	61.3173
				222.374	101.171
				222.475	53.6168
				222.529	185.304
				222.714	72.6632
				222.787	309.126
				223.096	10.9363
				223.107	116.368
				223.223	66.3963
				223.29	239.33
				223.529	233.227
				223.762	94.8226
				223.857	30.5153
				223.888	174.449
				224.062	72.0898
				224.134	37.2737
				224.171	31.3345
				224.203	110.183
				224.313	87.3269
				224.4	196.649
				224.597	113.296
				224.71	58.5729
				224.769	57.8357
				224.827	47.0222
				224.874	15.1143
				224.889	6.75842
				224.896	263.578
				225.159	41.083
				225.2	48.5377
				225.249	96.2153
				225.345	23.2244
				225.368	14.7866
				225.383	13.5988
				225.397	32.6862
				225.429	32.2356
				225.461	8.35586
				225.47	16.0154
				225.486	19.8247
				225.506	171.664
				225.677	132.055
				225.809	35.922
				225.845	37.5604
				225.883	114.975
				225.998	121.57
				226.119	84.6236
				226.204	85.4428
				226.29	162.325
				226.452	47.6776
				226.5	56.6888
				226.556	29.778
				226.586	16.5069
				226.602	31.5802
				226.634	22.6509
				226.657	62.7918
				226.72	80.5685
				226.8	115.262
				226.915	58.6958
				226.974	43.2948
				227.017	19.7018
				227.037	179.078
				227.216	27.8119
				227.244	69.2226
				227.313	14.4589
				227.328	21.2173
				227.349	20.6849
				227.37	14.4999
				227.384	19.2103
				227.403	266.2
				227.669	348.611
				228.018	23.7159
				228.042	42.4756
				228.084	71.4754
				228.156	62.7918
				228.218	7.4957
				228.226	180.716
				228.407	102.646
				228.509	46.0801
				228.555	109.527
				228.665	53.5349
				228.718	10.1581
				228.729	151.798
				228.88	47.5547
				228.928	15.1552
				228.943	6.84034
				228.95	24.5761
				228.975	39.2807
				229.014	44.3598
				229.058	77.8242
				229.136	11.9194
				229.148	7.0861
				229.155	100.229
				229.255	9.62562
				229.265	22.6509
				229.288	37.1918
				229.325	24.8628
				229.35	95.8466
				229.445	16.7936
				229.462	52.388
				229.515	268.33
				229.783	44.7694
				229.828	10.3219
				229.838	7.41378
				229.845	82.7394
				229.928	174.162
				230.102	55.419
				230.158	377.079
				230.535	178.873
				230.714	144.876
				230.859	38.2567
				230.897	197.714
				231.095	111.78
				231.206	96.6249
				231.303	47.9643
				231.351	72.0898
				231.423	124.56
				231.548	21.8727
				231.569	55.9925
				231.625	75.981
				231.701	10.1171
				231.712	645.408
				232.357	99.7379
				232.457	36.1268
				232.493	147.006
				232.64	220.898
				232.861	37.7243
				232.898	267.306
				233.166	82.3298
				233.248	58.5729
				233.307	31.0068
				233.338	113.337
				233.451	49.1931
				233.5	92.6927
				233.593	263.701
				233.857	80.118
				233.937	171.09
				234.108	75.7352
				234.184	66.6421
				234.25	67.9528
				234.318	200.295
				234.518	185.672
				234.704	81.7973
				234.786	24.6989
				234.811	187.311
				234.998	65.4133
				235.063	46.9812
				235.11	42.1479
				235.152	27.73
				235.18	24.7399
				235.205	66.5192
				235.271	228.353
				235.5	41.3697
				235.541	22.7738
				235.564	33.2596
				235.597	21.7498
				235.619	97.2393
				235.716	43.6225
				235.76	253.789
				236.014	119.726
				236.133	219.218
				236.353	68.9359
				236.421	30.9249
				236.452	26.9108
				236.479	42.3118
				236.522	40.4686
				236.562	44.6465
				236.607	62.4642
				236.669	92.7337
				236.762	48.5787
				236.811	204.596
				237.015	48.292
				237.063	115.958
				237.179	77.6604
				237.257	35.1028
				237.292	69.5912
				237.362	384.861
				237.747	176.21
				237.923	87.6137
				238.01	100.311
				238.111	77.3327
				238.188	52.2651
				238.24	38.6254
				238.279	168.879
				238.448	85.197
				238.533	21.5041
				238.555	32.6452
				238.587	21.1354
				238.608	45.7524
				238.654	35.0618
				238.689	88.1461
				238.777	73.6872
				238.851	14.1312
				238.865	21.4631
				238.887	11.3459
				238.898	24.0436
				238.922	29.9418
				238.952	11.7146
				238.964	9.7485
				238.973	122.143
				239.095	30.3105
				239.126	7.04514
				239.133	8.64258
				239.141	23.8797
				239.165	17.1623
				239.183	187.966
				239.37	328.131
				239.699	15.3191
				239.714	14.377
				239.728	37.4785
				239.766	28.6721
				239.794	106.988
				239.901	58.6958
				239.96	70.4514
				240.031	72.909
				240.104	39.8542
				240.143	26.8289
				240.17	21.7089
				240.192	22.5281
				240.214	22.1594
				240.237	30.3105
				240.267	70.6152
				240.338	73.6463
				240.411	12.0423
				240.423	31.2116
				240.454	22.6919
				240.477	126.362
				240.603	27.0746
				240.631	16.6708
				240.647	55.0913
				240.702	176.989
				240.879	91.7097
				240.971	262.513
				241.234	71.1067
				241.305	135.209
				241.44	134.308
				241.574	71.885
				241.646	100.066
				241.746	41.5745
				241.788	214.344
				242.002	48.6196
				242.051	27.771
				242.078	266.732
				242.345	101.335
				242.446	202.425
				242.649	74.7112
				242.724	52.9614
				242.777	31.1706
				242.808	18.0634
				242.826	48.4148
				242.874	142.091
				243.016	64.635
				243.081	92.0783
				243.173	287.417
				243.46	58.8187
				243.519	59.8018
				243.579	47.0632
				243.626	70.5743
				243.697	22.61
				243.719	66.5192
				243.786	71.4344
				243.857	29.4503
				243.887	98.6319
				243.985	302.695
				244.288	182.887
				244.471	111.411
				244.582	137.093
				244.719	97.1983
				244.817	68.1576
				244.885	89.0882
				244.974	31.3754
				245.005	58.6958
				245.064	93.7986
				245.158	38.5025
				245.196	107.725
				245.304	96.5839
				245.401	32.891
				245.433	13.1072
				245.447	7.82338
				245.454	21.0535
				245.475	7.20898
				245.483	77.4965
				245.56	123.618
				245.684	19.0464
				245.703	8.27394
				245.711	8.35586
				245.719	7.24994
				245.727	14.377
				245.741	33.7921
				245.775	108.421
				245.883	18.9645
				245.902	6.71746
				245.909	366.101
				246.275	51.4459
				246.326	52.6747
				246.379	102.728
				246.482	31.0478
				246.513	37.6833
				246.551	24.2893
				246.575	48.292
				246.623	62.669
				246.686	161.547
				246.847	21.7908
				246.869	50.0532
				246.919	54.8865
				246.974	235.029
				247.209	27.4433
				247.237	10.1171
				247.247	35.1847
				247.282	42.8852
				247.325	47.0222
				247.372	31.0887
				247.403	16.3431
				247.419	110.019
				247.529	144.548
				247.674	36.3316
				247.71	78.8892
				247.789	33.2596
				247.822	163.718
				247.986	49.6027
				248.036	62.0955
				248.098	135.701
				248.233	100.844
				248.334	43.7044
				248.378	59.1464
				248.437	249.652
				248.687	44.6056
				248.731	33.1777
				248.765	46.4488
				248.811	58.4501
				248.869	95.3961
				248.965	129.229
				249.094	176.415
				249.271	102.318
				249.373	159.99
				249.533	55.5419
				249.588	53.371
				249.642	38.8711
				249.681	46.3259
				249.727	325.838
				250.053	59.0645
				250.112	352.052
				250.464	67.6251
				250.531	97.567
				250.629	112.313
				250.741	57.7128
				250.799	87.0812
				250.886	83.2309
				250.969	64.3893
				251.034	40.1409
				251.074	11.1821
				251.085	63.1605
				251.148	21.4631
				251.17	45.9982
				251.216	37.0689
				251.253	55.0504
				251.308	33.0958
				251.341	47.3089
				251.388	18.0224
				251.406	24.2484
				251.431	136.602
				251.567	106.414
				251.674	272.057
				251.946	86.9583
				252.033	58.2043
				252.091	125.584
				252.216	91.1362
				252.307	57.6309
				252.365	81.06
				252.446	214.59
				252.661	68.5672
				252.729	96.0105
				252.825	20.8487
				252.846	21.4221
				252.868	15.1962
				252.883	41.3287
				252.924	15.2372
				252.939	60.0885
				252.999	166.298
				253.166	171.336
				253.337	93.5529
				253.431	23.634
				253.454	20.3162
				253.475	143.197
				253.618	24.9447
				253.643	58.4091
				253.701	25.1495
				253.726	18.1453
				253.744	11.7146
				253.756	14.9914
				253.771	92.2012
				253.863	354.346
				254.218	26.5831
				254.244	124.724
				254.369	89.2111
				254.458	76.8412
				254.535	128.205
				254.663	531.089
				255.194	79.7493
				255.274	91.7916
				255.366	158.024
				255.524	143.197
				255.667	438.191
				256.105	67.7071
				256.173	121.037
				256.294	110.715
				256.405	53.4939
				256.458	110.592
				256.569	264.848
				256.834	104.039
				256.938	23.1015
				256.961	152.085
				257.113	25.3133
				257.138	34.9799
				257.173	21.2993
				257.195	33.7102
				257.228	51.1182
				257.279	41.8203
				257.321	38.4615
				257.36	304.989
				257.665	72.0488
				257.737	22.6509
				257.759	50.258
				257.81	530.31
				258.34	21.586
				258.361	18.1863
				258.38	11.4688
				258.391	10.4858
				258.402	6.59458
				258.408	110.428
				258.519	14.2132
				258.533	24.1255
				258.557	34.4065
				258.591	10.4448
				258.602	49.7665
				258.652	17.6538
				258.669	138.691
				258.808	86.8764
				258.895	49.3569
				258.944	64.9627
				259.009	223.028
				259.232	37.3147
				259.269	74.3016
				259.344	100.926
				259.445	61.7678
				259.506	59.2693
				259.566	118.989
				259.685	57.2213
				259.742	238.388
				259.98	46.7355
				260.027	41.3287
				260.068	67.6661
				260.136	283.813
				260.42	65.7
				260.486	28.5902
				260.514	269.558
				260.784	388.138
				261.172	72.3765
				261.244	87.6546
				261.332	30.9658
				261.363	142.787
				261.506	38.8302
				261.544	263.66
				261.808	178.054
				261.986	71.7211
				262.058	31.867
				262.09	154.051
				262.244	83.8863
				262.328	34.7342
				262.362	24.1255
				262.387	48.9883
				262.436	45.3019
				262.481	46.6126
				262.527	106.496
				262.634	28.2215
				262.662	44.4008
				262.707	25.2724
				262.732	12.7796
				262.745	46.2849
				262.791	75.8991
				262.867	19.0055
				262.886	44.155
				262.93	49.8484
				262.98	108.749
				263.089	49.316
				263.138	228.23
				263.366	36.2087
				263.402	17.5719
				263.42	19.2922
				263.439	31.5393
				263.471	54.5589
				263.525	12.9844
				263.538	5.44769
				263.544	59.1874
				263.603	30.3105
				263.633	29.4913
				263.663	18.9236
				263.682	222.495
				263.904	85.0741
				263.989	206.152
				264.195	63.0376
				264.258	31.3345
				264.29	97.8537
				264.388	12.4109
				264.4	12.9844
				264.413	265.626
				264.679	59.0645
				264.738	50.5857
				264.788	41.2878
				264.83	86.3029
				264.916	45.9163
				264.962	10.24
				264.972	97.0754
				265.069	19.9066
				265.089	25.2314
				265.114	15.1143
				265.129	137.38
				265.267	34.898
				265.302	159.089
				265.461	336.856
				265.798	94.8636
				265.892	292.906
				266.185	59.1874
				266.245	27.2794
				266.272	285.205
				266.557	26.2145
				266.583	33.5873
				266.617	49.1112
				266.666	22.0365
				266.688	27.4842
				266.715	34.2426
				266.75	138.322
				266.888	94.6588
				266.983	75.3256
				267.058	59.6789
				267.118	145.449
				267.263	24.9447
				267.288	44.6056
				267.333	34.1198
				267.367	31.867
				267.399	25.0266
				267.424	38.3796
				267.462	53.8216
				267.516	25.3133
				267.541	33.0548
				267.574	219.055
				267.793	305.685
				268.099	39.2807
				268.138	38.0519
				268.176	43.8683
				268.22	179.282
				268.399	86.7945
				268.486	32.7681
				268.519	20.7258
				268.54	30.6382
				268.57	27.2794
				268.598	122.635
				268.72	31.9898
				268.752	36.3726
				268.789	309.003
				269.098	16.425
				269.114	223.601
				269.338	355.779
				269.693	71.885
				269.765	61.4811
				269.827	174.449
				270.001	62.669
				270.064	28.5902
				270.093	43.131
				270.136	104.121
				270.24	74.957
				270.315	137.503
				270.452	176.948
				270.629	34.0378
				270.663	53.1662
				270.716	59.9246
				270.776	53.2891
				270.83	75.981
				270.906	26.9517
				270.933	45.9982
				270.979	32.7271
				271.011	85.4018
				271.097	44.196
				271.141	20.6849
				271.162	10.8544
				271.172	15.4829
				271.188	7.04514
				271.195	19.1693
				271.214	22.2823
				271.236	60.0066
				271.296	26.0506
				271.322	10.0352
				271.333	30.1876
				271.363	99.9836
				271.463	39.2398
				271.502	64.1845
				271.566	38.4615
				271.605	312.198
				271.917	35.6763
				271.952	101.704
				272.054	105.022
				272.159	47.5956
				272.207	107.807
				272.315	35.5534
				272.35	106.169
				272.456	56.3611
				272.513	11.9604
				272.525	37.0689
				272.562	15.1143
				272.577	94.3721
				272.671	42.8852
				272.714	295.609
				273.01	22.5281
				273.032	14.7866
				273.047	143.729
				273.191	18.5959
				273.209	79.2988
				273.289	71.9259
				273.361	35.5124
				273.396	82.0431
				273.478	174.859
				273.653	150.078
				273.803	102.155
				273.905	79.4216
				273.985	128.779
				274.113	217.703
				274.331	110.51
				274.442	71.1477
				274.513	34.6522
				274.547	114.279
				274.662	79.6674
				274.741	41.3287
				274.783	59.0645
				274.842	53.9445
				274.896	116.572
				275.012	179.364
				275.192	54.2721
				275.246	172.524
				275.418	228.066
				275.646	70.6562
				275.717	33.833
				275.751	25.8868
				275.777	48.5377
				275.825	95.8876
				275.921	117.883
				276.039	48.8654
				276.088	169.206
				276.257	42.1889
				276.299	25.7229
				276.325	68.2395
				276.393	51.2001
				276.445	87.2041
				276.532	297.329
				276.829	243.18
				277.072	67.5432
				277.14	19.6199
				277.159	63.4472
				277.223	57.0984
				277.28	37.6833
				277.318	102.155
				277.42	443.311
				277.863	383.632
				278.247	78.9301
				278.326	31.9079
				278.358	114.975
				278.473	155.034
				278.628	89.5797
				278.717	44.8104
				278.762	216.597
				278.979	32.4814
				279.011	67.1336
				279.078	483.288
				279.562	154.01
				279.716	195.462
				279.911	80.4456
				279.991	168.469
				280.16	94.1263
				280.254	70.7791
				280.325	18.0224
				280.343	34.7342
				280.378	234.742
				280.612	60.9486
				280.673	20.8487
				280.694	31.5802
				280.726	18.1044
				280.744	58.2453
				280.802	310.723
				281.113	47.6776
				281.16	59.6379
				281.22	648.235
				281.868	423.527
				282.292	16.1792
				282.308	36.1678
				282.344	31.6212
				282.376	153.764
				282.53	125.461
				282.655	49.316
				282.704	69.3864
				282.774	97.6899
				282.871	110.715
				282.982	158.72
				283.141	46.6945
				283.188	98.7958
				283.286	27.4842
				283.314	15.5239
				283.329	7.41378
				283.337	15.5648
				283.352	35.8811
				283.388	8.97026
				283.397	42.2708
				283.439	89.7026
				283.529	81.2239
				283.61	23.3473
				283.634	118.989
				283.753	52.7976
				283.806	44.3188
				283.85	31.0068
				283.881	30.5562
				283.911	8.06914
				283.919	14.2132
				283.934	13.7216
				283.947	9.09314
				283.957	19.2512
				283.976	68.8949
				284.045	110.224
				284.155	47.4728
				284.202	25.2314
				284.228	75.8172
				284.303	54.1493
				284.358	20.8897
				284.378	58.491
				284.437	157.041
				284.594	57.467
				284.651	33.5054
				284.685	63.1605
				284.748	47.268
				284.795	43.7454
				284.839	14.7866
				284.854	8.5197
				284.862	22.2823
				284.885	23.9207
				284.909	12.1652
				284.921	43.3358
				284.964	26.8698
				284.991	42.6395
				285.034	51.364
				285.085	21.586
				285.107	31.7441
				285.138	106.414
				285.245	12.7386
				285.257	52.6337
				285.31	31.9898
				285.342	105.8
				285.448	40.9191
				285.489	46.5307
				285.535	5.93922
				285.541	50.1352
				285.591	125.256
				285.717	87.7365
				285.804	199.517
				286.004	82.2069
				286.086	374.744
				286.461	396.821
				286.858	80.3228
				286.938	50.0942
				286.988	55.7467
				287.044	155.485
				287.199	93.8396
				287.293	48.1281
				287.341	324.814
				287.666	24.6989
				287.691	114.361
				287.805	253.461
				288.059	54.5179
				288.113	35.963
				288.149	10.3219
				288.159	151.839
				288.311	106.578
				288.418	37.4375
				288.455	345.867
				288.801	117.146
				288.918	208.405
				289.127	134.882
				289.262	122.553
				289.384	96.7068
				289.481	28.9178
				289.51	57.8766
				289.568	51.9784
				289.62	39.3217
				289.659	83.8863
				289.743	228.475
				289.971	334.644
				290.306	62.7099
				290.369	142.746
				290.511	119.89
				290.631	58.6549
				290.69	126.034
				290.816	131.81
				290.948	49.275
				290.997	17.8996
				291.015	28.8359
				291.044	21.9137
				291.066	12.2471
				291.078	44.9742
				291.123	47.1451
				291.17	24.2893
				291.194	25.9277
				291.22	13.7216
				291.234	12.4109
				291.246	26.2145
				291.273	39.035
				291.312	25.0266
				291.337	27.771
				291.365	55.8696
				291.42	137.995
				291.558	251.413
				291.81	123.003
				291.933	38.6663
				291.971	11.9604
				291.983	18.5959
				292.002	30.6791
				292.033	28.0986
				292.061	50.6267
				292.111	115.016
				292.226	43.7864
				292.27	63.8568
				292.334	68.9768
				292.403	46.4078
				292.449	164.086
				292.614	193.536
				292.807	252.15
				293.059	48.4558
				293.108	26.2554
				293.134	15.401
				293.149	48.0052
				293.197	27.5252
				293.225	106.128
				293.331	108.913
				293.44	47.3499
				293.487	196.158
				293.683	61.2763
				293.745	15.6058
				293.76	18.7597
				293.779	109.445
				293.889	207.873
				294.096	60.0475
				294.156	65.1675
				294.222	131.113
				294.353	260.506
				294.613	23.593
				294.637	21.1764
				294.658	32.2766
				294.69	51.9784
				294.742	125.707
				294.868	44.6875
				294.913	52.1832
				294.965	28.754
				294.994	65.1266
				295.059	35.7582
				295.094	37.6423
				295.132	32.4814
				295.165	7.94626
				295.173	82.5346
				295.255	228.557
				295.484	171.295
				295.655	416.073
				296.071	118.006
				296.189	60.0475
				296.249	32.5633
				296.282	162.898
				296.444	122.02
				296.567	21.7498
				296.588	45.3838
				296.634	42.5985
				296.676	81.2239
				296.757	98.1814
				296.856	32.891
				296.889	73.3595
				296.962	43.0081
				297.005	150.037
				297.155	43.9912
				297.199	25.6001
				297.225	41.3697
				297.266	77.7832
				297.344	37.3556
				297.381	40.6734
				297.422	196.69
				297.618	68.813
				297.687	120.914
				297.808	48.4148
				297.857	30.3924
				297.887	359.794
				298.247	46.7355
				298.293	106.783
				298.4	470.877
				298.871	376.096
				299.247	137.462
				299.385	84.3369
				299.469	704.678
				300.174	94.9865
				300.269	47.7185
				300.316	130.458
				300.447	82.9033
				300.53	105.882
				300.636	207.053
				300.843	71.1887
				300.914	75.5304
				300.989	63.7749
				301.053	68.5263
				301.122	40.5505
				301.162	132.752
				301.295	154.502
				301.45	214.672
				301.664	146.719
				301.811	128.533
				301.939	56.6888
				301.996	73.4005
				302.07	40.8782
				302.11	44.6875
				302.155	27.2794
				302.182	394.651
				302.577	134.39
				302.711	58.7368
				302.77	159.54
				302.93	49.4798
				302.979	145.163
				303.124	82.0841
				303.206	66.1096
				303.273	170.927
				303.443	95.437
				303.539	28.6311
				303.568	29.4094
				303.597	33.0958
				303.63	372.532
				304.003	114.852
				304.117	68.5672
				304.186	86.262
				304.272	75.1618
				304.347	57.0165
				304.404	7.45474
				304.412	62.8738
				304.475	498.075
				304.973	106.578
				305.079	81.7154
				305.161	103.506
				305.265	116.9
				305.382	54.5998
				305.436	53.5758
				305.49	20.7258
				305.51	14.9504
				305.525	39.4446
				305.565	20.562
				305.585	19.7428
[truncated: 1,618 more rows]

## Sheet: Fig 3L 3M
Figure 3M - Firing Rate Distribution by Burst Rate - Rep Unit								Figure 3M - Firing Rate Distribution by Burst Rate - Pooled Units
Firing Rate (spikes/s)								Firing Rate (spikes/s)
0	0.1	0.2	0.3	0.4	0.5	>=0.6		0	0.1	0.2	0.3	0.4	0.5	>=0.6
3.3	6.7	1.9	4.5	4.9	5.8	3.9		1.4	2	1.9	2.2	2.4	3.2	2.4
7.3	11.6	2.6	3.7	5	4.2	7.2		2.7	4.3	1.8	2	2.1	3	4.3
8.1	7	6	4.6	2.6	3.7	5.5		6.6	2.1	3	2.1	2.8	3.2	4.6
7	6	5.5	4.5	4.6	5.1	4.4		4.7	1.2	1.4	2.7	2.4	5.1	4
12.6	4.2	5.3		4.3	6.8	5.2		5.1	1.5	1.5	4.6	3.4	4	4
10.8	7.1	5.5		5.8	5.8	4.3		3.8	1.7	1.6	2.5	3.2	2.9	4.2
12.6	4.6	3.5				4.3		3.2	2.2	1.9	5.4	3.6	4.3	5.3
11	3.8	5.4				4.9		3.9	2	3.7	3.4	3.7	3	4.5
11.6						4.2		2.3	8.7	2.9	5.3	4.5	3.3	4.2
11						6.4		2.8	7.1	3.4	3.4	3	3.1	4.1
10.7								1.5	6.5	6.3	4.4	3	3.4	4.4
7.4								0.5	2.4	3.5	2.5	3.2	2.3	5.1
4.2								2.8	6.1	5.3	3.6	4	2.3	3.6
4								0.7	4.2	3.3	3.5	2.6	7.5	3.8
6.5								2.3	4.1	4.7	3.4	3.1	5.8	2.6
7.1								2.5	5.8	3.5	3.2	4.5	7.5	3.8
6.8								2.2	2.9	2.9	3.3	4.8	6	4.4
6.7								1.8	2.4	3	4.2	6.3	3.7	6.3
								1.8	6.7	2	2.9	4.6	3.4	5.1
								1.4	6.6	5.2	3.1	7.8	3.8	4
								1.1	4.2	4.5	4.7	5.2	2	6.9
								2.1	3.7	4.1	3.9	2.9	5.8	7.2
								3.3	3	3.1	3.3	2.2	4.2	4.7
								4.8	2.7	4.1	3.8	2.7	3.7	5.7
								5.4	4.7	2.8	3.6	3.2	5.1	6.3
								5	2.2	2.5	3.6	4	6.8	3.5
								4.9	4.4	2.9	2.6	2.9	5.8	3.5
								4.9	1.9	4.7	2.8	3	3.4	3.8
								2.6	6.3	2.7	2.8	3.2	4.8	5.6
								2.7	4	4	4.3	4.8	2.5	3.8
								2.9	2.4	4.2	3.4	3	2	5.1
								3.7	2.8	5.1	5.6	3.5	2.5	7
								5.1	5.9	4	4.3	2.3	2.4	6.1
								6	1.8	2.7	3.8	2.8	1.8	7
								5.1	2.2	1.8	2	2.8	1.6	4.6
								4	2.2	2.4	2.9	2.9	1.3	3.5
								4.4	3.4	3.1	2.4	4.9	1.5	4.5
								4.8	2.2	2.9	1.6	5	2	5.3
								4.7	2.5	3.7	2	2.6	1.7	3.3
								4.8	9.8	3.1	5	4.6	2	3.6
								2.3	2.3	3.7	2.9	4.3	2.2	2.8
								3	2.4	3.4	4.5	5.8	3	3.6
								4.3	1.8	2.5	3.7	4	3.2	3.2
								4	2.4	1	4.6	5.4	4.2	4.1
								5.3	4.3	2	4.5	7.4	3	4.5
								4.4	4.5	1.6	3.6	3	2.6	4.6
								4.2	3.6	3.1	3	1.1	1.7	4.1
								5.3	2.3	2.7	4.1	1.5	4	2.8
								2.7	3.9	2.1	3.1	1.4	2	3.1
								3.6	3.3	5.6	4	1.7	2.2	3
								1.8	3.1	1.8	2.8	1.2	1.7	3.9
								3.2	2.9	3.5	3	1	3.1	7.2
								2.1	2.7	3.9	4.5	1.6		5.5
								2.5	2.4	2.7	5	1.5		4.4
								2.8	2.9	1.7	4.6	1.4		5.2
								2.5	2.4	2.9	3.8	2.6		4.3
								3.7	2.4	1.8	3.3	2		4.3
								3.2	2.1	1.7	4	1.6		4.9
								5.2	2.3	1.5	1.7	1.7		4.2
								5	1.6	1.9	1.9	1.5		6.4
								3.9	1.8	1.9	1.9	5.1		2.3
								3.9	2.9	2.6	2	2.1		2.5
								3.5	3.3	6	1.6	2.1		3
								2.9	2.3	5.5	1	4.3		3.5
								3.6	2	5.3	0.9	2.1		3.2
								2.8	0.6	5.5	1.4			3.4
								2.7	1.6	3.5	1			2.5
								3.6	1.3	5.4	1.6			4.9
								1.1	2.5	2.2	0.9			2.9
								0.7	2.9	3	1.6			3.7
								2	2.3	2.2	1.9			3.3
								1.5	2.6	3.5	1.2			3.2
								1.1	4	4.2	0.8			4.5
								2.6	2.7	0.8	1.1			2.6
								4.9	3.9	4.9	1.7			3
								3.5	4.2	5.1	3.8			3.5
								6.1	2.1	5.2	1.4			3.1
								1.9	2.4	4.1	1.2			4
								2.5	2.1	1.3	2.7			3.6
								2	0.6	1	6.4			3.2
								2.2	2.2	1	1.4			2.7
								17.7	1.1	0.6	2.9			2.7
								7.9	1	1.1	1.4			3.5
								8.6	0.8	1.3				3.7
								4.8	2	1.8				2.8
								3.7	0.9	1.5				3.3
								8.5	1.1	2.6				3.3
								6.7	1.1	3.3				2.4
								7	0.8	1.2				3.3
								2.7	1					4.7
								1.9	0.9					3.3
								2.3	1					3.9
								1.6	1.4					3
								1.5	0.6					3.5
								1.3	6.7					3.3
								4.5	11.6					3.2
								2.7	7					4.6
								21	6					4.1
								8.9	4.2					3.8
								13.8	7.1					4.9
								8.8	4.6					2
								10.7	3.8					2
								8.9	2.9					2.6
								8.7	2.4					1.9
								6	2.2					1.9
								9.4	2.4					2.4
								2.1	2.8					2.1
								7.1	3.8					2.1
								3.4	3.2					2.5
								2.6	2.9					2.7
								4.1	2.5					1.9
								1.3	1.6					2.3
								1.3	5.5					2.3
								11.9	0.3					2.1
								11.4	0.6					3
								5.5	3.1					2.5
								11.3	2.9					2.1
								4.8	3.2					2.4
								5.1	0.4					2.2
								2.6	5.3					2.9
								5	1.4					2.3
								5.2	1.3					2.5
								5.3	0.5
								6.2	2.1
								2	1.2
								3.7	1.4
								4.2	4
								1.7	6.8
								3.7	5.7
								3.5	1.5
								3.9	4.8
								3
								4
								2.8
								4.8
								2.3
								2.1
								2.2
								1.5
								1.6
								2
								2.1
								3.3
								3.4
								2
								2.7
								1.8
								1.7
								1.3
								2.3
								2.2
								2.2
								2.3
								2.3
								1.5
								1.8
								2
								2.9
								2.3
								2
								2.3
								1.1
								1.7
								1.6
								2.1
								2.6
								3
								2.6
								2.8
								1.9
								1.8
								1.7
								1.4
								0.8
								2.3
								0.8
								0.1
								0.3
								0.1
								0.3
								0
								0.1
								0.1
								0.1
								0.2
								0.3
								0.4
								0.3
								0.6
								0.5
								1.2
								0.6
								0.2
								0.1
								0
								0.7
								1.2
								0.2
								0.2
								0.1
								0.1
								0.6
								0.1
								0.3
								0.1
								0.3
								1.4
								0.5
								0.8
								0.9
								0.4
								0.8
								1.4
								1.4
								1.5
								0.9
								1.8
								1
								0.6
								0.4
								2.1
								1.4
								1.5
								0.5
								0.6
								0.2
								0.6
								0.2
								0.6
								0.8
								0.9
								1.5
								0.2
								1.8
								1.5
								2
								2.7
								1
								2.6
								2.4
								3.7
								2.1
								3.6
								3.4
								1.7
								2.3
								1.6
								2
								2.6
								1.8
								1.2
								1.5
								0.8
								1.2
								1.2
								0.9
								1
								0.6
								0.7
								1.1
								1
								1.2
								1.2
								0.8
								0.9
								1.1
								0.9
								0.5
								0.8
								0.4
								0.8
								1
								0.7
								0.8
								0.9
								1.5
								1.6
								1.6
								1.9
								2.5
								2
								1.5
								1.5
								1.4
								1.1
								0.9
								1.6
								1.2
								0.9
								1.2
								1
								1.3
								0.9
								0.5
								1.1
								1.4
								1.3
								0.7
								1
								0.9
								1.8
								0.8
								0.9
								0.6
								0.6
								2
								0.5
								1
								1.5
								1.6
								1.2
								0.6
								1.2
								1.2
								4.2
								3.1
								2.7
								0.5
								0.1
								0
								0.3
								0
								0.2
								0.1
								0.4
								0.9
								0.6
								0.7
								0.3
								0.1
								0.2
								0.4
								1
								0.7
								1
								1.7
								4.7
								4.3
								4.9
								4.6
								0.9
								0.6
								0.4
								0
								0.2
								0.1
								0.6
								2
								0.7
								0.4
								0.5
								0.5
								0.8
								0.2
								0.6
								3.3
								7.3
								8.1
								7
								12.6
								10.8
								12.6
								11
								11.6
								11
								10.7
								7.4
								4.2
								4
								6.5
								7.1
								6.8
								6.7
								2.3
								1.8
								3.7
								2.8
								2.7
								2.7
								2.9
								1.8
								2.2
								2.1
								4.1
								3.3
								4
								3.7
								5
								3.4
								4.8
								2.6
								0.5
								0.5
								2.5
								1.8
								2.6
								2
								1.5
								2.3
								2
								1.6
								0.8
								0.9
								3.4
								2.5
								1
								0.7
								1.9
								0.8
								1.3
								0.9
								0.7
								0
								0
								0
								0
								0
								0
								0
								0
								0
								0
								0.2
								0.9
								1.1
								2.3
								3.7
								4
								4.4
								5.6
								6.2
								5.7
								4.1
								3.6
								1.1
								1.5
								1.6
								2
								0.7
								0.6
								1.9
								1.6
								3.5
								1.8
								1.8
								3
								2.9
								2.6
								2.5
								1.8
								2
								4.2
								4.1
								4.5
								6.1
								6
								6.2
								6.5
								4.5
								4.5
								3.7
								3.8
								2
								0
								0.2
								0.2
								0.1
								0.1
								0.2
								0.3
								0.2
								0.2
								0.2
								0.1
								0.1
								0.3
								0.1
								0.3
								0.4
								0
								0
								0
								0.1
								0.1
								0.2
								0.7
								0.3
								0
								0.3
								0.3
								0.3
								0.2
								0.2
								0.1
								0
								0.3
								0.1
								0
								0.7
								0.2
								0.2
								0.1
								0.5
								0.1
								0.1
								0.5
								0.4
								0
								0.1
								0.4
								0.5
								0.2
								0.1
								0.1
								0.2
								0.1
								0.1
								0.2
								0
								0.2
								0
								0.2
								0.3
								0.2
								0.7
								0.2
								0.4
								0.3
								0.3
								7.8
								4.7
								5.9
								6.3
								3.8
								5.5
