# Supplementary material for: State-dependent activity dynamics of hypothalamic stress effector neurons
Source: eLife. 2022 Jun 30;11:e76832. doi: 10.7554/eLife.76832 (PMC9278954; doi:10.7554/eLife.76832)
Supplement: Figure 4—source data 1. [file elife-76832-fig4-data1.xlsx]

## Sheet: Fig 4A
Figure 4A - Pre vs Post ISI Representative
Pre ISI (ms)	Post ISI (ms)
1025.35	48.7835
48.7835	193.782
193.782	1071.56
1071.56	1832.8
1832.8	203.203
203.203	798.845
798.845	502.621
502.621	93.2252
93.2252	1450.19
1450.19	459.859
459.859	200.336
200.336	131.277
131.277	1824.53
1824.53	1285.66
1285.66	3.56353
3.56353	3.93217
3.93217	190.956
190.956	877.816
877.816	654.583
654.583	55.419
55.419	116.818
116.818	206.48
206.48	888.384
888.384	3.60449
3.60449	3.48161
3.48161	13.8445
13.8445	2442.12
2442.12	6.96322
6.96322	33.5054
33.5054	37.6833
37.6833	272.794
272.794	3237.4
3237.4	854.018
854.018	6.63554
6.63554	9.37986
9.37986	18.473
18.473	85.7295
85.7295	1228.19
1228.19	4.17793
4.17793	4.46465
4.46465	37.4785
37.4785	1176.42
1176.42	186.409
186.409	132.506
132.506	1418.08
1418.08	13.7216
13.7216	113.132
113.132	814.287
814.287	38.6663
38.6663	46.4078
46.4078	2557.55
2557.55	857.049
857.049	296.183
296.183	1213.73
1213.73	207.422
207.422	126.485
126.485	126.69
126.69	780.741
780.741	589.334
589.334	2271.81
2271.81	3.72737
3.72737	3.35873
3.35873	427.173
427.173	2836.04
2836.04	7.45474
7.45474	471.287
471.287	5.16097
5.16097	5.48865
5.48865	40.3457
40.3457	857.336
857.336	126.116
126.116	2179
2179	7.41378
7.41378	1004.01
1004.01	77.6604
77.6604	3200.83
3200.83	121.733
121.733	576.309
576.309	218.932
218.932	97.6079
97.6079	247.071
247.071	153.928
153.928	60.1294
60.1294	50.1352
50.1352	86.5077
86.5077	17.2852
17.2852	27.2794
27.2794	60.6619
60.6619	76.2268
76.2268	61.0306
61.0306	53.7806
53.7806	186.123
186.123	104.489
104.489	288.646
288.646	75.4076
75.4076	129.557
129.557	850.291
850.291	239.248
239.248	77.7832
77.7832	241.91
241.91	77.005
77.005	98.6319
98.6319	190.505
190.505	132.055
132.055	181.371
181.371	146.719
146.719	188.949
188.949	288.236
288.236	173.343
173.343	114.033
114.033	106.087
106.087	155.566
155.566	34.4474
34.4474	88.3919
88.3919	82.4937
82.4937	100.475
100.475	123.085
123.085	118.334
118.334	75.0389
75.0389	311.87
311.87	73.8511
73.8511	98.0995
98.0995	176.292
176.292	125.543
125.543	308.389
308.389	107.397
107.397	133.202
133.202	71.2706
71.2706	70.6971
70.6971	19.3741
19.3741	30.9658
30.9658	32.3994
32.3994	69.5503
69.5503	75.6533
75.6533	33.4644
33.4644	67.4613
67.4613	121.201
121.201	47.4318
47.4318	100.229
100.229	172.975
172.975	173.548
173.548	96.7478
96.7478	349.103
349.103	213.73
213.73	161.833
161.833	388.589
388.589	134.554
134.554	65.741
65.741	160.973
160.973	173.384
173.384	99.574
99.574	142.295
142.295	118.293
118.293	115.016
115.016	46.3259
46.3259	509.257
509.257	221.676
221.676	132.875
132.875	211.395
211.395	70.7791
70.7791	239.084
239.084	152.413
152.413	214.959
214.959	138.937
138.937	81.5516
81.5516	31.826
31.826	844.106
844.106	91.8735
91.8735	183.583
183.583	208.282
208.282	134.103
134.103	259.851
259.851	143.483
143.483	159.171
159.171	253.502
253.502	134.595
134.595	1228.23
1228.23	277.423
277.423	300.647
300.647	102.155
102.155	179.897
179.897	57.0165
57.0165	130.908
130.908	117.064
117.064	208.241
208.241	161.547
161.547	166.871
166.871	95.5599
95.5599	83.9273
83.9273	280.085
280.085	117.76
117.76	39.3627
39.3627	181.986
181.986	305.03
305.03	310.6
310.6	207.504
207.504	90.4809
90.4809	138.077
138.077	104.653
104.653	132.301
132.301	61.3173
61.3173	286.147
286.147	406.201
406.201	84.5826
84.5826	96.8706
96.8706	203.736
203.736	163.103
163.103	305.603
305.603	399.361
399.361	340.583
340.583	514.582
514.582	737.651
737.651	536.987
536.987	107.315
107.315	126.976
126.976	44.155
44.155	30.3105
30.3105	104.325
104.325	93.5529
93.5529	134.882
134.882	54.1902
54.1902	372.901
372.901	892.48
892.48	230.892
230.892	80.1999
80.1999	451.913
451.913	188.826
188.826	385.885
385.885	69.3045
69.3045	117.146
117.146	95.8876
95.8876	718.358
718.358	219.382
219.382	142.664
142.664	251.946
251.946	169.984
169.984	90.8495
90.8495	68.0757
68.0757	37.6014
37.6014	62.9557
62.9557	30.802
30.802	44.9742
44.9742	85.2789
85.2789	56.6478
56.6478	255.059
255.059	59.0645
59.0645	313.836
313.836	126.526
126.526	78.3157
78.3157	142.828
142.828	49.8484
49.8484	96.2972
96.2972	96.9116
96.9116	138.978
138.978	408.045
408.045	121.652
121.652	108.749
108.749	88.4329
88.4329	87.5727
87.5727	137.626
137.626	330.876
330.876	104.899
104.899	138.732
138.732	157.819
157.819	129.925
129.925	510.199
510.199	77.5375
77.5375	163.922
163.922	63.3243
63.3243	46.9812
46.9812	89.1701
89.1701	160.768
160.768	73.7282
73.7282	1137.5
1137.5	185.017
185.017	466.003
466.003	106.906
106.906	145.408
145.408	161.71
161.71	116.245
116.245	233.964
233.964	371.099
371.099	168.838
168.838	137.749
137.749	118.211
118.211	583.354
583.354	132.793
132.793	31.5393
31.5393	851.724
851.724	368.068
368.068	162.161
162.161	97.7718
97.7718	346.236
346.236	76.1039
76.1039	47.3499
47.3499	219.546
219.546	506.472
506.472	1282.34
1282.34	218.235
218.235	123.208
123.208	203.94
203.94	950.971
950.971	173.671
173.671	209.961
209.961	3055.3
3055.3	173.548
173.548	418.448
418.448	294.462
294.462	158.679
158.679	107.643
107.643	272.467
272.467	58.4501
58.4501	150.61
150.61	159.171
159.171	46.5307
46.5307	148.03
148.03	90.0303
90.0303	270.582
270.582	247.686
247.686	144.139
144.139	104.817
104.817	72.4584
72.4584	278.856
278.856	418.039
418.039	347.137
347.137	330.548
330.548	219.71
219.71	199.271
199.271	51.9374
51.9374	445.646
445.646	188.416
188.416	223.192
223.192	121.692
121.692	247.194
247.194	523.347
523.347	100.27
100.27	178.504
178.504	275.17
275.17	184.771
184.771	441.058
441.058	257.352
257.352	67.8299
67.8299	185.549
185.549	342.713
342.713	168.633
168.633	393.135
393.135	311.215
311.215	145.777
145.777	137.544
137.544	1758.5
1758.5	132.506
132.506	165.52
165.52	523.265
523.265	159.007
159.007	241.787
241.787	158.434
158.434	237.569
237.569	239.535
239.535	308.512
308.512	252.847
252.847	93.43
93.43	139.551
139.551	80.7324
80.7324	129.762
129.762	181.822
181.822	178.463
178.463	191.775
191.775	183.706
183.706	120.914
120.914	418.53
418.53	272.589
272.589	297.78
297.78	341.853
341.853	860.531
860.531	644.507
644.507	109.773
109.773	307.447
307.447	462.276
462.276	117.433
117.433	157.942
157.942	120.3
120.3	83.3129
83.3129	149.218
149.218	489.105
489.105	135.496
135.496	249.939
249.939	142.623
142.623	251.741
251.741	222.413
222.413	1119.4
1119.4	519.661
519.661	1677.64
1677.64	924.306
924.306	30.7201
30.7201	91.1362
91.1362	151.921
151.921	139.141
139.141	163.513
163.513	355.452
355.452	111.248
111.248	78.9301
78.9301	52.4289
52.4289	176.661
176.661	459.409
459.409	511.182
511.182	462.522
462.522	167.24
167.24	4.71041
4.71041	1764.19
1764.19	6.22594
6.22594	7.7005
7.7005	452.486
452.486	230.237
230.237	586.467
586.467	125.256
125.256	228.639
228.639	69.9189
69.9189	82.9033
82.9033	263.947
263.947	140.452
140.452	347.178
347.178	102.318
102.318	259.81
259.81	163.431
163.431	278.447
278.447	72.7042
72.7042	233.186
233.186	164.578
164.578	125.215
125.215	139.264
139.264	109.2
109.2	32.85
32.85	154.788
154.788	140.043
140.043	289.055
289.055	710.535
710.535	219.71
219.71	119.071
119.071	61.9726
61.9726	352.503
352.503	101.54
101.54	128
128	147.415
147.415	335.013
335.013	96.2153
96.2153	117.965
117.965	69.3045
69.3045	199.23
199.23	392.111
392.111	361.842
361.842	75.8172
75.8172	219.423
219.423	218.358
218.358	103.506
103.506	140.821
140.821	198.083
198.083	664.701
664.701	184.976
184.976	349.308
349.308	147.006
147.006	272.958
272.958	1193.37
1193.37	2046.28
2046.28	1422.71
1422.71	610.674
610.674	217.785
217.785	67.6251
67.6251	1735.97
1735.97	972.966
972.966	2257.15
2257.15	132.629
132.629	217.334
217.334	114.156
114.156	213.32
213.32	453.551
453.551	362.456
362.456	99.1644
99.1644	883.55
883.55	1458.92
1458.92	3.68641
3.68641	3.60449
3.60449	5.69345
5.69345	162.161
162.161	1680.14
1680.14	4.46465
4.46465	491.48
491.48	5.73441
5.73441	2699.07
2699.07	5.77537
5.77537	477.431
477.431	4.21889
4.21889	4.34177
4.34177	17.3671
17.3671	230.319
230.319	313.918
313.918	1308.68
1308.68	792.619
792.619	321.209
321.209	22.8148
22.8148	1420.82
1420.82	3.89121
3.89121	3.56353
3.56353	674.244
674.244	1045.55
1045.55	1847.34
1847.34	291.554
291.554	545.261
545.261	5791.96
5791.96	533.014
533.014	1993.86
1993.86	158.229
158.229	194.356
194.356	92.0783
92.0783	122.839
122.839	762.595
762.595	456.828
456.828	188.294
188.294	1381.17
1381.17	539.936
539.936	230.155
230.155	157.574
157.574	49.234
49.234	75.8991
75.8991	163.267
163.267	255.591
255.591	59.2283
59.2283	59.9656
59.9656	266.978
266.978	266.568
266.568	52.9205
52.9205	51.364
51.364	598.591
598.591	80.9781
80.9781	809.536
809.536	185.017
185.017	1446.75
1446.75	165.602
165.602	98.0175
98.0175	195.257
195.257	141.517
141.517	173.753
173.753	789.998
789.998	192.021
192.021	464.774
464.774	724.748
724.748	202.261
202.261	207.463
207.463	663.881
663.881	717.375
717.375	5.73441
5.73441	5.69345
5.69345	43.7454
43.7454	22.2413
22.2413	96.8706
96.8706	134.882
134.882	211.682
211.682	322.028
322.028	644.343
644.343	8.02818
8.02818	63.3653
63.3653	63.9387
63.9387	146.883
146.883	157.492
157.492	1599
1599	3.68641
3.68641	575.121
575.121	3.60449
3.60449	3.48161
3.48161	4.38273
4.38273	6.14402
6.14402	8.02818
8.02818	19.6199
19.6199	346.891
346.891	2190.46
2190.46	41.3697
41.3697	71.4754
71.4754	68.6901
68.6901	438.396
438.396	414.189
414.189	309.454
309.454	3670.03
3670.03	708.815
708.815	16.6298
16.6298	1280.74
1280.74	10.24
10.24	25.641
25.641	3139.59
3139.59	109.404
109.404	178.955
178.955	1087.9
1087.9	3.85025
3.85025	3.52257
3.52257	4.83329
4.83329	246.088
246.088	1472.93
1472.93	3.48161
3.48161	3.31777
3.31777	4.09601
4.09601	5.20193
5.20193	106.496
106.496	86.7125
86.7125	876.464
876.464	3.39969
3.39969	3.60449
3.60449	2128.61
2128.61	3.31777
3.31777	3.27681
3.27681	4.17793
4.17793	124.109
124.109	490.047
490.047	587.655
587.655	5.03809
5.03809	5.69345
5.69345	96.5839
96.5839	851.151
851.151	4.58753
4.58753	4.58753
4.58753	891.333
891.333	5.48865
5.48865	37.7243
37.7243	21.1354
21.1354	445.523
445.523	874.048
874.048	850.578
850.578	691.448
691.448	24.7809
24.7809	384.574
384.574	262.554
262.554	244.122
244.122	2441.22
2441.22	1025.56
1025.56	6.2669
6.2669	404.276
404.276	960.76
960.76	1619.69
1619.69	780.577
780.577	1200.87
1200.87	6.2669
6.2669	1462.64
1462.64	3.80929
3.80929	3.56353
3.56353	1076.02
1076.02	3.68641
3.68641	3.72737
3.72737	1535.23
1535.23	3.39969
3.39969	3.23585
3.23585	643.442
643.442	4.01409
4.01409	3.64545
3.64545	4.30081
4.30081	6.84034
6.84034	8.43778
8.43778	649.627
649.627	5.44769
5.44769	6.10306
6.10306	882.076
882.076	3.27681
3.27681	3.03105
3.03105	3.93217
3.93217	5.03809
5.03809	887.851
887.851	3.68641
3.68641	3.80929
3.80929	4.95617
4.95617	33.3415
33.3415	904.112
904.112	414.189
414.189	1417.14
1417.14	246.047
246.047	962.972
962.972	4.30081
4.30081	4.09601
4.09601	11.3869
11.3869	82.3708
82.3708	959.613
959.613	54.395
54.395	522.815
522.815	367.371
367.371	418.448
418.448	1290.82
1290.82	2104.61
2104.61	4.13697
4.13697	3.68641
3.68641	4.95617
4.95617	53.9035
53.9035	625.297
625.297	5.98018
5.98018	1259.15
1259.15	8.3149
8.3149	265.626
265.626	627.263
627.263	1617.19
1617.19	1486.89
1486.89	2103.63
2103.63	898.992
898.992	729.459
729.459	4.42369
4.42369	53.9035
53.9035	80.5685
80.5685	2350.7
2350.7	6.38978
6.38978	6.75842
6.75842	596.379
596.379	6.8813
6.8813	10.8544
10.8544	3118.99
3118.99	2270.66
2270.66	4.54657
4.54657	4.95617
4.95617	123.044
123.044	2044.24
2044.24	642.705
642.705	2089.54
2089.54	362.988
362.988	95.437
95.437	2214.96
2214.96	3018.68
3018.68	956.746
956.746	303.064
303.064	1049.28
1049.28	755.837
755.837	5.40673
5.40673	257.885
257.885	199.271
199.271	1143.28
1143.28	1501.27
1501.27	1282.22
1282.22	460.76
460.76	2823.99
2823.99	1173.34
1173.34	238.347
238.347	81.7154
81.7154	130.868
130.868	2463.26
2463.26	88.3509
88.3509	159.785
159.785	702.834
702.834	71.5983
71.5983	171.951
171.951	252.109
252.109	108.462
108.462	287.007
287.007	133.038
133.038	97.1574
97.1574	419.718
419.718	110.469
110.469	354.182
354.182	78.07
78.07	908.413
908.413	282.092
282.092	311.133
311.133	1162
1162	154.051
154.051	288.441
288.441	246.703
246.703	616.327
616.327	101.049
101.049	98.2223
98.2223	18.9645
18.9645	548.333
548.333	275.989
275.989	620.505
620.505	322.602
322.602	242.893
242.893	165.847
165.847	155.075
155.075	249.037
249.037	683.419
683.419	143.934
143.934	82.3708
82.3708	130.949
130.949	140.043
140.043	2211.72
2211.72	504.055
504.055	96.3791
96.3791	123.208
123.208	1608.09
1608.09	1100.76
1100.76	29.5322
29.5322	152.331
152.331	144.057
144.057	171.705
171.705	965.839
965.839	115.344
115.344	379.372
379.372	430.368
430.368	181.904
181.904	97.7308
97.7308	641.108
641.108	207.586
207.586	1379.25
1379.25	207.34
207.34	270.869
270.869	127.673
127.673	112.231
112.231	282.133
282.133	303.228
303.228	137.544
137.544	3428.4
3428.4	2414.23
2414.23	189.522
189.522	1237.24
1237.24	184.239
184.239	161.629
161.629	398.951
398.951	134.964
134.964	348.243
348.243	179.119
179.119	198.247
198.247	140.903
140.903	153.314
153.314	122.594
122.594	131.892
131.892	256.205
256.205	273.532
273.532	987.057
987.057	1473.7
1473.7	3913.74
3913.74	881.666
881.666	10.8544
10.8544	208.036
208.036	509.421
509.421	583.641
583.641	5.93922
5.93922	29.8599
29.8599	38.6254
38.6254	56.2792
56.2792	2647.58
2647.58	4.13697
4.13697	3.97313
3.97313	6.14402
6.14402	188.253
188.253	2486.16
2486.16	231.793
231.793	132.506
132.506	170.722
170.722	151.921
151.921	1366.84
1366.84	769.067
769.067	1103.3
1103.3	41.4926
41.4926	1126.53
1126.53	4.75137
4.75137	25.2724
25.2724	71.2706
71.2706	584.337
584.337	3.97313
3.97313	4.38273
4.38273	26.0097
26.0097	357.336
357.336	328.336
328.336	1706.64
1706.64	138.404
138.404	1592.69
1592.69	5.93922
5.93922	7.20898
7.20898	36.2087
36.2087	107.684
107.684	213.279
213.279	777.75
777.75	6.8813
6.8813	265.299
265.299	563.652
563.652	5.57057
5.57057	38.7073
38.7073	106.251
106.251	1469.36
1469.36	133.407
133.407	1567.95
1567.95	5.32481
5.32481	5.44769
5.44769	164.783
164.783	1964.49
1964.49	3.56353
3.56353	3.48161
3.48161	1336.94
1336.94	12.5748
12.5748	45.4248
45.4248	396.903
396.903	1087.25
1087.25	3.68641
3.68641	3.80929
3.80929	1544.65
1544.65	3.35873
3.35873	3.03105
3.03105	3.93217
3.93217	5.03809
5.03809	690.792
690.792	4.95617
4.95617	5.36577
5.36577	584.337
584.337	3.60449
3.60449	3.64545
3.64545	4.50561
4.50561	112.435
112.435	62.3003
62.3003	389.039
389.039	512.943
512.943	859.261
859.261	45.7934
45.7934	1729.25
1729.25	4.62849
4.62849	4.17793
4.17793	136.52
136.52	195.707
195.707	32.85
32.85	197.346
197.346	641.681
641.681	655.157
655.157	142.377
142.377	401.327
401.327	53.6168
53.6168	176.538
176.538	687.761
687.761	10.4039
10.4039	33.915
33.915	46.4488
46.4488	49.0702
49.0702	2695.54
2695.54	88.5148
88.5148	1096.99
1096.99	40.5505
40.5505	91.6687
91.6687	871.59
871.59	1422.26
1422.26	1469.57
1469.57	7.53666
7.53666	4.91521
4.91521	25.5181
25.5181	99.7788
99.7788	713.484
713.484	2937.13
2937.13	150.528
150.528	297.247
297.247	1979.03
1979.03	467.478
467.478	698.575
698.575	1258.95
1258.95	3.44065
3.44065	3.39969
3.39969	3056.2
3056.2	3.48161
3.48161	566.888
566.888	3.48161
3.48161	3.19489
3.19489	4.25985
4.25985	284.673
284.673	767.224
767.224	3.80929
3.80929	3.76833
3.76833	654.583
654.583	3.85025
3.85025	3.97313
3.97313	4.75137
4.75137	6.79938
6.79938	95.478
95.478	104.039
104.039	1432.58
1432.58	4.99713
4.99713	450.643
450.643	6.8813
6.8813	1000.04
1000.04	10.0762
10.0762	36.0449
36.0449	140.411
140.411	196.199
196.199	785.656
785.656	57.8357
57.8357	104.94
104.94	835.381
835.381	1104.65
1104.65	146.228
146.228	491.439
491.439	1516.96
1516.96	632.916
632.916	4.54657
4.54657	4.13697
4.13697	5.81633
5.81633	38.7483
38.7483	98.6729
98.6729	896.494
896.494	1554.97
1554.97	7.24994
7.24994	1782.17
1782.17	849.103
849.103	57.2622
57.2622	89.4569
89.4569	3424.14
3424.14	339.354
339.354	559.146
559.146	130.745
130.745	2440.61
2440.61	34.6522
34.6522	55.7057
55.7057	133.325
133.325	465.553
465.553	894.937
894.937	4.62849
4.62849	4.17793
4.17793	5.77537
5.77537	27.9348
27.9348	62.8738
62.8738	1149.3
1149.3	286.762
286.762	380.437
380.437	191.161
191.161	129.557
129.557	61.8498
61.8498	168.346
168.346	171.254
171.254	106.169
106.169	453.428
453.428	79.5445
79.5445	153.969
153.969	138.445
138.445	160.85
160.85	310.437
310.437	167.404
167.404	352.707
352.707	597.731
597.731	787.868
787.868	289.629
289.629	54.2721
54.2721	63.652
63.652	126.321
126.321	77.046
77.046	203.981
203.981	966.372
966.372	171.5
171.5	584.132
584.132	1479.56
1479.56	3.03105
3.03105	2.82625
2.82625	4.21889
4.21889	261.039
261.039	4.21889
4.21889	4.58753
4.58753	13.5168
13.5168	1568.2
1568.2	3.85025
3.85025	3.80929
3.80929	562.587
562.587	4.75137
4.75137	195.585
195.585	5.24289
5.24289	570.615
570.615	4.30081
4.30081	4.58753
4.58753	158.761
158.761	403.334
403.334	4.91521
4.91521	4.75137
4.75137	327.271
327.271	4.87425
4.87425	38.0929
38.0929	509.953
509.953	320.759
320.759	1574.67
1574.67	24.0026
24.0026	155.239
155.239	1300.52
1300.52	3.76833
3.76833	3.56353
3.56353	4.62849
4.62849	7.94626
7.94626	199.721
199.721	193.864
193.864	650.078
650.078	7.33186
7.33186	1092.57
1092.57	27.2794
27.2794	67.5432
67.5432	1115.75
1115.75	120.955
120.955	410.134
410.134	908.372
908.372	25.2314
25.2314	27.0337
27.0337	620.709
620.709	1414.64
1414.64	10.6087
10.6087	875.522
875.522	6.59458
6.59458	1020.03
1020.03	3.89121
3.89121	965.143
965.143	3.31777
3.31777	3.15393
3.15393	27.4433
27.4433	253.543
253.543	301.507
301.507	1811.5
1811.5	3.56353
3.56353	3.64545
3.64545	44.196
44.196	2528.59
2528.59	425.002
425.002	440.649
440.649	107.807
107.807	1340.79
1340.79	437.904
437.904	690.751
690.751	132.096
132.096	1652.74
1652.74	510.895
510.895	158.352
158.352	1436.63
1436.63	994.757
994.757	640.903
640.903	2267.31
2267.31	294.257
294.257	163.226
163.226	509.994
509.994	5.07905
5.07905	5.07905
5.07905	16.8756
16.8756	24.0436
24.0436	120.505
120.505	1102.44
1102.44	1339.97
1339.97	232.735
232.735	3945.65
3945.65	3.52257
3.52257	3.39969
3.39969	4.42369
4.42369	6.59458
6.59458	662.53
662.53	5.07905
5.07905	24.9447
24.9447	57.7537
57.7537	709.265
709.265	1142.34
1142.34	3.35873
3.35873	3.19489
3.19489	4.01409
4.01409	500.614
500.614	3.68641
3.68641	5.77537
5.77537	655.321
655.321	5.16097
5.16097	4.71041
4.71041	9.50274
9.50274	29.4913
29.4913	409.601
409.601	5.07905
5.07905	30.802
30.802	1422.05
1422.05	4.58753
4.58753	4.21889
4.21889	168.018
168.018	1001.23
1001.23	5.07905
5.07905	22.1594
22.1594	416.482
416.482	5.77537
5.77537	45.5476
45.5476	17.5719
17.5719	177.48
177.48	659.212
659.212	611.821
611.821	183.993
183.993	592.406
592.406	291.595
291.595	407.512
407.512	171.5
171.5	166.134
166.134	170.066
170.066	301.507
301.507	1293.07
1293.07	165.028
165.028	885.394
885.394	1506.47
1506.47	36.987
36.987	702.548
702.548	806.464
806.464	80.5685
80.5685	706.93
706.93	3599.82
3599.82	535.635
535.635	9.99427
9.99427	28.1806
28.1806	1264.15
1264.15	572.786
572.786	354.182
354.182	1429.67
1429.67	70.6971
70.6971	185.222
185.222	100.803
100.803	88.4329
88.4329	157.533
157.533	134.226
134.226	1193.66
1193.66	289.055
289.055	178.135
178.135	221.635
221.635	595.109
595.109	427.132
427.132	1863.89
1863.89	566.232
566.232	174.367
174.367	162.038
162.038	53.2891
53.2891	216.802
216.802	149.914
149.914	105.186
105.186	78.6844
78.6844	126.239
126.239	593.717
593.717	949.537
949.537	1758.79
1758.79	1007.95
1007.95	25.682
25.682	1013.84
1013.84	4.71041
4.71041	331.49
331.49	544.237
544.237	169.739
169.739	239.289
239.289	2001.02
2001.02	145.408
145.408	200.664
200.664	436.88
436.88	834.316
834.316	193.741
193.741	140.411
140.411	594.823
594.823	224.707
224.707	119.685
119.685	116.286
116.286	108.38
108.38	71.0248
71.0248	164.209
164.209	1575.53
1575.53	279.43
279.43	177.931
177.931	285
285	329.319
329.319	95.7238
95.7238	161.383
161.383	132.957
132.957	114.688
114.688	588.351
588.351	402.679
402.679	1133.57
1133.57	114.688
114.688	195.052
195.052	74.0559
74.0559	294.585
294.585	89.2521
89.2521	172.401
172.401	170.517
170.517	208.241
208.241	70.1647
70.1647	95.3551
95.3551	110.592
110.592	36.3726
36.3726	410.461
410.461	260.301
260.301	305.767
305.767	181.863
181.863	249.078
249.078	189.359
189.359	433.808
433.808	742.238
742.238	602.769
602.769	197.264
197.264	615.712
615.712	243.139
243.139	176.866
176.866	38.011
38.011	306.586
306.586	210.453
210.453	80.3228
80.3228	106.332
106.332	98.4681
98.4681	76.6364
76.6364	77.4556
77.4556	328.828
328.828	119.808
119.808	114.483
114.483	343.86
343.86	114.811
114.811	62.4642
62.4642	356.763
356.763	201.196
201.196	175.514
175.514	82.0841
82.0841	186.737
186.737	104.489
104.489	113.419
113.419	66.8059
66.8059	68.1576
68.1576	127.836
127.836	60.2933
60.2933	414.352
414.352	332.023
332.023	294.38
294.38	174.367
174.367	91.4639
91.4639	146.269
146.269	120.341
120.341	104.08
104.08	25.0676
25.0676	291.759
291.759	112.927
112.927	117.842
117.842	69.3045
69.3045	154.42
154.42	208.077
208.077	300.279
300.279	690.833
690.833	192.021
192.021	101.008
101.008	368.108
368.108	283.772
283.772	471.901
471.901	160.072
160.072	106.537
106.537	220.775
220.775	70.3285
70.3285	105.636
105.636	159.622
159.622	89.0063
89.0063	82.3708
82.3708	161.178
161.178	176.169
176.169	172.032
172.032	368.928
368.928	123.536
123.536	191.284
191.284	273.368
273.368	54.0673
54.0673	134.8
134.8	342.467
342.467	166.79
166.79	230.401
230.401	166.052
166.052	121.57
121.57	495.986
495.986	100.721
100.721	116.736
116.736	84.5007
84.5007	24.4532
24.4532	178.832
178.832	138.158
138.158	49.8484
49.8484	64.717
64.717	63.7749
63.7749	165.274
165.274	83.3129
83.3129	92.0783
92.0783	214.672
214.672	116.45
116.45	685.877
685.877	157
157	202.261
202.261	62.5461
62.5461	63.652
63.652	1050.71
1050.71	48.7835
48.7835	132.424
132.424	78.029
78.029	36.7822
36.7822	129.557
129.557	98.3862
98.3862	34.7751
34.7751	45.0971
45.0971	136.397
136.397	215.368
215.368	67.9528
67.9528	35.3895
35.3895	329.196
329.196	170.845
170.845	342.426
342.426	146.105
146.105	175.678
175.678	298.64
298.64	181.699
181.699	314.246
314.246	278.365
278.365	61.5221
61.5221	249.775
249.775	139.551
139.551	132.588
132.588	30.802
30.802	148.562
148.562	819.407
819.407	8.39682
8.39682	73.6053
73.6053	989.105
989.105	120.546
120.546	245.843
245.843	171.049
171.049	415.704
415.704	50.5448
50.5448	63.8568
63.8568	107.438
107.438	335.463
335.463	173.138
173.138	143.688
143.688	262.472
262.472	161.137
161.137	86.0981
86.0981	202.425
202.425	104.612
104.612	201.647
201.647	111.411
111.411	157.614
157.614	63.3653
63.3653	178.914
178.914	135.947
135.947	51.4459
51.4459	87.3269
87.3269	271.484
271.484	128.492
128.492	208.364
208.364	186.778
186.778	184.525
184.525	85.5657
85.5657	101.909
101.909	48.6606
48.6606	43.09
43.09	77.2508
77.2508	16.5479
16.5479	27.6481
27.6481	14.377
14.377	36.4545
36.4545	292.127
292.127	59.3102
59.3102	229.459
229.459	256.205
256.205	60.9486
60.9486	121.078
121.078	145.654
145.654	54.0264
54.0264	58.8187
58.8187	175.678
175.678	66.1096
66.1096	119.726
119.726	145.326
145.326	148.972
148.972	45.4657
45.4657	91.9964
91.9964	61.8088
61.8088	92.4879
92.4879	88.8425
88.8425	320.595
320.595	85.0332
85.0332	68.772
68.772	71.1477
71.1477	109.732
109.732	5.07905
5.07905	113.992
113.992	208.897
208.897	137.093
137.093	56.1153
56.1153	98.3862
98.3862	340.624
340.624	120.095
120.095	87.5727
87.5727	86.7535
86.7535	65.0446
65.0446	54.8456
54.8456	140.329
140.329	93.1023
93.1023	238.634
238.634	31.4983
31.4983	44.4417
44.4417	136.848
136.848	138.117
138.117	89.293
89.293	84.2549
84.2549	88.269
88.269	43.8683
43.8683	73.0728
73.0728	216.884
216.884	223.642
223.642	107.889
107.889	83.6405
83.6405	61.8498
61.8498	31.0478
31.0478	141.681
141.681	54.7227
54.7227	122.716
122.716	57.7947
57.7947	80.6095
80.6095	57.2213
57.2213	285.533
285.533	128.86
128.86	136.561
136.561	175.023
175.023	48.0052
48.0052	86.0572
86.0572	47.9643
47.9643	46.9403
46.9403	85.0741
85.0741	97.2802
97.2802	94.6588
94.6588	98.4271
98.4271	34.4474
34.4474	176.989
176.989	79.9951
79.9951	43.09
43.09	339.805
339.805	130.294
130.294	120.013
120.013	65.9048
65.9048	1364.75
1364.75	84.9513
84.9513	238.265
238.265	190.833
190.833	525.231
525.231	506.922
506.922	88.8425
88.8425	546.817
546.817	362.292
362.292	309.822
309.822	250.307
250.307	179.159
179.159	207.75
207.75	237.528
237.528	113.337
113.337	241.828
241.828	288.277
288.277	212.911
212.911	299.05
299.05	90.317
90.317	395.347
395.347	43.0081
43.0081	179.364
179.364	51.5278
51.5278	81.4287
81.4287	148.398
148.398	64.635
64.635	92.5698
92.5698	162.325
162.325	59.3512
59.3512	356.599
356.599	322.643
322.643	113.623
113.623	833.006
833.006	210.043
210.043	163.39
163.39	80.6914
80.6914	44.5236
44.5236	225.526
225.526	113.992
113.992	125.911
125.911	82.9852
82.9852	283.116
283.116	237.651
237.651	97.9766
97.9766	68.2805
68.2805	104.571
104.571	71.1477
71.1477	97.485
97.485	44.9742
44.9742	303.883
303.883	251.167
251.167	200.623
200.623	529.123
529.123	115.999
115.999	132.997
132.997	348.734
348.734	148.357
148.357	87.4908
87.4908	313.14
313.14	117.924
117.924	90.5628
90.5628	231.22
231.22	341.362
341.362	113.828
113.828	868.027
868.027	158.475
158.475	67.9938
67.9938	115.835
115.835	75.3666
75.3666	177.849
177.849	353.117
353.117	57.5899
57.5899	239.78
239.78	221.881
221.881	120.668
120.668	482.633
482.633	495.249
495.249	71.5163
71.5163	150.16
150.16	25.1495
25.1495	118.825
118.825	38.8302
38.8302	188.089
188.089	115.712
115.712	119.644
119.644	181.494
181.494	74.1787
74.1787	176.087
176.087	139.428
139.428	3513.15
3513.15	423.978
423.978	437.741
437.741	309.454
309.454	181.658
181.658	236.094
236.094	503.359
503.359	274.187
274.187	151.389
151.389	193.004
193.004	204.145
204.145	95.437
95.437	66.0277
66.0277	69.8779
69.8779	90.4399
90.4399	85.6885
85.6885	75.2028
75.2028	2117.43
2117.43	841.771
841.771	7.7005
7.7005	1264.97
1264.97	175.023
175.023	685.959
685.959	556.484
556.484	509.708
509.708	96.7478
96.7478	937.741
937.741	6.8813
6.8813	29.8599
29.8599	239.002
239.002	158.925
158.925	186.082
186.082	445.687
445.687	627.058
627.058	191.611
191.611	122.266
122.266	175.678
175.678	478.332
478.332	9.3389
9.3389	68.4034
68.4034	61.604
61.604	244.778
244.778	157.287
157.287	167.117
167.117	1755.51
1755.51	140.329
140.329	484.722
484.722	3.97313
3.97313	3.76833
3.76833	5.89826
5.89826	941.837
941.837	187.843
187.843	376.178
376.178	1087.98
1087.98	2694.23
2694.23	3.23585
3.23585	3.03105
3.03105	3.89121
3.89121	4.66945
4.66945	110.715
110.715	722.168
722.168	446.752
446.752	41.2059
41.2059	146.883
146.883	271.156
271.156	228.312
228.312	1587.61
1587.61	3.52257
3.52257	3.52257
3.52257	4.62849
4.62849	92.9794

## Sheet: Fig 4B 4C
Figure 4B - Probability Burst by Preceding Silence														Figure 4C - Probability Burst by Proceeding Silence
	Prob. next ISI is < 6 ms														Prob. previous ISI is < 6 ms
Preceding silence (ms)	Unit2	Unit3	Unit6	Unit8	Unit13	Unit20	Unit27	Unit33	Unit35	Unit36	Mean	SD		Proceeding silence (ms)	Unit2	Unit3	Unit6	Unit8	Unit13	Unit20	Unit27	Unit33	Unit35	Unit36	Mean	SD
10	0.413793	0.466125	0.305699	0.236994	0.110429	0.474531	0.422619	0.255507	0.30563	0.149718	0.314104	0.128491		10	0.453202	0.577236	0.417098	0.250482	0.140673	0.509383	0.501984	0.271659	0.372654	0.2	0.369437	0.146964
20	0	0	0	0.0162602	0.0484848	0.0340909	0.00561798	0.1	0	0	0.0204454	0.0327088		20	0.227273	0.329412	0.194805	0.0404858	0.109091	0.229885	0.129213	0.111111	0.384615	0.191489	0.194738	0.104834
30	0	0	0	0.00917431	0.0277778	0	0	0.0645161	0.166667	0.016129	0.0284264	0.0526787		30	0.285714	0.142857	0.0657895	0.0229358	0.0694444	0.106383	0.045	0.0967742	0	0.016129	0.0851027	0.0831736
40	0	0	0	0.025974	0.04	0	0.00909091	0.0714286	0	0	0.0146494	0.0242975		40	0.175	0.0487805	0.0422535	0.0196078	0.04	0.190476	0.0227273	0.128571	0	0.0298507	0.0697267	0.0686177
50	0	0	0	0.00877193	0.0588235	0	0.00480769	0.112676		0.0181818	0.0225846	0.0387237		50	0.105263	0.0754717	0.0147059	0.0175439	0.0784314	0	0.00480769	0.0571429		0.0181818	0.0412831	0.0382952
60	0	0	0	0.032967	0.0784314	0	0.0104712	0.08		0	0.02243	0.0339485		60	0.0512821	0.0408163	0.0363636	0.021978	0.0588235	0	0.026178	0.1		0	0.0372713	0.0311134
70	0	0	0	0	0.0526316	0	0.00552486	0.0517241		0.02	0.0144312	0.0223653		70	0	0.056338	0.0212766	0.0405405	0.0263158	0.0416667	0.00552486	0.0862069		0	0.0308744	0.0286835
80	0	0	0.025641	0.0208333	0.108108	0	0	0.107143		0	0.0290806	0.045617		80	0	0.0204082	0.025641	0.0208333	0.162162	0.037037	0.0204082	0.0892857		0.0208333	0.0440677	0.0506472
90	0	0	0	0	0.185185	0	0	0.0645161		0	0.0277446	0.0627774		90	0	0.0117647	0.0512821	0.148936	0.0740741	0.0416667	0.00680272	0.0967742		0	0.0479223	0.0511321
100	0	0	0	0	0.0277778	0.04	0	0.0769231	0	0	0.0144701	0.026236		100	0.0357143	0.0126582	0	0.097561	0.0833333	0	0.0181818	0.134615	0	0	0.0382064	0.0491629
110	0.0217391	0	0	0	0.105263	0	0	0.108108		0	0.0261234	0.046231		110	0.0217391	0.0361446	0	0.0333333	0.157895	0	0.019802	0.108108		0	0.0418913	0.0548936
120	0	0	0.025641	0	0.142857	0	0.01	0.142857		0	0.0357061	0.0613386		120	0.0638298	0.0222222	0	0.2	0.0714286	0.0454545	0.01	0.285714		0	0.0776277	0.0995203
130	0	0	0	0	0.130435	0	0	0.0645161		0	0.0216612	0.0460335		130	0.0434783	0.0131579	0.0322581	0.0666667	0.0869565	0	0	0.193548		0	0.0484518	0.0626925
140	0	0	0	0	0	0	0	0.0434783		0	0.00483092	0.0144928		140	0.0178571	0.0133333	0	0.25	0.0434783	0	0.0140845	0.0869565		0	0.0473011	0.0810172
150	0	0	0	0	0.181818	0	0	0.047619		0	0.025493	0.0607005		150	0	0.0138889	0.0344828	0.28125	0.0909091	0.047619	0.0181818	0.0952381		0	0.0646189	0.0886257
160	0	0	0.04	0.0416667	0.148148	0	0.0142857	0		0	0.0271223	0.0485638		160	0.027027	0	0.04	0.166667	0.148148	0	0.0571429	0.25		0.125	0.0904427	0.0864779
170	0.0232558	0	0	0.0714286	0.117647	0	0	0		0.0714286	0.0315289	0.0442141		170	0.0697674	0	0.04	0.142857	0.0882353	0	0.0175439	0.24		0	0.0664893	0.0812261
180	0	0	0	0	0.030303	0	0.0410959	0.1		0.05	0.0245999	0.0347505		180	0	0	0	0.307692	0.030303	0.111111	0.0684932	0.5		0.05	0.118622	0.172659
190	0	0	0	0	0.0416667	0	0	0.12		0	0.017963	0.0406696		190	0	0.0222222	0	0.230769	0.0416667	0.0555556	0.0263158	0.2		0	0.0640588	0.0882691
200	0.037037	0	0.0909091	0.0357143	0	0	0.0392157	0.115385	0	0	0.0318261	0.0416789		200	0.0740741	0	0	0.357143	0	0.0625	0.0588235	0.461538	0	0.2	0.121408	0.165336
210	0	0	0	0	0	0	0.0526316	0.153846		0	0.022942	0.0520837		210	0	0.02	0.0714286	0.125	0.0740741	0	0.105263	0.307692		0.0909091	0.088263	0.0938883
220	0	0	0	0.133333	0.0689655	0	0.0277778	0.227273	0.25	0	0.0707349	0.0985586		220	0	0.0204082	0	0.4	0.0689655	0	0.111111	0.5	0	0.1	0.120048	0.180555
230	0	0	0	0.0588235	0.0769231	0	0	0.210526	0	0.166667	0.051294	0.0782913		230	0	0	0	0.176471	0.0769231	0.0555556	0	0.526316	0.25	0.0833333	0.11686	0.166679
240	0	0	0	0.2	0.0740741	0	0.0322581	0.142857		0.05	0.0554655	0.0722391		240	0	0	0.0588235	0.0666667	0.111111	0.0625	0.0322581	0.357143		0.2	0.0987225	0.114582
250	0	0	0	0.166667	0.1	0	0.04	0.16	0	0.133333	0.06	0.0720768		250	0.0555556	0.027027	0	0.166667	0.05	0	0.16	0.2	0.5	0.266667	0.142592	0.15545
260	0	0	0	0.16	0.0384615	0	0.133333	0.230769		0.181818	0.0827091	0.0932752		260	0.0625	0	0.0714286	0.24	0	0	0.166667	0.538462		0	0.119895	0.178519
270	0.111111	0	0	0.333333	0	0	0.0909091	0.25	0	0.214286	0.0999639	0.124816		270	0.111111	0	0	0.0555556	0	0	0.0588235	0.333333	0.5	0.214286	0.127311	0.171218
280	0	0.037037	0	0.285714	0.0952381	0	0.0740741	0.238095	0	0.0769231	0.0807082	0.102756		280	0	0.0740741	0	0.428571	0.1	0	0.037037	0.52381	0	0.230769	0.139426	0.192575
290	0	0	0.111111	0.375	0	0	0.0833333	0.133333		0.142857	0.0939594	0.121781		290	0.0555556	0	0.0740741	0.25	0.08	0	0	0.466667		0	0.102922	0.15808
300	0	0	0.0769231	0.238095	0.08	0	0	0.1	0	0	0.0495018	0.077819		300	0	0	0	0.0952381	0.04	0.142857	0.0434783	0.3	0.333333	0	0.0954907	0.126005
310	0	0	0	0.315789	0.0588235	0	0.1	0.25		0	0.0805126	0.121111		310	0	0	0	0.210526	0.117647	0	0.05	0.55		0	0.10313	0.182838
320	0	0	0	0.277778	0.0625	0	0.0909091	0.333333		0.285714	0.116693	0.141209		320	0	0	0	0.111111	0	0	0.0909091	0.466667		0.285714	0.106045	0.165383
330	0.0909091	0	0.0833333	0.222222	0.0714286	0	0.047619	0.230769		0.272727	0.113223	0.102604		330	0.0909091	0	0.25	0.222222	0.107143	0.142857	0.047619	0.307692		0.272727	0.16013	0.107577
340	0	0.0526316	0	0.227273	0.0555556	0.111111	0.047619	0.666667	0.2	0.1	0.146086	0.19809		340	0.125	0	0.0555556	0.227273	0.0555556	0	0.0952381	0.666667	0.2	0.4	0.182529	0.209178
350	0	0	0	0.181818	0.0454545	0	0	0.230769	0.2	0.25	0.0908042	0.10976		350	0	0	0.181818	0.136364	0.0454545	0.25	0.0588235	0.461538	0	0.25	0.1384	0.150426
360	0	0	0.166667	0.285714	0.0869565	0	0.111111	0	0	0.666667	0.131712	0.210893		360	0	0	0.166667	0	0.173913	0	0.0555556	0.363636	0.333333	0.333333	0.142644	0.153511
370	0	0	0.142857	0.294118	0.0666667	0	0	0.142857		0.5	0.127389	0.171652		370	0	0	0	0.176471	0.133333	0.166667	0	0.714286		0.3	0.16564	0.231833
380	0	0	0.142857	0.52381	0	0	0	0.222222		0.222222	0.123457	0.179017		380	0	0	0	0.333333	0.153846	0	0	0.333333		0.222222	0.115859	0.147675
390	0	0	0.0555556	0.222222	0	0.2	0	0.277778	0	0.166667	0.0922222	0.111733		390	0	0.0588235	0.111111	0.277778	0.0909091	0.4	0	0.611111	0.5	0.166667	0.22164	0.216339
400	0	0	0	0.333333	0.0909091	0	0	0.2		0	0.0693603	0.120456		400	0	0	0.142857	0.238095	0.0909091	0.1	0.0833333	0		0.166667	0.0913179	0.0829409
410	0.25	0	0.222222	0.166667	0.105263	0.1	0.230769	0.111111		0.5	0.187337	0.141635		410	0	0	0	0.416667	0.105263	0.2	0.230769	0.444444		0.25	0.183016	0.171946
420	0.0833333	0.0833333	0.166667	0.421053	0.0588235	0.1	0.0666667	0.5		0.333333	0.201468	0.170538		420	0	0	0	0.210526	0	0	0.0666667	0.666667		0.166667	0.123392	0.219077
430	0	0	0.363636	0.461538	0.15	0	0.153846	0.375	0.2	0.2	0.190402	0.166504		430	0.25	0	0	0.0769231	0.1	0	0.0769231	0.5	0.4	0	0.140385	0.181737
440	0	0.0769231	0.125	0.2	0.133333	0.111111	0.2	0.625		0.375	0.205152	0.188457		440	0	0	0.125	0.2	0.0666667	0.111111	0	0.625		0	0.125309	0.200537
450	0	0	0.111111	0.421053	0	0	0		0	0.4	0.103574	0.177863		450	0	0	0	0.157895	0.0909091	0.2	0.166667		0.8	0.2	0.179497	0.24774
460	0	0	0.142857	0.454545	0.125	0	0.111111	0		0.2	0.114835	0.148453		460	0.125	0	0	0.272727	0.1875	0	0	0.4		0.4	0.153914	0.170277
470	0	0.142857	0.111111	0	0.0769231	0.125	0	0		0.333333	0.0876916	0.109658		470	0	0	0.111111	0.545455	0	0	0	0.25		0.333333	0.137767	0.197693
480	0.5	0.333333	0.1	0.5	0	0.111111	0.111111	0.333333		0.714286	0.300353	0.23854		480	0.25	0	0	0.166667	0	0.111111	0	0.333333		0.285714	0.127425	0.13658
490	0.333333	0	0.111111	0.375	0.15	0.166667	0	0.5		0.6	0.248457	0.214704		490	0	0	0.0555556	0.3125	0.15	0	0	0.333333		0.4	0.139043	0.165966
500	0.2	0.111111	0.222222	0.214286	0.0909091	0	0.25		0.5	0	0.176503	0.15331		500	0.2	0.111111	0	0.142857	0.0909091	0	0		0.25	0.4	0.132764	0.134574
1000	0.182857	0.260204	0.220447	0.415966	0.180758	0.174194	0.34	0.561798	0.472222	0.378788	0.318723	0.136475		1000	0.0857143	0.00510204	0.0543131	0.231092	0.0932945	0.0961538	0.07	0.376404	0.444444	0.294416	0.175094	0.151251
1500	0.240506	0.537313	0.2625	0.186441	0.142857	0.258824	0.490909	0.725926	0.648649	0.447761	0.394169	0.203612		1500	0.0384615	0.0298507	0.0625	0.220339	0.2	0.129412	0.0545455	0.244444	0.378378	0.283582	0.164151	0.119459
2000	0.314286	0.7	0.259259	0.0909091	0	0.38	0.789474	0.730769	0.690141	0.415094	0.436993	0.279864		2000	0.0857143	0.05	0.037037	0.0909091	0	0.16	0	0.269231	0.471429	0.396226	0.156055	0.167756
2500	0.173913	0.375	0.25	0.0625		0.578947	0.833333	0.692308	0.625	0.3	0.432333	0.260913		2500	0.0434783	0	0	0.125		0.0526316	0.166667	0.307692	0.5	0.5	0.188385	0.20104

## Sheet: Fig 4D 4E
Figure 4D - Preceeding Silence by Event Length						Figure 4E - Proceeding Silence by Event Length
	Preceding Silence (s)						Proceeding Silence (s)
	Single	2	3	>=4			Single	2	3	>=4
Unit2	0.3638	0.8851	1.173	1.212		Unit2	0.3937	0.4436	0.6091	0.3522
Unit3	0.229	0.7298	0.9677	1.059		Unit3	0.2732	0.05796	0.1342	0.203
Unit6	0.2973	0.6667	0.7828	0.8938		Unit6	0.3278	0.5022	0.3822	0.3595
Unit8	0.2301	0.5114	0.5038	0.5839		Unit8	0.2421	0.4416	0.4089	0.4799
Unit13	0.3	0.4515	0.4384	0.339		Unit13	0.3002	0.4092	0.5091	0.3987
Unit20	0.3913	0.8653	0.9562	1.666		Unit20	0.4475	0.8673	0.6634	0.6831
Unit27	0.1622	0.6837	0.6863	0.8534		Unit27	0.1814	0.4462	0.2971	0.2493
Unit33	0.2401	0.7254	0.9459	1.06		Unit33	0.3342	0.4818	0.4852	0.3607
Unit35	0.744	1.569	1.578	1.715		Unit35	0.8334	1.368	1.296	1.581
Unit36	0.3173	0.9287	0.9545	0.9841		Unit36	0.3257	0.8804	0.9052	0.4155
Mean	0.32751	0.80166	0.89866	1.03662		Mean	0.36592	0.589826	0.56904	0.50829
SD	0.161515	0.310185	0.329388	0.426416		SD	0.180227	0.35991	0.331025	0.398783
