# Supplementary material for: State-dependent activity dynamics of hypothalamic stress effector neurons
Source: eLife. 2022 Jun 30;11:e76832. doi: 10.7554/eLife.76832 (PMC9278954; doi:10.7554/eLife.76832)
Supplement: Figure 5—source data 1. [file elife-76832-fig5-data1.xlsx]

## Sheet: Supplement_i_tot
	0	1	2	3	4	5	6	7	8	9
0	-14.3109	-13.871	-60.4276	6.93133	-12.9799	-11.8073	-15.6093	-8.48886	-9.14304	-31.9887
1	-14.097	-13.7637	-57.8704	5.59715	-12.9219	-11.8078	-15.62	-8.58299	-9.12129	-87.361
2	-13.8918	-13.6603	-55.4876	4.3691	-12.8664	-11.8083	-15.6306	-8.67173	-9.0999	-82.2667
3	-13.6951	-13.5606	-53.2661	3.23836	-12.8131	-11.8089	-15.641	-8.75535	-9.07884	-77.5381
4	-13.5064	-13.4645	-51.1942	2.19692	-12.7621	-11.8096	-15.6514	-8.8341	-9.05811	-73.1479
5	-13.3253	-13.3717	-49.2608	1.23743	-12.7131	-11.8102	-15.6616	-8.90821	-9.0377	-69.0706
6	-13.1514	-13.2822	-47.4558	0.353207	-12.6662	-11.8109	-15.6717	-8.97789	-9.01759	-65.2828
7	-12.9845	-13.1959	-45.7697	-0.461864	-12.6212	-11.8116	-15.6817	-9.04337	-8.99778	-61.763
8	-12.8243	-13.1125	-44.1939	-1.21337	-12.578	-11.8123	-15.6915	-9.10483	-8.97826	-58.4913
9	-12.6704	-13.0321	-42.7202	-1.90643	-12.5366	-11.8131	-15.7013	-9.16248	-8.95902	-55.4493
10	-12.5225	-12.9544	-41.3413	-2.54572	-12.4969	-11.8139	-15.711	-9.21649	-8.94004	-52.6199
11	-12.3804	-12.8793	-40.0503	-3.13553	-12.4588	-11.8147	-15.7206	-9.26703	-8.92133	-49.9877
12	-12.2438	-12.8069	-38.8409	-3.67976	-12.4223	-11.8156	-15.7301	-9.31427	-8.90287	-47.5381
13	-12.1125	-12.7369	-37.7071	-4.18203	-12.3872	-11.8165	-15.7395	-9.35835	-8.88465	-45.2579
14	-11.9862	-12.6692	-36.6436	-4.64562	-12.3536	-11.8174	-15.7488	-9.39944	-8.86667	-43.1346
15	-11.8647	-12.6038	-35.6453	-5.07356	-12.3214	-11.8184	-15.758	-9.43767	-8.84891	-41.1569
16	-11.7478	-12.5407	-34.7076	-5.46861	-12.2904	-11.8194	-15.7671	-9.47317	-8.83138	-39.3144
17	-11.6353	-12.4796	-33.8262	-5.83334	-12.2607	-11.8204	-15.7761	-9.50608	-8.81407	-37.5972
18	-11.5269	-12.4205	-32.9971	-6.17006	-12.2322	-11.8214	-15.7851	-9.5365	-8.79696	-35.9964
19	-11.4226	-12.3633	-32.2166	-6.48094	-12.2048	-11.8225	-15.7939	-9.56456	-8.78005	-34.5036
20	-11.3221	-12.308	-31.4814	-6.76795	-12.1786	-11.8236	-15.8027	-9.59037	-8.76334	-33.1113
21	-11.2253	-12.2545	-30.7882	-7.03289	-12.1534	-11.8247	-15.8114	-9.61403	-8.74681	-31.8122
22	-11.132	-12.2028	-30.1343	-7.27746	-12.1292	-11.8258	-15.8201	-9.63565	-8.73047	-30.5999
23	-11.0421	-12.1526	-29.5168	-7.50317	-12.106	-11.827	-15.8286	-9.65531	-8.71431	-29.4681
24	-10.9553	-12.1041	-28.9333	-7.71145	-12.0837	-11.8282	-15.8371	-9.6731	-8.69831	-28.4112
25	-10.8717	-12.0571	-28.3814	-7.9036	-12.0623	-11.8294	-15.8455	-9.68912	-8.68249	-27.4241
26	-10.7909	-12.0116	-27.8591	-8.08082	-12.0417	-11.8307	-15.8539	-9.70344	-8.66682	-26.5019
27	-10.713	-11.9675	-27.3643	-8.24422	-12.022	-11.832	-15.8621	-9.71615	-8.65131	-25.64
28	-10.6378	-11.9248	-26.8951	-8.39482	-12.0031	-11.8333	-15.8703	-9.72731	-8.63595	-24.8344
29	-10.5651	-11.8834	-26.45	-8.53356	-11.9849	-11.8346	-15.8785	-9.73701	-8.62073	-24.0811
30	-10.4949	-11.8432	-26.0271	-8.66131	-11.9674	-11.8359	-15.8865	-9.7453	-8.60566	-23.3766
31	-10.4271	-11.8043	-25.6252	-8.77888	-11.9507	-11.8373	-15.8945	-9.75225	-8.59072	-22.7175
32	-10.3615	-11.7665	-25.2429	-8.88701	-11.9346	-11.8387	-15.9025	-9.75792	-8.57591	-22.1009
33	-10.2982	-11.7299	-24.8787	-8.98637	-11.9192	-11.8401	-15.9104	-9.76238	-8.56124	-21.5237
34	-10.2368	-11.6943	-24.5317	-9.07761	-11.9043	-11.8416	-15.9182	-9.76567	-8.54668	-20.9834
35	-10.1775	-11.6598	-24.2006	-9.16131	-11.8901	-11.843	-15.9259	-9.76786	-8.53225	-20.4774
36	-10.1201	-11.6263	-23.8846	-9.238	-11.8764	-11.8445	-15.9336	-9.76899	-8.51794	-20.0036
37	-10.0645	-11.5938	-23.5825	-9.3082	-11.8633	-11.846	-15.9413	-9.76911	-8.50374	-19.5596
38	-10.0107	-11.5622	-23.2935	-9.37237	-11.8507	-11.8476	-15.9488	-9.76827	-8.48964	-19.1437
39	-9.95849	-11.5315	-23.0169	-9.43092	-11.8386	-11.8491	-15.9564	-9.76651	-8.47566	-18.7539
40	-9.90793	-11.5017	-22.7518	-9.48427	-11.827	-11.8507	-15.9638	-9.76388	-8.46177	-18.3884
41	-9.85892	-11.4727	-22.4975	-9.53278	-11.8158	-11.8523	-15.9712	-9.76041	-8.44799	-18.0458
42	-9.81139	-11.4445	-22.2534	-9.57679	-11.8051	-11.8539	-15.9786	-9.75615	-8.4343	-17.7245
43	-9.76527	-11.4171	-22.0189	-9.61661	-11.7948	-11.8555	-15.9859	-9.75114	-8.4207	-17.4231
44	-9.72052	-11.3905	-21.7933	-9.65254	-11.785	-11.8571	-15.9932	-9.7454	-8.4072	-17.1404
45	-9.67707	-11.3646	-21.5762	-9.68486	-11.7755	-11.8588	-16.0004	-9.73897	-8.39378	-16.8751
46	-9.63487	-11.3393	-21.367	-9.71381	-11.7664	-11.8605	-16.0075	-9.73188	-8.38045	-16.6261
47	-9.59388	-11.3148	-21.1654	-9.73964	-11.7577	-11.8622	-16.0146	-9.72417	-8.36719	-16.3924
48	-9.55404	-11.2908	-20.9707	-9.76255	-11.7493	-11.8639	-16.0216	-9.71587	-8.35402	-16.173
49	-9.51531	-11.2676	-20.7827	-9.78274	-11.7412	-11.8656	-16.0286	-9.70699	-8.34093	-15.967
50	-9.47763	-11.2449	-20.6009	-9.80042	-11.7335	-11.8673	-16.0356	-9.69758	-8.32791	-15.7736
51	-9.44098	-11.2228	-20.4251	-9.81575	-11.7261	-11.8691	-16.0425	-9.68765	-8.31496	-15.5919
52	-9.40531	-11.2012	-20.2548	-9.82889	-11.719	-11.8709	-16.0493	-9.67723	-8.30208	-15.4213
53	-9.37057	-11.1802	-20.0898	-9.83999	-11.7122	-11.8726	-16.0561	-9.66635	-8.28927	-15.261
54	-9.33674	-11.1597	-19.9298	-9.84921	-11.7056	-11.8744	-16.0629	-9.65502	-8.27653	-15.1104
55	-9.30377	-11.1397	-19.7744	-9.85666	-11.6993	-11.8763	-16.0696	-9.64327	-8.26384	-14.9688
56	-9.27164	-11.1202	-19.6235	-9.86246	-11.6933	-11.8781	-16.0762	-9.63112	-8.25122	-14.8359
57	-9.2403	-11.1012	-19.4769	-9.86674	-11.6875	-11.8799	-16.0829	-9.61858	-8.23866	-14.7109
58	-9.20973	-11.0826	-19.3342	-9.86959	-11.682	-11.8818	-16.0894	-9.60569	-8.22616	-14.5935
59	-9.1799	-11.0644	-19.1953	-9.87112	-42.5096	-11.8836	-16.096	-9.59244	-8.21371	-14.4831
60	293.848	-11.0467	-19.06	-9.87141	-41.1569	-11.8855	-16.1024	-9.57887	-8.20132	-14.3793
61	279.066	-11.0294	-18.928	-9.87056	-39.8684	-11.8874	-16.1089	-9.56499	-8.18898	-14.2818
62	265.098	-11.0124	-18.7994	-9.86863	-38.6406	-11.8892	-16.1153	-9.55082	-8.17669	-14.1901
63	251.894	-10.9959	-18.6738	-9.86571	-37.4706	-11.8911	-16.1216	-9.53636	-8.16445	-14.104
64	239.408	-10.9797	-18.5511	-9.86186	-36.3555	-11.893	-16.1279	-9.52164	-8.15225	-14.023
65	227.597	-10.9638	-18.4312	-9.85715	-35.2924	-11.895	-16.1342	-9.50667	-8.1401	-13.9469
66	216.42	-10.9483	-18.3139	-9.85164	-34.2788	-11.8969	-16.1404	-9.49145	-8.128	-13.8754
67	205.84	-10.9331	-18.1992	-9.84539	-33.3122	-11.8988	-16.1466	-9.47602	-8.11594	-13.8081
68	195.821	-10.9183	-18.0869	-9.83844	-32.3902	-11.9007	-16.1527	-9.46037	-8.10392	-13.745
69	186.331	-10.9037	-17.9769	-9.83084	-31.5107	-11.9027	-16.1588	-9.44451	-8.09194	-13.6856
70	177.337	-10.8895	-134.784	-9.82265	-30.6714	-11.9046	-16.1649	-9.42847	-8.07999	-13.6298
71	168.811	-10.8755	-126.783	-9.8139	-29.8706	-11.9066	-16.1709	-9.41224	-8.06809	-13.5775
72	160.726	-10.8618	-119.314	-9.80463	-29.1061	-11.9085	-16.1769	-9.39585	-8.05622	-43.012
73	153.056	-10.8484	-112.343	-9.79489	-28.3764	-11.9105	-16.1828	-9.3793	-16.0817	-41.0375
74	145.777	-10.8352	-105.836	-9.7847	-27.6796	-11.9125	-16.1887	-9.36259	-15.8357	-39.1984
75	138.867	-10.8223	-99.7621	-9.7741	-27.0141	-11.9144	-16.1945	-9.34574	-15.5989	-37.485
76	132.305	-10.8096	-94.0921	-9.76311	-26.3785	-11.9164	-16.2004	-9.32876	-15.3709	-35.8882
77	126.072	-10.7971	-88.7986	-9.75178	-25.7713	-11.9184	-16.2061	-9.31166	-15.1513	-34.3997
78	120.148	-10.7849	-83.8558	-9.74011	-25.1911	-11.9204	-16.2119	-9.29443	-14.9398	-33.0117
79	114.516	-10.7729	-79.2398	-9.72815	-24.6367	-11.9224	-16.2176	-9.2771	-14.736	-31.7171
80	109.161	-10.7611	-74.9282	-9.71591	-24.1068	-11.9243	-16.2232	-9.25967	-14.5397	251.178
81	104.066	-10.7494	-70.9003	-9.7034	-23.6001	-11.9263	-16.2288	-9.24213	-14.3504	230.268
82	99.2185	-10.738	-67.1365	-9.69067	-23.1158	-11.9283	-16.2344	-9.22451	-14.168	211.141
83	94.6037	-10.7268	-63.6189	-9.67771	-22.6525	-11.9303	-16.2399	-9.20681	-13.9922	193.634
84	90.2094	-10.7158	-60.3305	-9.66456	-22.2095	-11.9323	-16.2454	-9.18903	-13.8226	177.601
85	86.0237	-10.7049	-57.2557	-9.65122	-21.7856	-11.9343	-16.2509	-9.17118	-13.659	162.911
86	82.0353	-10.6942	-54.3799	-9.63771	-21.3801	-11.9363	-16.2563	-9.15326	-13.5012	149.442
87	78.2338	-10.6836	-51.6895	-9.62405	-20.992	-11.9383	-16.2617	-9.13529	-13.349	137.087
88	74.6094	-10.6733	-49.1719	-9.61025	-20.6206	-11.9402	310.282	-9.11725	-13.202	125.748
89	71.1526	-10.663	-46.8155	-9.59633	-20.265	-11.9422	298.18	-9.09917	-13.0602	115.334
90	67.8548	-10.6529	-44.6091	-9.58228	-19.9246	-11.9442	286.611	-9.08104	-12.9232	105.767
91	64.7076	-10.643	-42.5428	-9.56814	-19.5986	-11.9462	275.548	-9.06287	-12.791	96.9716
92	61.7034	-10.6332	-40.6071	-9.5539	-19.2864	-11.9482	264.966	-9.04466	-12.6633	88.8821
93	58.8347	-10.6235	-38.7931	-9.53958	-18.9874	-11.9501	254.841	-9.02642	-12.5399	81.4379
94	56.0948	-10.614	-37.0928	-9.52518	-18.7009	-11.9521	245.152	-9.00815	-12.4206	74.5841
95	53.4771	-10.6046	-35.4985	-9.51072	-18.4263	-11.9541	235.877	-8.98986	-12.3054	68.2707
96	50.9754	-10.5953	-34.0031	-9.4962	-18.1632	-11.956	226.995	-8.97154	-12.194	62.4523
97	48.5839	-10.5861	-32.6001	-9.48162	-17.911	-11.958	218.488	-8.95321	-12.0863	57.0874
98	46.2973	-10.577	-31.2834	-9.46701	-17.6693	-11.9599	210.337	-8.93485	-11.9821	52.1384
99	44.1103	-10.5681	-30.0473	-9.45236	-17.4375	-11.9619	202.526	-92.36	-11.8813	47.5708
100	42.018	-10.5592	-28.8865	-9.43767	-17.2152	-11.9638	195.037	-88.979	-11.7838	43.3533
101	40.0159	-10.5504	-27.796	-9.42296	-17.0019	-11.9657	187.857	-85.7444	-11.6895	39.4573
102	38.0996	-10.5418	-26.7712	-9.40824	-16.7974	-11.9676	180.97	-82.6495	-11.5981	35.8567
103	36.265	-10.5332	-25.8079	-9.39349	-16.6012	-11.9696	174.361	-79.6881	-11.5097	32.5275
104	34.5081	-10.5247	-24.9022	-9.37874	-16.4129	-11.9715	168.019	-76.8542	-11.4241	29.448
105	32.8253	-10.5163	-24.0502	-9.36398	-16.2321	-11.9734	161.931	-74.142	-11.3411	26.5983
106	31.2131	-13.6972	-23.2485	-9.34921	-16.0587	-11.9753	156.085	-71.5461	-11.2608	23.9599
107	29.6681	-13.5762	-22.4939	-9.33445	-15.8921	-11.9771	150.469	-69.0611	-11.1829	21.5163
108	28.1874	-13.4602	-21.7834	-9.3197	-15.7322	-11.979	145.073	-66.6822	-11.1074	19.2521
109	26.7678	-13.3488	-21.1142	-9.30495	-15.5786	-11.9809	139.887	-64.4044	-11.0342	17.1532
110	25.4066	-13.242	-20.4837	-9.29021	-15.4311	-56.8428	134.901	-62.2232	-10.9633	15.2069
111	24.1011	-13.1395	-19.8894	-9.27549	-15.2894	-55.2757	130.106	-60.1344	-10.8944	13.4013
112	22.8487	-13.041	-19.3291	-9.26079	-15.1533	-53.7687	125.494	-58.1336	-10.8276	11.7255
113	21.6472	-12.9465	-18.8006	-9.2461	-15.0225	-52.3191	121.056	-56.217	-10.7628	10.1696
114	20.4941	-12.8557	-18.302	-9.23144	-14.8968	-50.9247	116.785	-54.3808	-10.6999	8.72446
115	19.3874	-12.7684	-17.8314	-9.2168	-14.7759	-49.5831	112.672	-52.6214	-10.6388	7.38171
116	18.3249	-12.6846	-17.387	-9.20218	-14.6597	-48.2923	108.712	-50.9353	-10.5794	6.13359
117	17.3048	-12.604	-16.9673	-9.18759	-14.548	-47.0501	104.897	-49.3192	-10.5218	4.97299
118	16.3251	-12.5265	-16.5707	-9.17303	-14.4406	-45.8546	101.221	-47.77	-10.4658	3.89338
119	15.3841	-12.452	-16.1959	-9.1585	-14.3373	-44.7039	97.6786	-46.2848	-10.4113	2.88874
120	14.4802	-12.3804	-15.8415	-9.14401	-14.2379	-43.5961	94.263	-44.8607	-10.3584	1.95351
121	13.6117	-12.3115	-15.5062	-9.12954	-14.1422	-42.5295	90.9692	-43.495	-10.3069	1.08258
122	12.7771	-12.2451	-15.189	-9.11511	-14.0502	-41.5025	87.7919	-42.1851	-10.2569	0.271236
123	11.9749	-12.1813	-14.8887	-9.10072	-13.9616	-40.5134	84.7263	-40.9285	-10.2082	-0.484867
124	11.2039	-12.1198	-14.6044	-9.08636	-13.8764	-39.5608	81.7676	-39.7228	-10.1608	-1.18974
125	10.4626	-12.0606	-14.335	-9.07204	-13.7943	-38.6432	78.9114	-38.566	-10.1146	-1.84709
126	9.74984	-12.0036	-14.0798	-9.05776	-13.7153	-37.7591	76.1533	-37.4557	-10.0697	-2.46034
127	9.06443	-11.9487	-13.8378	-9.04352	-13.6392	-36.9073	73.4895	-36.39	-10.0259	-3.03264
128	8.40521	-11.8958	-13.6082	-9.02931	-13.5659	-36.0865	70.9159	-35.3669	-9.98324	-3.56691
129	7.77111	-11.8447	-13.3905	-9.01515	-13.4953	-35.2955	68.4289	-34.3845	-9.94168	-4.06585
130	7.1611	-11.7955	-13.1838	-9.00102	-13.4273	-34.533	66.0249	-33.4412	-9.90116	-4.53196
131	6.57419	-11.7481	-12.9875	-8.98694	-13.3618	-33.7979	63.7008	-32.5352	-9.86165	-4.96754
132	6.00944	-11.7023	-12.8011	-8.9729	-13.2986	-33.0893	-31.4544	-31.6648	-9.82312	-5.37474
133	5.46596	-11.6581	-12.6239	-8.95889	-13.2377	-32.406	-30.6825	-30.8286	-9.78552	-5.75553
134	4.94289	-11.6155	-12.4554	-8.94494	-13.179	-31.747	-29.9458	-30.0252	-9.74882	-6.11174
135	4.43941	-11.5743	-12.2952	-8.93102	-13.1224	-31.1115	-29.2425	-29.253	-9.713	-6.44508
136	-95.0176	-11.5346	-12.1428	-8.91714	-13.0679	-30.4984	-28.571	-28.5107	-9.67802	-6.75711
137	-91.0405	-11.4962	-11.9977	-8.90331	-13.0152	-29.907	-27.9297	-27.7972	-9.64385	-7.0493
138	-87.2581	-11.4591	-11.8595	-8.88952	-12.9644	-29.3364	-27.3172	-27.1111	-9.61047	-7.323
139	-83.6609	-11.4232	-11.7279	-8.87577	-12.9155	-28.7858	-26.7321	-26.4513	-9.57784	-7.57946
140	-80.2394	-11.3885	-11.6024	-8.86207	-12.8682	-28.2544	-26.1729	-25.8167	-9.54594	-7.81986
141	-76.9848	-11.355	-11.4827	-8.84841	-12.8226	-27.7415	-25.6386	-25.2063	-9.51475	-8.04527
142	-73.8887	-11.3225	-11.3686	-8.83479	-12.7785	-27.2464	-25.1278	-24.619	-9.48423	-8.2567
143	-70.943	-11.2911	-11.2596	-8.82121	-12.736	-26.7684	-24.6394	-74.9414	-9.45438	-8.45508
144	-68.1402	-11.2607	-11.1556	-8.80767	-12.695	-26.3069	-24.1724	-71.6857	-9.42515	-8.64128
145	-65.4729	-11.2313	-11.0563	-8.79418	-12.6553	-25.8613	-23.7257	-117.311	-9.39654	-8.81611
146	-62.9343	-11.2028	-10.9613	-8.78073	-12.617	-25.4309	-23.2985	-110.392	-9.36851	-8.98032
147	-60.5179	-11.1752	-10.8705	-8.76732	-12.5801	-25.0152	-22.8896	-103.943	-9.34106	-9.1346
148	-58.2174	-11.1484	-10.7836	-8.75395	-12.5443	-24.6136	-22.4984	-97.9306	-9.31416	-9.27961
149	-56.027	-11.1224	-10.7005	-8.74063	-12.5098	-24.2257	-22.1239	-92.3237	-9.28778	-9.41595
150	-53.9411	-11.0973	-10.6208	-8.72734	-12.4764	-23.8508	-21.7654	-87.0938	-9.26193	-9.54418
151	-51.9544	-11.0728	-10.5446	-8.7141	-12.4441	-23.4885	-21.4221	-82.2141	-9.23656	-9.66483
152	-50.0619	-11.0491	-10.4715	-8.70089	-12.4129	-23.1384	-21.0933	-77.66	-9.21168	-9.77839
153	-48.2587	-11.0261	-10.4014	-8.68773	-12.3828	260.421	-20.7784	-73.4087	-9.18726	-9.88531
154	-46.5406	-11.0038	-10.3341	-8.67461	-12.3536	247.615	-20.4767	-69.439	-9.16328	-9.98602
155	-44.903	-10.9821	-10.2696	-8.66153	-12.3253	235.494	-20.1876	-65.7311	-9.13974	-10.0809
156	-43.342	-10.961	-10.2076	-8.64848	-12.298	224.018	193.247	-62.2669	-9.11661	-10.1704
157	-41.8538	-10.9405	-10.148	-8.63548	-12.2716	213.149	181.562	-59.0295	-9.09389	-10.2547
158	-40.4347	-10.9205	-10.0907	-8.62252	-12.246	202.849	170.599	-56.0031	-9.07156	-10.3342
159	-39.0813	-10.9011	-10.0356	-8.60959	-12.2213	193.086	160.305	-53.1733	-9.0496	-10.4093
160	-37.7902	-10.8823	-9.98261	-8.5967	-12.1973	183.829	150.635	-50.5265	-9.02801	-10.4802
161	-36.5585	-10.8639	-9.93156	-8.58385	-12.174	175.048	141.545	-48.0502	-9.00677	-10.5471
162	-35.383	-10.846	-9.88238	-8.57104	-12.1515	166.715	132.994	-45.7328	-8.98587	-10.6104
163	-34.2612	-10.8285	-9.83497	-8.55827	-12.1298	158.804	124.947	-43.5634	-8.96529	-10.6702
164	-33.1903	-10.8116	-9.78926	-8.54553	-12.1086	151.292	117.369	-41.5321	-8.94504	-10.7267
165	-32.1678	-10.795	-9.74515	-8.53283	-12.0882	144.155	110.227	-39.6295	-8.92509	-10.7802
166	-31.1913	-10.7788	-9.70256	-8.52016	-12.0683	137.372	103.495	-37.847	-8.90543	-10.8308
167	-30.2587	-10.7631	-9.66142	-8.50753	-12.0491	130.924	97.1432	-36.1765	-8.88607	-10.8787
168	-101.303	-10.7477	-9.62167	-8.49493	-12.0304	124.792	91.1481	-34.6105	-8.86698	-10.9241
169	-96.114	-10.7327	-9.58322	-8.48237	-12.0123	118.957	85.4863	-33.1422	-8.84816	-10.9671
170	-91.2356	-10.718	-9.54603	-8.46985	-11.9948	113.404	80.1364	-31.7649	-8.8296	-11.0079
171	-86.6482	-10.7037	-9.51002	-8.45735	-11.9777	108.117	75.0787	-30.4727	-8.81129	-11.0466
172	-82.3334	-10.6897	-9.47514	-8.4449	-11.9612	103.082	70.2947	-29.26	-8.79322	-11.0834
173	-78.2743	-10.676	-9.44134	-8.43247	-11.9451	98.2849	65.7673	-28.1216	-8.77539	-11.1183
174	-74.455	-10.6626	-9.40857	-8.42008	-11.9296	93.7127	61.4808	-27.0527	-8.75778	-11.1514
175	-70.8605	-10.6494	-9.37678	-8.40772	-11.9144	89.3535	57.4203	-26.0486	-8.74039	-11.183
176	-67.4769	-10.6366	-9.34592	-8.39539	-11.8997	85.196	53.5723	-25.1053	-8.72322	-11.213
177	-64.2911	-10.624	-9.31595	-8.38309	-11.8854	81.2296	49.924	-24.2187	-8.70625	-11.2415
178	-61.2909	-10.6117	-9.28682	-8.37082	-11.8715	77.4442	46.4635	-23.3853	-8.68947	-11.2687
179	-58.4648	-10.5996	-9.25851	-8.35859	-11.858	73.8304	43.1798	-22.6016	-8.67289	-11.2946
180	-55.8022	-10.5878	-9.23096	-8.34638	-11.8449	70.3793	40.0626	-21.8645	-8.6565	-11.3193
181	-53.293	-10.5762	-9.20415	-8.33421	-11.8321	67.0825	37.1023	-21.1709	-8.64028	-11.3429
182	-50.9278	-10.5648	-9.17805	-8.32206	-11.8197	63.9323	34.2899	-20.5181	-8.62424	-11.3654
183	-48.6978	-10.5536	-9.15261	-8.30995	-11.8076	60.921	31.6172	-19.9036	-8.60837	-11.3869
184	-46.5948	-10.5426	-9.12781	-75.6201	-23.3975	58.0419	29.0762	-19.325	-8.59266	-11.4074
185	-44.6112	-10.5318	-9.10363	-72.5639	-22.8884	55.2882	26.6597	-18.7799	-8.5771	-11.4271
186	-42.7396	-10.5212	-9.08003	-69.658	-22.4026	52.6536	24.3608	-18.2663	-8.5617	-11.4459
187	-40.9734	-10.5108	-9.05698	-66.8946	-21.939	50.1325	22.1731	-17.7823	-8.54645	-11.464
188	-39.3062	-10.5006	-9.03447	-64.2664	-21.4964	47.7191	20.0906	-17.326	-8.53133	-11.4813
189	-37.732	-10.4905	-9.01247	-61.7662	-21.0738	45.4083	18.1078	-16.8956	-8.51636	-11.4979
190	-36.2454	-10.4806	-8.99096	-59.3874	-20.6703	43.1951	16.2192	-16.4896	-8.50152	-11.5138
191	-34.8411	-10.4708	-8.96992	-57.1238	-20.2849	41.0748	14.42	-16.1066	-8.48681	-11.5291
192	-33.5143	-10.4612	-8.94932	-54.9694	-19.9168	39.043	12.7055	-15.745	-8.47222	-11.5439
193	-32.2603	-10.4517	-8.92914	-52.9187	-19.5651	37.0955	11.0714	-15.4037	-8.45775	-11.558
194	-31.0749	-10.4423	-8.90938	-50.9661	-19.2289	35.2284	9.51347	-15.0812	-8.4434	-11.5717
195	-29.954	-10.4331	-8.89001	-49.1068	-28.4494	230.391	8.02793	-14.7767	-8.42916	-11.5849
196	-28.8939	-10.424	-8.87101	-47.336	-27.4957	217.043	6.61113	-14.4888	-8.41503	-11.5976
197	-27.8911	-10.4151	-8.85237	-45.6491	-26.5987	204.482	5.25963	-14.2167	-8.40101	-11.6099
198	-26.9421	-10.4062	-8.83407	-44.0419	-25.7546	192.652	3.9702	-13.9595	-8.38709	-11.6217
199	-26.044	-10.3975	-8.8161	-42.5103	-24.9602	181.501	2.73981	-13.7161	-8.37327	-11.6332
200	-25.1937	-10.3889	-8.79845	-41.0504	-24.2123	170.982	1.56557	-13.4858	-8.35954	-11.6444
201	-24.3886	-10.3803	-8.7811	-39.6588	-23.5081	161.051	0.444783	-13.2679	-8.34591	-11.6551
202	-23.626	-10.3719	-8.76404	-38.3319	-22.8449	151.668	-0.625124	-13.0615	-8.33236	-11.6656
203	-22.9035	-10.3636	-8.74726	-37.0665	-22.2201	142.794	-1.64657	-12.8661	-8.31891	-11.6757
204	-22.2188	-10.3554	-8.73074	-35.8596	-21.6313	134.395	-2.62183	-12.681	-8.30553	-11.6856
205	-21.5698	-10.3472	-8.71448	-34.7081	-21.0763	126.439	-3.55308	-12.5055	-8.29224	-11.6952
206	-20.9545	-10.3391	-8.69847	-33.6093	-20.5531	118.897	-4.44237	-12.3392	-8.27902	-11.7045
207	-20.371	-10.3312	-8.68269	-32.5607	-20.0597	111.742	-5.29162	-12.1814	-8.26589	-11.7136
208	-19.8175	-10.3233	-8.66714	-31.5598	-19.5943	104.947	-6.10269	-12.0318	-8.25282	-11.7225
209	-19.2923	-10.3154	-8.6518	-30.6042	-19.1552	98.4904	-6.87731	-11.8898	-8.23983	-11.7312
210	-18.7939	-10.3077	-8.63667	-29.6916	-18.7408	92.3497	-7.61712	-11.7549	-8.2269	-11.7396
211	-18.3207	-10.3	-8.62174	-28.82	-18.3497	86.5052	-8.3237	-11.6269	-8.21404	-11.7479
212	-17.8715	-10.2924	-8.60701	-27.9874	-17.9804	80.9382	-8.99853	-11.5053	-8.20125	-11.756
213	-17.4448	-10.2848	-8.59246	-27.1918	-17.6316	75.6315	-9.64301	-11.3897	-8.18851	-11.7639
214	-17.0394	-10.2773	-8.57809	-26.4316	-17.3021	70.5692	-10.2585	-11.2798	-8.17584	-11.7717
215	-16.6543	-10.2699	-8.56388	-25.7049	-16.9908	65.7364	-10.8463	-11.1753	-8.16322	-11.7793
216	-16.2882	-10.2625	-8.54984	-25.0101	-16.6966	61.1193	-11.4075	-11.0758	-8.15066	-11.7868
217	-15.9401	-10.2552	-8.53596	-24.3458	-16.4185	56.7052	-11.9433	-10.9812	-8.13816	-11.7941
218	-15.6091	-10.2479	-8.52223	-23.7105	-16.1555	52.482	-12.4549	-10.8911	-8.1257	-11.8013
219	-15.2942	-10.2407	-8.50865	-23.1028	-15.9068	48.4388	-12.9433	-10.8052	-8.1133	-11.8084
220	-14.9947	-10.2335	-8.4952	-22.5213	-15.6716	44.5651	-13.4094	-10.7234	-8.10095	-11.8154
221	-14.7096	-10.2264	-8.48189	-21.9648	-15.449	40.8514	-13.8542	-10.6455	-8.08864	-11.8223
222	-14.4382	-10.2193	-8.46871	-21.4322	-15.2383	37.2885	-14.2786	-10.5711	-8.07638	-11.8291
223	-14.1798	-10.2122	-8.45566	-20.9224	-15.0388	33.8683	-14.6834	-10.5001	-8.06417	-11.8358
224	-13.9336	-10.2052	-8.44272	-20.4342	-14.8499	30.5826	-15.0696	-10.4324	-8.05199	-11.8424
225	-13.6991	-10.1982	-8.42991	-19.9666	-14.671	27.4244	-15.4378	-10.3677	-8.03986	-11.849
226	-13.4757	-10.1913	-8.4172	-19.5188	-19.3117	24.3866	-15.7887	-10.3059	-8.02777	-11.8554
227	-13.2627	-10.1844	-8.4046	-19.0897	-18.7928	21.4628	-16.1232	-10.2468	-8.01571	-11.8618
228	-13.0596	-10.1775	-8.3921	-18.6785	-18.3091	18.6471	-16.4419	-10.1904	-8.00369	-11.8681
229	-12.8659	-10.1707	-8.3797	-18.2844	-17.8581	15.9337	-16.7454	-10.1363	-7.99171	-11.8744
230	-12.6811	-10.1639	-8.3674	-17.9066	-17.4373	13.3174	-17.0344	-10.0846	-7.97976	-11.8806
231	-12.5048	-10.1571	-8.35519	-17.5444	-17.0447	10.7931	-17.3094	-10.035	-7.96785	-11.8867
232	-12.3365	-10.1504	-8.34307	-17.197	-16.6783	8.35619	-17.571	-9.98758	-7.95597	-11.8928
233	-12.1758	-10.1437	-8.33103	-16.8638	-16.3361	6.00226	-17.8197	-9.94209	-7.94412	-11.8989
234	-12.0223	-10.137	-8.31908	-16.544	-16.0166	3.72715	-18.0561	-9.89845	-7.9323	-11.9048
235	-11.8757	-10.1303	-8.3072	-16.2373	-15.718	1.52694	-18.2807	-9.85657	-7.92051	-11.9108
236	-11.7356	-10.1237	-8.2954	-15.9428	-15.4391	-0.60206	-18.4939	-9.81637	-7.90874	-11.9167
237	-11.6017	-10.117	-8.28368	-15.6601	-15.1783	-2.66334	-18.6962	-9.77774	-7.89701	-11.9226
238	-11.4737	-10.1104	-8.27203	-15.3887	-14.9344	-4.66018	-18.888	-9.74062	-7.8853	-11.9284
239	-11.3512	-10.1038	-8.26044	-15.128	-14.7063	-6.5957	-19.0697	-9.70492	-7.87361	-11.9342
240	-11.234	-10.0973	-8.24892	-14.8776	-14.4928	-8.47284	-19.2418	-9.67057	-7.86195	-11.94
241	-11.1219	-10.0907	-8.23747	-14.637	-14.2931	-10.2944	-19.4046	-9.6375	-7.85031	-11.9458
242	-11.0146	-10.0842	-8.22607	-14.4058	-14.106	-12.063	-19.5585	-9.60564	-7.83869	-11.9515
243	-10.9118	-10.0777	-8.21474	-14.1836	-13.9309	-13.7812	-19.7038	-9.57493	-7.8271	-11.9572
244	-10.8133	-10.0712	-8.20346	-13.97	-13.7668	-15.4513	-19.8408	-9.54531	-7.81552	-11.9629
245	-48.7191	-10.0647	-8.19223	-13.7645	-13.613	-17.0756	-19.97	-9.51673	-7.80397	-11.9685
246	-46.5228	-10.0582	-8.18106	-13.5669	-13.4689	-18.6562	-20.0915	-9.48913	-7.79243	-11.9742
247	-44.457	-10.0517	-8.16994	-52.3127	-13.3338	-20.1953	-20.2058	-9.46246	-7.78092	-11.9798
248	-42.5136	-10.0453	-8.15887	-50.1287	-13.207	-21.6948	-20.313	-9.43668	-7.76942	-11.9854
249	-40.6848	-10.0388	-8.14785	-48.0633	-13.0881	-23.1564	-20.4135	-9.41174	-7.75794	-11.9909
250	-38.9634	-10.0324	-8.13687	-46.1096	-12.9764	-24.5821	-20.5075	-9.38759	-7.74647	-11.9965
251	-37.3427	-10.0259	-8.12594	-44.2612	-12.8716	-25.9735	-20.5953	-9.36421	-7.73502	-12.0021
252	-35.8165	-10.0195	-8.11505	-42.5119	-12.7732	-27.3322	-20.677	-9.34154	-7.72359	-12.0076
253	-34.3788	-10.0131	-8.1042	-40.8561	-12.6808	-28.6599	-20.7531	-9.31956	-7.71217	-12.0131
254	-33.0241	-10.0067	-8.09338	-39.2884	-12.5939	-29.9579	-20.8236	-9.29822	-7.70076	-12.0186
255	-31.7474	-10.0003	-8.08261	-37.8038	-12.5122	-31.2278	-20.8887	-9.2775	-7.68937	-12.0241
256	-30.5438	-9.99391	-8.07187	-36.3977	-12.4354	-32.4709	-20.9488	-9.25737	-7.67799	-12.0296
257	-29.4089	-9.98751	-8.06117	-35.0654	-12.3631	-33.6886	-21.004	-9.23779	-7.66662	-12.0351
258	-28.3384	-9.98113	-8.0505	-33.803	-12.2952	-34.8821	-21.0544	-9.21875	-7.65527	-12.0406
259	-27.3285	-12.5488	-8.03987	-32.6064	-12.2312	-36.0527	-21.1004	-9.2002	-7.64392	-12.046
260	-26.3755	-12.4634	-8.02926	-31.472	-12.1709	-37.2017	-21.1419	-9.18213	-7.63259	-12.0515
261	-25.4759	-12.3813	-8.01869	-30.3962	-12.1142	-38.3301	-21.1793	-9.16452	-7.62127	-12.057
262	-24.6265	-12.3023	-8.00814	-29.3759	-12.0607	-39.439	-21.2127	-9.14734	-7.60995	-12.0624
263	-23.8243	-12.2265	-7.99762	-28.4079	-12.0103	-40.5297	-21.2422	-9.13056	-7.59865	-12.0678
264	-23.0665	-12.1535	-7.98713	-27.4894	-11.9628	-41.6032	-21.2679	-9.11418	-7.58735	-12.0733
265	-22.3505	-12.0833	-7.97667	-26.6176	-11.9179	-42.6605	-21.2902	-9.09817	-7.57607	-12.0787
266	-21.6737	-12.0158	-7.96623	-25.7899	-11.8756	-43.7026	-21.309	-9.08251	-7.56479	-12.0841
267	-21.0339	-11.9508	-7.95581	-25.004	-11.8357	-44.7306	-21.3245	-9.06718	-7.55352	-12.0895
268	-20.4289	-11.8883	-7.94542	-24.2576	-11.798	-45.7454	-21.3368	-9.05218	-7.54226	-12.0949
269	-19.8565	-11.828	-7.93504	-23.5485	-11.7623	-46.748	-21.3462	-9.03747	-7.531	-12.1004
270	-19.3151	-11.77	-7.92469	-22.8747	-11.7287	-47.7394	-21.3526	-9.02305	-7.51975	-12.1058
271	-18.8026	-11.7141	-7.91436	-22.2343	-11.6969	-48.7206	-21.3562	-9.00891	-7.50851	-12.1112
272	-18.3175	-11.6603	-7.90405	-21.6255	-11.6667	-49.6924	-21.3572	-8.99502	-7.49728	-12.1165
273	-17.8581	-11.6083	-7.89376	-21.0466	-11.6383	-50.6558	-21.3556	-8.98139	-7.48605	-12.1219
274	-17.4231	-11.5583	-7.88349	-20.496	-11.6113	-51.6118	-21.3515	-8.96798	-7.47482	-12.1273
275	-17.0109	-11.51	-7.87323	-19.9722	-11.5858	-52.5612	-21.345	-8.95481	-7.4636	-12.1327
276	-16.6203	-11.4634	-7.86299	-19.4738	-11.5616	-53.5051	-21.3363	-8.94184	-7.45239	-12.1381
277	-16.25	-11.4185	-7.85276	-18.9995	-11.5386	-54.4443	-21.3254	-8.92907	-7.44118	-12.1435
278	-15.899	-11.3751	-7.84255	-18.548	-11.5169	-55.3799	-21.3125	-8.9165	-7.42997	-12.1488
279	-15.566	-11.3332	-7.83235	-18.118	-11.4962	-56.3128	-21.2975	-8.90411	-7.41877	-12.1542
280	-15.2501	-11.2928	-7.82217	-17.7085	-11.4767	-57.244	-21.2807	-8.89189	-7.40757	-12.1596
281	-14.9504	-11.2537	-7.812	-17.3184	-11.4581	-58.1745	-21.262	-8.87984	-7.39638	-12.1649
282	-14.6659	-11.2159	-7.80184	-16.9466	-11.4404	-59.1053	-21.2415	-8.86794	-7.38518	-12.1703
283	-14.3958	-11.1794	-7.7917	-16.5923	-11.4236	-60.0376	-21.2194	-8.85619	-7.374	-12.1756
284	-14.1392	-11.1441	-7.78156	-16.2546	-11.4076	-60.9723	-21.1957	-8.84458	-7.36281	-12.181
285	-13.8955	-11.1099	-7.77144	-15.9325	-11.3924	-61.9107	-21.1704	-8.83311	-7.35163	-12.1863
286	-13.6639	-11.0768	-7.76133	-15.6253	-11.3779	-62.8538	-21.1437	-8.82176	-7.34045	-12.1917
287	-13.4438	-11.0448	-7.75122	-15.3323	-11.3641	-63.803	-21.1156	-8.81054	-7.32927	-12.197
288	-13.2345	-11.0138	-7.74113	-15.0526	-11.351	-64.7595	-21.0862	-8.79942	-7.3181	-12.2023
289	-13.0354	-10.9838	-7.73104	-14.7857	-11.3384	-65.7246	-21.0555	-8.78842	-7.30692	-12.2077
290	-12.846	-10.9548	-7.72096	-14.5309	-11.3265	-66.6998	-21.0235	-8.77752	-7.29575	-12.213
291	-12.6658	-10.9266	-7.71089	-14.2876	-11.315	-67.6865	-20.9904	-8.76672	-7.28458	-12.2183
292	-12.4942	-10.8992	238.295	-14.0551	-11.3041	-68.6864	-20.9563	-8.75601	-7.27342	-12.2236
293	-12.3309	-10.8727	227.817	-13.8331	-11.2936	-69.7012	-20.921	-8.74538	-7.26225	-12.2289
294	-12.1753	-12.9381	217.85	-13.6208	-11.2836	-70.7326	-20.8848	-8.73484	-7.25108	-12.2343
295	-12.027	-12.8169	208.365	-13.418	-11.2741	-71.7825	-20.8476	-8.72438	-7.23992	-12.2396
296	-11.8857	-12.7019	199.335	-13.224	-11.2649	-72.8532	-20.8095	-8.714	-7.22875	-12.2448
297	-11.751	-12.5926	190.734	-13.0385	-11.2561	-73.9468	-140.819	-8.70368	-7.21759	-12.2501
298	-11.6225	-12.4887	182.538	-12.861	-11.2477	-75.0657	-135.759	-8.69343	-7.20643	-12.2554
299	-11.5	-12.3899	174.725	-12.6912	-11.2396	-76.2127	-130.901	-8.68324	-7.19527	-12.2607
300	-11.383	-12.2961	167.273	-12.5286	-11.2318	-77.3906	-126.239	-8.67312	-7.18411	-12.266
301	-35.1863	-12.2068	160.163	-12.373	-11.2243	-78.6026	-121.764	-8.66304	-7.17295	-12.2712
302	-33.6684	-12.1218	153.376	-12.224	-11.2171	-79.8524	-117.47	-8.65303	-7.16179	-12.2765
303	-32.2457	-12.0409	146.895	-12.0812	-11.2101	-81.1436	-113.351	-8.64306	-7.15062	-12.2817
304	-30.912	-11.9639	140.703	-11.9444	-11.2034	-82.4808	-109.4	-8.63313	-7.13946	-12.287
305	-29.6612	-11.8906	134.784	-11.8133	-11.197	-83.8687	-105.61	-8.62326	-7.1283	-12.2922
306	-28.4879	-11.8208	129.124	-11.6876	-11.1907	-85.3128	-101.975	-8.61342	-7.11714	-12.2975
307	-27.387	-11.7542	123.709	-11.5671	-11.1847	-86.8191	-98.4885	-8.60362	-7.10598	-12.3027
308	-26.3537	-11.6907	118.527	-11.4515	-11.1789	-88.3948	-95.1454	-8.59386	-7.09482	-12.3079
309	-25.3836	-11.6302	113.565	-11.3405	-11.1732	-90.0476	-91.9394	-8.58413	-7.08366	-12.3131
310	-24.4725	-11.5724	108.811	-11.234	-11.1678	-91.7867	-88.8649	-8.57444	-7.0725	-12.3183
311	-23.6167	-11.5173	104.256	-11.1318	-11.1625	-93.6227	-85.9166	-8.56477	-7.06133	-12.3235
312	-42.9948	-11.4647	99.8889	-33.3268	-11.1573	-95.5677	-83.0892	-8.55513	-7.05017	-12.3287
313	-40.6214	-11.4144	95.7001	-32.0355	-11.1524	-97.6363	-80.3777	-8.54552	-7.03901	-12.3339
314	-38.4267	-11.3664	91.6807	-30.8185	-11.1475	-99.8454	-77.7773	-8.53593	-7.02784	-12.339
315	-36.3966	-11.3205	87.8223	-29.6711	-11.1428	-102.215	-75.2834	-8.52636	-7.01668	-12.3442
316	-34.518	-11.2766	84.117	-28.5891	-11.1382	-104.771	-72.8913	-8.51682	-7.00551	-12.3493
317	-32.779	-11.2346	80.5572	-27.5685	-11.1337	-107.542	-70.5969	-8.50729	-6.99434	-12.3545
318	-31.1687	-11.1945	77.1358	-26.6055	-11.1293	-332.165	-68.3961	-8.49778	-6.98318	-12.3596
319	-29.6771	-11.156	73.8461	-25.6968	-11.1251	-329.17	-66.2847	-8.48829	-6.97201	-12.3647
320	-28.2949	-11.1192	70.6818	-24.8389	-11.1209	-326.118	-64.2592	-8.47881	-6.96084	251.38
321	-27.0136	-11.0839	67.637	-24.0289	-11.1168	-323.005	-62.3157	-8.46934	-6.94967	239.87
322	-25.8255	-11.0501	64.7061	-23.2639	-11.1128	-266.385	-60.4509	-8.45988	-6.93849	228.939
323	-24.7234	-11.0176	61.8836	-22.5411	-11.1089	-265.455	-58.6614	-8.45044	-6.92732	218.554
324	-23.7008	-10.9865	59.1646	-21.8582	-11.1051	-264.581	-56.9439	-8.441	-6.91615	208.683
325	-22.7515	-10.9566	56.5444	-21.2126	-11.1013	-263.765	-55.2955	-8.43158	-6.90497	199.297
326	-21.87	-10.9279	54.0183	-20.6023	-11.0976	-263.01	-53.7132	-8.42215	-6.8938	190.37
327	-21.0511	-10.9004	51.5823	-20.0251	-11.094	-262.318	-52.1941	-8.41274	-6.88262	181.874
328	-20.2902	-10.8739	49.2322	-19.4791	-11.0905	-261.692	-50.7357	-8.40333	-6.87144	173.787
329	-19.5829	-10.8484	46.9643	-18.9625	-11.0869	-261.136	-49.3353	-8.39392	-6.86026	166.084
330	-18.9252	-10.8239	44.7748	-18.4736	-11.0835	-260.653	-47.9904	-8.38452	-6.84908	158.746
331	-18.3133	-10.8003	42.6605	-18.0107	-11.0801	-260.246	-46.6988	-8.37512	-6.8379	151.751
332	-17.744	-10.7776	40.618	-17.5723	-11.0767	-259.921	-45.4582	-8.36572	-6.82672	145.082
333	-17.214	-10.7557	38.6443	-17.1572	-11.0734	-259.682	-44.2664	-8.35632	-6.81553	138.72
334	-16.7204	-10.7345	36.7364	-16.7638	-11.0701	-259.535	-43.1214	-8.34692	-6.80435	132.649
335	-16.2606	-10.7142	34.8917	-16.391	-11.0669	-259.485	-42.0211	-8.33752	-6.79316	126.853
336	-15.8322	-10.6945	33.1073	-16.0376	-11.0637	-259.539	-40.9639	-8.32812	-6.78197	121.318
337	-15.4327	-10.6756	31.3809	-15.7024	-11.0605	-259.705	-39.9477	-8.31872	-6.77078	116.03
338	-15.0602	-10.6572	29.7101	-15.3846	-12.8745	-259.991	-38.971	-8.30931	-6.7596	110.975
339	-14.7126	-10.6395	28.0926	-15.083	-12.7719	-260.406	-38.032	-8.2999	-6.7484	106.142
340	-14.3883	-10.6224	26.5262	-14.7968	-12.6753	-260.962	-37.1293	-8.29048	-6.73721	101.52
341	-14.0854	-10.6058	25.009	278.714	-12.5843	-261.671	-36.2612	-8.28106	-6.72602	97.0962
342	-13.8026	-10.5897	-110.715	259.918	-12.4985	-262.547	-35.4264	-8.27164	-6.71482	92.8619
343	-13.5383	-10.5741	-106.64	242.459	-12.4177	-263.607	-34.6235	-8.26221	-6.70363	88.8072
344	-13.2912	-10.5591	-102.733	226.235	-12.3415	-264.869	-33.8512	-8.25277	-6.69243	84.923
345	-13.0602	-10.5444	-98.9874	211.15	-12.2696	-266.357	-33.1082	-8.24333	-6.68124	81.2008
346	-12.8441	-10.5302	-95.3981	197.119	-12.2017	-268.096	-32.3933	-8.23388	-6.67004	77.6326
347	-12.6419	-10.5164	-91.9587	184.062	-12.1376	-270.117	-31.7054	-8.22442	-6.65884	74.2108
348	-12.4525	-10.503	-88.6633	171.905	-12.0771	-272.458	-31.0433	-8.21495	-6.64764	70.9282
349	-12.2752	-10.49	-85.5063	160.582	-12.02	-275.164	-30.4061	-8.20548	-6.63644	67.7783
350	-12.109	-10.4773	-82.482	150.031	-11.966	-278.29	-29.7927	-8.19599	-6.62523	64.7545
351	-11.9532	-10.465	-79.585	140.195	-11.9149	-281.905	-29.2022	-8.1865	-6.61403	61.8509
352	-11.8071	-10.453	-76.81	131.021	-11.8667	-286.094	-28.6335	-8.17699	-6.60283	59.0618
353	-11.67	-10.4413	-74.1521	122.461	-11.821	-290.967	-28.086	-8.16748	-6.59162	56.3818
354	-11.5413	-10.4298	-71.6062	114.47	-11.7778	-296.666	-27.5586	-8.15796	-6.58042	53.8059
355	-11.4205	-10.4187	-69.1676	107.008	-11.7368	-303.382	-27.0506	-8.14842	-6.56921	51.3293
356	-11.3069	-10.4078	-66.8318	100.037	-11.6981	-311.373	-26.5613	-8.13888	-6.558	48.9474
357	-11.2002	-10.3972	-64.5943	93.5203	-11.6613	-321.006	-26.0898	-8.12932	-6.5468	46.656
358	-11.0998	-10.3868	-62.4509	87.4273	-11.6265	-332.818	-25.6356	-8.11976	-6.53559	44.451
359	-11.0054	-10.3766	-60.3975	81.7278	-11.5935	-347.636	-25.1978	-8.11018	-6.52438	42.3285
360	-10.9164	-10.3667	-58.4303	76.3942	-11.5622	-366.823	-24.7759	-8.10059	-6.51317	40.2849
361	-10.8327	-10.3569	-56.5454	71.401	-11.5324	-392.825	-24.3692	-8.09098	-6.50196	38.3168
362	-10.7537	-10.3474	-54.7392	66.7246	-11.5042	262.045	-23.9771	-8.08137	-6.49075	36.4208
363	-10.6793	-10.338	-53.0084	62.3434	-11.4774	259.607	-23.5991	-8.07174	-6.47954	34.5939
364	-10.609	-12.0591	-51.3496	58.2371	-11.4519	257.188	-23.2346	-8.0621	-6.46833	32.833
365	-10.5427	-11.9729	-49.7597	54.387	-11.4277	254.79	-22.8831	-8.05245	-6.45712	31.1355
366	-10.4801	-11.8913	-48.2356	50.7758	-11.4046	252.412	-22.5441	-8.04278	-6.44591	29.4986
367	-10.4209	-11.8141	-46.7744	47.3876	-11.3827	239.85	-22.2171	-8.0331	-6.43469	27.9198
368	-10.3649	-11.7408	-45.3734	44.2073	-11.3617	227.962	-21.9017	-8.02341	-6.42348	26.3968
369	-10.3119	-11.6714	-44.0299	41.2212	-11.3418	216.708	-21.5973	-8.0137	-6.41227	24.9271
370	-10.2618	-11.6055	-42.7413	38.4164	-11.3228	206.05	-21.3036	-8.00399	-6.40106	23.5087
371	-10.2142	-11.5431	-41.5054	35.7812	-11.3047	195.953	-21.0202	-7.99425	-6.38984	22.1395
372	-10.1692	-11.4838	-40.3197	33.3043	-11.2875	186.383	-20.7467	-7.9845	-6.37863	20.8175
373	-10.1264	-11.4274	-39.182	30.9756	-11.2709	177.309	-20.4827	-7.97474	-6.36742	19.5409
374	-10.0858	-11.374	-38.0903	28.7854	-11.2552	168.703	-20.2279	-7.96497	-6.35621	18.3078
375	-10.0472	-11.3231	-37.0425	26.7249	-11.2401	160.536	-19.9819	-7.95518	-6.34499	17.1165
376	-10.0105	-11.2748	-36.0367	24.7858	-11.2257	152.784	-19.7443	285.883	-6.33378	15.9655
377	-9.97557	-11.2288	-35.0711	22.9604	-11.2119	145.423	-19.5149	273.137	-6.32257	14.8532
378	-9.94231	-11.1851	-34.1438	21.2415	-11.1987	138.431	-19.2934	261.025	-6.31136	13.778
379	-9.91061	-11.1434	-33.2534	19.6224	-11.186	131.786	-19.0794	249.512	-6.30015	12.7387
380	-9.88036	-11.1037	-32.398	18.097	-11.1739	125.468	-18.8727	238.565	-6.28894	11.7338
381	-9.85149	-11.0659	-31.5763	16.6593	-11.1622	119.46	-18.6731	228.152	-6.27773	10.7621
382	-9.82391	-11.0299	-30.7867	15.3039	-11.151	113.745	-18.4802	218.244	-6.26652	9.82234
383	-9.79753	-10.9955	-30.0279	14.0258	-11.1402	108.305	-18.2938	208.813	-6.25531	8.91333
384	-9.77228	-10.9627	-29.2986	12.8203	-11.1299	103.126	-18.1137	199.833	-6.2441	8.03397
385	-9.74809	-10.9314	-28.5974	11.6829	-11.1199	98.193	-17.9397	191.28	-6.23289	7.18318
386	-9.7249	-10.9014	-27.9232	10.6096	-11.1104	93.4935	-17.7714	183.13	-6.22169	6.35993
387	-9.70265	-10.8728	-27.2748	9.59634	-11.1011	89.0144	-17.6088	175.362	-6.21048	5.56324
388	-9.68127	-10.8454	-26.6512	8.63968	-11.0922	84.744	-17.4516	167.955	-6.19928	4.79218
389	-9.66072	-10.8192	-26.0512	7.7362	-11.0836	80.6712	-17.2997	160.89	-6.18807	4.04583
390	-9.64094	-10.7942	-25.4738	6.88274	-11.0753	76.7855	-17.1527	154.15	-6.17687	3.32334
391	-9.62189	-10.7701	-24.9181	6.07635	-11.0673	73.077	-17.0107	147.716	-6.16567	2.62387
392	-9.60352	-10.7471	-24.3833	5.31425	-11.0595	69.5366	-16.8733	141.572	-6.15447	1.94664
393	-9.58579	-10.725	-23.8683	4.59386	-11.052	66.1556	-16.7404	135.705	-6.14327	1.29088
394	-9.56867	-10.7038	-23.3724	3.91274	-11.0448	62.9256	-16.6118	130.098	-6.13207	0.655867
395	-9.55211	-10.6834	-22.8948	3.26863	-11.0377	59.8391	-16.4875	124.739	-6.12088	0.0408944
396	-9.53609	-10.6638	-22.4346	2.65939	-11.0309	56.8887	-16.3673	119.616	-6.10968	-0.554708
397	-9.52056	-10.645	-21.9913	2.08301	-11.0242	54.0676	-16.2509	114.715	-6.09849	-1.13159
398	-9.50551	-10.6269	-21.5641	1.53761	-11.0177	51.3693	-16.1383	110.027	-6.08729	-1.69036
399	-9.4909	-10.6095	-21.1522	1.02145	-11.0115	48.7878	-16.0294	25.0771	-6.0761	-2.23163
400	-9.4767	-10.5927	-20.7552	0.532846	-11.0053	46.3173	-15.924	23.2567	-6.06492	-2.75596
401	-9.46289	-10.5765	-20.3723	0.0702602	-12.1563	43.9523	-15.8219	21.5405	-6.05373	-3.26391
402	-9.44946	-10.5609	-20.0031	-0.36777	-12.0855	41.6877	-15.7232	19.9218	-6.04254	-3.756
403	-9.43636	-10.5458	-19.6469	-0.782618	-12.0189	39.5187	-15.6276	18.3949	-6.03136	-4.23275
404	-9.42359	-10.5312	-19.3032	-1.17557	-11.9563	37.4407	-15.5351	16.9541	-6.02018	-4.69464
405	-9.41113	-10.5171	-18.9715	-1.54785	-11.8974	35.4493	-15.4455	15.5941	-6.009	-5.14215
406	-9.39896	-10.5035	-18.6513	-1.90058	-11.842	33.5405	-15.3588	14.3101	-5.99782	-5.57573
407	-9.38705	-10.4903	-18.3422	-2.23484	-11.7898	31.7104	-15.2749	13.0976	-5.98665	-5.99582
408	-9.37539	-10.4775	-18.0437	-2.55165	-11.7407	29.9554	-15.1936	11.9522	-5.97547	-6.40284
409	-9.36398	-10.4651	-17.7554	-2.85195	-11.6944	28.2718	-15.1149	10.87	-5.9643	-6.7972
410	-9.35279	-10.453	-17.4769	-3.13663	-11.6507	26.6566	-15.0386	9.84727	-5.95314	-7.17928
411	-9.34181	-10.4414	-17.2078	-3.40655	-11.6095	25.1065	-14.9648	8.88048	-5.94197	-7.54947
412	-9.33103	-10.43	-16.9477	-3.66248	-11.5707	23.6185	-14.8933	7.96638	-5.93081	-7.90813
413	-9.32043	-10.419	-16.6963	-3.90519	-11.534	22.19	-14.824	7.1019	-5.91965	-8.25561
414	-9.31	-10.4082	-16.4533	-4.13537	-11.4994	20.8182	-14.7569	6.28417	-5.90849	-8.59225
415	-9.29975	-10.3978	-16.2182	-4.3537	-11.4667	19.5005	-14.6919	5.51049	-5.89733	-8.91837
416	-9.28964	-10.3876	-15.9908	-4.56079	-11.4357	18.2347	-14.6289	4.77834	-5.88618	-9.2343
417	-9.27968	-10.3776	-15.7708	-4.75724	-11.4065	17.0184	-14.5679	4.08535	-5.87503	-9.54033
418	-9.26985	-10.3679	-15.558	-4.9436	-11.3788	15.8494	-14.5088	3.4293	-5.86389	-9.83676
419	-9.26016	-10.3584	-15.3519	-5.12041	-11.3526	14.7258	242.417	2.8081	-5.85274	-10.1239
420	-9.25058	-10.3492	-15.1525	-5.28816	-11.3277	13.6455	231.508	2.21978	-5.8416	-10.4019
421	-9.24111	-10.3401	-14.9594	-5.44731	-11.3042	12.6067	221.139	1.66252	-5.83047	-10.6712
422	-9.23175	-10.3313	-14.7723	-5.59832	-11.2818	11.6077	211.279	1.13458	-5.81933	-10.932
423	-9.22248	-10.3226	-14.5911	-5.7416	-11.2607	10.6466	201.899	0.634335	-5.8082	-11.1845
424	-9.21331	299.721	-14.4156	-5.87755	-11.2405	9.72206	192.972	0.160253	-5.79707	-11.429
425	-9.20422	281.67	-14.2454	-6.00654	-11.2214	8.8324	184.472	-0.289101	-5.78595	-11.6657
426	-9.19521	264.777	-14.0805	-6.12892	-11.2033	7.9762	176.376	-0.71508	-5.77483	-11.8948
427	-9.18628	248.962	-13.9206	-83.281	-11.186	7.15208	168.662	-1.11896	-5.76371	-12.1165
428	-9.17742	234.15	-13.7655	-79.0759	-11.1695	6.35872	161.309	-1.50193	-5.7526	-12.3311
429	-9.16862	220.273	-13.6151	-75.124	-11.1538	5.59485	154.296	-1.86513	-5.74149	-12.5388
430	-9.15989	207.265	-13.4691	-71.4094	-11.1389	4.85928	147.606	-2.20961	-5.73039	-12.7397
431	-9.15121	195.069	-13.3275	-67.9172	-11.1246	4.15086	141.22	-2.53639	-5.71929	-12.934
432	-9.14258	183.628	-13.1901	-64.6333	-11.111	3.4685	135.123	-2.84639	-5.70819	-13.122
433	-9.134	172.891	-13.0566	-61.5446	-11.098	2.81115	129.299	-3.14052	-5.69709	-13.3038
434	-9.12547	162.812	-12.927	-58.6389	-11.0856	2.17781	123.733	-3.41961	-5.68601	-13.4796
435	-9.11697	153.347	-12.8012	-55.9047	-11.0737	1.56754	118.413	-3.68445	-5.67492	-13.6495
436	-9.10852	144.454	-12.6789	-53.3313	-11.0623	0.979413	113.324	-3.93579	-5.66384	-13.8137
437	-9.1001	136.095	-96.1938	-50.9086	-11.0514	0.412571	108.456	-4.17433	-5.65276	-13.9724
438	-9.09172	128.236	-92.2796	-48.6274	-11.041	-0.133822	103.796	-4.40074	-5.64169	-14.1257
439	-9.08336	120.845	-88.5528	-46.4788	-11.0309	-0.660561	99.3347	-4.61565	-5.63062	-14.2738
440	-9.07503	113.889	-85.004	-44.4546	-11.0213	-1.16841	95.061	-4.81964	-5.61956	-14.4169
441	-9.06673	107.342	-81.6243	-42.5472	-11.012	-1.65809	90.9659	-5.01329	-5.6085	-14.5549
442	-9.05845	101.177	-78.4054	-40.7493	-11.0031	-2.13031	87.0403	-5.19711	-5.59745	-14.6882
443	-9.05019	95.3703	-75.3393	-39.0544	-10.9945	-2.58573	83.2758	-5.37161	-5.5864	-14.8168
444	-9.04195	89.898	-72.4182	-37.456	-10.9862	-3.02499	79.6645	-5.53726	-5.57535	-14.9409
445	-9.03372	84.7395	-69.6351	-35.9484	-10.9782	-3.4487	76.1989	-5.69451	-5.56431	-15.0605
446	-9.02551	79.875	-66.983	-34.5259	-10.9705	-3.85745	72.872	-5.84378	-5.55328	-15.1758
447	-9.01731	75.2863	-64.4554	-33.1836	-10.9631	-4.2518	69.6771	-5.98547	-5.54225	-15.287
448	-9.00913	70.9561	-62.0461	-31.9164	-10.9559	-4.63229	66.6078	-6.11996	-5.53123	-15.3941
449	-9.00095	66.8686	-59.7493	-30.72	-10.9489	-4.99944	63.6583	-6.24761	-5.52021	-15.4972
450	-8.99278	63.0088	-57.5593	-29.59	-10.9421	-5.35374	60.8229	-6.36876	-5.50919	-15.5964
451	-8.98462	59.3628	-55.4709	-28.5226	-10.9356	-5.69567	58.0963	-6.48373	-5.49819	-15.692
452	-8.97646	55.9177	-53.479	-27.514	-10.9292	-6.02568	55.4735	-6.59282	-5.48718	-15.7838
453	-8.96831	52.6613	-51.5789	-26.5607	-10.923	-6.34421	52.9497	-6.69632	-5.47619	-15.8722
454	-8.96016	49.5824	-49.7661	-25.6594	-10.917	-6.65169	50.5205	-6.79451	-5.46519	-15.957
455	-8.95201	46.6703	-48.0362	-24.8072	-10.9111	-6.9485	48.1816	-6.88764	-5.45421	-16.0386
456	-8.94386	43.9152	-46.3852	-24.0011	-10.9054	-7.23505	45.929	-6.97596	-5.44323	-16.1168
457	-8.93571	41.3078	-44.8092	-79.4595	-10.8998	-7.5117	43.7588	-7.0597	-5.43225	-16.1919
458	-8.92756	38.8395	-43.3046	-74.9001	-10.8944	-7.77881	41.6675	-7.13908	-5.42128	-16.2639
459	-8.91941	36.5021	-41.8679	-70.6546	-10.8891	-8.03673	39.6516	-7.21432	-5.41032	-16.3328
460	-8.91126	34.2881	-40.4958	-66.7003	-10.8839	-8.28578	37.7079	-7.28561	-5.39936	-16.3989
461	-8.9031	32.1904	-39.1852	-63.0161	-10.8788	-8.52628	35.8333	-7.35313	-5.38841	-16.4621
462	-8.89493	30.2022	-37.933	-59.5827	-10.8738	-8.75853	34.0248	-7.41707	-5.37747	-16.5225
463	-8.88676	28.3174	-36.7365	-56.382	-10.869	-8.98283	32.2798	-7.4776	-5.36653	-16.5802
464	-8.87858	26.53	-35.593	-53.3973	-10.8642	-9.19946	30.5954	-7.53488	-5.3556	-16.6354
465	-8.8704	24.8347	-34.4999	-50.6134	-10.8595	-9.40869	28.9694	-7.58906	-5.34467	-16.6879
466	-8.86221	23.2262	-33.4549	-48.0159	-10.8548	-9.61078	27.3992	-7.64028	-5.33375	-16.738
467	-8.85401	21.6997	-32.4557	-45.5917	-10.8503	-9.80599	25.8826	-7.6887	-5.32284	-16.7856
468	-8.8458	20.2506	-31.5	-43.3285	-10.8458	-9.99455	24.4174	-7.73442	-5.31193	-16.8309
469	-8.83758	18.8747	-30.5858	-41.2149	-10.8414	-10.1767	23.0017	-7.77759	-5.30103	-16.874
470	-8.82935	17.568	-29.7112	-39.2406	-10.8371	-10.3527	21.6333	-7.81832	-5.29014	-16.9147
471	-8.82111	16.3266	-28.8743	-37.3957	-10.8328	-10.5226	20.3106	-7.85673	-5.27925	-16.9534
472	-8.81286	15.1471	-28.0732	-35.6713	-10.8286	-10.6869	19.0316	-7.89291	-5.26837	-16.9899
473	-8.8046	14.026	-27.3065	-34.0591	-10.8244	-10.8455	17.7948	-7.92698	-5.2575	-17.0244
474	-8.79633	12.9603	-26.5724	-32.5512	-10.8202	-10.9988	16.5985	-7.95902	-5.24664	-17.0569
475	-8.78804	11.9469	-25.8694	-31.1406	-10.8162	-11.1469	15.4412	-7.98914	-5.23578	-17.0874
476	-8.77974	10.9831	-25.196	-29.8205	-10.8121	-11.2899	14.3214	-8.01741	-5.22493	-17.1161
477	-8.77143	10.0663	-24.551	-28.5847	-10.8081	-11.4282	13.2377	-8.04393	-5.21408	-17.1429
478	-8.76311	9.19393	-23.933	-27.4276	-10.8041	-11.5617	12.1887	-8.06878	-5.20325	-17.1679
479	-8.75477	8.36372	-23.3408	-26.3438	-10.8002	-11.6908	11.1733	-8.09202	-5.19242	-17.1913
480	-8.74641	7.57347	-22.7732	-25.3283	-10.7963	-11.8155	10.1902	-8.11373	-5.1816	-17.2129
481	-8.73805	226.617	-22.229	-24.3766	-10.7924	-11.936	9.23813	-8.13398	-5.17078	-17.2329
482	-8.72966	212.242	-21.7072	-23.4843	-10.7886	-12.0524	8.31609	-8.15284	-5.15998	-17.2513
483	-8.72127	198.816	-21.2069	-22.6476	-10.7847	-12.1649	7.42298	-8.17036	-5.14918	-17.2681
484	-8.71285	186.267	-20.7269	-21.8627	-10.7809	-12.2736	6.55779	-8.18662	-5.13838	-17.2835
485	-8.70443	174.529	-20.2665	-21.1262	-10.7772	-12.3787	5.71954	-8.20165	-5.1276	-17.2974
486	-8.69598	163.543	-19.8246	-20.4348	-10.7734	-12.4802	4.90729	-8.21553	-5.11683	-17.3098
487	-8.68752	153.255	-19.4006	-19.7857	-10.7697	-12.5782	4.12014	-8.22829	-5.10606	-17.3209
488	-8.67905	143.613	-18.9936	-19.1761	-10.7659	-12.673	3.35725	-8.23999	-5.0953	-17.3306
489	-8.67055	134.571	-18.6028	-18.6033	-10.7622	-12.7646	2.61777	-8.25068	-5.08455	-17.3391
490	-8.66205	126.086	-18.2275	-18.0651	-10.7585	-12.8531	1.90093	-8.2604	-5.0738	-17.3463
491	-8.65352	118.119	-17.8671	-17.5591	-10.7548	-12.9386	1.20597	-8.26919	-5.06307	-17.3522
492	-8.64498	110.634	-17.5209	-17.0833	-10.7512	-13.0213	0.532167	-8.2771	-5.05234	-17.3569
493	-8.63642	103.598	-17.1882	-16.6357	-10.7475	-13.1011	-0.121186	-8.28415	-5.04162	-17.3605
494	-8.62784	96.9788	-16.8686	-16.2146	-10.7438	-13.1783	-0.754753	-8.2904	-5.03091	-17.363
495	-8.61925	90.7488	-16.5613	-15.8182	-10.7402	-13.2528	-1.36918	-8.29587	-5.02021	-17.3644
496	-8.61064	84.8816	-16.2659	-15.445	-10.7365	-13.3249	-1.96508	-8.3006	-5.00951	-17.3647
497	-8.60201	79.3531	-15.9819	-15.0935	-10.7329	-13.3945	-2.54305	-8.30462	-4.99883	-17.3639
498	-8.59336	74.1407	-15.7087	-14.7624	-10.7292	-13.4618	-3.10365	-8.30796	-4.98815	-17.3622
499	-8.5847	69.2239	-15.446	-14.4503	-10.7256	-13.5268	-3.64745	-8.31066	-4.97748	-17.3595
500	-8.57601	64.5834	-15.1932	-14.1562	-10.722	-13.5897	-4.17496	-8.31273	-4.96683	-17.3559
501	-8.56731	60.2015	-14.9499	-13.8788	-10.7184	-13.6504	-4.6867	-8.31421	-4.95618	-17.3513
502	-8.5586	56.0618	-14.7158	-13.6171	-10.7147	-13.709	-5.18314	-8.31512	-4.94553	-17.3459
503	-8.54986	52.1489	-14.4904	-13.3702	-10.7111	-13.7657	-5.66478	-8.31549	-4.9349	-17.3396
504	-8.5411	48.4488	-14.2734	-13.1371	-10.7075	-13.8205	-6.13204	-8.31533	-4.92428	-17.3325
505	-8.53233	44.9482	-14.0644	-12.917	-10.7038	-13.8734	-6.58538	-8.31468	-4.91367	-17.3246
506	-8.52354	41.6351	-13.8631	-12.7092	-10.7002	-13.9246	-7.02522	-8.31355	-4.90306	-17.3159
507	-8.51473	38.498	-13.6692	-12.5128	-10.6966	-13.974	-7.45196	-8.31197	-4.89247	-17.3064
508	-8.5059	35.5264	-13.4823	-12.3271	-10.6929	-14.0217	-7.86598	-8.30994	-4.88188	-17.2962
509	-8.49705	32.7105	-13.3022	-12.1516	-10.6893	-14.0679	-8.26768	-8.3075	-4.8713	-17.2853
510	-8.48818	30.041	-13.1285	-11.9856	-10.6856	-14.1125	-8.6574	-8.30466	-4.86073	-17.2737
511	-8.4793	27.5095	-12.9611	-11.8285	-10.682	-14.1556	-9.03551	-8.30144	-4.85018	-17.2615
512	-8.4704	25.108	-12.7997	-11.6799	-10.6783	-14.1972	-9.40234	-8.29785	-4.83963	-17.2486
513	-8.46147	22.829	-12.6439	-11.5391	-10.6746	-14.2374	-9.75822	-8.29391	-4.82909	-17.235
514	-8.45253	20.6656	-12.4937	-11.4058	-10.671	-14.2763	-10.1035	-8.28963	-4.81856	-17.2209
515	-8.44357	18.6113	-12.3487	-11.2795	-10.6673	-14.3139	-10.4384	-8.28503	-4.80804	-17.2062
516	-8.43459	16.6601	-12.2087	-11.1597	-10.6636	-14.3502	-10.7633	-8.28012	-4.79753	-17.191
517	-8.42559	14.8062	-12.0736	-11.0462	-10.6599	-14.3852	-11.0784	-8.27492	-4.78703	-17.1752
518	-8.41657	13.0443	-11.9431	-10.9385	-10.6562	-14.4191	-11.384	-8.26944	-4.77654	-17.1589
519	-8.40754	11.3695	-11.8171	-10.8363	-10.6525	-14.4519	-11.6805	-8.26368	-4.76606	-17.142
520	-8.39848	9.77702	-11.6954	-10.7393	-10.6488	-14.4835	-11.968	-8.25767	-4.75559	-17.1247
521	-8.38941	8.26251	-11.5778	-10.6472	-10.6451	-14.5141	-12.2467	-8.25141	-4.74513	-17.1069
522	-8.38031	6.82184	-11.4641	-10.5596	-10.6413	-14.5437	-12.5171	-8.24491	-4.73468	-17.0887
523	-8.3712	5.45116	-11.3543	-10.4764	-10.6376	-14.5722	-12.7792	-8.23818	-4.72424	-17.07
524	-8.36207	4.14681	-11.248	-10.3973	-10.6338	-14.5998	-13.0333	-8.23123	-4.71382	-17.0509
525	-8.35292	2.90538	-11.1453	-10.3221	-10.6301	-14.6265	-13.2796	-8.22408	-4.7034	-17.0314
526	-8.34374	1.72364	-11.0459	-10.2504	-10.6263	-14.6523	-13.5183	-8.21673	-4.69299	-17.0115
527	-8.33456	0.598578	-10.9498	-10.1822	-10.6225	-14.6772	-13.7497	-8.20918	-4.68259	-16.9913
528	-8.32535	-0.472671	-10.8567	-10.1173	-10.6187	-14.7013	-13.9739	-8.20146	-4.67221	-16.9707
529	-8.31612	-1.4928	-10.7667	-10.0554	-10.6149	-14.7246	-14.1911	-8.19356	-4.66183	-16.9497
530	-8.30687	-2.46434	-10.6795	-9.99638	-10.6111	-14.7471	-14.4015	-8.18549	-4.65146	-16.9284
531	-8.29761	-3.38968	-10.595	-9.94009	-10.6073	-14.7688	-14.6054	-8.17726	-4.64111	-16.9068
532	-8.28832	-4.27109	-10.5133	-9.88638	-10.6034	-14.7899	-14.8028	-8.16887	-4.63076	-16.8849
533	-8.27902	-5.1107	-10.434	-9.83509	-10.5996	-14.8102	-14.9939	-8.16034	-4.62043	-16.8627
534	-8.26969	-5.91052	-52.167	-9.78609	-10.5957	-14.8299	-15.1789	-8.15167	-4.61011	-16.8402
535	-8.26035	-6.67247	-50.1978	-9.73927	-10.5918	-14.8489	-15.358	-8.14287	-4.5998	-16.8174
536	-8.25099	-7.39833	-48.3257	-9.6945	-10.5879	-14.8673	-15.5313	-8.13393	-4.5895	-16.7944
537	-8.24161	-8.08982	-46.5454	-9.65166	-10.584	-14.885	-15.699	-8.12487	-4.57921	-16.7711
538	-8.23221	-8.74855	-44.8522	-9.61065	-10.5801	-14.9022	-15.8612	-8.1157	-4.56893	-16.7476
539	-8.22279	-9.37605	-43.2415	-9.57138	-10.5762	-14.9189	-16.0181	-8.10641	-4.55866	-16.7239
540	-8.21335	-9.97376	-41.7089	-9.53375	-10.5722	-14.935	-16.1697	-8.09701	-4.5484	-16.7
541	-8.20389	-10.5431	-40.2504	-9.49766	-10.5683	-14.9505	-16.3163	-8.08751	-4.53816	-16.6759
542	-8.19442	-11.0853	-38.8621	-9.46304	-10.5643	-14.9656	-16.4579	-8.07791	-22.8598	-16.6516
543	-8.18492	-11.6016	-37.5404	-9.42981	-10.5603	-14.9802	-16.5948	-8.06821	-22.4749	-16.6271
544	-8.17541	-12.0932	-36.2818	-9.39789	-10.5564	-14.9943	-16.7269	-8.05843	-22.101	-16.6024
545	-8.16588	-12.5612	-35.0831	-9.36722	-10.5523	-15.0079	-16.8545	-8.04855	-21.7375	-16.5776
546	-8.15632	-13.0067	-33.9413	-9.33772	-10.5483	-15.0212	-16.9776	-8.0386	-21.3843	-16.5526
547	-8.14675	-13.4306	-32.8533	-9.30933	-10.5443	-15.034	-17.0963	-8.02857	-21.041	-16.5275
548	-8.13717	-13.834	-31.8165	-9.282	-10.5402	-15.0464	-17.2109	-8.01846	-20.7072	-16.5022
549	-8.12756	-14.2177	-30.8283	-9.25567	-10.5362	-15.0584	-17.3213	-8.00827	-20.3827	-16.4769
550	-8.11793	-14.5826	-29.8861	-9.23028	-10.5321	-15.0701	-17.4277	-7.99802	-20.0672	-16.4514
551	-8.10829	-14.9295	244.556	-9.20579	-10.528	-15.0813	-17.5302	-7.9877	-19.7603	-16.4258
552	-8.09862	-15.2592	229.304	-9.18215	-10.5239	-15.0923	-17.6288	-7.97732	-19.4619	-16.4001
553	-8.08894	-15.5724	215.059	-9.15932	-10.5198	-15.1029	-17.7238	-7.96688	-19.1717	-16.3742
554	-8.07924	-15.8699	201.75	-9.13724	-10.5157	-15.1132	-17.8151	-7.95638	-18.8893	-16.3484
555	-8.06952	-16.1523	189.309	-9.11589	-10.5115	-15.1232	-17.9029	-7.94583	-18.6146	-16.3224
556	-8.05978	-16.4203	177.675	-9.09523	-10.5073	-15.1328	-17.9872	-7.93522	-18.3474	-16.2964
557	-8.05002	-16.6744	166.789	-9.07522	-10.5032	-15.1423	-18.0681	-7.92456	-18.0873	-16.2702
558	-8.04025	-16.9153	156.6	-9.05582	-10.499	-15.1514	-18.1458	-7.91386	-17.8341	-16.2441
559	-8.03045	-17.1435	147.059	-9.037	-10.4948	-15.1602	-18.2203	-7.90311	-17.5877	-16.2179
560	-8.02064	-17.3596	138.12	-9.01874	-10.4906	-15.1689	-18.2916	-7.89231	-17.3479	-16.1916
561	-8.01081	-17.564	129.742	-9.001	-10.4863	-15.1772	-18.36	-7.88148	-17.1144	-16.1653
562	-8.00096	-17.7573	121.886	-8.98376	-10.4821	-15.1854	-18.4253	-7.8706	-16.887	-16.139
563	-7.99109	-17.9399	114.516	-8.967	-10.4778	-15.1933	-18.4878	-7.85969	-16.6656	-16.1126
564	-7.98121	-18.1122	107.6	-8.95068	-10.4735	-15.201	-18.5474	-7.84874	-16.45	-16.0862
565	-7.97131	-18.2748	101.106	-8.93479	-10.4692	-15.2085	-18.6043	-7.83775	-16.2399	-16.0598
566	-7.96138	-18.4278	95.0068	-8.91929	-10.4649	-15.2158	-18.6585	-7.82673	-16.0353	173.825
567	-7.95144	-18.5719	89.2755	-8.90419	-10.4606	-15.2229	-18.7101	-7.81569	-15.836	167.795
568	-7.94149	-18.7073	83.8879	-8.88944	-10.4562	-15.2299	-18.7592	-7.80461	-29.547	161.982
569	-7.93151	-18.8344	78.8213	-8.87504	-10.4519	-15.2366	-18.8058	-7.7935	-28.7475	156.377
570	-7.92152	-18.9535	74.0547	-8.86096	-10.4475	-15.2432	-18.8499	-7.78237	-27.9816	150.968
571	-7.91151	-19.065	69.5686	-8.8472	-10.4431	-15.2497	-18.8917	-7.77121	-27.248	145.745
572	-7.90148	-19.1691	65.345	-8.83373	-10.4387	-15.2559	-18.9312	-7.76002	-26.5451	140.7
573	-7.89143	-19.2662	61.367	-8.82053	-10.4343	-15.2621	-18.9684	-7.74882	-25.8714	135.823
574	-7.88137	-19.3565	57.6189	-8.80761	-10.4299	-15.2681	-19.0035	-7.73759	-25.2257	131.107
575	-7.87128	-19.4403	54.0861	-8.79493	-10.4254	-15.274	-19.0364	-7.72634	-24.6068	126.542
576	-7.86118	-19.518	50.7552	-8.78249	-10.4209	-15.2797	-19.0672	-7.71507	-24.0133	122.122
577	-7.85107	-19.5896	47.6136	-8.77027	-10.4165	-15.2853	-19.096	-7.70378	-23.4441	117.84
578	-7.84093	-19.6555	44.6493	-8.75827	-10.412	-15.2909	-19.1229	-7.69247	-22.8982	113.688
579	-7.83078	-19.716	41.8516	-8.74647	-10.4074	-15.2963	-19.1478	-7.68115	-22.3745	109.66
580	-7.82061	-19.7711	39.2101	-8.73487	-10.4029	-15.3016	-19.1708	-7.66981	-21.872	105.75
581	-7.81042	-19.8212	36.7154	-8.72344	-10.3984	-15.3068	-19.192	-7.65846	-21.3898	101.952
582	-7.80022	-19.8664	34.3585	-8.71219	-10.3938	-15.3119	-19.2114	-7.64709	-20.9269	98.2608
583	-7.79	-19.9069	32.1312	-8.70111	-10.3892	-15.3169	-19.2291	-7.63571	-20.4826	94.6703
584	-7.77976	-19.9429	30.0257	-8.69017	-10.3846	-15.3218	-19.245	-7.62431	-20.0559	91.1756
585	-7.7695	-19.9747	28.0348	-8.67939	-10.38	-15.3267	-19.2594	-7.6129	-19.6461	87.772
586	-7.75923	-20.0023	26.1516	-8.66874	-10.3754	-15.3314	-19.2721	-7.60148	-19.2526	84.4547
587	-7.74894	-20.0259	24.3699	-8.65823	-10.3708	-15.3362	-19.2832	-7.59005	-18.8744	81.2192
588	-7.73863	-20.0457	22.6837	-8.64784	-10.3661	-15.3408	-19.2928	-7.57861	-18.5111	78.0611
589	-7.72831	-20.0619	21.0874	-8.63757	-10.3614	-15.3454	-19.301	-7.56716	-27.3994	74.9765
590	-7.71797	-20.0745	19.576	-8.62741	-10.3567	-15.3499	-19.3077	-7.5557	-26.4846	71.9612
591	-7.70761	-20.0838	225.351	-8.61735	-10.352	-15.3543	-19.3129	-7.54424	-25.6198	69.0113
592	-7.69724	-20.0899	209.792	-8.6074	-10.3473	-15.3587	-19.3168	-7.53276	-24.802	66.1232
593	-7.68685	-20.0928	195.33	-37.3478	-10.3426	-15.363	-19.3194	-7.52128	-24.0285	63.2933
594	-7.67644	-20.0928	181.876	-35.9047	-10.3378	-15.3673	-19.3206	-7.50979	-23.2967	60.518
595	-7.66602	-20.0899	169.351	-34.5409	-10.333	-15.3716	-19.3206	-7.49829	-22.6042	57.7939
596	-7.65558	-20.0843	157.68	-33.2517	-10.3282	-15.3758	-19.3194	-7.48679	-21.9487	55.1176
597	-7.64512	-20.076	146.798	-32.0327	-10.3234	-15.38	-19.3169	-7.47528	-21.3281	52.4859
598	-7.63465	-20.0652	136.643	-30.8799	-10.3186	-15.3841	-19.3133	-7.46377	-20.7403	49.8955
599	-7.62416	-20.052	127.16	-29.7894	-10.3138	-15.3882	-19.3085	-7.45225	-20.1836	47.3432
600	-7.61366	-20.0365	118.297	-28.7575	-10.3089	-15.3922	-19.3027	-7.44073	-19.656	44.8259
601	-7.60314	-20.0188	110.008	-27.7809	-10.3041	-15.3963	-19.2957	-7.4292	-19.1561	42.3403
602	-7.5926	-19.9989	102.25	-26.8565	-10.2992	-15.4003	-19.2877	-7.41767	-18.6821	39.8833
603	-7.58205	-19.9769	94.9837	-25.9811	299.93	-15.4042	-19.2787	-7.40614	-18.2327	37.4516
604	-7.57148	-19.953	88.1739	-25.152	286.189	-15.4082	-19.2687	-7.3946	-17.8065	35.0421
605	-7.5609	-19.9273	81.7874	-24.3666	273.144	-15.4121	-19.2577	-7.38306	-17.4021	32.6514
606	-7.5503	-19.8997	75.7939	-23.6224	260.757	-15.416	-19.2458	-7.37151	-17.0184	30.2761
607	-7.53968	-19.8704	70.1657	-22.917	248.989	-15.4199	-19.233	-7.35997	-16.6542	27.9127
608	-7.52905	-19.8395	64.8772	-22.2483	237.808	-15.4238	-19.2193	-7.34842	-16.3084	25.5576
609	-7.5184	-19.8069	59.905	-21.6142	227.18	-15.4277	-19.2047	-7.33687	-15.98	23.2068
610	-7.50774	-19.7729	55.2275	-21.0128	217.074	-15.4315	-19.1893	-7.32531	-15.6681	20.8565
611	-7.49706	-19.7374	50.8247	-20.4422	207.461	-15.4353	-19.1731	-7.31376	-15.3717	18.5022
612	-7.48637	-19.7005	46.6783	-19.9007	198.316	-15.4392	-19.1561	-7.3022	-15.09	16.1394
613	-7.47566	-19.6623	42.7713	-19.3868	189.611	-15.443	-19.1384	-7.29065	-14.8222	13.7631
614	-7.46494	-19.6229	39.0879	-18.8988	181.323	-15.4468	-19.1199	-7.27909	-14.5676	11.3678
615	-7.4542	-19.5822	35.6138	-18.4355	173.43	-15.4506	-19.1006	-7.26753	-14.3253	96.8234
616	-7.44345	-19.5404	32.3354	-17.9953	165.91	-15.4543	-19.0807	-7.25597	-14.0949	88.3893
617	-7.43268	-19.4975	29.2404	-17.5771	158.743	-15.4581	-19.0601	-7.24441	-13.8755	79.9625
618	-7.4219	-19.4535	26.3173	-17.1797	151.911	-15.4619	-19.0389	-7.23285	-13.6668	71.5002
619	-7.4111	-19.4085	23.5554	-16.8019	145.395	-15.4657	-19.017	-7.22129	-13.4679	62.9542
620	-7.40029	-19.3626	20.9447	-16.4427	139.179	-15.4694	-18.9945	-7.20973	-13.2786	54.2694
621	-7.38946	-19.3157	18.4761	-16.101	133.247	-15.4732	-18.9714	-7.19816	-13.0981	45.381
622	-7.37862	-19.268	16.141	-15.776	127.585	-15.477	-18.9477	-7.1866	-12.9262	36.2111
623	-7.36776	-19.2195	13.9314	-15.4667	122.178	-15.4807	-18.9235	-7.17504	-12.7622	26.6637
624	-7.35689	-19.1702	11.8399	-15.1724	117.013	-15.4845	-18.8987	-7.16348	-12.6059	16.6175
625	-7.346	-19.1201	9.85959	-14.8921	112.078	-15.4883	-18.8734	-7.15192	-12.4568	5.91414
626	-7.33511	-19.0693	7.98404	-14.6253	107.361	-15.4921	150.901	-7.14036	-12.3145	-5.65914
627	-7.32419	-19.0179	6.20722	-14.371	102.852	-15.4958	145.206	-7.1288	-12.1787	-18.3996
628	-7.31327	-18.9658	-132.863	-14.1288	98.5383	-15.4996	139.711	-7.11724	-12.049	-32.7406
629	-7.30232	-18.9131	-125.658	-13.898	94.4118	-15.5034	134.407	-7.10568	-11.9252	-49.3493
630	-7.29137	-18.8599	-118.894	-13.6779	90.4627	-15.5072	129.282	-7.09412	-11.8069	-69.3254
631	-7.2804	-18.8061	-112.548	-13.4681	86.6824	-15.5109	124.327	-7.08256	-11.6938	-94.6563
632	-7.26942	-18.7518	-106.593	-13.268	83.0624	-15.5147	119.534	-7.071	-11.5857	383.824
633	-7.25842	-18.697	-101.007	-13.077	79.595	-15.5185	114.893	-7.05945	-11.4824	380.431
634	-7.24741	-18.6418	-95.7662	-12.8948	76.2728	-15.5223	110.396	-7.04789	-11.3835	377.065
635	-7.23639	-18.5862	-90.8499	-12.7208	73.0887	-15.5261	106.036	-7.03634	-11.2889	373.726
636	-7.22535	-18.5301	-86.2379	-12.5547	70.0362	-15.5299	101.805	-7.02479	-11.1983	370.415
637	-7.2143	-18.4737	-81.9111	-12.396	67.109	-15.5337	97.6956	-7.01323	-11.1116	355.802
638	-7.20324	-18.417	-77.8516	-12.2444	64.3012	-15.5376	93.7021	-7.00168	-11.0285	341.858
639	-7.19216	-18.3599	-74.0424	-12.0996	61.6071	-15.5414	89.8176	-6.99013	-10.9489	328.546
640	-7.18107	-18.3025	-70.4677	-11.9611	59.0216	-15.5452	86.0361	-6.97858	-10.8726	315.832
641	-7.16997	-18.2449	-67.1124	-11.8286	56.5395	-15.549	82.3517	-6.96703	-10.7994	303.685
642	-7.15885	-18.187	-63.9627	-11.7019	54.1561	-15.5529	78.7588	-6.95549	-10.7292	292.074
643	-7.14772	-18.1288	-61.0053	-11.5807	51.8669	-15.5567	75.2521	-6.94394	-10.6618	153.26
644	-7.13658	-18.0705	-58.2279	-11.4647	49.6675	-15.5606	71.8263	-6.9324	-10.5971	142.252
645	-7.12543	-18.0119	-55.6191	-11.3536	47.5541	-15.5644	68.4764	-6.92085	-10.535	132.032
646	-7.11426	-17.9532	-53.168	-11.2472	45.5226	-15.5683	65.1977	-6.90931	-10.4753	122.537
647	-7.10308	-17.8943	-50.8645	-11.1453	-48.985	-15.5722	61.9855	-6.89777	-10.4179	113.711
648	-7.09189	-17.8352	-48.6992	-11.0476	-47.1296	-15.576	58.8352	-6.88623	-10.3627	105.504
649	-7.08068	-17.7761	-46.6633	-10.954	-45.3699	-15.5799	55.7423	-6.87469	-10.3096	97.8669
650	-7.06947	-17.7168	-44.7484	-10.8642	-43.7007	-15.5838	52.7024	-6.86316	-10.2586	90.7577
651	-7.05824	-17.6574	-42.947	-10.778	-42.117	-15.5877	49.7113	-6.85162	-10.2094	84.1361
652	-7.047	-17.598	-41.2517	-10.6954	-40.6141	-15.5916	46.7647	-6.84009	-10.162	77.9659
653	-7.03575	-17.5384	-39.6558	-10.616	-39.1877	-15.5955	43.8584	-6.82855	-10.1164	72.2133
654	-7.02448	-17.4789	-38.1531	-10.5398	-37.8335	-15.5994	40.9881	-6.81702	-10.0724	66.8477
655	-7.01321	-17.4193	-36.7376	-10.4666	-36.5477	-15.6033	38.1495	-6.80549	-10.0299	61.8406
656	-7.00192	-17.3596	-35.4039	-10.3963	-35.3265	-15.6072	35.3384	-6.79396	-9.98897	57.166
657	-6.99062	-17.3	-34.1468	-10.3286	-34.1664	-15.6111	32.5503	-6.78244	-9.94944	52.7999
658	-6.97931	-17.2403	-32.9615	-10.2636	177.756	-15.615	29.7807	-6.77091	-9.91125	48.7201
659	-6.96798	-17.1806	-31.8436	-10.201	165.536	-15.619	27.025	-6.75938	-9.87436	44.9062
660	-6.95665	-17.121	-30.7887	-10.1408	154.164	-15.6229	24.2784	-6.74786	-9.83869	-45.6562
661	-6.94531	-17.0614	-29.7932	-10.0829	143.572	-15.6268	21.5356	-6.73634	-9.8042	-43.2584
662	-6.93395	-17.0019	-28.8531	-10.027	133.702	-15.6307	18.7913	-64.3618	-9.77082	-41.0484
663	-6.92258	-16.9423	-27.9652	-9.97324	124.498	-15.6347	16.0398	-62.5186	-9.7385	-39.0107
664	-6.9112	-16.8829	-27.1263	-9.92139	115.91	-15.6386	13.2749	-60.7416	-9.70721	-37.1312
665	-6.89981	-16.8235	-26.3333	-9.87139	107.891	-15.6425	10.4897	-59.0283	-9.67687	-35.397
666	-6.88841	-16.7642	-25.5834	-9.82316	100.4	-15.6464	7.67702	-57.3764	-9.64747	-33.7963
667	-6.877	-16.705	-24.874	-9.77661	93.3966	-15.6504	4.82853	-55.7833	-9.61894	-32.3182
668	-6.86558	-16.6459	-24.2027	-9.73167	86.846	-15.6543	1.93514	-54.2469	-9.59125	-30.9529
669	-6.85415	-16.5868	-23.5672	-9.68827	80.7154	-15.6582	-1.01346	-52.7649	-9.56437	-29.6913
670	-6.84271	-16.5279	-22.9653	-9.64633	74.9746	-15.6622	-4.029	-51.3354	-9.53825	-28.5251
671	-6.83125	-16.4691	-22.3951	-9.60578	69.5959	-15.6661	-7.12502	-49.9562	-9.51286	-27.4466
672	-6.81979	-16.4104	-21.8545	-9.56657	64.5538	-15.67	-10.3173	-48.6254	-9.48817	-26.449
673	-6.80832	-16.3519	-21.342	-9.52863	59.8248	-15.6739	-13.6243	-47.3413	-9.46415	-25.5258
674	-6.79683	-16.2935	-20.8558	-9.4919	55.3873	-15.6779	-17.0681	-46.102	-9.44076	-24.6712
675	-6.78534	-16.2352	-20.3943	-9.45633	51.2213	-15.6818	-20.6756	-44.9058	-9.41798	-23.8798
676	-6.77384	-16.1771	-19.9562	-9.42187	47.3083	-15.6857	-24.4793	-43.7511	-9.39577	-23.1466
677	-6.76232	-16.1191	-19.54	-9.38847	43.6314	-15.6896	-28.5202	-42.6363	-9.37412	-22.4672
678	-6.7508	-16.0613	-19.1446	-9.35608	40.1748	-15.6935	-32.8499	-41.5599	-9.353	-21.8374
679	-6.73927	-16.0037	-18.7686	-9.32466	36.9239	-15.6974	-37.5356	-40.5205	-9.33239	-21.2533
680	-6.72773	-15.9462	-18.4111	-9.29415	33.8653	-15.7013	-42.6662	-39.5167	-9.31225	-20.7115
681	-6.71618	-15.8889	-18.0708	-9.26453	30.9864	-15.7052	-48.3631	-38.5471	-9.29258	-20.2088
682	-6.70462	-15.8318	-17.7469	-9.23575	28.2757	-15.7091	-54.7977	-37.6104	-9.27335	-19.7421
683	-6.69305	-15.7749	-17.4384	-9.20778	25.7225	-15.713	-62.2226	-36.7055	-9.25453	-19.3088
684	-6.68147	-15.7181	-17.1445	-9.18057	23.3167	-15.7168	-71.0292	-35.8311	-9.23612	-18.9063
685	-6.66988	-15.6616	-16.8643	-9.1541	21.0491	-15.7207	-81.8688	-34.9862	-9.21809	-18.5324
686	-6.65828	-15.6052	-16.5971	-9.12833	18.9112	-15.7246	-95.9302	-34.1696	-9.20043	-18.1849
687	-6.64668	-15.549	-16.3421	-9.10323	16.8947	-15.7284	139.457	-33.3802	-9.18312	-17.8618
688	-6.63506	-15.4931	-16.0987	-9.07878	14.9925	-15.7323	137.995	-32.6171	-9.16615	-17.5614
689	-6.62344	-15.4373	-15.8662	-9.05494	13.1974	-15.7361	136.545	-31.8794	-9.14949	-17.282
690	-6.61181	-15.3818	-15.644	-9.03169	11.503	-15.7399	135.108	-31.166	-9.13314	-17.022
691	-6.60017	-15.3265	-15.4316	-9.009	9.90325	-15.7437	133.683	-30.4761	-9.11709	-16.78
692	-6.58852	-15.2713	-15.2285	-8.98685	8.39257	-15.7475	127.873	-29.8088	-9.10131	-16.5548
693	-6.57686	-15.2164	-15.0341	-8.96521	6.96567	-15.7513	122.324	-29.1634	-9.0858	-16.3451
694	-6.56519	-15.1618	-14.848	-8.94407	5.61765	-15.7551	117.023	-28.539	-9.07055	-16.1499
695	-6.55352	-15.1073	-14.6697	-8.9234	4.3439	-15.7588	111.957	-27.9348	-9.05554	-15.968
696	-6.54184	-15.0531	-14.4988	-8.90317	3.14014	-15.7626	107.115	-27.3501	-9.04076	-15.7986
697	-6.53015	-14.9991	-14.3349	-8.88338	2.00234	-15.7663	102.486	-26.7843	-9.02621	-15.6407
698	-6.51845	-14.9453	-14.1777	-8.864	0.926755	-15.77	98.0589	-26.2367	-9.01187	-15.4936
699	-6.50675	-14.8917	-14.0268	-8.84501	-0.0901539	-15.7737	93.8239	-25.7065	-8.99773	-15.3564
700	-6.49504	-14.8384	-13.8819	-8.82641	-1.05169	-15.7774	89.7716	-25.1932	-8.98379	-15.2286
701	-6.48332	-14.7853	-13.7427	-8.80816	-1.96094	-15.7811	85.8932	-24.6962	-8.97003	-15.1095
702	-6.47159	-14.7325	-13.6088	-8.79026	-2.82082	-15.7848	82.1803	-24.2149	-8.95645	-14.9984
703	-6.45986	-14.6799	-13.4801	-8.77269	-3.63405	-15.7884	78.6249	-23.7487	-8.94305	-14.8948
704	-6.44812	-14.6275	-13.3562	-8.75544	-4.4032	-15.7921	75.2195	-23.2972	-8.9298	-14.7983
705	-6.43637	-14.5754	-13.2369	-8.73849	-5.13067	-15.7957	71.9569	-22.8597	-8.91671	-14.7082
706	-6.42461	-14.5235	-13.122	-8.72183	-5.81872	-15.7993	68.8304	-22.4359	-13.8796	-14.6243
707	-6.41285	-14.4719	-13.0112	-8.70545	-130.205	-15.8028	65.8336	-22.0252	-13.6641	-14.5461
708	-6.40108	-14.4205	-12.9044	-8.68934	-123.138	-15.8064	62.9604	-21.6271	-13.4592	-14.4731
709	-6.38931	-14.3693	-12.8013	-8.67348	-116.505	-15.8099	60.205	-21.2413	-18.0761	-14.4051
710	-6.37752	-14.3184	-12.7018	-8.65786	-110.28	-15.8135	57.562	-20.8673	-17.5597	-14.3418
711	-6.36573	-14.2677	-12.6057	-8.64248	-104.438	-15.817	55.0262	-20.5047	289.514	-14.2828
712	-6.35394	-14.2173	-12.5129	-8.62732	-98.9564	-15.8204	52.5927	-20.1531	265.771	-14.2278
713	-6.34214	-14.1672	-12.4231	-8.61238	-93.8122	-15.8239	50.2567	-19.8121	244.041	-14.1766
714	-6.33033	-14.1172	-12.3362	-8.59764	-88.9846	-15.8273	48.014	-19.4814	224.145	-14.129
715	-6.31852	-14.0676	-12.2522	-8.5831	-84.4536	-15.8308	45.8602	-19.1606	205.917	-14.0847
716	-6.3067	-14.0182	-12.1707	-8.56874	-80.2008	-15.8341	43.7915	-18.8493	189.209	-14.0435
717	-6.29487	-13.969	-12.0919	-8.55456	-76.2085	-15.8375	41.8039	-18.5473	173.887	-14.0052
718	-6.28304	-13.9201	-12.0154	-8.54056	-72.4602	-15.8409	39.8939	-18.2543	159.829	-13.9696
719	-6.2712	-13.8714	-11.9413	-8.52672	-68.9405	-15.8442	38.0581	-17.9699	146.923	-13.9366
720	-6.25936	-13.823	-11.8693	-8.51304	-65.635	-15.8475	36.2932	-17.6938	135.071	-13.906
721	-6.24751	-13.7748	-11.7994	-8.49951	-62.53	-15.8508	34.596	-17.4258	124.179	-13.8777
722	-6.23566	-13.7269	-11.7316	-8.48612	-59.6127	-15.854	32.9637	-17.1656	114.166	-13.8515
723	-6.2238	-13.6792	-11.6657	-8.47287	-56.8714	-15.8572	31.3935	-16.9129	104.957	-13.8273
724	-6.21194	-13.6318	-11.6016	-8.45976	-54.2948	-15.8604	29.8827	-16.6675	96.4821	-13.8049
725	-6.20007	-13.5847	-11.5392	-8.44677	-51.8725	-15.8636	28.4286	-16.4292	88.6797	-13.7843
726	-6.18819	-13.5377	-11.4785	-8.4339	-49.5947	-15.8668	27.029	-16.1976	81.4931	-13.7654
727	-6.17631	-13.4911	-11.4194	-8.42114	-47.4523	-15.8699	25.6815	-15.9726	74.8705	-13.748
728	-6.16443	-13.4447	-11.3619	-8.4085	-45.4368	-15.873	24.3839	-15.754	68.7651	-13.7321
729	-6.15254	-13.3985	-11.3058	-8.39596	-43.5401	-15.876	23.1341	-15.5416	63.1338	-13.7176
730	-6.14065	-13.3526	-11.2511	-8.38353	-41.7549	-15.8791	21.9302	-15.3351	57.9376	-13.7044
731	-6.12875	-13.3069	-11.1977	-8.37119	-40.0741	-15.8821	20.7701	-15.1344	53.1407	-13.6924
732	-6.11685	-13.2615	-11.1456	-8.35894	-38.4912	-15.885	19.6522	-14.9393	48.7105	-13.6816
733	-6.10494	-13.2163	-11.0948	-8.34678	-37.0001	-15.888	18.5746	-14.7495	44.6173	-13.6719
734	-6.09303	-13.1714	-11.0452	-8.3347	-35.5951	-15.8909	17.5358	-14.565	40.8339	-13.6632
735	-6.08112	-13.1267	-10.9966	-8.32271	-34.2708	-15.8938	16.5341	-14.3855	37.3352	-13.6555
736	-6.0692	-13.0823	-10.9492	-8.31079	-33.0223	-15.8966	15.568	-14.2109	34.0987	-13.6487
737	-6.05728	-13.0381	-10.9028	-8.29895	-31.8449	-15.8995	14.6361	-14.041	31.1034	-13.6428
738	-6.04535	-12.9942	-10.8574	-8.28717	-30.7342	-15.9023	13.7371	-13.8758	28.3303	-13.6377
739	-6.03343	-12.9505	-10.813	-8.27546	-29.6862	-15.905	12.8696	-13.7149	25.7618	-13.6334
740	-6.02149	-12.9071	-10.7695	-8.26382	-28.697	-15.9078	12.0323	-13.5584	23.3819	-13.6299
741	-6.00956	-12.8639	-10.7268	-8.25223	-27.763	-15.9105	11.2242	-13.406	21.176	-13.6271
742	-5.99762	-12.8209	-10.6851	-8.24071	-26.881	-15.9131	10.4439	-13.2576	19.1305	-13.6249
743	-5.98567	-12.7782	-10.6441	-8.22924	-26.0477	-15.9157	9.69045	-13.1131	17.2331	-13.6234
744	-5.97373	-12.7358	-10.604	-8.21782	-25.2602	-15.9183	8.9628	-12.9724	15.4724	-13.6224
745	-5.96178	-12.6935	-10.5646	-8.20645	-24.5158	-15.9209	8.25993	-12.8354	13.838	-13.6221
746	-5.94983	-12.6515	-10.5259	-8.19513	-23.812	-15.9234	7.58088	-12.7019	12.3202	-13.6223
747	-5.93787	-12.6098	-10.488	-8.18386	-23.1462	-15.9259	6.92473	-12.5719	10.9103	-13.623
748	-5.92592	-12.5683	-10.4507	-8.17262	-22.5164	-15.9284	6.29062	-12.4451	9.60006	-13.6242
749	-5.91396	-12.527	-10.4141	-8.16143	-21.9202	-15.9308	5.67769	-12.3216	8.38208	-13.6259
750	-5.90199	-12.486	-10.3781	-8.15028	-21.3558	-15.9332	5.08514	-12.2012	7.24947	-13.628
751	-5.89003	-12.4452	-10.3427	-8.13916	-20.8213	-15.9355	4.51221	-12.0839	6.19588	-13.6305
752	-5.87806	-12.4046	-10.3079	-8.12808	-20.3149	-15.9379	3.95815	-11.9695	5.21549	-13.6335
753	-5.86609	-12.3643	-10.2736	-8.11703	-19.8351	-15.9401	3.42225	-11.8579	4.30291	-13.6368
754	-5.85412	-12.3242	-10.2399	-8.10601	-19.3802	-15.9424	2.90385	-11.7491	3.45317	-13.6406
755	-5.84215	-12.2843	-10.2068	-8.09503	-18.9489	-15.9446	2.40228	-11.6429	2.66171	-13.6446
756	-5.83017	-12.2447	-10.1741	-8.08407	-18.5398	-15.9467	1.91693	-11.5394	1.92429	-13.6491
757	-5.81819	-12.2053	-10.142	-8.07313	-18.1516	-15.9489	1.44719	-11.4384	1.23701	-13.6538
758	-5.80622	-12.1661	-10.1103	-8.06222	-17.7831	-15.951	0.992497	-11.3398	0.596275	-13.6588
759	-5.79423	-12.1272	-10.0791	-8.05134	-17.4332	-15.953	0.5523	-11.2435	-0.00124538	-13.6642
760	-5.78225	-12.0884	-10.0483	-8.04047	-17.101	-15.955	0.126069	-11.1496	-0.558629	-13.6698
761	-5.77027	-12.05	-10.018	-8.02963	-16.7852	-15.957	-0.286702	-11.0579	-1.07872	-13.6757
762	-5.75829	-12.0117	-9.98805	-8.01881	-16.4852	-15.9589	-0.686499	-10.9683	-1.56415	-13.6819
763	-5.7463	-11.9736	-9.95853	-8.008	-16.1999	-15.9608	-1.07379	-10.8809	-2.01735	-13.6883
764	-5.73431	-11.9358	-9.92941	285.019	-15.9286	-15.9627	-1.44902	-10.7954	-2.44057	-13.695
765	-5.72233	-11.8982	-9.90066	272.12	-15.6705	-15.9645	-1.81262	-10.712	-2.83591	-13.7019
766	-5.71034	-11.8609	-9.87229	259.871	-15.4249	-15.9662	-2.165	-10.6304	-3.20529	-13.709
767	-5.69835	-11.8237	-9.84427	248.235	-15.191	-15.968	-2.50657	-10.5507	-3.5505	-13.7163
768	-5.68636	-11.7868	-9.8166	237.178	-14.9683	-15.9697	-2.8377	-10.4729	-3.87321	-13.7238
769	-5.67437	-11.75	-9.78927	226.668	-14.7561	-15.9713	-3.15876	-10.3967	-4.17495	-13.7316
770	-5.66238	-11.7135	-9.76226	216.674	-14.5539	-15.9729	-3.4701	-10.3223	-4.45715	-13.7395
771	-5.65038	-11.6773	-9.73557	207.166	-14.3612	-15.9745	-3.77206	-10.2495	-4.72114	-13.7476
772	-5.63839	-11.6412	-9.70918	198.12	-14.1773	-15.976	-4.06497	-10.1783	-4.96814	-13.7559
773	-5.6264	-11.6053	-9.6831	189.508	-14.0019	-15.9775	-4.34913	-10.1087	-5.19929	-13.7644
774	-5.61441	-11.5697	-9.65731	181.308	-13.8346	-15.9789	-4.62486	-10.0406	179.145	-13.773
775	-5.60242	-11.5342	204.55	173.497	-13.6748	-15.9803	-4.89244	-9.97391	162.111	-13.7818
776	-5.59043	-11.499	193.761	166.053	-13.5222	-15.9817	-5.15215	-9.90868	146.705	-13.7908
777	-5.57844	-11.464	183.57	158.958	-13.3764	-15.983	-5.40426	-9.84483	132.763	-13.7999
778	-5.56645	-11.4292	173.938	152.192	-13.237	-15.9842	-5.64902	-9.78232	120.135	-13.8091
779	-5.55445	-11.3946	164.829	145.738	-13.1038	-15.9854	-5.88669	-9.72112	108.692	-13.8185
780	-5.54246	-11.3602	156.21	139.58	-12.9764	-15.9866	-6.11751	-9.66118	98.3136	-13.828
781	-5.53048	-11.326	148.049	133.701	-12.8545	-15.9878	-6.3417	-9.60248	88.8961	-13.8377
782	-5.51849	-11.292	140.318	128.087	-12.7378	-15.9888	-6.55948	-9.54497	80.3448	-13.8474
783	-5.5065	-11.2582	132.99	122.724	-12.6261	-15.9899	-6.77108	-9.48863	72.5751	-13.8573
784	-5.49451	-11.2246	126.04	117.6	-12.5191	-15.9909	-6.97669	-9.43342	65.5114	-13.8674
785	-5.48253	-11.1912	119.444	112.702	-12.4166	-15.9918	-7.17652	-9.3793	59.0857	-13.8775
786	-5.47054	-11.158	113.181	108.018	-12.3183	-15.9927	-7.37076	-9.32626	53.2369	-13.8878
787	-5.45856	-11.125	107.231	103.538	-12.2241	-15.9936	-7.55958	-9.27425	47.9102	-13.8981
788	-5.44658	-11.0922	101.575	99.2511	-12.1337	-15.9944	-7.74317	-9.22325	43.0563	-13.9086
789	-5.4346	-11.0596	96.195	95.1478	-12.0469	-15.9952	-7.9217	-9.17323	38.6309	-13.9192
790	-5.42262	-11.0271	91.0755	91.219	-11.9636	-15.9959	-8.09534	-9.12416	34.594	-13.9298
791	-5.41064	-10.9949	86.201	87.456	-11.8836	-15.9966	-8.26424	-9.07602	30.9095	-13.9406
792	-5.39867	-10.9629	81.5574	83.8507	-11.8068	-15.9972	-8.42855	-9.02879	27.5451	-13.9515
793	-5.3867	-10.931	77.1313	80.3954	-11.7329	-15.9978	-8.58843	-8.98242	24.4713	-13.9624
794	-5.37473	-10.8994	72.9106	77.0827	-11.6619	-15.9983	-8.74401	-8.93692	21.6617	-13.9735
795	-5.36276	-10.8679	68.8835	73.9059	-11.5936	-15.9988	-8.89544	-8.89224	19.0924	-13.9846
796	-5.35079	-10.8366	65.0395	70.8584	-11.5279	-15.9993	-9.04285	-8.84837	16.7417	-13.9958
797	-5.33883	-10.8055	61.3683	67.9342	-11.4646	-15.9997	-9.18636	-8.80528	14.5901	-14.0071
798	-5.32686	-10.7746	57.8605	65.1273	-11.4036	-16	-9.3261	-8.76295	12.6199	236.446
799	-5.3149	-10.7438	54.5074	62.4323	-11.3449	-16.0003	-9.46219	-8.72137	10.815	222.501
800	-5.30295	-10.7133	51.3006	59.844	-11.2884	-16.0006	-9.59474	-8.68051	9.16086	209.422
801	-5.29099	-10.6829	48.2324	57.3575	-11.2338	-16.0008	-9.72387	-8.64036	7.64425	197.148
802	-5.27904	-10.6527	45.2955	54.9681	-11.1812	-16.001	-9.84968	-8.60088	6.2532	185.624
803	-5.26709	-10.6227	42.4831	52.6714	-11.1304	-16.0011	-9.97227	-8.56208	4.97685	174.798
804	-5.25515	-10.5928	39.7889	50.4632	-11.0814	-16.0011	-10.0917	-8.52392	3.8053	164.623
805	-5.2432	-10.5632	37.2068	48.3395	-11.0341	-16.0011	-10.2082	-8.48639	2.72956	155.055
806	-5.23126	-10.5337	34.7312	46.2967	-10.9884	-16.0011	-10.3217	-8.44947	1.74147	146.054
807	-5.21933	-10.5043	32.3567	44.331	-10.9442	-16.001	-10.4324	-8.41316	0.83358	137.581
808	-5.2074	-10.4752	30.0784	42.4392	-10.9015	-16.0009	-10.5404	-8.37742	-0.000879188	129.602
809	-5.19547	-10.4462	27.8916	40.618	-10.8601	-16.0007	-10.6457	-8.34225	-0.768077	122.084
810	-5.18354	-10.4174	25.7919	38.8644	-10.8201	-16.0005	-10.7484	-8.30763	-1.47364	114.997
811	-5.17162	-10.3888	23.7751	37.1754	-10.7814	-16.0002	-10.8486	-8.27355	-2.12269	108.314
812	-5.1597	-10.3603	21.8372	35.5484	-10.744	-15.9999	-10.9464	-8.23999	-2.71992	102.009
813	-5.14779	-10.332	19.9746	33.9806	-10.7076	-15.9995	-11.0418	-8.20694	-3.26958	96.0563
814	-5.13588	-10.3038	18.1837	32.4696	-10.6724	-15.9991	-11.135	-8.17439	-3.77559	90.435
815	-5.12397	-10.2758	16.4614	31.0131	-10.6383	-15.9986	-11.2259	-8.14232	-4.2415	85.124
816	-5.11207	-10.248	14.8043	29.6088	-10.6052	-15.9981	-11.3147	-8.11071	-89.1654	80.104
817	-5.10017	-10.2204	13.2097	28.2544	-10.5731	-15.9976	-11.4014	-8.07957	-82.3193	75.3571
818	-5.08828	-10.1928	11.6747	26.9481	-10.5419	-15.9969	-11.4861	-8.04887	-76.0894	70.8664
819	-5.07639	-10.1655	10.1966	25.6879	-10.5116	-15.9963	-11.5688	-8.01861	-70.4181	66.6163
820	-5.0645	-10.1383	8.77306	24.4718	-10.4822	-15.9956	-11.6496	-7.98877	-65.2534	62.5925
821	-5.05262	-10.1113	7.40161	23.2982	-10.4536	-15.9948	-11.7286	-7.95934	-60.548	58.7813
822	-5.04075	-10.0844	6.08004	22.1653	-10.4258	-15.994	-11.8058	-7.93031	-56.2595	55.1701
823	-5.02888	-10.0577	4.80622	21.0715	-10.3988	-15.9931	-11.8812	-7.90168	-52.3493	51.7472
824	-5.01701	-10.0311	3.57814	20.0154	-10.3725	-15.9922	-11.9549	-7.87343	-48.7824	48.5015
825	-5.00515	-10.0047	2.39388	18.9954	-10.3469	-15.9912	-12.027	-7.84555	-45.5274	45.4227
826	-4.9933	-9.97847	1.25164	18.0102	-10.322	-15.9902	-12.0976	-7.81803	-42.5556	42.5013
827	-4.98145	-9.95236	0.14969	17.0584	-10.2977	-15.9891	-12.1665	-7.79086	-39.8414	39.7283
828	-4.9696	-9.9264	-0.913612	16.1387	-10.274	-15.988	-12.234	-7.76404	-37.3611	37.0952
829	-4.95777	-9.90058	-1.93982	15.25	-10.2509	-15.9869	-12.3	-7.73756	-35.0938	34.5942
830	-4.94593	-9.87492	-2.93042	192.998	-10.2284	-15.9856	-12.3646	-7.7114	-33.0202	32.2179
831	-4.9341	-9.84939	-3.88681	183.015	-10.2065	-15.9844	-12.4278	-7.68556	-31.1228	29.9594
832	-4.92228	-9.82402	-4.81034	173.536	-10.185	-15.9831	-12.4897	-7.66003	-29.386	27.8122
833	-4.91047	-9.79878	-5.70229	164.526	-10.1641	-15.9817	-12.5503	-7.6348	-27.7954	25.7703
834	-4.89865	-9.77369	-6.56388	155.955	-10.1437	-15.9803	-12.6096	-7.60987	-26.338	23.8279
835	-4.88685	-9.74874	-7.39626	147.795	-10.1237	-15.9788	-12.6677	-7.58523	-25.0022	21.9797
836	-4.87505	-9.72393	-8.20054	140.019	-10.1042	-15.9773	-12.7246	-7.56087	-23.7771	20.2207
837	-4.86326	-9.69926	-8.97778	132.602	-10.0851	-15.9757	-12.7804	-7.53679	-22.6531	18.5461
838	-23.1891	-9.67473	-9.72899	125.522	-10.0665	-15.9741	-12.835	-7.51297	209.068	16.9515
839	-22.7617	-9.65034	-10.4551	118.757	-10.0482	-15.9725	-12.8885	-7.48941	188.18	15.4328
840	-22.3473	-9.62608	-11.1571	112.287	-10.0303	-15.9707	-12.941	-7.46611	169.393	13.9858
841	-21.9454	-9.60195	-11.8358	106.094	-10.0128	-15.969	-12.9924	-7.44305	152.482	12.607
842	-21.5557	-9.57797	-12.4921	100.161	-9.99571	-15.9672	-13.0428	-7.42024	137.246	11.2929
843	-21.1776	-9.55411	-13.1268	94.4709	-9.97892	-15.9653	-13.0922	-7.39766	123.509	10.0401
844	-20.8109	-9.53039	-13.7406	89.0093	-9.96246	-15.9634	-13.1407	-7.37531	111.114	8.84564
845	-20.4551	-9.50679	-14.3342	83.7622	-9.94633	-15.9614	-13.1883	-7.35319	99.9215	7.70646
846	-20.1098	-9.48333	-14.9085	78.7164	-9.93051	-15.9594	-13.235	-7.33129	89.8071	6.61985
847	-19.7747	-9.46	-15.464	208.699	-9.91499	-15.9573	-13.2808	-7.3096	80.6604	5.58318
848	-19.4495	-9.43679	-16.0014	193.762	-9.89975	-15.9552	-13.3257	-7.28812	72.3832	4.59399
849	-19.1338	-9.41372	-16.5213	179.608	-9.8848	-15.953	-13.3698	-7.26684	64.8877	3.64995
850	-18.8273	203.522	-17.0243	166.166	-9.87011	-15.9508	-13.4131	-7.24577	58.0956	2.74886
851	-18.5297	197.045	-17.511	153.37	-9.85569	-15.9485	-13.4556	-7.22489	51.9369	1.88863
852	-18.2407	190.801	-17.9819	141.159	-9.84151	-15.9462	-13.4973	-7.20419	46.3492	1.06729
853	-17.96	184.78	-18.4376	129.477	-9.82758	-15.9438	-13.5383	-7.18369	41.2763	0.282966
854	-17.6874	178.97	-18.8785	118.272	-9.81389	-15.9414	-13.5786	-7.16336	36.6683	-0.466101
855	-17.4225	173.363	-19.3052	107.495	-9.80042	-15.9389	-13.6182	-7.14321	32.4801	-1.18159
856	-17.1652	167.948	-19.718	97.1003	-9.78717	-15.9364	-13.6571	-7.12323	28.6713	-1.86508
857	-16.9151	162.716	-20.1175	87.0449	-9.77413	-15.9339	-13.6953	-7.10342	25.2059	-2.51809
858	-16.6721	157.66	-20.5041	77.2876	-9.76129	-15.9312	-13.7328	-7.08377	22.0512	-3.14203
859	-16.4359	152.769	-20.8782	67.7888	-9.74865	-15.9286	-13.7698	-7.06429	19.1779	-3.73826
860	-16.2063	148.037	-21.2402	58.51	-9.73621	-15.9258	-13.8061	-7.04496	16.5598	-4.30807
861	-15.9831	143.457	-21.5904	49.4133	-9.72395	-15.9231	-13.8418	-7.02578	14.173	-4.85266
862	-15.7661	139.021	-21.9293	40.4611	-9.71187	-15.9203	-13.8769	-7.00676	11.9961	-5.37321
863	-15.555	134.722	-22.2571	31.6151	-9.69996	-15.9174	-13.9114	-6.98787	10.0099	-5.8708
864	-15.3497	130.554	-22.5743	22.8362	-9.68822	-15.9145	-13.9454	-6.96914	8.19696	-6.34648
865	-15.15	126.511	-22.8811	14.083	-9.67664	-15.9115	-13.9788	-6.95054	6.54147	-6.80124
866	-14.9558	122.587	-23.1779	5.31169	-75.7451	-15.9085	-14.0117	-6.93207	5.02923	-7.23604
867	-14.7668	118.776	-23.465	-3.5258	-72.7629	-15.9054	-14.0441	-6.91374	3.64737	-7.65175
868	-14.5828	115.074	110.632	-12.4828	-69.9261	-15.9023	-14.076	-6.89554	2.38424	-8.04924
869	-14.4038	111.474	103.667	-21.6199	-67.2271	-15.8991	-14.1074	-6.87747	1.22929	-8.42932
870	-14.2295	107.973	96.9785	-31.0076	-64.6588	-15.8959	-14.1383	-6.85952	0.172954	-8.79277
871	-14.0599	104.565	90.5464	-40.7294	-62.2146	-15.8926	-14.1688	-6.84169	-0.793441	-9.14031
872	-13.8947	101.246	84.3531	-50.8872	-59.888	-15.8893	-14.1988	-6.82399	-1.67776	-9.47264
873	-13.7339	98.0112	78.3816	-61.6073	-57.6731	-15.8859	-69.4288	-6.80639	-2.48714	-9.79044
874	-13.5773	94.8574	72.6162	-73.0513	-55.5641	-15.8825	-67.566	-6.78891	-3.22808	-10.0943
875	-13.4247	91.7801	67.042	-85.4314	-53.5556	-15.8791	-65.7721	-6.77154	-3.90647	-10.385
876	-13.2761	88.7757	61.6449	-99.0351	-51.6425	-15.8755	-64.0444	-6.75428	-4.52766	-10.6629
877	-13.1312	85.8405	56.4118	-114.266	-49.8199	-15.872	-62.3803	-6.73712	-5.09655	-10.9286
878	-12.9901	82.971	51.33	-131.718	-48.0833	-15.8684	-60.7774	-6.72007	-5.61756	-11.1827
879	-12.8526	80.1636	46.3877	-152.309	-46.4283	-15.8647	-59.2331	-6.70312	-6.09474	-11.4256
880	-12.7185	77.4153	41.5735	-443.162	-44.8509	-15.861	-57.7453	-6.68627	-6.53177	-11.6579
881	-12.5879	74.7227	36.8765	-470.999	-43.347	-15.8572	-56.3117	-6.66951	-6.93203	-11.88
882	-12.4605	72.0828	32.2861	435.849	-41.9131	-15.8534	-54.9301	-6.65285	-7.29856	-12.0924
883	-12.3362	69.4925	27.7923	432.058	-40.5456	-15.8496	-53.5986	-6.63628	-7.63416	-12.2953
884	-12.215	66.9489	23.3851	428.298	-39.2412	-15.8457	-52.3152	-6.6198	-7.9414	-12.4894
885	-12.0968	64.4491	19.0549	424.569	-37.9968	-15.8417	-51.0781	-6.60341	-8.2226	-12.6748
886	-11.9815	61.9903	14.7921	420.871	-36.8094	-15.8377	-49.8853	-6.58711	-8.47988	-12.8521
887	-11.869	59.5696	10.5873	393.424	-35.6763	-15.8337	-48.7354	-6.57089	-8.71521	-13.0214
888	-11.7592	57.1842	6.43091	367.908	-34.5946	-15.8296	-47.6264	-6.55476	-8.93036	-13.1833
889	-11.6521	54.8315	2.3135	344.174	-33.5619	-15.8254	-46.557	-6.5387	-9.12696	-13.3379
890	-11.5475	52.5086	-1.77473	322.084	-32.5758	-15.8212	-45.5256	-6.52273	-9.30651	-13.4857
891	-11.4454	50.2128	-5.8438	301.512	-31.6341	-15.817	-44.5307	-6.50683	-9.47037	-13.6268
892	-11.3457	47.9413	-9.90409	282.341	-30.7345	-15.8127	-43.5709	-6.49101	-9.6198	-13.7615
893	-11.2483	45.6913	-13.9665	264.465	-29.8751	-15.8084	-42.6449	-6.47526	-9.75594	-13.8902
894	-11.1532	43.4599	-18.0427	247.786	-29.0538	-15.804	-41.7514	-6.45958	-9.87985	-14.013
895	-22.841	41.2442	-22.145	232.215	-28.2689	-15.7996	-40.8892	-6.44398	-9.9925	-14.1303
896	-22.3008	39.0411	-26.2868	217.667	-27.5186	-15.7951	-40.0571	-6.42845	-10.0948	-14.2422
897	-21.7829	36.8475	-30.4829	204.068	-26.8012	-15.7905	-39.2539	-6.41298	-10.1875	-14.349
898	-21.2862	34.6601	-34.7497	191.348	-26.1152	-15.786	-38.4786	-6.39759	-10.2714	-14.4509
899	-20.8099	32.4754	-39.1055	179.441	-25.4591	-15.7814	-37.7302	-6.38225	-10.3471	-14.5481
900	-20.3529	30.2898	-43.571	168.289	-24.8315	-15.7767	-37.0075	-6.36699	-10.4154	-14.6407
901	-19.9144	28.0992	-48.1703	157.838	-24.231	-15.772	-36.3097	-6.35178	-10.4767	-14.7291
902	-19.4936	25.8995	-52.931	148.036	-23.6564	-15.7672	-35.6358	-6.33664	-10.5317	-14.8133
903	-19.0897	23.686	-57.886	138.839	-23.1063	-15.7624	-34.985	-6.32155	-10.5808	-14.8935
904	-18.702	21.4538	-63.0744	130.204	-22.5798	-15.7575	-34.3563	-6.30653	-10.6245	-14.9699
905	-18.3296	19.1972	-68.5436	122.09	-22.0757	-15.7526	-33.749	-6.29156	-10.6631	-15.0426
906	-17.972	16.9101	-74.352	114.463	-21.5929	-15.7477	-33.1623	-6.27665	-10.6971	-15.1118
907	-17.6286	14.5856	-80.5729	107.289	-21.1305	-15.7427	-32.5954	-6.2618	-10.7268	-15.1777
908	-17.2985	12.2158	-87.2997	100.536	-20.6875	-15.7377	-32.0476	-6.247	-10.7526	-15.2404
909	-16.9814	9.79175	-94.6545	94.1777	-20.263	-15.7326	-31.5183	-6.23225	-10.7747	-15.3
910	-16.6766	7.30305	-102.801	88.1863	-19.8562	-15.7274	-31.0066	-6.21756	-10.7935	-15.3567
911	-16.3836	4.73763	-111.965	82.5379	-19.4663	-15.7223	-30.5121	-6.20292	-10.8092	-15.4105
912	-16.1019	2.08122	-122.47	77.21	-19.0925	-15.717	-30.034	-6.18833	-10.8219	-15.4616
913	-15.831	-0.683202	-134.802	72.1819	-18.7341	-15.7118	-29.5718	-6.17379	-10.832	-15.5101
914	-15.5704	-3.57622	-149.729	67.4343	-18.3904	-15.7065	-29.1249	-6.15929	-10.8397	-15.5561
915	-15.3197	-6.6231	-168.568	62.9493	-18.0607	-15.7011	-28.6927	-6.14485	-10.8451	-15.5997
916	-15.0785	-9.85531	276.414	58.7104	-17.7444	-15.6957	-28.2748	-6.13045	-10.8484	-15.641
917	-14.8463	-13.3128	273.989	54.7022	-17.4409	-15.6903	-27.8706	-6.11609	-10.8497	-15.6802
918	-14.6228	-17.0472	271.584	-66.8716	-17.1496	-15.6848	-27.4797	-6.10178	-10.8493	-15.7172
919	-14.4076	-21.1271	269.199	-63.6304	-16.87	-15.6792	-27.1015	-6.08752	-10.8472	-15.7523
920	-14.2003	-25.6461	266.833	-60.6008	-16.6015	-15.6736	-26.7356	-6.0733	-10.8436	-15.7854
921	-14.0007	-30.736	256.725	-57.7681	-16.3437	-15.668	-26.3816	-6.05912	-10.8386	-15.8167
922	-13.8084	-36.5908	247.054	-55.1189	-16.0962	-15.6623	-26.0391	-6.04498	-10.8323	-15.8462
923	-13.6231	-43.5111	237.796	-52.6407	-15.8584	-15.6566	-25.7076	-6.03088	-10.8247	-15.874
924	-13.4445	-51.9959	228.932	-50.3218	-15.6299	-15.6509	-25.3868	-6.01683	-10.8161	-15.9002
925	-13.2723	-62.9544	220.441	-48.1513	-15.4103	-15.6451	-25.0763	-6.00281	-10.8065	-15.9249
926	-13.1063	133.116	212.306	-46.1192	-15.1993	-15.6392	-24.7757	-5.98883	-10.7959	-15.9481
927	-12.9462	131.852	204.509	-44.216	-14.9964	-15.6333	-24.4848	-5.97489	-10.7845	-15.9699
928	-12.7918	130.599	197.033	-42.4329	-14.8014	-15.6274	-24.2031	-5.96099	-10.7722	-15.9903
929	-12.6427	129.356	189.863	-40.762	-14.6138	-15.6214	-23.9304	-5.94712	-10.7593	-16.0094
930	-12.4989	128.124	182.983	-39.1955	-14.4334	-15.6154	-23.6663	-5.93329	-10.7456	-16.0273
931	-12.3601	125.181	176.381	-37.7265	-14.2599	-15.6093	-23.4105	-5.9195	-10.7314	-16.044
932	-12.2261	122.316	170.041	-36.3485	-14.0929	-15.6032	-23.1629	-5.90574	-10.7165	-16.0596
933	-12.0967	119.526	163.953	-35.0553	-13.9322	-15.5971	-22.923	-5.89201	-10.7012	-16.0741
934	-11.9717	116.809	158.104	-33.8412	-13.7775	-15.5909	-22.6906	-5.87832	-10.6854	-16.0876
935	-11.8509	114.162	152.482	-32.7012	-13.6286	-15.5846	-22.4655	-5.86466	-10.6691	-16.1001
936	-11.7342	111.583	147.076	-31.6301	-13.4852	-15.5783	-22.2474	-5.85104	-10.6525	-16.1116
937	-11.6214	109.071	141.878	-30.6236	-13.3471	-15.572	-22.0361	-5.83744	-10.6355	-16.1223
938	-11.5124	106.622	136.876	-29.6773	-13.214	-15.5657	-21.8314	-5.82388	-10.6181	-16.1321
939	-11.4069	104.236	132.063	-28.7872	-13.0859	-15.5593	-21.633	-5.81035	-10.6005	-16.1411
940	-11.3049	101.909	127.428	-27.9499	-12.9624	-15.5528	-21.4407	-5.79685	-10.5826	-16.1493
941	-11.2062	99.6407	122.964	-27.1617	-12.8433	-15.5463	-21.2543	-5.78338	-10.5644	-16.1568
942	-11.1108	97.4287	118.664	-26.4195	-12.7286	-15.5398	-21.0737	-5.76994	-10.5461	-16.1635
943	-11.0183	95.2714	114.519	-25.7204	-12.6179	-15.5332	-20.8987	-5.75652	-10.5275	-16.1696
944	-10.9288	93.1671	110.523	-25.0616	-12.5112	-15.5266	-20.7289	-5.74314	-10.5088	-16.1751
945	-10.8422	91.1141	106.669	-24.4406	-12.4083	-15.5199	-20.5644	-5.72979	-10.4899	-16.18
946	-10.7582	89.1109	102.951	-23.8548	-12.309	-15.5132	-20.4049	-5.71646	-10.4709	-16.1842
947	-10.6769	87.1561	99.362	-23.3021	-12.2132	-15.5065	-20.2502	-5.70316	-10.4517	-16.188
948	-10.5981	85.248	95.8974	-22.7805	-12.1207	-15.4997	-20.1002	-5.68989	-10.4325	-16.1912
949	-10.5217	83.3855	92.5514	-22.2878	-12.0314	-15.4929	-19.9547	-5.67664	-10.4131	-16.194
950	-10.4476	81.567	89.3188	-21.8224	-46.0236	-15.4861	-19.8137	-5.66342	-10.3937	-16.1962
951	-10.3757	79.7912	86.1949	-21.3826	-44.3163	-15.4792	-19.6768	-5.65022	-10.3743	-16.1981
952	-10.306	78.057	83.1748	-20.9667	-42.6963	-15.4722	-19.5441	-5.63706	-10.3547	-16.1995
953	-10.2384	76.3631	80.2543	-20.5733	-41.1588	-15.4652	-19.4154	-5.62391	-10.3352	-16.2005
954	-10.1727	74.7084	77.4292	-20.201	-39.6993	-15.4582	-19.2905	-5.61079	-10.3156	-16.2011
955	-10.109	73.0916	74.6954	-19.8486	-38.3135	-15.4512	-19.1694	-5.5977	-10.2959	-16.2015
956	-10.0471	71.5117	72.0491	-19.5147	-36.9975	-15.4441	-19.0518	-5.58463	-10.2763	-16.2014
957	-9.98691	69.9676	69.4868	-19.1983	-35.7474	-15.4369	-18.9378	-5.57158	-10.2567	-16.2011
958	-9.92846	68.4583	67.0051	-18.8984	-34.5598	-15.4298	-18.8271	-5.55856	-10.237	-16.2005
959	-9.87166	66.9828	64.6006	-18.6139	-33.4312	-15.4226	-18.7197	-5.54556	-10.2174	-16.1996
960	-9.81643	65.5402	62.2702	-18.344	-32.3586	-15.4153	-18.6155	-5.53258	-10.1978	-16.1984
961	-9.76272	64.1295	60.011	-18.0878	-31.3389	-15.408	-18.5143	-5.51963	-10.1782	-16.197
962	-9.71047	62.7498	57.8202	-17.8444	-30.3693	-15.4007	-18.4161	-5.5067	-10.1587	-16.1954
963	-9.65962	61.4003	55.695	-17.6131	-29.4472	-15.3933	-18.3209	-5.49379	-10.1392	-16.1936
964	-9.61013	60.0801	53.633	-17.3933	-28.57	-15.3859	-18.2284	-5.4809	-10.1197	-16.1916
965	-9.56195	58.7884	51.6316	-17.1842	-27.7355	-15.3785	-18.1386	-5.46803	-10.1003	-16.1894
966	-9.51502	57.5244	49.6886	-16.9852	-26.9413	-15.371	-18.0514	-5.45519	-10.0809	-16.187
967	-9.4693	56.2874	47.8017	-16.7958	-26.1853	-15.3635	-17.9668	-5.44236	-10.0615	-16.1845
968	-9.42475	55.0767	45.9687	-16.6154	-25.4657	-15.3559	-17.8846	-5.42956	-10.0422	-16.1818
969	-9.38132	53.8914	44.1877	-16.4435	-24.7804	-15.3483	-17.8049	-5.41678	-10.023	-16.1791
970	-9.33898	52.731	42.4568	-16.2796	-24.1278	-15.3407	-17.7274	-5.40402	-93.6181	-16.1762
971	-9.29767	51.5948	40.7741	-16.1233	-23.506	-15.333	-17.6522	-5.39127	-88.4154	-16.1732
972	-9.25737	50.4821	39.1377	-15.9741	-22.9137	-15.3253	-17.5791	-5.37855	-83.5521	-16.1701
973	-9.21805	49.3924	37.5461	-15.8317	-22.3491	-15.3175	-17.5082	-5.36585	-79.005	-16.1669
974	-9.17965	48.3249	35.9977	-15.6957	-21.811	-15.3098	-17.4393	-5.35317	-74.7527	-16.1636
975	-9.14216	47.2792	34.4908	-15.5657	-21.298	-15.302	-17.3724	-5.3405	-70.7753	-16.1603
976	-9.10553	46.2546	33.024	-15.4415	-20.8088	-15.2941	-17.3074	-5.32786	-67.054	-16.157
977	-9.06974	45.2506	31.596	-15.3226	-20.3422	-15.2862	-17.2443	-5.31523	-63.5715	-16.1535
978	-9.03476	44.2667	30.2052	-15.2088	-19.897	-15.2783	-17.183	-5.30263	-60.3118	-16.1501
979	-9.00055	43.3024	28.8506	-15.0999	-19.4723	-15.2703	-17.1234	-5.29004	-57.2598	-16.1466
980	-8.9671	42.3572	27.5307	-14.9955	-19.067	-15.2623	-17.0655	-5.27747	-54.4016	-16.1431
981	-8.93437	41.4305	26.2445	-14.8955	-18.68	-15.2543	-17.0093	-5.26492	-51.7241	-16.1396
982	-8.90233	40.522	24.9908	-14.7997	-18.3106	-15.2462	-16.9547	-5.25239	-49.2153	-16.136
983	-8.87098	39.6311	23.7685	-14.7077	-17.9578	-15.2381	-16.9016	-5.23987	-46.8639	-16.1325
984	-8.84027	38.7575	22.5765	-14.6194	-17.6208	-15.23	-16.8501	-5.22738	-44.6595	-16.1289
985	-8.81018	37.9006	21.4139	-14.5346	-17.2989	-15.2218	-16.8	-5.2149	-42.5923	-16.1254
986	-8.78071	37.0602	20.2797	-14.4532	-16.9913	-15.2136	-16.7513	-5.20243	-40.6533	-16.1219
987	-8.75181	36.2357	19.173	-14.375	-16.6973	-15.2054	-16.704	-5.18999	-38.8339	-16.1184
988	-8.72349	35.4269	18.0928	-14.2997	-16.4162	-15.1971	-16.6581	-5.17756	-37.1264	-16.1149
989	-8.6957	34.6333	17.0384	-14.2273	-16.1475	-15.1888	-16.6134	-5.16515	-35.5235	-16.1115
990	-8.66844	33.8545	16.0089	-14.1576	-15.8905	-15.1804	-16.57	-5.15276	-34.0183	-16.1081
991	-8.64168	33.0902	15.0035	-14.0906	-15.6447	-15.1721	-16.5278	-5.14039	-32.6044	-16.1048
992	-8.61542	32.3401	14.0215	-14.0259	-15.4095	-15.1637	-16.4868	-5.12803	-31.276	-16.1014
993	-8.58963	31.6038	13.0622	-13.9637	-15.1844	-15.1552	-16.447	-5.11569	-30.0274	-16.0982
994	-8.56429	30.8811	12.1248	-13.9036	-14.969	-15.1467	-16.4082	-5.10336	-28.8537	-16.095
995	-8.53939	30.1715	11.2087	-13.8457	-14.7628	-15.1382	-16.3706	-5.09105	-27.75	-16.0918
996	-8.51492	29.4748	10.3132	-13.7898	-14.5653	-15.1297	-16.334	-5.07876	-26.7118	-16.0887
997	-8.49086	28.7906	9.43769	-13.7359	-14.3761	-15.1211	-16.2984	-5.06648	-25.735	-16.0857
998	-8.46719	28.1188	8.5816	-13.6837	-14.1949	-15.1125	-16.2639	-5.05422	-24.8157	-16.0827
999	-8.44391	27.459	7.74434	-13.6334	-14.0213	-15.1038	-16.2303	-5.04198	-23.9501	-16.0798
1000	-8.421	26.8109	6.92534	-13.5847	-13.8549	-15.0952	-16.1976	-5.02975	-23.1351	-16.0769
1001	-8.39844	26.1743	6.12408	-13.5376	-13.6954	-15.0865	-16.1658	-5.01754	-22.3673	-16.0742
1002	-8.37623	25.549	5.34004	-13.4921	-13.5425	-15.0777	-16.135	-5.00534	-21.6439	-16.0715
1003	-8.35436	24.9346	4.5727	-13.448	-13.3958	-15.069	-16.105	-4.99316	-20.9621	-16.0689
1004	-8.3328	24.3309	3.8216	-13.4054	-13.2551	-15.0602	-16.0758	-4.981	-20.3193	-16.0664
1005	-8.31156	23.7377	3.08626	-13.3641	-13.1201	-15.0513	-16.0474	-4.96885	-19.7131	-16.0639
1006	-8.29062	23.1548	2.36625	-13.324	-12.9906	-15.0425	-16.0199	-4.95672	-19.1413	-16.0616
1007	-8.26996	22.5819	1.66111	-13.2852	-12.8663	-15.0336	-15.993	-4.9446	-18.6017	-16.0593
1008	-8.24959	22.0188	0.970439	-13.2476	-12.7469	-15.0246	-15.967	-4.9325	-18.0924	-16.0571
1009	-8.22949	21.4654	0.293827	-13.2111	-12.6322	-15.0157	-15.9416	-4.92041	-17.6115	-16.0551
1010	-8.20965	20.9213	-0.369118	-13.1757	-12.5221	-15.0067	-15.917	-4.90834	-17.1574	-16.0531
1011	-8.19007	20.3865	-1.01877	-13.1413	-12.4163	-14.9977	-15.893	-4.89629	-16.7283	-16.0512
1012	-8.17073	19.8606	-1.6555	-13.1079	-12.3147	-14.9886	-15.8697	-4.88425	-16.3229	-16.0493
1013	-8.15163	19.3436	-2.27967	-13.0755	-12.2169	-14.9795	-15.8471	-4.87222	-15.9397	-16.0476
1014	-8.13275	18.8352	-2.8916	-13.044	-12.123	-14.9704	-15.8251	-4.86021	-15.5773	-16.046
1015	-8.1141	18.3353	-3.49164	-13.0134	-12.0326	-14.9613	-15.8037	-4.84821	-15.2346	-16.0445
1016	-8.09566	17.8436	-4.08011	-12.9836	-11.9457	-14.9521	-15.7828	-4.83623	-14.9104	-16.0431
1017	-8.07743	17.3601	-4.65732	-12.9547	-11.862	-14.9429	-15.7626	-4.82427	-14.6035	-16.0417
1018	-8.0594	16.8845	-5.22356	-12.9265	-11.7816	-14.9337	-15.7429	-4.81232	-14.313	-16.0405
1019	-8.04156	16.4167	-5.77914	-12.8991	-11.7041	-14.9244	-15.7237	-4.80038	-14.0379	-16.0394
1020	-8.0239	15.9565	-6.32433	-12.8725	-11.6295	-14.9151	-15.7051	-4.78846	-13.7774	-16.0384
1021	-8.00643	15.5038	-6.8594	-12.8465	-11.5576	-14.9058	-15.687	-4.77656	-13.5305	-16.0374
1022	-7.98913	15.0584	-7.38464	-12.8212	-11.4884	-14.8965	-15.6694	-4.76467	-13.2964	-16.0366
1023	-7.972	14.6202	-7.90029	-12.7966	-11.4217	-14.8871	-15.6523	-4.75279	-13.0746	-16.0359
1024	-7.95504	14.189	-8.40661	-12.7726	-11.3574	-14.8777	-15.6356	-4.74093	-12.8641	-16.0353
1025	-7.93823	13.7647	-8.90383	-12.7492	-11.2954	-14.8683	-15.6194	-4.72908	-12.6645	-16.0348
1026	-7.92158	13.3471	-9.3922	-12.7264	-11.2356	-14.8588	-15.6037	-4.71725	-12.475	-16.0343
1027	-7.90507	12.9362	-9.87195	-12.7042	-11.178	-14.8493	-15.5884	-4.70544	-12.2952	-16.034
1028	-7.8887	12.5318	-10.3433	-12.6825	-11.1223	-14.8398	-15.5735	-4.69363	-12.1244	-16.0338
1029	-7.87248	12.1338	-10.8065	-12.6613	-11.0686	-18.9538	-15.559	-4.68185	-11.9622	-16.0337
1030	-7.85639	11.742	-11.2617	-12.6407	-11.0168	-18.7885	-15.5449	-4.67007	-11.808	-16.0337
1031	-7.84042	11.3564	-11.7091	-12.6206	-10.9667	-18.6276	-15.5312	-4.65832	-11.6615	-16.0338
1032	-7.82458	10.9767	-12.149	-12.6009	-10.9183	-18.4711	-15.5179	-4.64657	-11.5222	-16.034
1033	-7.80886	10.603	-12.5815	-12.5817	-10.8716	-18.3187	-15.5049	-4.63484	-11.3896	-16.0343
1034	-7.79326	10.235	-13.0068	-12.563	-10.8264	-18.1705	-15.4923	-4.62313	-11.2635	-16.0347
1035	-7.77777	9.87278	-13.4251	-12.5447	-10.7827	-18.0262	-15.4801	-4.61143	-11.1435	-16.0352
1036	-7.76239	9.5161	-13.8366	-12.5269	-10.7405	-17.8857	-15.4682	-4.59974	-11.0292	-16.0358
1037	-7.74712	9.16489	-14.2415	-12.5094	-10.6996	-17.7489	-15.4566	-4.58807	-10.9204	-16.0365
1038	-7.73195	8.81905	-14.6399	-12.4924	-10.66	-17.6158	-15.4453	-4.57642	-10.8167	-16.0373
1039	-7.71687	8.47849	-15.032	-12.4757	-10.6217	-17.4861	-15.4343	-4.56477	-10.7178	-16.0382
1040	-7.7019	8.1431	-15.418	-12.4594	-10.5847	-17.3598	-15.4237	-4.55315	-10.6236	-16.0392
1041	-7.68701	7.8128	-15.798	-12.4435	-10.5487	-17.2368	-15.4133	-4.54153	-10.5336	-16.0403
1042	-7.67221	7.4875	-16.1722	-12.4279	-10.5139	-17.117	-15.4032	-4.52994	-10.4479	-16.0415
1043	-7.6575	7.16709	-16.5407	-12.4127	-10.4802	-17.0003	-15.3934	-4.51835	-10.366	-16.0427
1044	-7.64288	6.8515	-16.9037	-12.3979	-10.4475	-16.8866	-15.3838	-4.50678	-10.2878	-16.0441
1045	-7.62833	6.54064	-17.2613	-12.3833	-10.4158	-16.7759	-15.3746	-4.49523	-10.2131	-16.0456
1046	-7.61386	6.23443	-17.6137	-12.3691	-10.385	-16.6679	-15.3655	-4.48369	-10.1417	-16.0472
1047	-7.59947	5.93277	-17.9611	-12.3552	-10.3551	-16.5627	-15.3567	-4.47216	-10.0734	-16.0488
1048	-7.58515	5.63561	-18.3034	-12.3416	-10.3261	-16.4602	-15.3482	-4.46065	-10.0081	-16.0506
1049	-7.5709	5.34284	-18.641	-12.3283	-10.2979	-16.3603	-15.3399	-4.44916	-9.94567	-16.0524
1050	-7.55672	5.05441	-18.9739	-12.3153	-10.2706	-16.2629	-15.3318	-4.43768	-9.88588	-16.0544
1051	-7.54261	4.77023	-19.3022	-12.3025	-10.244	-16.1679	-15.3239	-4.42621	-9.82863	-16.0564
1052	-7.52856	4.49023	-19.6261	-12.2901	-10.2181	-16.0754	-15.3163	278.772	-9.77378	-16.0585
1053	-7.51457	4.21433	-19.9457	-12.2779	-10.1929	-15.9851	-15.3088	270.424	-9.72121	-16.0607
1054	-7.50064	3.94248	-20.2611	-12.2659	-10.1685	-15.8971	-15.3016	262.38	-9.67081	-16.063
1055	-7.48677	3.67459	-20.5724	-12.2543	-10.1446	-15.8112	-15.2945	254.627	-9.62246	-16.0654
1056	-7.47296	3.41061	-20.8798	-12.2428	-10.1215	-15.7274	-15.2876	247.152	-9.57606	-16.0679
1057	-7.45919	3.15046	-21.1834	-12.2316	-10.0989	-15.6458	-15.281	239.943	-9.53151	-16.0704
1058	294.165	2.89409	-21.4833	-12.2207	-10.0769	-15.5661	-15.2745	232.989	-9.48872	-16.0731
1059	282.265	2.64142	-21.7796	-12.21	-10.0554	-15.4883	-15.2681	226.28	-9.4476	-16.0758
1060	270.911	2.39241	-22.0725	-12.1995	-10.0345	-15.4124	-15.262	219.803	-9.40806	-16.0786
1061	260.076	2.14698	-22.3619	-12.1892	-10.0141	-15.3384	-15.256	213.551	-9.37003	-16.0814
1062	249.732	1.90507	-22.6481	-12.1792	-9.99416	-15.2661	-15.2502	207.512	243.544	-16.0844
1063	239.855	1.66664	-22.9312	-12.1694	-9.97473	-15.1956	-15.2445	201.679	228.779	-16.0874
1064	230.42	1.43162	-23.2112	-12.1597	-9.95574	-15.1267	-15.239	196.042	214.965	-16.0906
1065	221.405	1.19995	-23.4883	-12.1503	-9.9372	-15.0595	-15.2336	190.592	202.036	-16.0937
1066	212.789	0.971592	-23.7625	-12.1411	-9.91907	-14.9939	-15.2284	185.323	189.928	-16.097
1067	204.551	0.74648	-24.0341	-12.1321	-9.90135	-14.9298	-15.2233	180.226	178.583	-16.1004
1068	196.672	0.524565	-24.303	-12.1232	-9.88402	-14.8672	-15.2183	175.294	167.949	-16.1038
1069	189.133	0.305795	-24.5694	-12.1146	-9.86707	-14.8061	-15.2135	170.52	157.974	-16.1073
1070	181.919	0.0901209	-24.8334	-12.1061	-9.85047	-14.7464	-15.2088	165.898	148.614	-16.1108
1071	175.013	-0.122508	-25.095	-12.0978	-9.83422	-14.688	-15.2042	161.422	139.827	-16.1144
1072	168.4	-0.332139	-25.3545	-12.0897	-9.8183	-14.631	-15.1997	157.084	131.573	-16.1181
1073	162.064	-0.53882	-25.6119	-12.0818	-9.8027	-14.5754	-15.1953	152.88	123.816	-16.1219
1074	155.993	-0.742598	-25.8673	-12.074	-9.78741	-14.5209	-15.1911	148.804	116.523	-16.1257
1075	150.174	-0.943517	-26.1208	-12.0664	-9.77241	-14.4678	-15.187	144.85	109.663	-16.1296
1076	144.594	-1.14162	-26.3725	-12.059	-25.7167	-14.4158	-15.1829	141.014	103.206	-16.1336
1077	139.242	-1.33696	-26.6225	-12.0517	-25.0216	-14.365	-15.179	137.29	97.1273	-16.1376
1078	134.106	-1.52957	-26.8709	-12.0446	-24.3594	-14.3153	-15.1752	133.675	91.401	-16.1417
1079	129.177	-1.7195	-27.1179	-12.0376	-23.7286	-14.2668	-15.1714	130.162	86.0046	-16.1458
1080	124.445	-1.90678	-27.3635	-12.0308	-23.1275	-14.2193	-15.1678	126.75	80.9168	-16.15
1081	119.899	-2.09146	-27.6078	-12.0242	-22.5545	-14.1728	-15.1642	123.432	76.1179	-16.1543
1082	115.533	-2.27358	-27.8509	-12.0177	-22.0084	-14.1274	-15.1608	120.206	71.5896	-16.1586
1083	111.336	-2.45318	-28.093	-12.0113	-21.4876	-14.083	-15.1574	117.067	67.3148	-16.163
1084	107.302	-2.63029	-28.3342	-12.005	-20.9909	-14.0395	-15.1541	114.013	63.2778	-16.1674
1085	103.422	-2.80495	-28.5746	-11.999	-20.5172	-13.997	-15.1509	111.039	-37.6753	-16.1719
1086	99.6898	-2.97721	-28.8142	-11.993	-20.0652	-13.9554	-15.1477	108.142	-35.9488	-16.1765
1087	96.0987	-3.14709	-29.0533	-11.9872	-19.6338	-13.9147	-15.1446	105.319	-34.3388	-16.1811
1088	92.642	-3.31463	-29.2918	-11.9815	-19.2221	-13.8748	-15.1416	102.567	-32.8369	-16.1857
1089	89.3138	-3.47987	-29.53	-11.9759	-18.8291	-13.8358	-15.1387	99.8838	-31.4352	-16.1904
1090	86.1083	-3.64284	-29.768	-11.9705	-18.4538	-13.7976	-15.1358	97.2657	-30.1266	-16.1951
1091	83.0201	-3.80358	-30.0059	-11.9651	-18.0954	-13.7602	-15.133	94.7103	-28.9045	-16.1999
1092	80.0439	-3.96211	-30.2438	-11.96	-17.753	-13.7236	-15.1303	92.2149	-27.7627	-16.2048
1093	77.1749	-4.11848	-30.4819	-11.9549	-17.4258	-13.6878	-15.1276	89.7771	-26.6955	-16.2096
1094	74.4084	-4.27271	-30.7202	-11.9499	-17.1132	-13.6527	-15.1249	87.3945	-25.6976	-16.2146
1095	71.74	-4.42484	-30.959	-11.9451	-16.8143	-13.6183	-15.1224	85.0648	-24.7642	-16.2195
1096	69.1654	-4.57489	-200.457	-11.9403	-16.5286	-13.5846	-15.1198	82.7857	-23.8908	-16.2245
1097	66.6807	-4.72289	-196.254	-11.9357	-16.2554	-13.5516	-15.1174	80.5551	-23.0731	-16.2296
1098	64.2821	-4.86889	-192.091	-11.9312	-15.9941	-13.5192	-15.1149	78.371	-22.3074	-16.2347
1099	61.9659	-5.0129	-187.972	-11.9268	-15.7441	-13.4875	-15.1126	76.2312	-21.5899	-16.2398
1100	59.7287	-5.15495	-183.901	-80.1572	-15.5049	-13.4564	-15.1102	74.1339	-20.9175	-16.245
1101	57.5673	-5.29507	-338.245	-77.2131	-15.2759	-13.426	-15.108	72.0771	-20.2869	-16.2502
1102	55.4785	-5.4333	-325.311	-74.4054	-15.0568	-13.3961	-15.1057	70.059	-19.6953	-16.2554
1103	53.4593	-5.56965	-312.759	-71.7277	-14.8469	-13.3668	-15.1035	68.0779	-19.1402	-16.2607
1104	51.507	-5.70416	-300.602	-69.1734	-14.6459	-13.3381	-15.1013	66.1319	-18.6189	-16.266
1105	49.6189	-5.83685	-288.851	-66.7366	-14.4534	-13.3099	-15.0992	64.2194	-18.1293	-16.2713
1106	47.7924	-5.96774	-277.511	-64.4115	-14.269	-13.2823	-15.0971	62.3387	-17.6692	-16.2767
1107	46.025	-6.09687	-266.583	-62.1928	-14.0922	-13.2552	-15.095	60.4881	-17.2367	-16.2821
1108	44.3144	-6.22426	-256.065	-60.0752	-13.9228	-13.2286	-15.093	58.6661	-16.8298	-16.2875
1109	42.6585	-6.34993	-245.951	-58.0538	-13.7603	-13.2026	-15.091	56.8711	-16.4469	-16.2929
1110	41.0551	-6.47391	-236.235	-56.124	-13.6045	-13.1769	-15.089	55.1015	-16.0865	-16.2984
1111	39.5022	-6.59622	-226.908	-54.2814	-13.4551	-13.1518	-15.0871	53.3557	-15.7469	-16.3039
1112	37.9978	-6.71689	-217.96	-52.5217	-13.3118	-13.1271	-15.0852	51.6322	-15.427	-16.3095
1113	36.5402	-6.83593	-209.381	-50.841	-13.1742	-13.1029	-15.0833	49.9296	-15.1254	-16.315
1114	35.1275	-6.95337	-201.16	-49.2354	-13.0422	-13.0791	-15.0814	48.2461	-14.8409	-16.3206
1115	33.7582	-7.06924	-193.284	-47.7014	-12.9154	-13.0558	-15.0796	46.5804	-14.5724	-16.3262
1116	32.4305	-7.18355	-185.742	-46.2356	-12.7936	-13.0328	-15.0777	44.9308	-14.3188	-16.3318
1117	31.143	-7.29633	-178.521	-44.8347	-12.6767	-13.0103	-15.0759	43.2957	-14.0794	-16.3374
1118	29.8942	-7.4076	-171.61	-43.4957	-12.5644	-12.9882	-15.0741	41.6736	-13.853	-16.3431
1119	28.6827	170.938	-164.996	-42.2155	-12.4564	-12.9664	-15.0724	40.0628	-13.639	-16.3487
1120	27.5071	165.697	-158.667	-40.9914	-12.3526	-12.945	-15.0706	38.4615	-13.4365	-16.3544
1121	26.3663	160.62	-152.612	-39.8208	-12.2529	-12.924	-15.0689	36.8682	-13.2448	-16.3601
1122	25.2588	155.697	-146.82	-38.7012	-12.1569	-12.9034	-15.0672	35.2809	-13.0633	-16.3659
1123	24.1837	150.921	-141.279	-37.6302	-12.0646	-12.8831	-15.0654	33.6977	-12.8912	-16.3716
1124	23.1397	146.286	-135.979	-36.6054	-11.9758	-12.8631	-15.0637	32.1166	-12.7281	-16.3773
1125	22.1258	141.783	-130.909	-35.6249	-11.8904	-12.8434	-15.0621	30.5356	-12.5734	-16.3831
1126	21.1409	137.407	-126.06	-34.6864	-11.8081	-12.8241	-15.0604	28.9524	-12.4265	-16.3888
1127	20.1841	133.151	-121.421	-33.7881	-11.7289	-12.8051	-15.0587	27.3646	-12.287	-16.3946
1128	19.2544	129.008	-116.984	-32.928	-11.6526	-12.7864	-15.057	25.7695	-12.1545	-16.4004
1129	18.3508	124.974	-112.739	-32.1045	-11.579	-12.768	-15.0554	24.1645	-12.0284	-16.4062
1130	17.4726	121.042	-108.678	-31.3159	-11.5082	-12.7499	-15.0537	22.5464	-11.9085	-16.412
1131	16.6189	117.206	-104.793	-30.5606	-11.4399	-12.7321	-15.0521	20.9118	-11.7944	-16.4178
1132	15.7889	113.463	-101.076	-29.837	-11.3741	-12.7145	-15.0504	19.257	-11.6857	-16.4236
1133	14.9817	109.805	-97.5188	-29.1437	-11.3106	-12.6973	-15.0488	17.5779	-11.5821	-16.4294
1134	14.1967	106.23	-94.115	-28.4794	289.402	-12.6803	295.86	15.8698	-11.4832	-16.4352
1135	13.4332	102.73	-90.8576	-27.8427	273.646	-12.6635	285.811	14.1274	-11.389	-16.441
1136	12.6904	99.3036	-87.7397	-27.2324	258.817	-12.647	276.161	12.3445	-11.2989	-16.4469
1137	11.9677	95.9442	-84.7553	-26.6473	244.855	-12.6307	266.891	10.5144	-11.2129	-16.4527
1138	11.2645	92.648	-81.8982	-26.0863	231.704	-12.6147	257.983	8.62871	-11.1307	-16.4585
1139	10.5802	89.4106	-79.1628	-25.5483	219.312	-12.5989	249.422	6.67807	-11.0521	-16.4643
1140	9.91409	86.2275	-76.5435	-25.0323	207.631	-12.5833	241.191	4.65113	-10.9768	-16.4701
1141	9.26572	83.0946	-74.0352	-24.5373	196.617	-12.568	233.276	2.53431	-10.9047	-16.4759
1142	8.63453	80.0076	-71.6328	-24.0624	186.226	-12.5529	225.662	-209.284	-10.8356	-16.4817
1143	8.01997	76.9622	-69.3316	-23.6068	176.421	-12.538	218.337	-208.249	-10.7693	-16.4875
1144	7.42156	73.9541	-67.127	-23.1694	167.164	-12.5232	211.287	-207.237	-10.7057	-16.4933
1145	6.8388	70.9788	-65.0148	-22.7497	158.422	-12.5087	204.499	-206.247	-10.6446	-16.4991
1146	6.27123	68.032	-62.9909	-22.3467	150.163	-12.4944	197.963	-205.28	-10.5859	-16.5049
1147	5.7184	65.109	-61.0511	-21.9599	142.358	-12.4803	191.668	-204.337	-10.5294	-16.5107
1148	5.17987	62.2051	-59.1919	-21.5884	134.978	-12.4663	185.602	-203.419	-10.4751	-16.5165
1149	4.65522	59.3152	-57.4097	-21.2316	127.998	-12.4526	179.756	-202.526	-10.4229	-16.5222
1150	4.14406	56.4341	-55.701	-20.8889	121.394	-12.439	174.12	-201.66	-10.3725	-16.528
1151	3.64599	53.5561	-54.0625	-20.5596	115.143	-12.4256	168.685	-200.821	-10.3239	-16.5337
1152	3.16063	50.6753	-52.4913	-20.2433	109.224	-12.4123	163.442	-200.011	-10.2771	-16.5394
1153	2.68763	47.7851	-50.9842	-19.9393	103.618	-12.3992	158.384	-199.23	-10.2318	-16.5451
1154	2.22662	44.8784	-49.5386	-19.6472	98.3067	-10.387	153.501	-198.48	-10.1882	-16.5508
1155	1.77728	41.9472	-48.1516	-19.3664	93.2721	-10.4192	148.787	-197.762	-10.1459	-16.5565
1156	1.33928	38.9825	-46.8208	-19.0965	88.4984	-10.4501	144.235	-197.078	-10.1051	-16.5622
1157	0.912301	35.9745	-45.5437	-18.8369	83.9706	-10.4799	139.837	-196.43	-10.0656	-16.5679
1158	0.496037	32.9115	-44.3179	-18.5874	79.6746	-10.5086	135.587	-195.818	-10.0273	-16.5735
1159	0.0901943	29.7804	-43.1413	-18.3473	75.5971	-10.5361	131.479	-195.245	-9.99016	-16.5791
1160	-0.305511	26.5654	-42.0117	-18.1165	71.7258	-10.5626	127.507	-194.714	-9.95418	-16.5847
1161	-0.691356	23.248	-40.9271	-17.8944	68.0491	-10.5881	123.666	-194.225	-9.91927	-16.5903
1162	-1.06761	19.8059	-39.8855	-17.6807	64.556	-10.6126	119.949	-193.782	-9.88537	-16.5959
1163	-1.43452	16.2118	-38.8851	-17.4751	61.2363	-10.6361	116.352	-193.388	-9.85243	-16.6014
1164	-1.79234	12.4316	-37.9241	-17.2772	58.0805	-10.6588	112.871	-193.045	-9.82042	-16.6069
1165	-2.14132	8.42214	-37.0009	-17.0867	55.0796	-10.6806	109.499	-192.758	-9.78927	-16.6125
1166	-2.48169	4.12743	-36.1138	-16.9034	52.225	-10.7015	106.233	-192.529	-9.75896	-16.6179
1167	-2.81367	-0.526896	-35.2614	-16.7269	49.509	-10.7217	103.069	-192.363	-9.72943	-16.6234
1168	-3.13748	-5.64264	-34.4421	-16.5569	46.9239	-10.7411	100.003	-192.265	-9.70066	-16.6288
1169	-3.45334	-11.3641	-33.6545	-16.3932	44.4628	-10.7597	97.0295	-192.24	-9.67261	-16.6343
1170	-3.76145	-17.9047	-32.8974	-16.2356	42.1191	-10.7776	94.1464	-192.295	-9.64524	-16.6396
1171	-4.06201	-25.5985	-32.1694	-16.0837	39.8866	-10.7948	91.3497	-192.435	-9.61852	-16.645
1172	-4.35521	-35.0063	-31.4694	-15.9375	37.7594	-10.8113	88.636	-192.67	-9.59243	-16.6503
1173	-4.64124	-47.1676	-30.7961	-15.7965	35.732	-10.8272	86.0021	-193.009	-9.56692	-16.6557
1174	-4.92028	158.295	-30.1485	-15.6607	33.7993	-10.8425	83.445	-193.461	-9.54199	-16.661
1175	-5.19251	156.729	-29.5254	-15.5298	31.9563	-10.8572	80.9616	-194.04	-9.5176	-16.6662
1176	-5.45809	155.176	-28.926	-15.4037	30.1984	-10.8713	78.5493	-194.76	-9.49372	-16.6714
1177	-5.7172	153.635	-28.3491	-15.2821	28.5213	-10.8848	76.2052	-195.638	-9.47034	-16.6766
1178	-5.96999	152.107	-27.794	-15.1648	26.921	-10.8978	73.9268	-196.696	-9.44743	-16.6818
1179	-6.21662	148.494	-27.2596	-15.0518	25.3935	-10.9102	71.7118	-197.958	-9.42497	-16.687
1180	-6.45724	144.98	-26.7452	258.69	23.9351	-10.9222	69.5577	-199.455	-9.40294	-16.6921
1181	-6.692	141.562	-26.2499	245.569	22.5425	-10.9337	67.4622	-201.225	-9.38133	-16.6972
1182	-6.92104	138.235	-25.773	233.17	21.2123	-10.9447	65.4233	-203.317	-9.36011	-16.7022
1183	-139.929	134.998	-25.3137	221.448	19.9416	-10.9553	63.4389	-205.792	-9.33927	-16.7072
1184	-135.722	131.847	-24.8714	210.363	18.7273	-10.9654	61.507	-208.73	-9.3188	-16.7122
1185	-131.644	128.779	-24.4452	199.875	17.5667	-10.9751	59.6257	-212.241	-9.29867	-16.7172
1186	-127.692	125.791	-24.0347	189.948	16.4573	-10.9844	57.7932	-216.472	-9.27888	-16.7221
1187	-123.864	122.882	-23.6391	180.548	15.3966	-10.9933	56.0079	-202.37	-9.25941	-16.727
1188	-120.157	120.047	-23.2579	171.644	14.3821	-11.0018	54.268	-216.344	-9.24024	-16.7318
1189	-116.568	117.286	-22.8904	163.206	13.4118	-11.01	52.5719	-233.505	-9.22137	-16.7367
1190	-113.094	114.595	-22.5363	155.207	12.4836	-11.0178	50.9181	-255.451	-9.20279	-16.7414
1191	-109.733	111.973	-22.1949	147.62	11.5953	-11.0253	49.3053	307.005	-9.18447	-16.7462
1192	-106.481	109.417	-21.8657	140.422	10.7453	-11.0324	47.7318	304.27	-9.16642	-16.7509
1193	-103.335	106.924	-21.5482	133.59	9.9316	-11.0392	46.1965	301.557	-9.14862	-16.7556
1194	-214.13	104.494	-21.2421	127.102	9.15262	-11.0457	44.6981	298.867	-9.13106	-16.7602
1195	-204.33	102.124	-20.9468	120.94	8.40673	-11.0519	43.2352	296.198	-9.11373	-16.7648
1196	-195.004	99.8113	-20.662	115.083	7.69242	-11.0578	41.8068	282.737	-9.09663	-16.7694
1197	-186.13	97.5554	-20.3871	109.516	7.00823	-11.0634	40.4116	269.954	-9.07974	-16.7739
1198	-177.691	95.3541	-20.122	104.222	6.3528	-11.0688	39.0486	257.811	-9.06306	-16.7784
1199	-169.666	93.2056	-19.8661	99.1845	5.72482	-11.0738	37.7167	246.271	-9.04658	-16.7828
1200	-162.036	91.1083	-19.6191	94.3905	5.12306	-11.0787	36.4149	235.3	-9.03029	-16.7872
1201	-154.783	89.0608	-19.3808	89.8262	4.54633	-11.0833	35.1422	224.865	-9.01419	-16.7916
1202	-147.889	87.0613	-19.1507	85.479	3.99353	-11.0876	33.8977	214.937	-8.99826	-16.7959
1203	-141.336	85.1086	-18.9285	81.3372	3.46359	-11.0917	32.6806	205.487	-8.98251	-16.8002
1204	-135.109	83.2011	-18.7139	77.3896	2.9555	-11.0956	31.4898	196.489	-8.96692	-16.8044
1205	-129.19	81.3376	-18.5068	73.6258	2.4683	-11.0993	30.3246	187.917	-8.9515	-16.8086
1206	-123.564	79.5166	-18.3067	70.036	2.00106	-11.1027	29.1842	179.748	-80.249	-16.8128
1207	-118.217	77.737	-18.1134	66.611	1.55293	-11.106	28.0679	171.959	-76.5724	-50.8068
1208	-113.134	75.9975	-17.9267	63.3422	1.12307	-11.109	26.9747	164.531	-73.0987	-49.8019
1209	-108.303	74.2969	-17.7462	60.2214	0.710692	-11.1119	25.9042	157.443	-69.8161	-48.8277
1210	-103.71	72.6341	-17.5719	57.2411	0.315041	-11.1146	24.8554	150.677	-66.7135	-47.8832
1211	-99.3437	71.008	-17.4034	54.3939	-0.0645975	-11.1171	23.8279	144.216	-63.7804	-46.9674
1212	-95.1918	69.4175	-17.2406	51.6731	-0.428907	-11.1194	22.8209	138.043	-61.0071	-46.0793
1213	-91.2436	67.8617	-17.0832	49.0723	-0.778539	-11.1215	21.8337	132.144	-58.3843	-45.2181
1214	-87.4887	66.3394	-16.931	46.5855	-1.11411	-11.1235	-117.999	126.503	-55.9033	-44.3828
1215	-83.9172	64.8498	-16.7839	44.207	-1.43623	-11.1253	34.8991	121.108	-53.5561	-43.5725
1216	-80.5197	63.3919	-16.6417	41.9314	-1.74544	-11.127	31.5757	115.946	-51.3349	-42.7866
1217	-77.2872	61.9649	-16.5041	39.7537	-2.04229	-11.1285	28.4212	111.004	-49.2326	-42.0242
1218	-74.2113	60.5679	-16.371	37.6691	-2.32729	-11.1299	25.4257	106.271	-47.2423	-41.2844
1219	-71.284	59.2	-16.2423	35.6732	-2.60094	-11.1311	22.58	101.737	-45.3577	-40.5667
1220	-68.4977	57.8605	-16.1178	33.7616	-2.8637	-11.1322	19.8754	97.3912	-43.5728	-39.8702
1221	-65.8452	56.5485	-15.9973	31.9303	-3.11603	-11.1331	17.3039	93.225	-41.8819	-39.1942
1222	-63.3196	55.2633	-15.8807	30.1755	-3.35834	-11.1339	14.858	89.2291	-40.2798	-38.5382
1223	-60.9145	54.0043	-15.7679	28.4936	-3.59105	-11.1346	12.5307	85.3951	-38.7615	-37.9015
1224	-58.6239	52.7706	-15.6587	26.8812	-3.81454	-11.1352	10.3155	81.715	-37.3222	-37.2834
1225	-56.4417	51.5616	-36.8103	25.3352	-4.0292	-11.1356	8.20631	78.1815	-35.9576	-36.6833
1226	-54.3627	50.3766	-35.7232	23.8523	-4.23537	-11.1359	6.19741	74.7875	-34.6635	-36.1008
1227	-52.3815	49.2151	-34.6873	22.4298	-4.4334	-11.1361	4.28345	71.5262	-33.436	-35.5351
1228	-50.4933	48.0763	-33.7	21.0649	-4.62362	-11.1362	2.45944	68.3915	-32.2713	-34.9858
1229	-48.6933	46.9598	-32.7588	19.755	199.715	-11.1362	0.720703	65.3774	-31.1661	-34.4524
1230	-46.9772	45.8649	-31.8614	18.4976	189.212	-11.1361	-0.937167	62.4783	-30.1171	-33.9344
1231	-45.3407	44.791	-31.0057	17.2905	179.281	-11.1358	-2.51829	59.6888	-29.1211	-33.4312
1232	-43.7799	43.7377	-30.1896	16.1312	169.884	-11.1355	-4.02655	57.004	-28.1754	-32.9424
1233	-42.291	42.7044	-29.411	15.0179	160.988	-11.1351	-5.46557	54.4191	-27.2771	-32.4676
1234	-40.8704	41.6906	-28.6681	13.9484	152.56	-11.1346	-6.83878	51.9296	-26.4237	-32.0063
1235	-39.5148	40.6957	-27.9592	12.9209	144.57	-11.1339	-8.14941	49.5312	-25.6127	-31.5581
1236	-38.2209	39.7194	-27.2826	11.9335	136.99	-11.1332	-9.40049	47.22	-24.8419	-31.1226
1237	-36.9858	38.7612	-26.6367	10.9845	129.796	-11.1324	-10.5949	44.9921	-24.1092	-30.6993
1238	-35.8064	37.8206	-26.02	10.0723	122.963	-11.1316	-11.7353	42.8439	-23.4124	-30.288
1239	-34.6802	36.8973	-25.4311	9.19537	116.469	-11.1306	-12.8242	40.7719	-22.7497	-29.8882
1240	-33.6045	35.9906	-24.8686	8.35217	110.293	-11.1295	-13.8641	38.773	-22.1193	-29.4996
1241	-32.5769	35.1004	-24.3313	7.5413	104.416	-11.1284	-14.8572	36.844	-21.5195	-29.1219
1242	-31.5949	34.2261	-23.8179	6.76143	98.8203	-11.1272	-15.8056	34.9819	-20.9485	-28.7547
1243	-30.6565	33.3675	-23.3273	6.01126	93.4892	-11.1259	-16.7114	33.1841	-20.4051	-28.3976
1244	-29.7596	32.524	-22.8583	5.28958	88.4071	-11.1245	-17.5765	31.4478	-19.8876	-28.0504
1245	-28.902	31.6955	-22.4101	4.59522	83.5594	-11.1231	-18.4028	29.7705	-19.3947	-27.7128
1246	-28.082	30.8814	-21.9815	3.92707	78.9328	-11.1216	-19.1919	28.15	-18.9252	-27.3845
1247	-27.2978	30.0816	-21.5716	3.28408	74.5145	-11.12	-19.9454	26.5837	-18.4778	-27.0652
1248	-26.5477	29.2956	-21.1796	2.66522	229.592	-11.1183	-20.665	25.0697	-65.0387	-26.7546
1249	-25.8299	28.5231	-20.8047	2.06954	213.984	-11.1166	-21.352	23.6059	-61.7848	-26.4525
1250	-25.1431	27.7639	-20.4459	1.49611	199.325	-11.1148	-22.0079	22.1902	-58.7335	-26.1586
1251	-24.4858	27.0176	-20.1026	0.944055	185.537	-11.113	-22.6339	20.8209	-55.8714	-25.8727
1252	-23.8565	26.2839	-19.774	0.412528	172.549	-11.1111	-23.2315	19.4961	-53.186	-25.5945
1253	-23.254	25.5626	-32.615	-0.0992736	160.293	-11.1091	-23.8016	18.2142	-50.6659	-25.3238
1254	-22.677	24.8534	-31.4802	-0.592119	148.712	-9.83973	-24.3456	16.9735	-48.3002	-25.0604
1255	-22.1243	24.156	-30.4109	-1.06674	137.75	-9.88606	-24.8644	15.7724	-46.0789	-24.8041
1256	-21.5949	23.4702	-29.4032	-1.52385	127.357	-9.93035	-25.359	14.6096	-43.9926	-24.5546
1257	-21.0875	22.7957	-28.4533	-1.96412	117.487	-9.9727	-25.8306	13.4836	-42.0326	-24.3118
1258	-20.6013	22.1322	-27.5575	-2.38818	108.099	-10.0132	-26.2799	12.3931	-40.1907	-24.0754
1259	-20.1352	21.4796	-26.7128	-2.79667	99.1542	-10.0519	108.553	11.3367	-38.4595	-23.8453
1260	-19.6884	20.8376	-25.9158	-3.19016	90.6164	-10.0889	99.9305	10.3133	-36.8318	-23.6212
1261	-19.2599	20.2059	-25.1639	-3.56922	82.4534	-10.1242	91.7489	9.32166	-35.301	-23.4031
1262	-18.8489	19.5844	-24.4542	-3.9344	74.6351	-10.158	83.9756	8.36067	-33.861	-23.1907
1263	-18.4547	18.9729	-23.7842	-4.28622	-101.627	-10.1903	76.5805	7.42927	-32.506	-22.9839
1264	-18.0764	18.371	-23.1516	-4.62517	-98.8955	-10.2212	69.5358	6.52641	-31.2307	-22.7825
1265	-17.7134	17.7788	-22.5542	-4.95173	-96.2856	-10.2508	62.816	5.65112	-30.03	-22.5863
1266	-17.365	17.1958	-21.9897	-5.26636	-93.7915	-10.279	56.3977	4.80245	-28.8994	-22.3952
1267	-17.0304	16.622	-21.4564	-5.5695	-91.4076	-10.306	50.2592	3.97951	-27.8344	-22.2091
1268	-16.7092	16.0572	-20.9524	-5.86157	-89.1286	-10.3318	44.3806	3.18141	-26.8309	-22.0278
1269	-16.4007	15.5011	-20.4759	-6.14297	-86.9498	-10.3564	38.7433	2.40734	-25.8852	-21.8512
1270	-16.1044	14.9537	-20.0254	-6.41409	-84.8661	-10.38	33.3302	1.6565	-24.9937	-21.6791
1271	-15.8196	14.4147	-19.5993	-6.67531	-82.873	-10.4025	28.1255	0.928117	-24.153	-21.5114
1272	-15.546	13.884	-19.1963	-6.92698	-80.9662	-10.424	23.1145	0.221464	-23.3601	-21.348
1273	-15.283	13.3613	-18.8149	-7.16944	-79.1414	-10.4445	18.2833	-0.464165	-22.612	-21.1888
1274	-15.0301	12.8467	-18.454	-7.40303	-77.3947	-10.4641	13.6192	-1.12945	-21.9061	-21.0336
1275	-14.787	12.3398	-18.1124	-7.62807	-75.7221	-10.4829	9.11013	-1.77503	-21.2397	-20.8823
1276	-14.5532	11.8406	-17.7889	-7.84485	-74.1201	-10.5008	4.74493	-2.40155	-20.6104	-20.7349
1277	-14.3282	11.3489	-17.4825	-8.05367	-72.5851	-10.5178	0.513006	-3.00959	-20.0161	-20.5912
1278	-14.1118	10.8645	-17.1924	-8.25482	-71.1139	-10.5341	-3.59559	-3.59973	-19.4547	-20.4511
1279	-13.9035	-111.515	-16.9174	-8.44856	-69.7033	-10.5497	-7.59027	-4.17254	-18.9242	-20.3145
1280	-13.703	-109.06	-16.6569	-8.63515	-68.3504	-10.5645	-11.48	-4.72855	-18.4227	-20.1813
1281	-13.51	-106.667	-16.41	-8.81485	-67.0522	-10.5787	-15.2732	-5.26826	-17.9485	-20.0515
1282	-13.3242	-104.336	-16.1758	-8.9879	-65.8061	-10.5922	-18.978	-5.79218	-17.5001	-19.9248
1283	-13.1452	-102.066	-15.9538	-9.15452	-64.6095	-10.605	-22.6023	-6.30079	-17.0759	-19.8014
1284	-12.9727	-99.8549	-15.7432	-9.31495	-63.4599	-10.6173	-26.1535	-6.79454	-16.6745	-19.6809
1285	-12.8065	-97.7021	-15.5435	-9.4694	-62.3552	-10.629	-29.6389	-7.27388	-16.2945	-19.5634
1286	-12.6464	-95.6064	-15.3539	-9.61807	-61.2929	-10.6401	-33.0655	-7.73923	-15.9348	-19.4489
1287	-12.492	-93.5664	-15.174	-9.76116	-60.2711	-10.6507	-36.4405	-8.19101	-15.5941	-19.3371
1288	-12.3432	-91.581	-15.0032	-9.89887	-59.2878	-10.6607	-39.7705	-8.62961	-15.2714	-19.228
1289	-12.1996	-89.649	-14.841	-10.0314	-58.3412	-10.6703	-43.0623	-9.05543	-14.9656	-19.1216
1290	-12.0612	-87.7691	-14.687	-10.1589	-57.4293	-10.6794	-46.3228	-9.46881	-14.6758	-19.0178
1291	-11.9276	-85.9402	-14.5407	-10.2815	-56.5506	-10.688	-49.5588	-9.87014	-14.401	-18.9166
1292	-11.7986	-84.1609	-14.4017	-10.3995	-55.7034	-10.6962	-52.7771	-10.2597	-14.1404	-18.8177
1293	-11.6742	-82.43	-14.2696	-10.5129	-54.8863	-10.704	-55.9849	-10.638	-13.8931	-18.7213
1294	-11.5541	-80.7465	-14.1441	-10.622	-54.0977	-10.7113	-59.1894	-11.0051	-13.6585	-18.6271
1295	-11.438	-79.109	-14.0247	-10.7268	-53.3363	-10.7183	-62.3982	-11.3615	-13.4359	-18.5352
1296	-11.326	-77.5165	-13.9112	-10.8276	-52.6008	-10.7249	-65.6191	-11.7075	-13.2244	-18.4455
1297	-11.2177	-75.9677	-13.8032	-10.9244	-51.8901	-10.7311	-68.8607	-12.0432	-13.0236	-18.358
1298	-11.1131	-74.4616	-13.7005	-11.0174	-51.2028	-10.737	-72.1318	-12.3691	-12.8329	-18.2725
1299	-11.0119	-72.9969	-13.6027	-11.1067	-50.538	-10.7426	-75.442	-12.6854	-12.6516	-18.189
1300	-10.9142	-71.5727	-13.5097	-11.1925	-49.8945	-10.7478	-78.8017	-12.9924	-12.4792	-18.1076
1301	-10.8196	-70.1878	-13.4211	-11.2749	-49.2715	-10.7527	-82.2225	-13.2903	-12.3154	-18.028
1302	-10.7282	-68.8411	-13.3368	-11.3539	-200.133	-10.7573	-85.7168	-13.5793	-12.1595	-17.9503
1303	-10.6397	-67.5316	-13.2565	-11.4297	-188.589	-10.7616	-89.2989	-13.8597	-12.0112	-17.8744
1304	-10.554	-66.2584	-13.18	-11.5024	-177.737	-10.7657	-92.9844	-14.1317	-11.87	-17.8003
1305	-10.4712	-65.0204	-13.1071	-11.5721	-167.545	-10.7695	-96.7915	-14.3956	-11.7357	-17.7279
1306	-10.3909	-63.8167	-13.0376	-11.6389	-157.978	-10.773	-100.741	-14.6516	-11.6077	-17.6572
1307	-10.3132	-62.6462	-12.9714	-11.703	-149.004	-10.7762	-104.856	-14.8998	-11.4857	-21.9105
1308	-10.2379	-61.5081	-12.9083	-11.7643	-140.591	-10.7793	-109.165	-15.1405	-11.3695	-21.594
1309	-10.1649	-60.4015	-12.8481	-11.823	-132.705	-10.7821	-113.702	-15.3739	-11.2587	-21.2898
1310	-10.0942	-59.3254	-12.7907	-11.8791	-125.317	-10.7846	-118.505	-15.6002	-11.1531	-20.9974
1311	-10.0257	-58.2791	-12.7359	-11.9328	-118.397	-10.787	-123.623	-15.8196	-11.0523	-20.7163
1312	-9.9592	-57.2617	-12.6836	-11.9842	-111.916	-10.7891	-129.115	-16.0321	-10.9561	-20.446
1313	-9.89473	-56.2724	-12.6337	-12.0333	-105.848	-10.7911	-135.054	-16.2381	-10.8643	-20.186
1314	-9.83217	-55.3103	-12.5861	176.43	-100.165	-10.7928	-141.535	-16.4377	-10.7766	-19.936
1315	-9.77146	-54.3747	-12.5406	168.392	-94.8448	-10.7944	-148.68	-16.631	-10.6929	-19.6955
1316	-9.71253	-53.4649	-12.4971	160.722	-89.8633	-10.7958	-156.648	-16.8183	-10.6128	-19.4641
1317	-9.6553	-52.5802	-12.4556	153.397	-85.1988	-10.797	-165.662	-16.9996	-10.5363	-19.2415
1318	-9.59972	-51.7197	-12.4159	146.397	-80.8309	-10.798	-176.03	-17.1752	-10.4631	-19.0272
1319	-9.54571	-50.8829	-12.378	139.705	-76.7403	-10.7989	-438.403	-17.3451	-10.393	-18.821
1320	-9.49323	-50.069	-12.3418	133.301	-72.9088	-10.7996	-446.237	-17.5095	-10.326	-18.6226
1321	-9.44222	-49.2773	-12.3071	127.17	-69.3197	-10.8002	-456.227	-17.6685	-10.2618	-18.4315
1322	-9.39261	-48.5074	-12.2739	121.295	-65.9568	-10.8006	-469.129	-17.8224	-10.2003	-18.2476
1323	-9.34436	-47.7585	-12.2422	115.663	-62.8055	-10.8008	-486.148	-17.9712	-10.1414	-18.0704
1324	-9.29742	-47.03	-12.2118	110.26	-59.8517	-10.801	-509.335	-18.115	-10.0849	-17.8999
1325	-9.25174	-46.3214	-12.1828	105.073	-57.0825	-10.801	255.336	-18.254	-10.0308	-17.7356
1326	264.281	-45.632	-12.155	100.09	-54.4857	-10.8008	252.891	-18.3883	-9.9788	-17.5773
1327	251.548	-44.9614	-12.1283	95.3001	-52.0501	-10.8005	250.467	-18.518	-9.9289	-17.4249
1328	239.49	-44.309	-12.1028	90.6925	-49.7649	-10.8002	248.063	-18.6432	-9.88099	-17.278
1329	228.068	-43.6743	-12.0783	86.2574	-47.6203	-10.7997	245.68	-18.764	-9.83496	-17.1365
1330	217.243	-43.0568	-12.0549	81.9855	-45.6071	-10.799	231.606	-18.8806	-9.79071	-17.0001
1331	206.981	-42.4559	-12.0324	77.868	-43.7167	-10.7983	218.385	-18.9931	-9.74816	-16.8686
1332	197.247	-41.8713	-12.0108	73.8968	-41.9411	-10.7975	205.958	-19.1015	-9.70723	-16.7419
1333	188.012	-41.3024	-11.9901	70.0641	-40.2728	-10.7965	194.274	-19.206	-9.66783	-16.6197
1334	179.247	-40.7489	-11.9703	66.3626	-38.7048	-10.7955	183.283	-19.3066	-9.62988	-16.5019
1335	170.924	-40.2102	-11.9513	62.7855	-37.2306	-10.7943	172.939	-19.4035	-9.59332	-16.3883
1336	163.017	-39.686	-11.933	59.3263	-35.8441	-10.7931	163.202	-19.4967	-9.55809	-16.2787
1337	155.504	-39.1758	-11.9154	55.9789	-34.5397	-10.7917	154.03	-19.5863	-9.5241	-16.1731
1338	148.361	-38.6793	-11.8985	52.7376	-33.3121	-10.7903	145.388	-19.6725	-9.49131	-16.0711
1339	141.567	-38.196	-11.8823	49.5968	-32.1564	-10.7888	137.242	-19.7553	-9.45965	-15.9728
1340	135.104	-37.7256	-11.8667	46.5515	-31.068	-10.7872	129.561	-19.8347	-9.42907	-15.8779
1341	128.952	-37.2678	-11.8517	43.5968	-30.0425	-10.7855	122.314	-19.911	-9.39952	-15.7864
1342	123.095	-36.8221	-11.8373	40.728	-29.076	-10.7837	115.474	-19.9841	-9.37095	-15.698
1343	117.515	-36.3883	-11.8234	37.9408	-28.1648	-10.7819	109.017	-20.0541	-9.34331	-15.6128
1344	112.199	-35.9659	-11.8101	35.231	-27.3054	-10.78	102.918	-20.1212	-9.31656	-15.5305
1345	107.13	-35.5548	-11.7972	32.5947	-26.4944	-10.778	97.1548	-20.1853	-9.29064	-15.451
1346	102.297	-35.1545	-11.7848	30.0281	-25.729	-10.7759	91.7072	-20.2466	-9.26554	-15.3743
1347	97.6869	-34.7648	-11.7729	27.5276	-25.0062	-10.7737	86.556	-20.3051	-9.24119	-15.3002
1348	93.287	-34.3853	-11.7614	25.0899	-24.3235	-10.7715	81.683	-20.3609	-9.21758	-15.2287
1349	89.0865	-34.0159	-11.7502	22.7116	-23.6782	-10.7692	77.0716	-20.4141	-9.19466	-15.1596
1350	85.0751	-33.6561	-11.7395	20.3896	-23.0682	-10.7669	72.7062	-20.4647	-9.1724	-15.0929
1351	81.2428	-33.3058	-11.7292	18.121	-22.4913	-10.7645	68.5721	-20.5128	-9.15077	-15.0284
1352	77.5804	-32.9647	-11.7192	15.9028	-123.914	-10.762	64.6557	-20.5585	-9.12974	-14.9661
1353	74.0791	-32.6325	-11.7096	13.7324	-116.11	-10.7595	60.9443	-20.6017	-9.10928	-14.9059
1354	70.7308	-32.309	-11.7003	11.6071	-108.865	-10.7569	57.4258	-20.6427	-9.08937	-14.8478
1355	67.5276	-31.9939	-11.6913	9.52435	-102.139	-10.7542	54.0892	-20.6814	-9.06997	-14.7916
1356	64.4623	-31.6871	-11.6826	7.48162	-95.8922	-10.7515	50.924	-20.7179	-9.05107	-14.7373
1357	61.528	-31.3882	-11.6741	5.47655	-90.0907	-10.7487	47.9203	-20.7522	-9.03265	-14.6848
1358	58.7183	-31.0971	-11.666	3.50682	-84.7014	-10.7459	45.0692	-20.7845	-9.01467	-14.634
1359	56.0269	-30.8136	-11.6581	1.57015	-79.6939	-10.743	42.3618	-20.8147	-8.99712	-14.5849
1360	53.4482	-30.5374	-11.6504	-0.335648	-75.04	-10.7401	39.7903	-20.8429	-8.97998	-14.5375
1361	50.9766	-30.2684	-11.643	-2.21276	-70.7138	-10.7371	37.347	-20.8692	-8.96322	-14.4916
1362	48.6071	-30.0063	-11.6358	-4.0633	-66.6913	-10.7341	35.0248	-20.8936	-8.94684	-14.4472
1363	46.3348	-29.751	-11.6289	-5.88938	-62.95	-10.731	32.8171	-20.9162	-8.93082	-14.4043
1364	44.1551	-29.5023	-11.6221	-7.69306	-59.4694	-10.7279	30.7177	-20.9369	-8.91513	-14.3628
1365	42.0635	-29.2601	-11.6155	-9.47641	-56.2305	-10.5233	28.7206	-20.956	-8.89976	-14.3226
1366	40.0562	-29.024	-11.6091	-11.2415	-53.2156	-10.5344	26.8204	-20.9733	-8.8847	-14.2837
1367	38.129	-28.794	-11.6029	-12.9903	-50.4083	-10.5449	25.0118	-20.989	-8.86993	-14.2461
1368	36.2784	-28.57	-11.5969	-14.725	-47.7937	-10.5548	23.29	-21.0031	-8.85544	-14.2097
1369	34.5009	-28.3516	-11.591	-16.4477	-45.3577	-10.5641	21.6504	-21.0156	-8.84122	-14.1745
1370	32.7931	-28.1389	-11.5853	-18.1604	-43.0875	-10.5728	20.0886	-21.0265	-8.82725	-14.1404
1371	31.152	-27.9317	-11.5797	-19.8653	-40.9712	-10.5811	18.6006	-21.036	-8.81352	-14.1074
1372	29.5746	-27.7297	-11.5743	-21.5646	-38.9976	-10.5888	17.1825	-21.0441	-8.80002	-14.0755
1373	28.058	-27.5329	-11.569	-23.2606	-37.1566	-10.596	15.8307	-21.0507	-8.78675	-14.0445
1374	26.5996	-27.3412	-11.5638	-24.9558	-35.4387	-10.6028	14.5418	-21.056	-8.77368	-14.0146
1375	25.1969	-27.1543	-11.5588	-26.6524	-33.8353	-10.6091	13.3126	-21.06	-8.76081	-13.9855
1376	23.8474	-72.2199	-11.5539	-28.3531	-32.3381	-10.615	12.14	-21.0626	-8.74813	-13.9574
1377	22.5489	-70.2087	-11.549	-30.0607	-30.9397	-10.6205	11.0212	-21.064	-8.73563	-13.9302
1378	21.2992	-68.276	-11.5443	-31.7779	-29.6331	-10.6256	9.95349	-21.0642	-8.72331	-13.9038
1379	20.0963	-66.4187	-11.5397	-33.5079	-28.412	-10.6304	8.93428	-21.0632	-8.71115	-13.8783
1380	18.9381	-64.6334	-11.5352	-35.2539	-27.2703	-10.6348	7.96116	-21.061	-8.69915	-13.8535
1381	17.8228	-62.9173	-11.5308	-37.0194	-26.2026	-10.6389	7.03185	-21.0578	-8.6873	-13.8295
1382	16.7486	-61.2676	-11.5265	-38.8083	-25.2037	-10.6427	6.1442	-21.0534	-8.67559	-13.8063
1383	15.7139	-59.6813	-11.5222	-40.6247	-24.2689	-10.6461	5.29615	-21.048	-8.66401	-13.7837
1384	14.7169	-58.156	-11.5181	-42.4731	-23.3937	-10.6493	-86.6044	-21.0415	-8.65257	-13.7619
1385	13.7563	-56.6892	-11.514	-44.3587	-22.5742	-10.6522	-82.6037	-21.0341	-8.64124	-13.7407
1386	12.8305	-55.2783	-11.51	-46.287	-21.8064	-10.6548	-78.8343	-21.0256	-8.63004	-13.7202
1387	11.9382	-53.9212	-11.506	-48.2642	-21.0869	-10.6571	-75.2825	-21.0163	-8.61895	-13.7003
1388	11.0779	-52.6157	-11.5021	-50.2974	-20.4125	-10.6592	-71.9352	-21.006	-8.60796	-13.6809
1389	10.2485	-51.3596	-11.4983	-52.3945	-19.78	-10.6611	-68.78	-20.9949	-8.59707	-13.6622
1390	9.44869	-50.1509	-11.4946	-54.5646	-19.1867	-10.6628	-149.78	-20.9829	-8.58628	-13.644
1391	8.67737	-48.9878	-11.4909	-56.8182	-18.63	-10.6642	-140.372	-20.97	-8.57558	-13.6264
1392	7.93342	-47.8683	-11.4872	-59.1673	-18.1074	-10.6654	-131.64	-20.9564	-8.56497	-13.6093
1393	7.21578	-46.7908	-11.4836	-61.6261	-17.6167	-10.6664	-123.535	-20.942	-8.55444	-13.5927
1394	6.52346	-45.7534	-11.4801	-64.2113	-17.1558	-10.6673	-116.01	-20.9268	-8.54399	-13.5766
1395	179.113	-44.7547	-11.4766	-66.9429	-16.7227	-10.6679	-109.022	-20.9109	-8.53361	-13.5609
1396	169.455	-43.7931	-11.4731	-69.8447	-16.3155	-10.6684	-102.532	-20.8943	-8.5233	-13.5457
1397	160.289	-42.8671	-11.4697	-72.9462	-15.9327	-10.6687	-96.5035	-20.877	-8.51306	-13.531
1398	151.582	-41.9753	-11.4663	-76.2835	-15.5726	-10.6688	-90.9013	-20.859	-8.50288	-13.5167
1399	143.305	-41.1163	-11.463	-79.9024	-15.2338	-10.6688	-85.6946	-20.8404	-8.49276	-13.5028
1400	135.428	-40.2888	-11.4597	-83.8613	-14.9148	-10.6686	-80.8541	-20.8212	-8.4827	-13.4893
1401	127.926	-39.4916	-11.4564	-88.2365	-14.6145	-10.6683	-76.3529	-140.052	-8.4727	-13.4761
1402	120.774	-38.7235	-11.4531	-93.1304	-14.3316	-10.6678	-72.1663	-253.514	-8.46274	-13.4634
1403	113.949	-37.9834	-11.4499	-98.6844	217.096	-10.6672	-68.2711	-242.701	-8.45283	-13.451
1404	107.432	-37.2701	-11.4468	-105.1	200.672	-10.6665	-64.6461	-232.368	-8.44297	-13.439
1405	101.201	-36.5827	-11.4436	-112.68	185.526	-10.6657	-61.2716	-222.501	-8.43315	-13.4273
1406	95.2398	-35.92	-11.4405	-121.9	171.548	-10.6647	-58.1295	-213.081	-8.42337	-13.4159
1407	89.5305	-35.2813	-11.4373	-133.575	158.64	-10.6636	-55.2029	-204.093	-8.41363	-13.4049
1408	84.0578	-34.6654	-11.4343	133.776	146.712	-10.6624	-52.4764	-195.517	-8.40392	-13.3941
1409	78.8068	-34.0716	-11.4312	132.413	135.683	-10.6611	-49.9355	-187.338	-8.39425	-13.3837
1410	73.7641	-33.499	-11.4281	131.061	125.479	-10.6597	-47.5669	-179.539	-8.38461	301.626
1411	68.9169	-32.9469	-11.4251	129.72	116.031	-10.6582	-45.3584	-172.103	-8.375	288.452
1412	64.2532	-32.4143	-11.4221	128.391	107.278	-10.6566	-43.2985	-165.013	-8.36541	275.917
1413	59.762	-31.9006	-11.4191	124.689	99.1651	-10.6549	-41.3767	-158.255	-8.35586	252.833
1414	55.4328	-31.405	-11.4161	121.102	91.6401	-10.6531	-39.5833	-151.813	-8.34632	237.931
1415	51.2558	-30.9269	-11.4131	117.627	84.6566	-10.6513	-37.9092	-145.672	-8.33681	223.957
1416	47.2219	-30.4657	-11.4101	114.26	78.1721	-10.6493	-36.3461	-139.818	-8.32732	210.848
1417	43.3224	-30.0206	-11.4072	73.0338	72.1475	-10.6473	-34.8862	-134.238	-8.31785	198.546
1418	39.5494	-29.591	-11.4042	69.5448	66.5473	-10.6451	-33.5223	-128.918	-8.30839	186.996
1419	35.8951	-29.1765	-11.4013	66.2129	61.3388	-10.643	-32.2477	-123.847	-8.29895	176.15
1420	32.3524	-28.7764	-11.3983	63.0303	56.4923	-10.6407	-31.0564	-119.013	-8.28953	165.959
1421	28.9145	-28.3902	-11.3954	59.9895	51.9802	-10.6383	-29.9425	-114.403	-8.28012	156.38
1422	25.5749	-28.0174	-11.3925	57.0836	47.7777	-10.6359	-28.9009	-110.008	-8.27072	147.374
1423	22.3276	-27.6574	-11.3896	54.3057	43.8615	-10.6334	-27.9264	-105.816	-8.26134	138.902
1424	19.1668	-27.3099	-11.3867	51.6498	40.2106	-10.6309	-27.0146	-101.819	-8.25196	130.931
1425	16.0869	-26.9743	-11.3838	49.1097	36.8055	-10.6283	-26.1613	-98.0062	-8.24259	123.427
1426	13.0827	-26.6503	-11.3808	46.6798	33.6284	-10.6256	-25.3624	-94.3691	-8.23323	116.361
1427	10.1492	-26.3373	-11.3779	44.3549	30.6627	-10.6229	-24.6143	-90.8993	-8.22388	109.705
1428	7.28156	-26.0351	-11.375	42.1298	27.8933	-10.6201	-23.9137	-87.5886	-8.21453	103.432
1429	4.4751	-25.7432	-11.3721	39.9998	25.3063	-10.6173	-23.2573	-84.4293	-8.20519	97.5191
1430	1.72538	-25.4612	-11.3692	37.9603	-83.9717	-10.6144	-22.6423	-81.4142	-8.19585	91.9428
1431	-0.971939	-25.1887	-11.3663	36.007	-78.5812	-10.6114	-22.0658	-78.5362	-8.18652	86.6822
1432	-3.62106	-24.9256	-11.3634	34.1359	-73.6092	-10.6084	-21.5254	-75.7888	-8.17718	81.7177
1433	-6.2261	-24.6713	-11.3605	32.3431	-69.0218	-10.6053	-21.0187	-73.1656	-8.16785	77.0311
1434	-8.79107	-24.4256	-11.3576	30.6249	-64.7881	-10.6022	-20.5435	-70.6608	-8.15852	72.6053
1435	-11.3199	-24.1882	-11.3547	28.9779	-60.8796	-10.5991	-20.0977	-68.2685	-8.14919	68.4244
1436	-13.8166	-23.9587	-11.3518	27.3987	-57.2703	-10.5959	-19.6794	-65.9835	-8.13986	64.4734
1437	-16.2849	-23.737	-11.3488	25.8843	-53.9361	-10.5926	-19.2869	-63.8007	-8.13053	60.7386
1438	-18.7287	-23.5227	-11.3459	24.4316	-50.855	-10.5893	-18.9185	-61.7151	-8.12119	57.2069
1439	-21.152	-23.3156	-11.343	23.0379	-48.0068	-10.586	-18.5726	-59.7221	-8.11185	53.8662
1440	-23.5587	-23.1154	-11.34	21.7004	-45.3729	-10.5826	-18.2479	-57.8173	-8.10251	50.7052
1441	-25.9527	-22.9219	-11.3371	20.4167	-42.9364	-10.5792	-17.9429	-55.9966	-8.09317	47.7133
1442	-28.3382	-22.7349	-11.3341	19.1842	-40.6816	-10.5757	-17.6565	-54.2559	-8.08382	44.8806
1443	-30.7194	-22.554	-11.3312	18.0008	-38.5941	-10.5722	-17.3874	-52.5916	-8.07447	42.1977
1444	-33.1006	-22.3792	-11.3282	16.8641	-36.6608	-10.5687	-17.1346	-51	-8.06511	39.656
1445	-35.4864	-22.2102	-11.3252	15.7723	-34.8696	-10.5651	-16.8971	-49.4777	-8.05574	37.2474
1446	-37.8815	-22.0467	-11.3223	14.7231	-33.2093	-10.5615	-16.6738	-48.0215	-8.04637	34.9641
1447	-40.2911	-21.8887	-11.3193	13.7149	-31.6698	-10.5578	-16.464	-46.6284	-8.03699	32.7992
1448	-42.7205	-21.7359	-11.3163	12.7457	-30.2418	-10.5541	-16.2668	-45.2952	-8.02761	30.7457
1449	-45.1755	-21.5881	-11.3133	11.814	-28.9165	-10.5504	-16.0813	-44.0194	-8.01821	28.7976
1450	-47.6624	-21.4452	-11.3102	10.9179	-27.6861	-10.5466	-15.907	-42.7983	-8.00881	26.9487
1451	-50.1881	-21.307	-11.3072	10.0561	-26.5433	-10.9728	-15.7431	-41.6292	-7.9994	25.1937
1452	-52.7601	-21.1734	-11.3042	9.2271	-25.4814	-10.9587	-15.589	-40.5099	-29.7282	23.5273
1453	-55.3866	-21.0442	-11.3011	8.4294	-24.4942	-10.9452	-15.4441	-39.4381	-28.8783	21.9445
1454	-58.077	-20.9192	-11.2981	7.66171	-23.5761	-10.9321	-15.3078	-38.4116	-28.066	20.4409
1455	-60.8416	-20.7983	-11.295	6.92275	-22.7219	-10.9195	-15.1796	-37.4283	-27.2894	19.0121
1456	-63.6922	-20.6814	-11.2919	6.21131	-21.9268	-10.9073	-15.0591	-36.4863	-26.5469	17.654
1457	-66.6423	-20.5683	-11.2888	5.52623	-21.1863	-10.8955	-14.9458	-35.5837	-25.8369	16.3627
1458	-69.7074	-29.8592	-11.2857	4.86641	-109.204	-10.8841	-14.8392	-34.7187	-25.1577	15.1348
1459	-72.9055	-29.2241	-11.2826	4.2308	-101.19	-10.8731	-14.739	-33.8897	-24.508	13.9668
1460	-76.2579	-28.6181	-11.2795	3.61838	-93.8517	-10.8624	-14.6447	-33.095	-23.8863	12.8555
1461	-79.7895	-28.0398	-13.6919	3.02821	-87.1309	-10.8521	-14.5561	-32.3331	-23.2914	11.7979
1462	-83.5307	-27.4877	-13.591	2.45936	-80.9736	-10.8421	-14.4728	-31.6025	-22.7218	10.7912
1463	-87.5179	-26.9607	-13.4944	1.91095	-75.3307	-10.8324	-14.3945	-30.9019	-22.1766	9.83264
1464	-91.7964	-26.4575	-13.4019	1.38217	-70.1575	-10.8229	-14.3209	-30.23	-21.6545	8.91981
1465	-96.4224	-25.9771	-13.3132	0.872192	-65.4132	-10.8137	-14.2518	-29.5853	-21.1544	8.0503
1466	-101.468	-25.5182	-13.2283	0.380273	-61.0607	-10.8048	-14.1868	-28.9669	-20.6754	7.22186
1467	-107.026	-25.0799	-13.1468	-0.0943203	-57.0663	-10.7961	-14.1257	-28.3735	-20.2164	6.43239
1468	-113.221	-24.6612	-13.0687	-0.552284	-53.3991	-10.7877	-14.0684	-27.8039	-19.7766	5.67988
1469	-120.222	-24.2612	-12.9939	-0.994283	-50.031	-10.7794	-14.0146	-27.2573	-19.355	4.96246
1470	-103.204	-23.879	-12.9221	-1.42095	-46.9364	-10.7714	-13.9641	-26.7326	-18.9508	4.27833
1471	-120.954	-23.5137	-12.8532	-1.83291	-44.0922	-10.7635	-13.9168	-26.2288	-18.5633	3.62582
1472	-141.894	-23.1646	-12.7871	-2.23072	-41.4769	-10.7559	-13.8723	-25.745	-18.1916	3.00334
1473	-167.6	-22.8309	-12.7236	-2.61495	-39.0712	-10.7484	-13.8307	-25.2805	-17.8351	2.40938
1474	-200.967	-22.5118	-12.6627	-2.98614	-36.8575	-10.741	-13.7917	-24.8343	-17.493	1.84253
1475	466.852	-22.2068	-12.6042	-3.34478	-34.8197	-10.7339	-13.7551	-24.4056	-17.1648	1.30143
1476	462.899	-21.9151	-12.548	-3.69137	-32.9429	-10.7268	-13.721	-23.9938	-16.8497	0.784821
1477	458.978	-21.6362	-12.494	-4.02639	-31.2138	-10.72	-13.689	-23.5981	-16.5473	0.291494
1478	455.088	-21.3694	-12.4422	-4.35026	-29.6202	-10.7132	-13.6591	-23.2179	-16.2569	-0.17969
1479	451.231	-21.1143	-12.3923	-4.66342	-28.1507	-10.7066	-13.6312	-22.8524	-15.978	-0.629812
1480	428.885	-20.8702	-12.3444	-4.96629	-26.7953	-10.7	-13.6052	-22.5011	-15.7101	-1.05989
1481	407.79	-20.6366	-12.2983	-5.25925	-25.5445	-10.6936	-13.581	-22.1634	-15.4527	-1.4709
1482	387.867	-20.4132	-12.254	-5.54268	-24.3898	-10.6873	-13.5584	-21.8387	-15.2053	-1.86376
1483	369.039	-20.1994	-12.2113	-5.81695	-23.3234	-10.6811	-13.5374	-21.5264	-14.9676	-2.23933
1484	351.238	-19.9948	-12.1703	-6.08239	-22.3382	-10.675	-13.518	-21.2261	-14.7391	-2.59844
1485	334.398	-19.7989	-12.1308	-6.33935	-21.4275	-10.669	-13.4999	-20.9372	-14.5193	-2.94187
1486	318.457	-19.6115	-12.0927	-6.58813	-20.5854	-10.6631	-13.4832	-20.6594	-14.3079	-3.27037
1487	303.359	-19.4321	-12.0561	-6.82904	-19.8065	-10.6572	-13.4678	-20.392	-14.1046	-3.58463
1488	289.05	-19.2604	-12.0208	-7.06238	-19.0856	-10.6514	-13.4535	-20.1348	-13.909	-3.88534
1489	275.481	-19.0959	-11.9868	-7.28842	-18.4182	-10.6457	-13.4404	-19.8872	-13.7208	-4.17311
1490	262.604	-18.9385	-11.954	-7.50744	-17.8	-10.6401	-13.4284	-19.649	-13.5396	-4.44856
1491	250.377	-18.7878	-11.9224	-7.71969	-17.2273	-10.6345	-13.4175	-19.4197	-13.3651	-4.71225
1492	238.759	-18.6435	-11.8919	-7.92543	-16.6964	-10.629	-13.4075	-19.1989	-13.1971	-4.96473
1493	227.711	-18.5053	-11.8625	-8.12488	-16.204	-10.6235	-13.3984	-18.9863	-13.0353	-5.20652
1494	217.198	-18.3729	-11.8341	-8.31827	-15.7472	-10.6181	-13.3902	-18.7817	-12.8794	-5.43809
1495	207.187	-18.2462	-11.8067	-8.50584	-15.3233	-10.6128	-13.3828	-18.5845	-12.7292	-5.65993
1496	197.646	-18.1248	-11.7802	-8.68778	-14.9296	-10.6074	-13.3763	-18.3947	-12.5844	-5.87247
1497	188.547	-18.0085	-11.7547	-8.8643	-14.564	-10.6022	-13.3704	-18.2119	-12.4449	-6.07614
1498	179.863	-17.8972	-11.73	-9.03559	-14.2242	-10.5969	-13.3653	-18.0357	-12.3103	-6.27133
1499	171.568	-17.7905	-11.7061	-9.20184	-13.9083	-11.2183	-13.3609	-17.866	-12.1805	-6.45842
1500	163.639	-17.6884	-11.6831	-9.36323	-13.6144	-11.1887	-13.3571	-17.7025	-12.0553	-6.63779
1501	156.053	-17.5905	-11.6608	-9.51993	-13.341	-11.1606	-13.3539	-17.5449	-11.9344	-6.80977
1502	148.79	-17.4968	-11.6392	-9.67211	-13.0865	-11.1338	-13.3513	-17.393	-11.8178	-6.97469
1503	141.83	-17.407	-11.6183	-9.81993	-12.8495	-11.1083	-13.3492	-17.2466	-11.7052	-7.13287
1504	135.154	-17.321	-11.5981	-9.96353	-12.6286	-11.0841	-13.3476	-17.1055	-11.5965	-7.2846
1505	128.747	-17.2386	-11.5785	-10.1031	-12.4228	-11.061	-13.3466	-16.9695	-11.4916	-7.43017
1506	122.592	-17.1597	-11.5596	236.183	-12.2308	-11.039	-13.346	-16.8383	-11.3901	-7.56984
1507	116.673	-17.0842	-11.5412	225.105	-12.0517	-11.0181	-13.3458	-16.7118	-11.2921	-7.70388
1508	110.978	-17.0118	-11.5234	214.59	-11.8845	-10.9981	-13.3461	-16.5899	-24.6906	-7.83253
1509	105.493	-16.9425	-11.5061	204.605	-11.7284	-10.9789	-13.3468	-16.4722	-23.9494	-7.95602
1510	100.205	-16.8761	-11.4894	195.118	-11.5825	-10.9607	-13.3479	-16.3588	-23.2463	-8.07458
1511	95.1028	-16.8125	-11.4732	186.102	-11.4462	-10.9432	-13.3493	-16.2493	-22.5793	-8.18841
1512	90.1755	-16.7516	-11.4574	177.528	-11.3187	-10.9265	-13.3511	-16.1437	-21.9463	-8.29773
1513	85.4128	-16.6933	-11.4421	169.371	-11.1994	-10.9105	-13.3532	-16.0418	-21.3454	-8.40273
1514	80.8049	-16.6375	-11.4272	161.608	-11.0877	-10.8952	-13.3556	-15.9435	-20.7749	-8.50358
1515	76.3427	-16.584	-11.4127	154.216	-10.9831	-10.8805	-13.3583	-15.8486	-20.2331	-8.60047
1516	72.0174	-16.5329	-11.3987	147.174	-10.8852	-10.8663	-13.3613	-15.7571	-19.7185	-8.69356
1517	67.8209	-16.4839	-11.385	140.463	-10.7933	-10.8528	-13.3646	-15.6687	-19.2295	-8.78301
1518	63.7453	-16.437	-11.3717	134.064	-10.7071	-10.8397	-13.3681	-15.5834	-18.7649	-8.86899
1519	59.7833	-16.3922	-11.3588	127.96	-10.6263	-10.8272	-13.3719	-15.501	-18.3232	-8.95162
1520	55.9277	-16.3493	-11.3462	122.135	-10.5503	-10.8151	-13.3759	-15.4215	-17.9032	-9.03106
1521	52.172	-16.3082	-11.3339	116.574	-10.479	-10.8035	-13.3802	-15.3447	-17.5038	-9.10743
1522	48.5095	-16.2689	-11.3219	111.262	-10.412	-10.7923	-13.3846	-15.2706	-17.1239	-9.18087
1523	44.9343	-16.2314	-11.3103	106.186	-10.3489	-10.7814	-13.3892	-15.199	-16.7624	-9.25149
1524	41.4403	-16.1955	-11.2989	101.334	-10.2895	-10.771	-13.3941	-15.1299	-16.4183	-9.31941
1525	38.0219	-16.1612	-11.2878	96.6935	-10.2337	-10.7609	-13.3991	-15.0631	-16.0908	-9.38474
1526	34.6736	-16.1283	-11.277	92.2535	-10.181	-10.7511	-13.4043	-14.9986	-15.7789	-9.4476
1527	31.3899	-16.097	-11.2664	88.0037	-10.1314	-10.7416	-13.4096	-14.9363	-15.4819	-9.50807
1528	28.1656	-16.067	-11.2561	83.9344	-10.0846	-10.7324	-13.4151	-14.876	-15.1989	-9.56625
1529	24.9957	-16.0385	-11.246	80.0362	-10.0404	-10.7235	-13.4208	-14.8179	-14.9293	-9.62225
1530	21.8751	-16.0111	-11.2361	76.3005	-9.99862	-10.7148	-13.4266	-14.7617	-14.6723	-9.67615
1531	18.7988	-15.9851	-11.2265	72.7192	-9.95917	-10.7064	-13.4325	-14.7074	-14.4272	-9.72803
1532	15.7618	-15.9602	-11.217	69.2845	-9.92185	-10.6982	-13.4386	-14.6549	-14.1935	-9.77797
1533	12.7592	-15.9365	-11.2078	65.9893	-9.88654	-10.6903	-13.4448	-14.6041	-13.9706	-9.82606
1534	9.78604	-15.9139	-11.1987	62.8268	-9.8531	-10.6825	-13.4511	-14.5551	-13.7579	-9.87236
1535	6.8372	-15.8924	-11.1899	59.7904	-9.82141	-10.675	-13.4575	-14.5077	-13.5549	-9.91695
1536	3.90754	-15.8719	-11.1812	56.8741	-9.79135	-10.6676	-13.464	-14.4619	-13.3612	-9.9599
1537	0.991733	-15.8524	-11.1727	54.0723	-9.76282	-10.6604	-13.4706	-14.4176	-13.1761	-10.0013
1538	-1.91572	-15.8338	-11.1643	51.3794	-9.73573	-10.6533	-13.4773	-14.3748	-12.9994	-10.0411
1539	-4.82058	-15.8161	-11.1561	48.7905	-9.70998	-10.6464	-13.4841	-14.3334	-12.8305	-10.0795
1540	-7.72892	-15.7993	-11.1481	46.3007	-9.68549	-10.6397	-13.491	-14.2934	-12.6691	-10.1165
1541	-10.6472	-15.7834	-11.1401	43.9055	-9.66217	-10.633	-13.4979	-14.2546	-12.5148	-10.1522
1542	-13.5822	-15.7682	-11.1324	41.6005	-9.63996	-10.6265	-13.505	-14.2172	-12.3673	-10.1865
1543	-16.5416	-15.7539	-12.1955	39.3816	-9.61878	-10.6202	-13.5121	-14.181	-12.2261	-10.2197
1544	-19.5333	-15.7403	-12.1407	37.2452	-9.59857	-10.6139	-13.5193	-14.146	-12.0911	-10.2516
1545	-22.5665	-15.7274	-12.0883	35.1874	-9.57927	-10.6078	-13.5265	-14.1121	-11.9619	-10.2824
1546	-25.6509	-15.7152	-12.0384	33.2049	-9.56082	-10.6017	-13.5338	-14.0793	-11.8382	-10.3121
1547	-28.7979	-15.7037	-11.9907	31.2943	-9.54318	-10.5958	-13.5412	-14.0476	-11.7197	-10.3407
1548	-32.02	-15.6929	-11.9452	29.4526	-9.52628	-10.5899	-13.5486	-14.017	-11.6062	-10.3683
1549	-35.3316	-15.6826	-11.9017	27.6769	-9.51009	-10.5841	-13.5561	-13.9873	-11.4975	-10.3949
1550	-38.7495	-15.673	-11.8601	25.9643	-9.49457	-10.5784	-13.5636	-13.9586	-11.3932	-10.4206
1551	-42.2931	-15.6639	-11.8204	24.3123	236.62	-10.5728	-13.5712	-13.9308	-11.2933	-10.4454
1552	-45.9855	-15.6554	-11.7823	22.7182	219.535	-10.5672	-13.5788	-13.904	-11.1974	-10.4693
1553	-49.8541	-15.6475	-11.746	21.1798	203.734	-10.5617	-13.5865	-13.878	-11.1054	-10.4924
1554	-53.9323	-15.64	-11.7111	19.6947	189.112	-10.5563	-13.5942	-13.8528	-11.0172	-10.5147
1555	-58.261	-15.6331	-11.6778	18.2608	175.573	-10.5509	-13.6019	-13.8284	-19.6794	-10.5361
1556	-62.8915	-15.6266	-11.6459	16.876	163.029	-10.5456	-13.6097	-13.8049	-19.1202	-10.5569
1557	-67.8888	-15.6206	-11.6153	15.5385	151.4	-10.5403	-13.6175	-13.782	-18.5937	-10.5769
1558	-73.3374	-15.615	-11.586	14.2463	140.614	-10.5351	-13.6254	-39.5554	-18.0976	-10.5963
1559	-79.3499	-15.6099	-11.5579	12.9976	130.603	-10.5299	-13.6332	-38.0104	-17.6302	-10.6149
1560	-86.0802	-15.6052	-11.531	11.7909	121.306	-10.5247	-13.6411	-36.5582	-17.1896	-10.633
1561	-93.7463	-15.6008	-11.5051	10.6244	112.668	-10.5196	-13.649	-35.1928	-16.7742	-10.6504
1562	-102.671	-15.5969	-11.4803	9.49673	104.637	-10.5146	-13.657	-33.9088	-16.3824	-76.2152
1563	-113.355	-15.5933	-11.4564	8.40633	97.1675	-10.5095	-13.665	-32.7009	-16.0128	-73.4352
1564	-126.64	-15.5901	-11.4335	7.35183	90.2155	-10.5045	-13.6729	-31.5645	-15.664	-70.7838
1565	-144.068	-15.5873	-11.4115	6.33191	83.7421	-10.4996	-13.6809	-30.4949	-15.3347	-68.2548
1566	188.152	-15.5847	-11.3903	5.3453	77.7113	-10.4946	-13.689	-29.4881	-15.0238	-65.8422
1567	186.299	-15.5825	-11.37	4.39079	72.0901	-10.4897	-13.697	-28.5401	-14.7302	-63.5403
1568	184.461	-15.5806	-11.3504	3.46721	66.848	-10.4848	-13.705	-27.6474	-14.4527	-61.3436
1569	182.638	-15.579	-11.3315	2.57347	61.9573	-10.4799	-13.7131	-26.8063	-14.1904	-59.2472
1570	180.83	-15.5777	-11.3133	1.70849	57.3921	-10.475	-13.7212	-26.0139	-13.9425	-57.246
1571	175.137	-15.5766	-11.2958	0.871275	53.129	-10.4702	-13.7293	-25.2671	-13.708	-55.3355
1572	169.643	-15.5758	-11.2789	0.0608457	49.1461	-10.4653	-13.7374	-24.563	-13.4861	-53.5113
1573	433.084	-15.5753	-11.2627	-0.723725	45.4235	-10.4605	-13.7455	-23.8992	-13.2762	-51.7692
1574	412.495	-15.575	-11.9901	-1.48333	41.9427	-10.4557	-13.7536	-23.2732	-13.0775	-50.1053
1575	393.014	-15.575	-11.9328	-2.21881	38.6867	-10.4509	-13.7617	-22.6826	-12.8893	-48.5158
1576	374.573	-15.5752	-11.8786	-2.931	35.6396	-10.4461	-13.7698	-22.1253	-12.711	-46.9972
1577	357.107	-15.5756	-11.8275	-3.62067	32.7872	-10.4414	-13.7779	-21.5995	-12.5421	-45.5461
1578	340.555	-15.5762	-11.7793	-4.28858	30.1158	-10.4366	-13.7861	-21.103	-12.382	-44.1592
1579	324.859	-15.5771	-11.7336	-4.93545	27.6131	-10.4318	-13.7942	-20.6343	-12.2301	-42.8335
1580	309.967	-15.5781	-11.6904	-5.56197	25.2677	-10.4271	-13.8023	-20.1917	-12.0861	-41.5661
1581	295.828	-15.5794	-11.6496	-6.1688	23.0688	-10.4223	-13.8105	-19.7735	-11.9494	-40.3542
1582	282.396	-15.5808	-11.611	-6.75658	21.0067	-10.4176	-13.8186	-19.3785	-11.8197	-39.1952
1583	269.627	-15.5824	-11.5743	-7.32594	19.0723	-10.4128	-13.8267	-19.0051	-11.6965	-38.0867
1584	257.479	-15.5841	-11.5397	-7.87745	17.257	-10.4081	-13.8348	-18.6523	-11.5794	-37.0263
1585	245.915	-15.5861	-11.5068	-8.41169	15.553	-10.4034	-13.843	-18.3186	-11.4682	-36.0117
1586	234.898	-15.5882	-11.4757	-8.92919	13.9531	-10.3986	-13.8511	-18.0032	-11.3625	-35.0408
1587	224.394	-15.5904	-11.4461	-9.43049	12.4504	-10.3939	-13.8592	-17.7048	-11.2619	-34.1115
1588	214.373	-15.5928	-11.418	-9.91609	11.0388	-10.3891	-13.8673	-22.8157	-11.1662	-33.222
1589	204.804	-15.5954	-11.3914	-144.999	9.71221	-10.3844	-13.8754	-22.105	-11.0752	-32.3703
1590	195.66	-15.598	-11.3661	-139.958	8.46535	-10.3796	-13.8835	-21.4432	-10.9885	-31.5548
1591	186.915	-15.6009	-11.342	-135.105	7.29312	-10.3749	-13.8916	-20.8267	-10.9058	-30.7739
1592	178.545	-15.6038	-11.3191	-130.436	6.1908	-10.3701	-13.8997	-20.2522	-10.8271	-30.0258
1593	170.526	-15.6069	-11.2973	-125.946	5.15401	-10.3654	-13.9078	-19.7167	-10.7521	-29.3091
1594	162.837	-15.6101	-11.2766	-121.628	4.17865	-10.3606	-13.9158	-19.2174	-10.6805	-28.6225
1595	155.459	-15.6134	-11.2568	-117.478	3.26091	-10.3558	-13.9239	-18.7518	-10.6122	-27.9645
1596	148.373	-15.6168	-11.238	-113.489	2.39722	-10.351	-13.9319	-18.3173	-10.5469	-27.3338
1597	141.561	-15.6203	-11.22	-109.656	1.58427	-10.3462	-13.94	-17.9119	-10.4846	-26.7292
1598	135.006	-15.6239	-11.2028	-105.975	0.81895	-10.3415	-13.948	-17.5335	-10.4251	-26.1496
1599	128.692	-15.6277	-11.1864	-102.439	0.0983682	-10.3367	-13.956	-17.1802	-10.3682	-25.5938
1600	122.606	-15.6315	-11.1708	-99.0429	-0.580183	-10.3318	-13.964	-16.8502	-10.3138	-25.0607
1601	116.733	-15.6354	-11.1558	-95.7821	-1.21923	-10.327	-13.972	-16.5419	-10.2617	-24.5494
1602	111.061	-15.6394	-11.1415	-92.6512	-1.82115	-10.3222	-13.98	-16.2539	-10.2118	-24.0589
1603	105.577	-15.6435	-11.1277	-89.6453	-2.38814	-10.3174	-13.988	-15.9846	-10.164	-23.5883
1604	100.269	-15.6477	-11.1146	-196.744	-2.92229	-10.3125	-13.9959	-15.7328	-10.1182	-23.1366
1605	95.127	-15.6519	-11.102	-186.835	-3.42552	-10.3077	-14.0038	-15.4974	-10.0743	-22.7032
1606	90.1399	-15.6562	-11.0899	-177.474	-3.89966	-10.3028	-14.0118	-15.2771	-10.0321	-22.2871
1607	85.2982	-15.6606	-11.0782	-168.631	-4.3464	-10.2979	-14.0197	-15.071	-9.99169	-21.8876
1608	80.5924	-15.6651	-11.5957	-160.281	-4.76734	-10.2931	-14.0276	-14.8781	-9.95284	-21.504
1609	76.0136	-15.6696	-11.553	-152.396	-5.16398	-11.4921	-14.0354	-14.6976	-9.91549	-21.1356
1610	71.5532	-15.6742	-11.5129	-144.95	-5.53772	-11.4411	-14.0433	-14.5284	-9.87958	-20.7818
1611	67.2031	-15.6789	-11.4753	-137.921	-5.88987	-11.3925	-14.0511	-14.37	-9.84502	-20.4419
1612	62.9552	-15.6836	-11.4401	-131.284	-6.22167	-11.3463	-14.059	-14.2216	-9.81176	-20.1153
1613	58.8021	-15.6884	-11.407	-125.017	-6.53428	-11.3023	-14.0668	-14.0826	-9.77971	-19.8015
1614	54.7363	-15.6932	-11.3759	-119.1	-6.82878	-11.2605	-14.0746	-13.9522	-9.74882	-19.4999
1615	50.7507	-15.6981	-11.3467	-113.513	-7.1062	-11.2205	-14.0823	-13.83	-9.71902	-19.21
1616	46.8383	-15.703	-11.3193	-108.237	-7.3675	-11.1825	-14.0901	-13.7153	-9.69027	-18.9313
1617	42.9921	-15.708	-11.2934	-183.999	182.976	-11.1462	-14.0978	-13.6078	-9.6625	-18.6633
1618	39.2053	-15.7131	-11.2691	-172.463	170.064	-11.1115	-14.1056	-13.5069	-9.63567	-18.4057
1619	35.4711	-15.7181	-11.2462	-161.738	158.043	-11.0784	-14.1133	-13.4122	-9.60973	-18.1578
1620	31.7826	-15.7232	-11.2245	-151.767	146.843	-11.0468	-14.1209	-13.3233	-9.58463	-17.9195
1621	28.1331	-15.7284	-11.2042	-142.495	136.399	-11.0166	-14.1286	-13.2399	-9.56033	-17.6901
1622	24.5155	-15.7336	-11.1849	-133.872	126.652	-10.9878	-14.1362	-13.1615	-9.53678	-17.4695
1623	20.9226	-15.7388	-11.1667	-125.851	117.549	-10.9601	-14.1438	-13.0879	-9.51396	-17.2571
1624	17.347	-15.7441	-11.1495	-118.389	109.04	-10.9337	-14.1514	-13.0187	-9.49182	-17.0528
1625	13.7809	-15.7494	-11.1332	-111.445	101.08	-10.9083	-14.159	-12.9537	-9.47033	-16.8561
1626	10.2161	-15.7547	-11.1178	-104.982	93.6283	-10.8841	-14.1666	-12.8926	-9.44946	-16.6667
1627	6.64375	-15.7601	-11.1032	-98.9648	86.6473	-10.8608	-14.1741	-12.8351	-9.42917	-16.4844
1628	3.05456	-15.7655	-11.0893	-93.3618	80.1026	-10.8384	-14.1816	-12.7811	-9.40944	-16.3088
1629	-0.561763	-15.7709	-11.0761	-88.143	73.9625	-10.817	-14.1891	-12.7302	-9.39024	-16.1396
1630	-4.2165	-15.7764	-11.0636	-83.2808	68.1983	-10.7964	-14.1966	-12.6824	-9.37153	-15.9767
1631	-7.92217	-15.7818	-11.0517	-78.7499	62.7833	-10.7766	-14.204	-12.6374	-9.35331	-15.8198
1632	-11.6929	-15.7873	-11.0403	-74.5264	57.6931	-10.7575	-14.2115	-12.5951	-9.33553	-15.6686
1633	-15.5446	-15.7929	-11.0295	-70.5885	52.9053	-10.7392	-14.2189	-12.5552	-9.31819	-15.5229
1634	-19.4959	-15.7984	-11.0192	-66.9159	48.3993	-10.7216	-14.2262	-12.5177	-9.30125	-15.3825
1635	-23.568	-15.8039	-11.0094	-63.4898	44.156	-10.7045	-14.2336	-12.4823	-9.28471	-15.2471
1636	-27.7865	-15.8095	-11	-60.2929	40.1578	-10.6881	-14.2409	-12.4491	-9.26853	-15.1166
1637	-32.1816	-15.8151	-10.9909	-57.3089	36.3887	-10.6723	-14.2482	-12.4177	-9.2527	-14.9908
1638	-36.79	-15.8207	-10.9823	-54.523	32.8337	-10.657	-14.2555	-12.3881	-9.23721	-14.8695
1639	-41.6571	-15.8263	-10.974	-51.9214	29.4789	-10.6423	-14.2628	-12.3603	-9.22203	-14.7525
1640	-46.8399	-15.832	-10.9661	-49.491	26.3116	-10.628	-14.27	-12.334	-9.20715	-14.6396
1641	-52.411	-15.8376	-10.9584	-47.2202	23.3199	-10.6142	-14.2772	-12.3093	-9.19256	-14.5308
1642	-58.4659	-15.8433	-10.9511	-45.0978	20.4929	-10.6008	-14.2844	-12.2859	-9.17824	-14.4257
1643	-65.1327	-15.8489	-10.944	-43.1136	17.8205	-10.5878	-14.2915	-12.2639	-9.16418	-14.3244
1644	-72.589	-15.8546	-11.3877	-41.2581	15.2931	-10.5753	-14.2987	-12.2431	-9.15036	-14.2265
1645	-81.0904	-15.8603	-11.353	-39.5225	12.902	-10.5631	-14.3058	-12.2236	-9.13678	-14.1321
1646	-91.0225	-15.866	-11.3208	-37.8986	10.6391	-10.5513	-14.3129	-12.2051	-9.12342	-14.041
1647	-103.002	-15.8717	-11.2907	-36.3788	8.49681	-10.5398	-14.3199	-12.1876	-9.11027	-13.953
1648	-118.099	-15.8774	-11.2626	-34.9561	6.46802	-10.5286	-14.327	-12.1712	-9.09732	-13.868
1649	204.256	-15.8831	-11.2364	-33.6239	4.54617	-10.5177	-14.334	-12.1556	-9.08456	-13.786
1650	202.148	-15.8888	-11.2119	-32.3762	2.72512	-10.5071	-14.3409	-12.1409	-9.07198	-13.7068
1651	200.058	-15.8946	-11.1889	234.661	0.999152	-10.4968	-14.3479	-12.1271	-9.05957	-13.6302
1652	197.985	-15.9003	-11.1675	216.05	-0.637089	-10.4867	-14.3548	-12.114	-9.04732	-13.5563
1653	195.929	-15.906	-11.1474	198.953	-2.1886	-10.4769	-14.3617	-12.1016	-9.03523	-13.4848
1654	189.657	-15.9117	-11.1285	183.238	-3.66007	-10.4673	-14.3686	-12.0899	-9.02329	-13.4158
1655	183.607	-15.9174	-11.1109	168.784	-5.05586	-10.4579	-14.3754	-12.0789	-9.01149	-13.3491
1656	177.77	-15.9232	-11.0942	155.483	-6.38008	-10.4488	-14.3822	-12.0684	-8.99982	-13.2846
1657	172.137	-15.9289	-11.0786	143.235	-7.63656	-11.6862	-14.389	-12.0585	-8.98827	-13.2222
1658	166.699	-15.9346	-11.0639	131.952	-8.82892	-11.6187	-14.3958	-12.0492	-8.97685	-13.1619
1659	161.449	-15.9403	-11.05	121.551	-9.96054	-11.555	-14.4025	-12.0404	-8.96554	-13.1036
1660	156.379	-15.946	-11.037	111.959	-11.0346	-11.4948	-14.4092	-12.0321	-8.95433	-13.0472
1661	151.481	-15.9518	-11.0246	103.107	-12.054	-11.438	-14.4159	-12.0242	-8.94323	-12.9927
1662	146.748	-15.9575	-11.013	94.9342	-13.0217	-11.3843	-14.4225	-12.0167	-8.93222	-12.94
1663	142.173	-15.9632	-11.0019	87.3847	-13.9403	-11.3335	-14.4291	-12.0097	-8.92131	-12.8889
1664	137.75	-15.9689	-10.9915	80.4073	-14.8122	-11.2854	-14.4357	-12.003	-8.91048	-12.8395
1665	133.474	-15.9746	-10.9816	73.9553	-15.6398	-11.2399	-14.4423	-11.9966	-8.89974	-12.7918
1666	129.337	-15.9802	-10.9722	67.9862	-16.4252	-11.1969	-14.4488	-11.9907	-8.88907	-12.7455
1667	125.335	-15.9859	-10.9632	62.4612	-17.1707	-11.156	-14.4553	-11.985	-8.87848	-12.7007
1668	121.461	-15.9916	-10.9547	57.3448	-17.8781	-11.1174	-14.4618	-11.9796	-8.86795	-12.6574
1669	117.712	-15.9972	-10.9466	52.6046	-18.5493	-11.0807	-14.4682	-11.9746	-8.8575	-12.6154
1670	114.082	-16.0029	-10.9388	48.2108	-19.186	-11.0458	-14.4746	-11.9698	-8.8471	-12.5748
1671	110.566	-16.0085	-10.9314	44.1362	-19.7899	-11.0127	-14.481	-11.9652	-8.83677	-12.5354
1672	107.16	-16.0142	-10.9243	40.3561	-20.3626	-10.9813	-14.4874	-11.9609	-8.82649	-12.4972
1673	103.86	-16.0198	-10.9175	257.808	-20.9055	-10.9514	-14.4937	-11.9568	-8.81626	-12.4603
1674	100.661	-16.0254	-10.911	235.032	-21.4201	-10.923	-14.5	-11.9529	-8.80608	-12.4245
1675	97.5602	-16.031	-10.9047	214.296	-21.9076	-10.8959	-14.5062	-11.9492	-8.79595	-12.3898
1676	94.5534	-16.0366	-10.8987	403.65	-22.3694	-10.8702	-14.5125	-11.9458	-8.78586	-12.3562
1677	91.637	-16.0422	-10.8928	361.737	-22.8065	-10.8456	-14.5187	-11.9425	-8.77581	-39.7418
1678	88.8077	-16.0477	-10.8872	324.239	-23.2202	-10.8222	-14.5248	-11.9393	-8.7658	-38.5321
1679	86.0621	-16.0533	-10.8818	290.64	-23.6115	-11.9453	-14.531	-11.9364	-8.75583	-37.3782
1680	83.3973	-16.0588	-10.8766	260.491	-23.9814	-11.8535	-14.5371	-11.9335	-8.74589	-36.2774
1681	80.8102	-16.0643	-10.8715	233.399	-24.3309	-11.7679	-14.5431	-11.9309	-8.73599	-35.2271
1682	78.298	-16.0699	-10.8665	209.018	-24.6609	-11.688	-14.5492	-11.9283	-8.72611	-34.2247
1683	75.858	-16.0754	-10.8617	187.044	-24.9723	-11.6135	-14.5552	-11.9259	-8.71626	-33.268
1684	73.4875	-16.0808	-10.8571	167.214	-25.2658	-11.5438	-14.5612	-11.9236	-8.70644	-32.3546
1685	71.184	-16.0863	-10.8525	149.292	-25.5424	-11.4787	-14.5671	-11.9214	-8.69664	-31.4824
1686	68.9452	-16.0917	-10.8481	5.35136	-25.8027	-11.4179	281.924	-11.9194	-8.68687	-30.6495
1687	66.7687	-16.0972	-10.8437	2.25092	-26.0474	-11.3609	270.623	-11.9174	-8.67711	-29.8539
1688	64.6524	-16.1026	-10.8395	-0.506333	-26.2772	-11.3076	259.833	-11.9155	-8.66737	-29.0939
1689	62.5942	-16.108	-10.8354	-2.95909	-26.4928	-11.2577	249.526	-11.9137	-8.65765	-28.3676
1690	60.5921	-16.1134	-10.8313	-5.14141	-26.6948	-11.2109	239.678	-11.9121	-8.64795	-27.6736
1691	58.644	-16.1187	-10.8273	-7.08337	-26.8838	-11.167	230.265	-11.9104	-8.63826	-27.0102
1692	56.7482	-16.1241	-10.8234	-8.81151	-27.0603	-11.1258	221.266	-11.9089	-8.62859	-26.376
1693	54.9029	-16.1294	-10.8195	-10.3493	-27.2248	-11.0871	212.66	-11.9074	-8.61892	-25.7696
1694	53.1064	-16.1347	-10.8157	-11.7174	-27.3779	-11.0507	204.426	-11.906	-8.60927	-25.1896
1695	51.3571	-16.14	-10.812	-12.9344	-27.52	-11.0165	196.547	-11.9047	-8.59963	-24.6349
1696	49.6533	-16.1453	-10.8083	-14.0164	-27.6517	-10.9844	189.005	-11.9034	-8.59	-24.1043
1697	47.9937	-16.1506	-10.8046	-14.9779	-27.7732	-10.9541	181.782	-11.9022	-8.58037	-23.5965
1698	46.3766	-16.1558	-10.801	-15.8318	-27.8852	-10.9255	174.863	-11.901	-8.57075	-23.1106
1699	44.8008	-16.161	-10.7975	-16.5894	-27.988	-10.8986	168.233	-11.8999	-8.56113	-22.6455
1700	43.265	-16.1662	-10.7939	-17.261	-28.0819	-10.8732	161.879	-11.8988	-8.55152	-22.2002
1701	41.7678	-16.1714	-10.7904	-17.8555	-28.1673	-10.8492	155.785	-11.8978	-8.54192	-21.7739
1702	40.308	-16.1765	-10.787	-18.3809	-28.2446	-10.8265	149.941	-11.8968	-8.53232	-21.3656
1703	38.8845	-16.1817	-10.7835	-18.8446	-28.3141	-10.805	144.334	-11.8959	-8.52271	-20.9746
1704	37.496	-16.1868	-10.7801	-19.2528	-28.3762	-10.7847	138.952	-11.895	-8.51311	-20.6
1705	36.1416	-16.1919	-10.7767	-19.6112	-28.4311	-10.7654	133.785	-11.8941	-8.50351	-20.2411
1706	34.8201	-16.197	-11.2953	-19.9251	-28.4792	-10.7471	128.823	-11.8933	-8.49391	-19.8972
1707	33.5306	-16.202	-11.2618	-20.1988	-28.5206	-10.7297	124.055	-11.8924	-8.48431	-19.5675
1708	32.272	-16.207	-11.2306	-20.4366	-28.5558	-10.7132	119.474	-11.8917	-8.47471	-19.2515
1709	31.0435	-16.212	-11.2015	-20.642	-28.5849	-10.6974	115.069	-11.8909	-8.46511	-18.9486
1710	29.8442	-16.217	-11.1743	-20.8183	-28.6083	-10.6824	110.834	-11.8902	-8.4555	-18.6581
1711	28.6731	-16.222	-11.1488	-20.9686	-28.626	-10.6682	106.759	-11.8895	-8.44589	-18.3794
1712	27.5295	-16.2269	-11.1249	-21.0953	-28.6385	-11.6949	102.839	-11.8888	-8.43627	-18.1122
1713	26.4126	-16.2318	-11.1026	-21.2009	-28.6458	-11.6138	99.0654	-11.8881	-8.42665	-17.8557
1714	25.3215	-16.2367	-11.0816	-21.2874	-28.6482	-11.5386	95.432	-11.8874	-8.41703	-17.6097
1715	24.2555	-16.2416	-11.0619	-21.3568	-28.646	-11.469	91.9326	-11.8868	-8.4074	-33.7717
1716	23.2139	-16.2464	-11.0435	-21.4108	-28.6392	-11.4043	88.5612	-11.8862	-8.39776	-32.6053
1717	22.1961	-16.2512	-11.0261	-21.451	-28.6281	-11.3443	85.312	-11.8856	-8.38812	-31.5037
1718	21.2013	-16.256	-11.0097	-21.4786	-28.6128	-11.2886	82.1799	-12.3182	-8.37847	-30.4628
1719	20.2289	-16.2608	-10.9943	-21.495	-28.5936	-11.2368	79.1595	-12.2832	-8.36881	-29.4793
1720	19.2783	-16.2655	-10.9798	-21.5013	-28.5705	-11.1886	76.2462	-12.2503	-8.35915	-28.5497
1721	18.3489	-16.2703	-10.9661	-21.4985	-28.5438	-11.1438	73.4352	-12.2191	-8.34948	-27.6709
1722	17.44	-16.2749	-10.9531	-21.4875	-28.5136	-11.102	70.7223	-12.1898	-8.3398	-26.8398
1723	16.5513	-16.2796	-10.9408	-21.4692	-28.4801	-11.0631	68.1033	-12.1621	-8.33011	-26.0538
1724	15.682	-16.2843	-10.9292	-21.4442	-28.4433	-11.0268	65.5742	-12.1359	-8.32041	-25.3102
1725	14.8317	-16.2889	-10.9182	-21.4133	-28.4035	-10.9929	63.1312	-12.1112	-8.3107	-24.6065
1726	13.9998	-16.2935	-10.9077	-21.3771	-28.3606	-10.9612	60.7709	-12.0878	-8.30098	-23.9406
1727	13.186	-16.298	-10.8977	-21.336	-28.315	-10.9316	58.4898	-12.0657	-8.29126	-23.3101
1728	12.3896	-16.3026	-10.8883	-21.2907	-28.2667	-10.9039	56.2847	-12.0449	-8.28152	-22.7131
1729	11.6103	-16.3071	-10.8792	-21.2416	-28.2157	-10.8779	54.1524	-12.0251	-8.27177	-22.1477
1730	10.8477	-16.3116	-10.8706	-21.189	-28.1623	-10.8535	52.0901	-12.0065	-8.26201	-21.6121
1731	10.1012	-16.316	-10.8624	-21.1333	-28.1065	-10.8307	50.095	-11.9888	-8.25224	-21.1046
1732	9.37051	-16.3205	-10.8545	-21.0749	-28.0484	-10.8092	232.847	-11.9721	-8.24246	-20.6236
1733	8.6552	-16.3249	-10.8469	-21.0141	-27.9881	-10.789	221.189	-11.9563	-8.23267	-20.1677
1734	7.95487	-16.3292	-10.8397	-20.9511	-27.9258	-10.77	210.117	-11.9413	-8.22287	-19.7354
1735	7.26916	-16.3336	-10.8327	-20.8863	-27.8615	-10.7521	199.591	-11.9271	-8.21305	-19.3254
1736	6.59771	-16.3379	-10.826	-20.8197	-27.7952	-10.7351	189.576	-11.9137	-8.20323	-18.9365
1737	5.94016	-16.3422	-10.8195	-20.7517	-27.7272	-10.7192	180.037	-11.9009	-8.19339	-18.5675
1738	5.29617	-16.3465	-10.8133	-20.6824	-27.6574	-10.704	170.944	-11.8888	-8.18354	-18.2174
1739	4.6654	-16.3507	-10.8073	-20.612	-27.5859	-10.6897	162.266	-11.8774	-8.17367	-17.885
1740	4.04755	-16.3549	-10.8015	-20.5406	-27.5129	-10.6762	153.978	-11.8665	-8.1638	-17.5694
1741	3.4423	-16.3591	-10.7958	-20.4684	-27.4383	-10.6633	146.053	-11.8562	-8.15391	-17.2698
1742	2.84935	-16.3633	-11.3389	-20.3955	-27.3623	-10.651	138.469	-11.8464	-8.144	-16.9852
1743	2.26841	-4.75923	-11.2984	-20.3221	-27.2849	-10.6394	131.203	-11.8371	-8.13409	-16.7148
1744	1.69918	-5.04832	-11.2609	-20.2481	-27.2063	-10.6283	124.234	-11.8282	-8.12416	-16.4578
1745	1.14141	-5.32747	-11.2261	-20.1738	-27.1263	-10.6176	117.544	-11.8676	-8.11422	-16.2136
1746	-117.91	-5.59704	-11.1938	-20.0992	-27.0452	-10.6075	111.115	-11.8461	-8.10427	-15.9815
1747	-114.903	-5.85741	-11.1638	-20.0244	-26.963	-10.5978	104.929	-11.8261	-8.0943	-15.7608
1748	-111.99	-6.10892	-11.1358	-19.9494	-26.8797	-10.5885	98.9716	-11.8074	-8.08432	-15.5508
1749	-109.168	-6.35191	-11.1098	-19.8744	-26.7954	-10.5796	93.2274	-11.7899	-8.07432	-15.3511
1750	-106.434	-6.5867	-11.0856	-19.7993	-26.7101	-10.571	87.6827	-11.7736	-8.06431	-15.1611
1751	-103.787	-6.81359	-11.063	-137.579	-26.6239	-10.5627	82.3245	-11.7583	-8.05429	-14.9803
1752	-101.224	-7.03289	-11.0419	-126.921	-26.5368	-10.5548	77.1405	-11.744	-8.04425	-14.8081
1753	-98.7426	-7.24488	-11.0222	-117.208	-26.4489	-10.5471	72.1192	-11.7306	-8.0342	-14.6442
1754	-96.3406	-7.44982	-11.0038	-108.354	-26.3602	-10.5397	67.2497	-11.718	-8.02414	-14.4882
1755	-94.0156	-7.64799	-10.9865	-100.283	-26.2709	-10.5325	62.5216	-11.7062	-8.01406	-14.3395
1756	-91.7655	-7.83962	-10.9704	-92.9232	-26.1808	-10.5255	57.9249	-11.6952	-8.00396	-14.1979
1757	-89.588	-8.02497	-10.9552	-86.2107	-26.09	-10.5188	53.4504	-11.6848	-7.99386	-14.0629
1758	-87.4809	-8.20426	-10.9409	-80.0868	-25.9987	-10.5122	49.0891	-11.6751	-7.98374	-13.9343
1759	-85.4421	-8.37771	-10.9275	-74.498	-25.9068	-10.5058	-124.458	-11.666	-7.9736	-13.8116
1760	-83.4694	-8.54554	-10.9149	-69.3961	-25.8144	-10.4995	-121.189	-11.6575	-7.96345	-13.6947
1761	-81.5607	-8.70796	-10.903	-64.7369	-25.7214	-10.4935	-118.017	-11.6494	-7.95329	-13.5831
1762	-79.7142	-8.86515	-10.8917	-60.4804	-25.628	-10.4875	-114.942	-11.6418	-7.94311	-13.4767
1763	-77.9278	-9.01731	-10.8811	-56.5904	-25.5342	-10.4817	-111.961	-11.6347	-7.93292	-13.3752
1764	-76.1995	-9.16462	-10.871	-53.0338	-25.44	-10.476	-109.072	-11.628	-7.92271	-13.2783
1765	-74.5275	-9.30725	-10.8615	-49.7808	-25.3454	-10.4704	-106.273	-11.6217	-7.91249	-13.1858
1766	-72.9101	-9.44537	-10.8524	-46.8041	-25.2504	-10.4649	-103.563	-11.6158	-7.90225	-13.0974
1767	-71.3454	-9.57914	-10.8438	-44.0791	-25.1552	-10.4595	-100.938	-11.6102	-7.892	-13.0131
1768	-69.8316	-9.70872	-10.8356	-41.5835	-25.0597	-10.4542	-98.3974	-11.6049	-7.88173	-12.9325
1769	-68.3672	-9.83425	-10.8277	-39.2969	-24.9639	-10.449	-95.9384	-11.5999	-7.87145	-12.8555
1770	-66.9505	-9.95588	-10.8203	-37.2008	-24.8678	-10.4439	-93.5589	-11.5952	-7.86116	-12.7818
1771	-65.58	-10.0737	-10.8131	-35.2785	-24.7716	-10.4388	-91.2567	-11.5907	-7.85085	-12.7115
1772	-64.2541	-10.188	-10.8063	-33.5147	-24.6752	-10.4338	-89.0295	-11.5865	-7.84053	-12.6442
1773	-62.9713	-10.2987	-10.7997	-31.8957	-24.5786	-10.4288	-86.8753	-11.5825	-7.83019	-12.5799
1774	-61.7302	-10.406	-10.7934	-30.4087	-24.4819	-10.4239	-84.7918	-11.5787	-7.81984	-12.5183
1775	-60.5295	-10.5101	-10.7873	-29.0424	-24.3851	-10.4191	-82.7769	-11.5751	-7.80947	-12.4594
1776	-59.3677	-10.611	-10.7814	-27.7864	-24.2881	-10.4143	-80.8284	-11.5717	-7.79909	-12.403
1777	-58.2436	-10.7089	-10.7758	-26.6311	-24.1911	-10.4095	-78.9443	-11.5685	-7.78869	-12.349
1778	-57.156	-10.8038	-10.7703	-25.568	-24.0941	-10.4048	-77.1225	-11.5654	-7.77828	-12.2974
1779	-56.1035	-10.8959	-10.765	-24.5893	-23.997	-10.4001	-75.361	-11.5625	-7.76786	-12.2479
1780	-55.0851	-10.9853	-10.7598	-23.6877	-23.8999	-10.3954	-73.6577	-11.5597	-7.75742	-12.2004
1781	-54.0996	-11.072	-10.7548	-22.8568	-23.8027	-10.3908	-72.0108	-11.5571	-7.74696	-12.155
1782	-53.1459	-11.1562	-10.75	-113.025	-23.7056	-10.3862	-70.4184	-11.5545	-7.7365	-12.1114
1783	-52.223	-11.2378	-10.7452	-103.891	-23.6085	-10.3816	-68.8786	-11.5521	-7.72601	-12.0696
1784	-51.3298	-11.3171	-10.7406	-95.6142	-23.5115	-10.377	-67.3897	-11.5498	-7.71552	-12.0296
1785	-50.4652	-11.3941	-10.7361	-88.1103	-23.4145	-10.3724	-65.9498	-11.5476	-7.705	-11.9911
1786	-49.6285	-11.4689	-10.7316	-81.3049	-23.3176	-10.3679	-64.5573	-11.5454	-7.69448	-11.9542
1787	-48.8186	-11.5415	-10.7273	-75.1307	-23.2208	-10.3634	-63.2105	-11.5434	-7.68394	-11.9188
1788	-48.0347	-11.612	-10.7231	-69.5269	-23.1241	-10.3589	-61.9079	-11.5414	-7.67338	-11.8848
1789	-47.2759	-11.6805	-10.7189	-64.4388	-23.0275	-10.3544	-60.6478	-11.5395	-7.66281	-11.8522
1790	-46.5413	-11.747	-10.7148	-59.8171	-22.931	-10.3499	-59.4288	-11.5377	-7.65223	-11.8208
1791	-45.8301	-11.8117	-10.7108	-55.6172	-22.8347	-10.3454	-58.2494	-11.536	-7.64163	-11.7907
1792	-45.1417	-11.8745	-10.7068	-51.799	-22.7385	-10.3409	-57.1082	-11.5343	-7.63102	-11.7617
1793	-44.4752	-11.9356	-10.7029	-48.3264	-22.6425	-10.3365	-56.0038	-11.5326	-7.6204	-11.7338
1794	-43.8299	-11.995	-10.699	-45.1666	-152.1	-10.332	-54.9349	-11.531	-7.60976	-11.707
1795	-43.2051	-12.0527	-10.6952	-42.2903	-146.786	-10.3275	-53.9003	-11.5295	-7.5991	-11.6812
1796	-42.6001	-12.1088	-10.6914	-39.6708	-141.666	-10.3231	-52.8986	-11.528	-7.58844	-11.6564
1797	-42.0143	-12.1634	-10.6876	-37.2841	-136.734	-10.3186	-51.9288	-11.5266	-7.57775	-11.6325
1798	-41.447	-12.2165	-10.6839	-35.1087	-131.986	-10.3142	-50.9896	-11.5252	-7.56706	-11.6095
1799	-40.8977	-12.2682	-10.6802	-33.1249	-127.415	-10.3097	-50.08	-11.5238	-7.55635	-11.5874
1800	-40.3658	-12.3184	-10.6766	-31.315	-123.017	-10.3052	-49.1989	-11.5224	-7.54563	-11.566
1801	-39.8507	-12.3673	-10.6729	-29.663	-118.786	-10.3008	-48.3453	-11.5211	-7.53489	-11.5454
1802	-39.3518	-12.4149	-10.6693	-28.1546	-114.715	-10.2963	-47.5181	-11.5198	-7.52414	-11.5255
1803	-38.8686	-12.4612	-10.6657	-26.7766	-110.8	300.06	-46.7164	-11.5186	-7.51337	-11.5064
1804	-38.4006	-12.5062	-10.6622	-25.5172	-107.036	279.282	-45.9394	-11.5173	-7.5026	-11.4879
1805	-37.9473	-12.5501	-10.6586	-24.3656	-103.416	260.014	-182.905	-11.5161	-7.4918	-11.47
1806	-37.5083	-12.5928	-10.6551	-23.3122	-99.9366	242.139	-174.047	-11.5149	-7.481	-18.0214
1807	-37.0831	-12.6345	-10.6516	-22.3482	-96.5913	225.548	-165.641	-11.5138	-7.47018	-17.6658
1808	-36.6712	-12.675	-10.648	-21.4656	-93.3755	210.143	-157.669	-11.5126	-7.45935	-17.3296
1809	-36.2722	-12.7144	-10.6445	-20.6572	-90.2843	195.832	-150.113	-11.5115	-7.4485	-17.0117
1810	-35.8857	-12.7529	-10.641	-19.9164	-87.313	182.533	-142.953	-11.5103	-7.43764	-16.7109
1811	-35.5113	-12.7904	-10.6375	-19.2373	-84.4571	170.167	-136.17	-11.5092	-7.42677	-16.4263
1812	-35.1487	-12.8269	-10.634	-18.6145	-81.7119	158.665	-129.747	-11.5081	-7.41589	-16.157
1813	-34.7973	-12.8625	-10.6306	-18.043	-79.0733	147.962	-123.666	-11.507	-7.40499	-15.9021
1814	-34.457	-12.8971	-10.6271	-17.5185	-76.537	137.997	-117.909	-11.5059	-7.39408	-15.6607
1815	-34.1273	-12.931	-10.6236	-17.0369	-74.099	128.716	-112.461	-11.5048	-7.38315	-15.432
1816	-33.8079	-12.9639	-10.6201	-16.5944	-71.7554	120.069	-107.305	-11.5038	-7.37221	-15.2155
1817	-33.4984	-12.9961	-10.6166	-16.1877	-69.5025	112.008	-102.425	-11.5027	-7.36126	-15.0102
1818	-33.1987	-13.0274	-10.6131	-15.8139	-67.3365	104.492	-97.8074	-11.5016	-7.3503	-14.8157
1819	-32.9083	-13.058	-10.6097	-15.47	-65.2541	97.4791	-93.4379	-11.5006	-7.33932	-14.6313
1820	-32.6269	-13.0878	-10.6062	-15.1536	-63.252	90.9343	-89.3029	-11.4995	-7.32834	-19.687
1821	-32.3543	-13.1169	-10.6027	-14.8624	-61.3267	84.8236	-85.3898	-11.4985	-7.31733	-19.1403
1822	-32.0903	-13.1453	-10.5992	-14.5942	-59.4754	79.1161	-81.6866	-11.4974	-7.30632	-18.6303
1823	-31.8345	-13.173	-10.5957	-14.3472	-57.6949	73.7829	-78.1816	-11.0606	-7.29529	-18.1542
1824	-31.5867	-13.2001	-10.5922	-14.1195	-55.9825	68.7976	-74.864	-11.0803	-7.28426	-17.7098
1825	-31.3466	-13.2265	-10.5887	-13.9097	-54.3353	64.1358	-71.7235	-11.0987	-7.2732	-17.2948
1826	-31.114	-13.2523	-10.5851	-13.7161	-52.7508	59.7748	-68.7503	-11.1158	-17.0783	-16.9071
1827	-30.8888	-13.2775	-10.5816	-13.5376	-51.2265	55.6936	-65.9352	-11.1319	-16.7766	-16.5448
1828	-30.6705	-13.302	-10.5781	-13.3729	-49.7598	51.873	-63.2693	-11.1468	-16.4863	-16.2062
1829	-30.4591	-13.3261	-10.5745	-13.2208	-48.3484	48.295	-60.7445	-11.1608	-16.2071	-15.8895
1830	-30.2544	-13.3495	-10.571	-13.0804	-46.9902	44.943	-58.3528	-11.1738	-15.9383	-15.5934
1831	-30.056	-13.3724	-11.399	-12.9507	-45.683	41.8016	-56.087	-11.186	-15.6796	-15.3164
1832	-29.8639	-13.3948	-11.3495	-12.8308	-44.4247	38.8566	-53.9401	-11.1973	-15.4306	-15.0571
1833	-29.6779	-13.4167	-11.3032	-12.72	-43.2134	36.0947	-51.9054	-11.2079	-15.1908	-14.8143
1834	-29.4977	-13.4381	-11.2599	-12.6176	-42.0472	33.5037	-49.9769	-11.2178	-14.9599	-14.587
1835	-29.3231	-13.459	-11.2194	-12.5229	-40.9242	31.0722	-48.1485	-11.227	-14.7374	-14.3741
1836	-29.1541	-13.4794	-11.1815	-12.4353	-39.8428	28.7896	-46.4149	-11.2356	-14.5231	-17.8373
1837	-28.9905	-13.4994	-11.1459	-12.3543	-38.8012	26.6462	-44.7707	-11.2436	-14.3166	-17.3325
1838	-28.832	-13.5189	-11.1126	-12.2793	-37.7979	24.6327	-43.2112	-11.251	-14.1176	-16.867
1839	-28.6786	-13.538	-11.0813	-12.2099	-36.8314	22.7407	-41.7315	-11.258	-13.9257	-16.4377
1840	-28.53	-13.5567	-11.0519	-12.1457	-35.9002	20.9624	-40.3275	-11.2645	-13.7407	-16.0416
1841	-28.3862	-13.5749	-11.0243	-12.0862	-35.0028	19.2903	-38.9949	-11.2705	-13.5623	-15.676
1842	-28.247	-13.5928	-10.9984	-12.0311	-34.138	17.7177	-37.7298	-11.2761	-13.3901	-15.3384
1843	-28.1122	-13.6103	-10.9739	-11.9801	-33.3045	16.2382	-36.5287	-11.2813	-13.2241	-15.0265
1844	-27.9818	-13.6274	-10.9509	-11.9328	-32.501	14.8459	-35.388	-11.2862	-13.0639	-14.7383
1845	-27.8556	-13.6442	-10.9291	-11.889	-104.432	13.5352	-34.3044	-11.2907	-12.9092	-14.4719
1846	-27.7335	-13.6606	-10.9086	-11.8485	-99.8848	12.3011	-33.275	-11.2949	-12.7599	-14.2255
1847	-27.6153	-13.6766	-10.8893	-11.8109	-95.5699	11.1387	-32.2967	-11.2987	-12.6157	-13.9976
1848	-27.5009	-13.6923	-10.871	-11.7761	-91.475	10.0436	-31.3669	-11.3023	-12.4765	-13.7866
1849	-27.3903	-13.7077	-10.8536	-11.7439	-87.5885	9.01152	-30.483	-11.3057	-12.342	-13.5913
1850	-27.2833	-13.7228	-10.8372	-11.7141	-83.8993	8.03864	-29.6425	-11.3087	-12.212	-13.4104
1851	-27.1799	-13.7375	-10.8217	-11.6865	-80.3967	7.12131	-28.8431	-11.3116	-12.0865	-13.2428
1852	-27.0798	-13.752	-10.8069	-11.6609	-77.0709	6.25613	-28.0827	-11.3142	-11.9651	-13.0874
1853	-26.9831	-13.7661	-10.7928	-11.6372	-73.9124	5.43992	-27.3592	-11.3166	-11.8477	-12.9434
1854	-26.8896	-13.78	-10.7795	-11.6153	-70.9124	4.66972	-26.6706	-11.3188	-11.7342	-12.8097
1855	-26.7992	-13.7936	-10.7668	-11.5951	-68.0624	3.94275	-26.0152	-11.3208	-11.6244	-12.6857
1856	-26.7119	-13.8069	-10.7546	-11.5763	-65.3545	3.25641	-25.3912	-11.3226	-11.5181	-12.5706
1857	-26.6275	-13.82	-10.743	-11.559	-120.304	2.60828	-24.797	-11.3243	-11.4153	-12.4636
1858	-26.546	-13.8328	-10.732	-11.5431	-113.57	1.99608	-24.2311	-11.3258	-11.3158	-12.3643
1859	-26.4673	-13.8453	-10.7214	-11.5283	-107.271	1.41768	-23.6919	-11.3271	-11.2195	-12.2719
1860	-26.3912	-13.8576	-10.7113	-11.5147	-101.377	0.871095	-23.1781	-11.3283	-11.1262	-12.186
1861	-26.3178	-13.8696	-10.7016	-11.5022	156.039	0.354453	-103.237	-11.3294	-11.0359	-12.1061
1862	-26.247	-13.8814	-10.6922	-11.4907	143.209	-0.133994	-97.8564	-11.3304	-10.9483	-12.0317
1863	-26.1787	-13.893	-10.6833	-11.4801	131.442	-0.595888	-92.8098	-11.3312	-10.8635	-11.9625
1864	-26.1127	-13.9044	-10.6746	-11.4704	120.644	-1.03277	-88.0757	-11.332	-10.7812	-11.898
1865	-26.0491	-13.9155	-10.6663	-11.4615	110.729	-1.44607	-83.634	-11.3326	-10.7015	-11.8378
1866	-25.9878	-13.9265	-10.6583	-11.4533	101.622	-1.83715	-79.4659	-11.3331	-10.6242	-11.7818
1867	-25.9287	-13.9372	-10.6505	-11.4459	93.2505	-2.20729	-75.5537	-11.3336	-10.5492	-11.7295
1868	-25.8717	-13.9477	-10.643	-11.4391	85.5522	-2.55766	-71.8809	-11.3339	-10.4764	-11.6807
1869	-25.8169	-13.958	-10.6358	-11.433	78.4691	-2.8894	-68.4322	-11.3342	-10.4058	-11.6351
1870	-25.764	-13.9682	-10.6287	-11.4274	71.9486	-3.20355	-65.1933	-11.3343	-10.3372	-11.5925
1871	-25.7132	-13.9781	-10.6219	-11.4224	65.9431	-3.50111	-62.1506	-11.3344	-10.2707	-11.5527
1872	-25.6642	-13.9879	-10.6152	-11.4179	60.4091	-3.78299	-59.2916	-11.3345	-10.206	-11.5155
1873	-25.6172	-13.9975	-10.6088	-11.4138	55.3072	-4.05008	-56.6047	-11.3344	-10.1432	-11.4806
1874	-25.5719	-14.0069	-10.6025	-11.4102	50.6014	-4.30319	-54.0789	-11.3343	-10.0821	-11.448
1875	-25.5284	-14.0161	-10.5963	-11.4071	46.2589	-4.5431	-51.704	-11.3341	-10.0228	-11.4175
1876	-25.4867	-14.0252	-10.5903	-11.4043	42.2498	-4.77053	-49.4705	-11.3339	-9.96511	-11.3888
1877	-25.4466	-14.0341	-10.5845	-11.4019	38.5469	-4.98616	190.381	-11.3336	-9.90901	-13.3707
1878	-25.4081	-14.0428	-10.5787	-11.3999	35.1253	-5.19065	175.797	-11.3332	-9.85442	-13.1868
1879	-25.3712	-14.0514	-10.5731	-11.3982	31.9621	-5.38459	162.348	-11.3328	-9.80131	-13.0178
1880	-25.3358	-14.0598	-10.5676	-11.3968	29.0368	-5.56855	149.94	-11.3324	-9.74962	-12.8623
1881	-25.302	-14.0681	-10.5622	-11.3957	26.3301	-5.74308	138.483	-11.3319	-9.69928	-12.7192
1882	-25.2695	-14.0762	-10.5568	-11.3948	23.8248	-5.90868	127.9	-11.3313	-9.65027	-12.5874
1883	-25.2385	-14.0842	-10.5516	-11.3942	21.505	-6.06583	118.117	-11.3307	-9.60252	-12.4661
1884	-25.2089	-14.0921	-10.5465	-11.3939	19.356	-6.21497	109.069	-11.3301	-9.55599	-12.3543
1885	-25.1806	-14.0998	-10.5414	-11.3938	17.3646	-6.35654	100.696	-11.3294	-9.51064	-12.2512
1886	-25.1536	-14.1074	-10.5364	-11.3939	15.5183	-6.49093	92.9435	-11.3287	-9.46642	-12.1561
1887	-25.1278	-14.1148	-10.5314	-11.3942	13.8061	-6.61851	85.7612	-11.3279	-9.4233	-12.0684
1888	-25.1033	-14.1221	-10.5266	-11.3948	12.2177	-6.73965	79.1037	-11.3271	-9.38124	-11.9874
1889	-25.08	-14.1293	-10.5217	-11.3955	10.7434	-6.85469	72.9295	-11.3263	-9.34019	-11.9126
1890	-25.0578	-14.1364	-10.517	-11.3963	9.37473	-6.96393	67.2005	-11.3255	-9.30012	-11.8434
1891	-25.0368	-14.1433	-10.5122	-11.3974	8.10358	-7.06768	61.8821	-11.3246	-9.26099	-11.7795
1892	-25.0169	-14.1501	-10.5075	-11.3986	6.92263	-7.16623	56.9422	-11.3236	-9.22279	-11.7204
1893	-24.998	-14.1568	-10.5029	-11.3999	5.82511	-7.25983	52.3519	-11.3227	-9.18546	-11.6656
1894	-24.9802	-14.1634	-10.4983	-11.4014	4.80481	-7.34874	48.0843	-11.3217	-9.14898	-11.6149
1895	-24.9633	-14.1699	-10.4937	-11.403	-73.5579	-7.43321	44.115	-11.3207	-9.11331	298.564
1896	-24.9475	-14.1763	-10.4892	-11.4048	-68.4939	-7.51346	40.4214	-11.3196	-9.07844	270.997
1897	-24.9326	-14.1826	-10.4846	-11.4066	-63.8515	-7.58969	36.983	-11.3186	-9.04434	246.035
1898	-24.9187	-14.1887	-10.4802	-11.4086	-59.594	-7.66212	33.7808	-11.3175	-9.01097	223.418
1899	-24.9056	-14.1948	-10.4757	-11.4107	-55.6881	-7.73093	30.7972	-11.3163	-8.97831	202.915
1900	-24.8935	-14.2007	-10.4712	-11.4129	-52.1033	-7.79631	28.0163	-11.3152	-8.94633	184.316
1901	-24.8821	-14.2066	-10.4668	-11.4152	-48.8121	-7.85842	25.4233	-11.314	-8.91502	167.437
1902	-24.8717	-14.2123	-10.4624	-11.4176	-45.7892	-7.91743	23.0046	-11.3128	-8.88435	152.108
1903	-24.862	-14.218	-10.458	-11.4201	-43.0117	-7.97349	20.7475	-10.8035	-8.85429	138.181
1904	-24.8531	-14.2236	-10.4536	-11.4226	-40.4587	-8.02675	18.6407	-10.8292	-8.82483	125.52
1905	-24.845	-14.229	-10.4492	-11.4253	-38.111	-8.07734	16.6733	-10.8533	-8.79594	114.003
1906	-24.8376	-14.2344	-10.4449	-11.428	-35.9514	-8.12539	14.8355	-10.8758	-8.76761	103.522
1907	-24.831	-14.2397	-10.4405	-11.4308	-33.9639	-8.17104	13.1182	-10.8969	-8.73982	93.9784
1908	-24.825	-14.2449	-10.4362	-11.4336	-32.1341	-8.21438	11.5131	-10.9165	-8.71255	85.2838
1909	-24.8198	-14.25	-10.4318	-11.4366	-30.4489	-8.25555	10.0122	-10.9349	-8.68577	77.3585
1910	-24.8152	-14.2551	-10.4275	-11.4396	-28.8962	-8.29463	8.60847	-10.952	-8.65948	70.1307
1911	-24.8112	-14.26	-10.4232	-11.4426	-27.4649	-8.33174	7.29519	-10.9681	-8.63366	63.5358
1912	-24.8079	-14.2649	-10.4189	-11.4458	-26.1451	-8.36696	6.06618	-10.983	-8.60829	57.5152
1913	-24.8052	-14.2697	-10.4145	-11.4489	-24.9276	-8.40038	4.91573	-10.997	-16.1433	52.0163
1914	-24.8031	-14.2744	-10.4102	-11.4522	-23.8041	-8.4321	3.83854	-11.0101	-15.8459	46.9914
1915	-24.8016	-14.279	-10.4059	-11.4554	-22.7667	-8.46219	2.82969	-11.0223	-15.5614	42.3973
1916	-24.8006	-14.2835	-10.4015	-11.4588	-21.8086	-8.49072	1.8846	-11.0336	-15.2894	38.1951
1917	-24.8002	-14.288	-10.3972	-11.4622	-20.9233	-8.51777	0.999056	-11.0443	-15.0291	34.3497
1918	-24.8003	-14.2924	-10.3929	-11.4656	-20.105	-8.54342	0.169109	-11.0541	-14.78	30.8289
1919	-24.8009	-14.2967	-10.3885	-11.4691	-19.3483	-8.56772	-0.608895	-11.0634	-14.5416	27.604
1920	-24.802	-14.301	-10.3842	-11.4726	-18.6482	-8.59074	-1.33835	-11.072	-14.3134	24.6487
1921	-24.8037	-14.3052	-10.3798	-11.4761	-18.0003	-8.61253	-2.02243	-11.08	-14.0948	21.9392
1922	-41.9688	-14.3093	-10.3755	-11.4797	-17.4004	-8.63316	-2.66406	-11.0874	-13.8854	19.454
1923	-41.2039	-14.3133	-10.3711	-11.4833	-16.8447	-8.65268	-3.26599	-11.0944	-13.6848	17.1735
1924	-40.4675	-14.3173	-10.3668	-11.487	-16.3298	-8.67113	-3.83076	-11.1008	-13.4926	15.0799
1925	-39.7586	-14.3212	-10.3624	-11.4907	-15.8525	-8.68857	-4.36074	-11.1068	-13.3084	13.1571
1926	-39.0759	-14.325	-10.358	-11.4944	-15.4098	-8.70504	-4.85815	-11.1124	-13.1317	11.3903
1927	-38.4186	-14.3288	-10.3536	-11.4982	-14.9991	-8.72059	-5.32506	-11.1175	-12.9623	9.76619
1928	-37.7856	-14.3325	-10.3492	-11.502	-14.6179	-8.73526	191.168	-11.1223	-12.7998	8.27264
1929	-37.1759	-14.3362	-10.3448	-11.5058	-14.2639	-8.74909	176.388	-11.1267	-12.6438	6.89857
1930	-36.5886	-14.3398	-10.3404	-11.5097	-13.9351	-8.76211	162.731	-11.1308	-12.4942	5.63388
1931	-36.0229	-14.3433	-10.336	-11.5136	-13.6295	-8.77436	150.101	-11.1345	-12.3505	4.4694
1932	-35.4779	-14.3467	-10.3315	-11.5175	-13.3454	-8.78588	138.41	-11.138	-12.2126	3.39673
1933	-34.9527	-14.3502	-10.3271	-59.7763	-13.0811	-8.79669	127.58	-11.1412	-12.0801	2.40824
1934	-34.4468	-14.3535	-10.3226	-56.9443	-12.8351	-8.80683	117.539	-11.1441	-11.9527	1.49696
1935	-33.9592	-14.3568	-10.3182	-54.2902	-12.6062	-8.81634	108.223	-11.1467	-11.8304	0.656527
1936	-33.4894	-14.36	-10.3137	-51.8023	-12.393	-8.82522	99.572	-11.1491	-11.7128	-0.118881
1937	-33.0365	-14.3632	-10.3092	-94.4686	-12.1943	-69.5129	91.5333	-11.1513	-11.5997	-0.834573
1938	-32.6	-14.3663	-10.3047	-88.4239	-12.0091	-66.5183	84.058	-11.1533	-11.491	-1.4954
1939	-32.1793	-14.3693	-10.3002	-82.844	-11.8363	-63.6846	77.1016	-11.1551	-11.3863	-2.10582
1940	-31.7737	-14.3723	-10.2957	-77.6917	-11.6752	-61.0025	70.6237	-11.1567	-11.2856	-2.66987
1941	-31.3827	-14.3753	-10.2911	-72.9325	-11.5247	-58.4635	64.5874	-11.1581	-11.1887	-3.19128
1942	-31.0057	-14.3782	-10.2866	-68.5352	-11.3842	-56.0595	58.9591	-11.1593	-11.0954	-3.67346
1943	-30.6422	-14.381	-10.282	-102.361	-11.253	-53.7828	53.708	-11.1604	-11.0055	-55.4051
1944	-30.2917	-14.3838	-10.2774	-94.5343	-11.1303	-51.6263	48.8059	-11.1614	-10.9189	-51.5705
1945	-29.9537	-14.3865	-10.2728	-87.4133	-11.0155	-49.5831	44.2271	-11.1621	-10.8354	-48.0776
1946	-29.6277	-14.3892	-10.2682	-80.932	-10.9081	-47.647	39.9478	-11.1628	-10.7549	-44.8947
1947	-29.3133	-14.3918	-10.2636	-75.0305	-10.8076	-45.8119	35.9466	-11.1633	-10.6773	-41.9931
1948	-29.0101	-14.3944	-10.2589	-69.6548	-10.7135	-44.0723	32.2033	-11.1637	-10.6024	-39.3466
1949	-28.7176	-14.3969	-10.2543	-64.7561	-10.6252	-42.4228	28.6998	-11.164	-10.5302	-36.932
1950	-28.4355	-14.3994	-10.2496	-60.2903	-10.5425	-40.8583	25.4193	-11.1642	-10.4605	-34.7278
1951	-28.1634	-14.4018	-10.245	-56.2174	-10.4649	-39.3743	22.3462	-11.1643	-10.3932	-32.715
1952	-27.9009	-14.4042	-10.2403	-52.5015	-10.3921	-37.9663	19.4663	-11.1642	-10.3281	-30.8762
1953	-27.6476	-14.4065	-10.2356	-49.1099	-10.3237	-36.63	16.7664	-11.1641	-10.2653	-29.1955
1954	-27.4033	-14.4088	-10.2308	-46.0129	-10.2594	-35.3617	14.2344	-11.1639	-10.2046	-27.6588
1955	-27.1675	-14.411	-10.2261	-43.184	-10.199	-34.1575	11.859	-11.1636	-10.1459	-26.2531
1956	-26.9401	-14.4132	-10.2213	-40.5989	-10.1422	-33.0141	9.62988	-11.1632	-10.0891	-24.9667
1957	-26.7206	-14.4154	-10.2166	-38.2355	-10.0887	-31.928	7.53742	-11.1628	-10.0342	-23.7891
1958	-26.5088	-14.4175	-10.2118	-36.0742	-10.0383	-30.8962	5.57273	-11.1622	-9.98099	-22.7105
1959	-26.3045	-14.4195	-10.207	-34.0967	-9.99082	-29.9158	3.72756	-11.1616	-9.92952	-21.7222
1960	-26.1073	-14.4215	-10.2022	-32.2868	-9.94605	-28.984	1.99427	-11.161	-9.87966	-20.8164
1961	-25.9171	-14.4235	-10.1973	-30.6296	-9.9038	-28.0983	0.365758	-11.1602	-9.83136	-19.9857
1962	-28.8763	-14.4254	-10.1925	-29.1116	-9.86391	-27.2561	-1.16457	-11.1594	-9.78455	-19.2237
1963	-28.3414	-14.4273	-10.1876	-27.7207	-9.82622	-26.4552	-2.60284	-11.1586	-9.73916	-18.5243
1964	-27.8325	-14.4291	-10.1828	-26.4456	-9.79059	-25.6933	-3.95476	-11.1577	-9.69514	-17.8822
1965	-27.3482	-14.4309	-10.1779	-25.2763	-9.75687	-24.9685	-5.22563	-11.1567	-9.65242	-17.2924
1966	-26.8873	-14.4326	-10.173	-24.2037	-9.72496	-24.2788	-6.4204	-11.1557	-9.61096	-16.7505
1967	-26.4486	-14.4343	-10.168	-23.2193	-9.69471	-23.6222	-7.54367	-11.1546	-9.5707	-16.2524
1968	-26.031	-14.4359	-10.1631	-22.3156	-9.66604	-22.9972	-8.59974	-11.1535	-9.5316	-15.7943
1969	-25.6334	-14.4376	-10.1581	-21.4856	-9.63883	-22.4021	-9.59263	-11.1523	-9.4936	-15.3729
1970	-25.2549	-14.4391	-10.1532	-20.7231	-9.61299	-21.8352	-10.5261	-11.1511	-9.45666	-14.9851
1971	-24.8944	-14.4407	-10.1482	-20.0223	-9.58844	-21.2952	-11.4036	-11.1498	-9.42073	-14.6281
1972	-24.5511	-14.4421	-10.1432	-19.378	-9.56509	-20.7807	-12.2284	-11.1485	-9.38578	-14.2992
1973	-24.2242	-14.4436	-10.1381	-18.7855	-9.54286	-20.2904	-13.0037	-11.1472	-9.35177	-13.9963
1974	287.747	-14.445	-10.1331	-18.2403	-9.52168	-19.823	-13.7322	-11.1458	-9.31865	-13.717
1975	269.895	-14.4463	-10.1281	-17.7386	-9.50149	-19.3773	-14.4167	-11.1444	-9.2864	-13.4595
1976	253.203	-14.4477	-10.123	-17.2766	-9.48223	-18.9523	-15.0596	-11.143	-9.25497	-13.2219
1977	237.59	-14.4489	-10.1179	-16.8512	-9.46383	-18.547	-15.6633	-11.1415	-9.22433	-13.0027
1978	206.117	-14.4502	-10.1128	-16.4592	-9.44624	-18.1602	-16.2301	-11.14	-9.19445	-12.8004
1979	190.117	-14.4514	-10.1077	-16.098	-9.42941	-17.7912	-16.762	-11.1384	-9.1653	-12.6135
1980	175.371	-14.4526	-10.1025	-15.765	-9.4133	-17.439	-17.2609	-11.1368	-9.13685	-12.4409
1981	161.773	-14.4537	-10.0974	-15.4579	-9.39785	-17.1027	-17.7287	-11.1352	-9.10908	-12.2813
1982	149.227	-14.4548	-10.0922	-15.1746	-9.38304	-16.7817	-18.1671	-11.1336	-9.08195	-12.1338
1983	137.647	-14.4558	-10.087	-14.9132	-9.36881	-16.475	-18.5778	-11.1319	-15.0576	-11.9974
1984	126.954	-14.4568	-10.0818	-14.6719	-9.35514	-16.1821	-18.9622	-11.1302	-14.7825	-11.8712
1985	117.074	-14.4578	-10.0766	-14.4492	-9.34198	-15.9023	-19.3218	-11.1285	-14.5209	-11.7544
1986	107.942	-14.4587	-10.0713	-14.2434	-9.32931	-15.6348	-19.6579	-11.1267	-14.2721	-11.6462
1987	99.4971	-14.4596	-11.8434	-14.0533	-9.3171	-15.3791	-19.9718	-11.1249	-14.0355	-11.546
1988	91.6841	-14.4605	-11.7655	-13.8776	-9.30532	-15.1347	-20.2647	-11.1231	-13.8103	-11.4532
1989	84.4525	-14.4613	-11.6915	-13.7153	-9.29395	-14.9009	-20.5377	-11.1213	-13.5959	-11.3672
1990	77.7559	-14.462	-11.6212	-13.5651	-9.28295	-14.6774	-20.7919	-11.1194	-13.3919	-11.2874
1991	71.5521	-14.4628	-11.5545	-13.4263	-9.27231	-14.4635	-21.0283	-11.1176	-13.1975	-11.2134
1992	65.8022	-14.4635	-11.4911	-13.2978	-9.26201	-14.2588	-21.2478	-11.1157	-13.0123	-11.1447
1993	14.1671	-14.4642	-11.4308	-13.1789	-9.25202	-14.0629	-21.4514	-11.1137	-18.2197	-11.0809
1994	11.9526	-14.4648	-11.3735	-13.0689	-9.24232	-13.8753	-21.6398	-11.1118	-17.7021	-11.0217
1995	9.92989	-14.4654	-11.3189	-12.9671	-60.517	-13.6957	-21.8138	-11.1098	-17.2173	-10.9667
1996	8.08153	-14.4659	-11.267	-12.8728	-57.2323	-13.5237	-21.9743	-11.1078	-16.7631	-10.9156
1997	6.39159	-14.4665	-11.2175	-12.7854	-54.1724	-13.359	-22.122	-11.1058	-16.3372	-10.8681
1998	4.8457	-14.467	-11.1704	-12.7045	-51.3209	-13.2011	-22.2574	-11.1037	-15.938	-10.8239
[truncated: 8,001 more rows]

## Sheet: Supplement_w
	0	1	2	3	4	5	6	7	8	9
0	0.372542	10.6294	0.464422	0.0597662	17.2401	19.5991	30.6471	0.375393	2.91964	29.5221
1	0.371224	10.619	0.466829	0.0612171	17.2229	19.5788	30.6128	0.376638	2.91566	29.4911
2	0.369904	10.6086	0.469213	0.0626694	17.2057	19.5585	30.5786	0.377878	2.91169	29.4601
3	0.368584	10.5982	0.471576	0.0641225	17.1885	19.5382	30.5444	0.379113	2.90772	29.4292
4	0.367262	10.5879	0.473918	0.065576	17.1713	19.5179	30.5102	0.380343	2.90376	29.3982
5	0.365941	10.5775	0.47624	0.0670292	17.1542	19.4976	30.4761	0.381569	2.8998	29.3672
6	0.364619	10.5672	0.478544	0.0684818	17.1371	19.4774	30.442	0.382789	2.89584	29.3362
7	0.363296	10.5568	0.480829	0.0699333	17.1199	19.4571	30.4079	0.384005	2.89189	29.3053
8	0.361973	10.5465	0.483096	0.0713832	17.1028	19.4369	30.3739	0.385216	2.88795	29.2743
9	0.36065	10.5362	0.485347	0.0728313	17.0857	19.4167	30.3399	0.386422	2.884	29.2434
10	0.359327	10.5259	0.487581	0.0742773	17.0686	19.3965	30.306	0.387623	2.88007	29.2124
11	0.358003	10.5156	0.489799	0.0757207	17.0516	19.3763	30.272	0.388818	2.87613	29.1815
12	0.35668	10.5053	0.492001	0.0771614	17.0345	19.3562	30.2382	0.390009	2.8722	29.1505
13	0.355357	10.495	0.494189	0.078599	17.0175	19.3361	30.2043	0.391195	2.86828	29.1196
14	0.354034	10.4847	0.496362	0.0800333	17.0004	19.3159	30.1705	0.392375	2.86436	29.0887
15	0.352711	10.4744	0.498521	0.0814641	16.9834	19.2958	30.1367	0.39355	2.86044	29.0578
16	0.351388	10.4641	0.500667	0.0828912	16.9664	19.2757	30.103	0.394721	2.85653	29.0269
17	0.350065	10.4539	0.502799	0.0843144	16.9494	19.2557	30.0693	0.395886	2.85262	28.9961
18	0.348743	10.4436	0.504918	0.0857336	16.9324	19.2356	30.0356	0.397045	2.84872	28.9652
19	0.347422	10.4334	0.507024	0.0871485	16.9155	19.2156	30.002	0.3982	2.84482	28.9344
20	0.346101	10.4232	0.509118	0.088559	16.8985	19.1956	29.9684	0.39935	2.84093	28.9036
21	0.34478	10.4129	0.5112	0.089965	16.8816	19.1755	29.9348	0.400494	2.83704	28.8728
22	0.34346	10.4027	0.51327	0.0913664	16.8647	19.1556	29.9013	0.401633	2.83315	28.842
23	0.34214	10.3925	0.515328	0.092763	16.8477	19.1356	29.8678	0.402767	2.82927	28.8113
24	0.340822	10.3823	0.517375	0.0941547	16.8308	19.1156	29.8343	0.403895	2.8254	28.7806
25	0.339503	10.3721	0.519411	0.0955415	16.814	19.0957	29.8009	0.405018	2.82153	28.7499
26	0.338186	10.362	0.521435	0.0969232	16.7971	19.0758	29.7675	0.406136	2.81766	28.7192
27	0.33687	10.3518	0.523449	0.0982997	16.7802	19.0559	29.7341	0.407249	2.81379	28.6885
28	0.335554	10.3416	0.525453	0.099671	16.7634	19.036	29.7008	0.408356	2.80994	28.6579
29	0.334239	10.3315	0.527445	0.101037	16.7466	19.0161	29.6675	0.409459	2.80608	28.6273
30	0.332925	10.3213	0.529428	0.102398	16.7297	18.9962	29.6343	0.410555	2.80223	28.5967
31	0.331612	10.3112	0.5314	0.103753	16.7129	18.9764	29.601	0.411647	2.79839	28.5661
32	0.3303	10.301	0.533363	0.105103	16.6962	18.9566	29.5679	0.412733	2.79455	28.5355
33	0.328988	10.2909	0.535315	0.106447	16.6794	18.9368	29.5347	0.413814	2.79071	28.505
34	0.327678	10.2808	0.537258	0.107786	16.6626	18.917	29.5016	0.41489	2.78688	28.4745
35	0.326369	10.2707	0.539191	0.109119	16.6459	18.8972	29.4685	0.41596	2.78305	28.444
36	0.325061	10.2606	0.541115	0.110446	16.6291	18.8774	29.4355	0.417025	2.77923	28.4136
37	0.323754	10.2505	0.543029	0.111768	16.6124	18.8577	29.4025	0.418085	2.77541	28.3832
38	0.322449	10.2404	0.544934	0.113084	16.5957	18.838	29.3695	0.419139	2.77159	28.3528
39	0.321144	10.2304	0.54683	0.114395	16.579	18.8183	29.3365	0.420188	2.76778	28.3224
40	0.31984	10.2203	0.548717	0.115699	16.5623	18.7986	29.3036	0.421232	2.76398	28.292
41	0.318538	10.2103	0.550594	0.116998	16.5457	18.7789	29.2707	0.42227	2.76018	28.2617
42	0.317237	10.2002	0.552463	0.118291	16.529	18.7592	29.2379	0.423303	2.75638	28.2314
43	0.315937	10.1902	0.554322	0.119578	16.5124	18.7396	29.2051	0.424331	2.75259	28.2011
44	0.314639	10.1801	0.556173	0.120859	16.4958	18.7199	29.1723	0.425353	2.7488	28.1709
45	0.313342	10.1701	0.558015	0.122135	16.4791	18.7003	29.1396	0.42637	2.74502	28.1407
46	0.312046	10.1601	0.559848	0.123404	16.4625	18.6807	29.1069	0.427382	2.74124	28.1105
47	0.310751	10.1501	0.561673	0.124668	16.446	18.6612	29.0742	0.428389	2.73746	28.0803
48	0.309458	10.1401	0.563489	0.125926	16.4294	18.6416	29.0416	0.42939	2.73369	28.0502
49	0.308166	10.1301	0.565297	0.127178	16.4128	18.622	29.0089	0.430386	2.72993	28.0201
50	0.306875	10.1202	0.567096	0.128424	16.3963	18.6025	28.9764	0.431377	2.72617	27.99
51	0.305586	10.1102	0.568887	0.129664	16.3798	18.583	28.9438	0.432362	2.72241	27.9599
52	0.304298	10.1002	0.570669	0.130898	16.3632	18.5635	28.9113	0.433342	2.71866	27.9299
53	0.303012	10.0903	0.572444	0.132126	16.3467	18.544	28.8789	0.434317	2.71491	27.8999
54	0.301727	10.0803	0.574209	0.133348	16.3302	18.5246	28.8464	0.435287	2.71117	27.8699
55	0.300444	10.0704	0.575967	0.134565	16.3138	18.5051	28.814	0.436251	2.70743	27.84
56	0.299162	10.0605	0.577716	0.135775	16.2973	18.4857	28.7817	0.43721	2.70369	27.8101
57	0.297881	10.0506	0.579458	0.13698	16.2809	18.4662	28.7493	0.438164	2.69996	27.7802
58	0.296602	10.0407	0.581191	0.138179	16.2644	18.4468	28.717	0.439113	2.69624	27.7503
59	0.295324	10.0308	0.582916	0.139371	16.248	18.4275	28.6847	0.440056	2.69251	27.7205
60	0.294048	10.0209	0.584633	0.140558	16.2316	18.4081	28.6525	0.440994	2.6888	27.6906
61	0.292774	10.011	0.586342	0.141739	16.2152	18.3887	28.6203	0.441927	2.68508	27.6609
62	0.291638	10.0011	0.588043	0.142914	16.1988	18.3694	28.5881	0.442855	2.68138	27.6311
63	0.290634	9.99124	0.589737	0.144083	16.1824	18.3501	28.556	0.443778	2.67767	27.6014
64	0.289754	9.98139	0.591422	0.145246	16.166	18.3308	28.5239	0.444695	2.67397	27.5717
65	0.288992	9.97154	0.593099	0.146404	16.1496	18.3115	28.4918	0.445607	2.67028	27.542
66	0.288342	9.9617	0.594769	0.147555	16.1332	18.2922	28.4598	0.446514	2.66659	27.5123
67	0.287799	9.95187	0.596431	0.148701	16.1168	18.273	28.4278	0.447416	2.6629	27.4827
68	0.287356	9.94205	0.598085	0.14984	16.1004	18.2537	28.3958	0.448313	2.65922	27.4531
69	0.287008	9.93224	0.599731	0.150974	16.084	18.2345	28.3639	0.449204	2.65554	27.4236
70	0.286752	9.92243	0.601369	0.152102	16.0676	18.2153	28.332	0.450091	2.65187	27.394
71	0.286581	9.91264	0.603	0.153224	16.0512	18.1961	28.3001	0.450972	2.6482	27.3645
72	0.286492	9.90285	0.604571	0.154341	16.0349	18.1769	28.2683	0.451848	2.64454	27.335
73	0.28648	9.89307	0.606084	0.155451	16.0185	18.1577	28.2365	0.452719	2.64088	27.3056
74	0.286542	9.8833	0.607544	0.156556	16.0022	18.1386	28.2047	0.453585	2.63722	27.2762
75	0.286675	9.87354	0.608953	0.157655	15.9858	18.1195	28.173	0.454446	2.63357	27.2467
76	0.286873	9.86379	0.610313	0.158748	15.9695	18.1004	28.1413	0.455302	2.62991	27.2173
77	0.287135	9.85404	0.611629	0.159835	15.9531	18.0813	28.1096	0.456153	2.62626	27.1879
78	0.287456	9.84431	0.612901	0.160917	15.9368	18.0622	28.078	0.456998	2.62261	27.1586
79	0.287835	9.83458	0.614133	0.161992	15.9205	18.0431	28.0463	0.457839	2.61896	27.1292
80	0.288267	9.82486	0.615326	0.163062	15.9042	18.0241	28.0148	0.458674	2.61531	27.0999
81	0.288752	9.81515	0.616482	0.164127	15.8879	18.005	27.9832	0.459505	2.61167	27.0706
82	0.289285	9.80545	0.617604	0.165185	15.8716	17.986	27.9517	0.46033	2.60802	27.0414
83	0.289864	9.79576	0.618693	0.166238	15.8553	17.967	27.9203	0.461151	2.60438	27.0124
84	0.290488	9.78607	0.619751	0.167285	15.8391	17.948	27.8888	0.461966	2.60074	26.9835
85	0.291154	9.7764	0.620779	0.168326	15.8228	17.9291	27.8574	0.462777	2.5971	26.9547
86	0.29186	9.76673	0.621779	0.169362	15.8065	17.9101	27.826	0.463583	2.59346	26.926
87	0.292603	9.75707	0.622753	0.170392	15.7903	17.8912	27.7947	0.464383	2.58982	26.8974
88	0.293383	9.74742	0.623701	0.171417	15.7741	17.8722	27.7634	0.465179	2.58619	26.869
89	0.294198	9.73778	0.624624	0.172436	15.7578	17.8533	27.7321	0.465969	2.58256	26.8406
90	0.295044	9.72815	0.625524	0.173449	15.7416	17.8344	27.701	0.466755	2.57893	26.8123
91	0.295922	9.71852	0.626403	0.174456	15.7254	17.8156	27.6701	0.467536	2.5753	26.7841
92	0.29683	9.70891	0.62726	0.175458	15.7092	17.7967	27.6393	0.468312	2.57168	26.756
93	0.297765	9.6993	0.628096	0.176454	15.6931	17.7779	27.6087	0.469083	2.56805	26.7279
94	0.298728	9.6897	0.628914	0.177445	15.6769	17.759	27.5782	0.469849	2.56443	26.6999
95	0.299715	9.68011	0.629713	0.17843	15.6607	17.7402	27.548	0.47061	2.56082	26.672
96	0.300727	9.67053	0.630494	0.17941	15.6446	17.7214	27.5178	0.471367	2.5572	26.6441
97	0.301761	9.66096	0.631258	0.180384	15.6285	17.7027	27.4878	0.472119	2.55359	26.6164
98	0.302817	9.65139	0.632006	0.181353	15.6123	17.6839	27.4579	0.472865	2.54998	26.5886
99	0.303894	9.64184	0.632739	0.182316	15.5962	17.6651	27.4282	0.473607	2.54637	26.5609
100	0.30499	9.63229	0.633456	0.183273	15.5801	17.6464	27.3986	0.474344	2.54277	26.5333
101	0.306105	9.62275	0.634158	0.184225	15.564	17.6277	27.3691	0.475041	2.53917	26.5057
102	0.307238	9.61322	0.634847	0.185172	15.548	17.609	27.3397	0.475699	2.53557	26.4782
103	0.308387	9.6037	0.635522	0.186113	15.5319	17.5903	27.3105	0.476319	2.53198	26.4507
104	0.309552	9.59419	0.636184	0.187049	15.5158	17.5716	27.2814	0.476903	2.52838	26.4233
105	0.310732	9.58468	0.636834	0.187979	15.4998	17.553	27.2524	0.477453	2.52479	26.3959
106	0.311927	9.57519	0.637471	0.188904	15.4838	17.5344	27.2234	0.477969	2.52121	26.3685
107	0.313134	9.5657	0.638097	0.189823	15.4678	17.5157	27.1946	0.478452	2.51762	26.3412
108	0.314355	9.55622	0.638711	0.190737	15.4518	17.4971	27.1659	0.478904	2.51404	26.314
109	0.315587	9.54674	0.639314	0.191646	15.4358	17.4785	27.1373	0.479326	2.51047	26.2867
110	0.316831	9.53728	0.639906	0.192549	15.4198	17.46	27.1088	0.47972	2.50689	26.2595
111	0.318086	9.52782	0.640488	0.193447	15.4038	17.4414	27.0804	0.480085	2.50332	26.2324
112	0.319351	9.51837	0.64106	0.19434	15.3879	17.4228	27.0521	0.480423	2.49976	26.2053
113	0.320625	9.50892	0.641622	0.195227	15.3719	17.4043	27.0238	0.480735	2.49619	26.1782
114	0.321908	9.49949	0.642175	0.196109	15.356	17.3857	26.9957	0.481022	2.49263	26.1511
115	0.323199	9.49006	0.642718	0.196986	15.3401	17.3671	26.9676	0.481285	2.48907	26.1241
116	0.324499	9.48064	0.643252	0.197857	15.3242	17.3486	26.9396	0.481524	2.48552	26.0971
117	0.325806	9.47123	0.643777	0.198723	15.3083	17.33	26.9117	0.481741	2.48197	26.0702
118	0.32712	9.46182	0.644293	0.199584	15.2924	17.3114	26.8839	0.481935	2.47842	26.0433
119	0.32844	9.45242	0.644801	0.20044	15.2765	17.2928	26.8562	0.482109	2.47488	26.0164
120	0.329766	9.44303	0.645301	0.20129	15.2607	17.2743	26.8285	0.482262	2.47134	25.9895
121	0.331098	9.43365	0.645793	0.202135	15.2449	17.2557	26.8009	0.482396	2.4678	25.9627
122	0.332435	9.42427	0.646277	0.202975	15.229	17.2371	26.7734	0.48251	2.46426	25.9359
123	0.333777	9.41491	0.646753	0.20381	15.2132	17.2185	26.7459	0.482606	2.46073	25.9091
124	0.335124	9.40555	0.647221	0.20464	15.1974	17.2	26.7185	0.482684	2.45721	25.8824
125	0.336474	9.39619	0.647682	0.205464	15.1816	17.1814	26.6912	0.482745	2.45368	25.8557
126	0.337828	9.38685	0.648136	0.206284	15.1659	17.1629	26.6639	0.482789	2.45016	25.829
127	0.339186	9.37751	0.648582	0.207098	15.1501	17.1443	26.6367	0.482817	2.44665	25.8023
128	0.340547	9.36819	0.649021	0.207907	15.1344	17.1258	26.6096	0.482829	2.44313	25.7757
129	0.34191	9.35887	0.649454	0.208711	15.1186	17.1072	26.5825	0.482826	2.43963	25.7491
130	0.343276	9.34955	0.649879	0.20951	15.1029	17.0887	26.5555	0.482809	2.43612	25.7225
131	0.344645	9.34025	0.650298	0.210304	15.0872	17.0702	26.5286	0.482777	2.43262	25.6959
132	0.346015	9.33095	0.65071	0.211093	15.0715	17.0516	26.5017	0.482731	2.42912	25.6694
133	0.347387	9.32166	0.651116	0.211876	15.0558	17.0331	26.4749	0.482672	2.42562	25.6429
134	0.34876	9.31238	0.651515	0.212655	15.0402	17.0146	26.448	0.482601	2.42213	25.6164
135	0.350135	9.30311	0.651908	0.213429	15.0245	16.9961	26.4212	0.482516	2.41865	25.59
136	0.35151	9.29384	0.652295	0.214198	15.0089	16.9776	26.3945	0.48242	2.41516	25.5636
137	0.352887	9.28459	0.652675	0.214961	14.9933	16.9591	26.3677	0.482311	2.41168	25.5372
138	0.354219	9.27534	0.653049	0.21572	14.9777	16.9406	26.3409	0.482192	2.40821	25.5108
139	0.355508	9.2661	0.653418	0.216474	14.9621	16.9222	26.3142	0.482061	2.40473	25.4844
140	0.356757	9.25686	0.65378	0.217223	14.9465	16.9037	26.2875	0.481919	2.40126	25.4581
141	0.357966	9.24764	0.654136	0.217967	14.9309	16.8853	26.2608	0.481767	2.3978	25.4318
142	0.359138	9.23842	0.654487	0.218706	14.9153	16.8668	26.2341	0.481605	2.39434	25.4055
143	0.360274	9.22921	0.654832	0.21944	14.8998	16.8484	26.2074	0.481433	2.39088	25.3793
144	0.361374	9.22001	0.655171	0.22017	14.8843	16.83	26.1807	0.481251	2.38743	25.3531
145	0.362442	9.21082	0.655505	0.220894	14.8687	16.8116	26.1541	0.481038	2.38398	25.3269
146	0.363477	9.20163	0.655832	0.221614	14.8532	16.7931	26.1275	0.480796	2.38053	25.3007
147	0.364481	9.19245	0.656155	0.222328	14.8378	16.7748	26.1009	0.480505	2.37709	25.2745
148	0.365455	9.18328	0.656472	0.223038	14.8223	16.7564	26.0743	0.480167	2.37365	25.2484
149	0.366401	9.17412	0.656783	0.223743	14.8068	16.738	26.0477	0.479788	2.37021	25.2223
150	0.367319	9.16497	0.657089	0.224444	14.7914	16.7197	26.0212	0.479367	2.36678	25.1962
151	0.368211	9.15583	0.65739	0.225139	14.7759	16.7013	25.9946	0.47891	2.36335	25.1702
152	0.369076	9.14669	0.657686	0.22583	14.7605	16.683	25.9681	0.478416	2.35993	25.1441
153	0.369917	9.13756	0.657976	0.226516	14.7451	16.6646	25.9416	0.47789	2.35651	25.1181
154	0.370735	9.12844	0.658261	0.227197	14.7297	16.6463	25.9151	0.477333	2.35309	25.0921
155	0.371529	9.11933	0.658541	0.227874	14.7143	16.6282	25.8887	0.476747	2.34968	25.0662
156	0.372301	9.11022	0.658816	0.228546	14.699	16.6101	25.8623	0.476133	2.34627	25.0402
157	0.373052	9.10112	0.659085	0.229213	14.6836	16.5922	25.8358	0.475494	2.34287	25.0143
158	0.373782	9.09203	0.65935	0.229876	14.6683	16.5744	25.8095	0.47483	2.33947	24.9884
159	0.374492	9.08295	0.65961	0.230533	14.6529	16.5568	25.7833	0.474144	2.33607	24.9625
160	0.375182	9.07388	0.659864	0.231187	14.6376	16.5392	25.7572	0.473437	2.33268	24.9367
161	0.375854	9.06482	0.660114	0.231835	14.6223	16.5217	25.7313	0.47271	2.32929	24.9109
162	0.376508	9.05576	0.660359	0.232479	14.607	16.5044	25.7054	0.471964	2.32591	24.8851
163	0.377145	9.04671	0.660599	0.233118	14.5918	16.4871	25.6796	0.471201	2.32252	24.8593
164	0.377764	9.03767	0.660834	0.233753	14.5765	16.47	25.6538	0.470421	2.31915	24.8335
165	0.378368	9.02864	0.661064	0.234383	14.5613	16.4529	25.6282	0.469625	2.31577	24.8078
166	0.378955	9.01961	0.661289	0.235009	14.546	16.4359	25.6026	0.468815	2.3124	24.7821
167	0.379527	9.0106	0.66151	0.23563	14.5308	16.419	25.5772	0.467991	2.30904	24.7564
168	0.380084	9.00159	0.661726	0.236246	14.5156	16.4022	25.5518	0.467154	2.30568	24.7307
169	0.380627	8.99259	0.661937	0.236858	14.5004	16.3854	25.5264	0.466305	2.30232	24.7051
170	0.381123	8.9836	0.662144	0.237466	14.4853	16.3688	25.5012	0.465445	2.29896	24.6795
171	0.381575	8.97461	0.662346	0.238069	14.4701	16.3522	25.476	0.464574	2.29561	24.6539
172	0.381985	8.96563	0.662543	0.238667	14.4549	16.3356	25.4509	0.463692	2.29227	24.6283
173	0.382355	8.95667	0.662736	0.239261	14.4398	16.3192	25.4258	0.462801	2.28892	24.6027
174	0.382688	8.94771	0.662924	0.239851	14.4247	16.3028	25.4008	0.461902	2.28559	24.5772
175	0.382985	8.93875	0.663108	0.240436	14.4096	16.2864	25.3758	0.460993	2.28225	24.5517
176	0.383249	8.92981	0.663287	0.241017	14.3945	16.2701	25.351	0.460077	2.27892	24.5262
177	0.38348	8.92087	0.663461	0.241593	14.3794	16.2539	25.3261	0.459153	2.27559	24.5007
178	0.38368	8.91195	0.663632	0.242165	14.3643	16.2378	25.3013	0.458222	2.27227	24.4753
179	0.383851	8.90303	0.663797	0.242733	14.3493	16.2216	25.2766	0.457284	2.26895	24.4499
180	0.383995	8.89411	0.663958	0.243296	14.3342	16.2056	25.2519	0.45634	2.26564	24.4245
181	0.384113	8.88521	0.664115	0.243855	14.3192	16.1896	25.2273	0.455391	2.26233	24.3991
182	0.384205	8.87631	0.664268	0.244409	14.3042	16.1736	25.2027	0.454435	2.25902	24.3737
183	0.384274	8.86743	0.664416	0.244959	14.2892	16.1577	25.1782	0.453474	2.25572	24.3484
184	0.38432	8.85855	0.664559	0.245505	14.2742	16.1418	25.1537	0.452509	2.25242	24.3231
185	0.384345	8.84967	0.664699	0.246047	14.2593	16.126	25.1292	0.451538	2.24912	24.2978
186	0.384349	8.84081	0.664834	0.246554	14.2443	16.1102	25.1048	0.450564	2.24583	24.2725
187	0.384334	8.83195	0.664965	0.247028	14.2293	16.0945	25.0804	0.449585	2.24254	24.2473
188	0.3843	8.82311	0.665091	0.247471	14.2144	16.0787	25.0561	0.448602	2.23926	24.2221
189	0.384248	8.81427	0.665213	0.247884	14.1995	16.0631	25.0318	0.447615	2.23598	24.1969
190	0.384179	8.80543	0.665331	0.248268	14.1845	16.0475	25.0076	0.446625	2.2327	24.1717
191	0.384093	8.79661	0.665445	0.248624	14.1696	16.0319	24.9834	0.445632	2.22943	24.1465
192	0.383993	8.78779	0.665555	0.248953	14.1547	16.0163	24.9592	0.444636	2.22616	24.1214
193	0.383877	8.77898	0.66566	0.249257	14.1398	16.0008	24.9351	0.443636	2.2229	24.0963
194	0.383747	8.77018	0.665762	0.249537	14.1249	15.9853	24.911	0.442634	2.21964	24.0712
195	0.383604	8.76139	0.665859	0.249793	14.1101	15.9699	24.8869	0.44163	2.21638	24.0461
196	0.383448	8.75261	0.665952	0.250026	14.0952	15.9544	24.8629	0.440623	2.21313	24.0211
197	0.383279	8.74383	0.666041	0.250237	14.0803	15.9392	24.8389	0.439613	2.20988	23.9961
198	0.383098	8.73506	0.666125	0.250428	14.0655	15.924	24.8149	0.438602	2.20664	23.9711
199	0.382906	8.7263	0.666206	0.250599	14.0506	15.9089	24.791	0.437588	2.2034	23.9461
200	0.382703	8.71755	0.666283	0.25075	14.0358	15.8939	24.7671	0.436573	2.20016	23.9211
201	0.382489	8.70881	0.666356	0.250883	14.021	15.879	24.7432	0.435555	2.19693	23.8962
202	0.382265	8.70007	0.666424	0.250998	14.0062	15.8643	24.7194	0.434536	2.1937	23.8713
203	0.382032	8.69134	0.666489	0.251096	13.9913	15.8496	24.6956	0.433516	2.19048	23.8464
204	0.381789	8.68262	0.66655	0.251177	13.9765	15.835	24.6718	0.432494	2.18726	23.8215
205	0.381538	8.67391	0.666607	0.251243	13.9618	15.8205	24.6481	0.43147	2.18404	23.7967
206	0.381277	8.6652	0.666659	0.251293	13.947	15.806	24.6244	0.430446	2.18083	23.7718
207	0.381009	8.65651	0.666708	0.251328	13.9322	15.7917	24.6007	0.42942	2.17762	23.747
208	0.380732	8.64782	0.666753	0.25135	13.9174	15.7774	24.577	0.428393	2.17441	23.7222
209	0.380448	8.63914	0.666794	0.251357	13.9027	15.7631	24.5534	0.427365	2.17121	23.6975
210	0.380156	8.63046	0.666831	0.251352	13.8879	15.749	24.5298	0.426335	2.16801	23.6727
211	0.379857	8.6218	0.666865	0.251333	13.8732	15.7349	24.5063	0.425305	2.16482	23.648
212	0.379551	8.61314	0.666894	0.251303	13.8585	15.7209	24.4827	0.424274	2.16163	23.6233
213	0.379239	8.60449	0.66692	0.25126	13.8438	15.7069	24.4592	0.423243	2.15845	23.5986
214	0.37892	8.59585	0.666942	0.251206	13.8291	15.693	24.4357	0.42221	2.15527	23.574
215	0.378594	8.58722	0.66696	0.251141	13.8144	15.6791	24.4122	0.421177	2.15209	23.5493
216	0.378263	8.57859	0.666974	0.251066	13.7997	15.6653	24.3888	0.420143	2.14891	23.5247
217	0.377926	8.56997	0.666984	0.25098	13.7851	15.6516	24.3654	0.419109	2.14574	23.5001
218	0.377583	8.56136	0.666991	0.250884	13.7704	15.6379	24.342	0.418074	2.14258	23.4756
219	0.377235	8.55276	0.666994	0.250778	13.7558	15.6243	24.3186	0.417039	2.13942	23.451
220	0.376882	8.54417	0.666993	0.250663	13.7412	15.6107	24.2953	0.416003	2.13626	23.4265
221	0.376523	8.53558	0.666989	0.250539	13.7265	15.5971	24.272	0.414966	2.13311	23.402
222	0.37616	8.527	0.666981	0.250406	13.7119	15.5836	24.2487	0.41393	2.12996	23.3775
223	0.375791	8.51843	0.666969	0.250265	13.6973	15.5702	24.2254	0.412893	2.12681	23.353
224	0.375418	8.50987	0.666953	0.250116	13.6828	15.5567	24.2022	0.411856	2.12367	23.3286
225	0.375041	8.50131	0.666934	0.249959	13.6682	15.5434	24.179	0.410818	2.12053	23.3042
226	0.374659	8.49277	0.666911	0.249794	13.6537	15.53	24.1558	0.40978	2.1174	23.2798
227	0.374272	8.48423	0.666885	0.249621	13.6391	15.5168	24.1326	0.408742	2.11427	23.2554
228	0.373882	8.47569	0.666855	0.249442	13.6246	15.5035	24.1095	0.407704	2.11114	23.231
229	0.373487	8.46717	0.666821	0.249255	13.6101	15.4903	24.0864	0.406666	2.10802	23.2067
230	0.373089	8.45865	0.666784	0.249061	13.5956	15.4771	24.0633	0.405628	2.1049	23.1824
231	0.372686	8.45015	0.666743	0.248861	13.5811	15.464	24.0402	0.404589	2.10178	23.1581
232	0.37228	8.44165	0.666699	0.248655	13.5666	15.4509	24.0171	0.403551	2.09867	23.1338
233	0.37187	8.43315	0.666651	0.248442	13.5521	15.4378	23.9941	0.402512	2.09557	23.1096
234	0.371457	8.42467	0.6666	0.248223	13.5376	15.4248	23.9711	0.401474	2.09246	23.0853
235	0.37104	8.41619	0.666545	0.247999	13.5232	15.4118	23.9481	0.400435	2.08936	23.0611
236	0.370619	8.40772	0.666486	0.247768	13.5088	15.3988	23.9251	0.399397	2.08627	23.0369
237	0.370196	8.39926	0.666425	0.247532	13.4943	15.3859	23.9022	0.398358	2.08318	23.0128
238	0.369769	8.39081	0.666359	0.247291	13.4799	15.373	23.8792	0.39732	2.08009	22.9886
239	0.369339	8.38236	0.66629	0.247044	13.4655	15.3602	23.8563	0.396282	2.07701	22.9645
240	0.368905	8.37392	0.666218	0.246793	13.4511	15.3473	23.8335	0.395244	2.07393	22.9404
241	0.368469	8.36549	0.666143	0.246536	13.4367	15.3345	23.8106	0.394206	2.07085	22.9163
242	0.36803	8.35707	0.666064	0.246274	13.4224	15.3218	23.7878	0.393168	2.06778	22.8922
243	0.367588	8.34865	0.665981	0.246008	13.408	15.309	23.7649	0.39213	2.06471	22.8682
244	0.367143	8.34025	0.665896	0.245737	13.3937	15.2963	23.7421	0.391093	2.06165	22.8442
245	0.366695	8.33185	0.665806	0.245462	13.3794	15.2836	23.7194	0.390056	2.05859	22.8202
246	0.366244	8.32346	0.665714	0.245182	13.3651	15.271	23.6966	0.389019	2.05553	22.7962
247	0.365774	8.31507	0.665618	0.244898	13.3508	15.2584	23.6739	0.387982	2.05248	22.7723
248	0.365285	8.3067	0.665519	0.244609	13.3365	15.2458	23.6512	0.386945	2.04943	22.7483
249	0.364778	8.29833	0.665417	0.2443	13.3222	15.2332	23.6285	0.385909	2.04639	22.7244
250	0.364254	8.28997	0.665311	0.24397	13.3079	15.2207	23.6058	0.384873	2.04335	22.7005
251	0.363714	8.28161	0.665202	0.24362	13.2937	15.2082	23.5831	0.383837	2.04031	22.6766
252	0.363159	8.27327	0.66509	0.243252	13.2795	15.1957	23.5605	0.382802	2.03728	22.6528
253	0.362589	8.26493	0.664974	0.242867	13.2652	15.1832	23.5379	0.381767	2.03425	22.6289
254	0.362006	8.2566	0.664855	0.242464	13.251	15.1708	23.5153	0.380732	2.03123	22.6051
255	0.36141	8.24828	0.664733	0.242046	13.2368	15.1584	23.4927	0.379697	2.02821	22.5813
256	0.360802	8.23996	0.664608	0.241613	13.2226	15.146	23.4701	0.378663	2.02519	22.5576
257	0.360182	8.23166	0.66448	0.241165	13.2085	15.1337	23.4476	0.377629	2.02218	22.5338
258	0.359552	8.22336	0.664348	0.240704	13.1943	15.1214	23.4251	0.376596	2.01917	22.5101
259	0.35891	8.21507	0.664213	0.240229	13.1802	15.1091	23.4026	0.375563	2.01616	22.4864
260	0.358259	8.20678	0.664075	0.239742	13.1661	15.0968	23.3801	0.37453	2.01316	22.4627
261	0.357599	8.1985	0.663934	0.239243	13.1519	15.0846	23.3576	0.373498	2.01016	22.439
262	0.356929	8.19023	0.66379	0.238733	13.1378	15.0724	23.3352	0.372466	2.00717	22.4154
263	0.356251	8.18197	0.663643	0.238212	13.1237	15.0602	23.3127	0.371434	2.00418	22.3918
264	0.355565	8.17371	0.663493	0.23768	13.1097	15.0481	23.2903	0.370403	2.00119	22.3682
265	0.354871	8.16546	0.663339	0.237139	13.0956	15.0359	23.2679	0.369373	1.99821	22.3446
266	0.354169	8.15722	0.663183	0.236588	13.0816	15.0238	23.2456	0.368343	1.99523	22.321
267	0.353461	8.14898	0.663023	0.236028	13.0675	15.0117	23.2232	0.367313	1.99226	22.2975
268	0.352746	8.14075	0.66286	0.23546	13.0535	14.9997	23.2009	0.366284	1.98929	22.274
269	0.352025	8.13253	0.662695	0.234884	13.0395	14.9877	23.1786	0.365255	1.98632	22.2505
270	0.351298	8.12431	0.662526	0.234299	13.0255	14.9757	23.1563	0.364226	1.98336	22.227
271	0.350565	8.1161	0.662354	0.233707	13.0115	14.9637	23.134	0.363198	1.9804	22.2035
272	0.349826	8.1079	0.66218	0.233109	12.9976	14.9517	23.1117	0.362171	1.97744	22.1801
273	0.349083	8.09971	0.662002	0.232503	12.9836	14.9398	23.0895	0.361144	1.97449	22.1567
274	0.348334	8.09152	0.661821	0.23189	12.9697	14.9279	23.0673	0.360118	1.97155	22.1333
275	0.347581	8.08334	0.661638	0.231272	12.9557	14.916	23.0451	0.359092	1.9686	22.1099
276	0.346823	8.07516	0.661451	0.230647	12.9418	14.9042	23.0229	0.358067	1.96566	22.0865
277	0.34606	8.06699	0.661262	0.230017	12.9279	14.8924	23.0007	0.357042	1.96273	22.0632
278	0.345294	8.05883	0.661069	0.229381	12.914	14.8806	22.9785	0.356017	1.9598	22.0399
279	0.344524	8.05068	0.660874	0.22874	12.9002	14.8688	22.9564	0.354993	1.95687	22.0166
280	0.34375	8.04253	0.660676	0.228094	12.8863	14.8571	22.9343	0.35397	1.95394	21.9933
281	0.342972	8.0344	0.660475	0.227443	12.8725	14.8454	22.9122	0.352947	1.95102	21.9701
282	0.342191	8.02626	0.660271	0.226788	12.8586	14.8337	22.8901	0.351925	1.94811	21.9468
283	0.341406	8.01814	0.660064	0.226128	12.8448	14.822	22.868	0.350904	1.94519	21.9236
284	0.340619	8.01002	0.659854	0.225464	12.831	14.8104	22.846	0.349883	1.94228	21.9004
285	0.339828	8.00191	0.659642	0.224796	12.8172	14.7988	22.8239	0.348862	1.93938	21.8772
286	0.339035	7.9938	0.659427	0.224124	12.8034	14.7872	22.8019	0.347842	1.93648	21.8541
287	0.338239	7.98571	0.659209	0.223449	12.7897	14.7757	22.7799	0.346823	1.93358	21.831
288	0.33744	7.97762	0.658988	0.222769	12.7759	14.7642	22.758	0.345804	1.93069	21.8078
289	0.336638	7.96954	0.658764	0.222087	12.7622	14.7527	22.736	0.344786	1.9278	21.7848
290	0.335835	7.96146	0.658538	0.221401	12.7484	14.7413	22.714	0.343768	1.92491	21.7617
291	0.335029	7.95339	0.658309	0.220712	12.7347	14.7298	22.6921	0.342752	1.92203	21.7386
292	0.33422	7.94533	0.658077	0.22002	12.721	14.7184	22.6702	0.341735	1.91915	21.7156
293	0.33341	7.93728	0.657842	0.219325	12.7073	14.7071	22.6483	0.340719	1.91628	21.6926
294	0.332598	7.92923	0.657716	0.218627	12.6937	14.6957	22.6264	0.339704	1.91341	21.6696
295	0.331783	7.92119	0.657693	0.217927	12.68	14.6844	22.6046	0.33869	1.91054	21.6466
296	0.330967	7.91316	0.657768	0.217224	12.6664	14.6732	22.5827	0.337676	1.90768	21.6237
297	0.330149	7.90513	0.657936	0.216519	12.6527	14.6619	22.5609	0.336663	1.90482	21.6008
298	0.329329	7.89711	0.658195	0.215811	12.6391	14.6508	22.5391	0.33565	1.90196	21.5778
299	0.328508	7.8891	0.658539	0.215101	12.6255	14.6396	22.5172	0.334638	1.89911	21.555
300	0.327685	7.88109	0.658964	0.214389	12.6119	14.6285	22.4954	0.333627	1.89627	21.5321
301	0.326861	7.87309	0.659468	0.213675	12.5983	14.6174	22.4734	0.332616	1.89342	21.5092
302	0.326035	7.86509	0.660046	0.212959	12.5848	14.6063	22.4515	0.331606	1.89058	21.4864
303	0.325197	7.8571	0.660695	0.212241	12.5712	14.5953	22.4295	0.330597	1.88775	21.4636
304	0.324347	7.84912	0.661413	0.211521	12.5577	14.5843	22.4075	0.329588	1.88491	21.4408
305	0.323487	7.84115	0.662195	0.210799	12.5442	14.5734	22.3855	0.32858	1.88208	21.418
306	0.322616	7.83318	0.663041	0.210076	12.5306	14.5625	22.3634	0.327573	1.87926	21.3953
307	0.321736	7.82522	0.663945	0.209351	12.5171	14.5517	22.3413	0.326566	1.87644	21.3726
308	0.320847	7.81726	0.664907	0.208625	12.5037	14.5409	22.3192	0.325561	1.87362	21.3499
309	0.31995	7.80932	0.665924	0.207897	12.4902	14.5301	22.2971	0.324555	1.87081	21.3272
310	0.319044	7.80138	0.666993	0.207167	12.4767	14.5194	22.275	0.323551	1.868	21.3045
311	0.318132	7.79344	0.668113	0.206436	12.4633	14.5087	22.2528	0.322547	1.86519	21.2819
312	0.317212	7.78551	0.669281	0.205704	12.4498	14.4981	22.2306	0.321544	1.86239	21.2592
313	0.316286	7.77759	0.670495	0.204971	12.4364	14.4876	22.2085	0.320541	1.85959	21.2366
314	0.315344	7.76968	0.671754	0.204226	12.423	14.4771	22.1863	0.31954	1.8568	21.214
315	0.314388	7.76177	0.673055	0.203471	12.4096	14.4667	22.164	0.318539	1.85401	21.1915
316	0.313419	7.75387	0.674397	0.202706	12.3962	14.4564	22.1418	0.317538	1.85122	21.1689
317	0.312438	7.74598	0.675778	0.201931	12.3829	14.4461	22.1196	0.316539	1.84844	21.1464
318	0.311446	7.73809	0.677197	0.201148	12.3695	14.4359	22.0973	0.31554	1.84566	21.1239
319	0.310443	7.73021	0.678652	0.200356	12.3562	14.4258	22.0751	0.314542	1.84288	21.1014
320	0.309431	7.72234	0.680142	0.199556	12.3428	14.4156	22.0528	0.313544	1.84011	21.0789
321	0.308409	7.71448	0.681666	0.198749	12.3295	14.4055	22.0306	0.312548	1.83734	21.0565
322	0.30738	7.70662	0.683221	0.197935	12.3162	14.3954	22.0083	0.311552	1.83458	21.0342
323	0.306343	7.69877	0.684808	0.197114	12.3029	14.3852	21.986	0.310557	1.83182	21.012
324	0.305298	7.69092	0.686424	0.196287	12.2897	14.3751	21.9637	0.309563	1.82906	20.9899
325	0.304248	7.68308	0.68807	0.195454	12.2764	14.3649	21.9415	0.308569	1.82631	20.968
326	0.303191	7.67525	0.689743	0.194615	12.2632	14.3548	21.9192	0.307576	1.82356	20.9462
327	0.302128	7.66743	0.691442	0.193771	12.2499	14.3447	21.8969	0.306584	1.82082	20.9245
328	0.301061	7.65961	0.693167	0.192922	12.2367	14.3346	21.8746	0.305593	1.81808	20.9029
329	0.299988	7.6518	0.694917	0.192068	12.2235	14.3245	21.8523	0.304602	1.81534	20.8814
330	0.298912	7.644	0.69669	0.19121	12.2103	14.3144	21.83	0.303612	1.8126	20.86
331	0.297831	7.6362	0.698487	0.190347	12.1971	14.3044	21.8078	0.302624	1.80987	20.8387
332	0.296747	7.62841	0.700305	0.189481	12.1839	14.2944	21.7855	0.301635	1.80715	20.8175
333	0.295659	7.62063	0.702145	0.188611	12.1708	14.2843	21.7632	0.300648	1.80442	20.7964
334	0.294568	7.61286	0.704006	0.187737	12.1576	14.2743	21.7409	0.299661	1.80171	20.7754
335	0.293474	7.60509	0.705886	0.18686	12.1445	14.2643	21.7187	0.298676	1.79899	20.7545
336	0.292377	7.59733	0.707785	0.18598	12.1314	14.2544	21.6964	0.297691	1.79628	20.7336
337	0.291278	7.58957	0.709703	0.185096	12.1183	14.2444	21.6741	0.296706	1.79357	20.7129
338	0.290177	7.58183	0.711639	0.184211	12.1052	14.2345	21.6519	0.295723	1.79087	20.6922
339	0.289074	7.57409	0.713592	0.183322	12.0921	14.2246	21.6296	0.29474	1.78817	20.6715
340	0.287969	7.56635	0.715562	0.182431	12.079	14.2147	21.6074	0.293759	1.78547	20.651
341	0.286862	7.55863	0.717547	0.181538	12.066	14.2049	21.5851	0.292778	1.78278	20.6305
342	0.285753	7.55091	0.719548	0.180642	12.0529	14.1951	21.5629	0.291798	1.78009	20.6101
343	0.284644	7.5432	0.721565	0.179875	12.0399	14.1853	21.5407	0.290818	1.7774	20.5898
344	0.283533	7.53549	0.723535	0.179229	12.0269	14.1755	21.5185	0.28984	1.77472	20.5695
345	0.282421	7.52779	0.725461	0.178693	12.0138	14.1658	21.4963	0.288862	1.77204	20.5492
346	0.281308	7.5201	0.727343	0.178262	12.0009	14.1561	21.4741	0.287886	1.76937	20.5291
347	0.280194	7.51242	0.729184	0.177927	11.9879	14.1464	21.4519	0.28691	1.7667	20.509
348	0.279079	7.50474	0.730985	0.177683	11.9749	14.1368	21.4297	0.285935	1.76403	20.4889
349	0.277963	7.49707	0.732746	0.177522	11.9619	14.1272	21.4075	0.28496	1.76137	20.4689
350	0.276847	7.48941	0.734469	0.17744	11.949	14.1177	21.3854	0.283987	1.75871	20.449
351	0.275731	7.48175	0.736156	0.177431	11.9361	14.1082	21.3632	0.283015	1.75605	20.4291
352	0.274614	7.4741	0.737806	0.17749	11.9231	14.0988	21.3411	0.282043	1.7534	20.4093
353	0.273497	7.46646	0.739423	0.177612	11.9102	14.0894	21.3189	0.281072	1.75075	20.3895
354	0.272379	7.45882	0.741006	0.177794	11.8973	14.0802	21.2968	0.280102	1.74811	20.3697
355	0.271261	7.45119	0.742556	0.17803	11.8844	14.071	21.2747	0.279133	1.74547	20.35
356	0.270144	7.44357	0.744075	0.178318	11.8716	14.0619	21.2526	0.278165	1.74283	20.3304
357	0.269026	7.43596	0.745564	0.178654	11.8587	14.0529	21.2305	0.277198	1.7402	20.3108
358	0.267908	7.42835	0.747023	0.179034	11.8459	14.044	21.2085	0.276231	1.73757	20.2912
359	0.26679	7.42075	0.748454	0.179456	11.833	14.0353	21.1864	0.275266	1.73494	20.2717
360	0.265672	7.41316	0.749856	0.179917	11.8202	14.0268	21.1644	0.274301	1.73232	20.2522
361	0.264554	7.40557	0.751232	0.180414	11.8074	14.0185	21.1423	0.273337	1.7297	20.2328
362	0.263437	7.39799	0.752582	0.180945	11.7946	33.2543	21.1203	0.272375	1.72709	20.2134
363	0.262319	7.39042	0.753906	0.181507	11.7818	33.2183	21.0983	0.271413	1.72448	20.1941
364	0.261202	7.38285	0.755206	0.182099	11.769	33.1824	21.0763	0.270452	1.72187	20.1748
365	0.260085	7.37529	0.756481	0.182717	11.7563	33.1465	21.0543	0.269491	1.71927	20.1555
366	0.258969	7.36774	0.757734	0.183361	11.7435	33.1106	21.0323	0.268532	1.71667	20.1362
367	0.257853	7.36019	0.758963	0.184029	11.7308	33.0748	21.0104	0.267574	1.71407	20.117
368	0.256737	7.35265	0.760171	0.184718	11.7181	33.0392	20.9884	0.266617	1.71148	20.0979
369	0.255621	7.34512	0.761357	0.185428	11.7054	33.0036	20.9665	0.26566	1.70889	20.0787
370	0.254506	7.33759	0.762523	0.186156	11.6927	32.9683	20.9446	0.264705	1.7063	20.0597
371	0.253392	7.33007	0.763668	0.186902	11.68	32.933	20.9227	0.26375	1.70372	20.0406
372	0.252278	7.32256	0.764794	0.187664	11.6673	32.8979	20.9008	0.262796	1.70114	20.0216
373	0.251164	7.31505	0.7659	0.188441	11.6546	32.863	20.8789	0.261843	1.69857	20.0026
374	0.250051	7.30755	0.766988	0.189232	11.642	32.8281	20.8571	0.260892	1.696	19.9836
375	0.248939	7.30005	0.768058	0.190036	11.6294	32.7934	20.8352	0.259941	1.69343	19.9647
376	0.247827	7.29256	0.769109	0.190852	11.6167	32.7588	20.8134	0.258991	1.69087	19.9458
377	0.246716	7.28508	0.770144	0.191678	11.6041	32.7243	20.7916	0.258042	1.68831	19.9269
378	0.245605	7.2776	0.771162	0.192515	11.5915	32.6899	20.7698	0.257219	1.68575	19.9081
379	0.244495	7.27014	0.772163	0.19336	11.5789	32.6556	20.748	0.256517	1.6832	19.8893
380	0.243386	7.26267	0.773148	0.194214	11.5664	32.6214	20.7263	0.255929	1.68065	19.8705
381	0.242277	7.25522	0.774117	0.195076	11.5538	32.5872	20.7045	0.255451	1.67811	19.8517
382	0.241169	7.24777	0.775072	0.195944	11.5412	32.5532	20.6828	0.255077	1.67557	19.833
383	0.240062	7.24033	0.776011	0.196819	11.5287	32.5193	20.661	0.254802	1.67303	19.8143
384	0.238955	7.23289	0.776936	0.1977	11.5162	32.4855	20.6393	0.254622	1.6705	19.7956
385	0.237849	7.22546	0.777846	0.198585	11.5037	32.4517	20.6176	0.254533	1.66797	19.777
386	0.236744	7.21804	0.778742	0.199475	11.4912	32.418	20.596	0.25453	1.66544	19.7584
387	0.235639	7.21062	0.779625	0.200369	11.4787	32.3845	20.5743	0.25461	1.66292	19.7398
388	0.234536	7.20321	0.780494	0.201267	11.4662	32.3509	20.5527	0.254768	1.6604	19.7212
389	0.233433	7.19581	0.781351	0.202168	11.4537	32.3175	20.531	0.255002	1.65788	19.7027
390	0.23233	7.18841	0.782194	0.203071	11.4413	32.2841	20.5094	0.255307	1.65537	19.6842
391	0.231229	7.18102	0.783025	0.203977	11.4289	32.2509	20.4878	0.255681	1.65286	19.6657
392	0.230128	7.17364	0.783844	0.204884	11.4164	32.2176	20.4663	0.256121	1.65036	19.6472
393	0.229028	7.16626	0.78465	0.205793	11.404	32.1845	20.4447	0.256623	1.64785	19.6288
394	0.227929	7.15889	0.785445	0.206703	11.3916	32.1514	20.4231	0.257185	1.64536	19.6104
395	0.226831	7.15153	0.786228	0.207614	11.3792	32.1184	20.4016	0.257804	1.64286	19.592
396	0.225734	7.14417	0.787	0.208526	11.3668	32.0854	20.3801	0.258478	1.64037	19.5736
397	0.224637	7.13682	0.787761	0.209438	11.3545	32.0525	20.3586	0.259204	1.63789	19.5553
398	0.223541	7.12948	0.788511	0.210349	11.3421	32.0197	20.3371	0.259981	1.6354	19.537
399	0.222446	7.12214	0.78925	0.211261	11.3298	31.9869	20.3157	0.260805	1.63292	19.5187
400	0.221352	7.11481	0.789978	0.212172	11.3175	31.9542	20.2942	0.261675	1.63045	19.5004
401	0.220259	7.10749	0.790696	0.213082	11.3051	31.9215	20.2728	0.262555	1.62798	19.4822
402	0.219167	7.10017	0.791404	0.213991	11.2928	31.8889	20.2514	0.263444	1.62551	19.464
403	0.218075	7.09286	0.792102	0.214899	11.2805	31.8564	20.23	0.26434	1.62304	19.4457
404	0.216985	7.08556	0.79279	0.215806	11.2683	31.8239	20.2086	0.265244	1.62058	19.4276
405	0.215895	7.07826	0.793468	0.216711	11.256	31.7914	20.1872	0.266155	1.61812	19.4094
406	0.214806	7.07097	0.794137	0.217614	11.2437	31.759	20.1659	0.267072	1.61567	19.3913
407	0.213718	7.06369	0.794796	0.218516	11.2315	31.7267	20.1445	0.267994	1.61322	19.3731
408	0.212631	7.05641	0.795446	0.219415	11.2193	31.6944	20.1232	0.268921	1.61077	19.355
409	0.211545	7.04914	0.796087	0.220312	11.207	31.6621	20.1019	0.269852	1.60833	19.337
410	0.21046	7.04187	0.796719	0.221207	11.1948	31.6299	20.0807	0.270788	1.60589	19.3189
411	0.209376	7.03462	0.797342	0.222099	11.1826	31.5978	20.0594	0.271727	1.60345	19.3009
412	0.208292	7.02737	0.797957	0.222989	11.1704	31.5657	20.0381	0.272668	1.60102	19.2829
413	0.20721	7.02012	0.798563	0.223876	11.1583	31.5336	20.0169	0.273613	1.59859	19.2649
414	0.206128	7.01289	0.79916	0.22476	11.1461	31.5016	19.9957	0.274559	1.59616	19.2469
415	0.205048	7.00565	0.799749	0.225641	11.134	31.4696	19.9745	0.275508	1.59374	19.2289
416	0.203968	6.99843	0.80033	0.22652	11.1218	31.4377	19.9533	0.276458	1.59132	19.211
417	0.202889	6.99121	0.800903	0.227395	11.1097	31.4058	19.9322	0.277409	1.58891	19.1931
418	0.201812	6.984	0.801468	0.228267	11.0976	31.374	19.911	0.278361	1.5865	19.1752
419	0.200735	6.9768	0.802025	0.229135	11.0855	31.3422	19.8899	0.279313	1.58409	19.1573
420	0.199659	6.9696	0.802574	0.230001	11.0734	31.3105	19.8688	0.280265	1.58169	19.1394
421	0.198584	6.96241	0.803115	0.230863	11.0613	31.2787	19.8478	0.281218	1.57929	19.1216
422	0.19751	6.95523	0.803648	0.231721	11.0492	31.2471	19.827	0.28217	1.57689	19.1038
423	0.196437	6.94805	0.804175	0.232576	11.0372	31.2154	19.8062	0.283122	1.5745	19.086
424	0.195365	6.94088	0.804693	0.233427	11.0251	31.1839	19.7856	0.284073	1.57211	19.0682
425	0.194294	6.93371	0.805205	0.234274	11.0131	31.1523	19.7651	0.285024	1.56972	19.0504
426	0.193224	6.92667	0.805709	0.235118	11.0011	31.1208	19.7447	0.285973	1.56734	19.0327
427	0.192155	6.91975	0.806205	0.235958	10.9891	31.0893	19.7244	0.28692	1.56496	19.0149
428	0.191087	6.91293	0.806695	0.236794	10.9771	31.0579	19.7043	0.287867	1.56258	18.9972
429	0.19002	6.90622	0.807178	0.237591	10.9651	31.0265	19.6842	0.288811	1.56021	18.9795
430	0.188954	6.8996	0.807653	0.238353	10.9531	30.9951	19.6642	0.289754	1.55784	18.9618
431	0.187888	6.89308	0.808122	0.239079	10.9412	30.9638	19.6443	0.290694	1.55548	18.9442
432	0.186824	6.88664	0.808584	0.239773	10.9292	30.9325	19.6245	0.291633	1.55312	18.9265
433	0.185761	6.88028	0.80904	0.240436	10.9173	30.9012	19.6047	0.292569	1.55076	18.9089
434	0.184699	6.874	0.809488	0.24107	10.9053	30.87	19.5851	0.293503	1.54841	18.8913
435	0.183638	6.86779	0.80993	0.241675	10.8934	30.8388	19.5655	0.294434	1.54605	18.8737
436	0.182578	6.86165	0.810365	0.242253	10.8815	30.8077	19.546	0.295363	1.54371	18.8561
437	0.181519	6.85557	0.810794	0.242805	10.8696	30.7766	19.5266	0.296289	1.54136	18.8385
438	0.180461	6.84956	0.811217	0.243333	10.8578	30.7455	19.5073	0.297212	1.53902	18.821
439	0.179404	6.8436	0.811595	0.243838	10.8459	30.7144	19.488	0.298132	1.53669	18.8035
440	0.178348	6.8377	0.811931	0.244321	10.834	30.6834	19.4688	0.299049	1.53435	18.786
441	0.177293	6.83184	0.812227	0.244783	10.8222	30.6524	19.4496	0.299963	1.53203	18.7685
442	0.176239	6.82604	0.812484	0.245224	10.8104	30.6215	19.4305	0.300873	1.5297	18.751
443	0.175186	6.82028	0.812703	0.245646	10.7985	30.5906	19.4115	0.301781	1.52738	18.7335
444	0.174134	6.81457	0.812887	0.24605	10.7867	30.5597	19.3926	0.302685	1.52506	18.7161
445	0.173083	6.8089	0.813037	0.246436	10.7749	30.5289	19.3737	0.303585	1.52274	18.6986
446	0.172033	6.80327	0.813153	0.246805	10.7632	30.498	19.3548	0.304482	1.52043	18.6812
447	0.170985	6.79767	0.813238	0.247157	10.7514	30.4673	19.336	0.305375	1.51812	18.6638
448	0.169937	6.79211	0.813292	0.247495	10.7396	30.4365	19.3173	0.306265	1.51582	18.6464
449	0.16889	6.78659	0.813317	0.247817	10.7279	30.4058	19.2986	0.307151	1.51352	18.6291
450	0.167845	6.78109	0.813314	0.248125	10.7161	30.3751	19.28	0.308033	1.51122	18.6117
451	0.1668	6.77563	0.813284	0.24842	10.7044	30.3444	19.2614	0.308912	1.50892	18.5944
452	0.165757	6.77019	0.813228	0.248701	10.6927	30.3138	19.2428	0.309786	1.50663	18.577
453	0.164714	6.76479	0.813148	0.248969	10.681	30.2832	19.2243	0.310657	1.50435	18.5597
454	0.163673	6.7594	0.813043	0.249226	10.6693	30.2527	19.2059	0.311524	1.50206	18.5424
455	0.162632	6.75405	0.812915	0.24947	10.6576	30.2221	19.1875	0.312386	1.49978	18.5251
456	0.161593	6.74871	0.812765	0.249704	10.6459	30.1916	19.1691	0.313245	1.49751	18.5079
457	0.160555	6.7434	0.812593	0.249926	10.6343	30.1611	19.1508	0.3141	1.49523	18.4906
458	0.159518	6.73811	0.812401	0.250139	10.6226	30.1307	19.1326	0.31495	1.49296	18.4734
459	0.158482	6.73284	0.81219	0.250315	10.611	30.1003	19.1143	0.315796	1.4907	18.4562
460	0.157447	6.72759	0.811959	0.250459	10.5994	30.0699	19.0961	0.316639	1.48843	18.439
461	0.156413	6.72235	0.811709	0.250572	10.5878	30.0396	19.078	0.317477	1.48617	18.4218
462	0.15538	6.71714	0.811442	0.250656	10.5762	30.0092	19.0599	0.318311	1.48392	18.4046
463	0.154349	6.71194	0.811158	0.250712	10.5646	29.9789	19.0418	0.31914	1.48167	18.3874
464	0.153318	6.70676	0.810858	0.250742	10.553	29.9487	19.0238	0.319966	1.47942	18.3703
465	0.152289	6.70159	0.810541	0.250748	10.5415	29.9184	19.0058	0.320787	1.47717	18.3532
466	0.15126	6.69644	0.81021	0.250731	10.5299	29.8882	18.9878	0.321604	1.47493	18.336
467	0.150233	6.6913	0.809863	0.250693	10.5184	29.858	18.9699	0.322416	1.47269	18.3189
468	0.149207	6.68617	0.809502	0.250634	10.5068	29.8279	18.952	0.323224	1.47046	18.3018
469	0.148182	6.68106	0.809128	0.250555	10.4953	29.7978	18.9341	0.324028	1.46822	18.2848
470	0.147158	6.67596	0.80874	0.250459	10.4838	29.7677	18.9163	0.324827	1.466	18.2677
471	0.146135	6.67087	0.808339	0.250345	10.4723	29.7376	18.8985	0.325622	1.46377	18.2506
472	0.145113	6.66579	0.807926	0.250216	10.4608	29.7075	18.8808	0.326413	1.46155	18.2336
473	0.144093	6.66072	0.8075	0.25007	10.4494	29.6775	18.863	0.327199	1.45933	18.2166
474	0.143073	6.65566	0.807064	0.249911	10.4379	29.6476	18.8453	0.327981	1.45712	18.1996
475	0.142055	6.65061	0.806615	0.249737	10.4265	29.6176	18.8277	0.328759	1.45491	18.1826
476	0.141037	6.64557	0.806156	0.249551	10.415	29.5877	18.81	0.329532	1.4527	18.1656
477	0.140021	6.64054	0.805687	0.249352	10.4036	29.5578	18.7924	0.3303	1.4505	18.1486
478	0.139006	6.63552	0.805207	0.249141	10.3922	29.5279	18.7748	0.331064	1.4483	18.1317
479	0.137992	6.63051	0.804718	0.24892	10.3808	29.498	18.7573	0.331824	1.4461	18.1147
480	0.136979	6.6255	0.804218	0.248687	10.3694	29.4682	18.7398	0.332579	1.4439	18.0978
481	0.135968	6.6205	0.80371	0.248445	10.358	29.4384	18.7223	0.33333	1.44171	18.0809
482	0.134957	6.61551	0.803193	0.248193	10.3466	29.4087	18.7048	0.334076	1.43953	18.064
483	0.133948	6.61061	0.802666	0.247932	10.3353	29.3789	18.6874	0.334818	1.43734	18.0471
484	0.13294	6.60579	0.802132	0.247662	10.3239	29.3492	18.6699	0.335555	1.43516	18.0302
485	0.131933	6.60105	0.801589	0.247384	10.3126	29.3195	18.6526	0.336288	1.43299	18.0133
486	0.130927	6.59638	0.801038	0.247098	10.3013	29.2899	18.6352	0.337017	1.43082	17.9965
487	0.129922	6.59179	0.80048	0.246805	10.29	29.2602	18.6179	0.337741	1.42865	17.9796
488	0.128918	6.58726	0.799914	0.246504	10.2787	29.2306	18.6006	0.33846	1.42648	17.9628
489	0.127916	6.58279	0.799341	0.246196	10.2674	29.201	18.5833	0.339175	1.42432	17.946
490	0.126914	6.57838	0.798761	0.245882	10.2561	29.1715	18.566	0.339886	1.42216	17.9292
491	0.125914	6.57402	0.798174	0.245562	10.2448	29.142	18.5488	0.340592	1.42	17.9124
492	0.124915	6.56972	0.79758	0.245235	10.2336	29.1125	18.5316	0.341293	1.41785	17.8956
493	0.123917	6.56547	0.79698	0.244903	10.2223	29.083	18.5144	0.34199	1.4157	17.8789
494	0.122921	6.56126	0.796373	0.244565	10.2111	29.0535	18.4972	0.342683	1.41355	17.8621
495	0.121925	6.55709	0.795761	0.244222	10.1999	29.0241	18.4801	0.343371	1.41141	17.8454
496	0.120931	6.55297	0.795142	0.243873	10.1887	28.9947	18.463	0.344055	1.40927	17.8287
497	0.119938	6.54889	0.794517	0.24352	10.1775	28.9653	18.4459	0.344734	1.40714	17.8119
498	0.118946	6.54484	0.793887	0.243162	10.1663	28.936	18.4288	0.345409	1.405	17.7952
499	0.117955	6.54083	0.793252	0.242799	10.1551	28.9067	18.4118	0.34608	1.40288	17.7786
500	0.116965	6.53685	0.792611	0.242432	10.1439	28.8774	18.3947	0.346746	1.40075	17.7619
501	0.115977	6.5329	0.791964	0.242061	10.1328	28.8481	18.3777	0.347407	1.39863	17.7452
502	0.114989	6.52898	0.791313	0.241685	10.1216	28.8189	18.3607	0.348064	1.39651	17.7286
503	0.114003	6.52509	0.790657	0.241306	10.1105	28.7896	18.3438	0.348717	1.39439	17.7119
504	0.113018	6.52122	0.789996	0.240922	10.0994	28.7604	18.3268	0.349365	1.39228	17.6953
505	0.112035	6.51738	0.78933	0.240535	10.0883	28.7313	18.3099	0.350009	1.39017	17.6787
506	0.111052	6.51357	0.788659	0.240145	10.0772	28.7021	18.293	0.350649	1.38807	17.6621
507	0.110071	6.50978	0.787984	0.239751	10.0661	28.673	18.2761	0.351284	1.38597	17.6455
508	0.10909	6.50601	0.787305	0.239353	10.055	28.6439	18.2593	0.351914	1.38387	17.6289
509	0.108112	6.50226	0.786621	0.238952	10.0439	28.6148	18.2425	0.352541	1.38177	17.6123
510	0.107134	6.49853	0.785933	0.238549	10.0329	28.5858	18.2256	0.353163	1.37968	17.5958
511	0.106157	6.49482	0.785241	0.238142	10.0218	28.5568	18.2088	0.35378	1.37759	17.5792
512	0.105182	6.49112	0.784545	0.237732	10.0108	28.5278	18.1921	0.354393	1.37551	17.5627
513	0.104208	6.48745	0.783846	0.237319	9.99978	28.4988	18.1753	0.355002	1.37343	17.5462
514	0.103235	6.48379	0.783142	0.236903	9.98877	28.4699	18.1586	0.355607	1.37135	17.5297
515	0.102263	6.48014	0.782434	0.236484	9.97778	28.4409	18.1418	0.356207	1.36927	17.5132
516	0.101293	6.47651	0.781723	0.236063	9.96679	28.412	18.1251	0.356803	1.3672	17.4967
517	0.100323	6.4729	0.781009	0.235639	9.95581	28.3832	18.1085	0.357394	1.36513	17.4802
518	0.0993553	6.46929	0.780291	0.235213	9.94484	28.3543	18.0918	0.357982	1.36307	17.4638
519	0.0983885	6.4657	0.779569	0.234784	9.93389	28.3255	18.0752	0.358565	1.36101	17.4473
520	0.0974229	6.46212	0.778844	0.234352	9.92295	28.2967	18.0585	0.359143	1.35895	17.4309
521	0.0964585	6.45856	0.778116	0.233918	9.91201	28.2679	18.0419	0.359718	1.35689	17.4144
522	0.0954953	6.455	0.777384	0.233482	9.90109	28.2392	18.0253	0.360288	1.35484	17.398
523	0.0945334	6.45145	0.77665	0.233044	9.89018	28.2104	18.0088	0.360854	1.35279	17.3816
524	0.0935727	6.44792	0.775912	0.232603	9.87928	28.1817	17.9922	0.361415	1.35075	17.3652
525	0.0926133	6.44439	0.775172	0.23216	9.86839	28.1531	17.9757	0.361972	1.34871	17.3489
526	0.091655	6.44087	0.774428	0.231715	9.85751	28.1244	17.9592	0.362526	1.34667	17.3325
527	0.0906981	6.43736	0.773681	0.231268	9.84665	28.0958	17.9427	0.363075	1.34463	17.3161
528	0.0897423	6.43386	0.772932	0.230819	9.83579	28.0672	17.9262	0.363619	1.3426	17.2998
529	0.0887878	6.43037	0.77218	0.230368	9.82494	28.0386	17.9097	0.36416	1.34057	17.2834
530	0.0878346	6.42689	0.771425	0.229915	9.81411	28.01	17.8933	0.364696	1.33855	17.2671
531	0.0868825	6.42341	0.770667	0.22946	9.80329	27.9815	17.8768	0.365228	1.33653	17.2508
532	0.0859318	6.41994	0.769907	0.229003	9.79247	27.953	17.8604	0.365756	1.33451	17.2345
533	0.0849823	6.41647	0.769144	0.228544	9.78167	27.9245	17.844	0.36628	1.33249	17.2182
534	0.084034	6.41301	0.768379	0.228083	9.77088	27.896	17.8276	0.3668	1.33048	17.2019
535	0.083087	6.40956	0.767611	0.227621	9.7601	27.8676	17.8113	0.367315	1.32847	17.1857
536	0.0821413	6.40611	0.766822	0.227156	9.74933	27.8392	17.7949	0.367827	1.32647	17.1694
537	0.0811968	6.40267	0.766012	0.22669	9.73857	27.8108	17.7786	0.368334	1.32447	17.1531
538	0.0802536	6.39923	0.765184	0.226222	9.72783	27.7824	17.7623	0.368837	1.32247	17.1369
539	0.0793116	6.3958	0.764336	0.225753	9.71709	27.7541	17.7459	0.369336	1.32047	17.1207
540	0.078371	6.39237	0.763471	0.225282	9.70636	27.7257	17.7297	0.369831	1.31848	17.1045
541	0.0774315	6.38895	0.762589	0.224809	9.69565	27.6974	17.7134	0.370322	1.31649	17.0883
542	0.0764934	6.38553	0.761691	0.224334	9.68494	27.6692	17.6971	0.370809	1.31451	17.0721
543	0.0755565	6.38212	0.760777	0.223858	9.67425	27.6409	17.6809	0.371292	1.31253	17.0559
544	0.0746209	6.3787	0.759849	0.22338	9.66357	27.6127	17.6647	0.371771	1.31054	17.0397
545	0.0736866	6.3753	0.758907	0.222901	9.6529	27.5845	17.6485	0.372246	1.30855	17.0236
546	0.0727536	6.37189	0.757951	0.22242	9.64224	27.5563	17.6323	0.372716	1.30655	17.0074
547	0.0718218	6.36849	0.756982	0.221938	9.63158	27.5281	17.6161	0.373183	1.30455	16.9913
548	0.0708913	6.36509	0.756001	0.221454	9.62095	27.5	17.5999	0.373646	1.30255	16.9751
549	0.0699621	6.3617	0.755008	0.220969	9.61032	27.4719	17.5838	0.374105	1.30054	16.959
550	0.0690342	6.3583	0.754004	0.220482	9.5997	27.4438	17.5677	0.37456	1.29853	16.9429
551	0.0681076	6.35491	0.752989	0.219994	9.58909	27.4157	17.5515	0.375011	1.29651	16.9268
552	0.0671823	6.35152	0.751964	0.219505	9.57849	27.3877	17.5354	0.375457	1.2945	16.9107
553	0.0662582	6.34814	0.751052	0.219014	9.56791	27.3597	17.5193	0.375901	1.29247	16.8946
554	0.0653355	6.34476	0.750246	0.218521	9.55733	27.3317	17.5033	0.37634	1.29045	16.8786
555	0.0644141	6.34137	0.749539	0.218028	9.54677	27.3037	17.4872	0.376775	1.28842	16.8625
556	0.0634939	6.33799	0.748926	0.217533	9.53621	27.2758	17.4712	0.377206	1.28639	16.8465
557	0.0625751	6.33462	0.748399	0.217036	9.52567	27.2478	17.4551	0.377634	1.28436	16.8305
558	0.0616576	6.33124	0.747954	0.216538	9.51514	27.2199	17.4391	0.378057	1.28233	16.8144
559	0.0607413	6.32787	0.747585	0.216039	9.50461	27.192	17.4231	0.378477	1.28029	16.7984
560	0.0598264	6.32449	0.747288	0.215539	9.4941	27.1642	17.4071	0.378893	1.27825	16.7824
561	0.0589128	6.32112	0.747058	0.215038	9.4836	27.1363	17.3912	0.379305	1.27621	16.7664
562	0.0580005	6.31775	0.746891	0.214535	9.47311	27.1085	17.3752	0.379713	1.27417	16.7504
563	0.0570895	6.31438	0.746782	0.214031	9.46263	27.0807	17.3592	0.380118	1.27212	16.7345
564	0.0561799	6.31101	0.746729	0.213525	9.45216	27.053	17.3433	0.380518	1.27007	16.7185
565	0.0552715	6.30764	0.746727	0.213019	9.4417	27.0252	17.3274	0.380915	1.26803	16.7026
566	0.0543645	6.30428	0.746774	0.212511	9.43126	26.9975	17.3115	0.381308	1.26598	16.6866
567	0.0534588	6.30091	0.746866	0.212002	9.42082	26.9698	17.2956	0.381698	1.26392	16.6707
568	0.0525544	6.29755	0.747001	0.211492	9.41039	26.9421	17.2797	0.382083	1.26187	16.6549
569	0.0516513	6.29418	0.747176	0.210981	9.39997	26.9145	17.2639	0.382465	1.25982	16.6391
570	0.0507496	6.29082	0.747389	0.210468	9.38957	26.8868	17.248	0.382843	1.25776	16.6235
571	0.0498492	6.28745	0.747636	0.209955	9.37917	26.8592	17.2322	0.383218	1.25569	16.6079
572	0.0489501	6.28409	0.747916	0.20944	9.36879	26.8316	17.2163	0.383588	1.25361	16.5924
573	0.0480524	6.28073	0.748228	0.208924	9.35841	26.8041	17.2005	0.383955	1.25153	16.577
574	0.047156	6.27736	0.748568	0.208407	9.34805	26.7765	17.1847	0.384319	1.24945	16.5617
575	0.0462609	6.274	0.748935	0.207889	9.3377	26.749	17.1689	0.384678	1.24736	16.5465
576	0.0453672	6.27064	0.749327	0.20737	9.32735	26.7215	17.1532	0.385035	1.24526	16.5313
577	0.0444748	6.26728	0.749743	0.20685	9.31702	26.694	17.1374	0.385387	1.24316	16.5163
578	0.0435838	6.26391	0.750181	0.206329	9.3067	26.6666	17.1217	0.385736	1.24105	16.5013
579	0.0426941	6.26055	0.75064	0.205807	9.29639	26.6391	17.1059	0.386081	1.23894	16.4863
580	0.0418058	6.25719	0.751118	0.205283	9.28609	26.6117	17.0902	0.386423	1.23683	16.4715
581	0.0409188	6.25383	0.751615	0.204759	9.2758	26.5843	17.0745	0.386761	1.23471	16.4567
582	0.0400331	6.25046	0.752128	0.204234	9.26552	26.557	17.0588	0.387095	1.23259	16.442
583	0.0391488	6.2471	0.752657	0.203707	9.25525	26.5296	17.0431	0.387426	1.23047	16.4273
584	0.0382659	6.24374	0.7532	0.20318	9.24499	26.5023	17.0275	0.387753	1.22834	16.4127
585	0.0373843	6.24037	0.753758	0.202651	9.23474	26.475	17.0118	0.388077	1.22621	16.3982
586	0.0365041	6.23701	0.754328	0.202122	9.2245	26.4477	16.9962	0.388398	1.22408	16.3838
587	0.0356252	6.23365	0.754909	0.201592	9.21427	26.4205	16.9805	0.388714	1.22194	16.3694
588	0.0347477	6.23028	0.755502	0.201061	9.20405	26.3932	16.9649	0.389028	1.2198	16.3551
589	0.0338716	6.22691	0.756105	0.200528	9.19384	26.366	16.9493	0.389337	1.21766	16.3408
590	0.0329968	6.22355	0.756717	0.199995	9.18365	26.3388	16.9337	0.389644	1.21552	16.3266
591	0.0321234	6.22018	0.757338	0.199461	9.17346	26.3117	16.9181	0.389947	1.21338	16.3125
592	0.0312514	6.21682	0.757966	0.198926	9.16328	26.2845	16.9025	0.390246	1.21122	16.2984
593	0.0303808	6.21345	0.758696	0.198391	9.15312	26.2574	16.887	0.390542	1.20907	16.2844
594	0.0295115	6.21008	0.759519	0.197854	9.14296	26.2303	16.8714	0.390835	1.20691	16.2704
595	0.0286436	6.20671	0.760429	0.197303	9.13282	26.2032	16.8559	0.391124	1.20474	16.2565
596	0.027777	6.20334	0.76142	0.19674	9.12268	26.1762	16.8404	0.39141	1.20257	16.2426
597	0.0269119	6.19997	0.762487	0.196164	9.11256	26.1491	16.8249	0.391692	1.2004	16.2289
598	0.0260481	6.1966	0.763624	0.195577	9.10244	26.1221	16.8093	0.391971	1.19822	16.2151
599	0.0251857	6.19323	0.764827	0.194978	9.09234	26.0951	16.7939	0.392247	1.19604	16.2015
600	0.0243247	6.18985	0.766092	0.194369	9.08224	26.0682	16.7784	0.392519	1.19386	16.1879
601	0.0234651	6.18648	0.767413	0.193749	9.07216	26.0412	16.7629	0.392788	1.19168	16.1743
602	0.0226069	6.1831	0.768788	0.19312	9.06208	26.0143	16.7475	0.393054	1.18949	16.1608
603	0.02175	6.17973	0.770212	0.192483	9.05202	25.9874	16.732	0.393316	1.1873	16.1474
604	0.0208946	6.17635	0.771683	0.191836	9.04197	25.9605	16.7166	0.393575	1.18511	16.134
605	0.0200406	6.17297	0.773198	0.191181	9.03205	25.9337	16.7012	0.393831	1.18292	16.1207
606	0.0191879	6.1696	0.774753	0.190519	9.02227	25.9068	16.6858	0.394084	1.18073	16.1074
607	0.0183366	6.16622	0.776346	0.189849	9.01262	25.88	16.6704	0.394333	1.17854	16.0942
608	0.0174868	6.16283	0.777974	0.189172	9.00309	25.8532	16.655	0.394579	1.17634	16.081
609	0.0166383	6.15945	0.779636	0.188488	8.99367	25.8264	16.6396	0.394822	1.17415	16.0679
610	0.0157913	6.15607	0.781328	0.187798	8.98437	25.7997	16.6242	0.395061	1.17195	16.0549
611	0.0149456	6.15269	0.78305	0.187102	8.97517	25.773	16.6089	0.395298	1.16976	16.0419
612	0.0141014	6.1493	0.784798	0.1864	8.96607	25.7463	16.5935	0.395531	1.16756	16.029
613	0.0132585	6.14591	0.786572	0.185693	8.95708	25.7196	16.5782	0.395761	1.16537	16.0162
614	0.0124171	6.14253	0.788369	0.18498	8.94817	25.6929	16.5629	0.395987	1.16317	16.0034
615	0.0115771	6.13914	0.790188	0.184263	8.93935	25.6663	16.5476	0.396211	1.16097	15.9907
616	0.0107385	6.13575	0.792028	0.18354	8.93062	25.6396	16.5323	0.396432	1.15878	15.978
617	0.00990133	6.13236	0.793887	0.182814	8.92198	25.613	16.517	0.396649	1.15658	15.9655
618	0.00906556	6.12897	0.795764	0.182083	8.91341	25.5865	16.5017	0.396863	1.15439	15.953
619	0.00823121	6.12557	0.797658	0.181347	8.90491	25.5599	16.4865	0.397074	1.1522	15.9407
620	0.00739828	6.12218	0.799566	0.180608	8.89649	25.5334	16.4712	0.397282	1.15	15.9285
621	0.00656677	6.11878	0.80149	0.179866	8.88814	25.5068	16.456	0.397487	1.14781	15.9164
622	0.00573669	6.11538	0.803426	0.179119	8.87985	25.4804	16.4407	0.397689	1.14562	15.9044
623	0.00490804	6.11199	0.805376	0.17837	8.87163	25.4539	16.4255	0.397888	1.14343	15.8926
624	0.00408081	6.10859	0.807336	0.177617	8.86347	25.4274	16.4103	0.398084	1.14124	15.8809
625	0.00325501	6.10518	0.809307	0.176861	8.85537	25.401	16.3951	0.398277	1.13905	15.8693
626	0.00243064	6.10178	0.811288	0.176103	8.84732	25.3746	16.3799	0.398466	1.13686	15.8579
627	0.0016077	6.09838	0.813279	0.175341	8.83933	25.3482	16.3647	0.398653	1.13468	15.8466
628	0.000786194	6.09497	0.815277	0.174577	8.8314	25.3218	16.3496	0.398837	1.13249	15.8355
629	-3.38736e-05	6.09157	0.817283	0.173811	8.82351	25.2955	16.3346	0.399018	1.13031	15.8247
630	-0.000852504	6.08816	0.819234	0.173042	8.81567	25.2692	16.3197	0.399195	1.12813	15.814
631	-0.0016697	6.08475	0.821133	0.17227	8.80788	25.2429	16.3048	0.39937	1.12595	15.8037
632	-0.00248545	6.08134	0.822982	0.171497	8.80014	25.2166	16.2901	0.399542	1.12377	43.8943
633	-0.00329975	6.07793	0.824784	0.170722	8.79243	25.1903	16.2754	0.399711	1.12159	43.8472
634	-0.00411262	6.07451	0.826542	0.169944	8.78477	25.1641	16.2608	0.399877	1.11942	43.8001
635	-0.00492404	6.0711	0.828256	0.169165	8.77716	25.1379	16.2462	0.40004	1.11724	43.7531
636	-0.00573401	6.06768	0.82993	0.168384	8.76958	25.1117	16.2318	0.4002	1.11507	43.7061
637	-0.00654253	6.06426	0.831565	0.167602	8.76203	25.0855	16.2174	0.400358	1.1129	43.6591
638	-0.0073496	6.06084	0.833163	0.166818	8.75453	25.0594	16.203	0.400512	1.11073	43.6124
639	-0.00815522	6.05742	0.834726	0.166032	8.74706	25.0332	16.1888	0.400664	1.10856	43.5659
640	-0.00895939	6.054	0.836256	0.165245	8.73962	25.0071	16.1746	0.400812	1.1064	43.5196
641	-0.0097621	6.05058	0.837753	0.164456	8.73222	24.981	16.1605	0.400958	1.10424	43.4735
642	-0.0105633	6.04715	0.83922	0.163667	8.72485	24.955	16.1464	0.401101	1.10208	43.4275
643	-0.0113631	6.04373	0.840658	0.162876	8.7175	24.9289	16.1324	0.401241	1.09992	43.3818
644	-0.0121615	6.0403	0.842068	0.162084	8.71019	24.9029	16.1185	0.401379	1.09776	43.3362
645	-0.0129583	6.03687	0.843451	0.161291	8.70291	24.8769	16.1046	0.401514	1.09561	43.2908
646	-0.0137538	6.03344	0.844809	0.160496	8.69566	24.8509	16.0908	0.401645	1.09345	43.2455
647	-0.0145477	6.03	0.846143	0.159701	8.68843	24.8249	16.0771	0.401775	1.0913	43.2003
648	-0.0153402	6.02657	0.847452	0.158905	8.68123	24.799	16.0634	0.401901	1.08915	43.1552
649	-0.0161312	6.02314	0.84874	0.158108	8.67401	24.7731	16.0498	0.402025	1.08701	43.1101
650	-0.0169207	6.0197	0.850005	0.15731	8.66678	24.7472	16.0362	0.402145	1.08486	43.0652
651	-0.0177088	6.01626	0.85125	0.156512	8.65954	24.7213	16.0227	0.402264	1.08272	43.0204
652	-0.0184954	6.01282	0.852475	0.155712	8.65229	24.6954	16.0092	0.402379	1.08058	42.9756
653	-0.0192805	6.00938	0.853681	0.154912	8.64503	24.6696	15.9959	0.402492	1.07844	42.931
654	-0.0200641	6.00594	0.854868	0.154112	8.63776	24.6438	15.9825	0.402602	1.07631	42.8864
655	-0.0208463	6.00249	0.856038	0.15331	8.63048	24.618	15.9693	0.402709	1.07417	42.8419
656	-0.021627	5.99904	0.85719	0.152508	8.62319	24.5922	15.9561	0.402814	1.07204	42.7975
657	-0.0224062	5.9956	0.858326	0.151706	8.61589	24.5665	15.9429	0.402916	1.06991	42.7532
658	-0.0231839	5.99215	0.859445	0.150903	8.60859	24.5407	15.9299	0.403016	1.06779	42.7089
659	-0.0239602	5.9887	0.860549	0.1501	8.60128	24.515	15.9168	0.403113	1.06566	42.6647
660	-0.0247349	5.98525	0.861638	0.149296	8.59404	24.4893	15.9039	0.403207	1.06354	42.6206
661	-0.0255082	5.98179	0.862713	0.148492	8.58689	24.4637	15.891	0.403299	1.06142	42.5765
662	-0.02628	5.97834	0.863773	0.147688	8.5798	24.438	15.8781	0.403388	1.0593	42.5325
663	-0.0270503	5.97488	0.86482	0.146883	8.57279	24.4124	15.8654	0.403474	1.05719	42.4885
664	-0.0278191	5.97142	0.865853	0.146078	8.56583	24.3868	15.8527	0.403534	1.05508	42.4445
665	-0.0285864	5.96796	0.866874	0.145273	8.55894	24.3612	15.84	0.403567	1.05297	42.4005
666	-0.0293522	5.9645	0.867881	0.144467	8.5521	24.3356	15.8274	0.403574	1.05086	42.3566
667	-0.0301165	5.96104	0.868877	0.143661	8.54531	24.3101	15.8149	0.403557	1.04875	42.3127
668	-0.0308793	5.95757	0.869861	0.142855	8.53857	24.2846	15.8025	0.403516	1.04665	42.2689
669	-0.0316406	5.95411	0.870833	0.142049	8.53188	24.2591	15.7901	0.403452	1.04455	42.225
670	-0.0324005	5.95064	0.871793	0.141243	8.52523	24.2336	15.7778	0.403366	1.04245	42.1812
671	-0.0331588	5.94717	0.872743	0.140436	8.51862	24.2081	15.7656	0.403258	1.04036	42.1375
672	-0.0339156	5.9437	0.873682	0.13963	8.51205	24.1827	15.7535	0.403129	1.03827	42.0937
673	-0.0346709	5.94023	0.87461	0.138823	8.50552	24.1573	15.7414	0.402979	1.03618	42.05
674	-0.0354247	5.93675	0.875528	0.138016	8.49902	24.1319	15.7294	0.40281	1.03409	42.0064
675	-0.036177	5.93328	0.876436	0.13721	8.49256	24.1065	15.7176	0.402622	1.032	41.9628
676	-0.0369278	5.9298	0.877334	0.136403	8.48612	24.0811	15.7058	0.402415	1.02992	41.9192
677	-0.0376771	5.92632	0.878222	0.135596	8.47972	24.0558	15.6941	0.40219	1.02784	41.8756
678	-0.0384249	5.92284	0.879101	0.134789	8.47334	24.0305	15.6825	0.401948	1.02576	41.8321
679	-0.0391711	5.91936	0.87997	0.133983	8.46699	24.0052	15.671	0.401688	1.02368	41.7886
680	-0.0399159	5.91588	0.88083	0.133176	8.46066	23.9799	15.6597	0.401413	1.02161	41.7452
681	-0.0406591	5.9124	0.881681	0.132369	8.45436	23.9546	15.6485	0.401121	1.01954	41.7018
682	-0.0414008	5.90891	0.882523	0.131563	8.44808	23.9294	15.6374	0.400815	1.01747	41.6584
683	-0.042141	5.90542	0.883356	0.130756	8.44182	23.9042	15.6266	0.400493	1.01541	41.6151
684	-0.0428797	5.90193	0.884181	0.12995	8.43558	23.879	15.6159	0.400157	1.01334	41.5718
685	-0.0436169	5.89844	0.884998	0.129144	8.42936	23.8538	15.6054	0.399806	1.01128	41.5285
686	-0.0443525	5.89495	0.885806	0.128338	8.42316	23.8287	15.5953	0.399443	1.00923	41.4853
687	-0.0450866	5.89146	0.886605	0.127532	8.41697	23.8035	34.2088	0.399065	1.00717	41.4421
688	-0.0458192	5.88796	0.887397	0.126726	8.41081	23.7784	34.1719	0.398676	1.00512	41.3989
689	-0.0465502	5.88447	0.888181	0.125921	8.40465	23.7533	34.1349	0.398273	1.00307	41.3558
690	-0.0472798	5.88097	0.888956	0.125115	8.39852	23.7283	34.098	0.397859	1.00102	41.3127
691	-0.0480078	5.87747	0.889724	0.12431	8.39239	23.7032	34.0611	0.397433	0.998975	41.2697
692	-0.0487342	5.87397	0.890485	0.123505	8.38628	23.6782	34.0243	0.396995	0.996932	41.2267
693	-0.0494592	5.87046	0.891237	0.122701	8.38019	23.6532	33.9876	0.396547	0.994892	41.1838
694	-0.0501826	5.86696	0.891982	0.121896	8.3741	23.6282	33.9509	0.396088	0.992855	41.1408
695	-0.0509044	5.86345	0.89272	0.121092	8.36803	23.6032	33.9144	0.395618	0.99082	41.098
696	-0.0516248	5.85995	0.89345	0.120288	8.36197	23.5783	33.878	0.395139	0.988787	41.0551
697	-0.0523436	5.85644	0.894173	0.119485	8.35592	23.5533	33.8416	0.394649	0.986757	41.0123
698	-0.0530608	5.85293	0.894889	0.118681	8.34988	23.5284	33.8054	0.394151	0.98473	40.9695
699	-0.0537766	5.84942	0.895598	0.117878	8.34385	23.5036	33.7692	0.393642	0.982706	40.9268
700	-0.0544907	5.8459	0.8963	0.117075	8.33783	23.4787	33.7331	0.393125	0.980683	40.8841
701	-0.0552034	5.84239	0.896994	0.116273	8.33182	23.4538	33.6971	0.3926	0.978664	40.8415
702	-0.0559145	5.83887	0.897682	0.115471	8.32581	23.429	33.6612	0.392065	0.976647	40.7989
703	-0.056624	5.83535	0.898363	0.114669	8.31982	23.4042	33.6253	0.391523	0.974633	40.7563
704	-0.057332	5.83184	0.899037	0.113868	8.31383	23.3794	33.5895	0.390973	0.972621	40.7137
705	-0.0580385	5.82832	0.899704	0.113067	8.30785	23.3547	33.5538	0.390415	0.970612	40.6712
706	-0.0587434	5.82479	0.900364	0.112266	8.30188	23.3299	33.5182	0.389849	0.968605	40.6288
707	-0.0594468	5.82127	0.901018	0.111466	8.29591	23.3052	33.4827	0.389276	0.966601	40.5864
708	-0.0601486	5.81774	0.901665	0.110666	8.28996	23.2805	33.4472	0.388696	0.964598	40.544
709	-0.0608489	5.81422	0.902306	0.109866	8.28395	23.2558	33.4118	0.38811	0.962595	40.5016
710	-0.0615476	5.81069	0.90294	0.109067	8.27791	23.2311	33.3764	0.387516	0.960592	40.4593
711	-0.0622447	5.80716	0.903567	0.108268	8.27182	23.2065	33.3411	0.386916	0.958588	40.4171
712	-0.0629403	5.80363	0.904189	0.10747	8.26569	23.1819	33.3059	0.38631	0.956583	40.3748
713	-0.0636344	5.8001	0.904803	0.106672	8.25953	23.1573	33.2708	0.385697	0.954711	40.3327
714	-0.0643269	5.79657	0.905412	0.105874	8.25334	23.1327	33.2357	0.385079	0.95296	40.2905
715	-0.0650178	5.79303	0.906014	0.105077	8.24712	23.1081	33.2006	0.384455	0.951321	40.2484
716	-0.0657072	5.78949	0.90661	0.104281	8.24086	23.0836	33.1656	0.383825	0.949785	40.2063
717	-0.066395	5.78596	0.9072	0.103484	8.23458	23.0591	33.1307	0.38319	0.948343	40.1643
718	-0.0670812	5.78242	0.907783	0.102689	8.22827	23.0346	33.0959	0.382549	0.946987	40.1223
719	-0.0677659	5.77888	0.90836	0.101893	8.22194	23.0101	33.0611	0.381903	0.945711	40.0803
720	-0.068449	5.77533	0.908931	0.101099	8.21558	22.9856	33.0263	0.381253	0.944508	40.0384
721	-0.0691306	5.77179	0.909496	0.100304	8.20921	22.9612	32.9916	0.380597	0.943373	39.9965
722	-0.0698106	5.76825	0.910055	0.0995104	8.20281	22.9368	32.957	0.379937	0.942299	39.9547
723	-0.070489	5.7647	0.910608	0.0987171	8.19639	22.9124	32.9224	0.379272	0.941283	39.9129
724	-0.0711658	5.76115	0.911155	0.0979242	8.18996	22.888	32.8879	0.378603	0.940318	39.8711
725	-0.0718411	5.7576	0.911696	0.0971319	8.1835	22.8636	32.8534	0.377929	0.939402	39.8294
726	-0.0725148	5.75405	0.912232	0.0963401	8.17704	22.8393	32.8189	0.377251	0.93853	39.7877
727	-0.0731869	5.7505	0.912761	0.0955487	8.17055	22.815	32.7846	0.376569	0.937699	39.7461
728	-0.0738575	5.74695	0.913284	0.094758	8.16406	22.7907	32.7502	0.375883	0.936906	39.7044
729	-0.0745265	5.74339	0.913801	0.0939677	8.15755	22.7664	32.7159	0.375193	0.936146	39.6629
730	-0.0751939	5.73984	0.914313	0.093178	8.15103	22.7421	32.6817	0.3745	0.935419	39.6213
731	-0.0758598	5.73628	0.914819	0.0923888	8.14449	22.7179	32.6475	0.373802	0.934721	39.5798
732	-0.076524	5.73272	0.915319	0.0916001	8.13795	22.6937	32.6134	0.373101	0.934049	39.5384
733	-0.0771867	5.72916	0.915813	0.090812	8.13139	22.6695	32.5793	0.372397	0.933402	39.497
734	-0.0778478	5.7256	0.916302	0.0900245	8.12483	22.6453	32.5452	0.37169	0.932778	39.4556
735	-0.0785073	5.72204	0.916785	0.0892375	8.11826	22.6211	32.5112	0.370979	0.932175	39.4142
736	-0.0791653	5.71847	0.917262	0.0884512	8.11168	22.597	32.4772	0.370265	0.931591	39.3729
737	-0.0798216	5.71491	0.917734	0.0876653	8.10509	22.5729	32.4433	0.369548	0.931024	39.3317
738	-0.0804764	5.71134	0.9182	0.0868801	8.09849	22.5488	32.4094	0.368828	0.930473	39.2904
739	-0.0811296	5.70777	0.91866	0.0860954	8.09189	22.5247	32.3756	0.368105	0.929937	39.2492
740	-0.0817812	5.7042	0.919115	0.0853114	8.08528	22.5006	32.3418	0.367379	0.929414	39.2081
741	-0.0824312	5.70063	0.919564	0.0845279	8.07867	22.4766	32.3081	0.36665	0.928904	39.167
742	-0.0830797	5.69706	0.920008	0.083745	8.07205	22.4526	32.2744	0.365919	0.928405	39.1259
743	-0.0837265	5.69349	0.920446	0.0829628	8.06542	22.4286	32.2407	0.365186	0.927916	39.0848
744	-0.0843718	5.68992	0.920879	0.0821811	8.05879	22.4046	32.2071	0.36445	0.927436	39.0438
745	-0.0850154	5.68634	0.921306	0.0814001	8.05216	22.3806	32.1735	0.363711	0.926965	39.0029
746	-0.0856575	5.68276	0.921728	0.0806197	8.04552	22.3567	32.1399	0.36297	0.926501	38.9619
747	-0.086298	5.67919	0.922144	0.0798399	8.03887	22.3328	32.1064	0.362227	0.926044	38.9211
748	-0.0869369	5.67561	0.922555	0.0790608	8.03223	22.3089	32.0729	0.361481	0.925594	38.8802
749	-0.0875742	5.67203	0.922961	0.0782823	8.02558	22.285	32.0395	0.360734	0.925149	38.8394
750	-0.0882099	5.66844	0.923361	0.0775044	8.01893	22.2612	32.0061	0.359984	0.92471	38.7986
751	-0.088844	5.66486	0.923756	0.0767272	8.01227	22.2373	31.9728	0.359232	0.924274	38.7579
752	-0.0894765	5.66128	0.924145	0.0759506	8.00562	22.2135	31.9395	0.358479	0.923843	38.7172
753	-0.0901074	5.65769	0.92453	0.0751747	7.99896	22.1897	31.9062	0.357723	0.923415	38.6765
754	-0.0907367	5.6541	0.924909	0.0743995	7.9923	22.1659	31.8729	0.356966	0.92299	38.6359
755	-0.0913645	5.65052	0.925282	0.0736249	7.98563	22.1422	31.8397	0.356207	0.922568	38.5953
756	-0.0919906	5.64693	0.925651	0.072851	7.97897	22.1184	31.8066	0.355446	0.922149	38.5547
757	-0.0926151	5.64334	0.926014	0.0720777	7.9723	22.0947	31.7734	0.354683	0.921731	38.5142
758	-0.093238	5.63975	0.926372	0.0713052	7.96563	22.071	31.7403	0.353919	0.921315	38.4737
759	-0.0938593	5.63615	0.926725	0.0705333	7.95896	22.0473	31.7073	0.353153	0.9209	38.4333
760	-0.094479	5.63256	0.927072	0.0697622	7.95229	22.0237	31.6743	0.352386	0.920486	38.3929
761	-0.0950971	5.62896	0.927415	0.0689917	7.94562	22	31.6413	0.351617	0.920073	38.3525
762	-0.0957136	5.62537	0.927752	0.0682219	7.93895	21.9764	31.6083	0.350847	0.91966	38.3122
763	-0.0963285	5.62177	0.928084	0.0674528	7.93228	21.9528	31.5754	0.350076	0.919248	38.2719
764	-0.0969418	5.61817	0.928411	0.0666844	7.92561	21.9292	31.5425	0.349303	0.918836	38.2317
765	-0.0975535	5.61457	0.928733	0.0659168	7.91893	21.9056	31.5097	0.348529	0.918424	38.1914
766	-0.0981635	5.61097	0.92905	0.0652805	7.91226	21.8821	31.4769	0.347753	0.918011	38.1513
767	-0.098772	5.60737	0.929362	0.0647694	7.90559	21.8586	31.4441	0.346977	0.917598	38.1111
768	-0.0993789	5.60377	0.929669	0.0643775	7.89891	21.8351	31.4113	0.346199	0.917185	38.071
769	-0.0999841	5.60016	0.929971	0.064099	7.89224	21.8116	31.3786	0.34542	0.91677	38.031
770	-0.100588	5.59656	0.930267	0.0639287	7.88557	21.7881	31.346	0.34464	0.916355	37.9909
771	-0.10119	5.59295	0.930559	0.0638615	7.8789	21.7647	31.3133	0.343859	0.915939	37.9509
772	-0.10179	5.58934	0.930846	0.0638925	7.87222	21.7413	31.2807	0.343077	0.915521	37.911
773	-0.102389	5.58574	0.931128	0.0640171	7.86555	21.7179	31.2481	0.342294	0.915102	37.871
774	-0.102986	5.58213	0.931405	0.0642311	7.85888	21.6945	31.2156	0.34151	0.914682	37.8312
775	-0.103582	5.57852	0.931677	0.0645302	7.85221	21.6711	31.1831	0.340726	0.914261	37.7913
776	-0.104176	5.5749	0.931944	0.0649106	7.84554	21.6478	31.1506	0.33994	0.913918	37.7515
777	-0.104768	5.57129	0.932303	0.0653685	7.83887	21.6244	31.1181	0.339154	0.913646	37.7117
778	-0.105359	5.56768	0.932748	0.0659004	7.8322	21.6011	31.0857	0.338367	0.913439	37.672
779	-0.105948	5.56406	0.933276	0.0665029	7.82553	21.5779	31.0533	0.337579	0.91329	37.6323
780	-0.106535	5.56045	0.933881	0.0671728	7.81886	21.5546	31.021	0.33679	0.913193	37.5926
781	-0.107121	5.55683	0.934559	0.067907	7.8122	21.5313	30.9887	0.336001	0.913144	37.553
782	-0.107705	5.55321	0.935308	0.0687028	7.80553	21.5081	30.9564	0.335211	0.913137	37.5134
783	-0.108288	5.54959	0.936122	0.0695572	7.79887	21.4849	30.9241	0.33442	0.913169	37.4739
784	-0.108869	5.54597	0.936999	0.0704678	7.7922	21.4617	30.8919	0.333629	0.913236	37.4343
785	-0.109448	5.54235	0.937936	0.071432	7.78554	21.4386	30.8597	0.332837	0.913334	37.3949
786	-0.110026	5.53873	0.938929	0.0724473	7.77888	21.4154	30.8276	0.332045	0.91346	37.3554
787	-0.110602	5.53511	0.939976	0.0735117	7.77222	21.3923	30.7954	0.331252	0.913612	37.316
788	-0.111177	5.53148	0.941074	0.0746228	7.76556	21.3692	30.7633	0.330458	0.913786	37.2766
789	-0.11175	5.52786	0.942221	0.0757787	7.75891	21.3461	30.7313	0.329665	0.913981	37.2373
790	-0.112321	5.52423	0.943413	0.0769774	7.75225	21.323	30.6992	0.32887	0.914194	37.198
791	-0.11289	5.52061	0.944649	0.0782169	7.74559	21.3	30.6672	0.328076	0.914424	37.1587
792	-0.113458	5.51698	0.945927	0.0794956	7.73894	21.2769	30.6352	0.327281	0.914668	37.1195
793	-0.114025	5.51335	0.947244	0.0808117	7.73229	21.2539	30.6033	0.326485	0.914925	37.0803
794	-0.11459	5.50972	0.9486	0.0821636	7.72564	21.2309	30.5714	0.32569	0.915193	37.0412
795	-0.115153	5.50609	0.949991	0.0835497	7.71899	21.208	30.5395	0.324893	0.915472	37.0021
796	-0.115714	5.50246	0.951417	0.0849686	7.71234	21.185	30.5076	0.324097	0.915759	36.963
797	-0.116274	5.49883	0.952875	0.0864188	7.7057	21.1621	30.4758	0.323301	0.916054	36.9239
798	-0.116832	5.49519	0.954364	0.087899	7.69905	21.1392	30.444	0.322504	0.916357	36.8849
799	-0.117389	5.49156	0.955883	0.0894078	7.69241	21.1163	30.4123	0.321707	0.916664	36.846
800	-0.117944	5.48793	0.95743	0.0909441	7.68577	21.0934	30.3805	0.320909	0.916977	36.8071
801	-0.118497	5.48429	0.959004	0.0925067	7.67913	21.0705	30.3488	0.320112	0.917294	36.7684
802	-0.119049	5.48065	0.960604	0.0940943	7.67249	21.0477	30.3172	0.319314	0.917614	36.7299
803	-0.119599	5.47702	0.962229	0.095706	7.66586	21.0249	30.2855	0.318516	0.917937	36.6915
804	-0.120147	5.47338	0.963877	0.0973407	7.65922	21.0021	30.2539	0.317719	0.918262	36.6532
805	-0.120694	5.46974	0.965547	0.0989973	7.65259	20.9793	30.2223	0.316921	0.918589	36.615
806	-0.121239	5.4661	0.967239	0.100675	7.64596	20.9566	30.1907	0.316122	0.918917	36.577
807	-0.121783	5.46246	0.968951	0.102373	7.63933	20.9338	30.1592	0.315324	0.919245	36.539
808	-0.122325	5.45882	0.970683	0.10409	7.63271	20.9111	30.1277	0.314526	0.919574	36.5012
809	-0.122865	5.45517	0.972433	0.105825	7.62608	20.8884	30.0963	0.313728	0.919902	36.4634
810	-0.123404	5.45153	0.974201	0.107578	7.61946	20.8657	30.0648	0.31293	0.92023	36.4258
811	-0.123941	5.44789	0.975986	0.109348	7.61284	20.8431	30.0334	0.312131	0.920557	36.3882
812	-0.124476	5.44424	0.977788	0.111134	7.60622	20.8204	30.002	0.311333	0.920883	36.3508
813	-0.12501	5.4406	0.979604	0.112935	7.5996	20.7978	29.9707	0.310535	0.921207	36.3134
814	-0.125542	5.43695	0.981436	0.114751	7.59298	20.7752	29.9393	0.309737	0.921529	36.2761
815	-0.126073	5.4333	0.983282	0.11658	7.58637	20.7526	29.908	0.308939	0.92185	36.2389
816	-0.126601	5.42965	0.985141	0.118423	7.57976	20.7301	29.8768	0.308141	0.922168	36.2018
817	-0.127129	5.42601	0.987013	0.120279	7.57315	20.7075	29.8455	0.307343	0.922484	36.1647
818	-0.127654	5.42236	0.988898	0.122147	7.56654	20.685	29.8143	0.306546	0.92276	36.1278
819	-0.128178	5.41871	0.990794	0.124027	7.55994	20.6625	29.7831	0.305748	0.923	36.0909
820	-0.1287	5.41506	0.992701	0.125917	7.55333	20.64	29.752	0.304951	0.923206	36.054
821	-0.129221	5.4114	0.994619	0.127818	7.54673	20.6175	29.7209	0.304153	0.923381	36.0173
822	-0.12974	5.40775	0.996548	0.129729	7.54013	20.5951	29.6898	0.303356	0.923528	35.9806
823	-0.130257	5.4041	0.998486	0.13165	7.53353	20.5727	29.6587	0.302559	0.923647	35.944
824	-0.130773	5.40044	1.00043	0.133579	7.52694	20.5502	29.6276	0.301763	0.923742	35.9074
825	-0.131287	5.39679	1.00239	0.135517	7.52034	20.5279	29.5966	0.300966	0.923814	35.8709
826	-0.131799	5.39314	1.00436	0.137464	7.51375	20.5055	29.5656	0.30017	0.923864	35.8345
827	-0.13231	5.38948	1.00633	0.139418	7.50716	20.4831	29.5347	0.299374	0.923894	35.7981
828	-0.132819	5.38582	1.00831	0.141379	7.50058	20.4608	29.5038	0.298578	0.923905	35.7618
829	-0.133327	5.38217	1.0103	0.143347	7.49399	20.4385	29.4728	0.297783	0.923898	35.7255
830	-0.133833	5.37851	1.01229	0.145322	7.48741	20.4162	29.442	0.296988	0.923876	35.6893
831	-0.134337	5.37485	1.01429	0.147303	7.48083	20.3939	29.4111	0.296193	0.923838	35.6531
832	-0.134839	5.37119	1.0163	0.149369	7.47425	20.3717	29.3803	0.295398	0.923785	35.617
833	-0.13534	5.36753	1.01832	0.151517	7.46767	20.3494	29.3495	0.294604	0.923719	35.581
834	-0.13584	5.36387	1.02034	0.153742	7.4611	20.3272	29.3188	0.29381	0.92364	35.545
835	-0.136337	5.36021	1.02236	0.156042	7.45453	20.305	29.288	0.293017	0.923549	35.5091
836	-0.136833	5.35655	1.02439	0.158411	7.44796	20.2829	29.2573	0.292224	0.923446	35.4732
837	-0.137328	5.35289	1.02643	0.160848	7.44139	20.2607	29.2266	0.291431	0.923332	35.4373
838	-0.13782	5.34922	1.02847	0.16335	7.43482	20.2386	29.196	0.290639	0.923209	35.4015
839	-0.138311	5.34556	1.03051	0.165913	7.42826	20.2164	29.1653	0.289847	0.923075	35.3658
840	-0.138809	5.3419	1.03256	0.168535	7.4217	20.1943	29.1347	0.289055	0.923032	35.3301
841	-0.139313	5.33823	1.03461	0.171214	7.41514	20.1723	29.1042	0.288264	0.923072	35.2944
842	-0.139824	5.33457	1.03667	0.173947	7.40859	20.1502	29.0736	0.287473	0.923185	35.2588
843	-0.14034	5.3309	1.03873	0.176732	7.40203	20.1282	29.0431	0.286683	0.923364	35.2232
844	-0.140862	5.32724	1.04079	0.179567	7.39548	20.1061	29.0126	0.285893	0.923602	35.1877
845	-0.14139	5.32357	1.04285	0.182451	7.38893	20.0841	28.9821	0.285103	0.923894	35.1522
846	-0.141923	5.3199	1.04492	0.185381	7.38238	20.0621	28.9517	0.284314	0.924233	35.1168
847	-0.142462	5.31624	1.04699	0.188357	7.37584	20.0402	28.9213	0.283526	0.924615	35.0814
848	-0.143005	5.31257	1.04907	0.191375	7.3693	20.0182	28.8909	0.282738	0.925036	35.0461
849	-0.143554	5.3089	1.05114	0.194496	7.36276	19.9963	28.8606	0.28195	0.925492	35.0108
850	-0.144107	5.30523	1.05322	0.197714	7.35622	19.9744	28.8302	0.281164	0.925978	34.9755
851	-0.144664	5.30156	1.0553	0.201025	7.34968	19.9525	28.7999	0.280377	0.926492	34.9403
852	-0.145226	5.29797	1.05738	0.204425	7.34315	19.9306	28.7696	0.279591	0.92703	34.9051
853	-0.145793	5.29446	1.05946	0.20791	7.33662	19.9088	28.7394	0.278806	0.92759	34.8699
854	-0.146363	5.29102	1.06155	0.211478	7.33009	19.887	28.7092	0.278021	0.92817	34.8348
855	-0.146937	5.28766	1.06363	0.215125	7.32356	19.8652	28.679	0.277237	0.928768	34.7997
856	-0.147515	5.28436	1.06572	0.21885	7.31704	19.8434	28.6488	0.276453	0.92938	34.7647
857	-0.148097	5.28114	1.06781	0.222649	7.31052	19.8216	28.6187	0.27567	0.930007	34.7297
858	-0.148682	5.27798	1.0699	0.226522	7.304	19.7998	28.5886	0.274887	0.930645	34.6948
859	-0.149271	5.27488	1.07199	0.230467	7.29748	19.7781	28.5585	0.274105	0.931293	34.6598
860	-0.149863	5.27185	1.07408	0.234482	7.29097	19.7564	28.5284	0.273324	0.931951	34.6249
861	-0.150458	5.26888	1.07617	0.238567	7.28446	19.7347	28.4984	0.272543	0.932616	34.5901
862	-0.151056	5.26597	1.07826	0.242721	7.27795	19.713	28.4683	0.271763	0.933288	34.5553
863	-0.151657	5.26311	1.08035	0.246945	7.27144	19.6913	28.4384	0.270983	0.933965	34.5205
864	-0.152261	5.26032	1.08244	0.251238	7.26494	19.6697	28.4084	0.270204	0.934647	34.4858
865	-0.152867	5.25757	1.08454	0.2556	7.25844	19.6481	28.3785	0.269426	0.935333	34.4511
866	-0.153476	5.25488	1.08663	0.260033	7.25194	19.6265	28.3486	0.268648	0.936022	34.4164
867	-0.154088	5.25225	1.08872	0.264538	7.24544	19.6049	28.3187	0.267871	0.936713	34.3818
868	-0.154702	5.24966	1.09081	0.269117	7.23892	19.5833	28.2888	0.267095	0.937406	34.3472
869	-0.155318	5.24713	1.09291	0.273771	7.23237	19.5618	28.259	0.266319	0.9381	34.3126
870	-0.155936	5.24464	1.09506	0.278504	7.2258	19.5403	28.2292	0.265544	0.938794	34.2781
871	-0.156557	5.24221	1.09727	0.283319	7.21921	19.5188	28.1994	0.26477	0.939488	34.2436
872	-0.157179	5.23982	1.09953	0.288221	7.2126	19.4973	28.1697	0.263996	0.940182	34.2091
873	-0.157804	5.23747	1.10185	0.293215	7.20597	19.4758	28.14	0.263223	0.940875	34.1747
874	-0.15843	5.23517	1.10423	0.298308	7.19933	19.4544	28.1103	0.262451	0.941567	34.1403
875	-0.159058	5.23292	1.10665	0.303509	7.19266	19.4329	28.0806	0.261679	0.942257	34.106
876	-0.159688	5.23071	1.10913	0.308829	7.18598	19.4115	28.0509	0.260909	0.942945	34.0716
877	-0.160319	5.22855	1.11165	0.314282	7.17929	19.3901	28.0212	0.260139	0.943631	34.0373
878	-0.160952	5.22642	1.11422	0.319885	7.17258	19.3687	27.9915	0.259369	0.944314	34.0031
879	-0.161586	5.22434	1.11684	0.325664	7.16585	19.3474	27.9618	0.258601	0.944994	33.9689
880	-0.162221	5.2223	1.1195	0.331654	7.15912	19.3261	27.9321	0.257833	0.945672	33.9347
881	-0.162858	5.2203	1.12221	0.337905	7.15237	19.3047	27.9025	0.257066	0.946346	33.9005
882	-0.163496	5.21835	1.12496	23.1826	7.14561	19.2834	27.8728	0.256299	0.947017	33.8664
883	-0.164136	5.21643	1.12776	23.1576	7.13884	19.2622	27.8432	0.255534	0.947685	33.8323
884	-0.164776	5.21455	1.1306	23.1326	7.13206	19.2409	27.8135	0.254769	0.948348	33.7982
885	-0.165417	5.21271	1.13348	23.1076	7.12527	19.2197	27.7839	0.254005	0.949008	33.7642
886	-0.16606	5.21091	1.13641	23.0827	7.11847	19.1984	27.7542	0.253241	0.949664	33.7302
887	-0.166703	5.20916	1.13938	23.0578	7.11166	19.1772	27.7246	0.252479	0.950315	33.6962
888	-0.167347	5.20744	1.14239	23.0331	7.10485	19.156	27.695	0.251717	0.950963	33.6623
889	-0.167992	5.20575	1.14544	23.0086	7.09802	19.1349	27.6654	0.250956	0.951606	33.6284
890	-0.168638	5.20411	1.14854	22.9843	7.09119	19.1137	27.6358	0.250196	0.952244	33.5945
891	-0.169284	5.20251	1.15168	22.9601	7.08436	19.0926	27.6062	0.249437	0.952878	33.5606
892	-0.169931	5.20094	1.15486	22.9362	7.07752	19.0715	27.5767	0.248679	0.953507	33.5268
893	-0.170579	5.19942	1.15809	22.9124	7.07067	19.0504	27.5471	0.247921	0.954132	33.493
894	-0.171227	5.19793	1.16136	22.8887	7.06382	19.0293	27.5176	0.247164	0.954752	33.4593
895	-0.171876	5.19649	1.16468	22.8652	7.05696	19.0083	27.4881	0.246408	0.955367	33.4256
896	-0.172525	5.19508	1.16805	22.8419	7.0501	18.9872	27.4586	0.245653	0.955977	33.3919
897	-0.17318	5.19371	1.17146	22.8186	7.04324	18.9662	27.4291	0.244899	0.956583	33.3582
898	-0.17384	5.19239	1.17492	22.7955	7.03637	18.9452	27.3996	0.244145	0.957183	33.3246
899	-0.174505	5.1911	1.17844	22.7725	7.0295	18.9243	27.3701	0.243393	0.957778	33.291
900	-0.175176	5.18986	1.182	22.7496	7.02262	18.9033	27.3407	0.242641	0.958368	33.2574
901	-0.175851	5.18865	1.18563	22.7268	7.01574	18.8824	27.3113	0.24189	0.958953	33.2239
902	-0.176531	5.1875	1.18931	22.7041	7.00887	18.8614	27.2819	0.24114	0.959533	33.1904
903	-0.177214	5.18638	1.19305	22.6815	7.00198	18.8405	27.2525	0.240391	0.960108	33.1569
904	-0.177902	5.18531	1.19686	22.659	6.9951	18.8197	27.2231	0.239643	0.960678	33.1234
905	-0.178594	5.18429	1.20073	22.6366	6.98822	18.7988	27.1937	0.238896	0.961242	33.09
906	-0.17929	5.18331	1.20468	22.6143	6.98133	18.7779	27.1644	0.238149	0.961802	33.0566
907	-0.179988	5.18238	1.20871	22.592	6.97444	18.7571	27.1351	0.237404	0.962356	33.0232
908	-0.180691	5.18151	1.21283	22.5698	6.96755	18.7363	27.1058	0.236659	0.962904	32.9899
909	-0.181396	5.18068	1.21704	22.5477	6.96067	18.7155	27.0765	0.235916	0.963448	32.9566
910	-0.182104	5.17991	1.22136	22.5257	6.95378	18.6948	27.0472	0.235173	0.963986	32.9233
911	-0.182815	5.1792	1.2258	22.5037	6.94689	18.674	27.018	0.234431	0.964519	32.8901
912	-0.183529	5.17855	1.23037	22.4818	6.94	18.6533	26.9888	0.23369	0.965047	32.8569
913	-0.184245	5.17796	1.2351	22.4599	6.93311	18.6326	26.9595	0.23295	0.965569	32.8237
914	-0.184964	5.17743	1.24002	22.4381	6.92622	18.6119	26.9304	0.232211	0.966086	32.7905
915	-0.185684	5.17698	1.24516	22.4164	6.91933	18.5912	26.9012	0.231473	0.966598	32.7574
916	-0.186407	5.1766	23.3716	22.3947	6.91244	18.5705	26.872	0.230736	0.967104	32.7243
917	-0.187132	5.17631	23.3461	22.3731	6.90555	18.5499	26.8429	0.23	0.967605	32.6912
918	-0.187859	5.1761	23.3207	22.3515	6.89867	18.5293	26.8138	0.229264	0.968101	32.6582
919	-0.188587	5.17599	23.2954	22.33	6.89178	18.5087	26.7847	0.22853	0.968591	32.6252
920	-0.189317	5.17599	23.27	22.3085	6.8849	18.4881	26.7557	0.227797	0.969076	32.5922
921	-0.190049	5.17611	23.2447	22.2869	6.87801	18.4675	26.7266	0.227064	0.969556	32.5592
922	-0.190782	5.17638	23.2195	22.2654	6.87113	18.447	26.6976	0.226333	0.97003	32.5263
923	-0.191516	5.1768	23.1945	22.2439	6.86425	18.4264	26.6686	0.225603	0.970499	32.4934
924	-0.192251	5.17741	23.1696	22.2223	6.85737	18.4059	26.6396	0.224873	0.970963	32.4605
925	-0.192988	5.17827	23.1448	22.2008	6.8505	18.3854	26.6107	0.224145	0.971421	32.4277
926	-0.193725	25.7467	23.1202	22.1792	6.84362	18.365	26.5818	0.223417	0.971874	32.3948
927	-0.194464	25.7234	23.0957	22.1577	6.83675	18.3445	26.5529	0.222691	0.972322	32.3621
928	-0.195203	25.7	23.0713	22.1362	6.82988	18.3241	26.524	0.221965	0.972765	32.3293
929	-0.195944	25.6767	23.0471	22.1147	6.82301	18.3037	26.4951	0.221241	0.973202	32.2966
930	-0.196685	25.6534	23.0229	22.0931	6.81614	18.2833	26.4663	0.220517	0.973634	32.2639
931	-0.197426	25.6301	22.9989	22.0716	6.80928	18.2629	26.4375	0.219795	0.974061	32.2312
932	-0.198168	25.6069	22.975	22.0501	6.80242	18.2425	26.4087	0.219073	0.974482	32.1985
933	-0.198911	25.5838	22.9511	22.0286	6.79556	18.2222	26.3799	0.218353	0.974898	32.1659
934	-0.199654	25.5607	22.9274	22.0071	6.7887	18.2019	26.3511	0.217633	0.975309	32.1333
935	-0.200398	25.5377	22.9038	21.9857	6.78185	18.1816	26.3224	0.216915	0.975715	32.1008
936	-0.201141	25.5148	22.8803	21.9642	6.775	18.1613	26.2937	0.216198	0.976115	32.0682
937	-0.201885	25.4919	22.8569	21.9427	6.76815	18.141	26.265	0.215481	0.97651	32.0357
938	-0.20263	25.4691	22.8335	21.9213	6.76131	18.1208	26.2364	0.214766	0.9769	32.0032
939	-0.203374	25.4464	22.8103	21.8998	6.75446	18.1005	26.2078	0.214052	0.977285	31.9708
940	-0.204118	25.4237	22.7871	21.8784	6.74762	18.0803	26.1792	0.213339	0.977664	31.9383
941	-0.204863	25.4011	22.7641	21.8569	6.74079	18.0601	26.1506	0.212626	0.978038	31.9059
942	-0.205607	25.3785	22.7411	21.8355	6.73396	18.0399	26.122	0.211915	0.978407	31.8736
943	-0.206352	25.356	22.7181	21.8141	6.72713	18.0198	26.0935	0.211205	0.978771	31.8412
944	-0.207096	25.3336	22.6953	21.7927	6.7203	17.9997	26.065	0.210496	0.97913	31.8089
945	-0.20784	25.3112	22.6726	21.7714	6.71348	17.9795	26.0365	0.209788	0.979484	31.7766
946	-0.208584	25.2888	22.6499	21.75	6.70666	17.9594	26.008	0.209081	0.979832	31.7444
947	-0.209328	25.2666	22.6273	21.7286	6.69984	17.9394	25.9796	0.208376	0.980175	31.7121
948	-0.210072	25.2443	22.6047	21.7073	6.69303	17.9193	25.9512	0.207671	0.980514	31.6799
949	-0.210815	25.2222	22.5822	21.686	6.68622	17.8992	25.9228	0.206967	0.980847	31.6477
950	-0.211558	25.2	22.5598	21.6646	6.67941	17.8792	25.8944	0.206265	0.981175	31.6156
951	-0.2123	25.178	22.5375	21.6433	6.67261	17.8592	25.8661	0.205563	0.981497	31.5834
952	-0.213042	25.156	22.5152	21.622	6.66579	17.8392	25.8378	0.204863	0.981815	31.5513
953	-0.213784	25.134	22.493	21.6008	6.65897	17.8192	25.8095	0.204164	0.982128	31.5193
954	-0.214525	25.1121	22.4709	21.5795	6.65214	17.7993	25.7812	0.203465	0.982436	31.4872
955	-0.215266	25.0902	22.4488	21.5583	6.6453	17.7794	25.753	0.202768	0.982738	31.4552
956	-0.216006	25.0684	22.4267	21.537	6.63845	17.7594	25.7248	0.202072	0.983036	31.4232
957	-0.216745	25.0466	22.4048	21.5158	6.6316	17.7395	25.6966	0.201377	0.983328	31.3912
958	-0.217484	25.0249	22.3829	21.4946	6.62473	17.7197	25.6684	0.200684	0.983616	31.3593
959	-0.218222	25.0032	22.361	21.4734	6.61787	17.6998	25.6403	0.199991	0.983899	31.3274
960	-0.21896	24.9816	22.3392	21.4522	6.61099	17.68	25.6121	0.199299	0.984176	31.2955
961	-0.219697	24.96	22.3175	21.431	6.60412	17.6601	25.5841	0.198609	0.984449	31.2636
962	-0.220433	24.9384	22.2958	21.4099	6.59723	17.6403	25.556	0.19792	0.984716	31.2318
963	-0.221169	24.9169	22.2741	21.3888	6.59035	17.6205	25.528	0.197232	0.984979	31.2
964	-0.221904	24.8955	22.2525	21.3676	6.58346	17.6008	25.4999	0.196544	0.985237	31.1682
965	-0.222638	24.874	22.231	21.3465	6.57656	17.581	25.4719	0.195859	0.98549	31.1365
966	-0.223371	24.8527	22.2095	21.3254	6.56967	17.5613	25.444	0.195174	0.985737	31.1047
967	-0.224103	24.8313	22.1881	21.3044	6.56277	17.5416	25.416	0.19449	0.98598	31.073
968	-0.224835	24.81	22.1667	21.2833	6.55587	17.5219	25.3881	0.193808	0.986218	31.0414
969	-0.225566	24.7888	22.1453	21.2623	6.54897	17.5022	25.3602	0.193126	0.986452	31.0097
970	-0.226295	24.7676	22.124	21.2412	6.54206	17.4825	25.3324	0.192446	0.98668	30.9781
971	-0.227024	24.7464	22.1028	21.2202	6.53516	17.4629	25.3045	0.191767	0.986904	30.9465
972	-0.227752	24.7252	22.0816	21.1992	6.52825	17.4433	25.2767	0.191089	0.987086	30.9149
973	-0.22848	24.7041	22.0604	21.1782	6.52135	17.4237	25.2489	0.190412	0.987229	30.8834
974	-0.229206	24.6831	22.0393	21.1572	6.51444	17.4041	25.2212	0.189737	0.987336	30.8519
975	-0.229931	24.6621	22.0182	21.1363	6.50754	17.3845	25.1934	0.189062	0.987407	30.8204
976	-0.230655	24.6411	21.9972	21.1153	6.50063	17.365	25.1657	0.188389	0.987446	30.7889
977	-0.231378	24.6201	21.9762	21.0944	6.49373	17.3454	25.138	0.187717	0.987454	30.7575
978	-0.232101	24.5992	21.9553	21.0735	6.48682	17.3259	25.1104	0.187046	0.987433	30.7261
979	-0.232822	24.5783	21.9344	21.0526	6.47992	17.3064	25.0827	0.186376	0.987383	30.6947
980	-0.233542	24.5575	21.9135	21.0317	6.47302	17.287	25.0551	0.185707	0.987307	30.6633
981	-0.234261	24.5367	21.8927	21.0109	6.46612	17.2675	25.0276	0.18504	0.987206	30.632
982	-0.234979	24.5159	21.8719	20.99	6.45922	17.2481	25	0.184374	0.987082	30.6007
983	-0.235696	24.4951	21.8512	20.9692	6.45233	17.2286	24.9725	0.183708	0.986935	30.5694
984	-0.236412	24.4744	21.8305	20.9484	6.44543	17.2092	24.945	0.183045	0.986766	30.5381
985	-0.237127	24.4538	21.8098	20.9276	6.43854	17.1899	24.9175	0.182382	0.986577	30.5069
986	-0.237841	24.4331	21.7892	20.9068	6.43165	17.1705	24.89	0.18172	0.986369	30.4757
987	-0.238554	24.4125	21.7686	20.886	6.42476	17.1511	24.8626	0.18106	0.986143	30.4445
988	-0.239265	24.3919	21.748	20.8652	6.41787	17.1318	24.8352	0.180401	0.985899	30.4134
989	-0.239975	24.3714	21.7275	20.8445	6.41099	17.1125	24.8078	0.179743	0.985638	30.3822
990	-0.240685	24.3509	21.7071	20.8238	6.40411	17.0932	24.7804	0.179086	0.985362	30.3511
991	-0.241393	24.3304	21.6866	20.8031	6.39723	17.0739	24.7531	0.178431	0.98507	30.32
992	-0.2421	24.3099	21.6662	20.7824	6.39036	17.0547	24.7258	0.177776	0.984764	30.289
993	-0.242805	24.2895	21.6458	20.7617	6.38349	17.0354	24.6985	0.177123	0.984444	30.258
994	-0.24351	24.2691	21.6255	20.741	6.37662	17.0162	24.6713	0.176471	0.984111	30.227
995	-0.244213	24.2488	21.6052	20.7204	6.36976	16.997	24.6441	0.175821	0.983765	30.196
996	-0.244915	24.2284	21.585	20.6998	6.3629	16.9778	24.6169	0.175171	0.983407	30.165
997	-0.245616	24.2081	21.5647	20.6791	6.35604	16.9587	24.5897	0.174523	0.983038	30.1341
998	-0.246316	24.1879	21.5445	20.6585	6.34918	16.9395	24.5625	0.173876	0.982658	30.1032
999	-0.247014	24.1676	21.5244	20.638	6.34233	16.9204	24.5354	0.17323	0.982267	30.0724
1000	-0.247711	24.1474	21.5042	20.6174	6.33549	16.9013	24.5083	0.172586	0.981865	30.0415
1001	-0.248407	24.1272	21.4842	20.5968	6.32865	16.8822	24.4812	0.171942	0.981454	30.0107
1002	-0.249102	24.1071	21.4641	20.5763	6.32181	16.8631	24.4542	0.1713	0.981034	29.9799
1003	-0.249795	24.0869	21.4441	20.5558	6.31497	16.844	24.4272	0.170659	0.980604	29.9491
1004	-0.250487	24.0668	21.4241	20.5353	6.30814	16.825	24.4002	0.17002	0.980166	29.9184
1005	-0.251178	24.0468	21.4041	20.5148	6.30132	16.806	24.3732	0.169381	0.97972	29.8877
1006	-0.251868	24.0267	21.3842	20.4943	6.29449	16.787	24.3463	0.168744	0.979265	29.857
1007	-0.252556	24.0067	21.3643	20.4738	6.28768	16.768	24.3193	0.168108	0.978803	29.8263
1008	-0.253243	23.9867	21.3444	20.4534	6.28086	16.749	24.2924	0.167473	0.978333	29.7957
1009	-0.253929	23.9667	21.3246	20.433	6.27405	16.7301	24.2656	0.16684	0.977855	29.765
1010	-0.254613	23.9468	21.3048	20.4126	6.26725	16.7111	24.2387	0.166208	0.977371	29.7344
1011	-0.255296	23.9269	21.285	20.3922	6.26045	16.6922	24.2119	0.165577	0.97688	29.7039
1012	-0.255978	23.907	21.2653	20.3718	6.25365	16.6733	24.1851	0.164947	0.976382	29.6733
1013	-0.256658	23.8871	21.2456	20.3514	6.24686	16.6544	24.1584	0.164318	0.975878	29.6428
1014	-0.257337	23.8673	21.2259	20.3311	6.24007	16.6356	24.1316	0.163691	0.975368	29.6123
1015	-0.258015	23.8475	21.2063	20.3107	6.23329	16.6167	24.1049	0.163065	0.974852	29.5819
1016	-0.258691	23.8277	21.1866	20.2904	6.22651	16.5979	24.0782	0.162441	0.974329	29.5514
1017	-0.259366	23.808	21.167	20.2701	6.21974	16.5791	24.0516	0.161817	0.973802	29.521
1018	-0.26004	23.7882	21.1475	20.2498	6.21297	16.5603	24.0249	0.161195	0.973268	29.4906
1019	-0.260712	23.7685	21.128	20.2295	6.20621	16.5415	23.9983	0.160574	0.97273	29.4602
1020	-0.261383	23.7488	21.1085	20.2093	6.19945	16.5228	23.9717	0.159955	0.972186	29.4299
1021	-0.262053	23.7292	21.089	20.189	6.1927	16.5041	23.9452	0.159336	0.971637	29.3996
1022	-0.262721	23.7096	21.0696	20.1688	6.18595	16.4853	23.9186	0.158719	0.971083	29.3693
1023	-0.263388	23.6899	21.0502	20.1486	6.17921	16.4666	23.8921	0.158103	0.970524	29.339
1024	-0.264053	23.6704	21.0308	20.1284	6.17247	16.448	23.8656	0.157489	0.969961	29.3088
1025	-0.264718	23.6508	21.0114	20.1082	6.16574	16.4293	23.8392	0.156876	0.969393	29.2786
1026	-0.26538	23.6313	20.9921	20.0881	6.15901	16.4106	23.8127	0.156264	0.968821	29.2484
1027	-0.266042	23.6117	20.9728	20.0679	6.15229	16.392	23.7863	0.155653	0.968244	29.2182
1028	-0.266701	23.5922	20.9536	20.0478	6.14557	16.3734	23.7599	0.155043	0.967663	29.188
1029	-0.26736	23.5728	20.9343	20.0277	6.13885	16.3548	23.7336	0.154435	0.967077	29.1579
1030	-0.268017	23.5533	20.9151	20.0076	6.13215	16.3362	23.7072	0.153828	0.966488	29.1278
1031	-0.268673	23.5339	20.8959	19.9875	6.12544	16.3177	23.6809	0.153223	0.965894	29.0978
1032	-0.269327	23.5145	20.8768	19.9674	6.11875	16.2991	23.6546	0.152619	0.965297	29.0677
1033	-0.26998	23.4951	20.8577	19.9474	6.11205	16.2806	23.6284	0.152016	0.964696	29.0377
1034	-0.270631	23.4758	20.8386	19.9273	6.10537	16.2621	23.6022	0.151414	0.964091	29.0077
1035	-0.271282	23.4564	20.8195	19.9073	6.09868	16.2436	23.576	0.150814	0.963482	28.9777
1036	-0.27193	23.4371	20.8005	19.8873	6.09201	16.2251	23.5498	0.150215	0.962869	28.9478
1037	-0.272577	23.4178	20.7815	19.8673	6.08534	16.2067	23.5236	0.149617	0.962253	28.9179
1038	-0.273223	23.3986	20.7625	19.8473	6.07867	16.1882	23.4975	0.14902	0.961634	28.888
1039	-0.273867	23.3793	20.7436	19.8274	6.07201	16.1698	23.4714	0.148425	0.96101	28.8581
1040	-0.27451	23.3601	20.7246	19.8074	6.06535	16.1514	23.4453	0.147831	0.960384	28.8283
1041	-0.275152	23.3409	20.7057	19.7875	6.0587	16.133	23.4192	0.147239	0.959754	28.7984
1042	-0.275792	23.3217	20.6869	19.7676	6.05206	16.1146	23.3932	0.146647	0.959121	28.7686
1043	-0.27643	23.3025	20.668	19.7477	6.04542	16.0963	23.3672	0.146057	0.958484	28.7389
1044	-0.277068	23.2834	20.6492	19.7278	6.03878	16.0779	23.3412	0.145469	0.957845	28.7091
1045	-0.277703	23.2643	20.6304	19.7079	6.03216	16.0596	23.3153	0.144881	0.957202	28.6794
1046	-0.278337	23.2452	20.6117	19.688	6.02553	16.0413	23.2893	0.144295	0.956556	28.6497
1047	-0.27897	23.2261	20.5929	19.6682	6.01891	16.023	23.2634	0.143711	0.955907	28.62
1048	-0.279602	23.2071	20.5742	19.6484	6.0123	16.0047	23.2376	0.143127	0.955255	28.5904
1049	-0.280231	23.188	20.5556	19.6286	6.00569	15.9864	23.2117	0.142545	0.9546	28.5607
1050	-0.28086	23.169	20.5369	19.6088	5.99909	15.9682	23.1859	0.141964	0.953942	28.5311
1051	-0.281487	23.15	20.5183	19.589	5.9925	15.95	23.1601	0.141385	0.953281	28.5015
1052	-0.282112	23.131	20.4997	19.5692	5.98591	15.9318	23.1343	0.140807	0.952617	28.472
1053	-0.282736	23.1121	20.4811	19.5495	5.97932	15.9136	23.1085	0.14023	0.95195	28.4425
1054	-0.283359	23.0931	20.4626	19.5298	5.97274	15.8954	23.0828	0.139775	0.951281	28.413
1055	-0.28398	23.0742	20.4441	19.51	5.96617	15.8772	23.0571	0.139439	0.950609	28.3835
1056	-0.284599	23.0553	20.4256	19.4903	5.9596	15.8591	23.0314	0.139216	0.949934	28.354
1057	-0.285217	23.0364	20.4071	19.4707	5.95303	15.841	23.0058	0.139105	0.949256	28.3246
1058	-0.285834	23.0176	20.3887	19.451	5.94647	15.8229	22.9802	0.1391	0.948575	28.2952
1059	-0.286449	22.9987	20.3703	19.4313	5.93992	15.8048	22.9545	0.139198	0.947892	28.2658
1060	-0.286926	22.9799	20.3519	19.4117	5.93338	15.7867	22.929	0.139397	0.947207	28.2364
1061	-0.287271	22.9611	20.3336	19.3921	5.92683	15.7687	22.9034	0.139693	0.946518	28.2071
1062	-0.28749	22.9423	20.3152	19.3725	5.9203	15.7506	22.8779	0.140082	0.945827	28.1778
1063	-0.287588	22.9236	20.297	19.3529	5.91377	15.7326	22.8524	0.140563	0.945134	28.1485
1064	-0.28757	22.9048	20.2787	19.3333	5.90724	15.7146	22.8269	0.141132	0.944548	28.1192
1065	-0.287441	22.8861	20.2604	19.3137	5.90072	15.6966	22.8015	0.141786	0.944063	28.09
1066	-0.287206	22.8674	20.2422	19.2942	5.89421	15.6786	22.776	0.142524	0.943673	28.0608
1067	-0.286869	22.8487	20.224	19.2746	5.8877	15.6607	22.7506	0.143341	0.943371	28.0316
1068	-0.286435	22.83	20.2059	19.2551	5.8812	15.6428	22.7252	0.144237	0.943152	28.0024
1069	-0.285907	22.8114	20.1877	19.2356	5.8747	15.6248	22.6999	0.145209	0.943012	27.9733
1070	-0.28529	22.7928	20.1696	19.2161	5.86821	15.607	22.6746	0.146254	0.942944	27.9441
1071	-0.284587	22.7741	20.1516	19.1967	5.86172	15.5891	22.6493	0.147371	0.942946	27.915
1072	-0.283802	22.7555	20.1335	19.1772	5.85524	15.5712	22.624	0.148557	0.943012	27.886
1073	-0.282938	22.737	20.1155	19.1578	5.84877	15.5534	22.5987	0.14981	0.943138	27.8569
1074	-0.281998	22.7184	20.0975	19.1383	5.8423	15.5355	22.5735	0.151129	0.943322	27.8279
1075	-0.280986	22.6999	20.0795	19.1189	5.83584	15.5177	22.5483	0.152512	0.943558	27.7989
1076	-0.279904	22.6813	20.0616	19.0995	5.82938	15.4999	22.5231	0.153956	0.943846	27.7699
1077	-0.278755	22.6628	20.0437	19.0801	5.82293	15.4822	22.4979	0.155462	0.94418	27.741
1078	-0.277542	22.6443	20.0258	19.0608	5.81647	15.4644	22.4728	0.157026	0.944559	27.712
1079	-0.276267	22.6259	20.0079	19.0414	5.81002	15.4467	22.4477	0.158647	0.944979	27.6831
1080	-0.274934	22.6074	19.9901	19.0221	5.80356	15.4289	22.4226	0.160325	0.945439	27.6543
1081	-0.273543	22.589	19.9723	19.0028	5.79711	15.4112	22.3976	0.162056	0.945935	27.6254
1082	-0.272098	22.5705	19.9545	18.9835	5.79065	15.3935	22.3725	0.163841	0.946466	27.5966
1083	-0.2706	22.5521	19.9368	18.9642	5.7842	15.3759	22.3475	0.165678	0.94703	27.5678
1084	-0.269052	22.5338	19.9191	18.9449	5.77775	15.3582	22.3225	0.167566	0.947624	27.539
1085	-0.267455	22.5154	19.9014	18.9256	5.77129	15.3406	22.2976	0.169503	0.948247	27.5102
1086	-0.265812	22.497	19.8837	18.9064	5.76484	15.323	22.2726	0.171488	0.948896	27.4815
1087	-0.264124	22.4787	19.8661	18.8872	5.75839	15.3054	22.2477	0.173521	0.949529	27.4528
1088	-0.262393	22.4604	19.8485	18.8679	5.75194	15.2878	22.2228	0.1756	0.950146	27.4241
1089	-0.26062	22.4421	19.8309	18.8487	5.74549	15.2702	22.198	0.177725	0.950747	27.3954
1090	-0.258808	22.4238	19.8134	18.8296	5.73905	15.2527	22.1731	0.179894	0.951333	27.3667
1091	-0.256957	22.4055	19.7958	18.8104	5.7326	15.2351	22.1483	0.182107	0.951905	27.3381
1092	-0.255069	22.3873	19.7783	18.7912	5.72616	15.2176	22.1235	0.184362	0.952463	27.3095
1093	-0.253146	22.369	19.7609	18.7721	5.71972	15.2001	22.0988	0.18666	0.953008	27.281
1094	-0.251189	22.3508	19.7435	18.753	5.71329	15.1827	22.074	0.188999	0.95354	27.2524
1095	-0.249198	22.3326	19.7261	18.7338	5.70685	15.1652	22.0493	0.191378	0.95406	27.2239
1096	-0.247176	22.3144	19.7087	18.7148	5.70042	15.1478	22.0246	0.193797	0.954569	27.1954
1097	-0.245124	22.2962	19.6913	18.6957	5.694	15.1303	22	0.196256	0.955065	27.1669
1098	-0.243042	22.2781	19.674	18.6766	5.68757	15.1129	21.9753	0.198753	0.955551	27.1384
1099	-0.240932	22.2599	19.6565	18.6576	5.68115	15.0955	21.9507	0.201289	0.956026	27.11
1100	-0.238794	22.2418	19.6391	18.6385	5.67473	15.0782	21.9261	0.203862	0.956491	27.0816
1101	-0.23663	22.2237	19.6215	18.6195	5.66832	15.0608	21.9015	0.206472	0.956946	27.0532
1102	-0.234441	22.2056	19.604	18.6005	5.66191	15.0435	21.877	0.209119	0.957391	27.0249
1103	-0.232228	22.1875	19.5863	18.5814	5.6555	15.0262	21.8525	0.211803	0.957826	26.9965
1104	-0.229991	22.1695	19.5685	18.5623	5.64909	15.0089	21.828	0.214522	0.958253	26.9682
1105	-0.227732	22.1514	19.5506	18.5433	5.64269	14.9916	21.8035	0.217278	0.95867	26.9399
1106	-0.22545	22.1334	19.5326	18.5242	5.6363	14.9743	21.779	0.220068	0.959079	26.9116
1107	-0.223148	22.1154	19.5144	18.5051	5.6299	14.9571	21.7546	0.222894	0.959479	26.8834
1108	-0.220825	22.0974	19.4962	18.486	5.62352	14.9399	21.7302	0.225755	0.959871	26.8552
1109	-0.218483	22.0794	19.4779	18.4669	5.61713	14.9226	21.7058	0.22865	0.960255	26.827
1110	-0.216123	22.0614	19.4595	18.4478	5.61075	14.9054	21.6815	0.231581	0.960631	26.7988
1111	-0.213744	22.0435	19.441	18.4286	5.60438	14.8883	21.6572	0.234545	0.960999	26.7707
1112	-0.211347	22.0255	19.4225	18.4095	5.59801	14.8711	21.6329	0.237544	0.96136	26.7425
1113	-0.208934	22.0076	19.4038	18.3904	5.59164	14.854	21.6086	0.240578	0.961713	26.7144
1114	-0.206504	21.9897	19.3851	18.3712	5.58528	14.8368	21.5843	0.243646	0.962059	26.6863
1115	-0.204059	21.9718	19.3663	18.3521	5.57892	14.8197	21.5601	0.246748	0.962397	26.6583
1116	-0.201599	21.9539	19.3474	18.333	5.57257	14.8027	21.5359	0.249885	0.962729	26.6303
1117	-0.199124	21.936	19.3285	18.3138	5.56622	14.7856	21.5117	0.253057	0.963054	26.6022
1118	-0.196635	21.9182	19.3095	18.2947	5.55987	14.7685	21.4875	0.256264	0.963372	26.5743
1119	-0.194133	21.9003	19.2904	18.2756	5.55353	14.7515	21.4634	0.259506	0.963683	26.5463
1120	-0.191618	21.8825	19.2713	18.2564	5.5472	14.7345	21.4393	0.262783	0.963988	26.5183
1121	-0.18909	21.8648	19.2521	18.2373	5.54087	14.7175	21.4152	0.266097	0.964286	26.4904
1122	-0.18655	21.8471	19.2329	18.2182	5.53455	14.7005	21.3911	0.269446	0.964577	26.4625
1123	-0.183999	21.8295	19.2136	18.1991	5.52823	14.6835	21.3671	0.272832	0.964863	26.4347
1124	-0.181437	21.812	19.1943	18.1799	5.52191	14.6666	21.3431	0.276256	0.965142	26.4068
1125	-0.178863	21.7946	19.175	18.1608	5.5156	14.6496	21.3191	0.279717	0.965415	26.379
1126	-0.17628	21.7772	19.1556	18.1417	5.5093	14.6327	21.2951	0.283217	0.965682	26.3512
1127	-0.173686	21.76	19.1361	18.1226	5.503	14.6158	21.2712	0.286756	0.965943	26.3234
1128	-0.171083	21.7427	19.1167	18.1035	5.4967	14.599	21.2472	0.290336	0.966198	26.2956
1129	-0.168471	21.7256	19.0972	18.0844	5.49041	14.5821	21.2233	0.293956	0.966447	26.2679
1130	-0.165849	21.7085	19.0776	18.0653	5.48413	14.5653	21.1995	0.297619	0.966691	26.2402
1131	-0.16322	21.6915	19.0581	18.0463	5.47785	14.5484	21.1756	0.301325	0.966928	26.2125
1132	-0.160582	21.6746	19.0385	18.0272	5.47158	14.5316	21.1518	0.305076	0.96716	26.1848
1133	-0.157936	21.6577	19.0188	18.0081	5.46531	14.5148	21.128	0.308873	0.967387	26.1572
1134	-0.155282	21.6409	18.9992	17.9891	5.45905	14.4981	21.1042	0.312718	0.967608	26.1296
1135	-0.152622	21.6242	18.9795	17.97	5.45279	14.4813	21.0805	0.316613	0.967823	26.102
1136	-0.149954	21.6075	18.9598	17.951	5.44666	14.4646	21.0569	0.32056	0.968033	26.0744
1137	-0.14728	21.5909	18.9401	17.932	5.44066	14.4478	21.0334	0.324561	0.968237	26.0469
1138	-0.144599	21.5743	18.9204	17.9129	5.43477	14.4311	21.0101	0.328619	0.968436	26.0193
1139	-0.141912	21.5578	18.9006	17.8939	5.42899	14.4144	20.987	0.332737	0.968629	25.9918
1140	-0.139219	21.5414	18.8809	17.8749	5.42332	14.3978	20.964	0.336918	0.968818	25.9644
1141	-0.136521	21.525	18.8611	17.8559	5.41775	14.3811	20.9412	0.341167	0.969001	25.9369
1142	-0.133817	21.5087	18.8413	17.837	5.41227	14.3645	20.9185	0.345487	0.969179	25.9095
1143	-0.131108	21.4925	18.8215	17.818	5.40688	14.3479	20.8959	0.349884	0.969351	25.8821
1144	-0.128394	21.4763	18.8017	17.799	5.40158	14.3313	20.8734	0.354275	0.969519	25.8547
1145	-0.125675	21.4602	18.7819	17.7801	5.39635	14.3147	20.8511	0.35866	0.969681	25.8273
1146	-0.122952	21.4441	18.7621	17.7612	5.39121	14.2981	20.8289	0.363039	0.969838	25.8
1147	-0.120224	21.4282	18.7422	17.7422	5.38613	14.2816	20.8068	0.367412	0.96999	25.7726
1148	-0.117493	21.4122	18.7224	17.7233	5.38112	14.2651	20.7848	0.371781	0.970138	25.7453
1149	-0.114757	21.3964	18.7025	17.7044	5.37618	14.2485	20.7629	0.376145	0.97028	25.7181
1150	-0.112018	21.3806	18.6827	17.6855	5.3713	14.232	20.7412	0.380505	0.970417	25.6908
1151	-0.109275	21.3648	18.6628	17.6667	5.36647	14.2156	20.7195	0.38486	0.970549	25.6636
1152	-0.106529	21.3491	18.643	17.6478	5.36171	14.1991	20.6979	0.389212	0.970677	25.6364
1153	-0.10378	21.3335	18.6231	17.629	5.35699	14.1827	20.6765	0.393561	0.970799	25.6092
1154	-0.101028	21.318	18.6032	17.6101	5.35233	14.1662	20.6551	0.397908	0.970917	25.582
1155	-0.0982732	21.3025	18.5834	17.5913	5.34771	14.1498	20.6338	0.402252	0.97103	25.5549
1156	-0.0955156	21.2871	18.5635	17.5725	5.34314	14.1334	20.6127	0.406594	0.971138	25.5278
1157	-0.0927554	21.2718	18.5437	17.5537	5.33861	14.1171	20.5916	0.410936	0.971241	25.5007
1158	-0.089993	21.2565	18.5238	17.5349	5.33413	14.1007	20.5706	0.415277	0.97134	25.4736
1159	-0.0872283	21.2413	18.5039	17.5161	5.32968	14.0844	20.5497	0.419618	0.971433	25.4466
1160	-0.0844616	21.2262	18.4841	17.4974	5.32527	14.068	20.5288	0.423961	0.971523	25.4195
1161	-0.081693	21.2112	18.4642	17.4786	5.3209	14.0517	20.5081	0.428305	0.971607	25.3925
1162	-0.0789226	21.1963	18.4444	17.4599	5.31656	14.0355	20.4874	0.432651	0.971687	25.3656
1163	-0.0761506	21.1814	18.4246	17.4412	5.31226	14.0192	20.4668	0.437001	0.971762	25.3386
1164	-0.073377	21.1667	18.4047	17.4225	5.30798	14.003	20.4463	0.441354	0.971832	25.3117
1165	-0.0706021	21.152	18.3849	17.4038	5.30374	13.9867	20.4258	0.445713	0.971898	25.2847
1166	-0.0678259	21.1375	18.3651	17.3851	5.29952	13.9705	20.4055	0.450079	0.97196	25.2579
1167	-0.0650486	21.123	18.3452	17.3664	5.29533	13.9543	20.3852	0.454451	0.972016	25.231
1168	-0.0622702	21.1087	18.3254	17.3478	5.29116	13.9381	20.3649	0.458833	0.972069	25.2041
1169	-0.059491	21.0946	18.3056	17.3292	5.28702	13.922	20.3448	0.463224	0.972116	25.1773
1170	-0.0567109	21.0806	18.2858	17.3105	5.28291	13.9058	20.3247	0.467627	0.97216	25.1505
1171	-0.0539302	21.0668	18.266	17.2919	5.27881	13.8897	20.3046	0.472043	0.972198	25.1238
1172	-0.0511489	21.0531	18.2463	17.2733	5.27474	13.8736	20.2847	0.476474	0.972233	25.097
1173	-0.0483671	21.0398	18.2265	17.2548	5.27069	13.8575	20.2648	0.480921	0.972262	25.0703
1174	-0.0455849	41.5938	18.2067	17.2362	5.26665	13.8414	20.2449	0.485388	0.972288	25.0436
1175	-0.0428024	41.5562	18.187	17.2177	5.26264	13.8254	20.2251	0.489876	0.972309	25.0169
1176	-0.0400198	41.5187	18.1672	17.1991	5.25864	13.8094	20.2054	0.494389	0.972325	24.9902
1177	-0.0372371	41.4812	18.1475	17.1806	5.25466	13.7933	20.1857	0.498929	0.972338	24.9636
1178	-0.0344543	41.4437	18.1278	17.1621	5.2507	13.7773	20.1661	0.503499	0.972346	24.9369
1179	-0.0316717	41.4063	18.1081	17.1436	5.24675	13.7614	20.1466	0.508104	0.972349	24.9103
1180	-0.0288892	41.369	18.0884	17.1252	5.24282	13.7454	20.1271	0.512748	0.972348	24.8838
1181	-0.0261069	41.3317	18.0687	17.1067	5.2389	13.7294	20.1076	0.517437	0.972343	24.8572
1182	-0.023325	41.2946	18.049	17.0884	5.235	13.7135	20.0882	0.522175	0.972334	24.8307
1183	-0.0205436	41.2575	18.0293	17.0702	5.23111	13.6976	20.0689	0.526971	0.97232	24.8042
1184	-0.0177626	41.2205	18.0097	17.0521	5.22723	13.6817	20.0496	0.531833	0.972302	24.7777
1185	-0.0150423	41.1836	17.99	17.0342	5.22336	13.6658	20.0304	0.536771	0.97228	24.7512
1186	-0.0123812	41.1468	17.9704	17.0164	5.2195	13.65	20.0112	0.541799	0.972254	24.7248
1187	-0.00977803	41.1101	17.9508	16.9986	5.21566	13.6341	19.9921	0.546931	0.972224	24.6984
1188	-0.00723131	41.0734	17.9312	16.981	5.21183	13.6183	19.973	0.552189	0.972189	24.672
1189	-0.00473968	41.0369	17.9116	16.9635	5.208	13.6025	19.9539	0.55761	0.97215	24.6456
1190	-0.00230178	41.0004	17.892	16.9461	5.20419	13.5867	19.9349	0.56323	0.972107	24.6193
1191	8.37212e-05	40.964	17.8724	16.9288	5.20038	13.5709	19.916	28.7045	0.97206	24.5929
1192	0.00241814	40.9276	17.8529	16.9115	5.19659	13.5551	19.8971	28.675	0.972008	24.5666
1193	0.00470275	40.8914	17.8333	16.8944	5.1928	13.5394	19.8782	28.6455	0.971953	24.5403
1194	0.00693883	40.8552	17.8138	16.8773	5.18902	13.5237	19.8594	28.616	0.971893	24.5141
1195	0.00912761	40.8191	17.7943	16.8603	5.18525	13.508	19.8407	28.5866	0.97183	24.4878
1196	0.0112188	40.783	17.7748	16.8434	5.18148	13.4923	19.8219	28.5572	0.971762	24.4616
1197	0.0132164	40.7471	17.7553	16.8265	5.17773	13.4766	19.8033	28.5279	0.97169	24.4354
1198	0.0151246	40.7112	17.7358	16.8097	5.17397	13.4609	19.7846	28.4988	0.971615	24.4093
1199	0.016947	40.6753	17.7164	16.793	5.17023	13.4453	19.766	28.4699	0.971535	24.3831
1200	0.0186875	40.6396	17.6969	16.7763	5.16649	13.4297	19.7475	28.441	0.971451	24.357
1201	0.0203495	40.6039	17.6775	16.7598	5.16276	13.4141	19.729	28.4124	0.971363	24.3309
1202	0.0219365	40.5682	17.6581	16.7432	5.15903	13.3985	19.7105	28.3838	0.971272	24.3048
1203	0.0234516	40.5327	17.6387	16.7267	5.15531	13.3829	19.6921	28.3554	0.971176	24.2787
1204	0.024898	40.4972	17.6193	16.7103	5.1516	13.3674	19.6737	28.3271	0.971076	24.2527
1205	0.0262788	40.4617	17.5999	16.694	5.14789	13.3518	19.6553	28.2989	0.970973	24.2267
1206	0.0275966	40.4264	17.5806	16.6776	5.14418	13.3363	19.637	28.2708	0.970865	24.2007
1207	0.0288543	40.3911	17.5612	16.6614	5.14048	13.3208	19.6188	28.2429	0.970754	24.1747
1208	0.0300545	40.3558	17.5419	16.6452	5.13679	13.3053	19.6005	28.215	0.970607	24.1488
1209	0.0311996	40.3206	17.5226	16.629	5.13309	13.2898	19.5823	28.1873	0.970427	24.1228
1210	0.032292	40.2855	17.5033	16.6129	5.12941	13.2744	19.5642	28.1596	0.970216	24.0969
1211	0.0333339	40.2504	17.484	16.5968	5.12572	13.2589	19.5461	28.132	0.969975	24.0709
1212	0.0343275	40.2154	17.4648	16.5808	5.12204	13.2435	19.528	28.1046	0.969704	24.045
1213	0.0352749	40.1804	17.4455	16.5648	5.11836	13.2281	19.51	28.0772	0.969406	24.0191
1214	0.036178	40.1456	17.4263	16.5488	5.11469	13.2127	19.4919	28.0499	0.969083	23.9932
1215	0.0370388	40.1107	17.4071	16.5329	5.11102	13.1974	19.474	28.0227	0.968734	23.9673
1216	0.0378589	40.0759	17.3879	16.517	5.10735	13.182	19.456	27.9955	0.968361	23.9414
1217	0.03864	40.0412	17.3687	16.5012	5.10369	13.1667	19.438	27.9685	0.967965	23.9156
1218	0.0393839	40.0065	17.3495	16.4854	5.10003	13.1513	19.4201	27.9415	0.967548	23.8897
1219	0.040092	39.9719	17.3304	16.4696	5.09637	13.136	19.4022	27.9146	0.96711	23.8639
1220	0.0407659	39.9373	17.3113	16.4539	5.09271	13.1207	19.3844	27.8878	0.966653	23.838
1221	0.0414069	39.9028	17.2921	16.4382	5.08906	13.1055	19.3666	27.861	0.966176	23.8122
1222	0.0420163	39.8684	17.273	16.4225	5.0854	13.0902	19.3489	27.8344	0.965681	23.7864
1223	0.0425955	39.834	17.254	16.4068	5.08175	13.075	19.3311	27.8077	0.965169	23.7606
1224	0.0431457	39.7996	17.2349	16.3912	5.07811	13.0598	19.3134	27.7812	0.96464	23.7348
1225	0.043668	39.7653	17.2158	16.3757	5.07446	13.0445	19.2958	27.7547	0.964096	23.709
1226	0.0441635	39.731	17.1968	16.3601	5.07082	13.0294	19.2782	27.7283	0.963536	23.6832
1227	0.0446334	39.6968	17.1778	16.3446	5.06718	13.0142	19.2606	27.7019	0.962962	23.6575
1228	0.0450786	39.6627	17.1587	16.3291	5.06354	12.999	19.243	27.6756	0.962374	23.6318
1229	0.0455001	39.6286	17.1397	16.3136	5.0599	12.9839	19.2255	27.6493	0.961772	23.606
1230	0.0458987	39.5945	17.1207	16.2982	5.05626	12.9688	19.208	27.6231	0.961157	23.5803
1231	0.0462755	39.5605	17.1017	16.2828	5.05271	12.9537	19.1905	27.597	0.960531	23.5547
1232	0.0466312	39.5266	17.0827	16.2674	5.04924	12.9386	19.173	27.5709	0.959892	23.529
1233	0.0469666	39.4926	17.0638	16.252	5.04586	12.9235	19.1556	27.5449	0.959242	23.5033
1234	0.0472826	39.4588	17.0448	16.2367	5.04254	12.9084	19.1382	27.5189	0.958581	23.4777
1235	0.0475797	39.425	17.0258	16.2214	5.0393	12.8934	19.1209	27.493	0.95791	23.452
1236	0.0478589	39.3912	17.0069	16.2061	5.03612	12.8784	19.1035	27.4671	0.957229	23.4264
1237	0.0481206	39.3575	16.988	16.1908	5.03301	12.8633	19.0862	27.4413	0.956538	23.4008
1238	0.0483655	39.3238	16.969	16.1755	5.02996	12.8484	19.0689	27.4155	0.955837	23.3753
1239	0.0485943	39.2901	16.9501	16.1603	5.02696	12.8334	19.0517	27.3898	0.955128	23.3497
1240	0.0488076	39.2565	16.9312	16.1451	5.02403	12.8184	19.0344	27.3641	0.95441	23.3242
1241	0.0490058	39.223	16.9123	16.1299	5.02114	12.8035	19.0172	27.3384	0.953684	23.2986
1242	0.0491896	39.1895	16.8935	16.1148	5.01831	12.7885	19	27.3129	0.95295	23.2731
1243	0.0493594	39.156	16.8746	16.0996	5.01553	12.7736	18.9829	27.2873	0.952208	23.2476
1244	0.0495158	39.1226	16.8557	16.0845	5.01279	12.7587	18.9657	27.2618	0.951458	23.2222
1245	0.0496591	39.0893	16.8369	16.0694	5.01009	12.7438	18.9486	27.2363	0.950702	23.1967
1246	0.0497899	39.0559	16.8181	16.0543	5.00744	12.729	18.9315	27.2109	0.949938	23.1713
1247	0.0499086	39.0226	16.7993	16.0393	5.00483	12.7141	18.9144	27.1855	0.949168	23.1458
1248	0.0500156	38.9894	16.7805	16.0242	5.00226	12.6993	18.8974	27.1602	0.948391	23.1204
1249	0.0501113	38.9562	16.7617	16.0092	4.99973	12.6845	18.8804	27.1349	0.947608	23.0951
1250	0.050196	38.923	16.7429	15.9942	4.9973	12.6697	18.8633	27.1096	0.946799	23.0697
1251	0.0502702	38.8899	16.7242	15.9792	4.99497	12.6549	18.8464	27.0844	0.945965	23.0443
1252	0.0503341	38.8568	16.7055	15.9642	4.99272	12.6401	18.8294	27.0592	0.945107	23.019
1253	0.0503881	38.8238	16.6867	15.9493	4.99057	12.6254	18.8124	27.0341	0.944226	22.9937
1254	0.0504326	38.7908	16.668	15.9344	4.9885	12.6106	18.7955	27.009	0.943325	22.9684
1255	0.0504678	38.7579	16.6493	15.9194	4.9865	12.5959	18.7786	26.9839	0.942404	22.9431
1256	0.050494	38.725	16.6306	15.9045	4.98458	12.5812	18.7617	26.9589	0.941464	22.9179
1257	0.0505115	38.6921	16.612	15.8897	4.98273	12.5665	18.7448	26.9339	0.940506	22.8927
1258	0.0505206	38.6592	16.5933	15.8748	4.98095	12.5518	18.728	26.9089	0.939532	22.8675
1259	0.0505215	38.6264	16.5746	15.8599	4.97924	12.5372	18.7111	26.884	0.938542	22.8423
1260	0.0505145	38.5937	16.556	15.8451	4.97759	12.5226	18.6943	26.8591	0.937537	22.8171
1261	0.0504998	38.561	16.5374	15.8303	4.976	12.5079	18.6776	26.8342	0.936518	22.7919
1262	0.0504777	38.5283	16.5187	15.8155	4.97446	12.4933	18.6609	26.8094	0.935485	22.7668
1263	0.0504483	38.4957	16.5001	15.8007	4.97299	12.4787	18.6443	26.7846	0.93444	22.7417
1264	0.0504119	38.4631	16.4815	15.7859	4.97157	12.4642	18.6278	26.7599	0.933383	22.7166
1265	0.0503687	38.4305	16.463	15.7711	4.97013	12.4496	18.6113	26.7351	0.932314	22.6915
1266	0.0503188	38.398	16.4444	15.7564	4.96867	12.4351	18.595	26.7104	0.931235	22.6665
1267	0.0502626	38.3655	16.4258	15.7417	4.9672	12.4205	18.5786	26.6858	0.930145	22.6415
1268	0.0502	38.333	16.4073	15.727	4.96571	12.406	18.5624	26.6612	0.929046	22.6165
1269	0.0501314	38.3006	16.3888	15.7123	4.9642	12.3915	18.5462	26.6366	0.927937	22.5915
1270	0.0500569	38.2683	16.3703	15.6976	4.96268	12.377	18.5301	26.612	0.92682	22.5665
1271	0.0499766	38.2359	16.3518	15.6829	4.96115	12.3626	18.514	26.5875	0.925695	22.5416
1272	0.0498908	38.2036	16.3333	15.6682	4.9596	12.3481	18.498	26.563	0.924562	22.5166
1273	0.0497994	38.1713	16.3148	15.6536	4.95804	12.3337	18.482	26.5385	0.923421	22.4917
1274	0.0497028	38.1391	16.2964	15.639	4.95647	12.3193	18.4661	26.514	0.922274	22.4668
1275	0.049601	38.1069	16.2779	15.6243	4.95488	12.3049	18.4502	26.4896	0.921119	22.442
1276	0.0494942	38.0748	16.2595	15.6097	4.95328	12.2905	18.4344	26.4652	0.919959	22.4171
1277	0.0493825	38.0427	16.2411	15.5951	4.95167	12.2761	18.4187	26.4409	0.918792	22.3923
1278	0.049266	38.0106	16.2227	15.5806	4.95005	12.2618	18.403	26.4165	0.917619	22.3675
1279	0.0491448	37.9785	16.2043	15.566	4.94842	12.2475	18.3873	26.3922	0.916442	22.3427
1280	0.0490191	37.9465	16.186	15.5515	4.94677	12.2331	18.3717	26.368	0.915259	22.318
1281	0.0488889	37.9145	16.1676	15.5369	4.94512	12.2188	18.3562	26.3437	0.914071	22.2933
1282	0.0487545	37.8824	16.1493	15.5224	4.94345	12.2045	18.3406	26.3195	0.912878	22.2685
1283	0.0486158	37.8504	16.131	15.5079	4.94178	12.1903	18.3252	26.2953	0.911681	22.2439
1284	0.0484729	37.8183	16.1127	15.4934	4.94009	12.176	18.3098	26.2712	0.910479	22.2192
1285	0.0483261	37.7863	16.0945	15.4789	4.9384	12.1618	18.2944	26.247	0.909274	22.1945
1286	0.0481753	37.7542	16.0762	15.4644	4.9367	12.1476	18.2791	26.2229	0.908065	22.1699
1287	0.0480207	37.7221	16.058	15.4499	4.93498	12.1333	18.2638	26.1989	0.906852	22.1453
1288	0.0478623	37.6901	16.0397	15.4355	4.93326	12.1191	18.2486	26.1748	0.905635	22.1207
1289	0.0477002	37.658	16.0215	15.421	4.93153	12.105	18.2335	26.1508	0.904415	22.0962
1290	0.0475346	37.6259	16.0034	15.4066	4.9298	12.0908	18.2183	26.1268	0.903192	22.0716
1291	0.0473654	37.5938	15.9852	15.3922	4.92805	12.0767	18.2033	26.1028	0.901966	22.0471
1292	0.0471928	37.5617	15.967	15.3778	4.9263	12.0625	18.1882	26.0789	0.900738	22.0226
1293	0.0470168	37.5296	15.9489	15.3634	4.92454	12.0484	18.1732	26.0549	0.899506	21.9981
1294	0.0468375	37.4975	15.9308	15.349	4.92277	12.0343	18.1583	26.031	0.898272	21.9737
1295	0.0466551	37.4654	15.9127	15.3346	4.92099	12.0202	18.1434	26.0072	0.897035	21.9493
1296	0.0464694	37.4333	15.8946	15.3203	4.91921	12.0061	18.1286	25.9833	0.895796	21.9249
1297	0.0462807	37.4012	15.8765	15.3059	4.91742	11.9921	18.1138	25.9595	0.894554	21.9005
1298	0.0460889	37.369	15.8585	15.2916	4.91562	11.978	18.0991	25.9357	0.893311	21.8761
1299	0.0458942	37.3369	15.8404	15.2773	4.91381	11.964	18.0844	25.9119	0.892065	21.8518
1300	0.0456965	37.3048	15.8224	15.263	4.912	11.95	18.0697	25.8882	0.890818	21.8275
1301	0.045496	37.2727	15.8044	15.2487	4.91018	11.936	18.0552	25.8645	0.889568	21.8032
1302	0.0452927	37.2406	15.7865	15.2344	4.90836	11.922	18.0406	25.8408	0.888317	21.7789
1303	0.0450867	37.2085	15.7685	15.2201	4.90653	11.9081	18.0262	25.8171	0.887064	21.7546
1304	0.0448779	37.1764	15.7506	15.2058	4.90463	11.8941	18.0117	25.7934	0.885809	21.7304
1305	0.0446666	37.1443	15.7326	15.1916	4.90266	11.8802	17.9974	25.7698	0.884553	21.7062
1306	0.0444526	37.1122	15.7147	15.1773	4.90063	11.8663	17.9831	25.7462	0.883295	21.682
1307	0.0442361	37.0801	15.6968	15.1631	4.89854	11.8524	17.9689	25.7226	0.882036	21.6579
1308	0.0440171	37.048	15.679	15.1488	4.8964	11.8385	17.9547	25.6991	0.880776	21.6337
1309	0.0437956	37.016	15.6611	15.1346	4.89421	11.8246	17.9406	25.6755	0.879514	21.6096
1310	0.0435717	36.9839	15.6433	15.1204	4.89196	11.8107	17.9266	25.652	0.878251	21.5855
1311	0.0433455	36.9518	15.6255	15.1062	4.88967	11.7969	17.9126	25.6285	0.876987	21.5614
1312	0.0431169	36.9198	15.6077	15.092	4.88733	11.7831	17.8988	25.6051	0.875721	21.5374
1313	0.0428861	36.8877	15.5899	15.0779	4.88495	11.7693	17.885	25.5816	0.874455	21.5133
1314	0.042653	36.8557	15.5721	15.0637	4.88253	11.7555	17.8713	25.5582	0.873188	21.4893
1315	0.0424177	36.8236	15.5544	15.0496	4.88008	11.7417	17.8577	25.5348	0.871919	21.4653
1316	0.0421802	36.7916	15.5366	15.0355	4.87759	11.7279	17.8442	25.5114	0.87065	21.4414
1317	0.0419406	36.7595	15.5189	15.0215	4.87506	11.7142	17.8309	25.4881	0.86938	21.4174
1318	0.0416989	36.7275	15.5012	15.0077	4.87251	11.7004	17.8177	25.4647	0.868109	21.3935
1319	0.0414551	36.6955	15.4836	14.9939	4.86992	11.6867	17.8046	25.4414	0.866837	21.3696
1320	0.0412093	36.6635	15.4659	14.9801	4.8673	11.673	17.7917	25.4182	0.865564	21.3457
1321	0.0409616	36.6315	15.4483	14.9665	4.86466	11.6593	17.7789	25.3949	0.864291	21.3218
1322	0.0407118	36.5996	15.4307	14.9529	4.862	11.6456	17.7663	25.3716	0.863016	21.298
1323	0.0404601	36.5676	15.4131	14.9395	4.85931	11.6319	17.7538	25.3484	0.861742	21.2742
1324	0.0402065	36.5356	15.3955	14.9261	4.85659	11.6183	17.7414	25.3252	0.860466	21.2504
1325	0.039951	36.5037	15.3779	14.9127	4.85386	11.6047	36.3521	25.302	0.85919	21.2266
1326	0.0396937	36.4717	15.3604	14.8994	4.85111	11.591	36.3128	25.2789	0.857914	21.2028
1327	0.0394346	36.4398	15.3428	14.8862	4.84833	11.5774	36.2735	25.2557	0.856637	21.1791
1328	0.0392975	36.4079	15.3253	14.8731	4.84554	11.5638	36.2343	25.2326	0.855359	21.1554
1329	0.0392762	36.376	15.3078	14.86	4.84273	11.5503	36.1952	25.2095	0.854081	21.1317
1330	0.0393648	36.3441	15.2903	14.847	4.8399	11.5367	36.1561	25.1864	0.852803	21.1081
1331	0.0395578	36.3122	15.2729	14.834	4.83706	11.5232	36.1171	25.1634	0.851524	21.0844
1332	0.0398499	36.2803	15.2554	14.8211	4.83421	11.5096	36.0783	25.1404	0.850244	21.0608
1333	0.0402362	36.2485	15.238	14.8082	4.83133	11.4961	36.0396	25.1173	0.848965	21.0372
1334	0.0407119	36.2166	15.2206	14.7954	4.82845	11.4826	36.0011	25.0943	0.847685	21.0136
1335	0.0412727	36.1848	15.2032	14.7827	4.82555	11.4691	35.9627	25.0714	0.846404	20.9901
1336	0.0419144	36.153	15.1859	14.77	4.82264	11.4556	35.9244	25.0484	0.845123	20.9666
1337	0.0426328	36.1212	15.1685	14.7574	4.81972	11.4422	35.8862	25.0255	0.843842	20.943
1338	0.0434244	36.0894	15.1512	14.7448	4.81679	11.4287	35.8482	25.0026	0.842561	20.9196
1339	0.0442855	36.0576	15.1339	14.7322	4.81385	11.4153	35.8102	24.9797	0.84128	20.8961
1340	0.0452127	36.0259	15.1166	14.7197	4.8109	11.4019	35.7724	24.9568	0.839998	20.8727
1341	0.0462029	35.9941	15.0993	14.7073	4.80793	11.3885	35.7347	24.9339	0.838716	20.8492
1342	0.0472529	35.9624	15.082	14.6949	4.80496	11.3751	35.6971	24.9111	0.837434	20.8259
1343	0.04836	35.9307	15.0648	14.6825	4.80198	11.3617	35.6595	24.8883	0.836151	20.8025
1344	0.0495213	35.899	15.0475	14.6702	4.79899	11.3484	35.6221	24.8655	0.834869	20.7791
1345	0.0507344	35.8673	15.0303	14.658	4.796	11.3351	35.5847	24.8427	0.833586	20.7558
1346	0.0519966	35.8356	15.0131	14.6458	4.79299	11.3217	35.5475	24.82	0.832303	20.7325
1347	0.0533057	35.8039	14.996	14.6336	4.78998	11.3084	35.5103	24.7972	0.83102	20.7092
1348	0.0546595	35.7723	14.9788	14.6214	4.78696	11.2951	35.4732	24.7745	0.829737	20.686
1349	0.0560558	35.7407	14.9617	14.6093	4.78393	11.2818	35.4361	24.7518	0.828454	20.6628
1350	0.0574927	35.709	14.9445	14.5973	4.7809	11.2686	35.3992	24.7291	0.827171	20.6395
1351	0.0589682	35.6775	14.9274	14.5853	4.77786	11.2553	35.3623	24.7065	0.825888	20.6164
1352	0.0604805	35.6459	14.9104	14.5733	4.77481	11.2421	35.3255	24.6838	0.824605	20.5932
1353	0.0620279	35.6143	14.8933	14.5614	4.77176	11.2288	35.2888	24.6612	0.823321	20.5701
1354	0.0636087	35.5828	14.8762	14.5495	4.76866	11.2156	35.2521	24.6386	0.822038	20.5469
1355	0.0652214	35.5512	14.8592	14.5376	4.76552	11.2024	35.2155	24.616	0.820755	20.5238
1356	0.0668644	35.5197	14.8422	14.5258	4.76233	11.1892	35.179	24.5934	0.819472	20.5008
1357	0.0685363	35.4882	14.8252	14.5141	4.7591	11.1761	35.1425	24.5709	0.818188	20.4777
1358	0.0702359	35.4567	14.8082	14.5023	4.75584	11.1629	35.1061	24.5483	0.816905	20.4547
1359	0.0719617	35.4253	14.7913	14.4906	4.75254	11.1498	35.0698	24.5258	0.815622	20.4317
1360	0.0737126	35.3938	14.7743	14.479	4.74921	11.1367	35.0335	24.5033	0.814339	20.4087
1361	0.0754873	35.3624	14.7574	14.4674	4.74586	11.1235	34.9972	24.4808	0.813056	20.3858
1362	0.0772847	35.331	14.7405	14.4558	4.74247	11.1104	34.9611	24.4584	0.811773	20.3628
1363	0.0791038	35.2996	14.7236	14.4442	4.73905	11.0974	34.9249	24.4359	0.81049	20.3399
1364	0.0809436	35.2682	14.7067	14.4327	4.73561	11.0843	34.8889	24.4135	0.809207	20.317
1365	0.0828029	35.2369	14.6898	14.4213	4.73215	11.0712	34.8529	24.3911	0.807925	20.2942
1366	0.084681	35.2055	14.673	14.4099	4.72867	11.0582	34.8169	24.3687	0.806642	20.2713
1367	0.0865768	35.1742	14.6562	14.3985	4.72517	11.0452	34.781	24.3463	0.80536	20.2485
1368	0.0884896	35.1429	14.6394	14.3871	4.72164	11.0322	34.7451	24.324	0.804077	20.2257
1369	0.0904184	35.1116	14.6226	14.3758	4.7181	11.0192	34.7093	24.3017	0.802795	20.2029
1370	0.0923626	35.0803	14.6058	14.3645	4.71455	11.0062	34.6736	24.2793	0.801513	20.1802
1371	0.0943213	35.0491	14.5891	14.3533	4.71098	10.9932	34.6379	24.257	0.800232	20.1575
1372	0.0962939	35.0178	14.5723	14.3421	4.70739	10.9803	34.6022	24.2347	0.79895	20.1348
1373	0.0982796	34.9866	14.5556	14.331	4.70379	10.9673	34.5666	24.2125	0.797669	20.1121
1374	0.100278	34.9554	14.5389	14.3198	4.70017	10.9544	34.531	24.1902	0.796387	20.0894
1375	0.102288	34.9242	14.5222	14.3088	4.69655	10.9415	34.4955	24.168	0.795106	20.0668
1376	0.104309	34.8931	14.5056	14.2977	4.69291	10.9286	34.46	24.1458	0.793826	20.0442
1377	0.106341	34.8619	14.4889	14.2867	4.68926	10.9157	34.4245	24.1236	0.792545	20.0216
1378	0.108382	34.8308	14.4723	14.2758	4.68561	10.9028	34.3891	24.1014	0.791265	19.999
1379	0.110434	34.7997	14.4557	14.2649	4.68194	10.89	34.3538	24.0792	0.789985	19.9765
1380	0.112494	34.7685	14.4391	14.254	4.67826	10.8771	34.3185	24.0571	0.788705	19.954
1381	0.114563	34.7374	14.4225	14.2432	4.67458	10.8643	34.2832	24.035	0.787425	19.9315
1382	0.116639	34.7063	14.406	14.2324	4.67088	10.8515	34.248	24.0128	0.786146	19.909
1383	0.118724	34.6752	14.3894	14.2217	4.66718	10.8387	34.2128	23.9907	0.784867	19.8865
1384	0.120815	34.644	14.3729	14.211	4.66348	10.8259	34.1776	23.9687	0.783588	19.8641
1385	0.122913	34.6129	14.3564	14.2004	4.65976	10.8131	34.1425	23.9466	0.78231	19.8417
1386	0.125017	34.5818	14.3399	14.1898	4.65604	10.8004	34.1074	23.9246	0.781032	19.8193
1387	0.127127	34.5507	14.3234	14.1792	4.65232	10.7876	34.0723	23.9025	0.779754	19.797
1388	0.129242	34.5197	14.3069	14.1687	4.64859	10.7749	34.0372	23.8805	0.778476	19.7746
1389	0.131363	34.4886	14.2905	14.1583	4.64485	10.7622	34.0021	23.8585	0.777199	19.7523
1390	0.133488	34.4575	14.2741	14.1479	4.64111	10.7495	33.967	23.8365	0.775922	19.73
1391	0.135618	34.4265	14.2577	14.1376	4.63736	10.7368	33.9319	23.8146	0.774646	19.7078
1392	0.137751	34.3954	14.2413	14.1274	4.63361	10.7241	33.8968	23.7926	0.773369	19.6855
1393	0.139889	34.3644	14.2249	14.1172	4.62986	10.7114	33.8616	23.7707	0.772094	19.6633
1394	0.14203	34.3334	14.2086	14.107	4.6261	10.6988	33.8265	23.7488	0.770818	19.6411
1395	0.144173	34.3024	14.1922	14.097	4.62234	10.6861	33.7913	23.7269	0.769543	19.6189
1396	0.14632	34.2714	14.1759	14.087	4.61857	10.6735	33.7561	23.705	0.768268	19.5968
1397	0.148548	34.2404	14.1596	14.0771	4.6148	10.6609	33.7209	23.6831	0.766994	19.5746
1398	0.150852	34.2094	14.1433	14.0673	4.61103	10.6483	33.6856	23.6612	0.76572	19.5525
1399	0.15323	34.1785	14.127	14.0575	4.60725	10.6357	33.6504	23.6394	0.764446	19.5305
1400	0.155678	34.1475	14.1108	14.0479	4.60348	10.6232	33.6152	23.6176	0.763173	19.5084
1401	0.158193	34.1166	14.0946	14.0384	4.5997	10.6106	33.5799	23.5958	0.7619	19.4863
1402	0.16077	34.0857	14.0783	14.0289	4.59591	10.5981	33.5447	23.574	0.760628	19.4643
1403	0.163409	34.0548	14.0621	14.0197	4.59213	10.5856	33.5095	23.5522	0.759356	19.4423
1404	0.166106	34.0239	14.046	14.0105	4.58834	10.573	33.4743	23.5303	0.758084	19.4204
1405	0.168858	33.993	14.0298	14.0016	4.58465	10.5605	33.4391	23.5083	0.756813	19.3984
1406	0.171663	33.9622	14.0136	13.9928	4.58104	10.5481	33.4039	23.4862	0.755542	19.3765
1407	0.17452	33.9314	13.9975	13.9843	4.57751	10.5356	33.3687	23.4641	0.754272	19.3546
1408	0.177425	33.9005	13.9814	36.8135	4.57406	10.5231	33.3335	23.4419	0.753002	19.3327
1409	0.180377	33.8697	13.9653	36.774	4.57068	10.5107	33.2983	23.4196	0.751733	19.3108
1410	0.183375	33.8389	13.9492	36.7345	4.56736	10.4983	33.2632	23.3973	0.750464	19.289
1411	0.186417	33.8082	13.9331	36.695	4.56411	10.4858	33.228	23.3749	0.749196	19.2672
1412	0.1895	33.7774	13.9171	36.6556	4.56091	10.4734	33.1929	23.3524	0.747928	19.2455
1413	0.192624	33.7467	13.901	36.6162	4.55775	10.4611	33.1578	23.3299	0.74666	19.2241
1414	0.195788	33.716	13.885	36.5769	4.55465	10.4487	33.1227	23.3074	0.745393	19.2027
1415	0.198989	33.6853	13.869	36.5378	4.55159	10.4363	33.0876	23.2848	0.744127	19.1815
1416	0.202227	33.6546	13.8531	36.4987	4.54858	10.424	33.0526	23.2622	0.742861	19.1604
1417	0.205501	33.6239	13.8371	36.4597	4.5456	10.4116	33.0176	23.2395	0.741596	19.1395
1418	0.208809	33.5933	13.8211	36.4208	4.54265	10.3993	32.9826	23.2168	0.740331	19.1187
1419	0.212151	33.5627	13.8052	36.382	4.53974	10.387	32.9476	23.1941	0.739066	19.098
1420	0.215526	33.5321	13.7893	36.3433	4.53686	10.3747	32.9126	23.1713	0.737802	19.0774
1421	0.218933	33.5015	13.7734	36.3046	4.53401	10.3624	32.8777	23.1485	0.736539	19.0569
1422	0.222371	33.4709	13.7575	36.266	4.53119	10.3502	32.8428	23.1257	0.735276	19.0365
1423	0.22584	33.4404	13.7416	36.2275	4.52839	10.3379	32.8079	23.1029	0.734014	19.0161
1424	0.229338	33.4099	13.7258	36.189	4.52561	10.3257	32.773	23.08	0.732752	18.9959
1425	0.232866	33.3794	13.71	36.1506	4.52286	10.3134	32.7382	23.0571	0.731491	18.9758
1426	0.236423	33.3489	13.6941	36.1123	4.52012	10.3012	32.7034	23.0342	0.73023	18.9557
1427	0.240008	33.3184	13.6783	36.074	4.51741	10.289	32.6686	23.0112	0.72897	18.9358
1428	0.243621	33.288	13.6626	36.0358	4.51471	10.2768	32.6339	22.9883	0.727711	18.9159
1429	0.247261	33.2575	13.6468	35.9977	4.51202	10.2646	32.5991	22.9653	0.726452	18.896
1430	0.250928	33.2271	13.631	35.9596	4.50936	10.2525	32.5644	22.9423	0.725194	18.8763
1431	0.254623	33.1967	13.6153	35.9216	4.5067	10.2403	32.5298	22.9193	0.723936	18.8566
1432	0.258344	33.1664	13.5996	35.8836	4.50402	10.2282	32.4951	22.8963	0.722679	18.8369
1433	0.262091	33.136	13.5839	35.8457	4.5013	10.2161	32.4605	22.8733	0.721422	18.8174
1434	0.265865	33.1057	13.5682	35.8079	4.49856	10.204	32.4259	22.8503	0.720166	18.7979
1435	0.269665	33.0754	13.5525	35.7701	4.49579	10.1919	32.3914	22.8273	0.718911	18.7784
1436	0.273491	33.0451	13.5369	35.7324	4.493	10.1798	32.3568	22.8042	0.717656	18.759
1437	0.277344	33.0149	13.5213	35.6947	4.49019	10.1677	32.3223	22.7812	0.716402	18.7396
1438	0.281223	32.9846	13.5056	35.657	4.48735	10.1557	32.2879	22.7582	0.715148	18.7203
1439	0.285128	32.9544	13.49	35.6195	4.4845	10.1436	32.2534	22.7351	0.713896	18.7011
1440	0.289059	32.9242	13.4745	35.5819	4.48163	10.1316	32.219	22.7121	0.712643	18.6819
1441	0.293018	32.894	13.4589	35.5445	4.47874	10.1196	32.1846	22.689	0.711392	18.6627
1442	0.297004	32.8639	13.4433	35.507	4.47583	10.1076	32.1503	22.666	0.710141	18.6436
1443	0.301017	32.8338	13.4278	35.4697	4.47291	10.0956	32.116	22.6429	0.708891	18.6245
1444	0.305057	32.8037	13.4123	35.4323	4.46998	10.0836	32.0817	22.6199	0.707641	18.6055
1445	0.309127	32.7736	13.3968	35.3951	4.46703	10.0716	32.0474	22.5969	0.706392	18.5865
1446	0.313225	32.7435	13.3813	35.3578	4.46407	10.0597	32.0132	22.5738	0.705144	18.5675
1447	0.317352	32.7135	13.3658	35.3206	4.4611	10.0477	31.979	22.5508	0.703896	18.5486
1448	0.321509	32.6834	13.3504	35.2835	4.45812	10.0358	31.9448	22.5278	0.702649	18.5297
1449	0.325698	32.6534	13.3349	35.2464	4.45512	10.0239	31.9107	22.5047	0.701403	18.5108
1450	0.329918	32.6235	13.3195	35.2094	4.45212	10.012	31.8765	22.4817	0.700157	18.492
1451	0.334171	32.5935	13.3041	35.1724	4.44911	10.0001	31.8425	22.4587	0.698912	18.4732
1452	0.338458	32.5636	13.2887	35.1354	4.44609	9.98822	31.8084	22.4357	0.697668	18.4545
1453	0.34278	32.5337	13.2733	35.0985	4.44306	9.97636	31.7744	22.4127	0.696425	18.4357
1454	0.347139	32.5038	13.258	35.0616	4.44003	9.96451	31.7404	22.3897	0.695173	18.4171
1455	0.351536	32.4739	13.2426	35.0248	4.43698	9.95268	31.7065	22.3667	0.693912	18.3984
1456	0.355973	32.4441	13.2273	34.988	4.43393	9.94085	31.6725	22.3438	0.692644	18.3798
1457	0.360452	32.4142	13.212	34.9513	4.43088	9.92904	31.6386	22.3208	0.691367	18.3611
1458	0.364975	32.3844	13.1967	34.9146	4.42781	9.91725	31.6048	22.2979	0.690084	18.3426
1459	0.369545	32.3547	13.1814	34.8779	4.42474	9.90546	31.5709	22.2749	0.688794	18.324
1460	0.374164	32.3249	13.1662	34.8413	4.42163	9.89369	31.5371	22.252	0.687497	18.3055
1461	0.378836	32.2952	13.1509	34.8048	4.41848	9.88193	31.5034	22.2291	0.686194	18.287
1462	0.383565	32.2654	13.1357	34.7682	4.41529	9.87018	31.4696	22.2061	0.684885	18.2685
1463	0.388354	32.2357	13.1205	34.7317	4.41207	9.85844	31.4359	22.1833	0.683571	18.2501
1464	0.393209	32.206	13.1053	34.6953	4.40882	9.84672	31.4022	22.1604	0.682251	18.2316
1465	0.398136	32.1764	13.0901	34.6589	4.40554	9.83501	31.3686	22.1375	0.680925	18.2132
1466	0.403142	32.1467	13.0749	34.6225	4.40224	9.82332	31.335	22.1146	0.679595	18.1948
1467	0.408234	32.1171	13.0598	34.5862	4.39891	9.81163	31.3014	22.0918	0.678261	18.1765
1468	0.413424	32.0875	13.0447	34.5499	4.39555	9.79996	31.2679	22.069	0.676922	18.1582
1469	0.418722	32.0579	13.0295	34.5136	4.39218	9.7883	31.2343	22.0461	0.675579	18.1398
1470	0.424146	32.0284	13.0144	34.4774	4.38879	9.77666	31.2008	22.0233	0.674232	18.1216
1471	0.429714	31.9989	12.9993	34.4413	4.38538	9.76502	31.1674	22.0005	0.672881	18.1033
1472	0.435466	31.9693	12.9843	34.4051	4.38195	9.7534	31.134	21.9778	0.671526	18.085
1473	0.441437	31.9398	12.9692	34.369	4.37851	9.74179	31.1006	21.955	0.670169	18.0668
1474	0.447681	31.9104	12.9542	34.333	4.37505	9.7302	31.0672	21.9322	0.668808	18.0486
1475	23.9106	31.8809	12.9391	34.2969	4.37159	9.71861	31.0339	21.9095	0.667444	18.0304
1476	23.8845	31.8515	12.9241	34.261	4.3681	9.70704	31.0006	21.8868	0.666077	18.0123
1477	23.8585	31.8221	12.9091	34.225	4.36461	9.69548	30.9673	21.8641	0.664707	17.9941
1478	23.8324	31.7927	12.8941	34.1891	4.36111	9.68394	30.9341	21.8414	0.663335	17.976
1479	23.8064	31.7633	12.8791	34.1532	4.3576	9.6724	30.9008	21.8187	0.661961	17.9579
1480	23.7805	31.734	12.8642	34.1174	4.35408	9.66088	30.8677	21.7961	0.660584	17.9398
1481	23.7547	31.7047	12.8493	34.0816	4.35055	9.64937	30.8345	21.7734	0.659205	17.9217
1482	23.7292	31.6754	12.8343	34.0458	4.34701	9.63788	30.8014	21.7508	0.657824	17.9037
1483	23.7039	31.6461	12.8194	34.0101	4.34347	9.6264	30.7683	21.7282	0.656441	17.8856
1484	23.6788	31.6168	12.8045	33.9744	4.33992	9.61492	30.7353	21.7056	0.655057	17.8676
1485	23.6539	31.5876	12.7896	33.9387	4.33636	9.60347	30.7022	21.683	0.653671	17.8496
1486	23.6291	31.5584	12.7748	33.9031	4.3328	9.59202	30.6693	21.6605	0.652283	17.8316
1487	23.6046	31.5292	12.7599	33.8675	4.32923	9.58059	30.6363	21.6379	0.650894	17.8137
1488	23.5802	31.5	12.7451	33.832	4.32566	9.56916	30.6034	21.6154	0.649504	17.7957
1489	23.556	31.4709	12.7303	33.7965	4.32208	9.55776	30.5705	21.5929	0.648113	17.7778
1490	23.532	31.4418	12.7155	33.761	4.3185	9.54636	30.5376	21.5704	0.64672	17.7599
1491	23.508	31.4127	12.7007	33.7255	4.31491	9.53497	30.5048	21.5479	0.645326	17.742
1492	23.4843	31.3836	12.6859	33.6901	4.31132	9.5236	30.472	21.5255	0.643932	17.7241
1493	23.4607	31.3546	12.6712	33.6548	4.30773	9.51224	30.4392	21.503	0.642536	17.7063
1494	23.4372	31.3255	12.6564	33.6194	4.30413	9.5009	30.4064	21.4806	0.64114	17.6884
1495	23.4138	31.2965	12.6417	33.5841	4.30053	9.48956	30.3737	21.4582	0.639743	17.6706
1496	23.3906	31.2676	12.627	33.5488	4.29693	9.47824	30.341	21.4358	0.638346	17.6528
1497	23.3675	31.2386	12.6123	33.5136	4.29332	9.46693	30.3084	21.4135	0.636948	17.635
1498	23.3445	31.2097	12.5976	33.4784	4.28971	9.45563	30.2758	21.3911	0.635549	17.6172
1499	23.3216	31.1808	12.583	33.4432	4.2861	9.44435	30.2432	21.3688	0.63415	17.5995
1500	23.2988	31.1519	12.5683	33.4081	4.28249	9.43307	30.2106	21.3465	0.632751	17.5817
1501	23.2761	31.123	12.5537	33.373	4.27888	9.42181	30.1781	21.3242	0.631351	17.564
1502	23.2535	31.0942	12.5391	33.3379	4.27526	9.41056	30.1456	21.3019	0.629951	17.5463
1503	23.2311	31.0654	12.5245	33.3029	4.27164	9.39932	30.1131	21.2796	0.628551	17.5286
1504	23.2087	31.0366	12.5099	33.2679	4.26802	9.3881	30.0807	21.2574	0.627151	17.5109
1505	23.1864	31.0078	12.4953	33.2329	4.2644	9.37689	30.0483	21.2352	0.625751	17.4932
1506	23.1642	30.979	12.4808	33.198	4.26078	9.36568	30.0159	21.213	0.624351	17.4756
1507	23.1421	30.9503	12.4662	33.1631	4.25715	9.35449	29.9836	21.1908	0.622951	17.458
1508	23.1201	30.9216	12.4517	33.1283	4.25353	9.34332	29.9513	21.1686	0.621551	17.4403
1509	23.0981	30.8929	12.4372	33.0937	4.2499	9.33215	29.919	21.1465	0.620151	17.4227
1510	23.0763	30.8643	12.4227	33.0592	4.24627	9.321	29.8867	21.1243	0.618746	17.4051
1511	23.0545	30.8357	12.4082	33.0249	4.24264	9.30986	29.8545	21.1022	0.617335	17.3876
1512	23.0328	30.8071	12.3937	32.9906	4.23901	9.29873	29.8223	21.0801	0.615919	17.37
1513	23.0112	30.7785	12.3793	32.9565	4.23538	9.28761	29.7902	21.058	0.614498	17.3525
1514	22.9896	30.7499	12.3649	32.9225	4.23175	9.2765	29.758	21.036	0.613073	17.3349
1515	22.9682	30.7214	12.3504	32.8886	4.22811	9.26541	29.7259	21.0139	0.611644	17.3174
1516	22.9468	30.6929	12.336	32.8548	4.22448	9.25433	29.6939	20.9919	0.610212	17.2999
1517	22.9254	30.6644	12.3216	32.8212	4.22085	9.24326	29.6618	20.9699	0.608775	17.2824
1518	22.9042	30.6359	12.3073	32.7876	4.21721	9.2322	29.6298	20.948	0.607335	17.265
1519	22.883	30.6075	12.2929	32.7541	4.21357	9.22115	29.5979	20.926	0.605892	17.2475
1520	22.8618	30.579	12.2786	32.7207	4.20994	9.21012	29.5659	20.904	0.604447	17.2301
1521	22.8408	30.5506	12.2642	32.6874	4.2063	9.1991	29.534	20.8821	0.602998	17.2126
1522	22.8198	30.5223	12.2499	32.6542	4.20266	9.18809	29.5021	20.8602	0.601547	17.1952
1523	22.7989	30.4939	12.2356	32.6211	4.19903	9.17709	29.4703	20.8383	0.600094	17.1778
1524	22.778	30.4656	12.2213	32.5881	4.19539	9.1661	29.4384	20.8165	0.598639	17.1604
1525	22.7572	30.4373	12.2071	32.5552	4.19175	9.15513	29.4066	20.7946	0.597182	17.1431
1526	22.7365	30.409	12.1928	32.5223	4.18811	9.14416	29.3749	20.7728	0.595723	17.1257
1527	22.7158	30.3808	12.1786	32.4895	4.18447	9.13321	29.3431	20.751	0.594262	17.1084
1528	22.6952	30.3525	12.1644	32.4568	4.18083	9.12227	29.3114	20.7292	0.5928	17.091
1529	22.6747	30.3243	12.1502	32.4242	4.17719	9.11134	29.2798	20.7074	0.591337	17.0737
1530	22.6542	30.2961	12.136	32.3916	4.17355	9.10043	29.2481	20.6857	0.589872	17.0564
1531	22.6338	30.268	12.1218	32.3591	4.16991	9.08952	29.2165	20.6639	0.588406	17.0391
1532	22.6134	30.2398	12.1076	32.3267	4.16627	9.07863	29.1849	20.6422	0.58694	17.0219
1533	22.5931	30.2117	12.0935	32.2943	4.16263	9.06775	29.1534	20.6205	0.585472	17.0046
1534	22.5729	30.1836	12.0794	32.262	4.15899	9.05688	29.1219	20.5989	0.584004	16.9874
1535	22.5527	30.1556	12.0652	32.2298	4.15534	9.04603	29.0904	20.5772	0.582535	16.9701
1536	22.5326	30.1275	12.0511	32.1977	4.1517	9.03518	29.0589	20.5556	0.581066	16.9529
1537	22.5126	30.0995	12.0371	32.1656	4.14806	9.02435	29.0275	20.5339	0.579596	16.9357
1538	22.4926	30.0715	12.023	32.1335	4.14442	9.01353	28.9961	20.5123	0.578126	16.9185
1539	22.4727	30.0435	12.0089	32.1016	4.14078	9.00272	28.9647	20.4908	0.576656	16.9014
1540	22.4529	30.0156	11.9949	32.0697	4.13714	8.99192	28.9333	20.4692	0.575186	16.8842
1541	22.4331	29.9877	11.9809	32.0378	4.13349	8.98113	28.902	20.4477	0.573715	16.867
1542	22.4134	29.9598	11.9669	32.006	4.12985	8.97036	28.8707	20.4262	0.572245	16.8499
1543	22.3937	29.9319	11.9529	31.9743	4.12621	8.9596	28.8395	20.4046	0.570774	16.8328
1544	22.3741	29.904	11.9389	31.9426	4.12257	8.94885	28.8083	20.3832	0.569304	16.8157
1545	22.3546	29.8762	11.9249	31.9109	4.11893	8.93811	28.7771	20.3617	0.567834	16.7986
1546	22.3352	29.8484	11.911	31.8794	4.11529	8.92738	28.7459	20.3403	0.566364	16.7815
1547	22.3158	29.8206	11.897	31.8478	4.11165	8.91666	28.7148	20.3188	0.564894	16.7644
1548	22.2965	29.7928	11.8831	31.8163	4.108	8.90596	28.6837	20.2974	0.563425	16.7474
1549	22.2773	29.7651	11.8692	31.7849	4.10436	8.89526	28.6526	20.276	0.561956	16.7304
1550	22.2581	29.7374	11.8553	31.7535	4.10072	8.88458	28.6216	20.2547	0.560488	16.7133
1551	22.2391	29.7097	11.8414	31.7222	4.09708	8.87391	28.5905	20.2333	0.559021	16.6963
1552	22.2201	29.682	11.8275	31.6909	4.09344	8.86326	28.5596	20.212	0.557553	16.6793
1553	22.2012	29.6544	11.8137	31.6597	4.0899	8.85261	28.5286	20.1907	0.556087	16.6623
1554	22.1824	29.6268	11.7999	31.6285	4.08646	8.84197	28.4977	20.1694	0.554621	16.6454
1555	22.1637	29.5992	11.786	31.5974	4.0831	8.83135	28.4668	20.1481	0.553156	16.6284
1556	22.1451	29.5716	11.7722	31.5663	4.07983	8.82074	28.4359	20.1269	0.551692	16.6115
1557	22.1267	29.544	11.7584	31.5353	4.07664	8.81014	28.4051	20.1057	0.550225	16.5945
1558	22.1083	29.5165	11.7447	31.5043	4.07351	8.79955	28.3743	20.0844	0.548754	16.5776
1559	22.0901	29.489	11.7309	31.4733	4.07045	8.78897	28.3435	20.0632	0.547282	16.5607
1560	22.072	29.4615	11.7171	31.4424	4.06746	8.77841	28.3127	20.0421	0.545807	16.5438
1561	22.054	29.4341	11.7034	31.4115	4.06452	8.76785	28.282	20.0209	0.54433	16.5269
1562	22.0363	29.4066	11.6897	31.3807	4.06163	8.75731	28.2513	19.9997	0.542851	16.5101
1563	22.0187	29.3792	11.676	31.3499	4.05879	8.74678	28.2206	19.9786	0.541371	16.4932
1564	22.0014	29.3518	11.6623	31.3192	4.056	8.73626	28.19	19.9574	0.539889	16.4764
1565	21.9844	29.3244	11.6486	31.2885	4.05325	8.72575	28.1594	19.9363	0.538406	16.4595
1566	45.4237	29.2971	11.635	31.2578	4.05055	8.71526	28.1288	19.9152	0.536922	16.4426
1567	45.3744	29.2698	11.6213	31.2272	4.04787	8.70477	28.0983	19.8941	0.535436	16.4257
1568	45.3252	29.2425	11.6077	31.1966	4.04524	8.6943	28.0678	19.873	0.53395	16.4088
1569	45.276	29.2152	11.5941	31.1661	4.04264	8.68384	28.0373	19.8519	0.532463	16.3918
1570	45.2269	29.1879	11.5804	31.1356	4.04006	8.67338	28.0068	19.8308	0.530976	16.3749
1571	45.1779	29.1607	11.5669	31.1051	4.03752	8.66294	27.9764	19.8097	0.529488	16.3579
1572	45.129	29.1335	11.5533	31.0747	4.035	8.65252	27.946	19.7887	0.528	16.341
1573	45.0802	29.1063	11.5397	31.0443	4.03251	8.6421	27.9156	19.7677	0.526512	16.324
1574	45.0316	29.0792	11.5262	31.014	4.03004	8.63169	27.8853	19.7467	0.525023	16.3071
1575	44.9832	29.052	11.5126	30.9836	4.02759	8.6213	27.855	19.7257	0.523534	16.2901
1576	44.935	29.0249	11.4991	30.9534	4.02516	8.61092	27.8247	19.7047	0.522046	16.2731
1577	44.8871	28.9978	11.4856	30.9231	4.02275	8.60055	27.7944	19.6837	0.520557	16.2561
1578	44.8394	28.9708	11.4721	30.8929	4.02036	8.59019	27.7642	19.6628	0.519069	16.2392
1579	44.7919	28.9437	11.4586	30.8628	4.01798	8.57984	27.734	19.6418	0.517582	16.2222
1580	44.7446	28.9167	11.4452	30.8327	4.01562	8.5695	27.7039	19.6209	0.516094	16.2052
1581	44.6975	28.8897	11.4317	30.8026	4.01327	8.55917	27.6737	19.6	0.514607	16.1882
1582	44.6506	28.8627	11.4183	30.7725	4.01094	8.54886	27.6436	19.5791	0.513121	16.1712
1583	44.6039	28.8358	11.4049	30.7425	4.00862	8.53856	27.6135	19.5583	0.511635	16.1543
1584	44.5574	28.8088	11.3915	30.7125	4.00631	8.52826	27.5835	19.5374	0.510149	16.1373
1585	44.511	28.7819	11.3781	30.6826	4.00401	8.51798	27.5535	19.5166	0.508665	16.1203
1586	44.4648	28.755	11.3647	30.6526	4.00172	8.50771	27.5235	19.4958	0.507181	16.1033
1587	44.4188	28.7282	11.3513	30.6228	3.99944	8.49745	27.4935	19.475	0.505698	16.0864
1588	44.3729	28.7013	11.338	30.5929	3.99716	8.48721	27.4636	19.4542	0.504216	16.0694
1589	44.3272	28.6745	11.3247	30.5631	3.9949	8.47697	27.4336	19.4334	0.502734	16.0524
1590	44.2816	28.6477	11.3113	30.5333	3.99264	8.46675	27.4038	19.4127	0.501254	16.0355
1591	44.2362	28.6209	11.298	30.5035	3.99039	8.45653	27.3739	19.392	0.499775	16.0185
1592	44.1909	28.5942	11.2847	30.4737	3.98815	8.44633	27.3441	19.3713	0.498296	16.0016
1593	44.1457	28.5675	11.2715	30.4438	3.98591	8.43614	27.3143	19.3506	0.496819	15.9846
1594	44.1007	28.5408	11.2582	30.414	3.98368	8.42596	27.2845	19.3299	0.495342	15.9677
1595	44.0558	28.5141	11.2449	30.3841	3.98145	8.41579	27.2548	19.3092	0.493867	15.9508
1596	44.011	28.4874	11.2317	30.3541	3.97922	8.40563	27.2251	19.2886	0.492393	15.9338
1597	43.9664	28.4608	11.2185	30.3242	3.977	8.39548	27.1954	19.2679	0.49092	15.9169
1598	43.9218	28.4342	11.2053	30.2943	3.97479	8.38535	27.1658	19.2473	0.489449	15.9
1599	43.8774	28.4076	11.1921	30.2643	3.97258	8.37522	27.1361	19.2267	0.487978	15.8831
1600	43.8331	28.381	11.1789	30.2343	3.97037	8.36511	27.1065	19.2062	0.486509	15.8662
1601	43.7889	28.3545	11.1657	30.2043	3.96816	8.35501	27.077	19.1856	0.485041	15.8493
1602	43.7449	28.3279	11.1526	30.1743	3.96595	8.34492	27.0474	19.1651	0.483575	15.8324
1603	43.7009	28.3014	11.1395	30.1443	3.96375	8.33484	27.0179	19.1445	0.48211	15.8156
1604	43.6571	28.275	11.1263	30.1143	3.96155	8.32477	26.9884	19.124	0.480646	15.7987
1605	43.6133	28.2485	11.1132	30.0843	3.95935	8.31471	26.959	19.1035	0.479183	15.7818
1606	43.5697	28.2221	11.1001	30.0542	3.95715	8.30466	26.9296	19.0831	0.477722	15.765
1607	43.5261	28.1957	11.087	30.0241	3.95496	8.29463	26.9002	19.0626	0.476262	15.7482
1608	43.4827	28.1693	11.074	29.9939	3.95276	8.2846	26.8708	19.0422	0.474804	15.7313
1609	43.4394	28.1429	11.0609	29.9637	3.95057	8.27459	26.8415	19.0218	0.473347	15.7145
1610	43.3961	28.1166	11.0479	29.9334	3.94838	8.26458	26.8122	19.0014	0.471892	15.6977
1611	43.353	28.0902	11.0349	29.9031	3.94618	8.25459	26.7829	18.981	0.470438	15.6809
1612	43.31	28.0639	11.0218	29.8728	3.94399	8.24461	26.7536	18.9607	0.468986	15.6641
1613	43.267	28.0377	11.0088	29.8425	3.9418	8.23464	26.7244	18.9403	0.467535	15.6474
1614	43.2242	28.0114	10.9959	29.8121	3.93961	8.22468	26.6952	18.92	0.466085	15.6306
1615	43.1815	27.9852	10.9829	29.7817	3.93741	8.21472	26.666	18.8997	0.464637	15.6138
1616	43.1388	27.959	10.9699	29.7513	3.93522	8.20478	26.6369	18.8795	0.463191	15.5971
1617	43.0963	27.9328	10.957	29.7208	3.93303	8.19485	26.6078	18.8592	0.461746	15.5804
1618	43.0538	27.9066	10.9441	29.6904	3.93083	8.18494	26.5787	18.839	0.460303	15.5636
1619	43.0114	27.8805	10.9311	29.6598	3.92872	8.17503	26.5496	18.8187	0.458861	15.5469
1620	42.9692	27.8544	10.9182	29.6293	3.92668	8.16513	26.5206	18.7985	0.457421	15.5302
1621	42.927	27.8283	10.9054	29.5987	3.92471	8.15524	26.4916	18.7784	0.455982	15.5136
1622	42.8849	27.8022	10.8925	29.5681	3.9228	8.14536	26.4626	18.7582	0.454545	15.4969
1623	42.8429	27.7761	10.8796	29.5374	3.92095	8.1355	26.4337	18.7381	0.45311	15.4802
1624	42.801	27.7501	10.8668	29.5067	3.91916	8.12564	26.4047	18.7179	0.451676	15.4636
1625	42.7592	27.7241	10.8539	29.476	3.91742	8.11579	26.3758	18.6978	0.450244	15.4469
1626	42.7175	27.6981	10.8411	29.4453	3.91573	8.10596	26.347	18.6778	0.448814	15.4303
1627	42.6759	27.6721	10.8283	29.4145	3.91409	8.09613	26.3181	18.6577	0.447385	15.4137
1628	42.6344	27.6462	10.8155	29.3838	3.91249	8.08632	26.2893	18.6377	0.445958	15.3971
1629	42.593	27.6203	10.8027	29.353	3.91093	8.07652	26.2606	18.6176	0.444532	15.3805
1630	42.5517	27.5944	10.79	29.3222	3.90941	8.06672	26.2318	18.5976	0.443108	15.3639
1631	42.5105	27.5685	10.7772	29.2914	3.90793	8.05694	26.2031	18.5776	0.441686	15.3473
1632	42.4694	27.5426	10.7645	29.2607	3.90648	8.04717	26.1744	18.5577	0.440265	15.3308
1633	42.4285	27.5168	10.7518	29.2299	3.90506	8.03741	26.1457	18.5377	0.438846	15.3142
1634	42.3876	27.491	10.7391	29.1991	3.90367	8.02766	26.1171	18.5178	0.437429	15.2977
1635	42.3468	27.4652	10.7264	29.1683	3.90231	8.01792	26.0885	18.4979	0.436014	15.2812
1636	42.3061	27.4394	10.7137	29.1375	3.90098	8.00819	26.0599	18.478	0.4346	15.2647
1637	42.2656	27.4137	10.701	29.1067	3.89967	7.99847	26.0313	18.4581	0.433187	15.2482
1638	42.2252	27.3879	10.6883	29.0759	3.89839	7.98876	26.0028	18.4383	0.431777	15.2317
1639	42.1849	27.3622	10.6757	29.0452	3.89712	7.97906	25.9743	18.4185	0.430368	15.2153
1640	42.1447	27.3366	10.6631	29.0144	3.89588	7.96937	25.9458	18.3986	0.428961	15.1988
1641	42.1047	27.3109	10.6505	28.9837	3.89466	7.95969	25.9173	18.3789	0.427556	15.1824
1642	42.0648	27.2853	10.6379	28.9529	3.89346	7.95003	25.8889	18.3591	0.426152	15.166
1643	42.0251	27.2596	10.6253	28.9222	3.89227	7.94037	25.8605	18.3393	0.42475	15.1495
1644	41.9856	27.2341	10.6127	28.8915	3.8911	7.93072	25.8322	18.3196	0.42335	15.1331
1645	41.9463	27.2085	10.6001	28.8608	3.88995	7.92109	25.8038	18.2999	0.421951	15.1168
1646	41.9071	27.1829	10.5876	28.8301	3.88881	7.91146	25.7755	18.2802	0.420555	15.1004
1647	41.8683	27.1574	10.5751	28.7995	3.88768	7.90185	25.7472	18.2605	0.41916	15.084
1648	41.8297	27.1319	10.5625	28.7688	3.88657	7.89224	25.719	18.2409	0.417766	15.0677
1649	65.2469	27.1064	10.55	28.7382	3.88547	7.88265	25.6907	18.2212	0.416375	15.0513
1650	65.1763	27.0809	10.5375	28.7076	3.88438	7.87307	25.6625	18.2016	0.414985	15.035
1651	65.1058	27.0555	10.5251	28.677	3.88331	7.86349	25.6343	18.182	0.413597	15.0187
1652	65.0353	27.0301	10.5126	28.6465	3.88224	7.85393	25.6062	18.1624	0.412211	15.0024
1653	64.9649	27.0047	10.5001	28.616	3.88118	7.84438	25.5781	18.1429	0.410826	14.9862
1654	64.8946	26.9793	10.4877	28.5857	3.88013	7.83484	25.55	18.1234	0.409443	14.9699
1655	64.8245	26.954	10.4753	28.5556	3.87909	7.82531	25.5219	18.1038	0.408062	14.9536
1656	64.7545	26.9286	10.4629	28.5255	3.87806	7.81579	25.4939	18.0843	0.406683	14.9374
1657	64.6847	26.9033	10.4505	28.4955	3.87704	7.80628	25.4659	18.0649	0.405305	14.9212
1658	64.615	26.878	10.4381	28.4657	3.87602	7.79678	25.4379	18.0454	0.403929	14.905
1659	64.5455	26.8527	10.4257	28.4359	3.87501	7.78729	25.4099	18.026	0.402555	14.8888
1660	64.4762	26.8275	10.4133	28.4063	3.87401	7.7778	25.382	18.0065	0.401183	14.8726
1661	64.407	26.8023	10.401	28.3767	3.87301	7.76833	25.3541	17.9871	0.399813	14.8564
1662	64.3379	26.7771	10.3886	28.3472	3.87201	7.75887	25.3262	17.9677	0.398444	14.8403
1663	64.269	26.7519	10.3763	28.3178	3.87103	7.74942	25.2983	17.9484	0.397077	14.8241
1664	64.2002	26.7267	10.364	28.2884	3.87004	7.73998	25.2705	17.929	0.395712	14.808
1665	64.1316	26.7016	10.3517	28.2592	3.86906	7.73055	25.2427	17.9097	0.394348	14.7919
1666	64.0631	26.6765	10.3394	28.2299	3.86809	7.72113	25.2149	17.8904	0.392986	14.7758
1667	63.9947	26.6514	10.3272	28.2008	3.86712	7.71172	25.1872	17.8711	0.391627	14.7597
1668	63.9265	26.6263	10.3149	28.1717	3.86615	7.70232	25.1595	17.8518	0.390268	14.7436
1669	63.8584	26.6012	10.3027	28.1427	3.86519	7.69293	25.1318	17.8326	0.388912	14.7276
1670	63.7904	26.5762	10.2905	28.1137	3.86422	7.68354	25.1041	17.8134	0.387558	14.7115
1671	63.7226	26.5512	10.2782	28.0848	3.86326	7.67417	25.0765	17.7942	0.386205	14.6955
1672	63.6549	26.5262	10.266	28.0559	3.86231	7.66481	25.0489	17.775	0.384854	14.6795
1673	63.5873	26.5012	10.2538	28.0271	3.86135	7.65546	25.0213	17.7558	0.383505	14.6635
1674	63.5198	26.4763	10.2417	27.9984	3.8604	7.64612	24.9937	17.7366	0.382157	14.6475
1675	63.4525	26.4513	10.2295	27.9698	3.85945	7.63679	24.9662	17.7175	0.380812	14.6315
1676	63.3852	26.4264	10.2174	27.9413	3.8585	7.62746	24.9387	17.6984	0.379468	14.6155
1677	63.3181	26.4016	10.2052	27.9129	3.85755	7.61815	24.9112	17.6793	0.378126	14.5996
1678	63.2511	26.3767	10.1931	27.8848	3.85661	7.60885	24.8838	17.6602	0.376786	14.5837
1679	63.1842	26.3518	10.181	27.8568	3.85566	7.59956	24.8564	17.6412	0.375447	14.5677
1680	63.1174	26.327	10.1689	27.829	3.85472	7.59028	24.829	17.6221	0.374111	14.5518
1681	63.0507	26.3022	10.1568	27.8014	3.85377	7.58101	24.8016	17.6031	0.372776	14.5359
1682	62.9842	26.2774	10.1447	27.7739	3.85283	7.57174	24.7742	17.5841	0.371443	14.5199
1683	62.9177	26.2527	10.1327	27.7466	3.85188	7.56249	24.7469	17.5651	0.370111	14.504
1684	62.8514	26.228	10.1206	27.7194	3.85094	7.55325	24.7196	17.5461	0.368782	14.4881
1685	62.7851	26.2032	10.1086	27.6923	3.85	7.54401	24.6924	17.5272	0.367454	14.4722
1686	62.719	26.1785	10.0966	27.6653	3.84905	7.53479	24.6651	17.5083	0.366128	14.4563
1687	62.653	26.1539	10.0846	27.6384	3.84811	7.52557	24.6379	17.4894	0.364804	14.4404
1688	62.587	26.1292	10.0726	27.6115	3.84716	7.51637	24.6109	17.4705	0.363482	14.4245
1689	62.5212	26.1046	10.0606	27.5847	3.84622	7.50717	24.584	17.4516	0.362162	14.4086
1690	62.4555	26.08	10.0486	27.5579	3.84527	7.49799	24.5572	17.4328	0.360843	14.3927
1691	62.3899	26.0554	10.0367	27.5311	3.84433	7.48881	24.5306	17.4139	0.359526	14.3769
1692	62.3243	26.0308	10.0247	27.5044	3.84338	7.47964	24.5041	17.3951	0.358211	14.361
1693	62.2589	26.0063	10.0128	27.4777	3.84243	7.47049	24.4778	17.3763	0.356898	14.3451
1694	62.1935	25.9817	10.0009	27.451	3.84149	7.46134	24.4516	17.3575	0.355587	14.3293
1695	62.1283	25.9572	9.98899	27.4244	3.84054	7.4522	24.4255	17.3388	0.354277	14.3134
1696	62.0632	25.9327	9.9771	27.3978	3.83958	7.44308	24.3995	17.32	0.352969	14.2976
1697	61.9981	25.9083	9.96522	27.3712	3.83863	7.43396	24.3737	17.3013	0.351663	14.2818
1698	61.9331	25.8838	9.95336	27.3446	3.83768	7.42485	24.348	17.2826	0.350359	14.266
1699	61.8683	25.8594	9.94151	27.3181	3.83672	7.41575	24.3224	17.2639	0.349057	14.2502
1700	61.8035	25.835	9.92967	27.2916	3.83577	7.40666	24.2968	17.2453	0.347756	14.2344
1701	61.7388	25.8106	9.91784	27.2651	3.83481	7.39758	24.2714	17.2266	0.346457	14.2186
1702	61.6742	25.7863	9.90603	27.2386	3.83385	7.38851	24.2461	17.208	0.345161	14.2028
1703	61.6097	25.7619	9.89423	27.2122	3.83289	7.37946	24.2209	17.1894	0.343866	14.187
1704	61.5453	25.7376	9.88244	27.1858	3.83192	7.37041	24.1958	17.1708	0.342572	14.1713
1705	61.4809	25.7133	9.87067	27.1594	3.83096	7.36137	24.1708	17.1522	0.341281	14.1555
1706	61.4167	25.689	9.85891	27.133	3.82999	7.35234	24.1458	17.1337	0.339991	14.1398
1707	61.3525	25.6648	9.84716	27.1067	3.82902	7.34331	24.121	17.1151	0.338703	14.1241
1708	61.2885	25.6405	9.83542	27.0804	3.82805	7.3343	24.0962	17.0966	0.337417	14.1084
1709	61.2245	25.6163	9.8237	27.0541	3.82707	7.3253	24.0715	17.0781	0.336133	14.0927
1710	61.1606	25.5921	9.81199	27.0278	3.8261	7.31631	24.0469	17.0596	0.334851	14.077
1711	61.0967	25.5679	9.80029	27.0016	3.82512	7.30733	24.0224	17.0412	0.33357	14.0613
1712	61.033	25.5438	9.7886	26.9753	3.82414	7.29836	23.9979	17.0227	0.332292	14.0457
1713	60.9693	25.5197	9.77693	26.9491	3.82315	7.2894	23.9736	17.0043	0.331015	14.03
1714	60.9058	25.4955	9.76526	26.9229	3.82217	7.28044	23.9492	16.9859	0.32974	14.0144
1715	60.8423	25.4715	9.75362	26.8968	3.82118	7.2715	23.925	16.9675	0.328467	13.9987
1716	60.7789	25.4474	9.74198	26.8706	3.82019	7.26257	23.9008	16.9492	0.327195	13.9831
1717	60.7155	25.4233	9.73035	26.8445	3.8192	7.25364	23.8767	16.9308	0.325926	13.9675
1718	60.6523	25.3993	9.71874	26.8184	3.8182	7.24473	23.8527	16.9125	0.324658	13.9519
1719	60.5891	25.3753	9.70714	26.7924	3.8172	7.23582	23.8287	16.8942	0.323392	13.9363
1720	60.526	25.3513	9.69556	26.7663	3.8162	7.22692	23.8048	16.8759	0.322128	13.9207
1721	60.463	25.3273	9.68398	26.7403	3.8152	7.21804	23.781	16.8576	0.320866	13.9051
1722	60.4001	25.3034	9.67242	26.7143	3.81419	7.20916	23.7572	16.8393	0.319605	13.8895
1723	60.3372	25.2795	9.66087	26.6883	3.81318	7.20029	23.7335	16.8211	0.318347	13.874
1724	60.2744	25.2555	9.64933	26.6623	3.81217	7.19143	23.7098	16.8029	0.31709	13.8584
1725	60.2117	25.2317	9.63781	26.6364	3.81115	7.18258	23.6862	16.7847	0.315835	13.8428
1726	60.1491	25.2078	9.6263	26.6105	3.81014	7.17374	23.6626	16.7665	0.314582	13.8273
1727	60.0866	25.1839	9.6148	26.5846	3.80911	7.16491	23.6391	16.7483	0.313331	13.8118
1728	60.0241	25.1601	9.60331	26.5587	3.80809	7.15609	23.6157	16.7302	0.312081	13.7962
1729	59.9617	25.1363	9.59184	26.5328	3.80706	7.14727	23.5923	16.712	0.310834	13.7807
1730	59.8994	25.1125	9.58037	26.507	3.80603	7.13847	23.5689	16.6939	0.309588	13.7652
1731	59.8371	25.0888	9.56892	26.4812	3.805	7.12968	23.5456	16.6758	0.308344	13.7497
1732	59.7749	25.065	9.55749	26.4554	3.80396	7.1209	23.5224	16.6577	0.307102	13.7342
1733	59.7128	25.0413	9.54606	26.4296	3.80292	7.11212	23.4991	16.6397	0.305862	13.7188
1734	59.6508	25.0176	9.53465	26.4039	3.80188	7.10336	23.4761	16.6216	0.304624	13.7033
1735	59.5888	24.9939	9.52325	26.3781	3.80083	7.0946	23.4531	16.6036	0.303387	13.6878
1736	59.527	24.9702	9.51186	26.3524	3.79979	7.08586	23.4303	16.5856	0.302152	13.6724
1737	59.4651	24.9466	9.50048	26.3267	3.79873	7.07712	23.4076	16.5676	0.300919	13.657
1738	59.4034	24.923	9.48912	26.3011	3.79768	7.06839	23.385	16.5496	0.299688	13.6416
1739	59.3417	24.8994	9.47777	26.2754	3.79662	7.05967	23.3625	16.5317	0.298459	13.6262
1740	59.2801	24.8758	9.46643	26.2498	3.79556	7.05097	23.3401	16.5137	0.297232	13.6108
1741	59.2186	24.8522	9.4551	26.2242	3.79449	7.04227	23.3178	16.4958	0.296006	13.5954
1742	59.1571	24.8287	9.44379	26.1986	3.79342	7.03358	23.2956	16.4779	0.294783	13.58
1743	59.0958	24.8051	9.43248	26.1731	3.79235	7.0249	23.2736	16.46	0.293561	13.5647
1744	59.0344	24.7816	9.42119	26.1475	3.79128	7.01623	23.2516	16.4422	0.292341	13.5493
1745	58.9732	24.7582	9.40991	26.122	3.7902	7.00757	23.2297	16.4243	0.291123	13.534
1746	58.912	24.7347	9.39865	26.0965	3.78911	6.99892	23.2078	16.4065	0.289906	13.5187
1747	58.8509	24.7113	9.38739	26.071	3.78803	6.99027	23.1861	16.3887	0.288692	13.5034
1748	58.7898	24.6879	9.37615	26.0455	3.78694	6.98164	23.1644	16.3709	0.287479	13.4881
1749	58.7287	24.6645	9.36492	26.0201	3.78585	6.97302	23.1429	16.3531	0.286269	13.4728
1750	58.6677	24.6411	9.3537	25.9947	3.78475	6.9644	23.1214	16.3354	0.28506	13.4575
1751	58.6066	24.6178	9.3425	25.9693	3.78365	6.9558	23.1	16.3176	0.283853	13.4423
1752	58.5456	24.5945	9.3313	25.9439	3.78255	6.9472	23.0787	16.2999	0.282648	13.4271
1753	58.4846	24.5712	9.32012	25.9185	3.78144	6.93862	23.0574	16.2822	0.281444	13.4118
1754	58.4236	24.5479	9.30895	25.8931	3.78033	6.93004	23.0362	16.2645	0.280243	13.3966
1755	58.3626	24.5247	9.29779	25.8676	3.77922	6.92147	23.0151	16.2469	0.279043	13.3814
1756	58.3017	24.5015	9.28664	25.8421	3.7781	6.91292	22.9941	16.2292	0.277845	13.3663
1757	58.2408	24.4783	9.27551	25.8166	3.77698	6.90437	22.9731	16.2116	0.276649	13.3511
1758	58.1799	24.4551	9.26439	25.7911	3.77586	6.89583	22.9522	16.194	0.275455	13.3359
1759	58.119	24.4319	9.25328	25.7656	3.77473	6.8873	22.9314	16.1764	0.274263	13.3208
1760	58.0582	24.4088	9.24218	25.7401	3.7736	6.87878	22.9106	16.1588	0.273073	13.3057
1761	57.9974	24.3857	9.23109	25.7145	3.77246	6.87027	22.8899	16.1412	0.271884	13.2906
1762	57.9366	24.3626	9.22002	25.689	3.77132	6.86176	22.8691	16.1237	0.270697	13.2755
1763	57.8758	24.3396	9.20895	25.6635	3.77018	6.85327	22.8483	16.1062	0.269513	13.2604
1764	57.8151	24.3165	9.1979	25.6379	3.76904	6.84479	22.8275	16.0886	0.26833	13.2453
1765	57.7544	24.2935	9.18686	25.6124	3.76789	6.83631	22.8067	16.0712	0.267149	13.2303
1766	57.6937	24.2705	9.17584	25.5869	3.76673	6.82785	22.7859	16.0537	0.265969	13.2152
1767	57.6331	24.2475	9.16482	25.5613	3.76558	6.81939	22.7651	16.0362	0.264792	13.2002
1768	57.5725	24.2246	9.15382	25.5358	3.76442	6.81095	22.7443	16.0188	0.263616	13.1852
1769	57.5119	24.2017	9.14283	25.5103	3.76325	6.80251	22.7235	16.0014	0.262443	13.1702
1770	57.4514	24.1788	9.13185	25.4848	3.76209	6.79408	22.7027	15.984	0.261271	13.1552
1771	57.3909	24.1559	9.12088	25.4593	3.76091	6.78566	22.6819	15.9666	0.260101	13.1402
1772	57.3304	24.133	9.10992	25.4338	3.75974	6.77725	22.6611	15.9492	0.258933	13.1253
1773	57.27	24.1102	9.09898	25.4084	3.75856	6.76885	22.6402	15.9319	0.257766	13.1103
1774	57.2096	24.0874	9.08805	25.3829	3.75738	6.76046	22.6194	15.9145	0.256602	13.0954
1775	57.1492	24.0646	9.07713	25.3575	3.75619	6.75208	22.5986	15.8972	0.25544	13.0805
1776	57.0889	24.0418	9.06622	25.332	3.755	6.74371	22.5778	15.8799	0.254279	13.0656
1777	57.0286	24.019	9.05532	25.3066	3.75381	6.73535	22.557	15.8626	0.25312	13.0507
1778	56.9683	23.9963	9.04444	25.2812	3.75261	6.72699	22.5361	15.8454	0.251963	13.0359
1779	56.9081	23.9736	9.03357	25.2558	3.75141	6.71865	22.5153	15.8281	0.250808	13.021
1780	56.848	23.9509	9.0227	25.2304	3.7502	6.71031	22.4945	15.8109	0.249655	13.0062
1781	56.7878	23.9282	9.01186	25.2051	3.749	6.70198	22.4737	15.7937	0.248503	12.9914
1782	56.7277	23.9056	9.00102	25.1797	3.74778	6.69367	22.4529	15.7765	0.247354	12.9766
1783	56.6677	23.883	8.99019	25.1544	3.74657	6.68536	22.4321	15.7593	0.246206	12.9618
1784	56.6077	23.8603	8.97938	25.1291	3.74535	6.67706	22.4113	15.7421	0.245061	12.947
1785	56.5477	23.8378	8.96858	25.1037	3.74413	6.66877	22.3905	15.725	0.243917	12.9322
1786	56.4878	23.8152	8.95779	25.0783	3.7429	6.66049	22.3697	15.7079	0.242775	12.9175
1787	56.4279	23.7927	8.94701	25.0529	3.74167	6.65221	22.3489	15.6908	0.241634	12.9027
1788	56.368	23.7701	8.93624	25.0275	3.74043	6.64395	22.3281	15.6737	0.240496	12.888
1789	56.3082	23.7476	8.92548	25.0021	3.73919	6.6357	22.3073	15.6566	0.23936	12.8733
1790	56.2485	23.7251	8.91474	24.9767	3.73795	6.62745	22.2865	15.6396	0.238225	12.8586
1791	56.1887	23.7027	8.90401	24.9513	3.73671	6.61922	22.2657	15.6225	0.237092	12.8439
1792	56.1291	23.6802	8.89329	24.9259	3.73546	6.61099	22.245	15.6055	0.235962	12.8293
1793	56.0694	23.6578	8.88258	24.9004	3.7342	6.60277	22.2242	15.5885	0.234833	12.8146
1794	56.0098	23.6354	8.87188	24.875	3.73295	6.59456	22.2034	15.5715	0.233706	12.8
1795	55.9503	23.613	8.86119	24.8496	3.73168	6.58636	22.1827	15.5545	0.23258	12.7854
1796	55.8908	23.5907	8.85052	24.8242	3.73037	6.57817	22.1619	15.5376	0.231457	12.7708
1797	55.8313	23.5684	8.83986	24.7988	3.72899	6.56999	22.1412	15.5206	0.230336	12.7562
1798	55.7719	23.546	8.82921	24.7734	3.72756	6.56182	22.1205	15.5037	0.229216	12.7416
1799	55.7126	23.5237	8.81857	24.7481	3.72608	6.55365	22.0998	15.4868	0.228098	12.7271
1800	55.6532	23.5015	8.80794	24.7227	3.72455	6.5455	22.079	15.4699	0.226982	12.7125
1801	55.594	23.4792	8.79732	24.6974	3.72297	6.53735	22.0583	15.4531	0.225868	12.698
1802	55.5347	23.457	8.78672	24.672	3.72134	6.52922	22.0376	15.4362	0.224756	12.6835
1803	55.4755	23.4348	8.77613	24.6467	3.71966	6.52109	22.017	15.4194	0.223646	12.669
1804	55.4164	23.4126	8.76554	24.6214	3.71794	6.51297	21.9963	15.4026	0.222538	12.6545
1805	55.3573	23.3904	8.75497	24.5961	3.71618	6.505	21.9756	15.3858	0.221431	12.64
1806	55.2983	23.3682	8.74442	24.5708	3.71437	6.49717	21.9549	15.369	0.220327	12.6256
1807	55.2393	23.3461	8.73387	24.5456	3.71253	6.48946	21.9342	15.3522	0.219224	12.6111
1808	55.1803	23.324	8.72333	24.5203	3.71064	6.48188	21.9135	15.3355	0.218123	12.5967
1809	55.1214	23.3019	8.71281	24.4951	3.70872	6.47441	21.8926	15.3187	0.217024	12.5823
1810	55.0626	23.2798	8.7023	24.4699	3.70676	6.46705	21.8718	15.302	0.215927	12.5679
1811	55.0037	23.2577	8.69179	24.4447	3.70477	6.45978	21.8509	15.2853	0.214832	12.5535
1812	54.945	23.2357	8.68131	24.4195	3.70274	6.4526	21.83	15.2687	0.213738	12.5391
1813	54.8863	23.2137	8.67083	24.3943	3.70068	6.44552	21.809	15.252	0.212647	12.5247
1814	54.8276	23.1917	8.66036	24.3692	3.69859	6.43851	21.788	15.2353	0.211557	12.5104
1815	54.769	23.1697	8.6499	24.3441	3.69647	6.43158	21.7669	15.2187	0.21047	12.496
1816	54.7104	23.1478	8.63946	24.319	3.69431	6.42472	21.7459	15.2021	0.209384	12.4817
1817	54.6519	23.1258	8.62903	24.2939	3.69213	6.41792	21.7248	15.1855	0.2083	12.4674
1818	54.5934	23.1039	8.61861	24.2688	3.68992	6.41119	21.7037	15.1689	0.207218	12.4531
1819	54.535	23.082	8.60819	24.2438	3.68769	6.40452	21.6826	15.1524	0.206138	12.4388
1820	54.4766	23.0601	8.5978	24.2188	3.68543	6.3979	21.6614	15.1358	0.205059	12.4245
1821	54.4183	23.0383	8.58741	24.1938	3.68314	6.39133	21.6402	15.1193	0.203983	12.4102
1822	54.36	23.0164	8.57703	24.1688	3.68083	6.38481	21.619	15.1028	0.202908	12.396
1823	54.3018	22.9946	8.56667	24.1438	3.67849	6.37834	21.5978	15.0863	0.201836	12.3817
1824	54.2436	22.9728	8.55631	24.1189	3.67614	6.37191	21.5766	15.0698	0.200765	12.3675
1825	54.1855	22.951	8.54597	24.0939	3.67376	6.36553	21.5554	15.0533	0.199696	12.3533
1826	54.1274	22.9293	8.53564	24.069	3.67136	6.35918	21.5342	15.0369	0.198629	12.3391
1827	54.0693	22.9075	8.52532	24.0441	3.66893	6.35286	21.5129	15.0205	0.197564	12.3249
1828	54.0114	22.8858	8.51501	24.0193	3.66649	6.34658	21.4917	15.004	0.196496	12.3107
1829	53.9534	22.8641	8.50471	23.9944	3.66403	6.34034	21.4704	14.9876	0.195427	12.2965
1830	53.8955	22.8424	8.49443	23.9696	3.66156	6.33412	21.4491	14.9713	0.194355	12.2824
1831	53.8377	22.8207	8.48415	23.9448	3.65906	6.32793	21.4279	14.9549	0.193281	12.2682
1832	53.7799	22.7991	8.47389	23.92	3.65655	6.32177	21.4066	14.9386	0.192205	12.2541
1833	53.7222	22.7775	8.46364	23.8953	3.65401	6.31563	21.3853	14.9222	0.191128	12.24
1834	53.6645	22.7559	8.45339	23.8705	3.65147	6.30952	21.3641	14.9059	0.190049	12.2258
1835	53.6069	22.7343	8.44316	23.8458	3.64891	6.30343	21.3428	14.8896	0.188968	12.2118
1836	53.5493	22.7127	8.43294	23.8211	3.64633	6.29737	21.3215	14.8733	0.187886	12.1977
1837	53.4917	22.6912	8.42273	23.7964	3.64374	6.29132	21.3002	14.8571	0.186803	12.1836
1838	53.4343	22.6696	8.41254	23.7718	3.64113	6.28529	21.279	14.8408	0.185719	12.1695
1839	53.3768	22.6481	8.40235	23.7471	3.63851	6.27929	21.2577	14.8246	0.184634	12.1555
1840	53.3194	22.6266	8.39217	23.7225	3.63587	6.2733	21.2364	14.8084	0.183547	12.1415
1841	53.2621	22.6052	8.382	23.6979	3.63323	6.26732	21.2152	14.7922	0.18246	12.1274
1842	53.2048	22.5837	8.37185	23.6734	3.63057	6.26136	21.1939	14.776	0.181372	12.1134
1843	53.1476	22.5623	8.36171	23.6488	3.6279	6.25542	21.1726	14.7599	0.180283	12.0994
1844	53.0904	22.5408	8.35157	23.6243	3.62521	6.24949	21.1514	14.7437	0.179194	12.0854
1845	53.0332	22.5195	8.34145	23.5998	3.62252	6.24358	21.1302	14.7276	0.178104	12.0715
1846	52.9762	22.4981	8.33134	23.5753	3.61981	6.23768	21.1089	14.7115	0.177014	12.0575
1847	52.9191	22.4767	8.32124	23.5508	3.61707	6.23179	21.0877	14.6954	0.175923	12.0436
1848	52.8621	22.4554	8.31115	23.5264	3.61428	6.22591	21.0665	14.6793	0.174832	12.0296
1849	52.8052	22.4341	8.30107	23.5019	3.61146	6.22004	21.0453	14.6632	0.173741	12.0157
1850	52.7483	22.4127	8.291	23.4775	3.6086	6.21419	21.0241	14.6472	0.172649	12.0018
1851	52.6915	22.3915	8.28094	23.4531	3.60571	6.20834	21.0029	14.6311	0.171557	11.9879
1852	52.6347	22.3702	8.2709	23.4288	3.60279	6.20251	20.9817	14.6151	0.170466	11.974
1853	52.578	22.349	8.26086	23.4044	3.59983	6.19668	20.9605	14.5991	0.169374	11.9602
1854	52.5213	22.3277	8.25084	23.3801	3.59685	6.19086	20.9393	14.5831	0.168282	11.9463
1855	52.4647	22.3065	8.24082	23.3558	3.59384	6.18506	20.9182	14.5672	0.167191	11.9325
1856	52.4081	22.2853	8.23082	23.3315	3.5908	6.17926	20.897	14.5512	0.166099	11.9187
1857	52.3515	22.2642	8.22083	23.3073	3.58774	6.17346	20.8759	14.5353	0.165008	11.9049
1858	52.2951	22.243	8.21084	23.283	3.58465	6.16768	20.8548	14.5194	0.163917	11.8911
1859	52.2386	22.2219	8.20087	23.2588	3.58152	6.1619	20.8337	14.5035	0.162826	11.8773
1860	52.1823	22.2008	8.19091	23.2346	3.57834	6.15613	20.8126	14.4876	0.161736	11.8635
1861	52.1259	22.1797	8.18097	23.2105	3.57512	6.15037	20.7915	14.4717	0.160646	11.8498
1862	52.0697	22.1586	8.17103	23.1863	3.57187	6.14461	20.7704	14.4558	0.159556	11.836
1863	52.0134	22.1375	8.1611	23.1622	3.56868	6.13886	20.7493	14.44	0.158467	11.8223
1864	51.9572	22.1165	8.15118	23.1381	3.56556	6.13312	20.7282	14.4242	0.157378	11.8086
1865	51.9011	22.0955	8.14128	23.114	3.56249	6.12738	20.707	14.4084	0.15629	11.7949
1866	51.845	22.0744	8.13138	23.0899	3.55948	6.12165	20.6859	14.3926	0.155203	11.7812
1867	51.789	22.0535	8.1215	23.0659	3.55652	6.11592	20.6647	14.3768	0.154116	11.7675
1868	51.733	22.0325	8.11162	23.0418	3.5536	6.1102	20.6435	14.361	0.15303	11.7539
1869	51.6771	22.0115	8.10176	23.0178	3.55073	6.10448	20.6223	14.3453	0.151944	11.7402
1870	51.6213	21.9906	8.09191	22.9938	3.54789	6.09877	20.6011	14.3296	0.15086	11.7266
1871	51.5654	21.9697	8.08207	22.9699	3.54509	6.09307	20.5799	14.3139	0.149775	11.713
1872	51.5097	21.9488	8.07224	22.9459	3.54233	6.08736	20.5586	14.2982	0.148692	11.6994
1873	51.4539	21.9279	8.06242	22.922	3.53959	6.08167	20.5374	14.2825	0.14761	11.6858
1874	51.3983	21.9071	8.05261	22.8981	3.53688	6.07597	20.5162	14.2668	0.146528	11.6722
1875	51.3426	21.8862	8.04281	22.8742	3.5342	6.07028	20.495	14.2512	0.145448	11.6587
1876	51.2871	21.8654	8.03302	22.8504	3.53154	6.0646	20.4737	14.2356	0.144368	11.6451
1877	51.2316	21.8446	8.02324	22.8265	3.5289	6.05892	20.4525	14.2199	0.143289	11.6316
1878	51.1761	21.8238	8.01348	22.8027	3.52628	6.05324	20.4312	14.2043	0.142211	11.6181
1879	51.1207	21.8031	8.00372	22.7789	3.52368	6.04757	20.4101	14.1888	0.141134	11.6046
1880	51.0653	21.7823	7.99397	22.7551	3.5211	6.0419	20.3891	14.1732	0.140058	11.5911
1881	51.01	21.7616	7.98424	22.7314	3.51853	6.03623	20.3682	14.1576	0.138983	11.5776
1882	50.9547	21.7409	7.97452	22.7076	3.51598	6.03057	20.3473	14.1421	0.137909	11.5642
1883	50.8995	21.7202	7.9648	22.6839	3.51344	6.02491	20.3266	14.1266	0.136836	11.5507
1884	50.8443	21.6995	7.9551	22.6602	3.51091	6.01926	20.3059	14.1111	0.135764	11.5373
1885	50.7892	21.6789	7.94541	22.6365	3.5084	6.0136	20.2853	14.0956	0.134694	11.5238
1886	50.7342	21.6582	7.93572	22.6129	3.50589	6.00795	20.2647	14.0801	0.133624	11.5104
1887	50.6791	21.6376	7.92605	22.5892	3.5034	6.00231	20.2443	14.0647	0.132556	11.497
1888	50.6242	21.617	7.91639	22.5656	3.50091	5.99667	20.2239	14.0492	0.131488	11.4837
1889	50.5693	21.5964	7.90674	22.542	3.49843	5.99103	20.2035	14.0338	0.130422	11.4703
1890	50.5144	21.5759	7.8971	22.5185	3.49596	5.98539	20.1833	14.0184	0.129357	11.4569
1891	50.4596	21.5553	7.88747	22.4949	3.4935	5.97976	20.163	14.003	0.128294	11.4436
1892	50.4048	21.5348	7.87786	22.4714	3.49104	5.97413	20.1428	13.9876	0.127231	11.4303
1893	50.3501	21.5143	7.86825	22.4479	3.48859	5.9685	20.1227	13.9722	0.12617	11.417
1894	50.2955	21.4938	7.85865	22.4244	3.48614	5.96288	20.1026	13.9569	0.12511	11.4037
1895	50.2408	21.4733	7.84906	22.4009	3.4837	5.95726	20.0826	13.9416	0.124051	11.3904
1896	50.1863	21.4528	7.83949	22.3775	3.48126	5.95164	20.0626	13.9262	0.122994	11.3771
1897	50.1318	21.4324	7.82992	22.354	3.47879	5.94602	20.0426	13.9109	0.121937	11.364
1898	50.0773	21.412	7.82036	22.3306	3.4763	5.94041	20.0227	13.8957	0.120882	11.351
1899	50.0229	21.3916	7.81082	22.3072	3.47378	5.9348	20.0029	13.8804	0.119829	11.3382
1900	49.9685	21.3712	7.80128	22.2839	3.47124	5.92919	19.983	13.8651	0.118777	11.3254
1901	49.9142	21.3508	7.79176	22.2605	3.46868	5.92358	19.9632	13.8499	0.117726	11.3128
1902	49.86	21.3305	7.78225	22.2372	3.4661	5.91798	19.9434	13.8347	0.116676	11.3003
1903	49.8058	21.3101	7.77274	22.2139	3.4635	5.91238	19.9237	13.8195	0.115628	11.2878
1904	49.7516	21.2898	7.76325	22.1906	3.46088	5.90678	19.904	13.8043	0.114581	11.2755
1905	49.6975	21.2695	7.75377	22.1674	3.45825	5.90119	19.8843	13.7891	0.113536	11.2632
1906	49.6434	21.2493	7.7443	22.1441	3.45561	5.89559	19.8647	13.7739	0.112492	11.251
1907	49.5894	21.229	7.73483	22.1209	3.45295	5.89	19.8451	13.7588	0.111449	11.2389
1908	49.5355	21.2088	7.72538	22.0977	3.45028	5.88442	19.8255	13.7437	0.110408	11.2268
1909	49.4816	21.1885	7.71594	22.0745	3.4476	5.87883	19.8059	13.7285	0.109369	11.2148
1910	49.4277	21.1683	7.70651	22.0513	3.44491	5.87325	19.7864	13.7134	0.10833	11.2028
1911	49.3739	21.1481	7.69709	22.0282	3.4422	5.86767	19.7668	13.6984	0.107293	11.1909
1912	49.3201	21.128	7.68768	22.0051	3.43949	5.86209	19.7474	13.6833	0.106258	11.179
1913	49.2664	21.1078	7.67828	21.982	3.43677	5.85651	19.7279	13.6682	0.105224	11.1672
1914	49.2128	21.0877	7.66889	21.9589	3.43404	5.85094	19.7085	13.6532	0.104192	11.1554
1915	49.1591	21.0676	7.65951	21.9358	3.4313	5.84537	19.689	13.6382	0.103157	11.1437
1916	49.1056	21.0474	7.65014	21.9128	3.42856	5.8398	19.6696	13.6232	0.102121	11.132
1917	49.0521	21.0274	7.64078	21.8898	3.42581	5.83423	19.6503	13.6082	0.101084	11.1203
1918	48.9986	21.0073	7.63143	21.8668	3.42305	5.82867	19.6309	13.5932	0.100045	11.1086
1919	48.9452	20.9873	7.6221	21.8438	3.42029	5.82311	19.6116	13.5782	0.0990049	11.097
1920	48.8918	20.9672	7.61277	21.8208	3.41752	5.81755	19.5923	13.5633	0.0979636	11.0854
1921	48.8385	20.9472	7.60345	21.7979	3.41475	5.81199	19.573	13.5484	0.0969212	11.0738
1922	48.7853	20.9272	7.59414	21.775	3.41197	5.80643	19.5537	13.5335	0.0958778	11.0623
1923	48.732	20.9072	7.58485	21.7521	3.40919	5.80088	19.5345	13.5186	0.0948337	11.0508
1924	48.6789	20.8873	7.57556	21.7292	3.4064	5.79533	19.5153	13.5037	0.0937887	11.0392
1925	48.6257	20.8673	7.56628	21.7063	3.40361	5.78978	19.4961	13.4888	0.0927432	11.0278
1926	48.5726	20.8474	7.55702	21.6835	3.40082	5.78424	19.4769	13.4739	0.091697	11.0163
1927	48.5196	20.8275	7.54776	21.6607	3.39802	5.77869	19.4577	13.4591	0.0906504	11.0049
1928	48.4666	20.8076	7.53851	21.6379	3.39522	5.77315	19.4385	13.4443	0.0896034	10.9934
1929	48.4136	20.7877	7.52928	21.6151	3.39241	5.76761	19.4194	13.4295	0.088556	10.982
1930	48.3607	20.7679	7.52005	21.5923	3.38961	5.76207	19.4004	13.4147	0.0875085	10.9706
1931	48.3079	20.748	7.51083	21.5696	3.3868	5.75654	19.3815	13.3999	0.0864607	10.9593
1932	48.255	20.7282	7.50163	21.5469	3.38398	5.75101	19.3626	13.3851	0.0854129	10.9479
1933	48.2022	20.7084	7.49243	21.5242	3.38117	5.74547	19.3439	13.3704	0.084365	10.9366
1934	48.1495	20.6886	7.48325	21.5015	3.37835	5.73995	19.3252	13.3557	0.0833172	10.9252
1935	48.0968	20.6689	7.47407	21.4788	3.37553	5.73442	19.3066	13.3409	0.0822694	10.9139
1936	48.0442	20.6491	7.46491	21.4561	3.3727	5.7289	19.2881	13.3262	0.0812218	10.9026
1937	47.9916	20.6294	7.45575	21.4334	3.36988	5.72338	19.2697	13.3116	0.0801744	10.8913
1938	47.939	20.6096	7.44661	21.4108	3.36705	5.71786	19.2513	13.2969	0.0791273	10.88
1939	47.8865	20.5899	7.43747	21.3881	3.36422	5.71231	19.233	13.2822	0.0780805	10.8688
1940	47.834	20.5703	7.42835	21.3654	3.36139	5.70674	19.2148	13.2676	0.0770341	10.8575
1941	47.7816	20.5506	7.41923	21.3426	3.35856	5.70115	19.1966	13.2529	0.075988	10.8463
1942	47.7292	20.531	7.41013	21.3199	3.35572	5.69554	19.1784	13.2383	0.0749424	10.8351
1943	47.6769	20.5113	7.40103	21.2972	3.35289	5.68991	19.1603	13.2237	0.0738973	10.8238
1944	47.6246	20.4917	7.39195	21.2744	3.35005	5.68426	19.1423	13.2092	0.0728528	10.8126
1945	47.5724	20.4721	7.38287	21.2517	3.34721	5.67859	19.1243	13.1946	0.0718088	10.8014
1946	47.5202	20.4525	7.37381	21.2289	3.34437	5.67291	19.1064	13.18	0.0707655	10.7902
1947	47.4681	20.433	7.36475	21.2061	3.34153	5.66721	19.0884	13.1655	0.0697228	10.7789
1948	47.416	20.4134	7.35571	21.1833	3.33868	5.6615	19.0706	13.151	0.0686808	10.7677
1949	47.3639	20.3939	7.34667	21.1605	3.33584	5.65577	19.0528	13.1365	0.0676396	10.7565
1950	47.3119	20.3744	7.33765	21.1377	3.33299	5.65003	19.035	13.122	0.0665991	10.7452
1951	47.26	20.3549	7.32863	21.1149	3.33014	5.64428	19.0172	13.1075	0.0655594	10.7339
1952	47.2081	20.3354	7.31963	21.0921	3.3273	5.63851	18.9995	13.093	0.0645205	10.7227
1953	47.1562	20.316	7.31063	21.0693	3.32445	5.63274	18.9818	13.0786	0.0634824	10.7114
1954	47.1044	20.2965	7.30165	21.0464	3.3216	5.62696	18.9642	13.0641	0.0624453	10.7002
1955	47.0527	20.2771	7.29267	21.0236	3.31874	5.62116	18.9466	13.0497	0.0614091	10.6889
1956	47.0009	20.2577	7.28371	21.0008	3.31589	5.61536	18.929	13.0353	0.0603737	10.6776
1957	46.9493	20.2383	7.27475	20.9781	3.31304	5.60955	18.9114	13.0209	0.0593394	10.6664
1958	46.8977	20.2189	7.2658	20.9553	3.31018	5.60373	18.8939	13.0065	0.058306	10.6551
1959	46.8461	20.1995	7.25687	20.9325	3.30733	5.59791	18.8764	12.9922	0.0572737	10.6438
1960	46.7946	20.1802	7.24794	20.9097	3.30447	5.59208	18.8589	12.9778	0.0562423	10.6326
1961	46.7431	20.1609	7.23903	20.887	3.30161	5.58624	18.8415	12.9635	0.055212	10.6213
1962	46.6917	20.1416	7.23012	20.8643	3.29876	5.58039	18.8241	12.9492	0.0541828	10.6101
1963	46.6403	20.1223	7.22122	20.8415	3.2959	5.57455	18.8067	12.9349	0.0531547	10.5989
1964	46.589	20.103	7.21234	20.8188	3.29304	5.56869	18.7893	12.9206	0.0521277	10.5876
1965	46.5377	20.0838	7.20346	20.7961	3.29018	5.56284	18.7719	12.9063	0.0511018	10.5764
1966	46.4865	20.0645	7.19459	20.7735	3.28732	5.55697	18.7546	12.892	0.0500771	10.5652
1967	46.4353	20.0453	7.18574	20.7508	3.28445	5.55111	18.7373	12.8778	0.0490535	10.5539
1968	46.3841	20.0261	7.17689	20.7281	3.28159	5.54524	18.72	12.8636	0.0480311	10.5427
1969	46.333	20.0069	7.16805	20.7055	3.27873	5.53937	18.7028	12.8494	0.0470099	10.5315
1970	46.282	19.9877	7.15922	20.6829	3.27587	5.5335	18.6855	12.8352	0.0459899	10.5203
1971	46.231	19.9686	7.15041	20.6603	3.273	5.52762	18.6683	12.821	0.0449712	10.5091
1972	46.1801	19.9494	7.1416	20.6377	3.27014	5.52174	18.6511	12.8068	0.0439536	10.4979
1973	46.1292	19.9303	7.1328	20.6152	3.26727	5.51586	18.6339	12.7926	0.0429374	10.4867
1974	46.0783	19.9112	7.12401	20.5926	3.26441	5.50998	18.6168	12.7785	0.0419224	10.4756
1975	46.0275	19.8921	7.11523	20.5701	3.26154	5.5041	18.5996	12.7644	0.0409086	10.4644
1976	45.9769	19.873	7.10646	20.5476	3.25867	5.49821	18.5825	12.7502	0.0398962	10.4532
1977	45.9265	19.854	7.0977	20.5251	3.2558	5.49233	18.5654	12.7361	0.0388851	10.4421
1978	45.8762	19.835	7.08895	20.5027	3.25294	5.48644	18.5483	12.7221	0.0378753	10.4309
1979	45.8261	19.8159	7.08021	20.4802	3.25007	5.48056	18.5313	12.708	0.0368668	10.4198
1980	45.7762	19.7969	7.07148	20.4578	3.2472	5.47467	18.5142	12.6939	0.0358596	10.4087
1981	45.7264	19.7779	7.06276	20.4354	3.24433	5.46878	18.4972	12.6799	0.0348538	10.3976
1982	45.6767	19.759	7.05405	20.413	3.24146	5.4629	18.4802	12.6659	0.0338494	10.3864
1983	45.6272	19.74	7.04535	20.3906	3.23859	5.45701	18.4632	12.6518	0.0328463	10.3753
1984	45.5778	19.7211	7.03665	20.3683	3.23572	5.45112	18.4462	12.6378	0.0318446	10.3642
1985	45.5285	19.7022	7.02797	20.346	3.23284	5.44524	18.4292	12.6239	0.0308417	10.3531
1986	45.4793	19.6832	7.0193	20.3237	3.22997	5.43935	18.4122	12.6099	0.0298377	10.3421
1987	45.4303	19.6644	7.01064	20.3014	3.2271	5.43347	18.3953	12.5959	0.0288327	10.331
1988	45.3813	19.6455	7.00198	20.2791	3.22423	5.42759	18.3784	12.582	0.0278268	10.3199
1989	45.3324	19.6266	6.99334	20.2569	3.22136	5.4217	18.3615	12.5681	0.0268202	10.3089
1990	45.2836	19.6078	6.9847	20.2347	3.21848	5.41582	18.3446	12.5541	0.025813	10.2978
1991	45.235	19.589	6.97607	20.2125	3.21561	5.40994	18.3277	12.5402	0.0248052	10.2868
1992	45.1864	19.5702	6.96746	20.1903	3.21273	5.40407	18.3109	12.5263	0.0237969	10.2757
1993	45.1379	19.5514	6.95885	20.1681	3.20986	5.39819	18.294	12.5125	0.0227883	10.2647
1994	45.0895	19.5326	6.95025	20.146	3.20699	5.39231	18.2772	12.4986	0.0217794	10.2537
1995	45.0411	19.5138	6.94166	20.1239	3.20411	5.38644	18.2604	12.4848	0.0207679	10.2427
1996	44.9928	19.4951	6.93307	20.1018	3.20124	5.38057	18.2436	12.4709	0.0197542	10.2317
1997	44.9445	19.4764	6.9245	20.0797	3.19834	5.3747	18.2268	12.4571	0.0187384	10.2207
1998	44.8964	19.4577	6.91593	20.0577	3.19542	5.36883	18.21	12.4433	0.0177207	10.2097
[truncated: 8,001 more rows]

## Sheet: Supplement_gi
	0	1	2	3	4	5	6	7	8	9
0	6.66941	5.43798	8.1363	9.57155	5.14365	3.52297	3.74419	4.65229	3.61702	7.73998
1	6.63671	5.41132	8.09642	9.52463	5.11843	3.5057	3.72584	4.62948	3.59929	11.002
2	6.60418	5.3848	8.05673	9.47794	5.09334	3.48851	3.70757	4.60679	3.58165	10.9481
3	6.57181	5.3584	8.01724	9.43148	5.06838	3.47141	3.6894	4.58421	3.56409	10.8944
4	6.53959	5.33213	7.97794	9.38525	5.04353	3.4544	3.67131	4.56173	3.54662	10.841
5	6.50754	5.306	7.93883	9.33924	5.01881	3.43746	3.65332	4.53937	3.52923	10.7879
6	6.47564	5.27999	7.89991	9.29346	4.99421	3.42061	3.63541	4.51712	3.51193	10.735
7	6.44389	5.2541	7.86119	9.2479	4.96973	3.40385	3.61759	4.49498	3.49472	10.6824
8	6.41231	5.22835	7.82265	9.20257	4.94536	3.38716	3.59985	4.47294	3.47759	10.63
9	6.38087	5.20272	7.78431	9.15746	4.92112	3.37056	3.58221	4.45102	3.46054	10.5779
10	6.34959	5.17722	7.74615	9.11257	4.897	3.35403	3.56465	4.4292	3.44358	10.5261
11	6.31847	5.15184	7.70818	9.0679	4.87299	3.33759	3.54717	4.40749	3.4267	10.4745
12	6.2875	5.12658	7.67039	9.02345	4.84911	3.32123	3.52978	4.38588	3.4099	10.4231
13	6.25667	5.10145	7.63279	8.97922	4.82534	3.30495	3.51248	4.36438	3.39318	10.372
14	6.226	5.07645	7.59538	8.9352	4.80168	3.28875	3.49526	4.34299	3.37655	10.3212
15	6.19549	5.05156	7.55814	8.8914	4.77815	3.27263	3.47813	4.3217	3.36	10.2706
16	6.16512	5.0268	7.52109	8.84782	4.75472	3.25659	3.46108	4.30051	3.34353	10.2202
17	6.13489	5.00216	7.48423	8.80444	4.73142	3.24062	3.44411	4.27943	3.32714	10.1701
18	6.10482	4.97764	7.44754	8.76129	4.70822	3.22474	3.42723	4.25846	3.31083	10.1203
19	6.0749	4.95324	7.41103	8.71834	4.68514	3.20893	3.41043	4.23758	3.2946	10.0707
20	6.04512	4.92896	7.3747	8.6756	4.66218	3.1932	3.39371	4.21681	3.27845	10.0213
21	6.01548	4.90479	7.33855	8.63307	4.63932	3.17755	3.37708	4.19614	3.26238	9.97219
22	5.986	4.88075	7.30258	8.59075	4.61658	3.16197	3.36052	4.17557	3.24639	9.92331
23	5.95665	4.85683	7.26678	8.54864	4.59395	3.14647	3.34405	4.1551	3.23047	9.87466
24	5.92745	4.83302	7.23116	8.50674	4.57143	3.13105	3.32766	4.13473	3.21464	9.82626
25	5.8984	4.80933	7.19571	8.46504	4.54902	3.1157	3.31135	4.11446	3.19888	9.77809
26	5.86948	4.78575	7.16044	8.42354	4.52672	3.10043	3.29511	4.09429	3.1832	9.73016
27	5.84071	4.76229	7.12534	8.38225	4.50453	3.08523	3.27896	4.07422	3.16759	9.68246
28	5.81208	4.73895	7.09041	8.34116	4.48245	3.0701	3.26289	4.05425	3.15207	9.635
29	5.78359	4.71572	7.05566	8.30027	4.46048	3.05506	3.24689	4.03438	3.13661	9.58777
30	5.75524	4.6926	7.02107	8.25959	4.43861	3.04008	3.23098	4.0146	3.12124	9.54077
31	5.72703	4.6696	6.98665	8.2191	4.41686	3.02518	3.21514	3.99492	3.10594	9.494
32	5.69895	4.64671	6.9524	8.17881	4.39521	3.01035	3.19938	3.97534	3.09071	9.44746
33	5.67102	4.62393	6.91832	8.13872	4.37366	2.99559	3.1837	3.95585	3.07556	9.40115
34	5.64322	4.60126	6.88441	8.09882	4.35222	2.98091	3.16809	3.93646	3.06049	9.35507
35	5.61556	4.57871	6.85066	8.05912	4.33089	2.96629	3.15256	3.91717	3.04548	9.30921
36	5.58803	4.55626	6.81708	8.01961	4.30966	2.95175	3.13711	3.89796	3.03056	9.26357
37	5.56064	4.53393	6.78366	7.9803	4.28853	2.93728	3.12173	3.87886	3.0157	9.21816
38	5.53338	4.5117	6.75041	7.94118	4.26751	2.92289	3.10642	3.85984	3.00092	9.17298
39	5.50625	4.48959	6.71732	7.90226	4.24659	2.90856	3.0912	3.84092	2.98621	9.12801
40	5.47926	4.46758	6.68439	7.86352	4.22577	2.8943	3.07604	3.82209	2.97157	9.08327
41	5.4524	4.44568	6.65163	7.82497	4.20506	2.88011	3.06097	3.80336	2.957	9.03874
42	5.42568	4.42389	6.61902	7.78662	4.18444	2.86599	3.04596	3.78471	2.94251	8.99443
43	5.39908	4.4022	6.58657	7.74845	4.16393	2.85195	3.03103	3.76616	2.92808	8.95034
44	5.37261	4.38062	6.55429	7.71046	4.14352	2.83797	3.01617	3.7477	2.91373	8.90647
45	5.34628	4.35915	6.52216	7.67267	4.12321	2.82405	3.00139	3.72933	2.89945	8.86281
46	5.32007	4.33778	6.49019	7.63506	4.103	2.81021	2.98667	3.71105	2.88523	8.81936
47	5.29399	4.31652	6.45837	7.59763	4.08289	2.79643	2.97203	3.69286	2.87109	8.77613
48	5.26804	4.29536	6.42671	7.56039	4.06287	2.78273	2.95746	3.67475	2.85702	8.73311
49	5.24222	4.2743	6.39521	7.52332	4.04296	2.76909	2.94297	3.65674	2.84301	8.6903
50	5.21652	4.25335	6.36386	7.48645	4.02314	2.75551	2.92854	3.63882	2.82907	8.6477
51	5.19095	4.2325	6.33266	7.44975	4.00342	2.742	2.91419	3.62098	2.81521	8.60531
52	5.1655	4.21175	6.30162	7.41323	3.98379	2.72856	2.8999	3.60323	2.80141	8.56313
53	5.14018	4.19111	6.27073	7.37689	3.96426	2.71519	2.88568	3.58557	2.78767	8.52115
54	5.11498	4.17056	6.23999	7.34073	3.94483	2.70188	2.87154	3.56799	2.77401	8.47938
55	5.08991	4.15012	6.2094	7.30474	3.92549	2.68863	2.85746	3.5505	2.76041	8.43782
56	5.06496	4.12977	6.17897	7.26894	3.90625	2.67545	2.84346	3.53309	2.74688	8.39646
57	5.04013	4.10953	6.14868	7.2333	3.8871	2.66234	2.82952	3.51578	2.73341	8.3553
58	5.01543	4.08939	6.11854	7.19785	3.86805	2.64929	2.81565	3.49854	2.72002	8.31434
59	4.99084	4.06934	6.08854	7.16256	7.14909	2.6363	2.80185	3.48139	2.70668	8.27358
60	4.96637	4.04939	6.0587	7.12745	7.11404	2.62338	2.78811	3.46433	2.69341	8.23303
61	4.94203	4.02954	6.029	7.09251	7.07917	2.61052	2.77444	3.44734	2.68021	8.19267
62	4.9178	4.00979	5.99944	7.05775	7.04447	2.59772	2.76084	3.43044	2.66707	8.15251
63	4.8937	3.99013	5.97004	7.02315	7.00994	2.58499	2.74731	3.41363	2.654	8.11254
64	4.86971	3.97057	5.94077	6.98872	6.97557	2.57232	2.73384	3.3969	2.64099	8.07278
65	4.84584	3.95111	5.91165	6.95447	6.94138	2.55971	2.72044	3.38024	2.62804	8.0332
66	4.82208	3.93174	5.88267	6.92037	6.90735	2.54716	2.70711	3.36367	2.61516	7.99383
67	4.79845	3.91247	5.85383	6.88645	6.87349	2.53467	2.69384	3.34719	2.60234	7.95464
68	4.77492	3.89329	5.82514	6.85269	6.8398	2.52225	2.68063	3.33078	2.58958	7.91565
69	4.75152	3.8742	5.79658	6.8191	6.80627	2.50989	2.66749	3.31445	2.57689	7.87685
70	4.72823	3.85521	9.06817	6.78568	6.77291	2.49758	2.65441	3.2982	2.56426	7.83823
71	4.70505	3.83632	9.02372	6.75241	6.73971	2.48534	2.6414	3.28204	2.55169	7.79981
72	4.68198	3.81751	8.97948	6.71931	6.70667	2.47316	2.62845	3.26595	2.53918	11.0616
73	4.65903	3.7988	8.93547	6.68637	6.67379	2.46103	2.61557	3.24994	5.82673	11.0074
74	4.63619	3.78018	8.89167	6.6536	6.64108	2.44897	2.60275	3.23401	5.79817	10.9534
75	4.61347	3.76165	8.84808	6.62098	6.60852	2.43696	2.58999	3.21815	5.76975	10.8997
76	4.59085	3.74321	8.80471	6.58853	6.57613	2.42502	2.57729	3.20238	5.74147	10.8463
77	4.56835	3.72486	8.76155	6.55623	6.54389	2.41313	2.56466	3.18668	5.71332	10.7931
78	4.54596	3.7066	8.7186	6.52409	6.51182	2.4013	2.55209	3.17106	5.68531	10.7402
79	4.52367	3.68843	8.67586	6.49211	6.47989	2.38953	2.53958	3.15551	5.65745	10.6875
80	4.5015	3.67035	8.63333	6.46029	6.44813	2.37782	2.52713	3.14005	5.62971	10.6352
81	4.47943	3.65236	8.59101	6.42862	6.41652	2.36616	2.51474	3.12465	5.60212	10.583
82	4.45747	3.63445	8.5489	6.39711	6.38507	2.35456	2.50241	3.10934	5.57466	10.5311
83	4.43562	3.61664	8.50699	6.36575	6.35377	2.34302	2.49015	3.0941	5.54733	10.4795
84	4.41388	3.59891	8.46529	6.33454	6.32262	2.33153	2.47794	3.07893	5.52014	10.4282
85	4.39224	3.58127	8.42379	6.30349	6.29163	2.32011	2.46579	3.06384	5.49308	10.377
86	4.37071	3.56371	8.3825	6.27259	6.26079	2.30873	2.45371	3.04882	5.46615	10.3262
87	4.34929	3.54624	8.34141	6.24184	6.2301	2.29742	2.44168	3.03387	5.43935	10.2755
88	4.32797	3.52886	8.30052	6.21125	6.19956	2.28615	2.42971	3.019	5.41269	10.2252
89	4.30675	3.51156	8.25983	6.1808	6.16917	2.27495	2.4178	3.0042	5.38616	10.1751
90	4.28564	3.49435	8.21934	6.1505	6.13893	2.2638	2.40595	2.98947	5.35976	10.1252
91	4.26463	3.47722	8.17905	6.12035	6.10884	2.2527	2.39415	2.97482	5.33348	10.0755
92	4.24373	3.46017	8.13896	6.09035	6.07889	2.24166	2.38242	2.96024	5.30734	10.0262
93	4.22292	3.44321	8.09906	6.0605	6.04909	2.23067	2.37074	2.94573	5.28132	9.97701
94	4.20222	3.42633	8.05936	6.03079	6.01944	2.21973	2.35912	2.93129	5.25543	9.9281
95	4.18162	3.40954	8.01985	6.00122	5.98993	2.20885	2.34755	2.91692	5.22967	9.87943
96	4.16113	3.39282	7.98054	5.97181	5.96057	2.19802	2.33605	2.90262	5.20403	9.831
97	4.14073	3.37619	7.94142	5.94253	5.93135	2.18725	2.32459	2.88839	5.17852	9.78281
98	4.12043	3.35964	7.90249	5.9134	5.90228	2.17653	2.3132	2.87423	5.15314	9.73486
99	4.10023	3.34317	7.86375	5.88442	5.87334	2.16586	2.30186	6.16014	5.12788	9.68714
100	4.08013	3.32678	7.82521	5.85557	5.84455	2.15524	2.29058	6.12995	5.10274	9.63965
101	4.06013	3.31048	7.78685	5.82687	5.8159	2.14468	2.27935	6.0999	5.07773	9.5924
102	4.04023	3.29425	7.74868	5.7983	5.78739	2.13416	2.26818	6.07	5.05284	9.54538
103	4.02042	3.2781	7.71069	5.76988	5.75902	2.1237	2.25706	6.04024	5.02807	9.49859
104	4.00072	3.26203	7.67289	5.7416	5.73079	2.11329	2.24599	6.01063	5.00342	9.45202
105	3.98111	3.24604	7.63528	5.71345	5.7027	2.10293	2.23498	5.98117	4.9789	9.40569
106	3.96159	6.53013	7.59785	5.68544	5.67475	2.09262	2.22403	5.95185	4.95449	9.35959
107	3.94217	6.49812	7.56061	5.65757	5.64693	2.08237	2.21312	5.92267	4.9302	9.3137
108	3.92285	6.46626	7.52355	5.62984	5.61925	2.07216	2.20228	5.89364	4.90603	9.26805
109	3.90362	6.43457	7.48667	5.60224	5.5917	2.062	2.19148	5.86475	4.88199	9.22262
110	3.88448	6.40303	7.44997	5.57478	5.56429	5.35189	2.18074	5.836	4.85805	9.17741
111	3.86544	6.37164	7.41345	5.54745	5.53702	5.32566	2.17005	5.80739	4.83424	9.13242
112	3.84649	6.3404	7.37711	5.52026	5.50987	5.29955	2.15941	5.77893	4.81054	9.08765
113	3.82764	6.30932	7.34095	5.4932	5.48286	5.27357	2.14883	5.7506	4.78696	9.04311
114	3.80887	6.2784	7.30496	5.46627	5.45599	5.24772	2.13829	5.72241	4.7635	8.99878
115	3.7902	6.24762	7.26915	5.43948	5.42924	5.222	2.12781	5.69436	4.74015	8.95467
116	3.77162	6.21699	7.23352	5.41281	5.40263	5.1964	2.11738	5.66644	4.71691	8.91077
117	3.75313	6.18652	7.19806	5.38628	5.37615	5.17093	2.107	5.63867	4.69379	8.86709
118	3.73474	6.15619	7.16278	5.35988	5.34979	5.14558	2.09667	5.61103	4.67078	8.82363
119	3.71643	6.12601	7.12767	5.3336	5.32357	5.12036	2.08639	5.58352	4.64788	8.78037
120	3.69821	6.09599	7.09273	5.30746	5.29747	5.09526	2.07617	5.55615	4.6251	8.73733
121	3.68008	6.0661	7.05796	5.28144	5.2715	5.07028	2.06599	5.52891	4.60243	8.6945
122	3.66204	6.03637	7.02336	5.25555	5.24566	5.04543	2.05586	5.50181	4.57987	8.65188
123	3.64409	6.00678	6.98893	5.22979	5.21995	5.02069	2.04578	5.47484	4.55742	8.60947
124	3.62623	5.97733	6.95467	5.20415	5.19436	4.99608	2.03576	5.44801	4.53508	8.56727
125	3.60845	5.94803	6.92058	5.17864	5.1689	4.97159	2.02578	5.4213	4.51285	8.52527
126	3.59076	5.91887	6.88666	5.15326	5.14356	4.94722	2.01585	5.39472	4.49072	8.48348
127	3.57316	5.88986	6.8529	5.128	5.11835	4.92297	2.00596	5.36828	4.46871	8.44189
128	3.55565	5.86099	6.81931	5.10286	5.09326	4.89884	1.99613	5.34196	4.4468	8.40051
129	3.53822	5.83226	6.78588	5.07784	5.06829	4.87482	1.98635	5.31578	4.42501	8.35933
130	3.52087	5.80367	6.75261	5.05295	5.04345	4.85093	1.97661	5.28972	4.40332	8.31836
131	3.50361	5.77522	6.71951	5.02818	5.01872	4.82715	1.96692	5.26379	4.38173	8.27758
132	3.48644	5.74691	6.68657	5.00354	4.99412	4.80349	5.25728	5.23799	4.36025	8.237
133	3.46935	5.71874	6.6538	4.97901	4.96964	4.77994	5.23151	5.21231	4.33888	8.19663
134	3.45234	5.69071	6.62118	4.9546	4.94528	4.75651	5.20586	5.18676	4.31761	8.15645
135	3.43542	5.66281	6.58872	4.93031	4.92104	4.73319	5.18034	5.16134	4.29644	8.11646
136	6.71858	5.63505	6.55642	4.90615	4.89692	4.70999	5.15495	5.13603	4.27538	8.07668
137	6.68565	5.60743	6.52429	4.8821	4.87291	4.6869	5.12968	5.11086	4.25443	8.03709
138	6.65287	5.57994	6.4923	4.85817	4.84902	4.66393	5.10454	5.0858	4.23357	7.99769
139	6.62026	5.55259	6.46048	4.83435	4.82525	4.64106	5.07951	5.06087	4.21282	7.95848
140	6.58781	5.52537	6.42881	4.81065	4.8016	4.61831	5.05461	5.03607	4.19217	7.91947
141	6.55551	5.49828	6.3973	4.78707	4.77806	4.59568	5.02984	5.01138	4.17162	7.88065
142	6.52338	5.47133	6.36594	4.76361	4.75464	4.57315	5.00518	4.98681	4.15117	7.84202
143	6.4914	5.44451	6.33473	4.74025	4.73133	4.55073	4.98064	8.26237	4.13082	7.80358
144	6.45958	5.41782	6.30368	4.71702	4.70814	4.52842	4.95623	8.22187	4.11057	7.76533
145	6.42792	5.39126	6.27278	4.69389	4.68506	4.50622	4.93193	11.4816	4.09042	7.72726
146	6.39641	5.36484	6.24203	4.67089	4.6621	4.48414	4.90776	11.4253	4.07037	7.68938
147	6.36505	5.33854	6.21143	4.64799	4.63924	4.46215	4.8837	11.3693	4.05042	7.65169
148	6.33385	5.31237	6.18098	4.6252	4.6165	4.44028	4.85976	11.3135	4.03056	7.61418
149	6.3028	5.28633	6.15068	4.60253	4.59387	4.41851	4.83594	11.2581	4.0108	7.57686
150	6.27191	5.26042	6.12053	4.57997	4.57135	4.39686	4.81223	11.2029	3.99114	7.53971
151	6.24116	5.23463	6.09053	4.55752	4.54894	4.3753	4.78864	11.148	3.97158	7.50276
152	6.21057	5.20897	6.06068	4.53518	4.52665	4.35385	4.76517	11.0933	3.95211	7.46598
153	6.18012	5.18343	6.03097	4.51295	4.50446	4.33251	4.74181	11.039	3.93274	7.42938
154	6.14983	5.15803	6.0014	4.49083	4.48238	4.31127	4.71857	10.9848	3.91346	7.39296
155	6.11968	5.13274	5.97198	4.46881	4.4604	4.29014	4.69544	10.931	3.89427	7.35672
156	6.08969	5.10758	5.94271	4.44691	4.43854	4.26911	4.67242	10.8774	3.87518	7.32066
157	6.05983	5.08254	5.91358	4.42511	4.41678	4.24818	4.64952	10.8241	3.85619	7.28477
158	6.03013	5.05763	5.88459	4.40342	4.39513	4.22736	4.62672	10.771	3.83729	7.24906
159	6.00057	5.03284	5.85574	4.38183	4.37359	4.20664	4.60404	10.7182	3.81848	7.21353
160	5.97115	5.00817	5.82704	4.36035	4.35215	4.18602	4.58148	10.6657	3.79976	7.17817
161	5.94188	4.98362	5.79848	4.33898	4.33081	4.1655	4.55902	10.6134	3.78113	7.14298
162	5.91276	4.95919	5.77005	4.31771	4.30958	4.14508	4.53667	10.5614	3.7626	7.10797
163	5.88377	4.93488	5.74177	4.29654	4.28846	4.12476	4.51443	10.5096	3.74415	7.07312
164	5.85493	4.91069	5.71362	4.27548	4.26744	4.10454	4.4923	10.4581	3.7258	7.03845
165	5.82623	4.88661	5.68561	4.25452	4.24652	4.08442	4.47028	10.4068	3.70753	7.00395
166	5.79767	4.86266	5.65774	4.23367	4.2257	4.0644	4.44837	10.3558	3.68936	6.96962
167	5.76925	4.83882	5.63001	4.21291	4.20499	4.04447	4.42656	10.3051	3.67128	6.93545
168	9.04097	4.8151	5.60241	4.19226	4.18437	4.02465	4.40486	10.2545	3.65328	6.90145
169	8.99665	4.7915	5.57495	4.17171	4.16386	4.00492	4.38327	10.2043	3.63537	6.86762
170	8.95255	4.76801	5.54762	4.15126	4.14345	3.98529	4.36178	10.1542	3.61755	6.83396
171	8.90867	4.74464	5.52043	4.13091	4.12314	3.96575	4.3404	10.1045	3.59982	6.80046
172	8.865	4.72138	5.49336	4.11066	4.10293	3.94631	4.31913	10.0549	3.58217	6.76712
173	8.82154	4.69824	5.46644	4.09051	4.08282	3.92697	4.29795	10.0057	3.56461	6.73395
174	8.7783	4.67521	5.43964	4.07046	4.0628	3.90772	4.27688	9.95661	3.54714	6.70094
175	8.73527	4.65229	5.41298	4.05051	4.04289	3.88856	4.25592	9.9078	3.52975	6.66809
176	8.69245	4.62948	5.38644	4.03065	4.02307	3.8695	4.23506	9.85923	3.51245	6.63541
177	8.64984	4.60679	5.36004	4.01089	4.00335	3.85053	4.2143	9.8109	3.49523	6.60288
178	8.60743	4.58421	5.33376	3.99123	3.98372	3.83166	4.19364	9.76281	3.4781	6.57051
179	8.56524	4.56174	5.30762	3.97167	3.96419	3.81287	4.17308	9.71495	3.46105	6.5383
180	8.52326	4.53938	5.2816	3.9522	3.94476	3.79418	4.15263	9.66733	3.44408	6.50625
181	8.48147	4.51712	5.25571	3.93283	3.92543	3.77558	4.13227	9.61994	3.4272	6.47436
182	8.4399	4.49498	5.22995	3.91355	3.90618	3.75708	4.11201	9.57278	3.4104	6.44262
183	8.39853	4.47295	5.20431	3.89436	3.88704	3.73866	4.09186	9.52586	3.39368	6.41104
184	8.35736	4.45102	5.1788	7.17527	7.16798	3.72033	4.0718	9.47916	3.37704	6.37962
185	8.31639	4.4292	5.15341	7.1401	7.13284	3.7021	4.05184	9.4327	3.36049	6.34834
186	8.27562	4.40749	5.12815	7.1051	7.09788	3.68395	4.03198	9.38646	3.34402	6.31722
187	8.23506	4.38588	5.10301	7.07027	7.06309	3.66589	4.01221	9.34045	3.32763	6.28626
188	8.19469	4.36439	5.078	7.03561	7.02846	3.64792	3.99254	9.29466	3.31131	6.25544
189	8.15452	4.34299	5.0531	7.00112	6.99401	3.63004	3.97297	9.2491	3.29508	6.22478
190	8.11455	4.3217	5.02833	6.96681	6.95973	3.61224	3.9535	9.20376	3.27893	6.19426
191	8.07477	4.30052	5.00369	6.93265	6.92561	3.59454	3.93412	9.15864	3.26286	6.1639
192	8.03519	4.27944	4.97916	6.89867	6.89166	3.57692	3.91483	9.11375	3.24686	6.13368
193	7.9958	4.25846	4.95475	6.86485	6.85788	3.55938	3.89564	9.06907	3.23095	6.10362
194	7.9566	4.23758	4.93046	6.8312	6.82426	3.54193	3.87655	9.02462	3.21511	6.0737
195	7.9176	4.21681	4.90629	6.79772	10.0908	3.52457	3.85754	8.98038	3.19935	6.04393
196	7.87879	4.19614	4.88224	6.76439	10.0413	3.50729	3.83863	8.93636	3.18366	6.0143
197	7.84017	4.17557	4.85831	6.73123	9.99212	3.4901	3.81982	8.89255	3.16806	5.98482
198	7.80173	4.1551	4.83449	6.69824	9.94314	3.47299	3.80109	8.84896	3.15253	5.95548
199	7.76349	4.13473	4.8108	6.6654	9.8944	3.45597	3.78246	8.80558	3.13707	5.92629
200	7.72543	4.11447	4.78721	6.63273	9.8459	3.43903	3.76392	8.76242	3.1217	5.89723
201	7.68756	4.0943	4.76375	6.60022	9.79763	3.42217	3.74547	8.71946	3.10639	5.86833
202	7.64988	4.07423	4.7404	6.56786	9.74961	3.40539	3.72711	8.67672	3.09117	5.83956
203	7.61238	4.05426	4.71716	6.53567	9.70181	3.3887	3.70884	8.63419	3.07601	5.81094
204	7.57507	4.03438	4.69403	6.50363	9.65425	3.37209	3.69066	8.59186	3.06094	5.78245
205	7.53793	4.01461	4.67102	6.47175	9.60693	3.35556	3.67257	8.54975	3.04593	5.7541
206	7.50098	3.99493	4.64813	6.44003	9.55984	3.33911	3.65456	8.50784	3.031	5.7259
207	7.46421	3.97534	4.62534	6.40846	9.51298	3.32274	3.63665	8.46613	3.01614	5.69783
208	7.42762	3.95586	4.60267	6.37704	9.46634	3.30646	3.61882	8.42463	3.00136	5.6699
209	7.39121	3.93646	4.58011	6.34578	9.41994	3.29025	3.60108	8.38333	2.98664	5.64211
210	7.35498	3.91717	4.55766	6.31468	9.37376	3.27412	3.58343	8.34224	2.972	5.61445
211	7.31893	3.89797	4.53531	6.28372	9.32781	3.25807	3.56586	8.30135	2.95744	5.58693
212	7.28305	3.87886	4.51308	6.25292	9.28209	3.2421	3.54838	8.26065	2.94294	5.55954
213	7.24735	3.85985	4.49096	6.22227	9.23659	3.22621	3.53099	8.22016	2.92851	5.53229
214	7.21182	3.84092	4.46894	6.19177	9.19131	3.21039	3.51368	8.17986	2.91416	5.50517
215	7.17647	3.8221	4.44704	6.16141	9.14626	3.19465	3.49646	8.13977	2.89987	5.47818
216	7.14129	3.80336	4.42524	6.13121	9.10142	3.17899	3.47932	8.09987	2.88566	5.45133
217	7.10629	3.78472	4.40355	6.10116	9.05681	3.16341	3.46226	8.06016	2.87151	5.42461
218	7.07145	3.76616	4.38196	6.07125	9.01241	3.1479	3.44529	8.02065	2.85744	5.39802
219	7.03679	3.7477	4.36048	6.04149	8.96823	3.13247	3.4284	7.98133	2.84343	5.37155
220	7.00229	3.72933	4.33911	6.01187	8.92427	3.11712	3.4116	7.94221	2.82949	5.34522
221	6.96797	3.71105	4.31784	5.9824	8.88052	3.10184	3.39487	7.90328	2.81562	5.31902
222	6.93381	3.69286	4.29667	5.95308	8.83699	3.08663	3.37823	7.86454	2.80182	5.29295
223	6.89982	3.67476	4.27561	5.9239	8.79367	3.0715	3.36167	7.82598	2.78808	5.267
224	6.866	3.65674	4.25465	5.89486	8.75057	3.05645	3.34519	7.78762	2.77442	5.24118
225	6.83234	3.63882	4.23379	5.86596	8.70767	3.04146	3.32879	7.74945	2.76082	5.21549
226	6.79885	3.62098	4.21304	5.83721	11.965	3.02655	3.31248	7.71146	2.74728	5.18992
227	6.76552	3.60323	4.19239	5.80859	11.9063	3.01172	3.29624	7.67366	2.73382	5.16448
228	6.73236	3.58557	4.17184	5.78012	11.848	2.99695	3.28008	7.63604	2.72041	5.13917
229	6.69936	3.56799	4.15139	5.75178	11.7899	2.98226	3.264	7.59861	2.70708	5.11398
230	6.66652	3.5505	4.13104	5.72359	11.7321	2.96764	3.248	7.56136	2.69381	5.08891
231	6.63384	3.5331	4.11079	5.69553	11.6746	2.9531	3.23208	7.5243	2.6806	5.06396
232	6.60132	3.51578	4.09063	5.66761	11.6174	2.93862	3.21624	7.48741	2.66746	5.03914
233	6.56896	3.49854	4.07058	5.63983	11.5604	2.92422	3.20047	7.45071	2.65439	5.01444
234	6.53676	3.48139	4.05063	5.61218	11.5037	2.90988	3.18478	7.41419	2.64138	4.98986
235	6.50472	3.46433	4.03077	5.58467	11.4474	2.89562	3.16917	7.37784	2.62843	4.9654
236	6.47283	3.44735	4.01101	5.5573	11.3912	2.88142	3.15364	7.34168	2.61554	4.94106
237	6.4411	3.43045	3.99135	5.53006	11.3354	2.8673	3.13818	7.30569	2.60272	4.91684
238	6.40953	3.41363	3.97179	5.50295	11.2798	2.85324	3.12279	7.26988	2.58996	4.89273
239	6.37811	3.3969	3.95232	5.47597	11.2245	2.83926	3.10749	7.23424	2.57727	4.86875
240	6.34684	3.38025	3.93294	5.44913	11.1695	2.82534	3.09225	7.19878	2.56463	4.84488
241	6.31573	3.36368	3.91366	5.42242	11.1148	2.81149	3.07709	7.16349	2.55206	4.82113
242	6.28477	3.34719	3.89448	5.39584	11.0603	2.79771	3.06201	7.12837	2.53955	4.7975
243	6.25396	3.33078	3.87539	5.36939	11.0061	2.78399	3.047	7.09343	2.5271	4.77398
244	6.22331	3.31445	3.85639	5.34307	10.9521	2.77035	3.03206	7.05866	2.51472	4.75058
245	9.4928	3.29821	3.83749	5.31688	10.8984	2.75677	3.0172	7.02406	2.50239	4.72729
246	9.44627	3.28204	3.81868	5.29081	10.845	2.74325	3.00241	6.98963	2.49012	4.70412
247	9.39996	3.26595	3.79996	8.56488	10.7918	2.7298	2.98769	6.95536	2.47792	4.68106
248	9.35388	3.24994	3.78133	8.52289	10.7389	2.71642	2.97305	6.92127	2.46577	4.65812
249	9.30803	3.23401	3.76279	8.48111	10.6863	2.70311	2.95847	6.88734	2.45368	4.63528
250	9.2624	3.21816	3.74435	8.43954	10.6339	2.68986	2.94397	6.85358	2.44165	4.61256
251	9.217	3.20238	3.72599	8.39817	10.5818	2.67667	2.92954	6.81998	2.42969	4.58995
252	9.17182	3.18668	3.70773	8.357	10.5299	2.66355	2.91518	6.78655	2.41778	4.56745
253	9.12686	3.17106	3.68955	8.31604	10.4783	2.65049	2.90089	6.75328	2.40592	4.54506
254	9.08212	3.15552	3.67147	8.27527	10.4269	2.6375	2.88667	6.72018	2.39413	4.52278
255	9.0376	3.14005	3.65347	8.23471	10.3758	2.62457	2.87252	6.68724	2.38239	4.50061
256	8.9933	3.12466	3.63556	8.19434	10.325	2.61171	2.85844	6.65446	2.37072	4.47855
257	8.94921	3.10934	3.61774	8.15417	10.2743	2.5989	2.84443	6.62184	2.35909	4.45659
258	8.90534	3.0941	3.60001	8.1142	10.224	2.58616	2.83048	6.58938	2.34753	4.43475
259	8.86169	6.37893	3.58236	8.07443	10.1739	2.57349	2.81661	6.55708	2.33602	4.41301
260	8.81825	6.34766	3.5648	8.03484	10.124	2.56087	2.8028	6.52493	2.32457	4.39138
261	8.77502	6.31655	3.54732	7.99546	10.0744	2.54832	2.78906	6.49295	2.31318	4.36985
262	8.73201	6.28558	3.52994	7.95626	10.025	2.53583	2.77539	6.46112	2.30184	4.34843
263	8.6892	6.25477	3.51263	7.91726	9.97584	2.5234	2.76179	6.42945	2.29055	4.32711
264	8.64661	6.22411	3.49541	7.87845	9.92694	2.51103	2.74825	6.39793	2.27933	4.3059
265	8.60422	6.1936	3.47828	7.83983	9.87828	2.49872	2.73478	6.36657	2.26815	4.28479
266	8.56205	6.16324	3.46123	7.8014	9.82985	2.48647	2.72137	6.33536	2.25703	4.26379
267	8.52008	6.13303	3.44426	7.76316	9.78167	2.47428	2.70803	6.30431	2.24597	4.24289
268	8.47831	6.10296	3.42738	7.72511	9.73372	2.46215	2.69476	6.2734	2.23496	4.22209
269	8.43675	6.07305	3.41058	7.68724	9.686	2.45008	2.68155	6.24265	2.22401	4.20139
270	8.39539	6.04328	3.39386	7.64956	9.63852	2.43807	2.6684	6.21205	2.2131	4.1808
271	8.35424	6.01365	3.37722	7.61206	9.59128	2.42612	2.65532	6.1816	2.20225	4.16031
272	8.31329	5.98417	3.36067	7.57474	9.54426	2.41423	2.6423	6.1513	2.19146	4.13991
273	8.27254	5.95484	3.34419	7.53761	9.49747	2.40239	2.62935	6.12114	2.18072	4.11962
274	8.23199	5.92565	3.3278	7.50066	9.45092	2.39062	2.61646	6.09114	2.17003	4.09942
275	8.19163	5.8966	3.31149	7.4639	9.40459	2.3789	2.60364	6.06128	2.15939	4.07933
276	8.15148	5.8677	3.29525	7.42731	9.35849	2.36724	2.59087	6.03157	2.1488	4.05933
277	8.11152	5.83893	3.2791	7.3909	9.31261	2.35563	2.57817	6.002	2.13827	4.03943
278	8.07176	5.81031	3.26303	7.35467	9.26696	2.34409	2.56554	5.97258	2.12779	4.01963
279	8.03219	5.78183	3.24703	7.31862	9.22154	2.3326	2.55296	5.9433	2.11736	3.99993
280	7.99282	5.75349	3.23112	7.28274	9.17633	2.32116	2.54045	5.91417	2.10698	3.98032
281	7.95364	5.72528	3.21528	7.24704	9.13135	2.30978	2.52799	5.88518	2.09665	3.96081
282	7.91465	5.69722	3.19952	7.21152	9.08659	2.29846	2.5156	5.85633	2.08637	3.94139
283	7.87585	5.66929	3.18383	7.17617	9.04205	2.28719	2.50327	5.82762	2.07615	3.92207
284	7.83724	5.6415	3.16822	7.14099	8.99773	2.27598	2.491	5.79905	2.06597	3.90285
285	7.79882	5.61385	3.15269	7.10598	8.95362	2.26483	2.47879	5.77063	2.05584	3.88372
286	7.7606	5.58633	3.13724	7.07115	8.90973	2.25372	2.46664	5.74234	2.04576	3.86468
287	7.72255	5.55894	3.12186	7.03649	8.86605	2.24268	2.45454	5.71419	2.03574	3.84573
288	7.6847	5.53169	3.10656	7.002	8.82259	2.23168	2.44251	5.68618	2.02576	3.82688
289	7.64703	5.50458	3.09133	6.96767	8.77934	2.22074	2.43054	5.65831	2.01583	3.80812
290	7.60954	5.47759	3.07618	6.93352	8.73631	2.20986	2.41863	5.63057	2.00595	3.78946
291	7.57224	5.45074	3.0611	6.89953	8.69348	2.19902	2.40677	5.60297	1.99611	3.77088
292	7.53512	5.42402	3.04609	6.86571	8.65087	2.18824	2.39497	5.5755	1.98633	3.75239
293	7.49818	5.39744	3.03116	6.83205	8.60846	2.17752	2.38323	5.54817	1.97659	3.734
294	7.46143	8.67098	3.0163	6.79856	8.56626	2.16684	2.37155	5.52097	1.9669	3.7157
295	7.42485	8.62847	3.00151	6.76524	8.52427	2.15622	2.35992	5.49391	1.95726	3.69748
296	7.38846	8.58618	2.9868	6.73207	8.48249	2.14565	2.34836	5.46698	1.94767	3.67936
297	7.35224	8.54409	2.97216	6.69907	8.44091	2.13513	5.63684	5.44018	1.93812	3.66132
298	7.3162	8.5022	2.95759	6.66623	8.39953	2.12467	5.60921	5.41351	1.92862	3.64337
299	7.28033	8.46053	2.94309	6.63356	8.35835	2.11425	5.58172	5.38698	1.91916	3.62551
300	7.24465	8.41905	2.92867	6.60104	8.31738	2.10389	5.55435	5.36057	1.90976	3.60774
301	10.5091	8.37778	2.91431	6.56868	8.27661	2.09358	5.52713	5.33429	1.90039	3.59006
302	10.4576	8.33672	2.90002	6.53648	8.23604	2.08331	5.50003	5.30814	1.89108	3.57246
303	10.4064	8.29585	2.88581	6.50444	8.19567	2.0731	5.47307	5.28212	1.88181	3.55495
304	10.3553	8.25518	2.87166	6.47256	8.15549	2.06294	5.44624	5.25623	1.87258	3.53752
305	10.3046	8.21472	2.85759	6.44083	8.11551	2.05283	5.41955	5.23047	1.8634	3.52018
306	10.2541	8.17445	2.84358	6.40925	8.07573	2.04276	5.39298	5.20483	1.85427	3.50292
307	10.2038	8.13438	2.82964	6.37784	8.03614	2.03275	5.36654	5.17931	1.84518	3.48575
308	10.1538	8.0945	2.81577	6.34657	7.99675	2.02278	5.34024	5.15392	1.83614	3.46867
309	10.104	8.05483	2.80196	6.31546	7.95755	2.01287	5.31406	5.12866	1.82713	3.45166
310	10.0545	8.01534	2.78823	6.2845	7.91854	2.003	5.28801	5.10352	1.81818	3.43474
311	10.0052	7.97605	2.77456	6.2537	7.87973	1.99318	5.26209	5.0785	1.80927	3.41791
312	13.2562	7.93695	2.76096	9.52304	7.8411	1.98341	5.23629	5.05361	1.8004	3.40115
313	13.1912	7.89805	2.74743	9.47636	7.80267	1.97369	5.21063	5.02883	1.79157	3.38448
314	13.1265	7.85933	2.73396	9.42991	7.76442	1.96402	5.18508	5.00418	1.78279	3.36789
315	13.0622	7.8208	2.72056	9.38368	7.72636	1.95439	5.15967	4.97965	1.77405	3.35138
316	12.9981	7.78247	2.70722	9.33768	7.68848	1.94481	5.13437	4.95524	1.76535	3.33495
317	12.9344	7.74432	2.69395	9.29191	7.65079	1.93527	5.10921	4.93095	1.7567	3.3186
318	12.871	7.70635	2.68075	9.24636	7.61329	5.22579	5.08416	4.90678	1.74809	3.30234
319	12.8079	7.66858	2.6676	9.20104	7.57597	5.20017	5.05924	4.88273	1.73952	3.28615
320	12.7451	7.63099	2.65453	9.15593	7.53883	5.17468	5.03444	4.85879	1.73099	3.27004
321	12.6827	7.59358	2.64152	9.11105	7.50188	5.14931	5.00976	4.83498	1.72251	3.25401
322	12.6205	7.55636	2.62857	9.06639	7.4651	5.12407	4.9852	4.81127	1.71406	3.23806
323	12.5586	7.51932	2.61568	9.02195	7.42851	5.09895	4.96076	4.78769	1.70566	3.22219
324	12.4971	7.48246	2.60286	8.97772	7.39209	5.07396	4.93645	4.76422	1.6973	3.20639
325	12.4358	7.44578	2.5901	8.93371	7.35586	5.04909	4.91225	4.74087	1.68898	3.19067
326	12.3748	7.40928	2.5774	8.88992	7.3198	5.02434	4.88817	4.71763	1.6807	3.17503
327	12.3142	7.37296	2.56477	8.84634	7.28392	4.99971	4.86421	4.6945	1.67246	3.15947
328	12.2538	7.33682	2.5522	8.80298	7.24821	4.9752	4.84036	4.67149	1.66426	3.14398
329	12.1937	7.30085	2.53969	8.75983	7.21268	4.95081	4.81664	4.64859	1.65611	3.12857
330	12.134	7.26506	2.52724	8.71689	7.17733	4.92654	4.79303	4.6258	1.64799	3.11323
331	12.0745	7.22945	2.51485	8.67416	7.14214	4.90239	4.76953	4.60313	1.63991	3.09797
332	12.0153	7.19401	2.50252	8.63164	7.10713	4.87836	4.74615	4.58056	1.63187	3.08279
333	11.9564	7.15875	2.49025	8.58932	7.0723	4.85445	4.72288	4.55811	1.62387	3.06767
334	11.8978	7.12366	2.47805	8.54722	7.03763	4.83065	4.69973	4.53577	1.61591	3.05264
335	11.8395	7.08874	2.4659	8.50532	7.00313	4.80697	4.6767	4.51353	1.60799	3.03767
336	11.7814	7.05399	2.45381	8.46363	6.9688	4.78341	4.65377	4.49141	1.60011	3.02278
337	11.7237	7.01941	2.44178	8.42214	6.93464	4.75996	4.63096	4.46939	1.59226	3.00796
338	11.6662	6.985	2.42981	8.38086	10.2006	4.73663	4.60826	4.44748	1.58446	2.99322
339	11.609	6.95076	2.4179	8.33977	10.1506	4.71341	4.58567	4.42568	1.57669	2.97855
340	11.5521	6.91669	2.40605	8.29889	10.1009	4.6903	4.56319	4.40398	1.56896	2.96395
341	11.4955	6.88278	2.39426	8.25821	10.0514	4.66731	4.54082	4.3824	1.56127	2.94942
342	11.4391	6.84904	5.68252	8.21773	10.0021	4.64443	4.51856	4.36091	1.55362	2.93496
343	11.3831	6.81547	5.65466	8.17745	9.95307	4.62167	4.49641	4.33954	1.546	2.92057
344	11.3273	6.78206	5.62694	8.13736	9.90428	4.59901	4.47437	4.31826	1.53842	2.90626
345	11.2717	6.74881	5.59936	8.09747	9.85573	4.57647	4.45244	4.2971	1.53088	2.89201
346	11.2165	6.71573	5.57191	8.05778	9.80742	4.55403	4.43061	4.27603	1.52338	2.87783
347	11.1615	6.68281	5.5446	8.01828	9.75934	4.53171	4.40889	4.25507	1.51591	2.86373
348	11.1068	6.65005	5.51742	7.97897	9.7115	4.50949	4.38728	4.23421	1.50848	2.84969
349	11.0524	6.61745	5.49037	7.93986	9.6639	4.48739	4.36577	4.21346	1.50109	2.83572
350	10.9982	6.58502	5.46346	7.90094	9.61652	4.46539	4.34437	4.1928	1.49373	2.82182
351	10.9443	6.55274	5.43668	7.86221	9.56938	4.4435	4.32308	4.17225	1.48641	2.80799
352	10.8906	6.52061	5.41003	7.82367	9.52248	4.42172	4.30189	4.1518	1.47912	2.79422
353	10.8372	6.48865	5.38351	7.78532	9.4758	4.40005	4.2808	4.13145	1.47187	2.78052
354	10.7841	6.45684	5.35712	7.74716	9.42935	4.37848	4.25981	4.11119	1.46465	2.76689
355	10.7312	6.42519	5.33086	7.70918	9.38312	4.35701	4.23893	4.09104	1.45747	2.75333
356	10.6786	6.3937	5.30473	7.67139	9.33713	4.33566	4.21815	4.07099	1.45033	2.73983
357	10.6263	6.36236	5.27872	7.63378	9.29136	4.3144	4.19748	4.05103	1.44322	2.7264
358	10.5742	6.33117	5.25285	7.59636	9.24581	4.29325	4.1769	4.03117	1.43614	2.71304
359	10.5224	6.30013	5.2271	7.55913	9.20049	4.27221	4.15643	4.01141	1.4291	2.69974
360	10.4708	6.26925	5.20148	7.52207	9.15539	4.25127	4.13605	3.99175	1.4221	2.68651
361	10.4195	6.23852	5.17598	7.4852	9.11051	4.23043	4.11578	3.97218	1.41513	2.67334
362	10.3684	6.20794	5.15061	7.44851	9.06585	4.20969	4.0956	3.95271	1.40819	2.66023
363	10.3176	6.17751	5.12536	7.41199	9.02141	4.18905	4.07552	3.93333	1.40129	2.64719
364	10.267	9.44722	5.10023	7.37566	8.97719	4.16852	4.05555	3.91405	1.39442	2.63421
365	10.2167	9.40091	5.07523	7.33951	8.93318	4.14809	4.03567	3.89487	1.38758	2.6213
366	10.1666	9.35483	5.05035	7.30353	8.88939	4.12775	4.01588	3.87577	1.38078	2.60845
367	10.1167	9.30897	5.0256	7.26773	8.84582	4.10752	3.9962	3.85677	1.37401	2.59567
368	10.0671	9.26334	5.00096	7.2321	8.80245	4.08738	3.97661	3.83787	1.36728	2.58294
369	10.0178	9.21793	4.97645	7.19665	8.7593	4.06735	3.95711	3.81906	1.36058	2.57028
370	9.96869	9.17275	4.95205	7.16137	8.71637	4.04741	3.93772	3.80034	1.35391	2.55768
371	9.91982	9.12778	4.92778	7.12627	8.67364	4.02757	3.91841	3.78171	1.34727	2.54514
372	9.87119	9.08304	4.90362	7.09133	8.63112	4.00783	3.89921	3.76317	1.34067	2.53267
373	9.82281	9.03851	4.87959	7.05657	8.58881	3.98818	3.88009	3.74472	1.33409	2.52025
374	9.77465	8.99421	4.85567	7.02198	8.54671	3.96863	3.86107	3.72636	1.32755	2.5079
375	9.72674	8.95012	4.83186	6.98756	8.50481	3.94918	3.84215	3.7081	1.32105	2.4956
376	9.67906	8.90624	4.80818	6.95331	8.46312	3.92982	3.82331	3.68992	1.31457	2.48337
377	9.63161	8.86259	4.78461	6.91922	8.42164	3.91055	3.80457	3.67183	1.30813	2.4712
378	9.5844	8.81914	4.76115	6.8853	8.38036	3.89138	3.78592	3.65383	1.30171	2.45908
379	9.53742	8.77591	4.73782	6.85155	8.33928	3.87231	3.76736	3.63592	1.29533	2.44703
380	9.49067	8.73289	4.71459	6.81797	8.2984	3.85333	3.74889	3.6181	1.28898	2.43503
381	9.44414	8.69008	4.69148	6.78455	8.25772	3.83444	3.73052	3.60036	1.28267	2.4231
382	9.39785	8.64749	4.66848	6.75129	8.21724	3.81564	3.71223	3.58272	1.27638	2.41122
383	9.35178	8.6051	4.6456	6.71819	8.17696	3.79694	3.69403	3.56515	1.27012	2.3994
384	9.30594	8.56291	4.62283	6.68526	8.13688	3.77832	3.67593	3.54768	1.26389	2.38764
385	9.26032	8.52094	4.60016	6.65249	8.09699	3.7598	3.65791	3.53029	1.2577	2.37593
386	9.21493	8.47917	4.57761	6.61988	8.0573	3.74137	3.63998	3.51298	1.25153	2.36429
387	9.16976	8.43761	4.55518	6.58743	8.0178	3.72303	3.62213	3.49576	1.2454	2.3527
388	9.12481	8.39624	4.53285	6.55514	7.9785	3.70478	3.60438	3.47862	1.23929	2.34117
389	9.08008	8.35509	4.51063	6.52301	7.93939	3.68662	3.58671	3.46157	1.23322	2.32969
390	9.03557	8.31413	4.48852	6.49103	7.90047	3.66855	3.56913	3.4446	1.22717	2.31827
391	8.99127	8.27337	4.46651	6.45921	7.86174	3.65057	3.55163	3.42772	1.22116	2.3069
392	8.9472	8.23282	4.44462	6.42755	7.8232	3.63267	3.53422	3.41092	1.21517	2.2956
393	8.90334	8.19246	4.42283	6.39604	7.78486	3.61486	3.5169	3.3942	1.20922	2.28434
394	8.8597	8.1523	4.40115	6.36469	7.74669	3.59714	3.49966	3.37756	1.20329	2.27315
395	8.81627	8.11234	4.37958	6.33349	7.70872	3.57951	3.4825	3.361	1.19739	2.262
396	8.77305	8.07257	4.35811	6.30244	7.67093	3.56197	3.46543	3.34453	1.19152	2.25091
397	8.73004	8.033	4.33674	6.27155	7.63333	3.5445	3.44844	3.32813	1.18568	2.23988
398	8.68725	7.99363	4.31549	6.2408	7.59591	3.52713	3.43154	3.31182	1.17987	2.2289
399	8.64467	7.95444	4.29433	6.21021	7.55868	3.50984	3.41472	6.59558	1.17408	2.21798
400	8.60229	7.91545	4.27328	6.17977	7.52162	3.49263	3.39798	6.56325	1.16833	2.2071
401	8.56012	7.87665	4.25233	6.14948	10.7848	3.47551	3.38132	6.53108	1.1626	2.19628
402	8.51816	7.83804	4.23149	6.11933	10.7319	3.45848	3.36475	6.49906	1.1569	2.18552
403	8.4764	7.79961	4.21075	6.08934	10.6793	3.44152	3.34825	6.4672	1.15123	2.1748
404	8.43485	7.76138	4.1901	6.05949	10.6269	3.42465	3.33184	6.4355	1.14559	2.16414
405	8.39351	7.72334	4.16957	6.02978	10.5748	3.40787	3.31551	6.40396	1.13997	2.15353
406	8.35236	7.68548	4.14913	6.00022	10.523	3.39116	3.29925	6.37256	1.13438	2.14298
407	8.31142	7.6478	4.12879	5.97081	10.4714	3.37454	3.28308	6.34133	1.12882	2.13247
408	8.27068	7.61031	4.10855	5.94154	10.4201	3.358	3.26699	6.31024	1.12329	2.12202
409	8.23013	7.57301	4.08841	5.91242	10.369	3.34153	3.25097	6.27931	1.11778	2.11162
410	8.18979	7.53588	4.06837	5.88344	10.3182	3.32515	3.23504	6.24853	1.1123	2.10127
411	8.14964	7.49894	4.04842	5.8546	10.2676	3.30885	3.21918	6.2179	1.10685	2.09097
412	8.10969	7.46218	4.02858	5.8259	10.2173	3.29264	3.2034	6.18742	1.10143	2.08072
413	8.06994	7.42561	4.00883	5.79734	10.1672	3.27649	3.1877	6.15709	1.09603	2.07052
414	8.03038	7.3892	3.98918	5.76892	10.1173	3.26043	3.17207	6.12691	1.09065	2.06037
415	7.99102	7.35298	3.96962	5.74064	10.0677	3.24445	3.15652	6.09687	1.08531	2.05027
416	7.95185	7.31694	3.95017	5.7125	10.0184	3.22855	3.14105	6.06699	1.07999	2.04022
417	7.91287	7.28107	3.9308	5.6845	9.96929	3.21272	3.12565	6.03725	1.07469	2.03022
418	7.87408	7.24538	3.91153	5.65663	9.92042	3.19697	3.11033	6.00765	1.06943	2.02026
419	7.83548	7.20986	3.89236	5.6289	9.87179	3.1813	3.09508	5.9782	1.06418	2.01036
420	7.79707	7.17452	3.87328	5.60131	9.8234	3.16571	3.07991	5.9489	1.05897	2.00051
421	7.75885	7.13935	3.85429	5.57385	9.77524	3.15019	3.06481	5.91974	1.05378	1.9907
422	7.72082	7.10436	3.8354	5.54653	9.72733	3.13475	3.04979	5.89072	1.04861	1.98094
423	7.68297	7.06953	3.8166	5.51934	9.67964	3.11938	3.03484	5.86184	1.04347	1.97123
424	7.64531	7.03488	3.79789	5.49229	9.63219	3.10409	3.01996	5.83311	1.03835	1.96157
425	7.60783	7.00039	3.77927	5.46536	9.58498	3.08887	3.00516	5.80451	1.03326	1.95195
426	7.57054	6.96608	3.76075	5.43857	9.53799	3.07373	2.99043	5.77606	1.0282	1.94238
427	7.53343	6.93193	3.74231	8.71191	9.49124	3.05866	2.97577	5.74775	1.02316	1.93286
428	7.4965	6.89795	3.72397	8.66921	9.44471	3.04367	2.96118	5.71957	1.01814	1.92339
429	7.45975	6.86413	3.70571	8.62671	9.39841	3.02875	2.94667	5.69153	1.01315	1.91396
430	7.42318	6.83049	3.68755	8.58442	9.35234	3.0139	2.93222	5.66363	1.00819	1.90458
431	7.3868	6.797	3.66947	8.54234	9.3065	2.99913	2.91785	5.63587	1.00324	1.89524
432	7.35059	6.76369	3.65148	8.50047	9.26088	2.98443	2.90354	5.60824	0.998327	1.88595
433	7.31455	6.73053	3.63358	8.4588	9.21548	2.9698	2.88931	5.58075	0.993433	1.87671
434	7.2787	6.69754	3.61577	8.41734	9.17031	2.95524	2.87515	5.5534	0.988563	1.86751
435	7.24302	6.66471	3.59805	8.37607	9.12536	2.94075	2.86105	5.52617	0.983717	1.85835
436	7.20751	6.63204	3.58041	8.33501	9.08062	2.92634	2.84703	5.49908	0.978895	1.84924
437	7.17218	6.59953	6.86286	8.29416	9.03611	2.91199	2.83307	5.47213	0.974097	1.84018
438	7.13702	6.56718	6.82922	8.2535	8.99182	2.89772	2.81919	5.4453	0.969322	1.83116
439	7.10204	6.53498	6.79574	8.21304	8.94774	2.88351	2.80537	5.41861	0.96457	1.82218
440	7.06722	6.50295	6.76243	8.17278	8.90388	2.86938	2.79161	5.39205	0.959842	1.81325
441	7.03258	6.47107	6.72928	8.13272	8.86023	2.85531	2.77793	5.36562	0.955137	1.80436
442	6.99811	6.43935	6.69629	8.09285	8.8168	2.84132	2.76431	5.33932	0.950455	1.79552
443	6.9638	6.40779	6.66347	8.05318	8.77358	2.82739	2.75076	5.31314	0.945796	1.78671
444	6.92967	6.37637	6.6308	8.0137	8.73057	2.81353	2.73728	5.2871	0.941159	1.77796
445	6.8957	6.34512	6.5983	7.97442	8.68777	2.79974	2.72386	5.26118	0.936546	1.76924
446	6.8619	6.31401	6.56595	7.93533	8.64519	2.78601	2.71051	5.23539	0.931955	1.76057
447	6.82826	6.28306	6.53377	7.89643	8.60281	2.77236	2.69722	5.20973	0.927386	1.75194
448	6.79479	6.25226	6.50174	7.85772	8.56064	2.75877	2.684	5.18419	0.92284	1.74335
449	6.76148	6.22162	6.46987	7.81921	8.51867	2.74524	2.67084	5.15878	0.918317	1.7348
450	6.72833	6.19112	6.43815	7.78088	8.47692	2.73179	2.65775	5.13349	0.913815	1.7263
451	6.69535	6.16077	6.40659	7.74274	8.43536	2.71839	2.64472	5.10832	0.909336	1.71784
452	6.66253	6.13057	6.37519	7.70478	8.39401	2.70507	2.63176	5.08328	0.904878	1.70942
453	6.62987	6.10052	6.34394	7.66701	8.35287	2.69181	2.61886	5.05836	0.900442	1.70104
454	6.59737	6.07061	6.31284	7.62943	8.31192	2.67861	2.60602	5.03357	0.896029	1.6927
455	6.56503	6.04085	6.2819	7.59203	8.27118	2.66548	2.59324	5.00889	0.891636	1.6844
456	6.53285	6.01124	6.2511	7.55481	8.23063	2.65242	2.58053	4.98434	0.887265	1.67614
457	6.50083	5.98178	6.22046	10.8178	8.19028	2.63942	2.56788	4.95991	0.882916	1.66793
458	6.46896	5.95245	6.18997	10.7648	8.15014	2.62648	2.5553	4.93559	0.878588	1.65975
459	6.43725	5.92327	6.15962	10.712	8.11018	2.6136	2.54277	4.9114	0.874281	1.65162
460	6.4057	5.89424	6.12943	10.6595	8.07043	2.60079	2.5303	4.88733	0.869996	1.64352
461	6.3743	5.86535	6.09938	10.6072	8.03087	2.58804	2.5179	4.86337	0.865731	1.63546
462	6.34305	5.83659	6.06948	10.5552	7.9915	2.57536	2.50556	4.83953	0.861487	1.62745
463	6.31196	5.80798	6.03973	10.5035	7.95233	2.56273	2.49328	4.8158	0.857264	1.61947
464	6.28101	5.77951	6.01013	10.452	7.91334	2.55017	2.48105	4.7922	0.853062	1.61153
465	6.25022	5.75118	5.98066	10.4008	7.87455	2.53767	2.46889	4.76871	0.84888	1.60363
466	6.21959	5.72299	5.95135	10.3498	7.83595	2.52523	2.45679	4.74533	0.844719	1.59577
467	6.1891	5.69494	5.92217	10.299	7.79754	2.51285	2.44475	4.72207	0.840578	1.58795
468	6.15876	5.66702	5.89314	10.2486	7.75932	2.50053	2.43276	4.69892	0.836458	1.58016
469	6.12857	5.63924	5.86426	10.1983	7.72128	2.48827	2.42084	4.67589	0.832357	1.57242
470	6.09853	5.6116	5.83551	10.1483	7.68343	2.47608	2.40897	4.65297	0.828277	1.56471
471	6.06863	5.58409	5.8069	10.0986	7.64577	2.46394	2.39716	4.63016	0.824217	1.55704
472	6.03888	5.55672	5.77844	10.0491	7.60829	2.45186	2.38541	4.60746	0.820177	1.54941
473	6.00928	5.52948	5.75011	9.99982	7.57099	2.43984	2.37372	4.58488	0.816156	1.54181
474	5.97983	5.50237	5.72193	9.9508	7.53388	2.42788	2.36208	4.5624	0.812156	1.53425
[truncated: 9,525 more rows]

## Sheet: Supplement_ge
	0	1	2	3	4	5	6	7	8	9
[truncated: 10,000 more rows]

## Sheet: Supplement_volt
	0	1	2	3	4	5	6	7	8	9
[truncated: 10,000 more rows]

## Sheet: Fig 5B
Figure 5B - F-I Curves - Ex Vivo vs In Silico
[truncated: 17 more rows]

[truncated: 6 more sheets: Fig 5D 5G 5K 5O 5P, Fig 5E, Fig 5F, Fig 5H 5I 5J, Fig 5L 5M 5N, Fig 5Q]
