# Supplementary material for: State-dependent activity dynamics of hypothalamic stress effector neurons
Source: eLife. 2022 Jun 30;11:e76832. doi: 10.7554/eLife.76832 (PMC9278954; doi:10.7554/eLife.76832)
Supplement: Figure 6—source data 1. [file elife-76832-fig6-data1.xlsx]

## Sheet: Fig 6B 6C 6D
Figure 6B - ISI Time Course - In Silico - Rep Model			Figure 6C - ISI Time Course - Ex Vivo - Rep Cell			Figure 6D: Overlay of 6B & 6C
Time (s)	ISI (ms)		Time (s)	ISI (ms)
0.5813	215.3		0.8065	512.8
0.59	512.9		1.319	7
0.8053	5.5		1.3259	157.6
1.3182	7.6		1.4837	74.1
1.3237	157.6		1.5578	490
1.3313	16.6		2.0477	8.1
1.4889	56.7		2.0558	160.2
1.5055	11.8		2.2161	58.3
1.5622	128.5		2.2745	227.4
1.574	342.8		2.5019	509.6
1.7025	6		3.0114	54.6
2.0453	225.6		3.0659	4.6
2.0513	227.5		3.0703	5.9
2.2769	510.3		3.0759	55.3
2.5044	14		3.1317	58.4
3.0147	40.4		3.1901	254.9
3.0287	4.9		3.4452	231.6
3.0691	4.8		3.6768	218.4
3.074	5.3		3.8952	26.3
3.0788	52.5		3.9212	7.4
3.0841	9		3.9284	13.8
3.1366	47.1		3.9423	255.7
3.1456	9.8		4.1985	756.1
3.1927	162.2		4.9546	1191.8
3.2025	84.4		6.1464	181.7
3.3647	11.1		6.3281	22.8
3.4491	221.5		6.3507	5.7
3.4602	168.3		6.3563	62.8
3.6817	51.2		6.4194	97.1
3.85	18.4		6.5164	660.9
3.9012	5.8		7.1774	42.4
3.9196	8.8		7.2195	332.5
3.9254	10.7		7.5522	5.8
3.9342	259.5		7.558	10.9
3.9449	187.8		7.5687	8.4
4.2044	565		7.5769	242.4
4.3922	1194.3		7.8198	273.3
4.9572	14.3		8.0931	75.6
6.1515	177.7		8.1686	135.8
6.1658	6.3		8.3044	469.1
6.3435	4.8		8.7735	271
6.3498	62.1		9.0445	7.6
6.3546	11.5		9.052	301.2
6.4167	79.1		9.3534	1167
6.4282	8.1		10.5204	9.7
6.5073	9.7		10.5299	16.1
6.5154	656.4		10.5458	747.5
6.5251	10.5		11.2937	442.4
7.1815	363.6		11.736	190.3
7.192	5		11.9263	4.5
7.5556	5.9		11.9308	16.8
7.5606	8.9		11.9474	504.6
7.5665	243.7		12.4523	11.8
7.5754	271.3		12.4641	236.9
7.8191	57.6		12.7009	268.2
8.0904	23.2		12.9692	285.3
8.148	135.8		13.2545	189.5
8.1712	469.7		13.4439	6.1
8.307	48.4		13.45	52.9
8.7767	223.2		13.5028	199.1
8.8251	307.9		13.7021	253.9
9.0483	454.7		13.9559	233.4
9.3562	209		14.1894	6.4
9.8109	505		14.1956	5.2
10.0199	6.9		14.2007	644.6
10.5249	7.4		14.8456	291.9
10.5318	10.1		15.1375	526.1
10.5392	208.3		15.6636	5
10.5493	540.4		15.6684	5.1
10.7576	435.9		15.6734	5.9
11.298	7.2		15.6791	6.7
11.7339	187.7		15.6853	1742.2
11.7411	4.9		17.4284	4.6
11.9288	6.6		17.4328	11.6
11.9337	517.5		17.4442	9.9
11.9403	4.8		17.4541	879.4
12.4578	230.5		18.3338	7.5
12.4626	11.1		18.3412	63.8
12.6931	264.1		18.4051	424.4
12.7042	6.2		18.8297	262.4
12.9683	283.6		19.092	474
12.9745	9.4		19.5659	950.1
13.2581	174.1		20.516	269.7
13.2675	5.4		20.7857	438
13.4416	7.2		21.2236	5.4
13.447	47.1		21.229	173.1
13.4542	204.3		21.4022	382.5
13.5013	12.9		21.7848	4.9
13.7056	236.1		21.7896	434.9
13.7185	49.1		22.2245	247.1
13.9546	188.8		22.4715	22.2
14.0037	5.8		22.4935	239.8
14.1925	5.7		22.7336	10.4
14.1983	9.8		22.7439	15.3
14.204	635.7		22.7591	222.1
14.2138	284.8		22.9814	208.5
14.8495	20.4		23.1899	1025.6
15.1343	511.9		24.2156	165.5
15.1547	5.2		24.3809	6.1
15.6666	4.9		24.3869	8.5
15.6718	6		24.3953	14
15.6767	5.1		24.409	752.6
15.6827	7.5		25.1622	7.1
15.6878	1735.3		25.1692	203.8
15.6953	4.9		25.3731	478.3
17.4306	6.1		25.8515	5.2
17.4355	10.7		25.8566	990.5
17.4416	5.5		26.847	7.3
17.4523	8.7		26.8542	8.1
17.4578	171.6		26.8622	225.3
17.4665	7.5		27.0879	41.6
17.6381	686.3		27.1293	4.3
17.6456	8.8		27.1335	943.6
18.3319	6.5		28.0774	43.6
18.3407	13.1		28.121	252.8
18.3472	48.6		28.3737	49.4
18.3603	687.2		28.423	667.3
18.4089	473.5		29.0903	5.4
19.0961	12.9		29.0957	5.2
19.5696	175.3		29.1007	7.6
19.5825	757.2		29.1082	211.2
19.7578	73.3		29.3199	17.7
20.515	201.3		29.3375	6.5
20.5883	433.2		29.3438	247.3
20.7896	5		29.5914	966.3
21.2228	175		30.5576	720.3
21.2278	384.6		31.278	5.7
21.4028	5.6		31.2835	231.9
21.7874	270		31.5156	11.7
21.793	160.3		31.5271	469.2
22.063	236.3		31.9964	56.3
22.2233	15.3		32.0527	6.3
22.4596	8.5		32.0589	6.7
22.4749	13.9		32.0654	182.7
22.4834	7.3		32.2484	7.4
22.4973	228		32.2557	496.8
22.5046	10.4		32.7526	28.4
22.7326	6		32.781	23.5
22.743	9.6		32.8042	949.8
22.749	212.6		33.7543	742.5
22.7586	8.9		34.4968	5.2
22.9712	8.9		34.5019	31.3
22.9801	199.3		34.5332	236.3
22.989	9.3		34.7696	12.2
23.1883	423.4		34.7817	186.9
23.1976	306		34.9687	5.2
23.621	8.5		34.9737	453.6
23.927	282.8		35.4275	94.7
23.9355	162.1		35.5223	396
24.2183	5		35.9183	11.4
24.3804	6.6		35.9296	12
24.3854	6.3		35.9415	4.8
24.392	6.5		35.946	775.5
24.3983	7.4		36.7219	10.4
24.4048	6.5		36.7323	188
24.4122	14.4		36.9203	6.7
24.4187	228.8		36.9268	717.6
24.4331	497.6		37.6447	20
24.6619	6.4		37.6645	211.3
25.1595	7.4		37.876	564.8
25.1659	197.9		38.4408	222.8
25.1733	60.1		38.6635	7.4
25.3712	423.2		38.6707	457.9
25.4313	5.4		39.1289	242.8
25.8545	275.1		39.3717
25.8599	709.3		0.8065	513
26.135	8.8		1.3194	6.5
26.8443	7.1		1.3258	166.8
26.8531	5.4		1.4927	71.1
26.8602	219.9		1.5638	485.4
26.8656	12.4		2.0492	225.1
27.0855	33.8		2.2743	230.5
27.0979	5.1		2.5048	513.4
27.1317	7.4		3.0183	48.6
27.1368	47.1		3.0668	4.2
27.1442	883.9		3.071	5.5
27.1913	6.1		3.0762	5.5
28.0752	45.3		3.0817	50.3
28.0813	173.2		3.1323	62
28.1266	73.1		3.1943	252.2
28.2998	8.3		3.4466	238.1
28.3729	17.3		3.6846	211.3
28.3812	652.9		3.8959	25.8
28.3985	42.4		3.9216	19.7
29.0514	4.8		3.9411	1013.2
29.0938	5.5		4.9547	1192.2
29.0986	6		6.1469	200.3
29.1041	213.3		6.3472	4.5
29.1101	8.2		6.3516	5
29.3234	9.1		6.3564	159.6
29.3316	5.6		6.5163	661.8
29.3407	243.7		7.1781	42.1
29.3463	967.2		7.22	332.1
29.59	9.7		7.5523	5.7
30.5572	710.2		7.5579	11.3
30.5669	5.5		7.5691	8.1
31.2771	5.8		7.5771	242.4
31.2826	9.9		7.8199	273.7
31.2884	216.2		8.0935	75.5
31.2983	9		8.169	139.4
31.5145	7.1		8.3084	465.6
31.5235	294.2		8.774	271
31.5306	168.6		9.0451	7.2
31.8248	8.8		9.052	300.9
31.9934	49.6		9.3531	1174.6
32.0022	5.7		10.5276	6.6
32.0518	5.3		10.5341	12.7
32.0575	180.1		10.5468	1189.5
32.0628	5		11.7364	189.6
32.2429	6.6		11.9261	4.5
32.2479	5.1		11.9306	17.2
32.2545	40.8		11.9476	504.4
32.2596	137.9		12.4523	249
32.3004	310.6		12.7011	267.8
32.4383	17.1		12.969	285.6
32.7489	18		13.2547	189.6
32.766	8.8		13.4442	54.1
32.784	14.7		13.4983	209.1
32.7928	7.5		13.7075	248.8
32.8075	938.2		13.9563	233.3
32.815	736.2		14.1896	6.2
33.7532	10		14.1955	5.5
34.4894	7.4		14.2011	644.7
34.4994	18.6		14.8459	292.9
34.5068	243		15.1387	525.4
34.5254	11.7		15.6642	4.4
34.7684	4.5		15.6685	5.1
34.7801	174.9		15.6736	6.1
34.7846	12.5		15.6795	5.9
34.9595	5		15.6848	1742.7
34.972	295.4		17.4283	4.3
34.977	152.9		17.4327	5.7
35.2724	95.8		17.4382	15.3
35.4253	400		17.4533	880.2
35.5211	6.2		18.3338	7.4
35.9211	10.9		18.3411	64
35.9273	5.7		18.4052	423.8
35.9382	4.9		18.8291	262.8
35.9439	6.6		19.0919	474
35.9488	14.6		19.5659	189.4
35.9554	476.9		19.7553	760.7
35.97	273.3		20.5159	270
36.4469	10.8		20.786	437.8
36.7202	188.7		21.2237	5.5
36.731	5.2		21.229	555.5
36.9197	7		21.7848	10
36.9249	270.2		21.7947	430.1
36.9319	445.7		22.2248	246.9
37.2021	6.9		22.4718	22.4
37.6478	10.6		22.4938	239.4
37.6547	209.7		22.7336	10.4
37.6653	240		22.7438	15.4
37.875	43.4		22.7591	222
38.115	488.2		22.9813	208.6
38.1584	20.3		23.1899	1029.8
38.6466	8.2		24.2198	161.3
38.6669	450.5		24.381	6
38.6751	6.2		24.3869	8.3
39.1256	10.1		24.3951	14
39.1318	233		24.4088	752.9
39.1419	5		25.1622	7.1
39.3749	219.7		25.1693	204
39.3799	4.9		25.3734	478.2
39.5996	5.1		25.8516	4.9
39.6045	5.1		25.8564	990.3
39.6096	7.4		26.8467	7.4
39.6147	32		26.8539	8.2
39.6221	218.1		26.8621	225.4
39.6541	170.3		27.0877	41.5
39.8722			27.1292	4.3
			27.1334	943.8
			28.0773	296.6
			28.374	49.4
			28.4233	671.3
			29.0945	5.7
			29.1002	7.6
			29.1077	211.7
			29.3197	17.9
			29.3374	6.6
			29.3439	247.6
			29.5918	962.8
			30.5545	723.4
			31.2779	5.7
			31.2835	231.9
			31.5155	11.6
			31.527	7.3
			31.5341	461.7
			31.9962	56.6
			32.0527	6.2
			32.0588	8.1
			32.0671	181.3
			32.2484	7.4
			32.2557	6.9
			32.2624	489.1
			32.7518	29.3
			32.781	23.6
			32.8044	949.6
			33.7543	742.9
			34.4972	35.3
			34.5322	237.5
			34.7699	11.9
			34.7818	186.9
			34.9688	5.2
			34.9738	448
			35.422	100.2
			35.5222	395.7
			35.9179	12.3
			35.93	11.5
			35.9415	4.8
			35.946	775.5
			36.722	10.4
			36.7323	188
			36.9203	6.4
			36.9266	717.6
			37.6444	21.2
			37.6653	210.5
			37.876	269.4
			38.1455	295.1
			38.4406	222.9
			38.6634	7.2
			38.6704	458.1
			39.1287	242.3
			39.3711
			0.8064	513.1
			1.3194	6.7
			1.326	232
			1.5581	491.1
			2.0493	224.9
			2.2741	230.4
			2.5046	512.3
			3.0169	49.8
			3.0666	4.5
			3.071	5.2
			3.0761	55.7
			3.132	61.9
			3.1939	252.1
			3.446	231.4
			3.6775	218
			3.8955	26.5
			3.9218	19.5
			3.9411	257.6
			4.1991	1947.7
			6.1469	200.5
			6.3474	4.6
			6.3517	5.3
			6.357	159.1
			6.5162	661.5
			7.1778	42.3
			7.2199	331.8
			7.552	6.1
			7.5581	11.3
			7.569	8.1
			7.577	242.5
			7.8199	348.8
			8.1687	140
			8.3086	464.7
			8.7734	271.7
			9.0453	7.3
			9.0523	301
			9.3534	1166.8
			10.5203	12.5
			10.5325	14.1
			10.5465	1189.9
			11.7367	192.6
			11.9291	6
			11.935	766.1
			12.7014	267.8
			12.9691	285.7
			13.2549	189.6
			13.4445	54
			13.4984	208.9
			13.7074	249
			13.9563	233.3
			14.1897	6
			14.1955	5
			14.2005	1463.7
			15.6643	4.2
			15.6685	5.2
			15.6734	5.8
			15.6791	5.7
			15.6837	1742.9
			17.4282	4.5
			17.4326	20.8
			17.453	873.4
			18.3269	11.5
			18.3384	5.2
			18.3434	61.9
			18.4054	686.3
			19.0918	480.4
			19.5722	944
			20.5161	269.8
			20.786	437.8
			21.2237	5.4
			21.2289	555.7
			21.7849	4.9
			21.7898	435.1
			22.2248	247
			22.4718	6.5
			22.4782	17.7
			22.4959	234.6
			22.7307	13.2
			22.7436	15.4
			22.759	222.2
			22.9814	208.6
			23.19	1024.9
			24.2151	166.2
			24.381	5.9
			24.3869	8.4
			24.3952	6.8
			24.4017	11.3
			24.4129	748.7
			25.1622	7.2
			25.1694	198.2
			25.3677	483.8
			25.8514	4.8
			25.8562	990.6
			26.8468	7.4
			26.854	8.2
			26.8621	225.3
			27.0877	41.7
			27.1294	4.3
			27.1335	7
			27.1404	936.6
			28.0774	43.2
			28.1207	253.5
			28.374	49.4
			28.4234	621.8
			29.0453	49.9
			29.0951	5.6
			29.1006	7.2
			29.1077	211.4
			29.3194	18.3
			29.3376	6.2
			29.3436	242.9
			29.5869	967.6
			30.5544	723.7
			31.278	5.6
			31.2835	231.7
			31.5153	11.9
			31.5271	6.9
			31.5338	461.8
			31.9959	56.8
			32.0527	6.2
			32.0587	6.6
			32.0653	182.8
			32.2484	7.5
			32.2557	7.3
			32.2629	488.6
			32.7517	29
			32.7807	23.9
			32.8043	897
			33.7017	53.2
			33.7549	741.9
			34.4967	5.3
			34.502	31.1
			34.533	232.1
			34.7654	16.3
			34.7814	187.1
			34.9687	5.3
			34.9739	194.7
			35.1687	252.5
			35.4212	101.1
			35.5222	395.5
			35.9178	22.9
			35.9405	5.4
			35.9457	775.7
			36.7217	10.6
			36.7323	187.8
			36.9202	6.6
			36.9267	377.3
			37.3041	304
			37.6081	36.8
			37.6449	20.8
			37.6655	210
			37.8756	230.2
			38.1059	333.5
			38.4394	223.8
			38.6631	7.9
			38.6709	389.9
			39.061	71.9
			39.1328	238.1
			39.371
			0.8063	512.9
			1.3192	7.1
			1.3262	158.8
			1.4851	73.9
			1.5589	489.6
			2.0486	167.8
			2.2164	57.9
			2.2743	228
			2.5022	515.4
			3.0176	49
			3.0666	4.4
			3.0709	5.2
			3.076	55.8
			3.132	59.5
			3.1915	253.7
			3.4452	231.9
			3.6772	169.1
			3.8463	74.7
			3.9208	20.3
			3.941	257.4
			4.1987	755.9
			4.9545	1191
			6.1456	181.9
			6.3275	23.3
			6.3507	5.9
			6.3565	62.4
			6.4192	97
			6.516	660.8
			7.1769	43.1
			7.2199	331.5
			7.5515	6.5
			7.5579	18.1
			7.5758	243.6
			7.8197	267.2
			8.0869	81.4
			8.1682	135.6
			8.3038	469.2
			8.773	270.8
			9.0438	8
			9.0518	300.4
			9.3523	450.8
			9.8032	716.5
			10.5195	12.8
			10.5323	14.3
			10.5464	207.6
			10.7542	537.5
			11.2918	444
			11.7358	189.7
			11.9255	5.2
			11.9306	520.7
			12.4514	249.2
			12.7005	268.3
			12.9689	284.9
			13.2538	174.9
			13.4287	19.5
			13.4481	54.9
			13.5029	197.9
			13.7009	254.7
			13.9558	233
			14.1887	6.8
			14.1954	11.2
			14.2063	638.2
			14.8449	818
			15.6628	5.3
			15.6681	5.4
			15.6734	10.1
			15.6833	1744.1
			17.4277	5.2
			17.4329	20.2
			17.4529	367.3
			17.8205	506.3
			18.3268	11.9
			18.3386	65.7
			18.4042	423.6
			18.828	263
			19.091	78.4
			19.1693	395.3
			19.5646	187.6
			19.7522	99.6
			19.8518	660.2
			20.512	273.1
			20.7852	198
			20.9831	240.2
			21.2233	5.9
			21.2291	171.7
			21.4009	296.9
			21.6978	86.3
			21.7842	11
			21.7951	429.3
			22.2244	224.9
			22.4494	26.6
			22.4759	19.1
			22.4949	233.3
			22.7284	15.2
			22.7433	15.8
			22.759	202.1
			22.9615	227.9
			23.1893	1024.7
			24.2141	166.7
			24.3807	6.4
			24.387	8.5
			24.3954	13.8
			24.409	752.5
			25.1619	204.6
			25.3665	231.6
			25.5982	251.9
			25.85	5.8
			25.8557	273.3
			26.1292	709.7
			26.8389	14.7
			26.8535	8.7
			26.862	224.9
			27.0872	41.9
			27.129	5
			27.1338	932.1
			28.0662	52.7
			28.1188	174.5
			28.2934	80.4
			28.3738	49.3
			28.423	357.7
			28.7808	263.2
			29.044	51
			29.0949	6.1
			29.1009	7.6
			29.1083	210
			29.3186	18.9
			29.3375	6.7
			29.3439	241.3
			29.5856	512.7
			30.0983	455.6
			30.5538	723.8
			31.2776	6
			31.2834	231.3
			31.5149	12.1
			31.5269	249.6
			31.7766	218.5
			31.9951	57.4
			32.0525	6.5
			32.0588	161.9
			32.2209	27.8
			32.2487	7.4
			32.256	173.7
			32.4298	315.1
			32.745	35.3
			32.7802	24.1
			32.8041	206.8
			33.0112	689.4
			33.7006	54.3
			33.7549	664.8
			34.4197	77.7
			34.4973	35.1
			34.5322	231.2
			34.7636	17.8
			34.7813	168.2
			34.9496	23.3
			34.9729	293.2
			35.2661	153.8
			35.4199	98
			35.518	399.5
			35.9175	12.3
			35.9296	11.7
			35.9413	523.9
			36.4654	251.1
			36.7164	15.4
			36.7317	177.9
			36.9097	11.5
			36.9211	268.7
			37.1899	113.1
			37.3031	304.8
			37.6079	37
			37.6449	20.9
			37.6655	209.9
			37.8756	230.1
			38.1058	333.7
			38.4394	223.9
			38.6633	397.3
			39.0607	72.1
			39.1327	237.3
			39.3701

## Sheet: Fig 6E
Figure 6E - Correlation of Ex Vivo, and Shuffled spike trains to In Silico Reference
	Correlation Coeff.
	Shuffled	Ex Vivo
E1	0.00238333	0.47041
E2	-0.0011602	0.311667
E3	-0.000647	0.178976
E4	-0.00103667	0.202113
E5	0.00133423	0.432645

## Sheet: Fig 6H
Figure 6H - Stimulus-Dependent ISI Distributions (<30 ms)
Network Clamp ISIs (ms)							Step ISIs (ms)
H1	H2	H3	H4	H5	H6	H7	H8	H9	H10	H11	H12	H13	H14	H15	H16	H17
4.7	7	18.3	10.2	17	5.4		29.05	29.55	29.05	29.5	23.5	26.35	26	29.3	26.75	26.5
5.6	8.1	4.4	27.5	16.3	9.3		28.65	27.65	25.4	28.65	20.9	28.4	22.75	24.3	19.7	28.75
9.4	4.6	5.7	20.3	7.1	27.5		1.25	26.75	28.25	29.65	26.65	23.4	24.15	28.85	22.95	22.1
12	5.9	17.1	24.5	23.6	20.1		20.9	27		26.35	29.55	26.95	20.3	21.6	25.2	24.15
4.7	26.3	19.3	28	22.9	24.3		25.95	28.95		25.05	16.65	29.95	22.3	26.75	30	28.55
5.1	7.4	4.5	7.6	27.5	7.7		29.7	23.6		28.05	20.65	27.35	27.45	18.3	17.75	19.05
11.8	13.8	5.3	19	5.6	19.1		28.5	26.6		28.15	23.95	29.8	16.7	23.1	20.35	21.45
8.1	22.8	7.8	8.8	8.6	9		29.35	22.5		23.85	28.9	22.65	21.3	25.6	24.6	24.9
17.7	5.7	5.8	10.2	18.9	18.5		17.3	24.15		23.75	14.75	23.15	25.6	18.2	28.4	24.95
6.8	5.8	13.6	18.2	27.3	7		17.8	20.35		25.75	19.55	23.8	26.3	20.7	29.75	27.45
5.3	10.9	25.3	6.8	20.4	26.5		23.3	21.6		27.65	22	23.3	16.55	23.95	29.8	29.75
7.8	8.4	26.8	10.1	21.4	12.4		16.55	19.5		22.15	25.7	25.3	19.4	29.65	29.6	15.9
6.2	7.6	8.6	26.2	5.2	20.6		17.95	22.35		24.25	27.9	26.1	22.75	18.5	28.65	18.1
5.6	9.7	7	11.7	28.5	7.9		17.3	20.55		26.7	27	28	25.35	18.25	17.55	20.9
8.2	16.1	12	20.4	7.8	6.3		18.65	21.2		24.45	19	27.05	28.3	24	19.35	24.45
16.5	4.5	6.2	7.9	19.1	5.4		18.75			21.05	15.95	29.4	29.75	24.95	22.95	24.9
12.4	16.8	18.2	5.8	29.9	10.5		14			24.75	22.2	25.4	15.25	14.9	24.85	27.7
5.4	11.8	10.2	15.5	25.3	25.5		15			27	23.6	27.75	18.4	18.3	27.15	28.65
21.9	6.1	25.9	9	26.6	14.1		14.05			21.15	25.25	21.75	22.5	20.9	27.95	29.85
9.5	6.4	11.5	16.5	8.6	24.6		14.65			24	25.55	21.7	28.65	14.25	26.7	29.95
15.1	5.2	20.5	13.3	19.6	18.9		13.25			19.05	26.05	23.25	27.25	16.6	26.4	15.45
6.4	5	7.5	19.3	7.4	27.6		14.85			22.05	27.1	22.7	29.25	20.5	28.1	17.85
7.8	5.1	5.9	5.4	11.5	19.4		12.5			18	28.95	23.5	29.05	14	29.5	17.95
13.9	5.9	6	27.1	6.9	21.8		12.9				29.35	25.6	29.9	15.65	27.75	23.25
6.5	6.7	3.8	19.5	10.4	20.2		12.1				24.5	24.7	14.45	19.1	29.7	22.7
6.5	4.6	7	15.4	22.5	13.8		12.45				16.1	24	18.7	12.6	28.75	26.6
4.6	11.6	4.6	14.1	11.6	15						18.95	26.2	22.15	17	25.35	28.9
5.5	9.9	20.9	14.9	20.5	19.6						21.3	24.55	22.9	18.25	13.45	28.8
7.4	7.5	13	19.3	27.4	6.5						22.35	25.15	27.5		16	28.85
16.3	5.4	5.6	16.8	23.2	28.2						23.65	26.15	28.7		20.35	27.75
6.2	4.9	5.2	14.6	7.6	12.1						27.1	28	27.5		21.9	28.5
5.6	22.2	22.4	8.8	15.5	10.3						25.6	27.45	27.4		23.3	29.2
11.4	10.4	10	6.5	5.4	6						26.8	28.15	28.6		24.2	29.7
6.4	15.3	6.5	20.2	5.5	20.9						29.75	27.65			25.75	14.15
7.3	6.1	8.2	28.3	10.4	9.3						28.55				25.7	15.05
24.6	8.5	14.7	10.7	5.3	28.4						29.95				25.25	18
18.8	14	18.5	6.8	21	11.4						21.35				25.9	19.55
4.9	7.1	5.5	29	13.1	6.7						14.8				27.15	21.55
8.1	5.2	10.1	7.6	18.3	29.2						17.7				26.05	13.75
20.5	7.3	6.5	24.7	23.7	7.5						20.6				25.6	15.3
0	8.1	6.7	19.1	19.5	25.4						25.1				27.35	17.7
4.6	4.3	4.6	25.2	5.6	19.5						26.5				27.6	17.55
5.4	5.4	5.5	7.4	6	25.5						23.1				26.9	27.75
20	5.2	7.8	17.8	24.4	25.6						26.15				28.45	11.7
5.7	7.6	18.3	10.8	22.3	10						27.85				29.4	13.5
6.1	17.7	7.1	11.6	29.7	29.7						27.05				27.8	14.35
13.3	6.5	29.8	22.1	13.8	13.4						28.15				26.5	19.7
17.7	5.7	5.7	0	23.9	22.1						29.65				28.2	20.9
18.1	11.7	27.8	17.9	20.5	0						22.15				12.4	12.55
5.8	6.3	11.1	9.9	20.9	11.3						14.85				15.3	13.4
6	6.7	6.4	27.2	6.7	27.3						16.4				19.8	16.55
10.5	7.4	28.8	20.3	7.7	20.2						20.8				20.6
7.9	28.4	7.3	24.8	14.1	24.6										21.5
16.7	23.5	24.9	7.3	16.4	29.1										23.4
5.4	5.2	18.6	19	6.1	7.8										23.65
22	12.2	24.9	8.8	12.1	19										23.8
9.3	5.2	6.6	10.3	29.1	8.9										25.75
15.7	11.4	18.5	18.1	12.1	20.3										24.5
6.6	12	10.1	6.9	27.5	18.5										24.8
7.8	4.8	10.2	10.2	5.6	7.1										25
14	10.4	12.7	22.9	15.7	10.7										25.4
6.4	6.7	21.8	11.8	9.6	27										26.3
6.3	20	17.5	20.5	5.7	12.6										24.95
4.7	7.4	29.8	8.1	20.4	20.5										26.4
5.6	0	0	5.8	7.3	7.8										27.1
7.3	6.5	7	5.4	6.3	6										26.9
16.4	4.2	23.6	10.6	27.6	5.5										27.2
6.2	5.5	5.6	9.1	11.4	10.3										29.55
5.5	5.5	5.2	16.4	6.6	9										23.8
11.2	25.8	3.9	13.6	5.9	16.5										27.95
6.3	19.7	27.4	5.8	28.7	16.4										27.3
7.2	4.5	20.6	27.4	7.5	5.6										27.85
24.4	5	21	19.2	24.7	27.9										27.15
22.5	5.7	5.3	15	19	20										25.65
5.1	11.3	25	22.5	22.1	14.8										29.05
9	8.1	7.7	14.2	25.2	25.5										10.8
16.9	7.2	5.9	15.1	6.9	14.1										13.7
0	6.6	13.7	19.5	18.5	15.1										16.8
4.6	12.7	24.9	6.3	5.9	19.9										19.75
5.5	4.5	26.9	11	29.4	28.4										20.8
20	17.2	9.3	28.2	13.4	11.7										22.45
4.3	6.2	19.9	12.2	7.3	10.8										23.1
6.2	5.5	8.2	6.2	21.9	20.4										21.4
17.9	4.4	6.8	20.8	16.7	9.1										22.35
17.7	5.1	10.1	28.3	29.6	6.5										22.75
18	6.1	26	11.8	16.3	11.9										23.55
5.6	5.9	11.6	11.3	0	6.7										22.9
8.2	4.3	20.4	29	23.4	29.4										23.95
6.3	5.7	27.2	7.5	5.3	7.5										24.85
5.7	15.3	7.9	25	8.9	24.9										25.9
8.2	7.4	5.8	19.3	27.4	19.3										24.25
16.6	5.5	5.9	25.3	20.2	22.6										25.7
5.4	10	10.8	7.3	24.6	25.4										25.25
21.9	22.4	7	18.2	6	9.9										25.75
9.6	10.4	5.8	28.7	28.1	29.4										23.95
15.1	15.4	15.8	13.3	7.5	12.8										25.2
13.6	6	13.8	22.2	19	22.1										28.15
6.5	8.3	12.2	17.4	24.9	18.4										27.1
9	14	19.4	0	8.7	0										25.25
15	7.1	20.2	16.8	19.3	9.8										25.9
6.7	4.9	24.4	10.1	7	27.3										24.9
6.3	7.4	19.8	27.3	12.1	20.1										26.95
4.7	8.2	5.6	20.5	6.6	24.7										26.45
5.5	4.3	6.7	24.7	10.4	29.5										10.95
7.7	5.7	12.2	7.5	22.5	8										13.7
16.3	7.6	23.9	19	11.6	19										16.25
6.6	17.9	23.4	24.9	20.4	8.9										19.3
5.8	6.6	28.7	9.1	7.6	20.5										21.9
11.4	5.7	15.8	9.9	17	18										21.45
6.4	11.6	22.3	17.8	5.5	6.9										23.35
7.3	7.3	20.5	6.9	5.7	26.8										23.05
24.5	6.2	21.6	10.1	9.8	20.8										22.9
4.8	8.1	14.4	26.3	5.9	7.8										24.05
22.8	7.4	16.5	11.7	21.1	6										24.25
5.1	6.9	24.2	20.4	13.3	5.4										24.5
21	29.3	7	8.2	18.6	10.5										25.85
0	23.6	11.1	5.4	23.8	27										24.5
4.5	11.9	28.4	9.1	19.7	16.7										23.8
5.6	5.2	13.2	16.6	5.5	5.5										27.35
6.3	12.3	11	14.3	6.3	27.4										25.3
20.1	11.5	15.5	5.9	24.3	20										25.35
5.6	4.8	12	27.5	22.5	14.7										25.35
9.8	10.4	23.7	19.6	29	20.7										24.8
14.4	6.4	17.9	15	14.9	13.9										25.8
17.8	21.2	10.5	14.2	24.2	15										25.7
18.7	7.2	5.6	15.5	20.5	19.9										25.5
5.8	0	9.4	16.1	20.9	12.4										25.45
7.9	6.7	13	6.1	6.8	20.9										25.2
6.4	4.5	6.9	11.2	7.8	6.7										25.5
5.5	5.2	28.1	8.3	14.3	29.2										26.15
8.3	26.5	12.3	7	16.5	7.4										25.9
16.6	19.5	6.5	6	6.2	24.9										10.4
5.5	4.6	29.1	20.5	11.5	19.5										12.65
21.1	5.3	7.2	6.6	29	25.6										15.8
9.1	6.1	25.3	27.9	12.2	25.5										18.7
6.3	11.3	24.3	10.5	28	10										20.9
7.8	8.1	19.6	6.7	10.5	29.6										23.35
14.1	7.3	21.7	29	17.6	12.7										23.1
14.6	12.5	6.2	7.5	6.1	21.9										21.7
11.8	14.1	25.3	24.9	9.3	0										27.5
4.7	6	8	19.2	12.3	10.8										27.4
5.5	6	18.8	24.7	8.9	15.5										26.2
7.5	5	21.5	25.1	6.4	24.9										28.1
16.2	4.2	9.6	10.2	28.2	7.9										29.4
6.3	5.2	28.7	21.9	11.6	18.9										26.7
5.5	5.8	13.7	9.9	6.9	9										27.25
11.4	5.7	7.2	27.2	6	18.4										27.1
6.3	4.5	16.2	20.1	26.4	6.9										28.2
7.3	20.8	17.9	24.7	10.1	20.6										10.2
24.5	11.5	29.8	29.3	25	7.8										12.7
4.8	5.2	0	7.6	24.2	5.8										15.5
22.3	5.4	17.6	18.8	19.4	15.5										18.95
5	4.9	16.3	25.7	22	9.1										19.45
9.7	6.5	23.8	10.6	5.3	16.7										22.15
16.9	17.7	10.7	17.9	25.7	16.6
	13.2	3.5	6.8	7.1	27.8
	15.4	19.6	10	18.6	21.8
	5.9	27.6	26.1	9.9	14.8
	8.4	20.5	11.9	22.7	13.9
	6.8	26.7	20.4	7.9	14.9
	11.3	26.9	7.9	13.4	19.6
	7.2	21.7	5.7	22.9	12.2
	4.8	4.7	16	17.1	11.9
	7.4	25	25.6	29.7	22.2
	8.2	8.4	13.4	23.6	11.9
	4.3	5.9	19.2	0	7
	7	13.8	27.4	17.2	29.3
	5.6	24.7	19.8	17.1	25.6
	7.2	26.1	13.7	23.1	19.6
	18.3	8.7	21.9	27.8	25.4
	6.2	10.3	14.3	5.6	25.5
	5.6	17.6	15.1	9.2	10
	11.9	6.7	19.3	19.2	12.7
	6.9	10.3	6.1	27.6	22.2
	6.2	22.7	11.3	20.2
	6.6	11.7	11.8	24.7
	7.5	20.6	11.1	6.5
	7.3	7.7	12.8	28.6
	29	5.3	20.5	7.8
	23.9	5.4	6.5	19.1
	5.3	10.7	11.6	25.1
	16.3	5.6	10	26.8
	5.3	6	29	8.6
	22.9	15.5	7.5	20
	5.4	13.1	25.4	18.1
	10.6	24.5	19.1	6.9
	6.6	19.4	24.9	10.5
	20.8	5.5	7.3	22.3
	7.9	6.2	17.9	11.7
	0	24.6	10.7	17.2
	7.1	22.6	12.8	29.8
	4.4	29.1	22	24
	5.2	14.9	29.8	7.8
	20.3	25.2		27.8
	23.3	20.6		5.6
	5.9	12.1		5.8
	6.5	21.8		10.1
	18.1	14.4		6.1
	8	15.2		21.3
	12.8	11.6		13.3
	14.3	13.5		19.4
	5.2	26.6		24.4
	19.5	6.3		19.5
	6.8	11.6		5.6
	11.2	28.3		6.3
	5.3	13.3		24.1
	5.4	10		22.8
	10.1	5.2		28.9
	5.2	7.7		15.3
	20.2	16.7		24.5
	11.9	5.2		20.7
	5.9	11.4		21
	11	6.6		7.1
	26.6	29.3		7.7
	19.1	7.3		13.9
	15.2	24.9		16.1
	15.8	17.2		26.2
	6.4	23.3		6.1
	8.5	9.8		12.1
	13.8	9.2		10.4
	5.8	6.9		29.1
	14.7	20.7		12.3
	8.7	0		5.9
	5	8.3		15.8
	6.1	5.4		11.2
	7.6	26.4		23.6
	18.9	19.1		9.4
	6.7	23.7		5.8
	6	5.8		9
	12.1	6.4		12.6
	6.5	18.7		9.1
	27.8	7		6.5
	7.4	12.3		28.1
	24.1	5.7		11.9
	17.8	12.8		27.2
	23.3	5.8		6.9
	12.3	6.1		6.1
	11.7	7		26.1
	15.4	6		10.6
	11.5	16.3		25
	20.9	12.3		24.3
		5.3		19.5
		5.4		21.7
		21.5		5.3
		10.2		25.2
		6.2		7
		8.2		18.9
		14.4		10
		11.5		21.4
		4.9		9.2
		5.5		29.8
		7.6		13.5
		18		7.2
		7		16.2
		5.5		17.6
		11.4		29.7
		6.1		17.9
		28.1		23.4
		7.2		0
		24.5		17.6
		17.6		16
		4.8		7.8
		23.1		23.7
		10.1		24.2
		8.6		27.6
		21.4		5.5
				5.9
				2.9
				19.7
				27.8
				20.3
				27.8
				26.3
				21.7
				4.8
				28.7
				8
				19.2
				24.8
				27.5
				8.7
				19.8
				18.2
				7.1
				10.5
				22.4
				11.9
				17.5
				29.4
				24.3
				7.9
				17.4
				5.7
				5.5
				10.5
				6.4
				6
				15.6
				13.3
				18.9
				19.9
				24.3
				19.5
				5.5
				6.3
				11.9
				24.1
				22.7
				28.9
				15.1
				24.7
				20.8
				21.4
				6.9
				7.9
				14.3
				16.2
				26.5
				6.1
				11.7
				10.8
				29.2
				12.3
				5.4
				15.6
				11.7
				23.6
				10.5
				5.7
				9.1
				12.7
				9
				6.2
				28.2
				11.7
				27.8
				7
				6.1
				26.4
				10.4
				24.8
				23.7
				19.8
				21.6
				5.4
				25.3
				7.2
				18.8
				9.7
				20.6
				10.1
				29.4
				13.6
				8.3
				7.2
				16.1
				17.4
				29.7
				20.2

## Sheet: Fig 6K
Figure 6K - Shortest ISI Triggered by Variable Current Lengths
	ISI (ms)
Current Length (ms)	K1	K2	K3	K4	K5	K6	K7	K8	K9	Mean	SD
400	4.9	6.2	5.16667	5.26667	11.65	5.4	19.5	5.46667	3.63333	7.46481	5.04466
300	5.2	10.4667	5.6	5.56667	4.95	4	13.6667	6.3	3.7	6.60556	3.29581
200	12.0333	6.3	5.53333	20.4	14.1	5.9	14.5333	6.3	3.83333	9.88148	5.60912
100	18.3333	25	14.5333	19.3333	2.93333	19.9333	2.83333	27.3	8.63333	15.4259	8.93216

## Sheet: Fig 6N
Figure 6N - Cell-Dependent ISI Distributions
ISI (ms)
Parvo (n=7)							Magno (n=6)
N1	N2	N3	N4	N5	N6	N7	N8	N9	N10	N11	N12	N13
313.4	578.8	512.6	214.3	150.1	214.9	238.7	19422.7	869.7	870.9	1743.7	871.7	956.5
6.5	205	163.5	314.1	17	314.4	494	1913.9	11738.4	11736.9	875.9	2413.1	789
156.6	298.7	75.2001	163	16.3	163	221.9	40001.5	8728.6	8728.9	2406	1206.7	10.0999
75.5	15	129.8	76.2	181.5	82.2	231.1	40000.1	8395.9	10560.7	1225.5	4373	56.1
129.3	162.4	361	127.9	213.2	122.3	560.4	40000.3	10271.5	29439.6	4353.2	2263.9	64.3
347.3	74.8001	166.5	104.1	56	348.5	4.7		12604.3	8395.6	2265.5	1473.6	726.4
17.9998	130.2	58.7999	261.5	45.5	179.1	5.6		8728.5	11137.2	1472.1	1764.2	22.4002
161.9	346.9	227.3	162	7.1	59.5	55.8		18667.5	11737.9	16.8001	905	2404.9
59.4	18.7001	373.7	59.6	155.3	231.2	62.4		11829.1	8728.8	1747.8		166.9
568.1	160.9	190.7	227.5	52.7	336.6	726.8		9503.41	2449.9	910.6		1039.7
33	59.6999	10.5998	340.6	23.6	33.3	9.4		18666.8	37550.2			20.2998
191.2	187.6	55.3001	33.2	128	190.9	12		866.797	2449.3			594.9
4.49995	43.5001	58.2	144.1	103.5	5.4	2404.6		11737.5	270.813			605.401
5.6001	370.2	254.4	47.1	226.9	9.3	4.7		8728.8	2214.39			273.6
55.4	142.5	232.7	10.2	31.9	51.3	5.1			3460.91			1481
58.1999	48.5	217.9	55.4	143.1	62.3	159.9						1396.9
167.4	9.60015	27.2	58.8	22.9	249.8	666.6						776.399
86.7999	55.6999	20.5	167.5	59	190.6	36.9						742.5
191	57.8	254.7	86	123	209.9	336.7						745.2
209	167.9	2153.3	190.4	63.2	50	11.8						1474.6
50.9001	86.9001	165.7	41.7	41.5	27.5	8.1						1763.7
27.0001	191.7	660.5	168	105.7	20.1	243.1						23.5998
19.8998	208.5	43.4998	50.3	27.5	254.3	348.9						885.801
255.1	51.6999	331	27.5	157.6	188.4	604.7
188.5	25.8001	25.7996	20.3	49.8	455.3	276.6
217.8	20	235.1	254.5	33	110.8	1477.8
237.1	254.8	356.8	188.3	119.5	231.3	17.7
110.8	190.4	134.4	455	71.5	561.6	1383.7
1115.9	215.9	470	111.1	5.6	323.2	6.8
77.5	237.8	270.2	967.7	8.6	77.3	523.6
206.1	112.2	308.6	148.3	51.5	148.8	242.1
5.6001	1114.2	1167.2	77.3	57.5	33.5	267.5
56.9	78.3999	13.5997	148.9	157.9	24.3	290.2
75.7997	148.6	758	33	96.8	138.5	188.3
27.6001	52.5001	445.3	24.5	190.5	240.6	55.3
213.4	5.79961	188.4	61.9	41.7	445.9	691.7
446.5	136.7	527.5	76.7	150.1	44.7	5.3
43.8003	27.4998	249.2	28	18.9	329.1	1464.8
330.2	212.5	258.7	212.4	49.4	7.7	7.8
6.7002	447.1	293.8	446.5	27.3	19.1	6.2
5.3	43.2998	175.099	44.2	20.4	175.5	5.6
14.1001	331.6	19.4004	329.3	180	331	1744
507.4	7.29961	55	7.6	74.2	85.4	8.2
54.9004	18.1001	197.8	19	188.7	134.2	16.5
32.2998	234.7	255.201	176	206.3	429.3	884.4
131.5	274.1	232.2	67.7	248.5	41.3	12.4
470.4	82.8003	658.3	263.4	111.2	44.5	61
44.5001	134.1	820.399	84.8	230.9	225.6	680.8
226.1	470.4	7.00019	134.6	329	9	1425.2
7.99989	45.6004	10.4998	469.6	231.8	298.3	274.8
299.6	224.9	1743.9	44.6	175.8	447.9	432
136.801	8.70011	25.0994	226.3	145.8	52.5	5.4
313.899	300.2	884	8.8	80	156.8	555.2
49.6006	135.7	66.7013	298.7	148	268.7	441.1
156.899	520.9	686.699	448.1	33.9	251.5	246.9
510.2	500.7	1425.7	52.1	21.4	18.5	21.9
10.2998	19.1006	268.101	157	5.2	203.9	240.3
17.4004	17.7998	439.099	510.8	59.3	418.6	9.5
204.6	204.8	560.401	10.2	76.2	120.9	15.1
418	417.7	440.299	18.2	28.5	415	223.4
121.4	122.1	247.701	203.3	74.5	218.3	1398.6
415.5	206.4	24.0995	418.6	96.9	7	6.4
30.8994	208.599	232.799	120.9	41.4	519.8	7.8
187	31.3	14.9997	415.7	169.6	229.2	13.9
5.99978	187	237.5	217.6	164.8	26.5	753.3
520.801	6.30059	208.3	6.8	112.1	252.5	692.4
9.5998	520.399	1022.9	519.9	44	12.4	994.4
219.4	230.4	168.299	10.1	76.5	282.7	6.5
279.399	24.2001	14.1013	219	160	174.1	6.5
10.8001	254.8	16.2991	26.2	93.2	20.6	266.2
284.2	11.5001	750.801	253	7.8	49.6	4.6
173.8	223.9	435.799	11.7	19.1	202.5	944.6
20.0001	58.2002	252.102	283.4	175.3	189.5	296.4
55.1005	129.5	998	174.2	58.8	67.2	49.2
197.9	45.3	13.6992	20.4	31.6	230.9	671.4
255.3	19.4998	227.5	55.6	240.8	7.9	5.5
232.3	49.4003	39.5996	196.9	55.4	648.3	7.4
6.8992	202.3	948.4	255.4	29.9	283	217.4
5	190.3	216.4	121.5	25.3	218.2	16.3
644.601	65.6008	80.6993	110.7	82.5	317.1	6.2
282.599	232.299	49.0996	7.9	26.6	6.3	1210.4
535.701	7.80011	671.201	648.5	427.6	5.4	720.3
4.7998	459.8	11.9006	282.3	42.3	10.5	5.6
5.4002	173.301	218.099	218.4	44.2	209.3	231.9
6.2998	299	16.9005	317.7	188.4	1484.9	11.4
5.2998	217.3	756.799	5.8	38.1	49.5	525.3
209.4	94	456	15.5	8.6	25.5	6.4
1533.3	193.2	723.6	209.7	169.1	122	189.8
4.59961	31.5996	237.5	1485.1	129.4	244.9	7.3
5.50024	9.29961	12.3006	49	137	344	523.8
15.9999	10.9005	469.6	9	310.9	160.3	24.6
872	1476.7	55.2011	16.5	52.5	14.1	1695.4
12.0995	219.6	13.0994	122.1	156.8	65.3	32.5
6.30065	47.5996	182.7	244.9	268.4	211	248.9
61.0002	8.99976	531.201	504.7	232.5	177	191.6
685.801	16.5	25.4999	13.3	19.6	298.3	550.4
78.3983	121.801	895.5	65.8	7.4	78.3	398.8
395.301	243.699	92.8985	388.1	11.5	94.8	18.8
187.4	506.6	706	298.1	203.2	309.2	4.9
98.7989	13	33.1016	78.5	33.3	178.2	778.6
729.901	65.6017	248.5	94.8	237.8	92.4	8.1
204.701	211.199	187.898	301.6	147.4	620	188.2
438.199	177	451.402	185.9	121.2	53.3	724.5
5.40072	298.6	97.3982	100.7	173.5	63.4	20.5
91.4001	78	399.898	612.1	105.2	204.3	211
80.0996	387.5	23.3011	52.3	136.2	198.6	787.6
383.299	195.9	782.699	63.6	31.3	197.7	469.2
5.00011	99.1993	196.5	204.4	66.9	24.6
436.201	613	382.703	420.4	120.2	18.9	239.9
250.4	52.0002	341	19.3	6.9	95.1	492.9
19.5995	267.9	22.0974	5.4	290.9	81.6	222
248.6	196.5	210.403	90.4	228.8	73.3	231.2
216.6	224.6	787.199	81	10.4	223	560.6
21.701	18.6017	469.301	296.9	218.7	85.8	4.6
207.899	96.4999	237.098	85.6	22.5	232.3	5.4
1024	79.799	1949.1	441.3	256.7	200.4	55.8
167.102	75.8005	163.5	223.9	11.6	232.7	62.5
5.79859	220.6	75.3987	27.1	153.6	27.6	726.7
8.80102	87.0001	494.5	19.5	129.8	19.4	20
14.4002	275.801	221.402	233.1	128.8	205	2409.4
245.398	155.299	231.797	15.4	45.5	43.3	5.7
511.5	233.4	559.902	217	20.5	217	160.6
198.801	27.3009	10.4999	229.4	27.4	21.8	702.6
59.5	19.2986	55.3987	419	23.2	207.7	337.4
173.5	233.202	59.1991	374	201.5	165.5	6.1
253	15.3982	704.5	229.9	189.7	253.1	13.3
4.49967	217.102	26.9025	168	66	275.3	243.9
272.199	22.0995	20.3008	14.1	41.8	99.3	351.6
718.801	206.5	2204	14.9	79.7	229.3	606.1
6.99989	224.4	203.898	244.8	44.3	148.6	272.6
8.09972	196.898	165.898	492.7	66.4	20.2	1477.6
267	274.801	660.402	19.3	7.6	13.8	17.7
4.09928	97.4998	43.8987	198	231.6	15	1383.6
985.901	230.301	336.199	60	217.5	245.1	18.1
174.301	167.799	19.7031	173.5	185.4	368.2	512.3
80.1995	7.30091	243.598	252.3	15.5	123.9	245.4
49.701	8.0995	348.5	16.8	65.7	19.6	264.3
671.6	13.4004	609.403	212.2	215.6	197.5	290.2
5.1992	198.5	265.898	184.9	217.6	59.9	188.3
6.9003	539.699	308.102	574.6	38.1	172.9	55.5
211	19.0997	1175.9	14.6	249	252.2	691
7.9005	198.4	19	8.8	31.6	6.5	5.8
12.4998	232	744.301	199	5.4	223.1	1466.8
5.9003	252.4	445.699	67.4	5.5	49	6
240.1	6.40052	192.398	126.7	10.4	135.8	10.5
513.199	222.9	530.203	146	209.4	330.9	1745.2
460.201	50	243.5	662.1	108.3	226.9	7.9
720.399	710	266.5	55	72	28.2	16.7
5.40017	14.5997	285.199	173.8	495.1	12.1	884.5
231.701	8.7987	189.199	81.3	336.1	199	66.9
11.5997	224.801	55	49.7	473.6	67.9	687.1
469.1	41.6995	202.898	620.3	48.3	10.3	1425.1
57.6991	10.3007	254.703	51.2	5.3	116.2	274.8
5.49978	116.6	232.199	6.5	21	145.8	432.1
160.901	145.801	11.3987	216	118.9	462	5.4
28.0995	675.699	1462.7	20.2	58.4	199.9	555.4
7.40026	42	10.2031	246.1	60	55.2	440.8
487	173.6	11.1992	513.7	127.4	173.7	246.9
37.9002	81.0001	1743.9	460.3	346.1	81.9	22
24.3985	48.9002	25.6991	556.8	160.6	49.1	240.7
203.801	357.1	884.102	133.1	13.1	158.2	9.3
691.101	263.5	66.6993	31.1	66	175.7	15.7
800	51.4002	2112.5	209.8	210.5	286.5	222.4
33.1991	10.801	268.601	28.3	177.1	51.6	208.4
230.301	212.4	438	10.7	36.3	6	1190.3
17.8985	19.3985	474.301	136.1	222.8	215.7	6.6
191.301	247.701	86.3982	154.2	40	20.9	7.8
293.102	512.9	441.102	234.6	78	9.3	14
154.598	255.5	247	6.8	94.6	236.6	753
97.301	200	23.9998	160.3	150.4	513.6	692.5
399.301	724	238	29	141.4	254.5	994.6
5.6992	6.69911	10.4997	7.6	196.1	129.5	6.4
18.5	230.801	236.898	172.3	91.3	77.1	6.3
4.80078	12.0995	1399.3	313.3	197.7	128.1	266.3
785.899	248.199	14.0002	38.4	423.5	427.9	4.7
189.101	219.701	17	24.7	35.3	132.9	944.4
6.19909	57.5996	750.199	204.1	18.3	31.5	296.6
375.699	6.69909	689	690.1	62.9	208.9	49.1
304.301	161.5	999.398	56	204.1	28.4	671.4
36.6992	27.8007	11.6016	233.8	113.9	11.4	5.6
6.40241	7.90061	266.203	324.8	84.7	135.6	7.3
15.797	172.599	949.297	106.2	198	154.9	217.3
211.5	315	296.297	80	23.7	177.8	16.4
561.602	36.0996	49.5001	32.8	19.5	57	6.2
196.5	24.3008	671.101	229.7	5.6	6.7	1210.7
498.199	206.098	11.8985	19.1	89.7	160.1	720.1
236.403	689.703	218.305	166.3	67.8	29.2	5.5
1635.2	54.3984	16.7967	25.2	86.8	7.5	232.2
314.098	40.5001	1216.2	292.8	223.1	171.6	11.2
6.5	701.199	720.398	154.2	86.3	314	525.2
156.703	35.9023	238	97	6	38.4	6.3
75.2968	231.5	15.5001	398.9	226	25.4	189.9
128.902	17.4999	520.602	7.4	133	202.9	7.2
347.699	168	196	17.8	66.6	460.7	523.9
17.9998	23.3984	8.39844	471.4	233.2	229.6	24.4
162	447	523	309	24.4	94.9	1695.6
59.3982	97.8984	25.797	10.8	22.3	195	32.6
185.602	399.602	950.101	177	205.6	232.9	248.7
382.5	23.6015	38.5	11.6	29.7	92.6	191.6
32.8007	524.098	705.5	381.4	13.8	104.7	550.1
142.301	251.902	33.5001	304.6	213.4	81.2	395.5
49.1992	14.8983	248	36.9	23.9	32.8	22.5
4.19922	176.398	191.5	22.1	137.7	229.1	5.1
5.60178	13	545.203	210.1	51.5	19.5	777.5
55.5977	100.301	399.797	229.5	20.5	166.1	9
225.601	586.602	23.3986	332.4	164.5	25.5	188.1
86.8009	36.5	790.5	197.1	58.2	194.4	728.4
190.898	21.3007	188.805	32.7	195	93.5	16.9
41.1991	210.098	382.5	464.9	274.8	158.6	211
168.199	229.801	346	236.7	49.1	97.2	787.2
50.3006	334.699	17.3983		50.1	398.7	469.1
26.9023	223.102	997.398	214.5	229.9	25.6
20.0976	397.098	469.398	313.9	147.9	10	239.2
255.402	68.1018	237.102	163.3	20.9	461	493.6
188.098	241.301	1949	76.5	6.7	290	221.9
455.102	1431.6	163.703	128.3	7.7	29.7	231.4
110.898	204.801	75.2968	103	14.1	175.9	560.4
1115.8	312.5	494.305	244.6	148.9	13.4	4.6
77.4999	163.801	220.898	17.9	49.7	132.9	5.5
205.898	75	231.602	161.2	46.6	131.3	55.8
5.60162	130.602	370.797	59.6	368.5	116.9	62.4
132.801	363.5	190	231.4	123.4	304.7	726.9
27.6993	163.797	10.3986	336.9	16.4	37.1	20
659.898	58.3009	55.2029	33	201.1	22.1	2406.5
44	227.5	58.1016	191.4	60.2	193.6	4.3
330	374.801	255.195	9.9	172.8	244.7	164.9
6.60156	142.199	231.805	55.4	252.2	332.5	702.6
5.3985	47.6992	218.695	62.8	6.1	197.4	332.6
14.1018	9.50022	26.7032	164.2	12.1	33.8	6.2
507.101	55.8008	20.6016	85.6	211	392	17.9
55.0975	58	2202.9	190.9	48.8	72.9	243.8
634.602	168.699	204.898	209.5	136.3	236	351.7
44.3985	86.4024	166	50.1	330.7		602.1
226.301	191.301	660.797	27.2	226.1	214.8	277.5
7.49972	42.3984	43.3047	20.3	29.1	213.4	1476.6
299.898	166.199	330.898	255.7	12.1	101.5	17.7
450.703	51.4024	10.7969	187.3	52.4	162.6	1190.6
206.5	25.9999	14.8047	454.9	146.4	76.3	193.2
510.199	19.8985	591.5	110.8	27.5	127.7	18
9.80091	254.699	604.5	968.2	40.6	103.8	512.3
5.69922	190	270.602	148.1	5.6	226.8	241.9
12.3986	216.902	1484.3	77.1	38.8	36.3	267.6
203.801	237.398	19.3984	181.6	82.3	161	284.9
418.199	1227	1379.2	24.8	145.5	59.5	190.1
121.403	77.3984	524.695	138.7	169.1	186.2	58.5
633.797	181.301	249.5	686.8	292.8	46	691.7
5.80102	24.1993	268.703	44.5	156.9	335.5	5.6
6.10134	139	284.203	329.3	43.6	33.6	1464.5
514.801	27.0001	175	7.3	15.7	120.2	8.2
9.39828	212.703	19.5938	19	39.2	70.7	6.3
219.899	447.297	55.703	175.7	173.7	11.3	5.7
24.8006	43.2031	196.898	67.9	35.9	54.6	1743.7
254.5	330.797	255.203	263.6	46.2	58.2	8.2
10.1992	7.40241	232.695	84.6	49.2	156.9	16.6
284.402	18.3984	11.3047	134.1	157.8	96.9	884.5
7.69944	234.699	1467.1	429.4	176.7	190.7	66.6
165.898	273.102	11.7968	41.4	285.2	41.7	687.4
20.2031	83.6018	1749.1	44.4	42.9	168.4	473.6
50.2971	134.199	25.4998	226	9.6	50.4	951.5
202.902	470.5	884.5	8.8	5.7	27.3	275.4
255.199	46.0976	66.1954	298.5	215.7	20.2	431.6
232	224.602	687	137.7	20.4	253.8	5.4
7.30078	8.60184	1701.5	314.1	7.3	188.8	555.2
5.09744	300.297	431.102	49.3	239.1	218.4	440.8
644.602	450.602	560.102	156.5	32.9	236.3	247.3
282.301	716.699	440.898	510.3	480.5	111.1	21.9
536.301	13.1992	247.305	10.3	99.3	230.9	240.1
4.29681	758.5	25.5936	18.1	155.3	330	9.6
5.30072	444.402	231.5	203.5	129.4	406.8	15.1
6.19928	189.5	15.2031	418.2	73.3	148.6	222.8
5.30076	6.3985	446.297	121.1	132	77	208.7
1743	520.199	1022.6	415.8	428.7	148.5	1190.5
4.40226	249	168	217.6	132.6	33.8	13.6
5.79688	268.301	14.3047	6.9	30.8	24.6	6.5
15.8007	284.602	16.297	520	6.3	61.4	9
872.301	174	750.5	10.2	203.5	76.4	752.2
11.8982	20.3986	436.102	218.5	27.6	29.1	689.5
5.70341	49.9023	253.898	22.9	11.4	73.4	15
61.2966	202.398	998.203	256.4	136	138.3	982.6
686	255.102	11.5001	11.8	154.9	170	6.7
473.602	232.797	266.594	283.4	148.1	276.2	6.3
187.398	7.301	127.5	174.1	80.9	44.2	266
98.9023	648.699	862.805	20.5	6.6	329.7	4.7
729.801	284.602	976.102	55	5.9	7.8	944.5
204.699	533.898	230.297	197.4	160.1	19	296.5
438.699	6.60161	16.6016	189.7	28.7	175.4	49.1
5.10162	14.8008	1217.4	66.4	7.5	68.5	671.5
90.7969	1743.5	719.898	121.1	172.1	262.6	5.5
377.801	9.3007	247.305	110	313.8	56.1	7.7
85.6992	16.5	526.094	8.1	38.2	33.4	216.9
5.1015	122.898	12.3046	648	24.7	130.1	16.3
660.398	750.398	184.102	283.1	158.5	428.2	6.6
45.7031	15	531.297	218	45.9	42.1	1210.3
234.098	62.801	25.297	317.9	461.8	44.2	720.2
14.9023	423.5	949.101	5.8	228.1	226.1	5.8
216.297	263.199	39.7033	5.4	50.3	8.9	231.6
21.6018	78.3008	705.797	10.6	44.6	298.5	11.4
627.601	402.801	34	209.4	194.8	137.2	525.3
604	180.801	247	1485.1	233.4	310.4	6.4
168.199	763.899	187.898	49.1	91.5	53	189.8
5.8007	268	548	9.1	105.3	156.5	7.3
8.19922	438.402	399	16.4	48.9	268.4	523.7
14.5976	98.7972	24.9062	122.3	32.3	232.1	24.5
245.102	375.5	790.5	244.5	32.5	20.3	951.2
709.801	86.6016	188.797	344.8	229.7	18.5	744.4
59.4999	440.398	728.297	160.1	19	203.2	32.5
173.699	224.801	17.6016	13.6	166.3	418.6	248.9
252.297	26.5001	1001.1	65.3	22.1	121.3	188.3
5.30473	19.6015	465.898	211	197.6	173.9	4.8
272.399	232.801	236.398	177	98.4	241	548.5
722.297	15.1992	1949.5	298.4	129.6	98.5	395.2
5.80487	217.898	164.101	78.5	25.2	119.7	22.8
6.29672	227.801	81.3986	94.7	96	7.1	5.1
266.5	224.5	487.703	292.3	399	291.4	785.5
4.20306	196.5	221.297	195	6.9	228.2	189.1
122.5	373.199	231.5	91.5	18.5	10.7	724.2
145.195	229.801	560.602	621.5	5.9	218.7	21
662.703	173.699	10.3046	52.3	465.4	27	211
14.7967	8.8008	55.8986	63.8	53.1	251.9	787.3
40.3048	14.1992	62.2968	204.4	236.9	12.6	469.3
173.898	199.199	249.898	199	29.4	153.3
82.3984	553	232.305	240.1	175.8	129.2	239.1
48.2033	204.801	217.898	5.8	13.4	129.7	493.5
356.398	231.504	27.6015	90.5	7.3	44.8	222
263.898	251.898	20.6016	80.8	92.7	20.5	231.2
51.3986	6.29675	254.297	296.9	33	49.7	560.7
5.3045	272.898	643.102	85.5	131.8	202.3	4.5
7.1016	719.602	1305.1	431.6	116.6	190.8	5.6
210.094	12.5001	205.297	233.6	304.3	65.4	6.3
8	225.703	166.203	27.4	37.3	231.5	49.5
12.8048	41.6016	659.898	19.2	21.9	7.8	62.2
6.29675	9.39831	43.8983	234	194.6	447.6	727
239.602	939	330.898	15	16.7	200.9	20.1
513.297	42.8984	10.8985	216.6	227.5	67.3	2409.1
1017.6	174.5	14.8047	22.5	38.9	215.1	5.6
163.602	79.2031	592.5	136.8	293.8	218	160.9
5.20316	49.1953	608.602	70.2	197.4	38.2	702.6
232.094	357.305	265.297	165.5	29.6	279.7	332.5
11.2031	314.297	308.602	253.5	395.2	6	9.8
290.899	11.0001	1176.7	274.8	57.9	5.5	14.4
235.601	213.5	1400.61	99.4	16.3	10.3	244
5.70319	18.6016	530.297	229.7	235.5	209.3	351.6
160.399	247.5	242.391	168		180.1	605.8
28.5	968.797	267.406	14.2	214.7	1305.8	273.5
7.49981	723.5	284.094	15.1	213.6	48.7	1476.9
173	6.80487	174.406	244.3	56.6	9	17.8
313.5	230.695	20.2967	492.9	44.1	16.5	1383.5
38.1016	12.2031	55.203	19.5	162.7	122.2	18.7
6.89829	248.695	197.5	197.7	75.5	244.2	503.8
18.1017	219.602	255.093	59.9	128.8	344.6	253.2
203.797	56.8986	232.406	173.3	103.6	160.5	264.3
690.398	7.00006	11.5003	251.8	226.9	16.4	290.4
95.0002	188.703	1467.2	6.3	32.9	62.8	188.1
705.5	8	16.7969	11	141.2	210.9	55.5
32.8986	488.297	1744.41	212.4	23.4	177	453.5
229.906	35.7032	25.0938	49.1	58.9	258.6	237.6
18.6953	24.5	884.297	135.8	186.5	39.8	5.8
166.703	989.797	66.4064	557.4	42.2	78.4	1464.7
25.7969	702.305	424.203	28.2	105.3	94.6	7.9
291.602	35.6952	262.594	12.2	234.2	291.5	6.4
154.602	232	78.7031	199.7	33.3	195.9	5.5
97.2968	17.1016	583	67	119.9	92.1	1743.7
398.5	187.203	763.797	126.9	71.2	620.7	8.3
6.20312	5.99994	268.406	145.7	5.3	53.4	16.6
18.8985	445.602	438.89	662.1	8.9	63.1	884.5
4.70325	98.1953	251.5	54.8	51.3	204.3	66.7
756.594	399.203	222.5	174.3	57.9	396	687.1
20.6017	22.9998	86.2031	81.4	167.7	43.2	1425.1
9.20306	781.195	431.703	49.7	86.7	5.6	707.2
188.695	198.102	233.203	355.9	190.4	90.6	5.5
6	269.602	27.297	264.1	42	80.8	555.2
375.601	454.5	20.8904	51.3	150.6	73.4	440.8
304.203	21.3985	231.5	6.2	67.4	223.1	248
37	210.203	15.8125	215.8	27.4	85.7	21.1
6.1015	268.602	237	20.8	20.2	232.6	240.7
16.0939	519.195	208.688	246	181.1	199.1	9.1
211	464.703	1022.5	513.7	73.7	233.3	237.8
228.305	242.195	168.609	383.9	188.3	27.9	1399.1
530	1948.6	14.2967	76.8	218.1	20	6.3
498.399	164.398	16.0938	556.1	236.9	233.1	7.8
236.297	74.4064	750.609	133.1	111.1	14.8	14.1
1635.6	491.094	203.797	31.2	231	213.1	753.2
313.898	166.602	232.203	208.6	329.1	25.5	689.9
6.40631	58.6016	252.391	28.3	231.8	137.1	14.6
157.094	227.703	17.3125	11.8	175.8	70.8	982.6
75.5	517.797	262.094	135.9	145.2	165.3	11.8
128.805	46.6016	718.203	113	80.1	252.8	267.2
365.602	9.39859	13.7967	42.7	148.4	275.4	4.7
162	55.7968	226.906	176.5	33.7	98.8	944.4
59.1953	58.5	40.094	52.2	24.6	229.9	296.5
601	168.203	127.406	11.3	6	168.5	49.4
191.398	86.7967	821	160.8	55.7	14.1	671.2
4.30463	231.203	216.093	29	76.3	15.1	5.5
5.60162	219.102	81.2969	7.5	28.1	245	7.5
55.5001	26.6016	49.5	171.9	74.2	368.7	217.3
61.8985	19.5938	670.5	142.6	97.1	123.3	16.2
163.797	256.805	12.1096	171.3	41.7	19.9	6.3
86.8982	1947.6	213.188	38.2	169.7	197.3	1210.7
399.805	180.695	21.7031	25	276.5	59.8	720.1
50.6014	24.1014	243.5	203.6	43.9	173.7	5.5
27.0938	67.6017	972.797	461.3	330	252.8	231.9
20.1016	98.1953	720.203	229.1	7.5	228.7	11.4
443.5	660.5	237.203	56	19	48.4	525.3
455.203	42.8047	12.2968	39.3	175.5	136.2	6.3
110.602	331.602	468.5	194.3	59.1	330.8	189.8
1193.3	10.5001	56.5	89	32.1	227.2	7.3
206	14.2968	168	235.4	240	28.4	523.8
5.60156	591.797	28.2031	106.3	55.4	11.7	24.5
160.399	134.906	530.906	80.6	30.5	198.9	990.5
74.4999	470	25.5939	32.7	24.9	67.8	705.1
585.703	270.5	988.094	229.6	83.3	126.5	32.5
43.7968	8.59369	706.109	19.3	32.6	146	248.8
330.203	300.5	33.2029	166.1	421	461.7	188.2
6.50006	1166.6	248.594	25.3	42.2	199.8	4.8
5.39829	13.6015	187.797	287.4	44.3	55.4	548.8
13.797	759.297	548	159.7	225.7	174	395.5
507.398	443.703	400.703	96.9	8.7	81.8	22.3
87.7031	189.797	23.2969	398.5	298.9	49.7	5
131.297	526.5	781.797	7.3	137	157	776.8
470.305	248.703	197.407	18.2	311	462.9	9.7
44.2969	268.297	382.797	471.7	52.6	51.4	188.3
226.5	284.906	341	290.1	156.5	10.8	728.3
7.60152	174	21.9062	28.7	268.8	211.6	16.9
299.797	20.0001	210.703	176	232.4	20.4	211.2
657	49.7968	787.891	13.3	19.3	9.1	787.2
510	203	468.61	133.1	7	236.7	469
10.5	254.703	236.687	248.2	12.1	513.7
17.4063	232.797		304.6	203.1	254.3
204.399	7.39846		37	418.1	206.8
418.195	649.305		22.2	121.5	556.5
121.5	818		193.9	173.8	163.2
633.305	9.99981		17.4	105.6	6.5
6.10156	10.6955		227.5	135.7	230.8
5.99994	1744.2		332.7	31.1	11.9
514.797	8.99985		197.1	66.9	467.9
229.399	16.6016		30.1	120.3	57.4
24.8983	874.094		395.8	6.6	6.7
254.102	13.9063		72.6	291.7	160.1
10.8046	63.0001		236.3	228.3	29.4
284	423.797			10.4	7.5
173.594	263.203		214.2	218.6	171.8
20.4064	474.195		269.8	22.5	313.6
54.8984	188.102		44.6	256.7	38.4
197.601	762.703		162.9	11.6	24.9
255.398	268.594		81.6	154.3	203.8
232.5	438.5		123.2	129.2	460.5
7.10162	474.703		348.8	128.7	229.8
648.898	86.1016		16.8	45.5	95.2
283	431.5		161.5	20.4	194.5
535.797	234.102		59.5	49.5	325.3
4.89859	25.7969		228.2	202.7	105.1
5.40613	22		339.2	189.6	80.9
10.7969	231		33.5	65.9	33.1
210	15		191.3	42	229
1533.3	217.797		10.1	79.9	19.3
4.80466	227.703		55.4	44.4	165.9
5.69534	1024.7		62.7	66	22.6
15.8047	167		164	7.6	296.3
121.297	13.8983		85.9	300.5	153.9
244.398	14.3986		190.4	148	96.8
506.203	256.102		209.4	184.8	398.5
12.3984	496.602		50.4	17	25.4
66.7032	204.594		27.3	65.6	9.9
686.195	231.805		20.5	215.4	461.4
660.906	252		254.6	217.7	290.1
764.5	6.29669		188.4	38.5	29.4
64.1952	272.5		454.9	248.5	176.7
204.602	718.805		111	31.9	12.8
439.101	13.6954		1116	5.5	132.7
4.99996	226		77.2	5.7	248.2
91.1016	41.5001		181.8	9.8	304.6
463.297	59.3047		24.7	209.5	37.1
5.10156	888.594		138.6	179.7	22.1
660.297	42.7033		240.6	495.7	193.5
26.4998	254.203		446.3	335	18.4
19.3985	49.1951		43.7	255.7	226.6
248.805	622.305		330	218.2	332.4
216.399	49.5001		7.5	48.3	197.5
21.7967	10.7967		19	5.9	33.7
208	213.297		175.6	21.1	392.1
419.703	18.6016		67.9	119.9	73
603.797	248.102		263.1	57	236.1
167.602	968.5		55.3	60.8
5.89856	723.297		30.5	127.2	215.2
8.60156	7.10156		24.9	345.9	269.1
14.3982	230.305		108.6	160.5	45.7
245.406	12.2967		470.3	13.3	162.5
511.399	468.297		44.8	65.8	76.4
198.398	57.0001		225.6	210.7	127.8
59.5	6.90631		9.1	176.9	104.2
173.398	188.898		298.6	36.7	226.4
252.602	7.8984		137.5	222.4	36
5.10138	488.602		314.4	40	161.6
272.5	35.5001		49.1	78	58.9
722.297	24.4998		156.3	94.8	186.4
11.5	945.899		268.5	150.1	46
267.203	44		242.6	141.6	128.1
4.29681	705.398		9.9	196	207.4
122.102	32.6016		17.8	91.2	33.5
145.703	231.602		203.5	197.2	191.1
662.695	17.1016		418.7	423.9	9.8
54.9999	187		121	35.7	55.9
173.805	6.00006		415.7	18.6	58.9
81.0937	446		217.4	62.2	253.2
49.2033	97.797		6.9	148.2	190.8
620.898	399.398		519.9	56.4	209.9
50.9999	23.2031		10.1	198.2	50.2
5.2031	9.69531		219.1	198.1	27.3
7.60171	516.305		26.3	23.8	20.1
218.094	255.398		252.6	19.7	254.5
12.5	198.102		11.7	5.5	188.2
8.40631	100.797		283.3	89.8	219.5
237.398	169.102		174.5	67.3	235.5
513.297	454.5		20.4	87	110.9
460.305	21.203		55.3	135.7	231.2
557.398	210		196.9	87.5	329.4
163.602	564.297		189.7	86	231.7
5.19519	223.297		65.9	6.3	175.8
204.102	707.305		121.5	225.7	148.2
27.8983	1948.3		110.7	44.9	77.3
11.2031	164.305		8.2	88.6	148.3
290.899	74.5937		648	66.1	33.7
235.398	477.406		282.8	53.1	24.7
5.70312	18.5001		218.7	180.3	137.2
160.695	161.594		317.7	24.3	29.5
35.7031	58.6016		5.4	22.5	73.7
6.89856	227.398		225.2	205.1	138.3
166.305	515.602		1484.8	29	169.6
313.297	49.1016		49.2	14.9	276.6
38.1017	9.20309		9.1	98.8	44.6
24.6952	56.0939		16.6	114.4	329.1
203.906	58.2029		122.2	24.2	8
690.594	169.203		244.4	137.8	19
94.6016	86.297		504.9	51.4	175.6
706.102	231.102		14.3	20.5	331
33	168.797		64.8	164.3	85.8
229.602	51.703		211.4	59.3	133.6
18.8984	25.1016		212.8	134.2	428.7
166.703	19.6954		262	60.2	42.4
317.297	255.898		78.5	274.4	44
154.203	2149.3		94.9	38.4	225.7
97.1952	8.99981		301.1	61	8.9
399.305	159.797		186.5	127	298.1
6.00006	661.203		100.3	102.7	452.5
18.8984	43.1016		613.2	147.9	48.5
4.89841	331.594		51.6	20.9	156.2
466.899	10.3047		63.6	6.8	268.6
310.102	14.6016		204.4	7.8	231.9
9.10156	265.297		439.1	14.3	20.5
188.695	326.297		5.9	148.5	18
6.203	135		90.3	49.8	203.7
375.398	470		80.8	46.4	418.6
304.398	270.602		297.1	368.6	121.2
37.0001	8.50004		85.6	123.4	415
6.20325	300.305		232.2	16.5	218.1
15.8984	1166.9		209.5	200.8	6.9
211.203	13.1016		223.3	60.1	519.8
228.5	759		27.5	173.1	229.4
332.797	444.203		19.6	252.4	26.8
196.898	189.797		233.4	6.2	252.3
498.406	775.297		15	11.5	294.9
236.195	268.297		216.8	211.3	174.2
1635.9	284.703		229.3	48.6	20.8
313.602	174.203		166.1	136.5	55.5
6.20325	19.8908		252.9	330.5	196.6
157.398	50.1092		275.7	226.4	189.9
74.7967	202.703		98.8	29	66.7
494.703	254.687		229.3	12.2	164.5
161.898	232.703		168.3	52.1	66.5
59.5	7.60938		14.2	146.5	7.8
568.102	648.797		15.5	28	649.1
32.8983	284.891		149.1	40.3	66.4
191.5	533.5		95.2	10.5	215.3
4.20312	6.31262		368.4	33.3	217.9
5.60162	14.7966		123.8	82.7	318.1
55.5001	1743.89		16.1	145.7	6
225.594	9.31238		201.3	168.7	5.4
86.9063	16.1877		59.7	293.1	10.5
190.797	873.703		173.7	156.4	209.1
208.898	14.2966		252	44	180.5
50.7033	63		6.1	54.8	1304
27.0001	423.812		11.2	173.9	48.5
20.1952	263.188		212	35.6	27
255.406	481.313		49.3	46.6	367.3
188.195	943.594		466.4	48.7	343.5
455	268.797		252.3	157.9	160.5
111	438.5		8.3	176.3	16.7
1115.6	474.797		7	269.8	63.2
77.4998	86.1094		198.3	17.6	423.4
206.102	431.703		67.9	50.5	262.1
5.797	233.687		126.8	6.1	78.8
160.203	26.1094		145.7	215.7	95.3
660.102	21.7969		462.2	9.3	487
43.7968	230.906		199.8	12.3	712.4
330.203	14.8907		54.9	8.9	115.9
6.59375	217.797		174.2	126.2	205
5.1015	228.203		81.4	110.1	396.3
14.2032	1024.5		49.4	33.5	43
507.195	166.906		356.4	180.6	5.5
55	13.8907		264.2	298.8	90.2
32.7031	14.6091		51	100.1	81.1
646.399	199.594		6	71	73.3
225.703	553		216.3	84	223.5
7.99988	204.5		20.5	129.1	85.7
299.297	231.609		246.2	73.6	232.2
451	252.188		513.6	131.8	209.9
206.203	6.703		255.5	428.1	223.1
510.5	272.203		202.1	132.8	27.4
10.297	710.203		559.7	31.1	20
17.3984	14.2031		163.3	6.4	233.4
204.601	8.79685		6.6	203	14.7
539.305	225.391		204.5	28.2	213.8
633.297	41.1094		27.9	11.6	232.2
6.40608	948.391		10.5	135.4	165.4
520.391	43.9061		135.9	101.2	253.2
9.70308	173.094		155.1	53.8	275.1
219.5	79.5001		177.9	145.4	99.3
279.406	49.203		56.2	34.2	229.8
10.7967	671.609		6.7	49.8	147.9
284.094	10.6878		160.4	6.9	20.7
173.5	213.906		29	6	13.9
20.406	18.5001		7.5	159.4	15
252.703	248.297		172.1	26.4	149.2
189.297	968.609		313.5	10.1	464.1
65.9999	723.297		38.3	171.9	123.9
232.5	6.39078		24.9	143.1	19.9
6.89065	230.812		203.9	70.9	197.2
5.10938	12		690.1	99.9	59.7
644.797	248.891		56	38.3	173.7
282.094	220		39.4	25	252.7
535.906	56.6094		194.2	157.8	228.8
4.90613	7.18762		325.5	46	48.3
5.49998	188.406		106.3	460.1	137.1
10.5	8.00027		79.5	229.8	330.4
210.297	523.406		33.2	50.2	254.2
1533.2	24.6875		229.3	44.8	12.4
4.68722	990.703		19.2	195	199.1
5.60935	701.703		166.7	24.2	68
15.8907	35.7031		24.7	65	126.5
121.5	232.094		293.1	143	146.2
244.703	16.9997		153.9	91.9	661.5
505.703	186.906		97.5	106	55
12.4064	5.8908		398.4	48.9	174.2
66.5935	445.906		25.1	32.5	82
210.797	97.7031		471.9	32.6	49.2
475.406	399.891		309.3	229.3	334.1
78.2969	23.0003		10.2	19.4	286
582.406	525.812		188	165.9	51.4
764.797	255.688		382	22	222.1
63.7971	197.906		304.6	5.3	20.9
204.797	723.797		37	119.8	245.6
439.297	21.7034		21.9	72.7	33.8
5.10938	210.094		210.2	93.2	479.5
91.094	231		229.1	134.2	254.6
377.5	333.406		334.1	25.7	207.1
85.6094	223.297		195.6	96.4	555.6
5.094	465.203		32.8	398.8	133.4
687	241.906		392.4	7.1	31.6
19.2969			73.1	18.6	208.9
234.203			236.4	9.9	38.7
14.5939				460.9	136.3
237.812			214.6	53.1	155.1
208.187			314.3	236.9	234.5
419.906			163	22.7	6.7
603.297			82.6	7.9	160.2
168.109			122.2	174.9	29.2
5.7969			364.9	13.4	7.4
8.59375			162.3	91.1	172.9
14.5			59.3	41.8	312.8
245.406			228.3	131.8	38.5
492.203			339.7	116.5	24.9
19.1875			33	303.1	203.4
198.5			191.4	37.8	460.6
59.4998			9.9	22.9	229.6
173.5			55.5	127.2	94.8
252.109			63	66.6	194.9
5.29717			163	17.1	89.4
272.406			86.4	227.8	235.8
721.688			190.8	38.9	105.1
5.99985			209.9	293.4	81.2
6.90625			50	197.3	262.1
198.203			27.2	29.7	19.5
68.3907			20.1	379.6	165.9
4.31238			254.7	66.1	25.6
122			188.3	23.6	194.5
145.594			455.2	235.9	252.3
662.906			110.8		97
55.0937			968.1	17.2	398.4
173.906			148.3	17.1	25.5
80.797			76.9	180.4	10
49.4998			181.7	213.3	461.1
620.5			24.7	56.5	290.1
51.0938			138	45	29.6
5.2969			29.3	162.4	176.8
7.60965			658.2	53.8	12.7
209.703			44.2	23.1	132.8
8.39075			329.5	127.5	248.2
12.6091			7.6	103.2	304.7
8.2969			18.8	227.1	37.2
237.297			175.7	32.6	21.9
513.5			67.9	164.7	194.1
1017.5			263.4	59.5	245.1
163.5			84.8	123.4	331.8
5.29675			25.7	63	197.5
232.109			108.8	42	33.8
11.1875			470.1	104.8	449.8
291.11			44.5	27.8	251.1
235.593			226.3	158.5
5.40655			307.2	48.5	215.1
160.594			451.7	33.3	314.4
28.4062			49	119.5	162.6
7.50017			156.7	71.6	76
173			510.6	5.6	128.7
313.203			10.6	9.2	330.5
38.297			17.9	50.8	37.1
24.7029			203.2	57.8	160
203.891			418.5	156.3	59.4
690.5			121.1	97.7	228.2
94.906			415.6	190.6	339.6
705.797			217.8	41.9	33.4
33.2968			6.8	149.7	191
229.406			519.9	19.2	10.8
18.7969			10	49.3	55.2
166.703			219.3	27.6	62.9
24.4999			26.1	20.2	249.1
292.703			252.8	179.8	190.6
154.391			11.9	74.4	210.7
97.4997			283.2	188.3	49.4
398.797			174.2	207.2	32.7
6.20318			20.4	248.2	15.5
18.9065			55.7	111	253.6
4.9997			196.7	231	188.6
466.594			190	329.1	454.9
318.703			66	231.7	111
189.297			231.4	175.8	231.6
6.90625			7.9	144.5	560.5
374.594			648.7	81.2	175.7
304			282.4	148.3	148.6
37.297			217.9	33.7	77
6.40625			318	24.7	181.8
15.9998			5.7	6.5	24.9
211			16	54.9	62.1
228.203			209.6	76.1	75.4
332.5			1484.8	28.6	102.8
197.094			49	74.1	584.6
425.5			25.6	96.9	44.7
73.2031			122.3	41.8	329
236			243.3	169.3	7.9
			506.2	164.9	18.9
			13.4	112	175.6
			65.7	44.2	330.9
			210.9	75.8	85.8
			213	160.5	603.8
			262.4	93.3	44.8
			78.5	7.8	226.1
			94.9	19.1	9
			301.1	175.2	298.5
			186.1	59	452
			100.7	272.3	48.4
			612.4	55.1	156.8
			52.3	30.6	268.3
			63.5	25.1	251.9
			204.4	82.3	18.4
			420.4	26.8	203.9
			19.2	170.4	539.4
			95.9	256.9	415.2
			80.7	42.3	218.1
			296.8	44.2	6.9
			85.7	188.4	519.6
			432.3	38.2	229.4
			232.8	8.6	278.8
			27.4	168.7	295.3
			19.8	129.7	174.4
			234.8	137.1	20.6
			13.7	310.6	252.6
			216.5	52.6	189
			21.9	156.9	66.4
			207.4	268.2	231.7
			166.2	232.5	7.8
			253.3	20	649.6
			275.5	18.1	65.9
			98.1	203.5	215.4
			229.9	32.9	218.9
			168.1	237.7	317.4
			14.3	143.3	5.8
			15.1	126	15.5
			244.7	50	209.6
			492.5	123.5	1010
			19.3	104.5	474.6
			197.8	136.9	49.6
			59.9	31.4	9.1
			173.5	66.8	16.7
			252.4	120.3	366.6
			6.1	6.9	504.4
			11.3	290.6	16.6
			260	229	62.9
			468.4	10.5	210.8
			243.2	218.6	212.8
			11.8	22.3	262.6
			11.1	256.9	78.6
			199.2	11.7	95.1
			67.2	153.2	486.9
			126.8	72.6	713
			145.8	57.8	54
			662	128.2	61.9
			54.8	46	204.5
			174.2	17.2	439.2
			81.5	29.8	96
			49.4	24	81.2
			357.2	144.1	73.7
			263.2	57.6	223
			51.4	189.2	85.3
			12.8	66.2	233
			209.5	40.9	209.5
			20.5	55.2	223.2
			246.1	69.6	27.8
			513.6	66.5	21.8
			457.6	7.8	230.9
			559.6	230.4	14.8
			163.2	70.4	217
			6.5	147.5	229.4
			231.3	173.5	418.2
			11.6	27.8	275.6
			290.8	65.6	329.1
			230.7	36.9	167.9
			10	178.8	13.9
			160.9	217.9	14.9
			29	38	149
			7.5	249.1	95.8
			172.4	31.5	368.8
			313.3	5.6	124.1
			38.1	5.8	19.6
			25.4	10.1	197.3
			203.4	209.2	59.7
			690.4	108.3	173.6
			56.4	71.9	252.3
			38.6	495.1	229.7
			195.2	334.9	48.3
			429.9	255.5	466.3
			80.6	218.8	255.3
			33.3	48	12.2
			229.2	6.1	199.3
			19.1	21.3	67.6
			166.6	118.6	126.8
			24.9	58	145.8
			293.2	61.3	661.6
			153.5	126.7	55.3
			97.8	345.9	173.8
			398.3	160.8	82.2
			7.3	13.3	49.4
			17.9	65.9	158.2
			471.8	210.3	462.9
			308.8	177.1	50.3
			10.7	36.5	11.9
			175.9	222.6	212.4
			12.8	39.9	22.2
			381.2	78.1	242
			304.6	94.7	513.7
			37.1	150.2	254.3
			22	141.5	129.2
			194.9	195.9	77.6
			244	91.2	555.9
			333.2	197.2	133.6
			196.7	423.9	31.3
			29.8	34.6	236.6
			395.9	19.4	11.9
			72.6	62.5	524.8
			236.2	146.5	7
				58.3	160.1
				112.7	29.3
				85.9	391.9
				133.6	101
				63.7	38.6
				24.4	25.6
				19.5	203.1
				5.6	689.8
				89.5	94.8
				67	195.1
				87.3	324.3
				135.6	187.1
				87.9	33.2
				85.7	228.8
				6.3	19.6
				139.8	166
				85.9	25.4
				37.2	448.1
				95.8	96
				67.1	398.2
				52.4	25.5
				180.7	10
				24.1	462.8
				22.8	309.6
				204.8	185.1
				28.9	12.7
				15.3	380.8
				212.8	303.6
				24.5	38.2
				137.7	22.2
				51.2	193.8
				20.7	245.7
				164.3	331.7
				58.6	197.3
				134.6	33.5
				60.4	392.3
				203.5	73.2
				71.4	235.6
				49.4
				49.7
				126.5
				103.2
				53.1
				94.8
				21
				7.1
				7.7
				13.9
				148.5
				49.8
				46.3
				181.8
				186.9
				123.6
				16.1
				201.2
				59.7
				147.8
				26.2
				195.7
				56.3
				6.1
				12.1
				44.2
				156.4
				10.4
				48.2
				136.4
				246.4
				83.9
				59.4
				167.2
				29.1
				12.3
				52.3
				146.4
				67.9
				5.9
				38
				82.7
				143.1
				170.7
				293.8
				156.3
				44
				15.8
				39.3
				173.6
				35.5
				36.4
				11.2
				48.1
				157.4
				176.2
				23.6
				217.9
				45.5
				42.6
				9.4
				5.8
				215.1
				9
				12.6
				9.1
				125.2
				110.8
				33.2
				180.4
				299.2
				89.3
				82.2
				83.3
				55.1
				74.5
				73.5
				131.8
				428
				133.2
				31
				6.5
				202.8
				28.1
				11.9
				50.5
				58.5
				27.2
				99.8
				53.7
				145.4
				33.7
				50.9
				6.9
				6.1
				159.1
				26.1
				10.6
				172
				142.6
				70.1
				101.1
				38.4
				25
				156.9
				46.5
				460.3
				230
				50
				44.8
				195.1
				24.3
				64.6
				143.4
				91.9
				105.8
				47.2
				31.8
				35.1
				229.3
				19.5
				165.9
				21.7
				5.3
				120.3
				73
				92.5
				134.6
				25.2
				96.4
				398.9
				7
				18.9
				10
				38.7
				421.8
				53
				117.2
				120.1
				21.4
				9.2
				29.8
				145.1
				13.5
				90.6
				42.1
				131.4
				74.8
				42.2
				303
				37.7
				7.2
				16.2
				127.1
				66.3
				17.6
				227.3
				38.7
				293.4
				197.6
				29.7
				259.9
				120
				17.9
				48.2
				23.4
				235.7
				17.6
				16
				181.5
				213.3
				55.9
				45.7
				7.8
				43.4
				111.2
				53.1
				23.7
				127.4
				103.4
				227
				32.2
				141.7
				24.2
				58.8
				122.4
				63.9
				41.5
				105.3
				27.6
				156.8
				50.4
				33.2
				119.7
				71.5
				5.5
				5.9
				2.9
				51.6
				57.3
				156.6
				98
				190.4
				41.8
				149.5
				19.7
				49
				27.8
				20.3
				179.8
				74.3
				188.4
				170.2
				48.5
				236.3
				111
				230.9
				27.8
				301.6
				94.5
				137.2
				175.8
				144.6
				80.8
				122.7
				26.3
				33.2
				21.7
				4.8
				59.4
				76.1
				28.7
				74.1
				96.1
				42.8
				169
				163.7
				113.5
				44.1
				75.7
				160.3
				93.4
				8
				19.2
				37.5
				137.5
				58.9
				31.3
				241.1
				55.1
				30.9
				24.8
				82
				27.5
				170.8
				256.2
				42.4
				44.2
				188.4
				38.2
				8.7
				168.1
				130.2
				73.6
				63.9
				220.1
				90.4
				52.2
				156.8
				268.2
				171.3
				61.7
				19.8
				18.2
				203.4
				32.9
				91
				146.4
				143.9
				125.4
				49.8
				123.5
				104.8
				137
				31.2
				66.8
				120.4
				7.1
				166.1
				124.3
				229.1
				10.5
				218.5
				22.4
				137.6
				119.2
				11.9
				152.7
				72.2
				58.7
				128.2
				45.9
				17.5
				29.4
				24.3
				143.9
				57.7
				189.1
				66.2
				41
				54.5
				69.7
				67
				7.9
				230.3
				70.2
				147.5
				184.7
				17.4
				64.9
				36.3
				179.5
				218
				37.7
				249.3
				31.5
				5.7
				5.5
				10.5
				208.8
				107.8
				72.2
				171.8
				307.3
				350.7
				213.8
				42.1
				218.6
				48.1
				6.4
				6
				15.6
				118
				58.1
				60.9
				127.3
				346
				160.6
				13.3
				66
				119.8
				90.6
				177.1
				36.5
				137.4
				85.2
				39.9
				78.3
				94.4
				150
				141.9
				18.9
				176.8
				90.9
				196.7
				424.8
				34.1
				19.9
				62.3
				146.5
				58.4
				112.5
				82.5
				137.2
				63.8
				24.3
				19.5
				5.5
				89.6
				66.9
				87.3
				135.7
				87.9
				85.7
				6.3
				139.8
				85.8
				36.6
				96.5
				66.8
				11.9
				41
				120.3
				60.4
				24.1
				22.7
				204.9
				28.9
				15.1
				97.2
				115.5
				24.7
				39.1
				98.5
				50.9
				20.8
				164.5
				58.3
				134.6
				60.7
				274.8
				37.6
				61.6
				87.1
				142.5
				53.1
				94.6
				21.4
				6.9
				7.9
				14.3
				147.9
				49.8
				46.2
				181.5
				187.3
				123.7
				16.2
				201
				59.8
				147.5
				26.5
				195.5
				56.5
				6.1
				11.7
				44.6
				156
				10.8
				48
				136.6
				246.3
				84
				59.4
				167.2
				29.2
				12.3
				52.4
				141.8
				31.4
				41.2
				5.4
				37.8
				82.9
				142.9
				102.2
				68.3
				294.5
				156
				44.1
				15.6
				39.5
				173.6
				35.5
				36.3
				11.7
				47.9
				157.2
				176.5
				23.6
				217.6
				45.5
				41.5
				10.5
				5.7
				215.3
				9.1
				12.7
				9
				125.3
				110.7
				33.1
				180.5
				299.3
				89.2
				82
				83.6
				55.5
				74
				45.5
				32.4
				127.6
				109.2
				318.6
				133.3
				31
				6.2
				203
				28.2
				11.7
				50.3
				58.1
				27.8
				100.1
				53.6
				145.4
				33.7
				50.7
				7
				6.1
				159
				26.4
				10.4
				120.8
				51.4
				142.1
				70
				101.3
				38.6
				24.8
				156.9
				46.5
				460.5
				229.9
				49.9
				44.9
				195.1
				23.7
				65
				69.6
				74.1
				91.8
				105.9
				47.2
				32.1
				34.7
				229.1
				19.8
				165.8
				21.6
				5.4
				120
				42.8
				31.1
				91.5
				134.9
				25.3
				30.1
				66.5
				398.6
				7.2
				18.8
				9.7
				37.7
				358.1
				65.2
				53
				237
				20.6
				10.1
				29.4
				145.4
				13.6
				8.3
				81.6
				42.7
				131.3
				74.5
				42.7
				219.5
				83.4
				37.9
				7.2
				16.1
				126.5
				66.8
				17.4
				227.5
				38.7
				293.4
				197.6
				29.7
				80.1
				179.7
				120
				65.8
				20.2
				239.4

## Sheet: Fig 6O 6P 6Q
Figure 6O - Dynamic ISI Time Course - In Silico - Rep Model			Figure 6P - Dynamic ISI Time Course - Ex Vivo - Rep Cell			Figure 6Q: Overlay of 6O & 6P
Time (s)	ISI (ms)		Time (s)	ISI (ms)
1.9546	78.2		2.0355	248.4
2.0328	209		2.2839	209.3
2.2418	29.6		2.4932	191.3
2.2714	11.7		2.6845	757.6
2.2831	208.7		3.4421	432.5
2.4918	4.8		3.8746	112.8
2.4966	190.6		3.9875	10.5999
2.6872	6		3.9976	1921.9
2.6932	589.2		5.92	298.8
3.2824	88.7		6.2188	603.6
3.3711	502.9		6.8223	457.6
3.874	112.7		7.2799	10.8002
3.9867	4.1		7.2905	12.2998
3.9908	5.2		7.3025	167.2
3.996	311.3		7.4702	1233.7
4.3073	459.8		8.7039	136
4.7671	454.6		8.8399	159.6
5.2217	15.8		8.9995	114.699
5.2375	607.4		9.1142	12.8008
5.8449	73.7		9.1267	592.9
5.9186	299.4		9.7199	354.9
6.218	602.2		10.0749	76.8993
6.8202	5.4		10.1517	149.601
6.8256	452.3		10.3014	210
7.2779	5.5		10.5114	138.7
7.2834	5.9		10.65	112.1
7.2893	5.2		10.7622	67.2003
7.2945	6.2		10.8294	129.3
7.3007	168.7		10.9586	121.6
7.4694	9		11.0802	116.2
7.4784	90		11.1965	29.5002
7.5684	36.7		11.2258	44.9002
7.6051	91.8		11.2707	62.0997
7.6969	657.8		11.3329	51.7001
8.3547	178.5		11.3845	83.5998
8.5332	169.8		11.4683	58.7001
8.703	5.5		11.5269	115.8
8.7085	130.2		11.6428	31.8008
8.8387	160.1		11.6743	84.699
8.9988	5.1		11.7592	58.7004
9.0039	7.1		11.8178	143.3
9.011	101.7		11.9613	84.5
9.1127	9.8		12.0458	103.5
9.1225	8.5		12.1492	255.801
9.131	5		12.405	403.199
9.136	233.4		12.8083	162.101
9.3694	349.1		12.9703	165.1
9.7185	360.1		13.1354	77.2
10.0786	80.1		13.2126	265.6
10.1587	73.9		13.4783	57.2001
10.2326	76.9		13.5354	193
10.3095	205.8		13.7285	110.901
10.5153	62.7		13.8393	233.3
10.578	81		14.0725	123
10.659	108		14.1956	64.7005
10.767	85.5		14.2603	71.0996
10.8525	114.5		14.3313	72.7996
10.967	130.5		14.4042	33.6005
11.0975	134		14.4376	170.3
11.2315	151.8		14.608	51.0996
11.3833	20.5		14.659	85.3009
11.4038	269.4		14.7444	96.8994
11.6732	151.5		14.8414	262.3
11.8247	148.8		15.1037	27.1005
11.9735	77.7		15.1306	237
12.0512	102		15.3679	41.2002
12.1532	46.1		15.4089	104
12.1993	127.8		15.513	434.9
12.3271	82.3		15.9479	85.0001
12.4094	21.3		16.0328	122.101
12.4307	98.2		16.1549	183
12.5289	231.2		16.3379	124.6
12.7601	87.1		16.4625	221.301
12.8472	96.5		16.6839	632
12.9437	38.7		17.316	112.199
12.9824	224.6		17.4282	294.9
13.207	42.7		17.7231	159.901
13.2497	91		17.8829	597.5
13.3407	68.1		18.4804	166.6
13.4088	73.3		18.647	126.4
13.4821	59.8		18.7735	200.399
13.5419	192.8		18.9738	446.5
13.7347	118.4		19.4203	298.601
13.8531	43.1		19.7189	352.099
13.8962	131.9		20.071	168.799
14.0281	42.9		20.2398	148.8
14.071	265.3		20.3886	353.2
14.3363	85.9		20.7418	66.5
14.4222	18.5		20.8083	114.9
14.4407	216.1		20.9232	325.4
14.6568	13.9		21.2486	248.901
14.6707	72.7		21.4974	118.4
14.7434	103.8		21.6158	262.299
14.8472	34.1		21.8782	148.201
14.8813	107.2		22.0263	328.599
14.9885	123.5		22.355	13.6994
15.112	17.6		22.3683	332.1
15.1296	242.9		22.7008	126.601
15.3725	31.3		22.8274	20.5001
15.4038	117.6		22.8478	218.699
15.5214	8.3		23.0666	6.40048
15.5297	150.3		23.0732	105.699
15.68	41.6		23.1787	203.201
15.7216	30		23.3818	47.8984
15.7516	88.9		23.4298	197.801
15.8405	200.3		23.6275	13.4003
16.0408	113.2		23.6406	99.7989
16.154	40.3		23.7407	14.801
16.1943	65.4		23.7553	349.301
16.2597	76.7		24.1048	197
16.3364	87.7		24.3019	166.299
16.4241	44.7		24.4681	207.9
16.4688	214.1		24.6761	558.901
16.6829	136		25.235	154.699
16.8189	130.5		25.3897	7.30102
16.9494	124		25.3968	464.9
17.0734	123		25.8619	9.89844
17.1964	118.8		25.8714	360.701
17.3152	18.7		26.2325	220.699
17.3339	98.3		26.4531	200.5
17.4322	9.9		26.6536	170.701
17.4421	145.6		26.8244	391.699
17.5877	137.9		27.216	363
17.7256	84.8		27.5791	211.5
17.8104	71.4		27.7906	811.901
17.8818	51.4		28.6025	457.799
17.9332	233.4		29.0603	108.601
18.1666	75.2		29.1689	336
18.2418	150.9		29.5049	77.1992
18.3927	73.6		29.5819	7.99987
18.4663	22.1		29.5897	235.801
18.4884	125		29.8258	8.79861
18.6134	32.4		29.8345	6.80089
18.6458	7.5		29.8414	197.699
18.6533	318.7		30.0392	81
18.972	16.5		30.12	283.801
18.9885	18.5		30.404	705.799
19.007	42.4		31.1098	207.102
19.0494	214.4		31.3168	6.39811
19.2638	155.6		31.3236	569.9
19.4194	7.5		31.8932	889.502
19.4269	102		32.7827	590.5
19.5289	256.6		33.3732	149.5
19.7855	45.2		33.5227	221.098
19.8307	238		33.7438	89.6991
20.0687	111.2		33.8334	10.8009
20.1799	59.1		33.8443	322.699
20.239	12.1		34.167	439.602
20.2511	136.1		34.6066	7.10184
20.3872	23		34.6133	521.199
20.4102	150.6		35.1349	226.399
20.5608	60.8		35.3613	499.402
20.6216	25.8		35.8607	394.5
20.6474	92.5		36.2552	665.699
20.7399	73.2		36.9209	920.801
20.8131	108.9		37.8417	656.598
20.922	9.4		38.4984	493.102
20.9314	167.1		38.9914	27.3007
21.0985	43.3		39.0187	804.098
21.1418	115.1		39.8228	210.301
21.2569	8.4
21.2653	225.7
21.491	12.3
21.5033	111
21.6143	102.2
21.7165	106.3
21.8228	175.8
21.9986	26.5
22.0251	332
22.3571	8.1
22.3652	8.9
22.3741	449.9
22.824	10.4
22.8344	16.4
22.8508	9.6
22.8604	200.5
23.0609	10.3
23.0712	102.7
23.1739	11.5
23.1854	149.9
23.3353	45.8
23.3811	8.7
23.3898	44
23.4338	190.5
23.6243	14.9
23.6392	100.4
23.7396	9.8
23.7494	5
23.7544	290.2
24.0446	57.1
24.1017	9.5
24.1112	11.5
24.1227	176.7
24.2994	8.9
24.3083	153.1
24.4614	5.8
24.4672	6.3
24.4735	200.3
24.6738	565.6
25.2394	146.3
25.3857	8.4
25.3941	6.8
25.4009	459.5
25.8604	10.2
25.8706	355.1
26.2257	10.9
26.2366	218.7
26.4553	13.6
26.4689	181.6
26.6505	8.1
26.6586	169.7
26.8283	386.3
27.2146	115.9
27.3305	253.2
27.5837	14.4
27.5981	74.8
27.6729	120.9
27.7938	6.6
27.8004	800.9
28.6013	7.8
28.6091	454.5
29.0636	103.1
29.1667	342.3
29.509	5.4
29.5144	65.9
29.5803	7.1
29.5874	6.1
29.5935	238.7
29.8322	6.4
29.8386	6.3
29.8449	65.9
29.9108	131.3
30.0421	76.3
30.1184	280.8
30.3992	9.3
30.4085	700.4
31.1089	8
31.1169	199.2
31.3161	5.3
31.3214	1378.8
32.7002	286.4
32.9866	392.2
33.3788	371.4
33.7502	85.9
33.8361	6.4
33.8425	89.4
33.9319	234.4
34.1663	439
34.6053	5.8
34.6111	527.3
35.1384	218
35.3564	4.3
35.3607	4.8
35.3655	190.2
35.5557	1368.3
36.924	916.4
37.8404	11.4
37.8518	1096.3
38.9481	45.2
38.9933	21.6
39.0149	345.6
39.3605	175.1
39.5356	290.2
39.8258	211.2
