# Supplementary material for: State-dependent activity dynamics of hypothalamic stress effector neurons
Source: eLife journal article supplement (doi:10.7554/elife.76832), 2022-06-30
Supplement: supp [file elife-76832-supp-v1.zip]

## Sheet: Fig 5E
Figure 5E - In Silico - Spikes per Burst Distribution
	Fraction Bursts
Model Neuron	2	3	4	5	6
1	0.439331	0.393305	0.129707	0.0251046	0.0125523
2	0.496774	0.348387	0.129032	0.0193548	0.00645161
3	0.334677	0.439516	0.157258	0.0604839	0.00806452
4	0.401914	0.430622	0.114833	0.0478469	0.00478469
5	0.582418	0.285714	0.0879121	0.032967	0.010989
6	0.566038	0.320755	0.103774	0	0.00943396
7	0.48951	0.363636	0.111888	0.020979	0.013986
8	0.465517	0.344828	0.137931	0.0431034	0.00862069
9	0.594937	0.278481	0.113924	0	0.0126582
10	0.436275	0.362745	0.137255	0.0441176	0.0196078
11	0.38189	0.437008	0.133858	0.0354331	0.011811
12	0.327273	0.476364	0.130909	0.0509091	0.0145455
13	0.637363	0.307692	0.032967	0.021978	0
14	0.408333	0.383333	0.133333	0.0666667	0.00833333
15	0.386266	0.433476	0.124464	0.0386266	0.0171674
16	0.474886	0.369863	0.109589	0.0273973	0.0182648
17	0.33557	0.496644	0.127517	0.033557	0.00671141
18	0.463768	0.36715	0.135266	0.0289855	0.00483092
19	0.420118	0.426036	0.100592	0.0473373	0.00591716
20	0.552941	0.341176	0.0823529	0.0117647	0.0117647
21	0.432292	0.416667	0.0885417	0.0520833	0.0104167
22	0.41573	0.466292	0.0955056	0.0224719	0
23	0.662162	0.297297	0.0405405	0	0
24	0.561798	0.337079	0.0730337	0.0168539	0.011236
25	0.379747	0.42616	0.135021	0.0464135	0.0126582
26	0.504274	0.376068	0.111111	0.00854701	0
27	0.328413	0.479705	0.143911	0.0332103	0.0147601
28	0.482927	0.326829	0.15122	0.0243902	0.0146341
29	0.50365	0.357664	0.080292	0.0510949	0.00729927
30	0.369919	0.439024	0.142276	0.0243902	0.0243902
31	0.322807	0.484211	0.14386	0.0421053	0.00701754
32	0.560345	0.353448	0.0344828	0.0517241	0
33	0.40873	0.420635	0.126984	0.031746	0.0119048
34	0.566372	0.345133	0.0707965	0.0176991	0
35	0.439791	0.408377	0.115183	0.026178	0.0104712
36	0.465608	0.328042	0.15873	0.037037	0.010582
37	0.337209	0.409884	0.188953	0.0581395	0.00581395
38	0.531746	0.325397	0.111111	0.031746	0
39	0.49375	0.3875	0.075	0.04375	0
40	0.530612	0.387755	0.0714286	0.0102041	0
41	0.309091	0.494545	0.156364	0.0327273	0.00727273
42	0.577778	0.303704	0.0888889	0.0296296	0
43	0.645161	0.241935	0.0967742	0.016129	0
44	0.441176	0.411765	0.117647	0.0176471	0.0117647
45	0.465517	0.362069	0.137931	0.0258621	0.00862069
46	0.488889	0.333333	0.140741	0.0148148	0.0222222
47	0.381356	0.449153	0.118644	0.0423729	0.00847458
48	0.590909	0.333333	0.0606061	0	0.0151515
49	0.49375	0.35	0.09375	0.05	0.0125
50	0.671642	0.298507	0.0298507	0	0
51	0.347432	0.465257	0.129909	0.0543807	0.00302115
52	0.256684	0.497326	0.147059	0.0668449	0.0320856
53	0.33123	0.432177	0.157729	0.0662461	0.0126183
54	0.580952	0.295238	0.104762	0.0190476	0
55	0.424242	0.368687	0.136364	0.0707071	0
56	0.401316	0.427632	0.111842	0.0592105	0
57	0.448276	0.386207	0.110345	0.0413793	0.0137931
58	0.349138	0.431034	0.133621	0.0517241	0.0344828
59	0.55	0.35	0.0875	0.0125	0
60	0.588235	0.294118	0.105882	0.0117647	0
61	0.486842	0.328947	0.131579	0.0526316	0
62	0.603175	0.269841	0.111111	0.015873	0
63	0.546392	0.350515	0.0721649	0.0309278	0
64	0.490196	0.421569	0.0588235	0.0196078	0.00980392
65	0.51938	0.364341	0.0930233	0.0155039	0.00775194
66	0.631579	0.276316	0.0789474	0.0131579	0
67	0.619048	0.333333	0.047619	0	0
68	0.577778	0.344444	0.0666667	0.0111111	0
69	0.566667	0.344444	0.0666667	0.0111111	0.0111111
70	0.469697	0.393939	0.121212	0.0151515	0
71	0.605263	0.263158	0.118421	0.0131579	0
72	0.56	0.293333	0.12	0.0133333	0.0133333
73	0.634146	0.256098	0.0609756	0.0365854	0.0121951
74	0.577586	0.353448	0.0517241	0.00862069	0.00862069
75	0.577778	0.288889	0.122222	0.0111111	0
76	0.472973	0.391892	0.114865	0.0135135	0.00675676
77	0.509615	0.375	0.105769	0.00961538	0
78	0.452128	0.409574	0.106383	0.0319149	0
79	0.411043	0.417178	0.141104	0.0306748	0
80	0.5625	0.375	0.03125	0.03125	0
81	0.466667	0.313333	0.146667	0.0533333	0.02
82	0.429752	0.413223	0.140496	0.0165289	0
83	0.609375	0.28125	0.109375	0	0
84	0.5	0.344828	0.112069	0.0431034	0
85	0.514851	0.366337	0.0891089	0.019802	0.00990099
86	0.513369	0.342246	0.101604	0.0427807	0
87	0.56	0.36	0.0533333	0.0266667	0
88	0.5	0.4375	0.0625	0	0
89	0.671053	0.289474	0.0263158	0.0131579	0
90	0.452381	0.404762	0.111111	0.015873	0.015873
91	0.403846	0.410256	0.160256	0.0192308	0.00641026
92	0.521368	0.376068	0.0598291	0.042735	0
93	0.42487	0.419689	0.0984456	0.0518135	0.00518135
94	0.494118	0.341176	0.141176	0.0117647	0.0117647
95	0.469697	0.484848	0.0151515	0.030303	0
96	0.551282	0.358974	0.0769231	0.0128205	0
97	0.490909	0.336364	0.136364	0.0272727	0.00909091
98	0.585366	0.317073	0.0853659	0.0121951	0
99	0.392157	0.437908	0.124183	0.0392157	0.00653595
100	0.555556	0.301587	0.126984	0.015873	0
101	0.580645	0.33871	0.0806452	0	0
102	0.46875	0.427083	0.0833333	0.0208333	0
103	0.54386	0.350877	0.0964912	0.00877193	0
104	0.633333	0.3	0.0444444	0.0222222	0
105	0.482143	0.419643	0.0625	0.0357143	0
106	0.565217	0.369565	0.0543478	0.0108696	0
107	0.450382	0.389313	0.114504	0.0381679	0.00763359
108	0.495726	0.384615	0.0683761	0.042735	0.00854701
109	0.424658	0.40411	0.130137	0.0273973	0.0136986
110	0.5	0.396226	0.103774	0	0
111	0.459016	0.420765	0.0928962	0.0163934	0.010929
112	0.650602	0.277108	0.0361446	0.0361446	0
113	0.427778	0.427778	0.0944444	0.0388889	0.0111111
114	0.637681	0.289855	0.057971	0.0144928	0
115	0.6	0.385714	0.0142857	0	0
116	0.331967	0.454918	0.143443	0.057377	0.0122951
117	0.39819	0.484163	0.0723982	0.040724	0.00452489
118	0.473988	0.346821	0.121387	0.0346821	0.0231214
119	0.639344	0.262295	0.0983607	0	0
120	0.527273	0.363636	0.0727273	0.0272727	0.00909091
121	0.526316	0.300752	0.120301	0.037594	0.0150376
122	0.559748	0.314465	0.0943396	0.0251572	0.00628931
123	0.512821	0.316239	0.153846	0.017094	0
124	0.491667	0.408333	0.0833333	0.0166667	0
125	0.578947	0.326316	0.0631579	0.0315789	0
126	0.681416	0.238938	0.0707965	0.00884956	0
127	0.553846	0.384615	0.0461538	0.0153846	0
128	0.453125	0.429688	0.078125	0.03125	0.0078125
129	0.730159	0.238095	0.015873	0	0.015873
130	0.54717	0.254717	0.141509	0.0566038	0
131	0.319588	0.469072	0.164948	0.0412371	0.00515464
132	0.464481	0.355191	0.114754	0.0546448	0.010929
133	0.331126	0.463576	0.125828	0.0662252	0.013245
134	0.510791	0.345324	0.122302	0.00719424	0.0143885
135	0.6125	0.2625	0.0625	0.0625	0
136	0.505155	0.329897	0.123711	0.0412371	0
137	0.519608	0.352941	0.107843	0.0196078	0
138	0.519084	0.366412	0.0992366	0.0152672	0
139	0.471698	0.396226	0.103774	0.0283019	0
140	0.575342	0.356164	0.0684932	0	0
141	0.527473	0.351648	0.0879121	0.021978	0.010989
142	0.601942	0.281553	0.0970874	0.0194175	0
143	0.553398	0.271845	0.126214	0.038835	0.00970874
144	0.36	0.426667	0.151111	0.0533333	0.00888889
145	0.470588	0.362745	0.117647	0.0343137	0.0147059
146	0.605634	0.309859	0.028169	0.0422535	0.0140845
147	0.453488	0.406977	0.127907	0	0.0116279
148	0.505882	0.382353	0.0882353	0.0117647	0.0117647
149	0.462366	0.44086	0.0967742	0	0
150	0.482517	0.370629	0.132867	0.013986	0
151	0.567164	0.343284	0.0597015	0.0149254	0.0149254
152	0.62963	0.271605	0.0740741	0.0246914	0
153	0.554455	0.366337	0.0693069	0.00990099	0
154	0.505882	0.364706	0.117647	0	0.0117647
155	0.593023	0.302326	0.0697674	0.0232558	0.0116279
156	0.527027	0.445946	0.027027	0	0
157	0.356557	0.459016	0.147541	0.0204918	0.0163934
158	0.536232	0.362319	0.0724638	0.0144928	0.0144928
159	0.431818	0.424242	0.143939	0	0
160	0.448	0.416	0.12	0.016	0
161	0.608696	0.26087	0.0869565	0.0434783	0
162	0.603053	0.274809	0.0916031	0.0229008	0.00763359
163	0.594595	0.306306	0.0720721	0.027027	0
164	0.481283	0.336898	0.117647	0.0534759	0.0106952
165	0.461039	0.422078	0.0909091	0.025974	0
166	0.486726	0.345133	0.0973451	0.0619469	0.00884956
167	0.5	0.320513	0.141026	0.0384615	0
168	0.416667	0.416667	0.115079	0.0396825	0.0119048
169	0.458101	0.329609	0.162011	0.027933	0.0223464
170	0.496855	0.371069	0.0943396	0.0377358	0
171	0.534091	0.329545	0.102273	0.0227273	0.0113636
172	0.322807	0.484211	0.14386	0.0421053	0.00701754
173	0.574468	0.361702	0.0531915	0.0106383	0
174	0.605263	0.289474	0.0921053	0.0131579	0
175	0.433962	0.421384	0.081761	0.0440252	0.0188679
176	0.626506	0.26506	0.108434	0	0
177	0.536232	0.318841	0.101449	0.0289855	0.0144928
178	0.533333	0.333333	0.1	0.0333333	0
179	0.603175	0.31746	0.0634921	0.015873	0
180	0.512397	0.413223	0.0578512	0.0165289	0
181	0.536232	0.34058	0.0942029	0.0217391	0.00724638
182	0.567164	0.343284	0.0895522	0	0
183	0.540541	0.36036	0.0810811	0.018018	0
184	0.586538	0.346154	0.0480769	0.0192308	0
185	0.671642	0.223881	0.0895522	0.0149254	0
186	0.422764	0.382114	0.134146	0.0406504	0.0203252
187	0.58209	0.343284	0.0597015	0.0149254	0
188	0.402062	0.494845	0.0927835	0	0.0103093
189	0.557143	0.357143	0.0714286	0.0142857	0
190	0.450237	0.393365	0.109005	0.0379147	0.00947867
191	0.46	0.38	0.14	0.01	0.01
192	0.508929	0.348214	0.125	0.00892857	0.00892857
193	0.503597	0.388489	0.0863309	0.0215827	0
194	0.609375	0.265625	0.09375	0.03125	0
195	0.487952	0.385542	0.0843373	0.0301205	0.0120482
196	0.440559	0.426573	0.0769231	0.041958	0.013986
197	0.535211	0.380282	0.0704225	0.0140845	0
198	0.628205	0.269231	0.102564	0	0
199	0.527778	0.388889	0.0694444	0.0138889	0
200	0.484848	0.378788	0.0833333	0.0530303	0
201	0.594059	0.306931	0.0594059	0.029703	0.00990099
202	0.530303	0.30303	0.136364	0.030303	0
203	0.525547	0.306569	0.153285	0.00729927	0.00729927
204	0.483333	0.391667	0.0916667	0.0166667	0.0166667
205	0.572816	0.339806	0.0679612	0.0194175	0
206	0.5125	0.4125	0.05	0.0125	0.0125
207	0.552083	0.291667	0.104167	0.0416667	0.0104167
208	0.569231	0.353846	0.0461538	0.0307692	0
209	0.442308	0.435897	0.0769231	0.0384615	0.00641026
210	0.630952	0.27381	0.0714286	0.0238095	0
211	0.607143	0.309524	0.0714286	0	0.0119048
212	0.617647	0.308824	0.0441176	0.0294118	0
213	0.63	0.3	0.06	0.01	0
214	0.443396	0.419811	0.0990566	0.0330189	0.00471698
215	0.588235	0.303922	0.0588235	0.0490196	0
216	0.404167	0.416667	0.125	0.0375	0.0166667
217	0.686567	0.253731	0.0298507	0.0298507	0
218	0.566667	0.333333	0.0833333	0	0.0166667
219	0.465116	0.383721	0.104651	0.0465116	0
220	0.576923	0.358974	0.0512821	0.0128205	0
221	0.380682	0.443182	0.102273	0.0625	0.0113636
222	0.614458	0.301205	0.060241	0.0240964	0
223	0.60274	0.273973	0.0684932	0.0547945	0
224	0.40708	0.469027	0.0707965	0.0530973	0
225	0.639344	0.262295	0.0819672	0.0163934	0
226	0.527473	0.351648	0.0989011	0.021978	0
227	0.515625	0.359375	0.09375	0.015625	0.015625
228	0.376068	0.478632	0.111111	0.025641	0.00854701
229	0.507246	0.275362	0.173913	0.0434783	0
230	0.459459	0.378378	0.135135	0.0202703	0.00675676
231	0.557143	0.271429	0.128571	0.0428571	0
232	0.406977	0.434109	0.124031	0.0348837	0
233	0.535032	0.318471	0.089172	0.0382166	0.0191083
234	0.503145	0.358491	0.100629	0.0188679	0.0188679
235	0.58209	0.268657	0.119403	0	0.0298507
236	0.510204	0.397959	0.0612245	0.0306122	0
237	0.423963	0.423963	0.105991	0.0276498	0.0184332
238	0.519481	0.363636	0.0909091	0.012987	0.012987
239	0.554688	0.328125	0.09375	0.015625	0.0078125
240	0.519737	0.315789	0.131579	0.0328947	0
241	0.458065	0.4	0.0709677	0.0516129	0.0193548
242	0.481481	0.398148	0.0648148	0.0462963	0.00925926
243	0.67033	0.252747	0.0659341	0.010989	0
244	0.442708	0.416667	0.104167	0.03125	0.00520833
245	0.6	0.32	0.08	0	0
246	0.568421	0.326316	0.0947368	0.0105263	0
247	0.448	0.4	0.12	0.024	0.008
248	0.414894	0.409574	0.106383	0.0531915	0.0159574
249	0.642857	0.241071	0.0625	0.0446429	0.00892857
250	0.512	0.368	0.08	0.04	0
251	0.567376	0.35461	0.0425532	0.0212766	0.0141844
252	0.390135	0.434978	0.107623	0.044843	0.0224215
253	0.457447	0.393617	0.106383	0.0425532	0
254	0.517647	0.317647	0.117647	0.0470588	0
255	0.590909	0.318182	0.0568182	0.0340909	0
256	0.462264	0.415094	0.0566038	0.0660377	0
257	0.535211	0.366197	0.084507	0.0140845	0
258	0.568182	0.272727	0.113636	0.0340909	0.0113636
259	0.685393	0.213483	0.0898876	0.011236	0
260	0.615385	0.292308	0.0615385	0.0307692	0
261	0.603175	0.206349	0.142857	0.047619	0
262	0.45	0.421429	0.1	0.0142857	0.0142857
263	0.443396	0.410377	0.108491	0.0283019	0.00943396
264	0.509804	0.333333	0.127451	0.0294118	0
265	0.514563	0.359223	0.106796	0.00970874	0.00970874
266	0.534653	0.306931	0.108911	0.039604	0.00990099
267	0.587302	0.301587	0.0793651	0.031746	0
268	0.677778	0.233333	0.0777778	0.0111111	0
269	0.464646	0.368687	0.121212	0.030303	0.0151515
270	0.527778	0.398148	0.0555556	0.0185185	0
271	0.516129	0.408602	0.0537634	0.0215054	0
272	0.533981	0.378641	0.0776699	0.00970874	0
273	0.540984	0.377049	0.0655738	0.0163934	0
274	0.515152	0.393939	0.0505051	0.020202	0.020202
275	0.47541	0.42623	0.0819672	0.0163934	0
276	0.585714	0.271429	0.114286	0.0142857	0.0142857
277	0.522727	0.401515	0.0454545	0.030303	0
278	0.477064	0.385321	0.119266	0.00917431	0.00917431
279	0.569767	0.337209	0.0813953	0.0116279	0
280	0.582278	0.316456	0.0822785	0.00632911	0.0126582
281	0.474747	0.373737	0.0707071	0.0505051	0.030303
282	0.634921	0.253968	0.0952381	0.015873	0
283	0.537736	0.330189	0.103774	0.0188679	0.00943396

## Sheet: Fig 5F
Figure 5F -In Silico - Interburst Interval Distribution
	Fraction IBIs
IBI (ms)	1	2	3	4	5	6	7	8	9	10	11	12	13	14	15	16	17	18	19	20	21	22	23	24	25	26	27	28	29	30	31	32	33	34	35	36	37	38	39	40	41	42	43	44	45	46	47	48	49
100	0.0138889	0.004329	0	0	0	0	0.0083682	0	0	0	0	0.0133333	0	0	0	0	0.016	0	0	0	0.0191388	0	0	0	0	0	0.00534759	0	0	0.00699301	0	0.00671141	0	0	0.0173913	0	0	0.00490196	0.01	0.00537634	0	0	0	0	0	0.00393701	0.00862069	0.00520833	0.0144928
200	0.0208333	0.034632	0.0253165	0.0238095	0.0133333	0	0.0376569	0.0104167	0.039604	0.0234375	0.0193548	0.0133333	0	0.0674157	0.0449438	0	0.048	0	0.0135135	0	0.0239234	0.0173913	0	0.011236	0.0204082	0.00970874	0.026738	0	0.0246914	0.013986	0	0.0402685	0.00833333	0.015873	0.026087	0.00862069	0.0126582	0.0392157	0.02	0.0376344	0	0	0.0133333	0.008	0.0129032	0.023622	0.0258621	0.0364583	0.0217391
300	0.0138889	0.025974	0	0	0.0133333	0.016129	0.0502092	0.0208333	0.019802	0.0234375	0.0258065	0.0266667	0.0120482	0	0	0	0.036	0.0133333	0.0135135	0	0.0239234	0.0173913	0.010989	0	0.0204082	0.0291262	0.026738	0.00943396	0.0246914	0.048951	0.015873	0.00671141	0.0333333	0	0.00869565	0.00862069	0.0126582	0.0294118	0.02	0.00537634	0	0	0.0133333	0.008	0.00645161	0.0433071	0.00862069	0.0364583	0.0398551
400	0.0138889	0.034632	0	0.0238095	0.0133333	0.0322581	0.0292887	0	0	0.015625	0	0	0	0.011236	0.011236	0	0.028	0.0133333	0	0.0246914	0.0382775	0.0434783	0	0.0449438	0.0544218	0.00970874	0.0534759	0.00943396	0.0308642	0.020979	0.047619	0.0201342	0	0	0.0173913	0.0344828	0.0126582	0.0245098	0.01	0.0376344	0.0135135	0	0	0.008	0.0387097	0.0314961	0.0172414	0.015625	0.0398551
500	0.0347222	0.021645	0	0.0238095	0	0	0.0167364	0.0208333	0	0.046875	0.0322581	0.0266667	0.0120482	0.011236	0.011236	0.0153846	0.08	0	0	0.0246914	0.0478469	0.0434783	0.010989	0.011236	0.0272109	0.0291262	0.0213904	0.0188679	0.0185185	0.00699301	0	0.0268456	0.0333333	0	0.0173913	0	0	0.0196078	0.02	0.00537634	0.0135135	0	0.0133333	0.04	0.0129032	0.0314961	0.0344828	0.0208333	0.0471014
600	0.00694444	0.012987	0.0126582	0.0357143	0.0266667	0	0.0334728	0.0208333	0.029703	0.0078125	0.0129032	0.0133333	0.0240964	0.011236	0.0224719	0	0.02	0.0133333	0	0	0.0430622	0.026087	0	0	0.0272109	0.0194175	0.0427807	0.0188679	0.0308642	0.013986	0	0.0134228	0.025	0.015873	0	0	0.0126582	0.0392157	0.01	0.0376344	0.0135135	0.015873	0	0.016	0.0387097	0.0354331	0.0172414	0.0260417	0.0507246
700	0.0138889	0.025974	0	0	0	0.0322581	0.0460251	0	0.029703	0.0234375	0.0387097	0.0266667	0.0120482	0	0.0224719	0.0153846	0.036	0.0133333	0	0.037037	0.0143541	0.0173913	0.010989	0.011236	0.0204082	0.0485437	0.0320856	0.0188679	0.0308642	0.027972	0	0.0134228	0.0333333	0.047619	0.0347826	0.0172414	0	0.0294118	0.02	0.0322581	0.0135135	0.047619	0.0533333	0	0.0193548	0.0354331	0.00862069	0.015625	0.0362319
800	0.00694444	0.04329	0.0253165	0	0	0	0.0167364	0.0104167	0	0.0234375	0.0387097	0.0266667	0.0120482	0.0337079	0.011236	0	0.032	0.0266667	0.0135135	0.0123457	0.0191388	0	0.032967	0	0.0340136	0.0194175	0.0374332	0	0.0246914	0.013986	0	0.033557	0.0166667	0	0	0.00862069	0.0126582	0.0294118	0.01	0.0430108	0.0135135	0	0.0666667	0.024	0.0516129	0.023622	0.00862069	0.0625	0.0289855
900	0.0277778	0.04329	0.0126582	0.0238095	0.0266667	0	0.0292887	0.0208333	0	0.015625	0.0387097	0.0133333	0.0120482	0	0	0	0.036	0	0.0135135	0.037037	0.0334928	0.0173913	0	0.0224719	0.0272109	0	0.026738	0	0.0432099	0.020979	0.031746	0.0201342	0.025	0	0.00869565	0.0258621	0.0253165	0.0343137	0.01	0.0215054	0.027027	0	0.0133333	0.024	0.0129032	0.0275591	0.00862069	0.0104167	0.0326087
1000	0.00694444	0.030303	0.0379747	0.0119048	0.0133333	0.016129	0.0251046	0.0208333	0.00990099	0.0078125	0.0193548	0.0266667	0.0240964	0	0.011236	0	0.02	0	0	0.037037	0.0239234	0.00869565	0.021978	0.011236	0.0272109	0.038835	0.0160428	0.0377358	0.0246914	0.034965	0.015873	0.033557	0.05	0.015873	0.00869565	0.00862069	0	0.0196078	0.02	0.00537634	0	0.015873	0.04	0.016	0.0258065	0.0433071	0.00862069	0.0260417	0.0181159
1100	0.0347222	0.04329	0	0.0238095	0	0	0.0376569	0.0208333	0	0.0078125	0.00645161	0.0133333	0.0120482	0.0224719	0	0.0461538	0.028	0.04	0.027027	0.0246914	0.0478469	0.0173913	0	0.011236	0	0	0.0427807	0.0283019	0.0123457	0.013986	0	0.0201342	0	0.031746	0.0173913	0.00862069	0	0.0245098	0	0.0215054	0	0.015873	0.0133333	0	0.0193548	0.019685	0	0.03125	0.0326087
1200	0.0208333	0.012987	0	0.0238095	0.0133333	0.016129	0.0334728	0.0104167	0.00990099	0.03125	0.0129032	0.0133333	0.0240964	0.011236	0.0224719	0.0153846	0.028	0	0	0.037037	0.0239234	0.0173913	0.010989	0.0224719	0.0204082	0.00970874	0.0160428	0.0188679	0.0185185	0.013986	0.031746	0.0134228	0.025	0.015873	0.00869565	0.0172414	0.0253165	0.0245098	0	0.0107527	0.0135135	0.015873	0	0.008	0.00645161	0.023622	0	0.03125	0.0326087
1300	0.0208333	0.04329	0.0126582	0.0119048	0.0133333	0	0.0209205	0.0208333	0.029703	0	0.0129032	0	0.0120482	0.011236	0	0.0307692	0.036	0	0.0135135	0	0.0239234	0	0.021978	0	0.0272109	0.00970874	0.0160428	0	0.0123457	0.013986	0	0.00671141	0	0.015873	0.00869565	0.00862069	0.0126582	0.0245098	0	0.016129	0.0135135	0	0.0266667	0.024	0.0129032	0.0354331	0.0172414	0.0260417	0.0217391
1400	0.0277778	0.021645	0.0253165	0.0119048	0.0266667	0.016129	0.0167364	0.0208333	0.029703	0.0234375	0.0322581	0	0	0.0337079	0.011236	0	0.04	0	0	0.0123457	0.0191388	0.00869565	0	0.011236	0.0136054	0.0194175	0.0320856	0	0.037037	0.034965	0	0.00671141	0.0166667	0	0.0347826	0.0172414	0.0126582	0.0147059	0.01	0.0322581	0	0.015873	0.0266667	0.024	0.0387097	0.023622	0.00862069	0.0208333	0.0434783
1500	0.0347222	0.025974	0.0126582	0	0	0	0.0083682	0.0104167	0.019802	0.03125	0.00645161	0.0133333	0	0	0.0224719	0.0153846	0.02	0	0.027027	0	0.0143541	0.0347826	0.032967	0	0	0.0194175	0.0213904	0	0.0308642	0.00699301	0	0.0134228	0.0166667	0.015873	0.0347826	0.0431034	0.0126582	0.0147059	0	0.0215054	0.0135135	0.031746	0.0133333	0.032	0.00645161	0.0354331	0.00862069	0.015625	0.0253623
1600	0.0347222	0.012987	0.0126582	0.0357143	0.0266667	0.016129	0.0251046	0	0.00990099	0.0078125	0.0193548	0	0.0361446	0	0.0337079	0	0.024	0	0.027027	0	0	0.0173913	0.021978	0.011236	0.0272109	0.00970874	0.0160428	0.00943396	0.0185185	0.020979	0	0.0201342	0.0166667	0.015873	0.0173913	0.0517241	0.0126582	0.0196078	0.01	0.0322581	0.0135135	0.015873	0.0133333	0.024	0.00645161	0.0354331	0	0.015625	0.0398551
1700	0.00694444	0.012987	0.0126582	0	0.0133333	0	0.0167364	0.0208333	0.019802	0.015625	0.00645161	0.0266667	0.0120482	0.011236	0	0.0153846	0.024	0.0133333	0	0.0123457	0.0191388	0.0173913	0.032967	0.011236	0.0272109	0	0.0160428	0.0377358	0.0185185	0.034965	0	0.00671141	0	0.031746	0.0173913	0.00862069	0.0126582	0.00980392	0.01	0.016129	0	0	0.0133333	0.04	0.0322581	0.023622	0.00862069	0.0260417	0.0108696
1800	0.0138889	0.030303	0.0126582	0.0119048	0	0.0322581	0.0083682	0.0208333	0	0.015625	0.0129032	0.0133333	0	0	0	0	0.012	0	0	0	0.0143541	0.00869565	0.021978	0	0	0.00970874	0.00534759	0.0188679	0.0185185	0.020979	0.015873	0.033557	0.00833333	0	0	0.0258621	0	0.0196078	0.01	0.0268817	0.0135135	0.015873	0	0.016	0.0258065	0.015748	0	0.015625	0.0181159
1900	0.0138889	0.012987	0.0253165	0.0119048	0.0133333	0.0322581	0.0251046	0	0	0.0078125	0.0129032	0	0.0240964	0.011236	0	0	0.012	0	0	0	0.00478469	0.00869565	0.032967	0.011236	0	0.0194175	0.0213904	0.00943396	0.0185185	0.00699301	0	0.0469799	0.00833333	0	0.026087	0.0258621	0.0126582	0.0245098	0.01	0.0107527	0	0.015873	0.0133333	0.016	0.0129032	0.023622	0.0258621	0.0260417	0.0181159
2000	0.0208333	0.04329	0.0253165	0.0119048	0	0	0.0251046	0.0104167	0.049505	0	0.0193548	0.0266667	0	0.0224719	0.011236	0	0.012	0	0	0	0.00956938	0.0173913	0	0	0.00680272	0.0194175	0.00534759	0.0188679	0	0.00699301	0.015873	0.0134228	0.00833333	0	0.00869565	0.0172414	0.0126582	0.0196078	0.01	0.0215054	0.027027	0.015873	0	0.024	0.0193548	0.0314961	0.00862069	0.046875	0.0326087
2100	0.0138889	0.025974	0.0253165	0.0119048	0	0.0322581	0.0502092	0.0104167	0.00990099	0.0234375	0.0322581	0	0.0120482	0	0	0	0.028	0.0133333	0.0135135	0	0.0191388	0.00869565	0.010989	0	0.00680272	0.0194175	0.026738	0.0188679	0	0	0.015873	0.00671141	0	0	0.00869565	0.00862069	0.0126582	0.0294118	0.01	0.0215054	0	0	0	0.008	0	0.0354331	0.0344828	0.0104167	0.0144928
2200	0.0138889	0.012987	0	0.0238095	0.0266667	0	0.0209205	0	0.019802	0.0234375	0.0322581	0	0.0120482	0.011236	0	0	0.008	0	0	0.0123457	0.00956938	0.00869565	0.010989	0.0224719	0.00680272	0	0.00534759	0	0	0.020979	0	0.0201342	0.0166667	0.047619	0.00869565	0.00862069	0.0126582	0.0441176	0.02	0.00537634	0.0135135	0.015873	0.0133333	0	0.0258065	0.00393701	0.0172414	0.0104167	0.0217391
2300	0.0625	0.021645	0.0253165	0.0119048	0	0	0.0251046	0.0104167	0.00990099	0.0078125	0.0129032	0.0266667	0.0120482	0	0.011236	0	0.016	0.0266667	0.0135135	0	0.0143541	0	0.021978	0.011236	0.0136054	0	0.0160428	0.0377358	0.0123457	0.00699301	0	0.0201342	0	0.015873	0.026087	0	0	0.0245098	0.01	0.0107527	0.0135135	0.031746	0.0133333	0.016	0	0.019685	0.00862069	0.015625	0.0144928
2400	0.0277778	0	0	0	0	0.016129	0.0125523	0.0104167	0.019802	0.015625	0.00645161	0.0133333	0.0120482	0	0.0224719	0.0153846	0.024	0	0	0	0.00478469	0	0.021978	0.011236	0.0204082	0	0.0106952	0.00943396	0.0123457	0.013986	0	0.0134228	0.00833333	0	0.0347826	0.0258621	0.0126582	0.0147059	0.02	0.016129	0	0.015873	0	0.016	0.0129032	0.023622	0.0172414	0.0104167	0.0144928
2500	0.00694444	0.021645	0	0.0119048	0	0	0.0209205	0.0104167	0.029703	0.015625	0	0.0133333	0	0.011236	0.011236	0.0153846	0.012	0.0133333	0	0	0.0191388	0.026087	0	0.0224719	0.0340136	0.0194175	0.0106952	0.0188679	0	0.00699301	0.015873	0.0134228	0.00833333	0	0.00869565	0.0172414	0.0126582	0.0245098	0.05	0.0268817	0.0135135	0.015873	0.0133333	0.016	0.0129032	0.0314961	0	0.015625	0.0326087
2600	0.00694444	0.012987	0	0	0	0.016129	0.0125523	0.0104167	0	0.0234375	0.0193548	0	0.0361446	0	0.011236	0.0153846	0.016	0.0133333	0	0.0123457	0.0143541	0.026087	0.021978	0	0	0	0.0106952	0.00943396	0.00617284	0.00699301	0.015873	0.0134228	0.0166667	0	0.00869565	0	0.0126582	0.00980392	0.02	0.0215054	0.0135135	0	0	0	0.0129032	0.011811	0.0344828	0.0208333	0.00724638
2700	0	0.017316	0	0	0	0	0.0083682	0.0416667	0	0.0078125	0.0129032	0.0133333	0	0	0	0.0153846	0.016	0.0266667	0.027027	0.0123457	0.0287081	0.0173913	0.010989	0.011236	0.0136054	0.0194175	0.0106952	0.00943396	0.00617284	0.020979	0.015873	0.0134228	0.0333333	0.031746	0.026087	0.0172414	0	0.0147059	0.02	0.0107527	0.0135135	0	0.0133333	0.024	0.00645161	0.00787402	0.0172414	0.0208333	0.00724638
2800	0.0208333	0.021645	0.0126582	0.0119048	0.0133333	0	0.0167364	0.0104167	0.00990099	0.015625	0.0258065	0	0.0120482	0.0224719	0.0449438	0	0.008	0	0.027027	0	0.00956938	0.0173913	0.010989	0.011236	0	0	0.0106952	0	0.0185185	0.020979	0.015873	0.0134228	0.00833333	0.031746	0.0173913	0.00862069	0.0126582	0.00980392	0.02	0.0322581	0	0.015873	0	0.024	0	0.015748	0	0.00520833	0.0217391
2900	0.00694444	0.00865801	0	0	0	0.016129	0.0209205	0	0.00990099	0.0078125	0.0193548	0.0133333	0.0240964	0	0	0	0.004	0.0133333	0	0.0246914	0.00956938	0	0.010989	0.0224719	0.00680272	0.00970874	0.0106952	0.00943396	0.0246914	0.00699301	0	0.00671141	0.00833333	0	0	0.00862069	0.0126582	0.00490196	0.02	0.0107527	0	0	0	0.008	0.0258065	0.019685	0.0172414	0.0104167	0.0108696
3000	0	0.017316	0.0126582	0	0	0.016129	0.0125523	0.03125	0.00990099	0.0234375	0	0.0133333	0.0120482	0.011236	0.011236	0.0153846	0.016	0	0	0.0246914	0.0191388	0.0173913	0.010989	0.011236	0.00680272	0	0.0160428	0.00943396	0.0123457	0.034965	0.031746	0.00671141	0.0166667	0.015873	0.00869565	0	0	0.0245098	0.01	0.0268817	0	0.031746	0.0133333	0	0.0193548	0.0314961	0	0.00520833	0.0217391
3100	0	0.004329	0	0.0238095	0.0266667	0.016129	0.0041841	0	0	0.0078125	0.0129032	0	0.0240964	0	0.0224719	0	0.004	0.0133333	0.0135135	0.0123457	0.0191388	0.00869565	0	0.0224719	0.00680272	0.00970874	0.0160428	0.00943396	0.0308642	0.020979	0	0.00671141	0.00833333	0	0.00869565	0	0.0126582	0.0147059	0.02	0.016129	0.027027	0.031746	0	0.024	0.00645161	0.00787402	0.0172414	0.0208333	0.00724638
3200	0	0.004329	0	0.0119048	0	0	0.0209205	0.0104167	0.00990099	0.0078125	0	0.0266667	0.0120482	0.0224719	0	0.0153846	0.008	0.0266667	0.0135135	0.0123457	0.00956938	0.00869565	0.021978	0.0224719	0.0136054	0.0194175	0.0213904	0.00943396	0.00617284	0.00699301	0	0.0134228	0.0166667	0	0.0173913	0.0258621	0.0253165	0.00980392	0.03	0.016129	0	0	0.0133333	0.008	0.0258065	0.011811	0.00862069	0.00520833	0.0144928
3300	0.00694444	0.021645	0.0126582	0	0.0133333	0	0.0083682	0	0.019802	0	0	0.0133333	0.0240964	0.011236	0.0337079	0	0.016	0.0266667	0	0.0123457	0.0191388	0.00869565	0.032967	0.011236	0.00680272	0.0194175	0.0160428	0	0.00617284	0.020979	0.031746	0.00671141	0.0166667	0.015873	0	0.0172414	0.0253165	0.0196078	0.02	0.00537634	0	0	0.0133333	0.032	0.0193548	0.00787402	0.0258621	0	0.00724638
3400	0.00694444	0.021645	0.0253165	0	0	0	0.0083682	0.0104167	0.00990099	0.0078125	0.0129032	0.0133333	0	0.0224719	0	0.0153846	0.012	0.0133333	0.027027	0	0.0287081	0	0.010989	0.011236	0.0544218	0.00970874	0.0160428	0.00943396	0.0123457	0.00699301	0	0.00671141	0.025	0	0.00869565	0.0172414	0.0253165	0.00490196	0	0.0215054	0.027027	0	0	0	0.00645161	0.00393701	0.00862069	0.0260417	0.0108696
3500	0.0138889	0.004329	0	0	0.0266667	0.016129	0.0041841	0	0.00990099	0	0.0129032	0	0	0.011236	0.011236	0	0.008	0	0	0	0.0143541	0.00869565	0.021978	0.0337079	0.00680272	0.0194175	0.00534759	0.0188679	0.00617284	0.013986	0	0.0134228	0.0333333	0.015873	0.0173913	0	0.0253165	0.00980392	0.02	0.0107527	0.0135135	0.015873	0	0.016	0.0129032	0.00787402	0.0172414	0	0.00362319
3600	0.0138889	0.012987	0.0253165	0	0.0133333	0.016129	0.0167364	0	0.00990099	0.015625	0.0193548	0.0266667	0	0	0.0337079	0	0	0	0	0	0.00478469	0	0	0	0.00680272	0.0194175	0.0213904	0	0.00617284	0.013986	0.015873	0.0134228	0.00833333	0	0.00869565	0	0.0253165	0	0	0.00537634	0	0	0.0133333	0.008	0.0193548	0.00393701	0.0258621	0	0.0181159
3700	0	0.017316	0.0126582	0	0.0266667	0	0.0041841	0	0.019802	0.0234375	0.0129032	0	0.0120482	0	0	0.0307692	0.016	0	0	0	0	0.026087	0.010989	0.011236	0.0272109	0.00970874	0.0160428	0.00943396	0.0185185	0.00699301	0	0.0201342	0.00833333	0.015873	0.00869565	0.0172414	0.0126582	0	0.01	0.0268817	0	0.015873	0.0133333	0	0	0.00393701	0	0.0104167	0.0144928
3800	0.00694444	0.00865801	0.0253165	0	0.0133333	0.0322581	0.0041841	0	0	0	0	0	0	0	0	0.0153846	0.004	0.0133333	0.0135135	0	0.0191388	0.00869565	0.010989	0.011236	0.0204082	0.00970874	0.0106952	0	0.00617284	0	0	0.00671141	0.0333333	0	0.00869565	0	0.0126582	0.0196078	0.01	0.0107527	0.0135135	0	0.0133333	0	0.0129032	0.00393701	0	0.00520833	0.00362319
3900	0	0.004329	0	0.0238095	0	0	0.0125523	0.0208333	0.019802	0.015625	0.00645161	0	0.0120482	0.011236	0.011236	0.0153846	0.008	0.0133333	0	0.0246914	0.00478469	0.00869565	0	0.0337079	0.0136054	0	0.00534759	0	0.00617284	0.00699301	0	0	0	0	0	0.00862069	0.0126582	0.0147059	0	0.0107527	0.0135135	0	0	0.008	0.0129032	0.015748	0.0172414	0.0104167	0.00724638
4000	0.0208333	0.00865801	0.0253165	0	0.0133333	0	0.0041841	0.0104167	0.019802	0	0.00645161	0	0.0120482	0.011236	0	0	0.008	0.0133333	0	0.0123457	0.0191388	0.0173913	0.010989	0.0224719	0.00680272	0	0	0.00943396	0.00617284	0.00699301	0	0.00671141	0.0166667	0.015873	0.00869565	0.00862069	0.0126582	0.00980392	0	0.0107527	0.0405405	0	0	0.024	0.0129032	0.00787402	0	0.00520833	0.0217391
4100	0.0208333	0.012987	0	0.0238095	0.0133333	0	0.0125523	0.0104167	0	0.0078125	0.0129032	0.0133333	0	0	0.011236	0	0	0.0133333	0	0	0.00956938	0.00869565	0	0	0.0136054	0	0.0106952	0.00943396	0.00617284	0.020979	0	0.0134228	0.00833333	0	0.026087	0.0431034	0	0.00980392	0	0.00537634	0	0	0.0133333	0.008	0.0129032	0.00393701	0.0172414	0	0
4200	0	0.004329	0	0.0119048	0	0	0	0.0208333	0.00990099	0.0078125	0	0.0133333	0.0120482	0	0	0	0	0	0	0	0.0239234	0	0	0.011236	0.00680272	0.00970874	0.00534759	0	0.0185185	0.00699301	0	0.0134228	0	0.015873	0.0347826	0.00862069	0	0.00980392	0.03	0	0	0	0.0133333	0	0.00645161	0	0.0172414	0.00520833	0
4300	0	0	0.0126582	0	0.0133333	0	0.0083682	0	0	0.0078125	0.00645161	0.0133333	0	0	0	0	0.02	0.0133333	0.0135135	0.0123457	0.00956938	0.026087	0.021978	0	0.00680272	0.00970874	0.0106952	0	0.00617284	0	0.031746	0.0134228	0.00833333	0	0.00869565	0.00862069	0.0126582	0.00490196	0	0.00537634	0.0135135	0	0.0133333	0	0	0.00787402	0.0172414	0	0
4400	0	0.00865801	0	0	0	0.0322581	0	0.0208333	0.00990099	0.0078125	0.00645161	0	0	0	0.011236	0.0153846	0.004	0.0266667	0.027027	0.0123457	0	0.00869565	0	0	0.0204082	0.00970874	0.00534759	0.0283019	0.00617284	0	0	0.00671141	0.025	0	0.026087	0.00862069	0	0	0	0.0107527	0.0135135	0.015873	0.0133333	0	0.0193548	0	0	0.015625	0.00362319
4500	0	0.004329	0.0379747	0	0	0	0.0041841	0.0104167	0.00990099	0.0078125	0.00645161	0	0.0120482	0	0	0	0.012	0	0.0135135	0	0.00956938	0.00869565	0	0.011236	0.0136054	0	0.00534759	0	0.0185185	0	0	0.0201342	0	0	0	0.0172414	0.0126582	0	0	0.0107527	0.0135135	0.015873	0	0.016	0.0322581	0.00393701	0.0172414	0	0.00724638
4600	0.0138889	0.00865801	0	0	0.0133333	0	0.0125523	0.0104167	0.00990099	0.0078125	0.0129032	0.0133333	0.0240964	0	0	0	0.008	0	0	0	0.00956938	0.00869565	0.010989	0.011236	0.0136054	0	0.0106952	0.00943396	0	0.00699301	0	0.0134228	0	0	0.00869565	0	0	0	0.01	0.0107527	0	0	0.0133333	0.016	0.0129032	0	0	0	0.00362319
4700	0	0	0	0	0	0	0.0209205	0.0104167	0	0.03125	0	0.0133333	0	0.011236	0.011236	0	0.004	0	0.0135135	0	0.00956938	0	0	0	0.0136054	0	0.0106952	0.00943396	0.0308642	0.00699301	0	0.00671141	0.00833333	0	0	0	0	0	0	0	0.0135135	0	0	0	0.00645161	0	0.00862069	0.015625	0.00362319
4800	0.00694444	0	0	0.0238095	0	0	0.0167364	0	0.00990099	0	0.00645161	0.0133333	0	0.011236	0.011236	0	0.004	0.0133333	0	0.0123457	0.00956938	0	0	0	0	0.0194175	0.00534759	0.00943396	0.00617284	0.013986	0.015873	0.0134228	0.00833333	0	0	0.00862069	0.0126582	0.00490196	0	0.00537634	0.0405405	0	0	0	0	0.011811	0.00862069	0.0104167	0
4900	0	0.004329	0.0126582	0.0119048	0	0	0	0.0208333	0.019802	0	0.00645161	0.0266667	0	0	0.0224719	0	0.004	0	0	0	0.00478469	0.00869565	0.010989	0.011236	0	0.00970874	0	0.0188679	0.0123457	0	0	0.0134228	0	0	0	0.00862069	0.0126582	0.00490196	0.01	0.00537634	0.0135135	0.015873	0	0.008	0	0.00393701	0.0172414	0.0104167	0.00362319
5000	0.0138889	0	0.0126582	0	0.04	0	0.0041841	0	0.00990099	0.0078125	0.0129032	0	0.0240964	0	0	0.0153846	0.004	0.0133333	0	0	0.0143541	0	0.021978	0	0	0.00970874	0.00534759	0	0.00617284	0	0	0.0201342	0.00833333	0.015873	0	0.00862069	0	0.0147059	0.01	0.016129	0	0	0	0.008	0.00645161	0.00393701	0.00862069	0.0104167	0
5100	0.0138889	0.00865801	0.0126582	0	0.0133333	0	0.0041841	0.0104167	0	0.0078125	0.00645161	0	0	0.011236	0	0.0153846	0	0.0266667	0	0.0123457	0	0.00869565	0.010989	0.0224719	0	0.00970874	0.0106952	0.00943396	0.0123457	0.013986	0.031746	0	0.00833333	0	0.00869565	0.00862069	0	0.00980392	0	0.00537634	0	0	0	0	0	0.015748	0	0.00520833	0.0108696
5200	0.00694444	0.004329	0	0	0.0133333	0	0.0041841	0.0104167	0.019802	0.0078125	0.00645161	0	0.0120482	0.011236	0	0.0153846	0	0	0.0135135	0.0246914	0.0143541	0.00869565	0	0.011236	0	0.0194175	0.00534759	0.0188679	0.00617284	0.00699301	0.015873	0.0134228	0.025	0	0	0.00862069	0	0.00980392	0	0.016129	0.0135135	0	0.0133333	0	0.00645161	0.00787402	0.00862069	0.0104167	0.00362319
5300	0.00694444	0.004329	0.0253165	0	0.0133333	0	0.0041841	0.0104167	0	0.0078125	0.0387097	0	0.0120482	0	0.0224719	0	0.004	0	0.0135135	0.0246914	0.00478469	0.00869565	0	0.0224719	0.0136054	0.00970874	0	0	0.0185185	0.00699301	0.015873	0	0	0	0.0173913	0	0	0.00980392	0	0.00537634	0.0135135	0	0	0.008	0.00645161	0.00393701	0.0258621	0.0104167	0.00362319
5400	0.0138889	0	0	0.0357143	0.0133333	0.016129	0.0125523	0.0104167	0	0.0078125	0.0129032	0	0	0.011236	0.011236	0	0	0.0133333	0.0405405	0.0123457	0.00478469	0.00869565	0	0	0.00680272	0	0	0.00943396	0.00617284	0	0	0.00671141	0.0166667	0.031746	0.00869565	0.00862069	0	0.00490196	0.02	0.00537634	0	0.015873	0	0	0	0	0.00862069	0.00520833	0.00362319
5500	0.0138889	0.004329	0	0.0119048	0.0133333	0	0.0041841	0	0	0.015625	0.0258065	0	0.0120482	0	0	0	0.004	0.0133333	0.0135135	0	0.00956938	0.00869565	0	0	0	0.00970874	0.00534759	0.00943396	0.00617284	0.00699301	0.015873	0	0	0.015873	0.00869565	0	0	0	0.01	0	0.0135135	0	0	0	0.00645161	0.00787402	0.0172414	0.0104167	0
5600	0	0	0.0126582	0	0	0	0.0083682	0	0	0	0.00645161	0	0	0.0449438	0	0	0.008	0	0.0135135	0	0.00956938	0	0	0	0.00680272	0	0	0	0.0185185	0	0	0	0	0	0	0	0	0.00490196	0.01	0.00537634	0	0	0.0266667	0	0.0129032	0	0	0.00520833	0
5700	0	0.00865801	0.0126582	0	0	0	0.0041841	0	0.00990099	0.0078125	0.00645161	0	0	0.0224719	0	0.0153846	0	0	0	0.0123457	0	0.00869565	0	0	0.0136054	0	0.0160428	0	0	0.00699301	0	0.00671141	0.0166667	0	0.00869565	0.0258621	0	0.00980392	0.02	0.00537634	0	0	0	0	0.00645161	0.00393701	0	0	0.00362319
5800	0.0208333	0.00865801	0	0	0	0	0.0041841	0.0104167	0	0.0078125	0	0	0	0.011236	0.0224719	0.0153846	0.012	0	0.0135135	0	0.00478469	0	0	0	0.00680272	0	0.00534759	0	0.00617284	0	0	0.00671141	0	0	0	0.00862069	0.0126582	0.00980392	0	0	0	0	0	0	0	0.00393701	0.00862069	0.00520833	0.00724638
5900	0.00694444	0.00865801	0	0	0.0133333	0	0.0041841	0	0	0	0.0193548	0.0133333	0.0120482	0	0.011236	0	0	0	0	0	0	0	0	0	0	0	0.00534759	0.0283019	0	0.013986	0.015873	0	0	0.015873	0	0	0.0126582	0.00980392	0.01	0	0	0	0	0.008	0	0	0	0	0.00362319
6000	0.00694444	0.004329	0	0	0	0.016129	0.0041841	0.0104167	0	0	0	0	0.0120482	0.011236	0	0	0.004	0.0133333	0	0	0.00478469	0	0	0.0224719	0	0	0	0	0.00617284	0	0	0.00671141	0	0	0	0	0	0.00980392	0.02	0	0.0135135	0	0.0133333	0.008	0.0129032	0.00393701	0.0344828	0.0104167	0.00362319
6100	0.00694444	0.004329	0	0	0	0.0322581	0.0041841	0.0104167	0	0.015625	0.00645161	0	0	0.0224719	0	0.0153846	0.004	0	0	0.0123457	0	0.0173913	0	0	0.00680272	0	0.00534759	0.0188679	0	0.00699301	0	0	0	0	0.00869565	0.00862069	0	0.00490196	0.01	0	0	0.015873	0.0133333	0	0.00645161	0.011811	0	0.00520833	0.00362319
6200	0.00694444	0	0.0126582	0	0	0.016129	0.0041841	0	0	0	0.0129032	0.0133333	0	0	0.011236	0.0153846	0.004	0	0	0.0123457	0	0.00869565	0.010989	0.0224719	0.00680272	0	0.0106952	0.00943396	0.00617284	0	0	0.0134228	0	0	0.00869565	0	0	0	0	0.00537634	0	0	0	0.008	0.00645161	0.00787402	0.0172414	0.00520833	0.00362319
6300	0	0.004329	0.0253165	0	0	0	0	0.0104167	0.019802	0.0078125	0.00645161	0	0	0	0.011236	0	0	0.0133333	0.0135135	0	0.00478469	0	0.010989	0	0	0	0.00534759	0	0.00617284	0.00699301	0.015873	0	0	0	0	0.00862069	0.0126582	0.0147059	0.01	0	0.0135135	0.015873	0	0	0	0	0	0.00520833	0
6400	0.0138889	0.012987	0	0.0119048	0	0.016129	0	0	0	0.0078125	0.00645161	0.0133333	0	0.011236	0	0.0153846	0	0.0133333	0	0	0.0143541	0	0	0.011236	0.00680272	0.0194175	0	0.00943396	0	0	0	0.00671141	0.0166667	0	0	0.00862069	0	0	0	0	0.0135135	0	0.0133333	0	0	0.00393701	0.00862069	0	0.00362319
6500	0.00694444	0.00865801	0	0.0119048	0	0	0	0.0104167	0.00990099	0	0	0	0	0	0	0	0	0	0.0135135	0	0	0.00869565	0.010989	0.011236	0.0136054	0	0	0.0188679	0.00617284	0.013986	0.031746	0	0.0166667	0	0.00869565	0	0	0.00490196	0	0	0	0	0	0	0.0129032	0.00393701	0.00862069	0.00520833	0
6600	0	0.00865801	0	0.0119048	0.0266667	0	0	0	0	0	0.0129032	0	0	0.0224719	0.011236	0	0	0	0.0135135	0	0.00478469	0.00869565	0.010989	0	0.00680272	0.00970874	0	0	0.00617284	0	0	0	0.0166667	0	0.0173913	0.0172414	0	0	0	0.00537634	0.0135135	0	0	0.024	0	0.00393701	0	0.00520833	0
6700	0	0.004329	0.0253165	0	0.0133333	0	0.0041841	0	0	0.0078125	0	0.0266667	0	0	0.011236	0	0	0.0133333	0	0	0.00478469	0	0	0	0	0	0	0	0.00617284	0.020979	0.015873	0	0	0	0	0.00862069	0	0	0.01	0	0	0.015873	0	0.008	0.0129032	0	0.00862069	0.00520833	0
6800	0.0138889	0.004329	0.0126582	0.0357143	0	0	0.0125523	0	0.00990099	0.0078125	0.00645161	0	0.0120482	0.011236	0	0.0153846	0.004	0.0133333	0.0135135	0.0246914	0	0	0	0	0	0	0	0.00943396	0.00617284	0	0	0.00671141	0	0	0	0	0	0	0.01	0.00537634	0	0	0	0.016	0	0	0.00862069	0.00520833	0.00362319
6900	0.00694444	0.004329	0	0	0	0.016129	0	0	0	0.015625	0.00645161	0.0133333	0	0	0.011236	0	0.004	0.0133333	0.0135135	0	0	0	0.010989	0	0.00680272	0	0	0.0188679	0	0.00699301	0	0	0	0	0	0.00862069	0.0126582	0	0.01	0	0.0135135	0.015873	0	0	0.0193548	0	0	0	0.00724638
7000	0	0	0	0	0	0	0	0	0.029703	0	0	0	0.0240964	0.011236	0	0	0.004	0.0266667	0.027027	0.0123457	0.00478469	0.00869565	0	0	0.0136054	0.00970874	0	0.00943396	0.00617284	0	0.015873	0.00671141	0	0	0.0173913	0.00862069	0	0.00980392	0.02	0	0.0135135	0.031746	0	0	0	0.00393701	0	0.015625	0.00362319
7100	0	0.004329	0	0	0	0	0.0041841	0.0208333	0	0	0	0	0.0120482	0	0	0	0.008	0	0	0.0246914	0.00478469	0.0173913	0.021978	0	0	0	0	0.0188679	0.00617284	0	0	0	0.00833333	0	0.00869565	0.00862069	0.0126582	0.00490196	0	0.016129	0	0	0.0133333	0.008	0	0.00393701	0	0.00520833	0.00362319
7200	0	0	0	0.0119048	0.0133333	0	0	0.0104167	0	0	0	0	0.0120482	0	0	0.0153846	0	0	0	0.0246914	0	0	0	0	0	0.0194175	0.00534759	0.0188679	0.00617284	0.013986	0.015873	0.0134228	0	0.031746	0.0173913	0	0	0	0	0	0.0135135	0	0	0.008	0.00645161	0	0.0172414	0.00520833	0
7300	0	0	0	0	0.0133333	0	0	0.0104167	0	0.0078125	0.00645161	0	0	0	0	0	0.004	0.0266667	0	0	0	0.00869565	0	0	0.00680272	0	0	0.00943396	0	0.00699301	0	0.00671141	0	0	0	0.00862069	0.0126582	0	0.02	0	0	0	0.0266667	0	0	0.00393701	0	0.00520833	0
7400	0	0	0	0	0	0	0	0.0104167	0	0	0.00645161	0	0	0.011236	0.011236	0	0.004	0	0	0.0123457	0.00956938	0	0	0.011236	0	0	0	0.00943396	0.00617284	0	0.015873	0	0	0	0.00869565	0	0	0	0.02	0	0	0.015873	0	0.008	0.00645161	0	0.00862069	0	0.00362319
7500	0.0138889	0	0.0126582	0	0	0	0	0.0104167	0.00990099	0.0234375	0.00645161	0	0.0120482	0.011236	0.011236	0	0.004	0	0	0.0123457	0	0	0.010989	0	0	0	0	0	0	0.00699301	0	0.00671141	0	0	0	0	0.0126582	0	0	0	0.0135135	0	0	0.016	0	0	0.00862069	0.00520833	0
7600	0.00694444	0.004329	0.0126582	0	0	0	0	0	0.00990099	0	0	0	0	0.011236	0.0337079	0.0153846	0	0.0133333	0.027027	0	0	0	0.010989	0.0224719	0	0.00970874	0.00534759	0.0188679	0	0.00699301	0	0	0	0.015873	0	0	0	0	0	0	0	0	0	0.008	0	0	0.0172414	0	0
7700	0.00694444	0	0	0.0119048	0	0	0.0041841	0.0104167	0.00990099	0	0.00645161	0.0133333	0	0.011236	0	0	0	0	0	0	0.00478469	0	0	0	0	0	0	0.00943396	0.00617284	0.013986	0	0	0	0	0	0	0	0	0.01	0	0	0	0	0	0	0.00393701	0	0	0
7800	0.00694444	0	0	0.0238095	0	0.016129	0	0	0.00990099	0	0.00645161	0	0	0	0.011236	0	0.004	0	0.0135135	0.0123457	0	0	0.010989	0	0	0.00970874	0	0.00943396	0	0.00699301	0.015873	0	0.00833333	0	0	0.0172414	0	0	0	0.00537634	0	0	0	0.008	0	0	0	0.00520833	0
7900	0	0	0	0	0	0	0.0041841	0.0104167	0.019802	0.0078125	0.00645161	0	0	0	0.011236	0	0	0	0.0135135	0	0	0	0.010989	0.011236	0	0	0.0106952	0.00943396	0	0	0	0.00671141	0.00833333	0	0	0	0	0	0	0.0107527	0.0135135	0	0	0.008	0.00645161	0	0.00862069	0	0
8000	0.00694444	0	0	0.0119048	0.0133333	0	0	0	0	0	0	0.0133333	0.0120482	0	0	0.0153846	0	0	0	0	0	0	0.021978	0	0	0	0.0106952	0	0.00617284	0	0	0	0.0166667	0	0	0	0	0	0.01	0	0	0	0.0133333	0	0.00645161	0	0	0	0
8100	0	0.004329	0	0.0119048	0	0	0	0	0.00990099	0.0078125	0	0	0	0.011236	0	0	0	0	0.0135135	0	0.00478469	0.0173913	0.010989	0	0	0	0	0	0	0.00699301	0	0	0	0	0	0	0	0	0	0	0	0	0.04	0	0.0129032	0	0.0172414	0	0.00362319
8200	0	0.004329	0	0	0	0	0	0	0	0	0	0	0.0120482	0	0	0	0	0	0	0	0.00478469	0	0	0	0	0.0194175	0	0	0	0.013986	0.031746	0.00671141	0	0	0	0.0172414	0	0	0	0	0	0.015873	0	0.016	0	0	0	0	0
8300	0.00694444	0	0	0	0.0266667	0.016129	0	0	0	0	0.00645161	0	0	0.011236	0.011236	0	0	0.0133333	0.0135135	0	0.00478469	0.00869565	0.021978	0	0	0.0194175	0	0	0.00617284	0.00699301	0.015873	0	0.00833333	0	0	0	0.0126582	0	0.01	0	0	0	0	0	0	0	0	0.00520833	0
8400	0	0	0	0	0	0	0	0.0208333	0	0.015625	0.00645161	0	0	0	0	0	0	0	0	0	0	0	0	0	0	0	0.00534759	0	0.00617284	0	0	0.00671141	0	0.031746	0	0	0	0	0	0	0.0135135	0.031746	0	0.008	0	0	0	0	0
8500	0.00694444	0	0	0	0.0133333	0	0.0041841	0	0	0	0	0	0	0.011236	0	0	0	0.0133333	0.0135135	0	0	0.00869565	0.010989	0	0	0.0194175	0	0	0	0	0	0.00671141	0	0	0	0.00862069	0.0126582	0	0	0	0.0135135	0	0	0	0	0	0	0	0
8600	0.00694444	0	0	0	0	0	0	0.0104167	0	0	0	0	0	0.011236	0	0.0153846	0	0	0.0135135	0	0	0	0.010989	0	0.00680272	0.00970874	0	0	0	0	0	0	0	0	0.0173913	0.00862069	0.0126582	0	0.01	0	0.0135135	0	0	0.008	0.00645161	0.00787402	0	0	0
8700	0.00694444	0	0.0126582	0	0	0	0	0	0.00990099	0.015625	0.00645161	0	0	0	0	0	0.004	0.0133333	0	0	0	0.00869565	0	0	0	0	0.00534759	0	0.0123457	0.00699301	0	0	0.00833333	0	0	0	0	0	0	0.00537634	0.0135135	0	0	0	0	0.00393701	0.00862069	0.00520833	0.00362319
8800	0	0.004329	0	0	0	0.016129	0	0	0	0	0	0.0133333	0.0120482	0.0449438	0.011236	0	0	0.0133333	0	0	0	0.026087	0	0	0.00680272	0.0291262	0	0	0	0	0.015873	0	0	0.015873	0	0	0	0	0	0.00537634	0	0	0	0	0	0	0	0	0
8900	0	0	0	0.0119048	0.0133333	0	0.0041841	0	0	0	0	0.0133333	0.0120482	0	0.011236	0.0153846	0.004	0.0133333	0	0	0.00478469	0	0	0	0.00680272	0.00970874	0	0	0.00617284	0.00699301	0	0	0	0.015873	0	0.00862069	0.0126582	0	0	0	0	0	0	0	0	0	0.00862069	0	0
9000	0	0	0	0	0	0.016129	0	0	0	0	0	0.0266667	0	0	0	0.0461538	0	0	0	0	0	0	0	0	0	0	0	0	0	0.00699301	0	0.0134228	0	0	0	0	0.0126582	0	0.02	0.00537634	0	0	0.0133333	0	0	0	0	0	0
9100	0	0	0	0	0	0	0	0.0104167	0	0	0.0129032	0	0	0	0.011236	0	0	0	0.027027	0.0123457	0	0	0	0.011236	0.00680272	0	0	0	0	0	0	0	0	0	0	0.00862069	0.0126582	0	0	0	0	0	0	0.008	0	0	0	0	0
9200	0	0.004329	0	0	0	0.016129	0	0.03125	0	0	0	0	0	0	0	0	0	0.0133333	0	0	0	0	0.010989	0.011236	0	0	0	0.0188679	0	0	0	0.00671141	0	0	0.00869565	0	0	0	0.01	0	0.027027	0	0.0133333	0.008	0.0129032	0	0	0.00520833	0
9300	0	0	0	0	0	0	0	0	0	0.015625	0.00645161	0	0.0120482	0	0	0	0.004	0	0	0	0	0	0	0	0.0136054	0	0.00534759	0	0	0.00699301	0	0	0.0166667	0	0	0	0	0	0.01	0	0	0	0.0133333	0.008	0	0	0	0.0104167	0.00362319
9400	0	0	0	0	0.0133333	0	0.0041841	0	0	0	0	0.0133333	0	0	0	0	0	0	0	0	0.00956938	0	0	0	0	0.00970874	0	0.00943396	0.00617284	0	0	0	0.00833333	0	0	0	0	0	0	0.00537634	0	0	0	0.016	0.00645161	0.00393701	0.00862069	0	0
9500	0	0	0	0.0119048	0.0133333	0.016129	0	0	0	0	0.00645161	0	0.0120482	0	0	0	0	0	0	0	0	0.00869565	0	0.011236	0	0	0	0	0	0.00699301	0	0	0	0.031746	0.00869565	0	0	0.00490196	0	0	0	0	0	0.008	0.0129032	0	0.00862069	0	0.00724638
9600	0.00694444	0	0	0	0.0133333	0	0	0	0	0	0.00645161	0	0	0	0	0	0.004	0	0.0135135	0	0	0	0	0.0224719	0	0	0.00534759	0	0	0	0	0	0	0.015873	0	0	0	0	0	0.00537634	0	0.015873	0	0.008	0	0	0	0	0
9700	0	0	0.0253165	0	0	0	0	0.0104167	0	0.0078125	0	0	0	0	0.011236	0	0	0.0133333	0	0.0123457	0	0	0	0	0	0	0	0	0	0	0	0.00671141	0	0	0	0	0.0126582	0	0	0.00537634	0	0.015873	0	0.008	0	0	0	0	0
9800	0	0	0.0126582	0.0119048	0	0.016129	0	0	0	0	0	0	0.0120482	0	0	0	0	0	0	0	0	0	0.010989	0	0	0	0.0106952	0	0	0	0	0	0	0	0	0	0.0126582	0.00980392	0.01	0	0	0	0	0	0.00645161	0	0	0.00520833	0
9900	0	0	0	0	0	0.0322581	0	0	0	0.0078125	0	0	0	0	0.011236	0	0	0	0	0	0	0	0	0	0.00680272	0	0.00534759	0.0188679	0	0	0	0.00671141	0.00833333	0	0	0	0	0.00490196	0.01	0.00537634	0	0.015873	0	0	0	0	0	0.00520833	0
10000	0	0	0	0	0	0	0	0	0	0	0	0	0.0240964	0	0.011236	0	0.004	0	0	0	0	0.00869565	0	0.011236	0	0	0	0	0.00617284	0.013986	0	0	0	0	0.00869565	0.00862069	0	0	0	0	0	0	0	0	0	0	0	0	0
10100	0.0138889	0.004329	0	0	0	0	0	0	0	0.0078125	0	0	0	0	0	0	0	0	0	0	0	0	0	0.0224719	0.00680272	0.00970874	0.00534759	0	0.00617284	0	0	0	0.00833333	0	0.00869565	0	0.0126582	0	0	0	0	0	0	0	0	0	0	0	0.00362319
10200	0	0	0.0126582	0	0	0	0	0	0	0	0.00645161	0	0	0	0.011236	0	0	0.0133333	0	0	0	0.00869565	0	0	0	0.00970874	0.00534759	0	0.00617284	0	0	0	0	0	0	0.00862069	0	0	0	0	0.027027	0	0.0133333	0	0	0	0.00862069	0	0
10300	0.00694444	0.004329	0	0	0	0	0	0.0104167	0	0	0	0	0	0.011236	0	0	0.004	0	0	0.0246914	0	0	0	0	0	0.00970874	0	0.00943396	0	0	0	0	0	0.031746	0	0	0	0.00490196	0	0	0	0	0	0.008	0	0	0	0	0
10400	0	0.004329	0	0.0119048	0	0	0	0	0.00990099	0.0078125	0	0	0	0.011236	0	0	0	0.0133333	0	0	0	0	0	0	0	0.00970874	0	0	0	0	0	0	0	0	0	0	0	0	0	0.00537634	0.0135135	0	0	0	0	0	0	0	0
10500	0.00694444	0	0	0	0	0	0	0.0104167	0.00990099	0	0	0	0	0	0.011236	0.0153846	0	0	0	0	0	0	0	0.0224719	0	0.00970874	0	0.00943396	0.00617284	0	0	0	0	0	0	0	0	0	0	0	0	0	0	0	0	0	0	0.00520833	0.00362319
10600	0	0	0	0	0.0266667	0	0	0	0	0.0078125	0	0	0	0	0	0	0	0	0	0	0	0	0	0	0	0	0.00534759	0	0	0	0	0.00671141	0	0	0	0	0	0	0	0	0	0	0	0.008	0	0	0	0.00520833	0
10700	0	0	0	0	0	0	0	0	0	0.0078125	0	0	0.0120482	0	0	0.0153846	0	0	0	0	0	0	0	0	0.00680272	0	0	0.00943396	0	0	0.015873	0.00671141	0	0	0	0	0	0	0	0	0	0	0	0.008	0	0	0	0	0
10800	0	0	0	0	0.0133333	0	0	0.0104167	0	0	0	0	0	0	0	0.0153846	0	0	0	0	0	0	0	0.011236	0.00680272	0	0	0	0	0	0	0	0	0	0.00869565	0	0	0	0	0.00537634	0	0.015873	0	0.008	0	0	0	0	0
10900	0	0	0	0	0	0	0.0041841	0	0	0	0	0.0133333	0	0.011236	0	0.0153846	0	0	0	0	0	0	0	0	0	0	0.00534759	0	0	0	0	0	0	0	0	0	0	0.00490196	0	0	0	0.015873	0	0.008	0.0129032	0	0	0.00520833	0
11000	0	0	0	0.0119048	0	0.016129	0	0	0.00990099	0	0	0	0	0	0	0	0	0	0	0	0	0	0	0.011236	0	0	0	0.00943396	0	0	0.015873	0	0	0	0.0173913	0	0	0.00490196	0	0	0	0	0	0	0	0	0.00862069	0	0
11100	0	0.004329	0	0	0	0	0	0	0	0	0	0.0133333	0	0	0	0	0	0	0	0	0.00478469	0.00869565	0.010989	0	0	0	0	0	0	0	0	0	0	0	0	0	0	0	0	0	0	0	0	0.008	0	0	0	0	0
11200	0	0	0	0	0	0	0	0.0104167	0	0	0	0	0	0	0	0	0.008	0.0133333	0	0.0123457	0	0	0	0	0	0.00970874	0	0.00943396	0	0	0	0.0201342	0	0	0	0	0	0	0	0	0.0135135	0	0	0	0.00645161	0	0	0	0
11300	0.00694444	0	0	0	0	0	0	0	0	0	0	0	0	0	0	0	0.004	0	0	0.0123457	0	0.00869565	0	0.011236	0	0	0	0	0	0	0.015873	0	0	0.015873	0.0173913	0	0	0	0	0	0	0	0	0.008	0	0	0	0	0
11400	0	0	0	0	0	0	0	0	0	0	0	0	0.0120482	0	0	0	0	0	0	0	0	0	0.010989	0	0	0.00970874	0	0.00943396	0	0	0	0.00671141	0	0	0	0.00862069	0	0.00490196	0	0	0.0135135	0	0	0	0	0	0.00862069	0	0
11500	0	0.004329	0	0	0.0133333	0	0	0	0	0	0	0	0.0120482	0.011236	0	0.0153846	0.004	0	0.0135135	0	0	0.00869565	0	0.011236	0.00680272	0	0	0.00943396	0	0	0	0	0	0	0	0.00862069	0.0253165	0	0	0	0	0	0	0.008	0	0	0	0	0
11600	0	0	0	0.0119048	0	0	0	0	0.00990099	0.0078125	0	0	0	0	0	0	0	0	0.0135135	0	0	0	0	0	0.00680272	0	0.00534759	0	0	0	0	0	0	0.015873	0.00869565	0	0.0126582	0	0	0	0.0135135	0	0	0	0	0	0	0.00520833	0
11700	0	0	0.0126582	0	0	0	0	0	0.00990099	0.0078125	0	0	0	0	0	0	0	0	0	0.0123457	0	0	0	0	0	0	0.00534759	0.00943396	0	0	0	0.00671141	0	0.015873	0	0.0172414	0	0.00490196	0	0	0	0	0	0	0	0	0	0	0
11800	0	0	0	0.0119048	0	0.016129	0.0041841	0	0	0.0078125	0	0	0	0	0.011236	0	0	0	0	0	0	0	0	0	0	0	0	0	0	0	0.015873	0	0	0	0	0	0.0126582	0	0	0	0	0	0	0	0	0	0	0	0
11900	0	0	0.0126582	0	0	0	0	0	0	0.0078125	0	0	0	0.011236	0	0	0	0	0	0.0123457	0	0	0.010989	0	0.0136054	0	0	0.00943396	0	0	0	0	0.00833333	0	0	0	0	0.00490196	0	0	0	0	0	0	0.00645161	0	0	0	0
12000	0	0	0.0253165	0	0.0133333	0	0	0	0	0.0078125	0	0	0.0120482	0.011236	0	0	0	0	0	0	0	0	0	0	0	0	0	0	0.00617284	0	0	0	0.00833333	0	0	0	0	0	0	0	0	0	0	0	0	0	0	0.00520833	0
12100	0	0	0	0	0	0	0	0	0.00990099	0	0	0	0	0	0	0	0	0	0	0	0	0	0	0	0	0	0	0	0	0	0	0	0	0.015873	0.00869565	0	0	0	0	0	0	0	0	0	0	0	0	0	0
12200	0	0	0.0126582	0.0238095	0	0	0	0	0	0	0	0	0	0	0	0.0153846	0	0	0	0.0123457	0	0	0	0	0	0	0	0	0	0	0	0	0	0	0	0	0	0	0	0	0	0.015873	0.0133333	0	0	0	0	0	0
12300	0.0138889	0	0	0	0	0	0	0	0	0	0	0	0	0	0.0224719	0	0.004	0	0.0135135	0.0123457	0	0.00869565	0	0	0	0	0	0	0	0	0	0.0134228	0	0	0	0	0	0	0	0	0	0	0	0	0	0	0	0	0
12400	0	0	0	0.0119048	0.0266667	0	0	0	0	0	0	0	0	0	0	0	0	0.0133333	0	0	0	0.00869565	0.010989	0.0224719	0	0	0	0	0	0.00699301	0	0	0	0	0	0	0.0126582	0	0	0	0	0	0	0	0	0	0	0	0
12500	0	0	0	0	0	0	0	0	0.00990099	0	0	0	0	0.011236	0	0	0	0	0	0	0	0	0	0.011236	0	0.00970874	0.00534759	0	0	0	0	0	0.0166667	0	0	0	0	0	0.01	0	0.0135135	0	0	0.008	0	0	0	0	0
12600	0	0	0	0	0.0266667	0	0	0	0	0	0	0	0	0.011236	0	0	0	0.0133333	0.0135135	0	0	0	0.010989	0	0.00680272	0	0	0.00943396	0	0	0	0	0	0	0	0.00862069	0	0	0	0.0107527	0	0	0	0	0	0	0	0	0
12700	0	0	0	0	0	0	0	0.0104167	0	0	0	0	0	0	0.011236	0.0153846	0	0	0	0	0	0	0	0	0	0	0	0	0	0	0	0.00671141	0	0	0	0	0	0	0	0.00537634	0	0	0	0	0.00645161	0	0	0	0
12800	0	0	0	0.0119048	0	0	0	0	0.00990099	0	0	0	0	0	0	0	0	0	0	0.0246914	0	0	0	0	0	0	0	0	0.00617284	0	0	0	0	0	0	0	0	0	0	0	0	0.015873	0	0	0	0	0	0.00520833	0
12900	0	0	0	0	0	0	0	0	0	0	0	0	0	0	0	0	0	0	0	0	0	0	0	0	0.00680272	0	0	0	0	0	0	0	0	0	0	0	0	0	0	0	0	0	0.0133333	0	0	0.00393701	0.00862069	0	0
13000	0	0	0	0.0238095	0	0	0	0	0	0	0	0.0133333	0	0	0.011236	0	0	0	0.0135135	0	0	0.00869565	0	0	0	0.00970874	0	0	0	0	0	0	0	0	0	0	0	0	0	0	0	0	0	0	0.00645161	0	0	0	0
13100	0.00694444	0	0	0	0.0133333	0	0	0	0	0	0	0	0	0	0	0	0	0	0	0	0	0.00869565	0	0.0224719	0	0	0	0	0	0	0	0	0	0	0	0	0	0	0	0	0	0	0	0	0	0	0	0	0
13200	0	0	0	0	0	0	0	0	0	0.0078125	0.00645161	0.0133333	0	0	0	0	0	0	0	0	0	0.0173913	0	0	0	0	0	0	0	0.00699301	0	0	0	0	0	0	0	0	0	0	0	0	0	0	0	0	0	0	0
13300	0	0	0	0	0	0	0	0	0	0	0	0	0	0	0	0.0153846	0	0	0	0	0	0.00869565	0	0	0	0	0	0	0	0	0	0	0	0	0	0	0.0126582	0	0	0	0	0	0	0.008	0.00645161	0.00787402	0	0	0
13400	0.00694444	0	0	0	0.0133333	0	0	0	0.00990099	0	0	0	0	0	0	0	0	0	0	0	0	0	0	0	0	0.00970874	0.00534759	0	0	0	0	0	0	0	0	0	0	0	0	0	0	0	0	0	0	0	0.00862069	0	0
13500	0	0	0	0	0.0133333	0	0	0.0104167	0.00990099	0	0	0	0	0	0	0	0	0	0	0	0	0.00869565	0	0	0	0	0	0	0	0.013986	0	0	0	0	0	0	0.0126582	0	0	0	0	0	0	0	0	0	0.00862069	0	0
13600	0	0	0	0.0119048	0.0133333	0	0	0	0	0	0	0	0	0	0.011236	0.0153846	0	0	0.027027	0	0	0	0	0	0	0	0	0	0	0	0	0	0	0	0	0	0	0	0	0	0	0	0	0	0.00645161	0	0.00862069	0	0
13700	0	0	0	0	0	0.016129	0	0	0	0	0	0	0	0	0	0	0	0	0	0	0	0	0	0	0.00680272	0.00970874	0	0.00943396	0.00617284	0	0	0	0	0.015873	0.00869565	0	0	0	0	0	0.0135135	0	0	0.008	0	0	0	0	0
13800	0	0	0	0	0	0	0	0.0104167	0.00990099	0	0	0	0	0.0224719	0	0	0	0.0266667	0.0135135	0.0123457	0	0.00869565	0	0	0	0	0	0	0	0	0.015873	0	0	0	0	0	0	0	0	0	0	0.015873	0	0	0	0	0	0	0
13900	0	0	0	0.0119048	0	0	0	0	0	0	0	0.0133333	0	0	0	0.0153846	0	0	0.0135135	0	0	0	0	0	0	0	0	0	0	0.00699301	0	0	0	0	0.00869565	0	0	0	0.01	0	0	0.015873	0	0	0	0	0.00862069	0	0
14000	0	0	0	0	0	0	0	0	0	0	0	0	0.0120482	0.011236	0	0.0307692	0	0	0	0	0	0	0	0	0	0	0	0	0	0	0.015873	0	0	0	0	0	0.0126582	0	0	0	0	0.015873	0	0	0	0	0.00862069	0	0
14100	0.00694444	0	0	0	0	0	0	0	0	0	0.00645161	0	0	0	0	0.0153846	0	0	0	0	0	0	0	0	0	0	0	0	0	0	0	0	0	0	0	0.0172414	0	0	0.01	0	0	0	0	0	0	0	0	0	0
14200	0	0	0	0	0	0	0	0.0104167	0	0	0	0	0	0	0	0	0	0	0	0.0123457	0	0	0	0	0	0	0	0.00943396	0	0	0	0	0	0	0.00869565	0	0.0126582	0.00980392	0	0	0	0	0	0	0	0	0	0	0
14300	0	0	0	0	0	0	0	0	0	0	0	0	0	0	0	0	0	0	0.0135135	0	0	0	0	0	0	0	0	0	0	0	0	0	0	0	0	0	0	0	0	0	0.0135135	0	0	0	0	0	0	0	0
14400	0	0	0	0.0119048	0	0	0.0041841	0	0	0	0.00645161	0	0	0	0	0	0	0.0133333	0	0	0	0.00869565	0	0	0	0	0	0	0	0	0	0	0	0.015873	0	0	0	0	0	0.00537634	0	0	0	0.008	0	0	0.00862069	0	0
14500	0	0	0	0	0	0	0	0.0208333	0	0	0	0	0	0.011236	0	0.0153846	0	0	0.0135135	0	0	0	0	0	0	0	0	0	0	0	0	0.00671141	0	0	0	0	0	0	0.01	0	0	0	0	0	0	0	0	0	0
14600	0	0	0	0	0	0.016129	0	0	0.00990099	0	0	0	0.0120482	0.011236	0	0	0	0	0	0	0	0	0	0	0	0.00970874	0	0	0	0	0	0	0	0	0	0	0	0	0	0.00537634	0	0	0	0	0	0	0	0	0
14700	0	0	0	0	0	0.016129	0	0	0	0	0	0	0	0	0	0	0	0	0	0	0	0	0	0	0	0	0	0	0	0.00699301	0	0	0.00833333	0	0	0	0.0126582	0	0	0	0	0	0	0	0	0	0	0	0
14800	0	0	0.0126582	0	0	0	0	0	0.00990099	0	0	0	0	0	0	0	0	0	0	0	0	0.00869565	0	0.011236	0	0	0.00534759	0	0	0	0	0	0	0	0	0	0	0	0	0	0	0	0.0133333	0	0	0	0	0	0
14900	0	0	0.0126582	0	0	0	0	0	0	0	0	0	0	0	0	0	0	0	0	0	0	0.00869565	0	0	0	0	0	0	0	0	0	0	0	0	0	0	0	0	0	0	0	0	0	0	0	0	0	0	0
15000	0	0	0	0.0119048	0	0	0	0.0104167	0	0	0	0	0	0	0.011236	0	0	0	0	0	0	0	0	0.011236	0	0	0	0	0	0	0	0	0	0	0.00869565	0.00862069	0.0126582	0	0	0	0	0	0.0133333	0	0	0	0	0	0
15100	0	0	0	0	0	0	0	0	0.00990099	0	0	0	0	0	0	0	0	0	0	0	0	0	0	0	0	0	0	0	0	0	0	0	0	0	0	0	0	0	0	0	0	0.015873	0	0	0	0	0	0	0
15200	0.00694444	0	0	0	0	0	0	0	0	0	0.00645161	0	0.0120482	0.011236	0.011236	0	0	0	0	0	0	0	0	0	0	0	0	0	0.00617284	0	0	0	0	0	0	0	0	0	0	0	0	0	0.0133333	0	0	0	0	0	0
15300	0.00694444	0	0	0.0119048	0	0	0	0	0	0	0	0	0	0	0	0	0	0	0	0	0	0	0	0	0	0	0	0	0	0	0.015873	0	0	0	0	0	0	0	0.01	0	0	0	0.0133333	0	0	0	0	0	0
15400	0	0	0	0	0	0.016129	0	0	0	0	0	0	0	0	0	0	0	0	0	0	0	0	0	0.011236	0	0	0	0	0	0	0	0	0	0	0	0	0	0	0	0	0	0	0	0	0	0	0	0	0
15500	0	0	0	0	0	0	0	0	0.00990099	0	0	0	0	0	0	0.0153846	0	0	0.0135135	0	0	0	0	0	0	0.00970874	0	0	0	0.00699301	0.015873	0	0	0	0	0	0	0	0	0	0	0	0	0	0	0	0	0	0
15600	0	0	0	0	0	0	0	0	0	0	0	0	0.0120482	0	0	0	0	0	0	0.0123457	0	0	0	0	0	0	0	0	0	0	0	0	0	0	0	0.00862069	0	0	0	0	0	0	0	0	0	0	0	0	0
15700	0	0	0	0	0.0133333	0	0	0	0	0	0	0	0	0.011236	0	0.0153846	0	0	0	0	0	0	0	0	0	0	0	0	0	0	0	0	0	0	0	0	0	0	0	0	0	0	0	0	0	0	0	0	0
15800	0	0	0	0	0	0	0	0	0	0	0	0	0	0	0	0	0	0	0	0	0	0	0	0	0.0136054	0	0	0	0	0	0	0	0.00833333	0	0	0	0	0	0	0	0	0	0	0	0	0	0	0	0
15900	0	0	0	0.0119048	0	0	0	0	0	0	0	0	0	0.011236	0	0	0	0	0	0	0	0	0	0	0	0	0	0	0	0	0	0	0	0	0.00869565	0.00862069	0	0	0	0	0	0	0	0	0	0	0	0	0
16000	0	0	0	0.0119048	0	0	0	0.0104167	0.00990099	0	0	0	0	0	0	0	0	0	0	0	0	0	0.010989	0	0	0	0	0	0	0	0	0	0	0.031746	0	0	0	0	0	0	0	0	0	0	0	0	0	0	0
16100	0	0	0	0	0	0	0	0	0	0	0	0.0133333	0.0120482	0	0	0	0	0.0133333	0	0	0	0.00869565	0	0	0	0.00970874	0	0	0	0	0	0	0	0	0	0	0.0126582	0	0	0	0	0	0	0	0	0	0	0	0
16200	0	0	0	0	0	0	0	0	0	0	0	0	0	0	0	0	0	0	0.0135135	0	0	0	0	0	0	0	0	0	0	0	0.015873	0	0	0	0	0	0.0126582	0	0.01	0	0	0	0	0	0	0	0	0	0
16300	0.00694444	0	0	0	0	0	0	0	0	0	0	0	0	0	0	0	0	0	0	0	0	0	0	0	0	0	0	0	0	0	0	0	0	0	0	0	0	0	0	0	0	0	0	0	0	0	0	0	0
16400	0.00694444	0	0.0126582	0.0119048	0	0	0	0	0	0	0	0	0	0	0	0	0	0	0	0	0	0	0	0	0	0	0	0	0	0	0	0	0	0	0	0	0	0	0	0	0	0	0	0	0.00645161	0	0	0	0
16500	0	0	0	0	0	0	0	0.0104167	0	0	0	0	0.0120482	0	0	0	0	0	0.0135135	0	0	0	0	0	0	0	0	0	0	0.00699301	0	0	0	0	0	0	0	0	0	0	0	0	0.0266667	0	0	0	0	0	0
16600	0	0	0.0126582	0	0	0	0	0	0	0	0	0	0.0120482	0.011236	0	0	0	0	0	0	0	0	0	0	0	0	0	0	0	0	0	0	0	0	0	0	0.0126582	0.00490196	0	0.00537634	0	0	0	0	0	0	0.00862069	0	0
16700	0	0	0	0	0	0	0	0	0	0	0	0.0133333	0	0.011236	0	0	0	0	0	0.0123457	0	0	0.010989	0	0	0	0	0	0	0	0	0	0	0	0	0	0	0	0	0	0	0	0	0	0	0	0	0	0
16800	0	0	0.0126582	0.0119048	0	0	0	0	0	0	0	0	0	0	0.011236	0	0	0	0	0	0	0	0	0	0	0	0	0	0	0	0	0	0	0	0	0	0	0	0	0	0	0	0	0	0	0	0	0	0
16900	0	0	0	0	0	0.016129	0	0	0	0	0	0	0	0	0.011236	0	0	0.0133333	0	0	0	0.00869565	0	0	0	0	0	0	0	0	0	0	0	0	0	0	0	0	0	0	0	0	0	0.008	0	0	0.00862069	0	0
17000	0	0	0	0	0	0	0	0	0	0.0078125	0	0	0	0	0	0.0153846	0	0	0	0	0	0	0.010989	0	0	0	0	0	0	0	0	0	0	0	0.00869565	0	0	0	0.01	0	0	0	0.0133333	0	0	0	0	0	0
17100	0.00694444	0	0	0	0.0133333	0	0	0	0	0	0	0	0	0	0	0	0	0	0	0	0.00478469	0	0	0	0	0.00970874	0	0	0	0	0	0	0	0	0	0	0	0	0	0	0.0135135	0	0	0	0	0	0.00862069	0	0
17200	0	0	0.0126582	0	0	0	0.0041841	0	0	0	0	0	0	0	0	0.0153846	0	0	0	0	0	0	0	0	0	0	0	0	0	0	0	0	0	0	0	0	0	0	0	0	0	0	0	0	0	0	0	0	0
17300	0	0	0	0	0	0.016129	0	0.0104167	0	0	0	0	0.0120482	0	0	0	0	0	0	0.0123457	0	0	0	0	0	0	0	0	0	0.00699301	0	0	0	0	0	0	0	0	0	0	0	0.015873	0	0	0	0	0	0	0
17400	0	0	0	0	0	0	0	0	0	0	0	0	0	0	0	0	0	0	0	0	0	0	0	0	0	0	0	0	0	0	0	0	0	0	0.00869565	0.00862069	0	0	0	0	0	0	0	0	0	0	0	0	0
17500	0	0	0	0	0	0	0	0	0	0	0.00645161	0	0.0120482	0	0	0	0	0	0	0	0	0	0	0	0	0	0	0	0	0	0	0	0	0	0	0	0	0	0	0	0	0	0	0	0	0	0.00862069	0	0
17600	0	0	0.0126582	0	0	0	0	0	0	0	0	0.0133333	0	0.011236	0	0	0	0	0	0.0123457	0	0	0	0	0	0	0	0.00943396	0	0	0	0	0	0	0	0	0	0	0	0	0	0	0	0	0	0	0	0	0
17700	0	0	0	0	0	0	0	0	0	0	0	0	0	0	0	0	0	0	0	0	0	0	0	0	0	0	0	0	0	0	0	0	0	0	0	0	0	0	0	0	0	0	0	0	0	0	0	0.00520833	0
17800	0	0	0	0	0	0	0	0	0	0	0	0	0	0	0	0	0	0	0	0	0	0	0.010989	0	0	0	0	0.00943396	0	0	0	0	0	0	0	0	0.0126582	0	0	0	0	0	0	0.008	0	0	0	0	0
17900	0	0	0	0	0	0	0	0	0	0	0	0	0	0	0	0	0	0	0	0	0	0	0	0	0	0	0	0	0	0	0	0	0.00833333	0	0	0	0	0	0	0	0	0	0	0	0	0	0	0	0
18000	0	0	0	0	0	0	0	0	0	0.0078125	0	0	0	0	0	0	0	0	0.0135135	0	0	0	0	0	0	0	0	0	0	0	0.015873	0	0	0	0	0	0	0	0	0	0	0	0	0	0	0	0	0	0
18100	0	0	0	0	0	0	0	0	0	0	0	0	0	0	0	0.0153846	0	0.0133333	0	0	0	0	0	0	0	0	0	0	0	0	0.015873	0	0	0	0	0	0	0	0	0	0	0	0	0	0	0	0	0	0
18200	0	0	0	0	0	0	0	0.0104167	0	0	0	0.0266667	0	0	0	0	0	0	0	0	0	0	0	0	0	0	0	0	0	0	0	0	0	0	0	0	0	0	0	0	0	0	0	0	0	0	0	0	0
18300	0	0	0	0	0	0	0	0	0	0	0	0	0	0	0.011236	0	0	0	0	0	0	0	0	0	0	0	0	0	0	0	0	0	0.0166667	0	0	0	0	0	0	0	0	0	0	0	0	0	0	0	0
18400	0	0	0	0.0119048	0	0	0	0	0	0	0	0	0	0	0	0.0153846	0	0	0	0	0	0	0	0	0	0	0	0	0	0	0	0	0	0	0	0	0	0	0.01	0	0	0	0	0	0	0	0	0	0
18500	0	0	0	0	0	0	0	0	0	0	0	0	0	0	0	0	0	0	0	0	0	0	0.010989	0	0	0	0	0	0	0	0	0	0.00833333	0	0	0	0	0	0	0	0	0	0	0	0	0	0	0	0
18600	0	0	0	0	0	0	0	0	0	0	0	0	0	0	0	0	0	0	0	0	0	0	0	0	0	0	0	0	0	0	0	0	0	0	0	0	0	0	0	0	0	0	0	0	0	0	0	0	0
18700	0	0	0	0	0	0.016129	0	0	0	0	0	0	0	0	0	0	0	0	0	0.0123457	0	0	0	0	0	0	0.00534759	0	0	0.00699301	0.015873	0	0	0.015873	0	0	0	0	0	0	0	0.015873	0	0	0	0	0	0	0
18800	0	0	0	0	0.0133333	0	0	0	0	0	0	0	0	0	0	0	0	0	0	0	0	0	0	0	0	0	0	0	0	0	0.031746	0	0	0	0	0	0	0	0	0	0	0.015873	0	0	0	0	0	0	0
18900	0	0	0	0	0	0	0	0	0	0	0	0.0133333	0	0	0	0	0	0	0	0	0	0	0.010989	0	0.00680272	0	0	0	0	0	0	0	0	0	0	0	0.0126582	0	0	0	0	0	0	0	0	0	0	0	0
19000	0	0	0.0126582	0	0	0	0	0	0	0	0	0	0.0120482	0	0.0224719	0	0	0	0	0	0	0	0	0	0	0	0	0	0	0	0	0	0	0	0	0.00862069	0	0	0	0	0	0	0	0	0	0	0	0	0
19100	0	0	0	0	0	0	0	0	0	0	0	0	0	0	0	0	0	0	0	0.0123457	0	0	0	0	0	0	0	0	0	0	0	0	0.00833333	0	0	0	0	0	0	0	0	0	0	0	0	0	0	0	0
19200	0	0	0	0	0	0.0322581	0	0	0	0	0	0	0	0	0	0.0153846	0	0.0133333	0	0	0	0	0	0	0.00680272	0	0	0	0	0	0	0	0	0.015873	0	0	0	0	0	0	0	0.015873	0	0	0	0	0	0	0
19300	0	0	0	0	0	0	0	0	0	0	0	0	0	0	0	0	0	0	0	0	0	0	0	0	0	0	0	0	0.00617284	0	0	0	0	0	0	0	0	0	0	0	0	0	0.0133333	0	0	0	0	0	0
19400	0	0	0	0	0	0.016129	0	0	0	0	0	0	0.0120482	0	0	0	0	0	0	0	0	0	0	0	0	0	0	0	0	0	0	0.00671141	0	0	0	0	0	0	0	0	0	0	0	0.008	0	0	0	0	0
19500	0	0	0	0	0	0	0	0	0	0	0	0	0	0	0	0	0	0.0133333	0	0	0	0	0	0	0	0	0	0	0	0	0	0	0	0	0	0	0	0	0	0	0	0	0	0	0	0	0	0	0
19600	0	0	0	0	0	0	0	0	0	0	0	0	0	0	0	0	0	0	0.0135135	0	0	0	0	0	0	0	0	0	0	0	0	0	0	0	0	0	0	0	0	0	0	0.015873	0.0133333	0	0	0	0	0	0
19700	0	0	0	0	0	0	0	0	0.00990099	0	0	0	0	0	0	0	0	0	0	0	0	0	0	0	0	0	0	0	0	0	0	0	0	0	0	0.00862069	0	0	0	0	0	0	0	0	0	0	0	0	0
19800	0	0	0	0	0	0.016129	0	0	0	0	0	0	0	0	0	0	0	0	0	0.0123457	0	0	0.010989	0	0	0	0	0	0	0	0.015873	0	0	0	0	0	0	0	0	0	0	0	0	0	0	0	0	0	0
19900	0	0	0	0.0119048	0	0	0	0	0.00990099	0	0	0.0133333	0	0	0	0	0	0	0	0	0	0	0	0	0	0	0	0	0	0	0	0	0	0	0	0	0.0126582	0	0	0	0	0	0	0	0	0	0	0	0
20000	0	0	0	0	0	0	0	0	0	0	0	0	0	0	0	0	0	0	0.0135135	0	0	0	0	0	0	0	0	0	0	0	0	0	0	0	0	0	0	0	0	0	0	0	0	0	0	0	0	0	0
20100	0	0	0.0126582	0	0	0	0	0	0	0	0	0	0	0	0	0	0	0	0	0	0	0	0	0	0	0	0	0	0	0	0	0	0	0	0	0	0	0	0	0	0	0	0	0	0	0	0	0	0
20200	0	0	0	0	0	0	0	0	0	0	0	0.0133333	0	0	0	0	0	0	0	0	0	0	0	0	0	0	0	0	0	0	0	0	0	0	0	0	0	0	0	0	0	0	0	0	0	0	0	0	0
20300	0	0	0	0	0	0	0	0	0	0	0	0	0	0	0	0	0	0	0.0135135	0	0	0	0	0	0	0.00970874	0	0	0	0	0	0	0	0	0	0	0	0	0	0	0.0135135	0	0	0	0	0	0	0	0
20400	0	0	0	0	0	0	0	0	0	0	0	0.0133333	0	0	0	0	0	0	0.0135135	0	0	0	0	0	0	0	0	0	0	0	0	0	0	0	0	0	0	0	0	0	0.0135135	0	0	0	0	0	0	0	0
20500	0	0	0	0	0	0	0	0	0	0	0	0	0	0	0	0	0	0.0133333	0	0	0	0	0	0	0	0	0	0	0	0	0	0	0	0	0	0	0	0	0	0	0	0	0	0	0	0	0	0	0
20600	0	0	0	0	0	0	0	0	0	0	0	0.0133333	0	0	0	0.0153846	0	0	0	0	0	0	0	0	0	0	0	0	0	0	0	0	0	0	0	0	0	0	0	0	0	0	0	0	0	0	0	0	0
20700	0	0	0	0	0.0133333	0	0	0	0	0	0	0	0	0	0	0	0	0	0	0	0	0	0	0	0	0	0	0	0	0	0	0	0	0	0	0	0	0	0	0	0	0	0	0	0	0	0	0	0
20800	0	0	0	0	0	0	0	0	0	0	0	0	0	0	0	0	0	0.0133333	0	0	0	0	0	0	0	0	0	0	0	0	0	0	0	0	0	0.00862069	0	0	0	0	0	0.015873	0	0	0	0	0.00862069	0	0
20900	0	0	0	0	0	0	0	0	0	0	0	0	0	0	0	0	0	0	0	0	0	0	0	0	0	0	0	0	0	0	0	0	0	0	0	0	0	0	0	0	0	0	0	0	0	0	0	0	0
21000	0	0	0	0	0	0	0	0	0	0	0	0	0	0	0	0	0	0	0	0	0	0	0	0	0	0	0	0	0	0	0	0	0	0	0	0	0	0	0	0	0	0	0	0	0	0	0	0	0
21100	0	0	0	0	0	0	0	0	0	0	0	0	0	0	0	0	0	0	0	0	0	0	0	0	0	0	0	0	0	0	0	0	0	0	0	0	0	0	0	0	0	0	0	0	0	0	0	0	0
21200	0	0	0	0	0	0	0	0	0	0	0	0	0	0	0	0	0	0	0	0	0	0	0	0	0	0	0	0	0	0	0	0	0	0	0	0	0	0	0	0	0	0	0	0	0.00645161	0	0	0	0
21300	0	0	0	0	0	0.016129	0	0	0	0	0	0.0133333	0	0	0	0	0	0.0133333	0	0	0	0	0.010989	0	0	0	0	0	0	0	0	0	0	0	0	0	0	0	0	0	0	0	0	0	0	0	0	0	0
21400	0	0	0	0	0	0	0	0	0	0	0	0	0	0	0	0	0	0	0	0	0	0	0	0	0	0	0	0	0	0	0	0	0	0	0	0	0	0	0	0	0	0	0	0	0	0	0	0	0
21500	0	0	0	0	0.0133333	0	0	0	0	0	0	0	0	0	0	0	0	0	0.0135135	0	0	0	0	0	0	0	0	0	0	0	0	0	0	0	0	0	0	0	0	0	0	0	0	0	0	0	0	0	0
21600	0	0	0	0	0	0	0	0	0	0	0	0	0	0	0	0	0	0	0	0	0	0	0	0	0	0	0	0	0	0	0	0	0	0	0	0	0	0	0	0	0	0	0	0	0	0	0	0	0
21700	0	0	0	0	0	0.016129	0	0	0	0	0	0	0	0	0	0	0	0	0	0	0	0	0.010989	0	0	0	0	0	0	0	0	0	0	0	0	0	0	0	0	0	0	0	0	0	0	0	0	0	0
21800	0	0	0	0	0	0	0	0	0	0	0.00645161	0	0	0	0	0	0	0	0	0	0	0	0	0	0	0	0	0	0	0	0	0	0	0	0	0	0	0	0	0	0	0	0	0	0	0	0	0	0
21900	0	0	0	0	0	0	0	0	0	0	0	0	0.0120482	0	0	0	0	0	0	0	0	0	0	0	0	0	0	0.00943396	0	0	0	0	0	0	0	0	0	0	0	0	0	0	0	0	0	0	0	0	0
22000	0	0	0	0.0119048	0	0	0	0	0	0	0	0	0	0	0	0	0	0	0	0	0	0	0	0	0	0	0	0	0	0	0.015873	0	0	0	0	0	0	0	0	0	0	0	0.0133333	0	0	0	0	0	0
22100	0	0	0	0	0	0	0	0	0	0	0	0	0	0	0	0	0	0	0	0	0	0	0	0	0	0	0	0	0	0	0	0	0	0.015873	0	0	0	0	0	0	0	0	0	0	0	0	0	0	0
22200	0	0	0	0	0	0	0	0	0	0	0	0	0	0	0	0.0153846	0	0	0	0	0	0	0.010989	0	0	0	0	0	0	0	0	0	0	0	0.00869565	0	0	0	0	0	0	0	0	0	0	0	0	0	0
22300	0	0	0	0	0	0	0	0	0	0	0	0	0	0	0.011236	0	0	0	0	0	0	0	0	0	0	0	0	0	0	0	0	0	0.00833333	0	0	0	0	0	0	0	0	0	0	0	0	0	0	0	0
22400	0	0	0	0	0	0.016129	0	0	0	0	0	0	0	0	0	0	0	0	0	0	0	0	0	0	0	0	0	0	0	0	0	0	0	0	0	0	0	0	0	0	0	0	0	0	0	0	0	0	0
22500	0	0	0	0	0	0	0	0	0	0	0	0	0	0	0	0	0	0	0	0	0	0	0	0	0	0	0	0	0	0	0	0	0	0	0	0	0	0	0	0	0	0	0	0	0	0	0	0	0
22600	0	0	0	0	0	0	0	0	0	0	0	0	0	0	0	0	0	0.0133333	0	0	0	0	0.010989	0	0	0	0	0	0	0	0	0	0	0	0	0	0	0	0	0	0	0.015873	0	0	0	0	0	0	0
22700	0	0	0	0	0	0	0	0	0	0	0	0	0	0	0	0	0	0	0	0	0	0	0	0.011236	0	0	0	0	0	0	0	0	0	0	0	0	0.0126582	0	0	0	0	0	0	0	0	0	0	0	0
22800	0	0	0.0126582	0	0	0	0	0	0	0	0	0	0	0	0	0	0	0	0	0	0	0	0	0	0	0	0	0	0	0	0	0	0	0	0	0	0	0	0	0	0	0.015873	0	0	0	0	0	0	0
22900	0	0	0	0	0	0	0	0	0	0	0	0	0	0	0	0.0153846	0	0	0	0	0	0	0	0	0	0	0	0	0	0	0	0	0	0	0	0.00862069	0	0	0.01	0	0.027027	0	0	0	0	0	0	0	0
23000	0	0	0	0	0	0	0	0	0	0	0	0	0	0	0	0	0	0	0	0	0	0	0	0	0	0	0	0.00943396	0.00617284	0	0	0	0	0	0	0	0	0	0	0	0	0	0	0	0	0	0	0	0
23100	0	0	0	0	0	0	0	0	0	0	0	0	0	0	0	0	0	0	0	0	0	0	0	0	0	0	0	0	0	0	0	0	0	0	0	0	0	0	0.01	0	0	0	0	0	0	0	0	0	0
23200	0	0	0	0	0	0	0	0	0	0	0	0	0	0	0	0	0	0	0	0	0	0	0	0	0	0	0	0	0	0	0	0	0	0.015873	0	0	0	0	0	0	0	0	0	0	0	0	0	0	0
23300	0	0	0	0	0	0	0	0	0	0	0	0.0133333	0	0	0	0	0	0	0	0	0	0	0	0	0	0.00970874	0	0	0	0	0	0	0	0	0	0	0.0126582	0	0	0	0	0	0	0	0	0	0	0	0
23400	0	0	0	0	0	0	0	0.0104167	0	0	0	0	0	0	0	0	0	0	0	0	0	0	0	0	0	0	0	0	0	0	0	0	0	0	0	0	0	0	0	0	0	0	0	0	0	0	0	0	0
23500	0	0	0	0	0	0	0	0	0	0	0	0	0	0	0	0	0	0.0133333	0	0	0	0	0	0	0	0.00970874	0	0	0	0	0	0	0	0	0	0	0	0	0	0	0	0	0	0	0	0	0	0	0
23600	0	0	0	0	0	0	0	0	0	0	0	0	0	0	0	0	0	0	0	0	0	0	0	0	0	0	0	0	0	0	0	0	0	0	0	0	0	0	0	0	0	0.015873	0	0	0	0	0	0	0
23700	0	0	0	0	0	0	0	0	0	0	0	0	0	0	0	0	0	0	0	0	0	0	0	0	0	0	0	0	0	0	0	0	0	0	0	0	0	0	0	0	0	0	0	0	0	0	0	0	0
23800	0	0	0	0	0	0	0	0.0104167	0	0	0	0	0	0	0	0	0	0	0	0	0	0	0	0	0	0	0	0	0	0	0	0	0	0	0	0	0	0	0	0	0	0	0	0	0	0	0	0	0
23900	0	0	0	0	0	0	0	0	0	0.0078125	0	0	0	0	0	0	0	0	0	0	0	0	0	0	0	0	0	0	0	0	0	0	0	0	0	0	0	0	0	0	0	0	0	0	0	0	0	0	0
24000	0	0	0	0	0	0	0	0	0	0	0	0	0	0	0	0	0	0	0	0	0	0	0	0	0	0	0	0	0	0	0	0	0	0	0	0	0	0	0	0	0.0135135	0	0	0	0	0	0	0	0
24100	0	0	0	0	0	0	0	0	0	0	0	0	0	0	0	0	0	0	0	0	0	0	0	0	0	0	0	0	0	0	0	0	0	0	0	0	0	0	0	0	0	0	0	0	0	0	0	0	0
24200	0	0	0	0.0119048	0	0	0	0	0	0	0	0	0	0.011236	0	0	0	0	0	0	0	0	0	0	0	0	0	0	0	0	0	0	0	0	0	0	0	0	0	0	0	0	0	0	0	0	0	0	0
24300	0	0	0	0	0	0	0	0	0	0	0	0	0	0	0	0	0	0	0	0	0	0	0	0	0	0	0	0	0	0	0	0	0	0	0	0	0	0	0	0	0	0	0	0	0	0	0	0	0
24400	0	0	0	0	0	0	0	0	0	0	0	0	0	0	0	0	0	0	0	0	0	0	0	0	0	0	0	0	0	0	0	0	0	0	0	0	0	0	0	0	0	0	0	0	0	0	0	0	0
24500	0	0	0	0	0	0	0	0	0	0	0	0	0	0	0	0	0	0	0	0.0123457	0	0	0	0	0	0	0	0	0	0	0	0	0	0	0	0	0	0	0	0	0	0	0	0	0	0	0	0	0
24600	0	0	0	0	0	0	0	0	0	0	0	0	0.0120482	0	0	0	0	0	0.0135135	0	0	0	0	0	0	0	0	0	0	0	0	0	0	0	0	0	0	0	0	0	0	0	0	0	0	0	0	0	0
24700	0	0	0	0	0	0	0	0	0	0	0	0	0	0	0	0	0	0	0	0	0.00478469	0	0	0	0	0	0	0	0	0	0	0	0	0	0	0	0	0	0	0	0	0	0.0133333	0	0	0	0	0	0
24800	0	0	0	0	0	0	0	0	0	0	0	0	0	0	0	0	0	0	0	0	0	0	0	0	0	0	0	0	0	0	0.015873	0.00671141	0	0	0	0	0	0	0	0	0	0	0	0	0	0	0	0	0
24900	0	0	0	0	0	0	0	0	0	0	0	0	0	0	0	0	0	0	0	0	0	0	0	0	0	0	0	0	0	0	0	0	0	0	0	0	0	0	0	0	0	0	0	0	0	0	0	0	0
25000	0	0	0	0	0	0	0	0	0	0	0	0	0	0	0	0	0	0	0	0	0	0	0	0	0	0	0	0	0	0	0	0	0	0	0	0	0	0	0	0	0	0	0	0	0	0	0	0	0
25100	0	0	0	0	0	0	0	0	0	0	0	0	0	0	0	0.0153846	0	0	0	0	0	0	0	0	0	0	0	0	0	0	0	0	0	0	0	0	0	0	0	0	0	0	0	0	0	0	0	0	0
25200	0	0	0	0	0	0	0	0	0	0	0	0	0	0	0	0	0	0	0	0	0	0	0	0	0	0	0	0	0	0	0	0	0	0	0	0	0	0	0	0	0	0	0	0	0	0	0	0	0
25300	0	0	0	0	0	0	0	0	0.00990099	0	0	0	0	0	0	0	0	0	0	0	0	0	0	0.011236	0	0	0	0	0	0	0	0	0	0	0	0	0.0126582	0	0	0	0	0	0	0	0	0	0	0	0
25400	0	0	0	0	0	0	0	0	0	0	0	0	0.0120482	0	0	0	0	0	0	0	0	0	0	0	0	0	0	0	0	0	0	0	0	0	0	0	0	0	0	0	0	0	0	0	0	0	0	0	0
25500	0	0	0	0	0	0	0	0	0	0	0	0	0	0	0	0	0	0	0	0	0	0	0	0	0	0	0	0	0	0	0	0	0	0.015873	0	0	0	0	0	0	0	0	0	0	0	0	0	0	0
25600	0	0	0	0	0	0	0	0	0	0	0	0	0	0	0	0	0	0	0	0	0	0	0	0	0	0	0	0	0	0	0	0	0	0	0	0	0	0	0	0	0	0	0	0	0	0	0	0	0
25700	0	0	0	0	0	0	0	0	0	0	0	0	0	0	0	0	0	0	0	0	0	0	0	0	0	0	0	0	0	0	0	0	0	0	0	0	0	0	0	0	0	0	0	0	0	0	0	0	0
25800	0	0	0	0	0	0	0	0	0	0	0	0	0	0	0	0	0	0	0	0	0	0	0	0	0	0	0	0	0	0	0	0	0	0	0	0	0	0	0	0	0	0	0.0133333	0	0	0	0	0	0
25900	0	0	0	0	0	0.016129	0	0	0.00990099	0	0	0	0	0	0	0	0	0	0	0	0	0	0	0	0	0	0	0	0	0	0	0	0	0	0	0	0	0	0	0	0	0	0	0	0	0	0	0	0
26000	0	0	0	0	0	0	0	0	0	0	0	0	0	0	0	0	0	0	0	0	0	0	0	0	0	0	0	0	0	0	0	0	0	0	0	0	0	0	0	0	0	0	0	0	0	0	0	0	0
26100	0	0	0	0	0	0	0	0	0	0	0	0	0	0	0	0	0	0.0133333	0	0	0	0	0	0	0	0	0	0	0	0	0	0	0	0	0	0	0	0	0	0	0	0	0	0	0	0	0	0	0
26200	0	0	0	0	0	0	0	0	0	0	0	0	0	0	0	0	0	0	0	0	0	0	0	0	0	0	0	0	0	0	0	0	0	0	0	0	0	0	0	0	0	0	0	0	0	0	0	0	0
26300	0	0	0	0	0	0	0	0.0104167	0	0	0	0	0	0	0	0	0	0	0	0	0	0	0	0	0	0	0	0	0	0	0	0	0	0	0	0	0	0	0	0	0	0	0	0	0	0	0	0	0
26400	0	0	0	0	0	0	0	0	0	0	0	0	0	0	0	0	0	0	0	0	0	0	0	0	0	0	0	0	0	0	0	0	0	0	0.00869565	0	0	0	0	0	0	0	0	0	0	0	0	0	0
26500	0	0	0	0	0	0	0	0	0	0	0	0	0	0	0	0	0	0	0	0	0	0	0	0	0	0	0	0	0	0	0	0	0	0	0	0	0	0	0	0	0	0	0.0133333	0	0	0	0	0	0
26600	0	0	0	0	0	0	0	0	0	0	0	0	0	0	0	0	0	0	0	0	0	0	0	0	0	0	0	0	0	0	0	0	0	0	0	0	0	0	0	0	0	0	0	0	0	0	0	0	0
26700	0	0	0	0	0	0	0	0	0	0	0	0	0	0	0	0	0	0	0	0	0	0	0	0	0	0	0	0	0	0	0	0	0	0	0	0	0	0	0	0	0	0	0	0	0	0	0	0	0
26800	0	0	0.0126582	0	0	0	0	0	0	0	0	0	0	0	0	0	0	0	0	0	0	0	0	0	0	0	0	0	0	0	0	0	0	0	0	0	0	0	0	0	0	0	0	0	0	0	0	0	0
26900	0	0	0	0	0	0	0	0	0	0	0	0	0	0	0	0	0	0	0	0	0	0	0	0	0	0	0	0	0	0	0	0	0	0	0	0	0	0	0	0	0	0	0	0	0	0	0	0	0
27000	0	0	0	0	0	0	0	0	0	0	0	0	0	0	0	0	0	0	0	0	0	0	0	0	0	0	0	0	0	0	0	0	0	0	0	0	0	0	0	0	0	0	0	0	0	0	0	0	0
27100	0	0	0	0	0	0	0	0	0	0	0	0	0	0	0	0	0	0	0	0	0	0	0	0	0	0	0	0	0	0	0	0	0	0	0.00869565	0	0	0	0	0	0	0	0	0	0	0	0	0	0
27200	0	0	0	0	0	0	0	0	0	0	0	0	0	0	0	0	0	0	0	0	0	0	0	0	0	0	0	0	0	0	0	0	0	0	0	0	0	0	0	0	0	0	0	0	0	0	0	0	0
27300	0	0	0	0	0	0	0	0	0	0	0	0	0	0	0	0	0	0	0	0.0123457	0	0	0	0	0	0	0	0	0	0	0	0	0	0	0	0	0	0	0	0	0.027027	0	0	0	0	0	0	0	0
27400	0	0	0	0	0	0	0	0	0	0	0	0	0	0	0	0	0	0	0	0	0	0	0	0	0	0	0	0	0	0	0	0	0	0	0	0	0	0	0	0	0	0	0	0	0	0	0	0	0
27500	0	0	0	0	0	0	0	0	0	0	0	0	0	0	0	0	0	0	0	0	0	0	0	0	0	0	0	0	0	0	0	0	0	0.015873	0	0	0	0	0	0	0	0	0	0	0	0	0	0	0
27600	0	0	0	0	0	0	0	0	0	0	0	0	0	0	0	0	0	0	0	0	0	0	0	0	0	0	0	0	0	0	0	0	0	0.015873	0	0	0	0	0	0	0	0	0	0	0	0	0	0	0
27700	0	0	0	0	0	0	0	0	0	0	0	0	0	0	0.011236	0	0	0	0	0	0	0	0	0	0	0	0	0	0	0	0	0	0	0	0	0	0	0	0	0	0	0	0	0	0	0	0	0	0
27800	0	0	0	0	0	0	0	0	0	0	0	0	0	0	0	0	0	0	0	0	0	0	0	0	0	0	0	0	0	0	0	0	0	0	0	0	0	0	0	0	0	0	0	0	0	0	0	0	0
27900	0	0	0	0	0	0	0	0	0	0	0	0	0	0	0	0	0	0	0	0	0	0	0	0	0	0	0	0	0	0	0	0	0	0	0	0	0	0	0	0	0	0	0	0	0	0	0	0	0
28000	0	0	0	0	0	0	0	0	0	0	0	0	0	0	0	0	0	0	0	0	0	0	0	0	0	0	0	0	0	0	0	0	0	0	0	0	0	0	0	0	0	0	0	0	0	0	0	0	0
28100	0	0	0	0	0	0	0	0	0.00990099	0	0	0	0	0.011236	0	0	0	0	0	0	0	0	0	0	0	0	0	0	0	0	0	0	0	0	0	0	0	0	0	0	0	0	0	0	0	0	0	0	0
28200	0	0	0.0126582	0	0	0	0	0	0	0	0	0	0	0	0	0	0	0	0	0	0	0	0	0	0	0	0	0	0	0	0	0	0	0	0	0	0	0	0	0	0.0135135	0	0	0	0	0	0	0	0
28300	0	0	0	0	0	0	0	0	0	0	0	0	0	0	0	0	0	0	0	0	0	0	0	0	0	0	0	0	0	0	0	0	0	0	0	0	0	0	0	0	0	0	0	0	0	0	0	0	0
28400	0	0	0	0	0	0	0	0	0	0	0	0	0	0	0	0	0	0	0	0	0	0	0	0	0	0	0	0	0	0	0	0	0	0	0	0	0	0	0	0	0	0	0	0	0	0	0	0	0
28500	0	0	0	0	0	0	0	0	0	0	0	0	0	0	0	0	0	0	0	0	0	0	0	0	0	0	0	0	0	0	0	0	0	0	0	0	0	0	0	0	0	0	0	0	0	0	0	0	0
28600	0	0	0	0	0	0	0	0	0	0	0	0	0	0	0	0	0	0	0	0	0	0	0	0	0	0	0	0	0	0	0	0	0	0	0	0	0	0	0	0	0	0.015873	0.0133333	0	0	0	0	0	0
28700	0	0	0	0	0	0	0	0	0	0	0	0	0	0	0	0	0	0	0	0	0	0	0	0	0	0	0	0	0	0	0	0	0	0	0	0	0	0	0	0	0	0	0	0	0	0	0	0	0
28800	0	0	0	0	0	0	0	0	0	0	0	0	0	0	0	0	0	0	0	0	0	0	0	0	0	0	0	0	0	0	0	0	0	0	0	0	0	0	0	0	0	0	0	0	0	0	0	0	0
28900	0	0	0	0	0	0	0	0	0	0	0	0	0	0	0	0	0	0	0	0	0	0	0	0	0	0	0	0	0	0	0	0	0	0	0	0	0	0	0	0	0	0	0	0	0	0	0	0	0
29000	0	0	0	0	0	0	0	0	0	0	0	0	0	0	0	0	0	0	0	0	0	0	0	0	0	0	0	0	0	0	0	0	0	0	0	0	0	0	0	0	0	0	0	0	0	0	0	0	0
29100	0	0	0	0	0	0	0	0	0	0	0	0	0	0	0	0	0	0	0	0	0	0	0	0	0	0	0	0	0	0	0	0	0	0	0	0	0	0	0	0	0	0	0	0	0	0	0	0	0
29200	0	0	0	0	0	0	0	0	0	0	0	0	0	0	0	0	0	0	0	0.0123457	0	0	0	0	0	0	0	0	0	0	0	0	0	0	0	0	0	0	0	0	0	0	0.0133333	0	0	0	0	0	0
29300	0	0	0	0	0	0	0	0	0	0	0	0	0	0	0	0	0	0	0	0	0	0	0	0	0	0	0	0	0	0	0	0	0	0	0	0	0	0	0	0	0	0	0	0	0	0	0	0	0
29400	0	0	0	0	0	0	0	0	0	0	0	0	0	0	0	0	0	0	0	0	0	0	0	0	0	0	0	0	0	0	0.015873	0	0	0	0	0	0	0	0	0	0	0	0	0	0	0	0	0	0
29500	0	0	0	0	0	0	0	0	0	0	0	0	0	0	0	0	0	0	0	0	0	0	0	0	0	0	0	0	0	0	0	0	0	0	0	0	0	0	0	0	0	0	0	0	0	0	0	0	0
29600	0	0	0	0	0	0	0	0	0	0	0	0	0	0	0	0	0	0	0	0	0	0	0	0	0	0	0	0	0	0	0	0	0	0	0	0	0	0	0	0	0	0	0	0	0	0	0	0	0
29700	0	0	0	0	0	0	0	0	0	0	0	0	0	0	0	0	0	0	0	0	0	0	0	0	0	0	0	0	0	0	0	0	0	0	0	0	0	0	0	0	0	0	0	0	0	0	0	0	0
29800	0	0	0	0	0	0	0	0	0	0	0	0	0	0	0	0	0	0	0	0	0	0	0	0	0	0	0	0	0	0	0	0	0	0	0	0	0	0	0	0	0	0	0	0	0	0	0	0	0
29900	0	0	0	0	0	0	0	0	0	0	0	0	0	0	0	0	0	0	0	0	0	0	0	0	0	0	0	0	0	0	0	0	0	0	0	0	0	0	0	0	0	0	0	0	0	0	0	0	0
30000	0	0	0	0	0	0	0	0	0	0	0	0	0	0	0	0	0	0	0	0	0	0	0	0	0	0	0	0	0	0	0	0	0	0	0	0	0	0	0	0	0	0	0	0	0	0	0	0	0
30100	0	0	0	0	0	0	0	0	0	0	0	0	0	0	0	0	0	0	0	0	0	0	0	0	0	0	0	0	0	0	0	0	0	0	0	0	0	0	0	0	0	0	0	0	0	0	0	0	0
30200	0	0	0	0	0	0	0	0	0	0	0	0	0	0	0	0	0	0	0	0	0	0	0	0	0	0	0	0	0	0	0	0	0	0	0	0	0	0	0	0	0	0	0	0	0	0	0	0	0
30300	0	0	0	0	0	0	0	0	0	0	0	0	0	0	0	0	0	0	0	0	0	0	0	0	0	0	0	0	0	0	0	0	0	0	0	0	0	0	0	0	0	0	0	0	0	0	0	0	0
30400	0	0	0	0	0	0	0	0	0	0	0	0	0	0	0	0	0	0	0	0	0	0	0	0	0	0	0	0	0	0	0	0	0	0	0	0	0	0	0	0	0	0	0	0	0	0	0	0	0
30500	0	0	0	0	0	0	0	0	0	0	0	0	0	0	0	0	0	0	0	0	0	0	0	0	0	0	0	0	0	0	0	0	0	0	0	0	0	0	0	0	0	0	0	0	0	0	0	0	0
30600	0	0	0	0	0	0	0	0	0	0	0	0	0	0	0	0	0	0	0	0	0	0	0	0	0	0	0	0	0	0	0	0	0	0	0	0	0	0	0	0	0	0	0	0	0	0	0	0	0
30700	0	0	0	0	0	0	0	0	0	0	0	0	0	0	0	0	0	0	0	0	0	0	0	0	0	0	0	0	0	0	0	0	0	0	0	0	0	0	0	0	0	0	0	0	0	0	0	0	0
30800	0	0	0	0	0	0	0	0	0	0	0	0	0	0	0	0	0	0	0	0	0	0	0	0	0	0	0	0	0	0	0.015873	0	0	0	0	0	0	0	0	0	0	0	0	0	0	0	0	0	0
30900	0	0	0	0	0	0	0	0	0	0	0	0	0	0	0	0	0	0	0	0	0	0	0.010989	0	0	0	0	0	0	0	0	0	0	0	0	0	0	0	0	0	0	0	0	0	0	0	0	0	0
31000	0	0	0	0	0	0	0	0	0	0	0	0	0	0	0	0	0	0	0	0	0	0	0	0	0	0	0	0	0	0	0	0	0	0	0	0	0	0	0	0	0	0	0	0	0	0	0	0	0
31100	0	0	0	0	0	0	0	0	0	0	0	0	0	0	0	0	0	0	0	0	0	0	0	0	0	0	0	0	0	0	0	0	0	0	0	0	0	0	0	0	0	0	0	0	0	0	0	0	0
31200	0	0	0	0	0	0.016129	0	0	0	0	0	0	0	0	0	0	0	0	0	0	0	0	0	0	0	0	0	0	0	0	0	0	0	0	0	0	0	0	0	0	0	0	0	0	0	0	0	0	0
31300	0	0	0	0	0	0	0	0	0	0.0078125	0	0	0	0	0	0	0	0	0	0	0	0	0	0	0	0	0	0	0	0	0	0	0	0	0	0	0	0	0	0	0	0	0	0	0	0	0	0	0
31400	0	0	0	0	0	0	0	0	0	0	0	0	0	0	0	0	0	0	0	0	0	0	0	0	0	0	0	0	0	0	0	0	0	0	0	0	0	0	0	0	0	0	0	0	0	0	0	0	0
31500	0	0	0	0	0	0	0	0	0	0	0	0	0	0	0	0	0	0.0133333	0	0	0	0	0	0	0	0	0	0	0	0	0	0	0	0	0	0	0	0	0	0	0	0	0	0	0	0	0	0	0
31600	0	0	0	0	0	0	0	0	0	0	0	0	0	0	0	0	0	0	0	0	0	0	0	0	0	0	0	0	0	0	0	0	0	0	0	0	0	0	0	0	0	0	0	0	0	0	0	0	0
31700	0	0	0	0	0	0	0	0	0	0	0	0	0	0	0	0	0	0	0	0	0	0	0	0	0	0	0	0	0	0	0	0	0	0	0	0	0	0	0	0	0	0	0	0	0	0	0	0	0
31800	0	0	0	0	0	0	0	0	0	0	0	0	0	0	0	0	0	0	0	0	0	0	0	0	0	0	0	0	0	0	0	0	0	0	0	0	0	0	0	0	0	0	0	0	0	0	0	0	0
31900	0	0	0	0	0	0	0	0	0	0	0	0	0	0	0	0	0	0	0	0	0	0	0	0	0	0	0	0	0	0	0	0	0	0	0	0	0	0	0	0	0	0	0	0	0	0	0	0	0
32000	0	0	0	0	0	0	0	0	0	0	0	0	0	0	0	0	0	0	0	0	0	0	0	0	0	0	0	0	0	0	0	0	0	0	0	0	0	0	0	0	0	0	0	0	0	0	0	0	0
32100	0	0	0	0	0	0	0	0	0	0	0	0	0	0	0	0	0	0	0	0	0	0	0	0	0	0.00970874	0	0	0	0	0	0	0	0	0	0	0	0	0	0	0	0	0	0	0	0	0	0	0
32200	0	0	0	0	0	0	0	0	0	0	0	0	0	0	0	0	0	0	0	0	0	0	0	0	0	0	0	0	0	0	0	0	0	0	0	0	0	0	0	0	0	0	0	0	0	0	0	0	0
32300	0	0	0	0	0	0	0	0	0	0	0	0	0	0	0	0	0	0	0	0	0	0	0	0	0	0	0	0	0	0	0	0	0	0	0	0	0	0	0	0	0	0	0	0	0	0	0	0	0
32400	0	0	0	0	0	0	0	0	0	0	0	0	0	0	0	0	0	0	0	0	0	0	0	0	0	0	0	0	0	0	0	0	0	0	0	0	0	0	0	0	0	0	0	0	0	0	0	0	0
32500	0	0	0	0	0	0	0	0	0	0	0	0	0	0	0	0	0	0	0	0	0	0	0	0	0	0	0	0	0	0	0	0	0	0	0	0	0	0	0	0	0	0	0	0	0	0	0	0	0
32600	0	0	0.0126582	0	0	0	0	0	0	0	0	0	0	0	0	0	0	0	0	0	0	0	0	0	0	0	0	0	0	0	0	0	0	0	0	0	0	0	0	0	0	0	0	0	0	0	0	0	0
32700	0	0	0	0	0	0	0	0	0	0	0	0	0	0	0	0	0	0	0	0	0	0	0	0	0	0	0	0	0	0	0	0	0	0	0	0	0	0	0	0	0	0	0	0	0	0	0	0	0
32800	0	0	0	0	0	0	0	0	0	0	0	0	0	0	0	0	0	0	0	0	0	0	0	0	0	0	0	0	0	0	0	0	0	0	0	0	0	0	0	0	0	0	0	0	0	0	0	0	0
32900	0	0	0	0	0	0	0	0	0	0	0	0	0	0	0	0	0	0	0	0	0	0	0	0	0	0	0	0	0	0	0	0	0.00833333	0	0	0	0	0	0	0	0	0	0	0	0	0	0	0	0
33000	0	0	0.0126582	0	0	0	0	0	0	0	0	0	0	0	0	0	0	0	0	0	0	0	0	0	0	0	0	0	0	0	0	0	0	0	0	0	0	0	0	0	0	0	0	0	0	0	0	0	0
33100	0	0	0	0	0	0	0	0	0	0	0	0	0	0	0	0	0	0	0	0	0	0	0	0	0	0	0	0	0	0	0	0	0	0	0	0	0	0	0	0	0	0	0	0	0	0	0	0	0
33200	0	0	0	0	0	0	0	0	0	0	0	0	0	0	0	0	0	0	0	0	0	0	0	0	0	0	0	0	0	0	0	0	0	0	0	0	0	0	0	0	0	0	0	0	0	0	0	0	0
33300	0	0	0	0	0	0	0	0	0	0	0	0	0	0	0	0	0	0	0	0	0	0	0	0	0	0	0	0	0	0	0	0	0	0	0	0	0	0	0	0	0	0	0	0	0	0	0	0	0
33400	0	0	0	0	0	0	0	0	0	0	0	0	0	0	0	0	0	0	0	0	0	0	0	0	0	0	0	0	0	0	0	0	0	0	0	0	0	0	0	0	0	0	0	0	0	0	0	0	0
33500	0	0	0	0	0	0	0	0	0	0	0	0	0	0	0	0	0	0	0	0	0	0	0	0	0	0	0	0	0	0	0	0	0	0	0	0	0	0	0	0	0	0	0	0	0	0	0	0	0
33600	0	0	0	0	0	0	0	0	0	0	0	0	0	0	0	0	0	0	0	0	0	0	0	0	0	0	0	0	0	0	0	0	0	0	0	0	0	0	0	0	0	0	0	0	0	0	0	0	0
33700	0	0	0	0	0	0	0	0	0	0	0	0	0	0	0	0	0	0	0	0	0	0	0	0	0	0	0	0	0	0	0	0	0	0	0	0	0	0	0	0	0	0.015873	0	0	0	0	0	0	0
33800	0	0	0	0.0119048	0	0	0	0	0	0	0	0	0	0	0	0	0	0	0	0	0	0	0	0	0	0	0	0	0	0	0	0	0	0	0	0	0	0	0.01	0	0	0	0	0	0	0	0	0	0
33900	0	0	0	0	0	0	0	0	0	0	0	0	0	0	0	0	0	0	0	0	0	0	0	0	0	0	0	0	0	0	0	0	0	0	0	0	0	0	0	0	0	0	0	0	0	0	0	0	0
34000	0	0	0	0	0	0	0	0	0	0	0	0	0	0	0	0	0	0	0	0	0	0	0	0	0	0	0	0	0	0	0	0	0	0	0	0	0	0	0	0	0	0	0	0	0	0	0	0	0
34100	0	0	0	0	0	0	0	0	0	0	0	0	0	0	0	0	0	0	0	0	0	0	0	0	0	0	0	0	0	0	0	0	0	0	0	0	0	0	0	0	0	0	0	0	0	0	0	0	0
34200	0	0	0	0	0	0	0	0	0	0	0	0	0	0	0	0	0	0	0	0	0	0	0	0	0	0	0	0	0	0	0	0	0	0	0	0	0	0	0	0	0	0	0	0	0	0	0	0	0
34300	0	0	0	0	0	0	0	0	0	0	0	0	0	0	0	0	0	0	0	0	0	0	0	0	0	0	0	0	0	0	0	0	0	0	0	0	0	0	0	0	0	0	0	0	0	0	0	0	0
34400	0	0	0	0	0	0.016129	0	0	0	0	0	0	0	0	0	0	0	0	0	0	0	0	0	0	0	0	0	0	0	0	0	0	0	0	0	0	0	0	0	0	0	0	0	0	0	0	0	0	0
34500	0	0	0	0	0	0	0	0	0	0	0	0	0	0	0	0	0	0	0	0	0	0	0	0	0	0	0	0	0	0	0	0	0	0	0	0	0	0	0	0	0	0	0	0	0	0	0	0	0
34600	0	0	0	0	0	0	0	0	0	0	0	0	0	0	0	0	0	0	0	0	0	0	0	0	0	0	0	0	0	0	0	0	0	0	0	0	0	0	0	0	0	0	0	0	0	0	0	0	0
34700	0	0	0	0	0	0.016129	0	0	0	0	0	0	0	0	0	0	0	0	0	0	0	0	0	0	0	0	0	0	0	0	0	0	0	0	0	0	0	0	0	0	0	0	0	0	0	0	0	0	0
34800	0	0	0	0	0	0	0	0	0	0	0	0	0	0	0	0	0	0	0	0	0	0	0	0	0	0	0	0	0	0	0	0	0	0	0	0	0	0	0	0	0	0	0	0	0	0	0	0	0
34900	0	0	0	0	0	0	0	0	0	0	0	0	0	0	0	0	0	0	0	0	0	0	0	0	0	0	0	0	0	0	0	0	0	0	0	0	0	0	0	0	0	0	0	0	0	0	0	0	0
35000	0	0	0	0	0	0	0	0	0	0	0	0	0	0	0	0	0	0	0	0	0	0	0	0	0	0	0	0	0	0	0	0	0	0	0	0	0	0	0	0	0	0	0	0	0	0	0	0	0
35100	0	0	0	0	0	0	0	0	0	0	0	0	0	0	0	0	0	0	0	0	0	0	0	0	0	0	0	0	0	0	0	0	0	0	0	0	0	0	0	0	0	0	0	0	0	0	0	0	0
35200	0	0	0	0	0	0	0	0	0	0	0	0	0	0	0	0	0	0	0	0	0	0	0	0	0	0	0	0	0	0	0	0	0	0	0	0	0	0	0	0	0	0	0	0	0	0	0	0	0
35300	0	0	0	0	0	0	0	0	0	0	0	0	0	0	0	0	0	0	0	0.0123457	0	0	0	0	0	0	0	0	0	0	0	0	0	0	0	0	0	0	0	0	0	0	0	0	0	0	0	0	0
35400	0	0	0	0	0.0133333	0	0	0	0	0	0	0	0	0	0	0	0	0	0	0	0	0	0	0	0	0	0	0	0	0	0	0	0	0	0	0	0	0	0	0	0	0	0	0	0	0	0	0	0
35500	0	0	0	0	0	0	0	0	0	0	0	0	0	0	0	0	0	0	0	0	0	0	0	0	0	0	0	0	0	0	0	0	0	0	0	0	0	0	0	0	0	0	0	0	0	0	0	0	0
35600	0	0	0	0	0	0	0	0	0	0	0	0	0	0	0	0	0	0	0	0	0	0	0	0	0	0	0	0	0	0	0	0	0	0	0	0	0	0	0	0	0	0	0	0	0	0	0	0	0
35700	0	0	0	0	0	0	0	0	0	0	0	0	0	0	0	0	0	0	0	0	0	0	0	0	0	0	0	0	0	0	0	0	0	0	0	0	0	0	0	0	0	0	0	0	0	0	0	0	0
35800	0	0	0	0	0	0	0	0	0	0	0	0	0	0	0	0	0	0	0	0	0	0	0	0	0	0	0	0	0	0	0.015873	0	0	0	0	0	0	0	0	0	0	0	0	0	0	0	0	0	0
35900	0	0	0	0	0	0	0	0	0	0	0	0	0	0	0	0	0	0	0	0	0	0	0	0	0	0	0	0	0	0	0	0	0	0	0	0	0	0	0	0	0	0	0	0	0	0	0	0	0
36000	0	0	0	0	0	0	0	0	0	0	0	0	0	0	0	0	0	0	0	0	0	0	0	0	0	0	0	0	0	0	0	0	0	0	0	0	0	0	0	0	0	0	0	0	0	0	0	0	0
36100	0	0	0	0	0.0133333	0	0	0	0	0	0	0	0	0	0	0	0	0	0	0	0	0	0	0	0	0	0	0	0	0	0	0	0	0	0	0	0	0	0	0	0	0	0	0	0	0	0	0	0
36200	0	0	0	0	0	0	0	0	0	0	0	0	0	0	0	0	0	0	0	0	0	0	0	0	0	0	0	0	0	0	0	0	0	0	0	0	0	0	0	0	0	0	0	0	0	0	0	0	0
36300	0	0	0	0	0	0	0	0	0	0	0	0	0	0	0	0	0	0	0	0	0	0	0	0	0	0	0	0	0	0	0	0	0	0	0	0	0	0	0	0	0	0	0	0	0	0	0	0	0
36400	0	0	0	0	0	0	0	0	0	0	0	0	0	0	0	0	0	0	0	0	0	0	0	0	0	0	0	0	0	0	0	0	0	0	0	0	0	0	0	0	0	0	0	0	0	0	0	0	0
36500	0	0	0	0	0	0	0	0	0	0	0	0	0	0	0	0	0	0	0	0	0	0	0	0	0	0	0	0	0	0	0	0	0	0	0	0	0.0126582	0	0	0	0	0	0	0	0	0	0	0	0
36600	0	0	0	0	0	0	0	0	0	0	0	0	0	0	0	0	0	0	0	0	0	0	0	0	0	0	0	0	0	0	0	0	0	0	0	0	0	0	0	0	0	0	0	0	0	0	0	0	0
36700	0	0	0	0	0	0	0	0	0	0	0	0.0133333	0	0	0	0	0	0	0	0	0	0	0	0	0	0	0	0	0	0	0	0	0	0	0	0	0	0	0	0	0	0	0	0	0	0	0	0	0
36800	0	0	0	0	0	0	0	0	0	0	0	0	0	0	0	0	0	0	0	0	0	0	0	0	0	0	0	0	0	0	0	0	0	0	0	0	0	0	0	0	0	0	0	0	0	0	0	0	0
36900	0	0	0	0	0	0	0	0	0	0	0	0	0	0	0	0	0	0	0	0	0	0	0	0	0	0	0	0	0	0	0	0	0	0	0	0	0	0	0	0	0	0	0	0	0	0	0	0	0
37000	0	0	0	0	0	0	0	0	0	0	0	0	0	0	0	0	0	0	0	0	0	0	0	0	0	0	0	0	0	0	0	0	0	0	0	0	0	0	0	0	0	0	0	0	0	0	0	0	0
37100	0	0	0	0	0	0	0	0	0	0	0	0	0	0	0	0	0	0	0	0	0	0	0	0	0	0	0	0	0	0	0	0	0	0	0	0	0	0	0	0	0	0	0	0	0	0	0	0	0
37200	0	0	0	0	0	0	0	0	0	0	0	0	0	0	0	0	0	0	0	0	0	0	0	0	0	0	0	0	0	0	0	0	0	0	0	0	0	0	0	0	0	0	0	0	0	0	0	0	0
37300	0	0	0	0	0	0	0	0	0	0	0	0	0	0	0	0	0	0	0	0	0	0	0	0	0	0	0	0	0	0	0	0	0	0	0	0	0	0	0	0	0	0	0	0	0	0	0	0	0
37400	0	0	0	0	0	0	0	0	0	0	0	0	0	0	0	0	0	0	0	0	0	0	0	0	0	0	0	0	0	0	0	0	0	0	0	0	0	0	0	0	0	0	0	0	0	0	0	0	0
37500	0	0	0	0	0	0	0	0	0	0	0	0	0	0	0	0	0	0	0	0	0	0	0	0	0	0	0	0	0	0	0	0	0	0	0	0	0	0	0	0	0	0	0	0	0	0	0	0	0
37600	0	0	0	0	0.0133333	0	0	0	0	0	0	0	0	0	0	0	0	0	0	0	0	0	0	0	0	0	0	0	0	0	0	0	0	0	0	0	0	0	0	0	0	0	0	0	0	0	0	0	0
37700	0	0	0	0	0	0	0	0	0	0	0	0	0	0	0	0	0	0	0	0	0	0	0	0	0	0	0	0	0	0	0	0	0	0	0	0	0	0	0	0	0	0	0	0	0	0	0	0	0
37800	0	0	0	0	0	0	0	0	0	0	0	0	0	0	0	0	0	0	0	0	0	0	0	0.011236	0	0	0	0	0	0	0	0	0	0	0	0	0	0	0	0	0	0	0	0	0	0	0	0	0
37900	0	0	0	0	0	0	0	0	0	0	0	0	0	0	0	0	0	0	0	0	0	0	0	0	0	0	0	0	0	0	0	0	0	0	0	0	0	0	0	0	0	0	0	0	0	0	0	0	0
38000	0	0	0	0	0	0	0	0	0	0	0	0	0	0	0	0	0	0	0	0	0	0	0	0	0	0	0	0	0	0	0	0	0	0	0	0	0	0	0	0	0	0	0	0	0	0	0	0	0
38100	0	0	0	0	0	0	0	0	0	0	0	0	0	0	0	0	0	0	0	0	0	0	0	0	0	0	0	0	0	0	0	0	0	0	0	0	0	0	0	0	0	0	0	0	0	0	0	0	0
38200	0	0	0	0	0	0	0	0	0	0	0	0	0	0	0	0	0	0	0	0	0	0	0	0	0	0	0	0	0	0	0	0	0	0	0	0	0	0	0	0	0	0	0	0	0	0	0	0	0
38300	0	0	0	0	0	0	0	0	0	0	0	0	0	0	0	0	0	0	0	0	0	0	0	0	0	0	0	0	0	0	0	0	0	0	0	0	0	0	0	0	0	0	0	0	0	0	0	0	0
38400	0	0	0	0	0	0	0	0	0	0	0	0	0	0	0	0	0	0	0	0	0	0	0	0	0	0	0	0	0	0	0	0	0	0	0	0	0	0	0	0	0.0135135	0	0	0	0	0	0	0	0
38500	0	0	0	0	0	0	0	0	0	0	0	0	0	0	0	0	0	0	0	0	0	0	0	0	0	0	0	0	0	0	0	0	0	0	0	0	0	0	0	0	0	0	0	0	0	0	0	0	0
38600	0	0	0	0	0	0	0	0	0	0	0	0	0	0	0	0	0	0	0	0	0	0	0	0	0	0	0	0	0	0	0	0	0	0	0	0	0	0	0	0	0	0	0	0	0	0	0	0	0
38700	0	0	0	0	0	0	0	0	0	0	0	0	0	0	0	0.0153846	0	0	0	0	0	0	0	0	0	0	0	0	0	0	0	0	0	0	0	0	0	0	0	0	0	0	0	0	0	0	0	0	0
38800	0	0	0	0	0	0	0	0	0	0	0	0	0	0	0	0	0	0	0	0	0	0	0	0	0	0	0	0	0	0	0	0	0	0	0	0	0	0	0	0	0	0	0	0	0	0	0	0	0
38900	0	0	0	0	0	0	0	0	0	0	0	0	0	0	0	0	0	0	0	0	0	0	0	0	0	0	0	0	0	0	0	0	0	0	0	0	0	0	0	0	0	0	0	0	0	0	0	0	0
39000	0	0	0	0	0	0	0	0	0	0	0	0	0	0	0	0	0	0	0	0	0	0	0	0	0	0	0	0	0	0	0	0	0	0	0	0	0	0	0	0	0	0	0	0	0	0	0	0	0
39100	0	0	0	0	0	0	0	0	0	0	0	0	0	0	0	0	0	0	0	0	0	0	0	0	0	0	0	0	0	0	0	0	0	0	0	0	0	0	0	0	0	0	0	0	0	0	0	0	0
39200	0	0	0	0	0	0	0	0	0	0	0	0	0	0	0	0	0	0	0	0	0	0	0	0	0	0	0	0	0	0	0	0	0	0	0	0	0	0	0	0	0	0	0	0	0	0	0	0	0
39300	0	0	0	0	0	0	0	0	0	0	0	0	0	0	0	0	0	0	0	0	0	0	0	0	0	0	0	0	0	0	0.015873	0	0	0	0	0	0	0	0	0	0	0	0	0	0	0	0	0	0
39400	0	0	0	0	0	0	0	0	0	0	0	0	0	0	0	0	0	0	0	0	0	0	0	0	0	0	0	0	0	0	0	0	0	0	0	0	0	0	0	0	0	0	0	0	0	0	0	0	0
39500	0	0	0	0	0	0	0	0	0	0	0	0	0	0	0	0	0	0	0	0	0	0	0	0	0	0	0	0	0	0	0	0	0	0	0	0	0	0	0	0	0	0	0	0	0	0	0	0	0
39600	0	0	0	0	0	0	0	0	0	0	0	0	0	0	0	0	0	0	0	0	0	0	0	0	0	0	0	0	0	0	0	0	0	0.015873	0	0	0	0	0	0	0	0	0	0	0	0	0	0	0
39700	0	0	0	0	0	0	0	0	0	0	0	0	0	0	0	0	0	0	0	0	0	0	0	0	0	0	0	0	0	0	0	0	0	0	0	0	0	0	0	0	0	0	0	0	0	0	0	0	0
39800	0	0	0	0	0	0	0	0	0	0	0	0	0	0	0	0	0	0	0	0	0	0	0	0	0	0	0	0	0	0	0	0	0	0	0	0	0	0	0	0	0	0	0	0	0	0	0	0	0
39900	0	0	0	0	0	0	0	0	0	0	0	0	0	0	0	0	0	0	0	0	0	0	0	0	0	0	0	0	0	0	0	0	0	0	0	0	0	0	0	0	0	0	0	0	0	0	0	0	0
40000	0	0	0	0	0	0	0	0	0	0	0	0	0	0	0	0	0	0	0	0	0	0	0	0	0	0	0	0	0	0	0	0	0	0	0	0	0	0	0	0	0	0	0	0	0	0	0	0	0
40100	0	0	0	0	0	0	0	0	0	0	0	0	0	0	0	0	0	0	0	0	0	0	0	0	0	0	0	0	0	0	0	0	0	0	0	0	0	0	0	0	0	0	0	0	0	0	0	0	0
40200	0	0	0	0	0	0	0	0	0	0	0	0	0	0	0	0	0	0	0	0	0	0	0	0	0	0	0	0	0	0	0	0	0	0	0	0	0	0	0	0	0	0	0	0	0	0	0	0	0
40300	0	0	0	0	0	0	0	0	0	0	0	0	0	0	0	0	0	0	0	0	0	0	0	0	0	0	0	0	0	0	0	0	0	0	0	0	0	0	0	0	0	0	0	0	0	0	0	0	0
40400	0	0	0	0	0	0	0	0	0	0	0	0	0	0	0	0	0	0	0	0	0	0	0	0	0	0	0	0	0	0	0	0	0	0	0	0	0	0	0	0	0	0	0	0	0	0	0	0	0
40500	0	0	0	0	0	0	0	0	0	0	0	0	0	0	0	0	0	0	0	0	0	0	0	0	0	0	0	0	0	0	0	0	0	0	0	0	0	0	0	0	0	0	0	0	0	0	0	0	0
40600	0	0	0	0	0	0	0	0	0	0	0	0	0	0	0	0	0	0	0	0	0	0	0	0	0	0	0	0	0	0	0	0	0	0	0	0	0	0	0	0	0	0	0	0	0	0	0	0	0
40700	0	0	0	0	0	0	0	0	0	0	0	0	0	0	0	0	0	0	0	0	0	0	0	0	0	0	0	0	0	0	0	0	0	0	0	0	0	0	0	0	0	0	0	0	0	0	0	0	0
40800	0	0	0	0	0	0	0	0	0	0	0	0	0	0	0	0	0	0	0	0	0	0	0	0	0	0	0	0	0	0	0	0	0	0.015873	0	0	0	0	0	0	0	0	0	0	0	0	0	0	0
40900	0	0	0	0	0	0	0	0	0	0	0	0	0	0	0	0	0	0	0	0	0	0	0	0	0	0	0	0	0	0	0	0	0	0	0	0	0	0	0	0	0	0	0	0	0	0	0	0	0
41000	0	0	0	0	0	0	0	0	0	0	0	0	0	0	0	0	0	0	0	0	0	0	0	0	0	0	0	0	0	0	0	0	0	0	0	0	0	0	0	0	0	0	0	0	0	0	0	0	0
41100	0	0	0	0	0	0	0	0	0	0	0	0	0	0	0	0	0	0	0	0	0	0	0	0	0	0	0	0	0	0	0	0	0	0.015873	0	0	0	0	0	0	0	0	0	0	0	0	0	0	0
41200	0	0	0	0	0	0	0	0	0	0	0	0	0	0	0	0	0	0	0	0	0	0	0	0	0	0	0	0	0	0	0	0	0	0	0	0	0	0	0	0	0	0	0	0	0	0	0	0	0
41300	0	0	0	0	0	0	0	0	0	0	0	0	0	0	0	0	0	0	0	0	0	0	0	0	0	0	0	0	0	0	0	0	0	0	0	0	0	0	0	0	0	0	0	0	0	0	0	0	0
41400	0	0	0	0	0	0	0	0	0	0	0	0	0	0	0	0	0	0	0	0	0	0	0	0	0	0	0	0	0	0	0	0	0	0	0	0	0	0	0	0	0	0	0	0	0	0	0	0	0
41500	0	0	0	0	0	0	0	0	0	0	0	0	0	0	0	0	0	0	0	0	0	0	0	0.011236	0	0	0	0	0	0	0	0	0	0	0	0	0	0	0	0	0	0	0	0	0	0	0	0	0
41600	0	0	0	0	0	0	0	0	0	0	0	0	0	0	0	0	0	0	0	0	0	0	0	0	0	0	0	0	0	0	0	0	0	0	0	0	0	0	0	0	0	0	0	0	0	0	0	0	0
41700	0	0	0	0	0	0	0	0	0	0	0	0	0	0	0	0	0	0	0	0	0	0	0	0	0	0	0	0	0	0	0	0	0	0	0	0	0	0	0	0	0	0	0	0	0	0	0	0	0
41800	0	0	0	0	0	0	0	0	0	0	0	0	0	0	0	0	0	0	0	0	0	0	0	0	0	0	0	0	0	0	0	0	0	0	0	0	0	0	0	0	0	0	0	0	0	0	0	0	0
41900	0	0	0	0	0	0	0	0	0	0	0	0	0	0	0	0	0	0	0	0	0	0	0	0	0	0	0	0	0	0	0	0	0	0	0	0	0	0	0	0	0	0	0	0	0	0	0	0	0
42000	0	0	0	0	0	0	0	0	0	0	0	0	0	0	0	0	0	0	0	0	0	0	0	0	0	0	0	0	0	0	0	0	0	0	0	0	0	0	0	0	0	0	0	0	0	0	0	0	0
42100	0	0	0	0	0	0	0	0	0	0	0	0	0	0	0	0	0	0	0	0	0	0	0	0	0	0	0	0	0	0	0	0	0	0	0	0	0	0	0	0	0	0	0	0	0	0	0	0	0
42200	0	0	0	0	0	0	0	0	0	0	0	0	0	0	0	0	0	0	0	0	0	0	0	0	0	0	0	0	0	0	0	0	0	0	0	0	0	0	0	0	0	0	0	0	0	0	0	0	0
42300	0	0	0	0	0	0	0	0	0	0	0	0	0	0	0	0	0	0	0	0	0	0	0	0	0	0	0	0	0	0	0	0	0	0	0	0	0	0	0	0	0	0	0	0	0	0	0	0	0
42400	0	0	0	0	0	0	0	0	0	0	0	0	0	0	0	0	0	0	0	0	0	0	0	0	0	0	0	0	0	0	0	0	0	0	0	0	0	0	0	0	0	0	0	0	0	0	0	0	0
42500	0	0	0	0	0	0	0	0	0	0	0	0	0	0	0	0	0	0	0	0	0	0	0	0	0	0	0	0	0	0	0	0	0	0	0	0	0	0	0	0	0	0	0	0	0	0	0	0	0
42600	0	0	0	0	0	0	0	0	0	0	0	0	0	0	0	0	0	0	0	0	0	0	0	0	0	0	0	0	0	0	0	0	0	0	0	0	0	0	0	0	0	0	0	0	0	0	0	0	0
42700	0	0	0	0	0	0	0	0	0	0	0	0	0	0	0	0	0	0	0	0	0	0	0	0	0	0	0	0	0	0	0	0	0	0	0	0	0	0	0	0	0	0	0	0	0	0	0	0	0
42800	0	0	0	0	0	0	0	0	0	0	0	0	0	0	0	0	0	0	0	0	0	0	0	0	0	0	0	0	0	0	0	0	0	0	0	0	0	0	0	0	0	0	0	0	0	0	0	0	0
42900	0	0	0	0	0	0	0	0	0	0	0	0	0.0120482	0	0	0	0	0	0	0	0	0	0	0	0	0	0	0	0	0	0	0	0	0	0	0	0	0	0	0	0	0	0	0	0	0	0	0	0
43000	0	0	0	0	0	0	0	0	0	0	0	0	0	0	0	0	0	0	0	0	0	0	0	0	0	0	0	0	0	0	0	0	0	0	0	0	0	0	0	0	0	0	0	0	0	0	0	0	0
43100	0	0	0	0	0	0	0	0	0	0	0	0	0	0	0	0	0	0	0	0	0	0	0	0	0	0	0	0	0	0	0	0	0	0	0	0	0	0	0	0	0	0	0	0	0	0	0	0	0
43200	0	0	0	0	0	0	0	0	0	0	0	0	0	0	0	0	0	0	0	0	0	0	0	0	0	0	0	0	0	0	0	0	0	0	0	0	0	0	0	0	0	0	0	0	0	0	0	0	0
43300	0	0	0	0	0	0	0	0	0	0	0	0	0	0	0	0	0	0	0	0	0	0	0	0	0	0	0	0	0	0	0	0	0	0	0	0	0	0	0	0	0	0	0	0	0	0	0	0	0
43400	0	0	0	0	0	0	0	0	0	0	0	0	0	0	0	0	0	0	0	0	0	0	0	0	0	0	0	0	0	0	0	0	0	0	0	0	0	0	0	0	0	0	0	0	0	0	0	0	0
43500	0	0	0	0	0	0	0	0	0	0	0	0	0	0	0	0	0	0	0	0	0	0	0	0	0	0	0	0	0	0	0	0	0	0	0	0	0	0	0	0	0	0	0	0	0	0	0	0	0
43600	0	0	0	0	0	0	0	0	0	0	0	0	0	0	0	0	0	0	0	0	0	0	0	0	0	0	0	0	0	0	0	0	0	0	0	0	0	0	0	0	0	0	0	0	0	0	0	0	0
43700	0	0	0	0	0	0	0	0	0	0	0	0	0	0	0	0	0	0	0	0	0	0	0	0	0	0	0	0	0	0	0	0	0	0	0	0	0	0	0	0	0	0	0	0	0	0	0	0	0
43800	0	0	0	0	0	0	0	0	0	0	0	0	0	0	0	0	0	0	0	0	0	0	0	0	0	0	0	0	0	0	0	0	0	0	0	0	0	0	0	0	0	0	0	0	0	0	0	0	0
43900	0	0	0	0	0	0	0	0	0	0	0	0	0	0	0	0	0	0	0	0	0	0	0	0	0	0	0	0	0	0	0	0	0	0	0	0	0	0	0	0	0	0	0	0	0	0	0	0	0
44000	0	0	0	0	0	0	0	0	0	0	0	0	0	0	0	0	0	0	0	0	0	0	0	0	0	0	0	0	0	0	0	0	0	0	0	0	0	0	0	0	0	0	0	0	0	0	0	0	0
44100	0	0	0	0	0	0	0	0	0	0	0	0	0	0	0	0	0	0	0	0	0	0	0	0	0	0	0	0	0	0	0	0	0	0	0	0	0	0	0	0	0	0	0	0	0	0	0	0	0
44200	0	0	0	0	0	0	0	0	0	0	0	0	0	0	0	0	0	0	0	0	0	0	0	0	0	0	0	0	0	0	0	0	0	0	0	0	0	0	0	0	0	0	0	0	0	0	0	0	0
44300	0	0	0	0	0	0	0	0	0	0	0	0	0	0	0	0	0	0	0	0	0	0	0	0	0	0	0	0	0	0	0	0	0	0	0	0	0	0	0	0	0	0.015873	0	0	0	0	0	0	0
44400	0	0	0	0	0	0	0	0	0	0	0	0	0	0	0	0	0	0	0	0	0	0	0	0	0	0	0	0	0	0	0	0	0	0	0	0	0	0	0	0	0	0	0	0	0	0	0	0	0
44500	0	0	0	0	0	0	0	0	0	0	0	0	0	0	0	0	0	0	0	0	0	0	0	0	0	0	0	0	0	0	0	0	0	0	0	0	0	0	0	0	0	0	0	0	0	0	0	0	0
44600	0	0	0	0	0	0	0	0	0	0	0	0	0	0	0	0	0	0	0	0	0	0	0	0	0	0	0	0	0	0	0	0	0	0	0	0	0	0	0	0	0	0	0	0	0	0	0	0	0
44700	0	0	0	0	0	0	0	0	0	0	0	0	0	0	0	0	0	0	0	0	0	0	0	0	0	0	0	0	0	0	0	0	0	0	0	0	0	0	0	0	0	0	0	0	0	0	0	0	0
44800	0	0	0	0	0	0	0	0	0	0	0	0	0	0	0	0	0	0	0	0	0	0	0	0	0	0	0	0	0	0	0	0	0	0	0	0	0	0	0	0	0	0	0	0	0	0	0	0	0
44900	0	0	0	0	0	0	0	0	0	0	0	0	0	0	0	0	0	0	0	0	0	0	0	0	0	0	0	0	0	0	0	0	0	0	0	0	0	0	0	0	0	0	0	0	0	0	0	0	0
45000	0	0	0	0	0	0	0	0	0	0	0	0	0	0	0	0	0	0	0	0	0	0	0	0	0	0	0	0	0	0	0	0	0	0	0	0	0	0	0	0	0	0	0	0	0	0	0	0	0
45100	0	0	0	0	0	0	0	0	0	0	0	0	0	0	0	0	0	0	0	0	0	0	0	0	0	0	0	0	0	0	0	0	0	0	0	0	0	0	0	0	0	0	0	0	0	0	0	0	0
45200	0	0	0	0	0	0	0	0	0	0	0	0	0	0	0	0	0	0	0	0	0	0	0	0	0	0	0	0	0	0	0	0	0	0	0	0	0	0	0	0	0	0	0	0	0	0	0	0	0
45300	0	0	0	0	0	0	0	0	0	0	0	0	0	0	0	0	0	0	0	0	0	0	0	0	0	0	0	0	0	0	0	0	0	0	0	0	0	0	0	0	0	0	0	0	0	0	0	0	0
45400	0	0	0	0	0	0	0	0	0	0	0	0	0	0	0	0	0	0	0	0	0	0	0	0	0	0	0	0	0	0	0	0	0	0	0	0	0	0	0	0	0	0	0	0	0	0	0	0	0
45500	0	0	0	0	0	0	0	0	0	0	0	0.0133333	0	0	0	0	0	0	0	0	0	0	0	0	0	0	0	0	0	0	0	0	0	0	0	0	0	0	0	0	0	0	0	0	0	0	0	0	0
45600	0	0	0	0	0	0	0	0	0	0	0	0	0	0	0	0	0	0	0	0	0	0	0	0	0	0	0	0	0	0	0	0	0	0	0	0	0	0	0	0	0	0	0	0	0	0	0	0	0
45700	0	0	0	0	0	0	0	0	0	0	0	0	0	0	0	0	0	0	0	0	0	0	0	0	0	0	0	0	0	0	0	0	0	0	0	0	0	0	0	0	0	0	0	0	0	0	0	0	0
45800	0	0	0	0	0	0	0	0	0	0	0	0	0	0	0	0	0	0	0	0	0	0	0	0	0	0	0	0	0	0	0	0	0	0	0	0	0	0	0	0	0	0	0	0	0	0	0	0	0
45900	0	0	0	0	0	0	0	0	0	0	0	0	0	0	0	0	0	0	0	0	0	0	0	0	0	0	0	0	0	0	0	0	0	0	0	0	0	0	0	0	0	0	0	0	0	0	0	0	0
46000	0	0	0	0	0	0	0	0	0	0	0	0	0	0	0	0	0	0	0	0	0	0	0	0	0	0	0	0	0	0	0	0	0	0	0	0	0	0	0	0	0	0	0	0	0	0	0	0	0
46100	0	0	0	0	0	0	0	0	0	0	0	0	0	0	0	0	0	0	0	0	0	0	0	0	0	0	0	0	0	0	0	0	0	0	0	0	0	0	0	0	0	0	0	0	0	0	0	0	0
46200	0	0	0	0	0	0	0	0	0	0	0	0	0	0	0	0	0	0	0	0	0	0	0	0	0	0	0	0	0	0	0	0	0	0	0	0	0	0	0	0	0	0	0	0	0	0	0	0	0
46300	0	0	0	0	0	0	0	0	0	0	0	0	0	0	0	0	0	0	0	0	0	0	0	0	0	0	0	0	0	0	0	0	0	0	0	0	0	0	0	0	0	0	0	0	0	0	0	0	0
46400	0	0	0	0	0	0	0	0	0	0	0	0	0	0	0	0	0	0	0	0	0	0	0	0	0	0	0	0	0	0	0	0	0	0	0	0	0	0	0	0	0	0	0	0	0	0	0	0	0
46500	0	0	0	0	0	0	0	0	0	0	0	0	0	0	0	0	0	0	0	0	0	0	0	0	0	0	0	0	0	0	0	0	0	0	0	0	0	0	0.01	0	0	0	0	0	0	0	0	0	0
46600	0	0	0	0	0	0	0	0	0	0	0	0	0	0	0	0	0	0	0	0	0	0	0	0	0	0	0	0	0	0	0	0	0	0	0	0	0	0	0	0	0	0	0	0	0	0	0	0	0
46700	0	0	0	0	0	0	0	0	0	0	0	0	0	0	0	0	0	0	0	0	0	0	0	0	0	0	0	0	0	0	0	0	0	0	0	0	0	0	0	0	0	0	0	0	0	0	0	0	0
46800	0	0	0	0	0	0	0	0	0	0	0	0	0	0	0	0	0	0	0	0	0	0	0	0	0	0	0	0	0	0	0	0	0	0	0	0	0	0	0	0	0	0	0	0	0	0	0	0	0
46900	0	0	0	0	0	0	0	0	0	0	0	0	0	0	0	0	0	0	0	0	0	0	0	0	0	0	0	0	0	0	0	0	0	0	0	0	0	0	0	0	0	0	0	0	0	0	0	0	0
47000	0	0	0	0	0	0	0	0	0	0	0	0	0	0	0	0	0	0	0	0	0	0	0	0	0	0	0	0	0	0	0	0	0	0	0	0	0	0	0	0	0	0	0	0	0	0	0	0	0
47100	0	0	0	0	0	0	0	0	0	0	0	0	0	0	0	0	0	0	0	0	0	0	0	0	0	0	0	0	0	0	0	0	0	0	0	0	0	0	0	0	0	0	0	0	0	0	0	0	0
47200	0	0	0	0	0	0	0	0	0	0	0	0	0	0	0	0	0	0	0	0	0	0	0	0	0	0	0	0	0	0	0	0	0	0	0	0	0	0	0	0	0	0	0	0	0	0	0	0	0
47300	0	0	0	0	0	0	0	0	0	0	0	0	0	0	0	0	0	0	0	0	0	0	0	0	0	0	0	0	0	0	0	0	0	0	0	0	0	0	0	0	0	0	0	0	0	0	0	0	0
47400	0	0	0	0	0	0	0	0	0	0	0	0	0	0	0	0	0	0	0	0	0	0	0	0	0	0	0	0	0	0	0	0	0	0	0	0	0	0	0	0	0	0	0	0	0	0	0	0	0
47500	0	0	0	0	0	0	0	0	0	0	0	0	0	0	0	0	0	0	0	0	0	0	0	0	0	0	0	0	0	0	0	0	0	0	0	0	0	0	0	0	0	0	0	0	0	0	0	0	0
47600	0	0	0	0	0	0	0	0	0	0	0	0	0	0	0	0	0	0	0	0	0	0	0	0	0	0	0	0	0	0	0	0	0	0	0	0	0	0	0	0	0	0	0	0	0	0	0	0	0
47700	0	0	0	0	0	0	0	0	0	0	0	0	0	0	0	0	0	0	0	0	0	0	0	0	0	0	0	0	0	0	0	0	0	0	0	0	0	0	0	0	0	0	0	0	0	0	0	0	0
47800	0	0	0	0	0	0	0	0	0	0	0	0	0	0	0	0	0	0	0	0	0	0	0	0	0	0	0	0	0	0	0	0	0	0	0	0	0	0	0	0	0	0	0	0	0	0	0	0	0
47900	0	0	0	0	0	0	0	0	0	0	0	0	0	0	0	0	0	0	0	0	0	0	0	0	0	0	0	0	0	0	0	0	0	0	0	0	0	0	0	0	0	0	0	0	0	0	0	0	0
48000	0	0	0	0	0	0	0	0	0	0	0	0	0	0	0	0	0	0	0	0	0	0	0	0	0	0	0	0	0	0	0	0	0	0	0	0	0	0	0	0	0	0	0	0	0	0	0	0	0
48100	0	0	0	0	0	0	0	0	0	0	0	0	0	0	0	0	0	0	0	0	0	0	0	0	0	0	0	0	0	0	0	0	0	0	0	0	0	0	0	0	0	0	0	0	0	0	0	0	0
48200	0	0	0	0	0	0	0	0	0	0	0	0	0	0	0	0	0	0	0	0	0	0	0	0	0	0	0	0	0	0	0	0	0	0	0	0	0	0	0	0	0	0	0	0	0	0	0	0	0
48300	0	0	0	0	0	0	0	0	0	0	0	0	0	0	0	0	0	0	0	0	0	0	0	0	0	0	0	0	0	0	0	0	0	0	0	0	0	0	0	0	0	0	0	0	0	0	0	0	0
48400	0	0	0	0	0	0	0	0	0	0	0	0	0	0	0	0	0	0	0	0	0	0	0	0	0	0	0	0	0	0	0	0	0	0	0	0	0	0	0	0	0	0	0	0	0	0	0	0	0
48500	0	0	0	0	0	0	0	0	0	0	0	0	0	0	0	0	0	0	0	0	0	0	0	0	0	0	0	0	0	0	0	0	0	0	0	0	0	0	0	0	0	0	0	0	0	0	0	0	0
48600	0	0	0	0	0	0	0	0	0	0	0	0	0	0	0	0	0	0	0	0	0	0	0	0	0	0	0	0	0	0	0	0	0	0	0	0	0	0	0	0	0	0	0	0	0	0	0	0	0
48700	0	0	0	0	0	0	0	0	0	0	0	0	0	0	0	0	0	0	0	0	0	0	0	0	0	0	0	0	0	0	0	0	0	0	0	0	0	0	0	0	0	0	0	0	0	0	0	0	0
48800	0	0	0	0	0	0	0	0	0	0	0	0	0	0	0	0	0	0	0	0	0	0	0	0	0	0	0	0	0	0	0	0	0	0	0	0	0	0	0	0	0	0	0	0	0	0	0	0	0
48900	0	0	0	0	0	0	0	0	0	0	0	0	0	0	0	0	0	0	0	0	0	0	0	0	0	0	0	0	0	0	0	0	0	0	0	0	0	0	0	0	0	0	0	0	0	0	0	0	0
49000	0	0	0	0	0	0	0	0	0	0	0	0	0	0	0	0	0	0	0	0	0	0	0	0	0	0	0	0	0	0	0	0	0	0	0	0	0	0	0	0	0	0	0	0	0	0	0	0	0
49100	0	0	0	0	0	0	0	0	0	0	0	0	0	0	0	0	0	0	0	0	0	0	0	0	0	0	0	0	0	0	0	0	0	0	0	0	0	0	0	0	0	0	0	0	0	0	0	0	0
49200	0	0	0	0	0	0	0	0	0	0	0	0	0	0	0	0	0	0	0	0	0	0	0	0	0	0	0	0	0	0	0	0	0	0	0	0	0	0	0	0	0	0	0	0	0	0	0	0	0
49300	0	0	0	0	0	0	0	0	0	0	0	0	0	0	0	0	0	0	0	0	0	0	0	0	0	0	0	0	0	0	0	0	0	0	0	0	0	0	0	0	0	0	0	0	0	0	0	0	0
49400	0	0	0	0	0	0	0	0	0	0	0	0	0	0	0	0	0	0	0	0	0	0	0	0	0	0	0	0	0	0	0	0	0	0	0	0	0	0	0	0	0	0	0	0	0	0	0	0	0
49500	0	0	0	0	0	0	0	0	0	0	0	0	0	0	0	0	0	0	0	0	0	0	0	0	0	0	0	0	0	0	0	0	0	0	0	0	0	0	0	0	0	0	0	0	0	0	0	0	0
49600	0	0	0	0	0	0	0	0	0	0	0	0	0	0	0	0	0	0	0	0	0	0	0	0	0	0	0	0	0	0	0	0	0	0	0	0	0	0	0	0	0	0	0	0	0	0	0	0	0
49700	0	0	0	0	0	0	0	0	0	0	0	0	0	0	0	0	0	0	0	0	0	0	0	0	0	0	0	0	0	0	0	0	0	0	0	0	0	0	0	0	0	0	0	0	0	0	0	0	0
49800	0	0	0	0	0	0	0	0	0	0	0	0	0	0	0	0	0	0	0	0	0	0	0	0	0	0	0	0	0	0	0	0	0	0	0	0	0	0	0	0	0	0	0	0	0	0	0	0	0
49900	0	0	0	0	0	0	0	0	0	0	0	0	0	0	0	0	0	0	0	0	0	0	0	0	0	0	0	0	0	0	0	0	0	0	0	0	0	0	0	0	0	0	0	0	0	0	0	0	0
50000	0	0	0	0	0	0	0	0	0	0	0	0	0	0	0	0	0	0	0	0	0	0	0	0	0	0	0	0	0	0	0	0	0	0	0	0	0	0	0	0	0	0	0	0	0	0	0	0	0
50100	0	0	0	0	0	0	0	0	0	0	0	0	0	0	0	0	0	0	0	0	0	0	0	0	0	0	0	0	0	0	0	0	0	0	0	0	0	0	0	0	0	0	0	0	0	0	0	0	0
50200	0	0	0	0	0	0	0	0	0	0	0	0	0	0	0	0	0	0	0	0	0	0	0	0	0	0	0	0	0	0	0	0	0	0	0	0	0	0	0	0	0	0	0	0	0	0	0	0	0
50300	0	0	0	0	0	0	0	0	0	0	0	0	0	0	0	0	0	0	0	0	0	0	0	0	0	0	0	0	0	0	0	0	0	0	0	0	0	0	0	0	0	0	0	0	0	0	0	0	0
50400	0	0	0	0	0	0	0	0	0	0	0	0	0	0	0	0	0	0	0	0	0	0	0	0	0	0	0	0	0	0	0	0	0	0	0	0	0	0	0	0	0	0	0	0	0	0	0	0	0
50500	0	0	0	0	0	0	0	0	0	0	0	0	0	0	0	0	0	0	0	0	0	0	0	0	0	0	0	0	0	0	0	0	0	0	0	0	0	0	0	0	0	0	0	0	0	0	0	0	0
50600	0	0	0	0	0	0	0	0	0	0	0	0	0	0	0	0	0	0	0	0	0	0	0	0	0	0	0	0	0	0	0	0	0	0	0	0	0	0	0	0	0	0	0	0	0	0	0	0	0
50700	0	0	0	0	0	0	0	0	0	0	0	0	0	0	0	0	0	0	0	0	0	0	0	0	0	0	0	0	0	0	0	0	0	0	0	0	0	0	0	0	0	0	0	0	0	0	0	0	0
50800	0	0	0	0	0	0	0	0	0	0	0	0	0	0	0	0	0	0	0	0	0	0	0	0	0	0	0	0	0	0	0	0	0	0	0	0	0	0	0	0	0	0	0	0	0	0	0	0	0
50900	0	0	0	0	0	0	0	0	0	0	0	0	0	0	0	0	0	0	0	0	0	0	0	0	0	0	0	0	0	0	0	0	0	0	0	0	0	0	0	0	0	0	0	0	0	0	0	0	0
51000	0	0	0	0	0	0	0	0	0	0	0	0	0	0	0	0	0	0	0	0	0	0	0	0	0	0	0	0	0	0	0	0	0	0	0	0	0	0	0	0	0	0	0	0	0	0	0	0	0
51100	0	0	0	0	0	0	0	0	0	0	0	0	0	0	0	0	0	0	0	0	0	0	0	0	0	0	0	0	0	0	0	0	0	0	0	0	0	0	0	0	0	0	0	0	0	0	0	0	0
51200	0	0	0	0	0	0	0	0	0	0	0	0	0	0	0	0	0	0	0	0	0	0	0	0	0	0	0	0	0	0	0	0	0	0	0	0	0	0	0	0	0	0	0	0	0	0	0	0	0
51300	0	0	0	0	0	0	0	0	0	0	0	0	0	0	0	0	0	0	0	0	0	0	0	0	0	0	0	0	0	0	0	0	0	0	0	0	0	0	0	0	0	0	0	0	0	0	0	0	0
51400	0	0	0	0	0	0	0	0	0	0	0	0	0	0	0	0	0	0	0	0	0	0	0	0	0	0	0	0	0	0	0	0	0	0	0	0	0	0	0	0	0	0	0	0	0	0	0	0	0
51500	0	0	0	0	0	0	0	0	0	0	0	0	0	0	0	0	0	0	0	0	0	0	0	0	0	0	0	0	0	0	0	0	0	0	0	0	0	0	0	0	0	0	0	0	0	0	0	0	0
51600	0	0	0	0	0	0	0	0	0	0	0	0	0	0	0	0	0	0	0	0	0	0	0	0	0	0	0	0	0	0	0	0	0	0	0	0	0	0	0	0	0	0	0	0	0	0	0	0	0
51700	0	0	0	0	0	0	0	0	0	0	0	0	0	0	0	0	0	0	0	0	0	0	0	0	0	0	0	0	0	0	0	0	0	0	0	0	0	0	0	0	0	0	0	0	0	0	0	0	0
51800	0	0	0	0	0	0	0	0	0	0	0	0	0	0	0	0	0	0	0	0	0	0	0	0	0	0	0	0	0	0	0	0	0	0	0	0	0	0	0	0	0	0	0	0	0	0	0	0	0
51900	0	0	0	0	0	0	0	0	0	0	0	0	0	0	0	0	0	0	0	0	0	0	0	0	0	0	0	0	0	0	0	0	0	0	0	0	0	0	0	0	0	0	0	0	0	0	0	0	0
52000	0	0	0	0	0	0	0	0	0	0	0	0	0	0	0	0	0	0	0	0	0	0	0	0	0	0	0	0	0	0	0	0	0	0	0	0	0	0	0	0	0	0	0	0	0	0	0	0	0
52100	0	0	0	0	0	0	0	0	0	0	0	0	0	0	0	0	0	0	0	0	0	0	0	0	0	0	0	0	0	0	0	0	0	0	0	0	0	0	0	0	0	0	0	0	0	0	0	0	0
52200	0	0	0	0	0	0	0	0	0	0	0	0	0	0	0	0	0	0	0	0	0	0	0	0	0	0	0	0	0	0	0	0	0	0	0	0	0	0	0	0	0	0	0	0	0	0	0	0	0
52300	0	0	0	0	0	0	0	0	0	0	0	0	0	0	0	0	0	0	0	0	0	0	0	0	0	0	0	0	0	0	0	0	0	0	0	0	0	0	0	0	0	0	0	0	0	0	0	0	0
52400	0	0	0	0	0	0	0	0	0	0	0	0	0	0	0	0	0	0	0	0	0	0	0	0	0	0	0	0	0	0	0	0	0	0	0	0	0	0	0	0	0	0	0	0	0	0	0	0	0
52500	0	0	0	0	0	0	0	0	0	0	0	0	0	0	0	0	0	0	0	0	0	0	0	0	0	0	0	0	0	0	0	0	0	0	0	0	0	0	0	0	0	0	0	0	0	0	0	0	0
52600	0	0	0	0	0	0	0	0	0	0	0	0	0	0	0	0	0	0	0	0	0	0	0	0	0	0	0	0	0	0	0	0	0	0	0	0	0	0	0	0	0	0	0	0	0	0	0	0	0
52700	0	0	0	0	0	0	0	0	0	0	0	0	0	0	0	0	0	0	0	0	0	0	0	0	0	0	0	0	0	0	0	0	0	0	0	0	0	0	0	0	0	0	0	0	0	0	0	0	0
52800	0	0	0	0	0	0	0	0	0	0	0	0	0	0	0	0	0	0	0	0	0	0	0	0	0	0	0	0	0	0	0	0	0	0	0	0	0	0	0	0	0	0	0	0	0	0	0	0	0
52900	0	0	0	0	0	0	0	0	0	0	0	0	0	0	0	0	0	0	0	0	0	0	0	0	0	0	0	0	0	0	0	0	0	0	0	0	0	0	0	0	0	0	0	0	0	0	0	0	0
53000	0	0	0	0	0	0	0	0	0	0	0	0	0	0	0	0	0	0	0	0	0	0	0	0	0	0	0	0	0	0	0	0	0	0	0	0	0	0	0	0	0	0	0	0	0	0	0	0	0
53100	0	0	0	0	0	0	0	0	0	0	0	0	0	0	0	0	0	0	0	0	0	0	0	0	0	0	0	0	0	0	0	0	0	0	0	0	0	0	0	0	0	0	0	0	0	0	0	0	0
53200	0	0	0	0	0	0	0	0	0	0	0	0	0	0	0	0	0	0	0	0	0	0	0	0	0	0	0	0	0	0	0	0	0	0	0	0	0	0	0	0	0	0	0	0	0	0	0	0	0
53300	0	0	0	0	0	0	0	0	0	0	0	0	0	0	0	0	0	0	0	0	0	0	0	0	0	0	0	0	0	0	0	0	0	0	0	0	0	0	0	0	0	0	0	0	0	0	0	0	0
53400	0	0	0	0	0	0	0	0	0	0	0	0	0	0	0	0	0	0	0	0	0	0	0	0	0	0	0	0	0	0	0	0	0	0	0	0	0	0	0	0	0	0	0	0	0	0	0	0	0
53500	0	0	0	0	0	0	0	0	0	0	0	0	0	0	0	0	0	0	0	0	0	0	0	0	0	0	0	0	0	0	0	0	0	0	0	0	0	0	0	0	0	0	0	0	0	0	0	0	0
53600	0	0	0	0	0	0	0	0	0	0	0	0	0	0	0	0	0	0	0	0	0	0	0	0	0	0	0	0	0	0	0	0	0	0	0	0	0	0	0	0	0	0	0	0	0	0	0	0	0
53700	0	0	0	0	0	0	0	0	0	0	0	0	0	0	0	0	0	0	0	0	0	0	0	0	0	0	0	0	0	0	0	0	0	0	0	0	0	0	0	0	0	0	0	0	0	0	0	0	0
53800	0	0	0	0	0	0	0	0	0	0	0	0	0	0	0	0	0	0	0	0	0	0	0	0	0	0	0	0	0	0	0	0	0	0	0	0	0	0	0	0	0	0	0	0	0	0	0	0	0
53900	0	0	0	0	0	0	0	0	0	0	0	0	0	0	0	0	0	0	0	0	0	0	0	0	0	0	0	0	0	0	0	0	0	0	0	0	0	0	0	0	0	0	0	0	0	0	0	0	0
54000	0	0	0	0	0	0	0	0	0	0	0	0	0	0	0	0	0	0	0	0	0	0	0	0	0	0	0	0	0	0	0	0	0	0	0	0	0	0	0	0	0	0	0	0	0	0	0	0	0
54100	0	0	0	0	0	0	0	0	0	0	0	0	0	0	0	0	0	0	0	0	0	0	0	0	0	0	0	0	0	0	0	0	0	0	0	0	0	0	0	0	0	0	0	0	0	0	0	0	0
54200	0	0	0	0	0	0	0	0	0	0	0	0	0	0	0	0	0	0	0	0	0	0	0	0	0	0	0	0	0	0	0	0	0	0	0	0	0	0	0	0	0	0	0	0	0	0	0	0	0
54300	0	0	0	0	0	0	0	0	0	0	0	0	0	0	0	0	0	0	0	0	0	0	0	0	0	0	0	0	0	0	0	0	0	0	0	0	0	0	0	0	0	0	0	0	0	0	0	0	0
54400	0	0	0	0	0	0	0	0	0	0	0	0	0	0	0	0	0	0	0	0	0	0	0	0	0	0	0	0	0	0	0	0	0	0	0	0	0	0	0	0	0	0	0	0	0	0	0	0	0
54500	0	0	0	0	0	0	0	0	0	0	0	0	0	0	0	0	0	0	0	0	0	0	0	0	0	0	0	0	0	0	0	0	0	0	0	0	0	0	0	0	0	0	0	0	0	0	0	0	0
54600	0	0	0	0	0	0	0	0	0	0	0	0	0	0	0	0	0	0	0	0	0	0	0	0	0	0	0	0	0	0	0	0	0	0	0	0	0	0	0	0	0	0	0	0	0	0	0	0	0
54700	0	0	0	0	0	0	0	0	0	0	0	0	0	0	0	0	0	0	0	0	0	0	0	0	0	0	0	0	0	0	0	0	0	0	0	0	0	0	0	0	0	0	0	0	0	0	0	0	0
54800	0	0	0	0	0	0	0	0	0	0	0	0	0	0	0	0	0	0	0	0	0	0	0	0	0	0	0	0	0	0	0	0	0	0	0	0	0	0	0	0	0	0	0	0	0	0	0	0	0
54900	0	0	0	0	0	0	0	0	0	0	0	0	0	0	0	0	0	0	0	0	0	0	0	0	0	0	0	0	0	0	0	0	0	0	0	0	0	0	0	0	0	0	0	0	0	0	0	0	0
55000	0	0	0	0	0	0	0	0	0	0	0	0	0	0	0	0	0	0	0	0	0	0	0	0	0	0	0	0	0	0	0	0	0	0	0	0	0	0	0	0	0	0	0	0	0	0	0	0	0
55100	0	0	0	0	0	0	0	0	0	0	0	0	0	0	0	0	0	0	0	0	0	0	0	0	0	0	0	0	0	0	0	0	0	0	0	0	0	0	0	0	0	0	0	0	0	0	0	0	0
55200	0	0	0	0	0	0	0	0	0	0	0	0	0	0	0	0	0	0	0	0	0	0	0	0	0	0	0	0	0	0	0	0	0	0	0	0	0	0	0	0	0	0	0	0	0	0	0	0	0
55300	0	0	0	0	0	0	0	0	0	0	0	0	0	0	0	0	0	0	0	0	0	0	0	0	0	0	0	0	0	0	0	0	0	0	0	0	0	0	0	0	0	0	0	0	0	0	0	0	0
55400	0	0	0	0	0	0	0	0	0	0	0	0	0	0	0	0	0	0	0	0	0	0	0	0	0	0	0	0	0	0	0	0	0	0	0	0	0	0	0	0	0	0	0	0	0	0	0	0	0
55500	0	0	0	0	0	0	0	0	0	0	0	0	0	0	0	0	0	0	0	0	0	0	0	0	0	0	0	0	0	0	0	0	0	0	0	0	0	0	0	0	0	0	0	0	0	0	0	0	0
55600	0	0	0	0	0	0	0	0	0	0	0	0	0	0	0	0	0	0	0	0	0	0	0	0	0	0	0	0	0	0	0	0	0	0	0	0	0	0	0	0	0	0	0	0	0	0	0	0	0
55700	0	0	0	0	0	0	0	0	0	0	0	0	0	0	0	0	0	0	0	0	0	0	0	0	0	0	0	0	0	0	0	0	0	0	0	0	0	0	0	0	0	0	0	0	0	0	0	0	0
55800	0	0	0	0	0	0	0	0	0	0	0	0	0	0	0	0	0	0	0	0	0	0	0	0	0	0	0	0	0	0	0	0	0	0	0	0	0	0	0	0	0	0	0	0	0	0	0	0	0
55900	0	0	0	0	0	0	0	0	0	0	0	0	0	0	0	0	0	0	0	0	0	0	0	0	0	0	0	0	0	0	0	0	0	0	0	0	0	0	0	0	0	0	0	0	0	0	0	0	0
56000	0	0	0	0	0	0	0	0	0	0	0	0	0	0	0	0	0	0	0	0	0	0	0	0	0	0	0	0	0	0	0	0	0	0	0	0	0	0	0	0	0	0	0	0	0	0	0	0	0
56100	0	0	0	0	0	0	0	0	0	0	0	0	0	0	0	0	0	0	0	0	0	0	0	0	0	0	0	0	0	0	0	0	0	0	0	0	0	0	0	0	0	0	0	0	0	0	0	0	0
56200	0	0	0	0	0	0	0	0	0	0	0	0	0	0	0	0	0	0	0	0	0	0	0	0	0	0	0	0	0	0	0	0	0	0	0	0	0	0	0	0	0	0	0	0	0	0	0	0	0
56300	0	0	0	0	0	0	0	0	0	0	0	0	0	0	0	0	0	0	0	0	0	0	0	0	0	0	0	0	0	0	0	0	0	0	0	0	0	0	0	0	0	0	0	0	0	0	0	0	0
56400	0	0	0	0	0	0	0	0	0	0	0	0	0	0	0	0	0	0	0	0	0	0	0	0	0	0	0	0	0	0	0	0	0	0	0	0	0	0	0	0	0	0	0	0	0	0	0	0	0
56500	0	0	0	0	0	0	0	0	0	0	0	0	0	0	0	0	0	0	0	0	0	0	0	0	0	0	0	0	0	0	0	0	0	0	0	0	0	0	0	0	0	0	0	0	0	0	0	0	0
56600	0	0	0	0	0	0	0	0	0	0	0	0	0	0	0	0	0	0	0	0	0	0	0	0	0	0	0	0	0	0	0	0	0	0	0	0	0	0	0	0	0	0	0	0	0	0	0	0	0
56700	0	0	0	0	0	0	0	0	0	0	0	0	0	0	0	0	0	0	0	0	0	0	0	0	0	0	0	0	0	0	0	0	0	0	0	0	0	0	0	0	0	0	0	0	0	0	0	0	0
56800	0	0	0	0	0	0	0	0	0	0	0	0	0	0	0	0	0	0	0	0	0	0	0	0	0	0	0	0	0	0	0	0	0	0	0	0	0	0	0	0	0	0	0	0	0	0	0	0	0
56900	0	0	0	0	0	0	0	0	0	0	0	0	0	0	0	0	0	0	0	0	0	0	0	0	0	0	0	0	0	0	0	0	0	0	0	0	0	0	0	0	0	0	0	0	0	0	0	0	0
57000	0	0	0	0	0	0	0	0	0	0	0	0	0	0	0	0	0	0	0	0	0	0	0	0	0	0	0	0	0	0	0	0	0	0	0	0	0	0	0	0	0	0	0	0	0	0	0	0	0
57100	0	0	0	0	0	0	0	0	0	0	0	0	0	0	0	0	0	0	0	0	0	0	0	0	0	0	0	0	0	0	0	0	0	0	0	0	0	0	0	0	0	0	0	0	0	0	0	0	0
57200	0	0	0	0	0	0	0	0	0	0	0	0	0	0	0	0	0	0	0	0	0	0	0	0	0	0	0	0	0	0	0	0	0	0	0	0	0	0	0	0	0	0	0	0	0	0	0	0	0
57300	0	0	0	0	0	0	0	0	0	0	0	0	0	0	0	0	0	0	0	0	0	0	0	0	0	0	0	0	0	0	0	0	0	0	0	0	0	0	0	0	0	0	0	0	0	0	0	0	0
57400	0	0	0	0	0	0	0	0	0	0	0	0	0	0	0	0	0	0	0	0	0	0	0	0	0	0	0	0	0	0	0	0	0	0	0	0	0	0	0	0	0	0	0	0	0	0	0	0	0
57500	0	0	0	0	0	0	0	0	0	0	0	0	0	0	0	0	0	0	0	0	0	0	0	0	0	0	0	0	0	0	0	0	0	0	0	0	0	0	0	0	0	0	0	0	0	0	0	0	0
57600	0	0	0	0	0	0	0	0	0	0	0	0	0	0	0	0	0	0	0	0	0	0	0	0	0	0	0	0	0	0	0	0	0	0	0	0	0	0	0	0	0	0	0	0	0	0	0	0	0
57700	0	0	0	0	0	0	0	0	0	0	0	0	0	0	0	0	0	0	0	0	0	0	0	0	0	0	0	0	0	0	0	0	0	0	0	0	0	0	0	0	0	0	0	0	0	0	0	0	0
57800	0	0	0	0	0	0	0	0	0	0	0	0	0	0	0	0	0	0	0	0	0	0	0	0	0	0	0	0	0	0	0	0	0	0	0	0	0	0	0	0	0	0	0	0	0	0	0	0	0
57900	0	0	0	0	0	0	0	0	0	0	0	0	0	0	0	0	0	0	0	0	0	0	0	0	0	0	0	0	0	0	0	0	0	0	0	0	0	0	0	0	0	0	0	0	0	0	0	0	0
58000	0	0	0	0	0	0	0	0	0	0	0	0	0	0	0	0	0	0	0	0	0	0	0	0	0	0	0	0	0	0	0	0	0	0	0	0	0	0	0	0	0	0	0	0	0	0	0	0	0
58100	0	0	0	0	0	0	0	0	0	0	0	0	0	0	0	0	0	0	0	0	0	0	0	0	0	0	0	0	0	0	0	0	0	0	0	0	0	0	0	0	0	0	0	0	0	0	0	0	0
58200	0	0	0	0	0	0	0	0	0	0	0	0	0	0	0	0	0	0	0	0	0	0	0	0	0	0	0	0	0	0	0	0	0	0	0	0	0	0	0	0	0	0	0	0	0	0	0	0	0
58300	0	0	0	0	0	0	0	0	0	0	0	0	0	0	0	0	0	0	0	0	0	0	0	0	0	0	0	0	0	0	0	0	0	0	0	0	0	0	0	0	0	0	0	0	0	0	0	0	0
58400	0	0	0	0	0	0	0	0	0	0	0	0	0	0	0	0	0	0	0	0	0	0	0	0	0	0	0	0	0	0	0	0	0	0	0	0	0	0	0	0	0	0	0	0	0	0	0	0	0
58500	0	0	0	0	0	0	0	0	0	0	0	0	0	0	0	0	0	0	0	0	0	0	0	0	0	0	0	0	0	0	0	0	0	0	0	0	0	0	0	0	0	0	0	0	0	0	0	0	0
58600	0	0	0	0	0	0	0	0	0	0	0	0	0	0	0	0	0	0	0	0	0	0	0	0	0	0	0	0	0	0	0	0	0	0	0	0	0	0	0	0	0	0	0	0	0	0	0	0	0
58700	0	0	0	0	0	0	0	0	0	0	0	0	0	0	0	0	0	0	0	0	0	0	0	0	0	0	0	0	0	0	0	0	0	0	0	0	0	0	0	0	0	0	0	0	0	0	0	0	0
58800	0	0	0	0	0	0	0	0	0	0	0	0	0	0	0	0	0	0	0	0	0	0	0	0	0	0	0	0	0	0	0	0	0	0	0	0	0	0	0	0	0	0	0	0	0	0	0	0	0
58900	0	0	0	0	0	0	0	0	0	0	0	0	0	0	0	0	0	0	0	0	0	0	0	0	0	0	0	0	0	0	0	0	0	0	0	0	0	0	0	0	0	0	0	0	0	0	0	0	0
59000	0	0	0	0	0	0	0	0	0	0	0	0	0	0	0	0	0	0	0	0	0	0	0	0	0	0	0	0	0	0	0	0	0	0	0	0	0	0	0	0	0	0	0	0	0	0	0	0	0
59100	0	0	0	0	0	0	0	0	0	0	0	0	0	0	0	0	0	0	0	0	0	0	0	0	0	0	0	0	0	0	0	0	0	0	0	0	0	0	0	0	0	0	0	0	0	0	0	0	0
59200	0	0	0	0	0	0	0	0	0	0	0	0	0	0	0	0	0	0	0	0	0	0	0	0	0	0	0	0	0	0	0	0	0	0	0	0	0	0	0	0	0	0	0	0	0	0	0	0	0
59300	0	0	0	0	0	0	0	0	0	0	0	0	0	0	0	0	0	0	0	0	0	0	0	0	0	0	0	0	0	0	0	0	0	0	0	0	0	0	0	0	0	0	0	0	0	0	0	0	0
59400	0	0	0	0	0	0	0	0	0	0	0	0	0	0	0	0	0	0	0	0	0	0	0	0	0	0	0	0	0	0	0	0	0	0	0	0	0	0	0	0	0	0	0	0	0	0	0	0	0
59500	0	0	0	0	0	0	0	0	0	0	0	0	0	0	0	0	0	0	0	0	0	0	0	0	0	0	0	0	0	0	0	0	0	0	0	0	0	0	0	0	0	0	0	0	0	0	0	0	0
59600	0	0	0	0	0	0	0	0	0	0	0	0	0	0	0	0	0	0	0	0	0	0	0	0	0	0	0	0	0	0	0	0	0	0	0	0	0	0	0	0	0	0	0	0	0	0	0	0	0
59700	0	0	0	0	0	0	0	0	0	0	0	0	0	0	0	0	0	0	0	0	0	0	0	0	0	0	0	0	0	0	0	0	0	0	0	0	0	0	0	0	0	0	0	0	0	0	0	0	0
59800	0	0	0	0	0	0	0	0	0	0	0	0	0	0	0	0	0	0	0	0	0	0	0	0	0	0	0	0	0	0	0	0	0	0	0	0	0	0	0	0	0	0	0	0	0	0	0	0	0
59900	0	0	0	0	0	0	0	0	0	0	0	0	0	0	0	0	0	0	0	0	0	0	0	0	0	0	0	0	0	0	0	0	0	0	0	0	0	0	0	0	0	0	0	0	0	0	0	0	0
60000	0	0	0	0	0	0	0	0	0	0	0	0	0	0	0	0	0	0	0	0	0	0	0	0	0	0	0	0	0	0	0	0	0	0	0	0	0	0	0	0	0	0	0	0	0	0	0	0	0
60100	0	0	0	0	0	0	0	0	0	0	0	0	0	0	0	0	0	0	0	0	0	0	0	0	0	0	0	0	0	0	0	0	0	0	0	0	0	0	0	0	0	0	0	0	0	0	0	0	0
60200	0	0	0	0	0	0	0	0	0	0	0	0	0	0	0	0	0	0	0	0	0	0	0	0	0	0	0	0	0	0	0	0	0	0	0	0	0	0	0	0	0	0	0.0133333	0	0	0	0	0	0
60300	0	0	0	0	0	0	0	0	0	0	0	0	0	0	0	0	0	0	0	0	0	0	0	0	0	0	0	0	0	0	0	0	0	0	0	0	0	0	0	0	0	0	0	0	0	0	0	0	0
60400	0	0	0	0	0	0	0	0	0	0	0	0	0	0	0	0	0	0	0	0	0	0	0	0	0	0	0	0	0	0	0	0	0	0	0	0	0	0	0	0	0	0	0	0	0	0	0	0	0
60500	0	0	0	0	0	0	0	0	0	0	0	0	0	0	0	0	0	0	0	0	0	0	0	0	0	0	0	0	0	0	0	0	0	0	0	0	0	0	0	0	0	0	0	0	0	0	0	0	0
60600	0	0	0	0	0	0	0	0	0	0	0	0	0	0	0	0	0	0	0	0	0	0	0	0	0	0	0	0	0	0	0	0	0	0	0	0	0	0	0	0	0	0	0	0	0	0	0	0	0
60700	0	0	0	0	0	0	0	0	0	0	0	0	0	0	0	0	0	0	0	0	0	0	0	0	0	0	0	0	0	0	0	0	0	0	0	0	0	0	0	0	0	0	0	0	0	0	0	0	0
60800	0	0	0	0	0	0	0	0	0	0	0	0	0	0	0	0	0	0	0	0	0	0	0	0	0	0	0	0	0	0	0	0	0	0	0	0	0	0	0	0	0	0	0	0	0	0	0	0	0
60900	0	0	0	0	0	0	0	0	0	0	0	0	0	0	0	0	0	0	0	0	0	0	0	0	0	0	0	0	0	0	0	0	0	0	0	0	0	0	0	0	0	0	0	0	0	0	0	0	0
61000	0	0	0	0	0	0	0	0	0	0	0	0	0	0	0	0	0	0	0	0	0	0	0	0	0	0	0	0	0	0	0	0	0	0	0	0	0	0	0	0	0	0	0	0	0	0	0	0	0
61100	0	0	0	0	0	0	0	0	0	0	0	0	0	0	0	0	0	0	0	0	0	0	0	0	0	0	0	0	0	0	0	0	0	0	0	0	0	0	0	0	0	0	0	0	0	0	0	0	0
61200	0	0	0	0	0	0	0	0	0	0	0	0	0	0	0	0	0	0	0	0	0	0	0	0	0	0	0	0	0	0	0	0	0	0	0	0	0	0	0	0	0	0	0	0	0	0	0	0	0
61300	0	0	0	0	0	0	0	0	0	0	0	0	0	0	0	0	0	0	0	0	0	0	0	0	0	0	0	0	0	0	0	0	0	0	0	0	0	0	0	0	0	0	0	0	0	0	0	0	0
61400	0	0	0	0	0	0	0	0	0	0	0	0	0	0	0	0	0	0	0	0	0	0	0	0	0	0	0	0	0	0	0	0	0	0	0	0	0	0	0	0	0	0	0	0	0	0	0	0	0
61500	0	0	0	0	0	0	0	0	0	0	0	0	0	0	0	0	0	0	0	0	0	0	0	0	0	0	0	0	0	0	0	0	0	0	0	0	0	0	0	0	0	0	0	0	0	0	0	0	0
61600	0	0	0	0	0	0	0	0	0	0	0	0	0	0	0	0	0	0	0	0	0	0	0	0	0	0	0	0	0	0	0	0	0	0	0	0	0	0	0	0	0	0	0	0	0	0	0	0	0
61700	0	0	0	0	0	0	0	0	0	0	0	0	0	0	0	0	0	0	0	0	0	0	0	0	0	0	0	0	0	0	0	0	0	0	0	0	0	0	0	0	0	0	0	0	0	0	0	0	0
61800	0	0	0	0	0	0	0	0	0	0	0	0	0	0	0	0	0	0	0	0	0	0	0	0	0	0	0	0	0	0	0	0	0	0	0	0	0	0	0	0	0	0	0	0	0	0	0	0	0
61900	0	0	0	0	0	0	0	0	0	0	0	0	0	0	0	0	0	0	0	0	0	0	0	0	0	0	0	0	0	0	0	0	0	0	0	0	0	0	0	0	0	0	0	0	0	0	0	0	0
62000	0	0	0	0	0	0	0	0	0	0	0	0	0	0	0	0	0	0	0	0	0	0	0	0	0	0	0	0	0	0	0	0	0	0	0	0	0	0	0	0	0	0	0	0	0	0	0	0	0
62100	0	0	0	0	0	0	0	0	0	0	0	0	0	0	0	0	0	0	0	0	0	0	0	0	0	0	0	0	0	0	0	0	0	0	0	0	0	0	0	0	0	0	0	0	0	0	0	0	0
62200	0	0	0	0	0	0	0	0	0	0	0	0	0	0	0	0	0	0	0	0	0	0	0	0	0	0	0	0	0	0	0	0	0	0	0	0	0	0	0	0	0	0	0	0	0	0	0	0	0
62300	0	0	0	0	0	0	0	0	0	0	0	0	0	0	0	0	0	0	0	0	0	0	0	0	0	0	0	0	0	0	0	0	0	0	0	0	0	0	0	0	0	0	0	0	0	0	0	0	0
62400	0	0	0	0	0	0	0	0	0	0	0	0	0	0	0	0	0	0	0	0	0	0	0	0	0	0	0	0	0	0	0	0	0	0	0	0	0	0	0	0	0	0	0	0	0	0	0	0	0
62500	0	0	0	0	0	0	0	0	0	0	0	0	0	0	0	0	0	0	0	0	0	0	0	0	0	0	0	0	0	0	0	0	0	0	0	0	0	0	0	0	0	0	0	0	0	0	0	0	0
62600	0	0	0	0	0	0	0	0	0	0	0	0	0	0	0	0	0	0	0	0	0	0	0	0	0	0	0	0	0	0	0	0	0	0	0	0	0	0	0	0	0	0	0	0	0	0	0	0	0
62700	0	0	0	0	0	0	0	0	0	0	0	0	0	0	0	0	0	0	0	0	0	0	0	0	0	0	0	0	0	0	0	0	0	0	0	0	0	0	0	0	0	0	0	0	0	0	0	0	0
62800	0	0	0	0	0	0	0	0	0	0	0	0	0	0	0	0	0	0	0	0	0	0	0	0	0	0	0	0	0	0	0	0	0	0	0	0	0	0	0	0	0	0	0	0	0	0	0	0	0
62900	0	0	0	0	0	0	0	0	0	0	0	0	0	0	0	0	0	0	0	0	0	0	0	0	0	0	0	0	0	0	0	0	0	0	0	0	0	0	0	0	0	0	0	0	0	0	0	0	0
63000	0	0	0	0	0	0	0	0	0	0	0	0	0	0	0	0	0	0	0	0	0	0	0	0	0	0	0	0	0	0	0	0	0	0	0	0	0	0	0	0	0	0	0	0	0	0	0	0	0
63100	0	0	0	0	0	0	0	0	0	0	0	0	0	0	0	0	0	0	0	0	0	0	0	0	0	0	0	0	0	0	0	0	0	0	0	0	0	0	0	0	0	0	0	0	0	0	0	0	0
63200	0	0	0	0	0	0	0	0	0	0	0	0	0	0	0	0	0	0	0	0	0	0	0	0	0	0	0	0	0	0	0	0	0	0	0	0	0	0	0	0	0	0	0	0	0	0	0	0	0
63300	0	0	0	0	0	0	0	0	0	0	0	0	0	0	0	0	0	0	0	0	0	0	0	0	0	0	0	0	0	0	0	0	0	0	0	0	0	0	0	0	0	0	0	0	0	0	0	0	0
63400	0	0	0	0	0	0	0	0	0	0	0	0	0	0	0	0	0	0	0	0	0	0	0	0	0	0	0	0	0	0	0	0	0	0	0	0	0	0	0	0	0	0	0	0	0	0	0	0	0
63500	0	0	0	0	0	0	0	0	0	0	0	0	0	0	0	0	0	0	0	0	0	0	0	0	0	0	0	0	0	0	0	0	0	0	0	0	0	0	0	0	0	0	0	0	0	0	0	0	0
63600	0	0	0	0	0	0	0	0	0	0	0	0	0	0	0	0	0	0	0	0	0	0	0	0	0	0	0	0	0	0	0	0	0	0	0	0	0	0	0	0	0	0	0	0	0	0	0	0	0
63700	0	0	0	0	0	0	0	0	0	0	0	0	0	0	0	0	0	0	0	0	0	0	0	0	0	0	0	0	0	0	0	0	0	0	0	0	0	0	0	0	0	0	0	0	0	0	0	0	0
63800	0	0	0	0	0	0	0	0	0	0	0	0	0	0	0	0	0	0	0	0	0	0	0	0	0	0	0	0	0	0	0	0	0	0	0	0	0	0	0	0	0	0	0	0	0	0	0	0	0
63900	0	0	0	0	0	0	0	0	0	0	0	0	0	0	0	0	0	0	0	0	0	0	0	0	0	0	0	0	0	0	0	0	0	0	0	0	0	0	0	0	0	0	0	0	0	0	0	0	0
64000	0	0	0	0	0	0	0	0	0	0	0	0	0	0	0	0	0	0	0	0	0	0	0	0	0	0	0	0	0	0	0	0	0	0	0	0	0	0	0	0	0	0	0	0	0	0	0	0	0
64100	0	0	0	0	0	0	0	0	0	0	0	0	0	0	0	0	0	0	0	0	0	0	0	0	0	0	0	0	0	0	0	0	0	0	0	0	0	0	0	0	0	0	0	0	0	0	0	0	0
64200	0	0	0	0	0	0	0	0	0	0	0	0	0	0	0	0	0	0	0	0	0	0	0	0	0	0	0	0	0	0	0	0	0	0	0	0	0	0	0	0	0	0	0	0	0	0	0	0	0
64300	0	0	0	0	0	0	0	0	0	0	0	0	0	0	0	0	0	0	0	0	0	0	0	0	0	0	0	0	0	0	0	0	0	0	0	0	0	0	0	0	0	0	0	0	0	0	0	0	0
64400	0	0	0	0	0	0	0	0	0	0	0	0	0	0	0	0	0	0	0	0	0	0	0	0	0	0	0	0	0	0	0	0	0	0	0	0	0	0	0	0	0	0	0	0	0	0	0	0	0
64500	0	0	0	0	0	0	0	0	0	0	0	0	0	0	0	0	0	0	0	0	0	0	0	0	0	0	0	0	0	0	0	0	0	0	0	0	0	0	0	0	0	0	0	0	0	0	0	0	0
64600	0	0	0	0	0	0	0	0	0	0	0	0	0	0	0	0	0	0	0	0	0	0	0	0	0	0	0	0	0	0	0	0	0	0	0	0	0	0	0	0	0	0	0	0	0	0	0	0	0
64700	0	0	0	0	0	0	0	0	0	0	0	0	0	0	0	0	0	0	0	0	0	0	0	0	0	0	0	0	0	0	0	0	0	0	0	0	0	0	0	0	0	0	0	0	0	0	0	0	0
64800	0	0	0	0	0	0	0	0	0	0	0	0	0	0	0	0	0	0	0	0	0	0	0	0	0	0	0	0	0	0	0	0	0	0	0	0	0	0	0	0	0	0	0	0	0	0	0	0	0
64900	0	0	0	0	0	0	0	0	0	0	0	0	0	0	0	0	0	0	0	0	0	0	0	0	0	0	0	0	0	0	0	0	0	0	0	0	0	0	0	0	0	0	0	0	0	0	0	0	0
65000	0	0	0	0	0	0	0	0	0	0	0	0	0	0	0	0	0	0	0	0	0	0	0	0	0	0	0	0	0	0	0	0	0	0	0	0	0	0	0	0	0	0	0	0	0	0	0	0	0
65100	0	0	0	0	0	0	0	0	0	0	0	0	0	0	0	0	0	0	0	0	0	0	0	0	0	0	0	0	0	0	0	0	0	0	0	0	0	0	0	0	0	0	0	0	0	0	0	0	0
65200	0	0	0	0	0	0	0	0	0	0	0	0	0	0	0	0	0	0	0	0	0	0	0	0	0	0	0	0	0	0	0	0	0	0	0	0	0	0	0	0	0	0	0	0	0	0	0	0	0
65300	0	0	0	0	0	0	0	0	0	0	0	0	0	0	0	0	0	0	0	0	0	0	0	0	0	0	0	0	0	0	0	0	0	0	0	0	0	0	0	0	0	0	0	0	0	0	0	0	0
65400	0	0	0	0	0	0	0	0	0	0	0	0	0	0	0	0	0	0	0	0	0	0	0	0	0	0	0	0	0	0	0	0	0	0	0	0	0	0	0	0	0	0	0	0	0	0	0	0	0
65500	0	0	0	0	0	0	0	0	0	0	0	0	0	0	0	0	0	0	0	0	0	0	0	0	0	0	0	0	0	0	0	0	0	0	0	0	0	0	0	0	0	0	0	0	0	0	0	0	0
65600	0	0	0	0	0	0	0	0	0	0	0	0	0	0	0	0	0	0	0	0	0	0	0	0	0	0	0	0	0	0	0	0	0	0	0	0	0	0	0	0	0	0	0	0	0	0	0	0	0
65700	0	0	0	0	0	0	0	0	0	0	0	0	0	0	0	0	0	0	0	0	0	0	0	0	0	0	0	0	0	0	0	0	0	0	0	0	0	0	0	0	0	0	0	0	0	0	0	0	0
65800	0	0	0	0	0	0	0	0	0	0	0	0	0	0	0	0	0	0	0	0	0	0	0	0	0	0	0	0	0	0	0	0	0	0	0	0	0	0	0	0	0	0	0	0	0	0	0	0	0
65900	0	0	0	0	0	0	0	0	0	0	0	0	0	0	0	0	0	0	0	0	0	0	0	0	0	0	0	0	0	0	0	0	0	0	0	0	0	0	0	0	0	0	0	0	0	0	0	0	0
66000	0	0	0	0	0	0	0	0	0	0	0	0	0	0	0	0	0	0	0	0	0	0	0	0	0	0	0	0	0	0	0	0	0	0	0	0	0	0	0	0	0	0	0	0	0	0	0	0	0
66100	0	0	0	0	0	0	0	0	0	0	0	0	0	0	0	0	0	0	0	0	0	0	0	0	0	0	0	0	0	0	0	0	0	0	0	0	0	0	0	0	0	0	0	0	0	0	0	0	0
66200	0	0	0	0	0	0	0	0	0	0	0	0	0	0	0	0	0	0	0	0	0	0	0	0	0	0	0	0	0	0	0	0	0	0	0	0	0	0	0	0	0	0	0	0	0	0	0	0	0
66300	0	0	0	0	0	0	0	0	0	0	0	0	0	0	0	0	0	0	0	0	0	0	0	0	0	0	0	0	0	0	0	0	0	0	0	0	0	0	0	0	0	0	0	0	0	0	0	0	0
66400	0	0	0	0	0	0	0	0	0	0	0	0	0	0	0	0	0	0	0	0	0	0	0	0	0	0	0	0	0	0	0	0	0	0	0	0	0	0	0	0	0	0	0	0	0	0	0	0	0
66500	0	0	0	0	0	0	0	0	0	0	0	0	0	0	0	0	0	0	0	0	0	0	0	0	0	0	0	0	0	0	0	0	0	0	0	0	0	0	0	0	0	0	0	0	0	0	0	0	0
66600	0	0	0	0	0	0	0	0	0	0	0	0	0	0	0	0	0	0	0	0	0	0	0	0	0	0	0	0	0	0	0	0	0	0	0	0	0	0	0	0	0	0	0	0	0	0	0	0	0
66700	0	0	0	0	0	0	0	0	0	0	0	0	0	0	0	0	0	0	0	0	0	0	0	0	0	0	0	0	0	0	0	0	0	0	0	0	0	0	0	0	0	0	0	0	0	0	0	0	0
66800	0	0	0	0	0	0	0	0	0	0	0	0	0	0	0	0	0	0	0	0	0	0	0	0	0	0	0	0	0	0	0	0	0	0	0	0	0	0	0	0	0	0	0	0	0	0	0	0	0
66900	0	0	0	0	0	0	0	0	0	0	0	0	0	0	0	0	0	0	0	0	0	0	0	0	0	0	0	0	0	0	0	0	0	0	0	0	0	0	0	0	0	0	0	0	0	0	0	0	0
67000	0	0	0	0	0	0	0	0	0	0	0	0	0	0	0	0	0	0	0	0	0	0	0	0	0	0	0	0	0	0	0	0	0	0	0	0	0	0	0	0	0	0	0	0	0	0	0	0	0
67100	0	0	0	0	0	0	0	0	0	0	0	0	0	0	0	0	0	0	0	0	0	0	0	0	0	0	0	0	0	0	0	0	0	0	0	0	0	0	0	0	0	0	0	0	0	0	0	0	0
67200	0	0	0	0	0	0	0	0	0	0	0	0	0	0	0	0	0	0	0	0	0	0	0	0	0	0	0	0	0	0	0	0	0	0	0	0	0	0	0	0	0	0	0	0	0	0	0	0	0
67300	0	0	0	0	0	0	0	0	0	0	0	0	0	0	0	0	0	0	0	0	0	0	0	0	0	0	0	0	0	0	0	0	0	0	0	0	0	0	0	0	0	0	0	0	0	0	0	0	0
67400	0	0	0	0	0	0	0	0	0	0	0	0	0	0	0	0	0	0	0	0	0	0	0	0	0	0	0	0	0	0	0	0	0	0	0	0	0	0	0	0	0	0	0	0	0	0	0	0	0
67500	0	0	0	0	0	0	0	0	0	0	0	0	0	0	0	0	0	0	0	0	0	0	0	0	0	0	0	0	0	0	0	0	0	0	0	0	0	0	0	0	0	0	0	0	0	0	0	0	0
67600	0	0	0	0	0	0	0	0	0	0	0	0	0	0	0	0	0	0	0	0	0	0	0	0	0	0	0	0	0	0	0	0	0	0	0	0	0	0	0	0	0	0	0	0	0	0	0	0	0
67700	0	0	0	0	0	0	0	0	0	0	0	0	0	0	0	0	0	0	0	0	0	0	0	0	0	0	0	0	0	0	0	0	0	0	0	0	0	0	0	0	0	0	0	0	0	0	0	0	0
67800	0	0	0	0	0	0	0	0	0	0	0	0	0	0	0	0	0	0	0	0	0	0	0	0	0	0	0	0	0	0	0	0	0	0	0	0	0	0	0	0	0	0	0	0	0	0	0	0	0
67900	0	0	0	0	0	0	0	0	0	0	0	0	0	0	0	0	0	0	0	0	0	0	0	0	0	0	0	0	0	0	0	0	0	0	0	0	0	0	0	0	0	0	0	0	0	0	0	0	0
68000	0	0	0	0	0	0	0	0	0	0	0	0	0	0	0	0	0	0	0	0	0	0	0	0	0	0	0	0	0	0	0	0	0	0	0	0	0	0	0	0	0	0	0	0	0	0	0	0	0
68100	0	0	0	0	0	0	0	0	0	0	0	0	0	0	0	0	0	0	0	0	0	0	0	0	0	0	0	0	0	0	0	0	0	0	0	0	0	0	0	0	0	0	0	0	0	0	0	0	0
68200	0	0	0	0	0	0	0	0	0	0	0	0	0	0	0	0	0	0	0	0	0	0	0	0	0	0	0	0	0	0	0	0	0	0	0	0	0	0	0	0	0	0	0	0	0	0	0	0	0
68300	0	0	0	0	0	0	0	0	0	0	0	0	0	0	0	0	0	0	0	0	0	0	0	0	0	0	0	0	0	0	0	0	0	0	0	0	0	0	0	0	0	0	0	0	0	0	0	0	0
68400	0	0	0	0	0	0	0	0	0	0	0	0	0	0	0	0	0	0	0	0	0	0	0	0	0	0	0	0	0	0	0	0	0	0	0	0	0	0	0	0	0	0	0	0	0	0	0	0	0
68500	0	0	0	0	0	0	0	0	0	0	0	0	0	0	0	0	0	0	0	0	0	0	0	0	0	0	0	0	0	0	0	0	0	0	0	0	0	0	0	0	0	0	0	0	0	0	0	0	0
68600	0	0	0	0	0	0	0	0	0	0	0	0	0	0	0	0	0	0	0	0	0	0	0	0	0	0	0	0	0	0	0	0	0	0	0	0	0	0	0	0	0	0	0	0	0	0	0	0	0
68700	0	0	0	0	0	0	0	0	0	0	0	0	0	0	0	0	0	0	0	0	0	0	0	0	0	0	0	0	0	0	0	0	0	0	0	0	0	0	0	0	0	0	0	0	0	0	0	0	0
68800	0	0	0	0	0	0	0	0	0	0	0	0	0	0	0	0	0	0	0	0	0	0	0	0	0	0	0	0	0	0	0	0	0	0	0	0	0	0	0	0	0	0	0	0	0	0	0	0	0
68900	0	0	0	0	0	0	0	0	0	0	0	0	0	0	0	0	0	0	0	0	0	0	0	0	0	0	0	0	0	0	0	0	0	0	0	0	0	0	0	0	0	0	0	0	0	0	0	0	0
69000	0	0	0	0	0	0	0	0	0	0	0	0	0	0	0	0	0	0	0	0	0	0	0	0	0	0	0	0	0	0	0	0	0	0	0	0	0	0	0	0	0	0	0	0	0	0	0	0	0
69100	0	0	0	0	0	0	0	0	0	0	0	0	0	0	0	0	0	0	0	0	0	0	0	0	0	0	0	0	0	0	0	0	0	0	0	0	0	0	0	0	0	0	0	0	0	0	0	0	0
69200	0	0	0	0	0	0	0	0	0	0	0	0	0	0	0	0	0	0	0	0	0	0	0	0	0	0	0	0	0	0	0	0	0	0	0	0	0	0	0	0	0	0	0	0	0	0	0	0	0
69300	0	0	0	0	0	0	0	0	0	0	0	0	0	0	0	0	0	0	0	0	0	0	0	0	0	0	0	0	0	0	0	0	0	0	0	0	0	0	0	0	0	0	0	0	0	0	0	0	0
69400	0	0	0	0	0	0	0	0	0	0	0	0	0	0	0	0	0	0	0	0	0	0	0	0	0	0	0	0	0	0	0	0	0	0	0	0	0	0	0	0	0	0	0	0	0	0	0	0	0
69500	0	0	0	0	0	0	0	0	0	0	0	0	0	0	0	0	0	0	0	0	0	0	0	0	0	0	0	0	0	0	0	0	0	0	0	0	0	0	0	0	0	0	0	0	0	0	0	0	0
69600	0	0	0	0	0	0	0	0	0	0	0	0	0	0	0	0	0	0	0	0	0	0	0	0	0	0	0	0	0	0	0	0	0	0	0	0	0	0	0	0	0	0	0	0	0	0	0	0	0
69700	0	0	0	0	0	0	0	0	0	0	0	0	0	0	0	0	0	0	0	0	0	0	0	0	0	0	0	0	0	0	0	0	0	0	0	0	0	0	0	0	0	0	0	0	0	0	0	0	0
69800	0	0	0	0	0	0	0	0	0	0	0	0	0	0	0	0	0	0	0	0	0	0	0	0	0	0	0	0	0	0	0	0	0	0	0	0	0	0	0	0	0	0	0	0	0	0	0	0	0
69900	0	0	0	0	0	0	0	0	0	0	0	0	0	0	0	0	0	0	0	0	0	0	0	0	0	0	0	0	0	0	0	0	0	0	0	0	0	0	0	0	0	0	0	0	0	0	0	0	0
70000	0	0	0	0	0	0	0	0	0	0	0	0	0	0	0	0	0	0	0	0	0	0	0	0	0	0	0	0	0	0	0	0	0	0	0	0	0	0	0	0	0	0	0	0	0	0	0	0	0
70100	0	0	0	0	0	0	0	0	0	0	0	0	0	0	0	0	0	0	0	0	0	0	0	0	0	0	0	0	0	0	0	0	0	0	0	0	0	0	0	0	0	0	0	0	0	0	0	0	0
70200	0	0	0	0	0	0	0	0	0	0	0	0	0	0	0	0	0	0	0	0	0	0	0	0	0	0	0	0	0	0	0	0	0	0	0	0	0	0	0	0	0	0	0	0	0	0	0	0	0
70300	0	0	0	0	0	0	0	0	0	0	0	0	0	0	0	0	0	0	0	0	0	0	0	0	0	0	0	0	0	0	0	0	0	0	0	0	0	0	0	0	0	0	0	0	0	0	0	0	0
70400	0	0	0	0	0	0	0	0	0	0	0	0	0	0	0	0	0	0	0	0	0	0	0	0	0	0	0	0	0	0	0	0	0	0	0	0	0	0	0	0	0	0	0	0	0	0	0	0	0
70500	0	0	0	0	0	0	0	0	0	0	0	0	0	0	0	0	0	0	0	0	0	0	0	0	0	0	0	0	0	0	0	0	0	0	0	0	0	0	0	0	0	0	0	0	0	0	0	0	0
[truncated: 236 more columns]

## Sheet: Fig 5H 5I 5J
Fig 5H - In Silico - Drop GABA Release - All				Fig 5I - In Silico - Drop GABA Release - Burst				Fig 5J - In Silico - Drop GABA Release - Single
	Firing Rate (spikes/s)				Firing Rate (bursts/s)				Firing Rate (spikes/s)
Model Neuron	BL	↓ GABA		Model Neuron	BL	↓ GABA		Model Neuron	BL	↓ GABA
1	4.415	28.29		1	0.215	0.76		1	3.855	25.9
2	8.48	20.36		2	0.36	0.72		2	7.495	18.23
3	2.745	14.975		3	0.11	0.605		3	2.49	13.315
4	2.445	17.965		4	0.11	0.635		4	2.185	16.065
5	1.31	13.51		5	0.07	0.675		5	1.165	11.555
6	2.675	18.33		6	0.095	0.755		6	2.46	16.195
7	0.635	17.565		7	0.045	0.775		7	0.525	15.42
8	2.12	18.04		8	0.1	0.675		8	1.84	16.16
9	2.01	28.17		9	0.075	0.81		9	1.835	25.665
10	0.41	26.015		10	0.01	0.78		10	0.39	23.545
11	1.315	14.56		11	0.065	0.59		11	1.155	12.84
12	1.78	27.28		12	0.09	0.87		12	1.555	24.715
13	7.925	27.51		13	0.385	1.06		13	6.885	24.295
14	1.155	17.98		14	0.06	0.8		14	1.01	15.685
15	1.06	25.865		15	0.06	0.685		15	0.92	23.705
16	3.5	21.495		16	0.18	0.67		16	3.06	19.49
17	2.935	22.7		17	0.165	0.93		17	2.51	20.065
18	3.765	22.74		18	0.215	0.93		18	3.295	20.185
19	1.475	13.125		19	0.07	0.67		19	1.31	11.315
20	1.725	21.57		20	0.065	0.82		20	1.57	19.215
21	5.185	30.03		21	0.23	0.85		21	4.62	27.295
22	1.725	27.4		22	0.06	0.89		22	1.59	24.75
23	2.48	19.305		23	0.13	0.72		23	2.15	17.345
24	1.53	30.095		24	0.085	0.84		24	1.33	27.425
25	0.37	20.335		25	0.015	0.78		25	0.34	18.075
26	2.43	13.65		26	0.145	0.575		26	2.11	12.03
27	2.565	22.16		27	0.125	0.83		27	2.255	19.79
28	3.13	14.45		28	0.145	0.57		28	2.805	12.885
29	2.125	25.82		29	0.08	0.86		29	1.945	23.175
30	8.69	30.595		30	0.345	0.825		30	7.71	28.02
31	2.17	13.995		31	0.12	0.62		31	1.87	12.28
32	1.57	15.075		32	0.06	0.675		32	1.42	13.13
33	0.685	18.495		33	0.04	0.7		33	0.59	16.52
34	2.525	26.16		34	0.155	0.975		34	2.165	23.24
35	1.32	21.56		35	0.065	0.825		35	1.165	19.275
36	2.445	16.73		36	0.115	0.735		36	2.165	14.84
37	6.77	20.305		37	0.315	0.845		37	5.89	18.045
38	3.585	28.575		38	0.225	0.9		38	3.045	25.805
39	0.75	10.155		39	0.04	0.455		39	0.66	8.925
40	0.8	11.495		40	0.045	0.47		40	0.69	10.22
41	1.66	11.9		41	0.1	0.56		41	1.425	10.29
42	2.67	29.705		42	0.125	0.985		42	2.35	26.735
43	2.695	26.2		43	0.125	0.89		43	2.395	23.52
44	5.1	16.355		44	0.235	0.74		44	4.53	14.2
45	1.015	14.52		45	0.05	0.68		45	0.9	12.605
46	1.395	14.265		46	0.09	0.585		46	1.175	12.585
47	3.555	23.84		47	0.19	0.87		47	3.08	21.265
48	6.68	20.555		48	0.305	0.685		48	5.87	18.525
49	3.39	20.375		49	0.17	0.805		49	2.965	18.08
50	6.19	15.98		50	0.225	0.545		50	5.58	14.525
51	5.03	16.855		51	0.225	0.73		51	4.51	14.725
52	1.91	25.645		52	0.09	0.825		52	1.685	23.225
53	4.775	29.885		53	0.22	0.91		53	4.155	27.075
54	1.64	12.975		54	0.11	0.62		54	1.36	11.26
55	1.235	14.405		55	0.095	0.67		55	1.025	12.5
56	1.545	28.85		56	0.065	0.74		56	1.4	26.625
57	4.275	16.91		57	0.185	0.655		57	3.81	15.115
58	2.405	18.605		58	0.085	0.69		58	2.19	16.62
59	1.515	27.69		59	0.12	0.99		59	1.26	24.8
60	4.315	17.57		60	0.205	0.96		60	3.82	15.17
61	3.775	22.71		61	0.215	0.815		61	3.2	20.49
62	0.305	8.82		62	0.015	0.385		62	0.275	7.76
63	2.345	20.78		63	0.135	0.76		63	2.02	18.47
64	6.115	23.425		64	0.36	0.955		64	5.2	20.56
65	3.01	24.885		65	0.175	0.91		65	2.55	22.18
66	5.365	21.595		66	0.305	0.84		66	4.605	19.045
67	2.115	25.87		67	0.095	0.745		67	1.875	23.76
68	2.085	18.46		68	0.13	0.685		68	1.76	16.54
69	3.045	17.315		69	0.13	0.52		69	2.73	15.815
70	0.9	15.575		70	0.05	0.655		70	0.78	13.765
71	2.265	16.8		71	0.14	0.735		71	1.96	14.705
72	4.135	23.945		72	0.215	0.845		72	3.58	21.45
73	5.285	27.16		73	0.255	0.795		73	4.605	24.855
74	8.04	27.73		74	0.335	0.92		74	7.09	24.95
75	3.365	22.48		75	0.17	0.925		75	2.9	19.83
76	6.755	18.63		76	0.355	0.71		76	5.79	16.695
77	0.235	8.15		77	0.005	0.335		77	0.225	7.26
78	9.53	24.18		78	0.49	0.815		78	8.195	21.81
79	1.815	15.595		79	0.1	0.655		79	1.59	13.74
80	1.315	29.13		80	0.045	0.825		80	1.21	26.545
81	2.82	15.82		81	0.15	0.625		81	2.49	14.025
82	0.99	27.565		82	0.05	0.895		82	0.86	24.915
83	3	25.705		83	0.125	0.865		83	2.675	23.185
84	0.81	14.485		84	0.03	0.51		84	0.74	13.025
85	2.645	18.6		85	0.145	0.72		85	2.275	16.61
86	4.12	28.975		86	0.225	0.97		86	3.595	26.025
87	2.895	15.905		87	0.12	0.625		87	2.605	14.015
88	5.315	24.22		88	0.26	0.805		88	4.645	21.775
89	2.415	14.12		89	0.16	0.6		89	2.035	12.335
90	0.23	9.165		90	0.01	0.435		90	0.205	7.995
91	1.985	23.81		91	0.09	0.58		91	1.765	22.05
92	2.25	15.34		92	0.07	0.54		92	2.08	13.76
93	1.695	28.24		93	0.065	0.82		93	1.54	25.82
94	1.485	19.99		94	0.095	0.905		94	1.255	17.35
95	2.795	19.965		95	0.14	0.765		95	2.465	17.745
96	4.1	22.335		96	0.23	0.765		96	3.535	20.13
97	1.75	17.19		97	0.07	0.71		97	1.59	15.13
98	2.345	25.79		98	0.175	1.13		98	1.935	22.475
99	1.5	26.18		99	0.095	0.89		99	1.255	23.41
100	1.59	22.645		100	0.06	0.745		100	1.44	20.41
101	3.305	29.185		101	0.135	0.84		101	2.95	26.56
102	3.635	26.105		102	0.165	0.805		102	3.21	23.695
103	4.645	26.405		103	0.225	0.77		103	4.025	24.16
104	1.61	22.21		104	0.09	0.86		104	1.365	19.805
105	0.275	19.665		105	0.01	0.795		105	0.255	17.325
106	0.725	9.35		106	0.035	0.45		106	0.655	8.22
107	4.04	27.45		107	0.225	0.805		107	3.465	24.825
108	1.85	26.465		108	0.04	0.735		108	1.755	24.09
109	0.795	16.26		109	0.005	0.765		109	0.78	14.1
110	1.325	25.26		110	0.07	0.855		110	1.165	22.71
111	1.72	30.74		111	0.09	0.875		111	1.495	28.05
112	5.405	28.415		112	0.245	0.855		112	4.74	25.71
113	3.235	20.755		113	0.14	0.685		113	2.855	18.7
114	6.46	26.605		114	0.32	0.99		114	5.63	23.725
115	1.62	19.41		115	0.07	0.745		115	1.47	17.305
116	2.31	15.305		116	0.14	0.73		116	1.96	13.355
117	1.095	17.85		117	0.04	0.91		117	1.005	15.455
118	6.36	25.1		118	0.35	0.785		118	5.415	22.75
119	5.01	19.99		119	0.295	0.68		119	4.25	18.05
120	1.88	13.82		120	0.06	0.645		120	1.73	12.075
121	8.07	22.065		121	0.35	0.905		121	7.15	19.515
122	1.13	23.875		122	0.045	0.77		122	1.03	21.525
123	2.21	26.075		123	0.105	0.79		123	1.965	23.835
124	1.355	26.595		124	0.085	0.92		124	1.145	23.99
125	7.585	21.25		125	0.36	0.855		125	6.73	18.745
126	2.3	19.44		126	0.14	0.68		126	1.97	17.465
127	0.885	10.605		127	0.045	0.535		127	0.785	9.17
128	1.725	21.635		128	0.09	0.705		128	1.52	19.58
129	10.5	18.515		129	0.415	0.515		129	9.37	17.04
130	0.475	21.655		130	0.01	0.68		130	0.45	19.69
131	0.315	11.845		131	0.005	0.405		131	0.305	10.645
132	1.705	12.875		132	0.085	0.645		132	1.49	11.125
133	5.5	19.615		133	0.27	0.81		133	4.78	17.14
134	0.66	26.03		134	0.055	0.745		134	0.53	23.725
135	8.655	17.65		135	0.38	0.615		135	7.65	15.81
136	5.93	24.555		136	0.26	0.895		136	5.26	21.95
137	1.9	20.52		137	0.12	0.67		137	1.595	18.61
138	1.915	23.105		138	0.075	0.89		138	1.725	20.495
139	4.095	20.21		139	0.215	0.835		139	3.55	17.845
140	0.82	27.31		140	0.055	0.845		140	0.715	24.94
141	1.68	27.69		141	0.075	0.89		141	1.49	24.865
142	7.505	27.53		142	0.365	0.78		142	6.53	25.04
143	3.87	30.26		143	0.18	0.92		143	3.43	27.435
144	1.49	17.655		144	0.08	0.705		144	1.295	15.665
145	4.925	31.245		145	0.245	0.94		145	4.295	28.15
146	3.885	18.44		146	0.195	0.815		146	3.36	16.02
147	2.15	23.05		147	0.11	0.955		147	1.915	20.11
148	0.77	21.565		148	0.03	0.735		148	0.705	19.365
149	5.625	29.135		149	0.315	0.855		149	4.865	26.525
150	1.955	14.89		150	0.09	0.7		150	1.725	12.925
151	0.7	15.03		151	0.02	0.56		151	0.645	13.44
152	4.095	25.035		152	0.225	0.85		152	3.535	22.475
153	2.86	18.86		153	0.16	0.615		153	2.455	17.085
154	1.195	11.8		154	0.045	0.485		154	1.075	10.475
155	2.37	21.37		155	0.085	0.655		155	2.175	19.41
156	3.83	26.835		156	0.18	0.97		156	3.43	23.935
157	2.055	17.705		157	0.14	0.73		157	1.71	15.515
158	1.23	23.12		158	0.065	0.735		158	1.09	20.87
159	5.375	21.16		159	0.31	0.855		159	4.56	18.675
160	0.87	13.01		160	0.025	0.53		160	0.82	11.615
161	3.145	19.525		161	0.14	0.74		161	2.8	17.22
162	4.04	23.985		162	0.215	0.885		162	3.45	21.195
163	1.865	24.425		163	0.12	0.76		163	1.605	22.195
164	1.125	14.795		164	0.04	0.53		164	1.045	13.27
165	1.33	26.6		165	0.11	0.895		165	1.065	23.89
166	3.34	16.355		166	0.16	0.605		166	2.905	14.71
167	7.06	28.01		167	0.305	0.825		167	6.21	25.5
168	1.94	17.16		168	0.09	0.715		168	1.73	15.155
169	6.16	27.295		169	0.305	0.72		169	5.28	25.01
170	0.78	25.585		170	0.045	0.855		170	0.655	23.175
171	6.37	18.77		171	0.265	0.62		171	5.58	16.93
172	0.79	28.165		172	0.04	1		172	0.7	25.285
173	4.915	26.85		173	0.19	0.75		173	4.47	24.515
174	6.325	29.405		174	0.325	0.795		174	5.495	26.95
175	2.31	16.42		175	0.08	0.8		175	2.135	14.36
176	2.52	30.005		176	0.13	0.955		176	2.215	26.975
177	3.285	28.66		177	0.17	0.725		177	2.85	26.635
178	3.16	28.93		178	0.145	0.87		178	2.75	26.28
179	4.585	22.48		179	0.19	0.66		179	4.155	20.575
180	3.815	29.63		180	0.185	0.925		180	3.33	26.715
181	2.485	19.645		181	0.105	0.615		181	2.23	17.735
182	3.61	16.425		182	0.15	0.69		182	3.235	14.365
183	3.575	16.085		183	0.16	0.805		183	3.13	13.87
184	1.27	13.815		184	0.085	0.575		184	1.065	12.235
185	1.595	12.94		185	0.065	0.65		185	1.42	11.265
186	3.505	17.39		186	0.155	0.7		186	3.115	15.35
187	6.485	17.03		187	0.325	0.62		187	5.62	15.225
188	0.515	16.375		188	0.03	0.605		188	0.43	14.655
189	1.605	15.575		189	0.095	0.645		189	1.385	13.745
190	8.445	22.37		190	0.385	0.76		190	7.445	20.13
191	0.725	13.045		191	0.025	0.525		191	0.66	11.55
192	6.96	23.455		192	0.395	0.805		192	5.945	21.06
193	1.165	26.265		193	0.05	0.745		193	1.04	24.015
194	2.46	15.36		194	0.14	0.655		194	2.115	13.535
195	3.05	24.885		195	0.16	0.715		195	2.65	22.59
196	1.03	17.53		196	0.03	0.575		196	0.955	15.845
197	5.21	18.565		197	0.22	0.765		197	4.65	16.36
198	1.395	14.24		198	0.085	0.57		198	1.17	12.685
199	2.96	26.54		199	0.14	0.725		199	2.64	24.415
200	1.65	21.75		200	0.065	0.59		200	1.49	19.955
201	2.025	23.345		201	0.095	0.595		201	1.77	21.465
202	5.815	13.685		202	0.205	0.45		202	5.28	12.43
203	2.095	17.215		203	0.12	0.655		203	1.83	15.4
204	2.93	17.365		204	0.155	0.69		204	2.545	15.415
205	2.895	30.06		205	0.175	0.91		205	2.44	27.375
206	0.58	12.12		206	0.035	0.505		206	0.495	10.65
207	1.035	20.53		207	0.065	0.76		207	0.865	18.405
208	2.94	16.55		208	0.115	0.65		208	2.675	14.62
209	2.995	16.21		209	0.165	0.57		209	2.605	14.62
210	2.47	25.19		210	0.125	0.845		210	2.175	22.8
211	5.79	25.945		211	0.345	0.96		211	4.96	23.07
212	3.065	25.255		212	0.13	0.705		212	2.735	23.03
213	1.95	27.605		213	0.09	0.675		213	1.74	25.535
214	1.47	13.265		214	0.06	0.645		214	1.335	11.48
215	1.635	17.095		215	0.06	0.69		215	1.49	15.18
216	0.515	27.45		216	0.025	0.95		216	0.465	24.665
217	8.905	28.09		217	0.42	0.745		217	7.775	25.895
218	1.49	22.485		218	0.055	0.82		218	1.36	20.27
219	1.09	15.81		219	0.09	0.65		219	0.87	13.95
220	2.615	19.005		220	0.115	0.69		220	2.335	16.955
221	4.575	25.245		221	0.225	0.775		221	4.005	22.91
222	4.21	27.39		222	0.195	0.71		222	3.72	25.165
223	1.625	12.745		223	0.075	0.68		223	1.45	10.94
224	0.325	7.46		224	0.02	0.31		224	0.285	6.635
225	1.875	16.39		225	0.09	0.655		225	1.655	14.51
226	8.54	27.73		226	0.385	0.7		226	7.545	25.545
227	3.355	24.385		227	0.195	0.68		227	2.875	22.32
228	2.69	14.56		228	0.125	0.55		228	2.37	12.96
229	4.175	17.535		229	0.24	0.735		229	3.59	15.44
230	1.165	17.855		230	0.07	0.625		230	1.01	16.025
231	1.85	14.815		231	0.115	0.62		231	1.56	13.135
232	1.6	26.295		232	0.075	0.93		232	1.43	23.575
233	1.675	15.965		233	0.11	0.82		233	1.375	13.63
234	1.28	14.06		234	0.055	0.57		234	1.145	12.535
235	2.01	11.3		235	0.08	0.505		235	1.81	9.975
236	11.635	28		236	0.465	0.815		236	10.31	25.565
237	3.245	26.055		237	0.18	0.76		237	2.79	23.88
238	1.33	29.1		238	0.06	0.875		238	1.19	26.49
239	6.05	26.21		239	0.36	0.945		239	5.07	23.63
240	5.365	19.87		240	0.21	0.705		240	4.78	17.715
241	1.465	14.905		241	0.06	0.66		241	1.32	13.135
242	3.605	19.56		242	0.18	0.73		242	3.16	17.365
243	2.775	26.56		243	0.13	0.86		243	2.455	23.885
244	6.595	24.745		244	0.355	0.83		244	5.66	22.22
245	2.05	16		245	0.055	0.565		245	1.905	14.4
246	2.045	19.115		246	0.095	0.61		246	1.855	17.365
247	0.395	12.92		247	0.02	0.62		247	0.355	11.195
248	1.4	28.72		248	0.055	0.89		248	1.25	25.84
249	0.825	23.165		249	0.07	0.845		249	0.655	20.66
250	8.835	23.415		250	0.51	0.785		250	7.5	21.315
251	5.99	26.88		251	0.25	0.925		251	5.34	23.95
252	4.545	27.055		252	0.275	0.775		252	3.785	24.675
253	3.37	28.45		253	0.135	0.89		253	3.035	25.66
254	4.355	24.025		254	0.2	0.795		254	3.8	21.6
255	8.445	23.095		255	0.36	0.84		255	7.445	20.77
256	9.71	23.43		256	0.415	0.845		256	8.575	21.005
257	3.115	20.035		257	0.185	0.745		257	2.71	17.83
258	0.575	18.6		258	0.03	0.615		258	0.49	16.815
259	2.595	22.35		259	0.13	0.675		259	2.295	20.405
260	5.545	24.02		260	0.255	0.78		260	4.895	21.63
261	3.92	24.265		261	0.135	0.81		261	3.58	21.77
262	0.51	25.225		262	0.02	0.68		262	0.465	23.215
263	3.895	25.665		263	0.2	0.83		263	3.425	23.16
264	2.315	19.01		264	0.125	0.6		264	2.035	17.19
265	0.365	23.79		265	0.005	0.835		265	0.355	21.285
266	8.585	29.04		266	0.465	0.825		266	7.37	26.545
267	4.255	26.995		267	0.165	0.815		267	3.8	24.64
268	1.82	12.035		268	0.14	0.565		268	1.5	10.42
269	1.685	28.69		269	0.08	0.865		269	1.49	25.99
270	0.785	10.445		270	0.02	0.525		270	0.73	9.055
271	0.8	28.335		271	0.02	0.785		271	0.735	25.845
272	2.185	15.04		272	0.085	0.61		272	1.94	13.335
273	1.555	16.98		273	0.085	0.53		273	1.36	15.45
274	1.625	21.845		274	0.1	0.855		274	1.395	19.31
275	4.615	21.07		275	0.18	0.75		275	4.155	18.87
276	1.895	20.14		276	0.1	0.815		276	1.68	17.7
277	0.595	24.755		277	0.025	0.875		277	0.54	22.175
278	4.035	23.88		278	0.215	0.93		278	3.49	21.335
279	1.555	23.16		279	0.055	0.71		279	1.445	21.085
280	1.185	16.535		280	0.07	0.725		280	1.01	14.465
281	2.015	20.655		281	0.11	0.86		281	1.75	18.245
282	4.375	16.9		282	0.195	0.65		282	3.885	15.065
283	2.6	16.275		283	0.15	0.715		283	2.205	14.245
284	0.77	12.825		284	0.035	0.465		284	0.69	11.445
285	0.475	23.845		285	0.02	0.755		285	0.43	21.615
286	1.64	19.075		286	0.055	0.785		286	1.52	16.745
287	1.09	11.035		287	0.065	0.52		287	0.925	9.555
288	1.06	25.83		288	0.055	1.03		288	0.95	22.815
289	0.44	20.535		289	0.04	0.86		289	0.355	18.185
290	1.92	12.795		290	0.115	0.56		290	1.63	11.3
291	0.345	16.415		291	0.04	0.685		291	0.275	14.425
292	8.21	26.975		292	0.4	0.825		292	7.135	24.52
293	2.495	17.38		293	0.11	0.765		293	2.215	15.225
294	3.97	16.88		294	0.195	0.78		294	3.505	14.595
295	2.94	27.285		295	0.125	1.05		295	2.635	24.225
296	2.65	13.89		296	0.15	0.68		296	2.265	12.02
297	2.265	20.555		297	0.11	0.74		297	1.99	18.5
298	0.97	20.61		298	0.055	0.68		298	0.855	18.49
299	0.64	27.52		299	0.035	0.88		299	0.55	24.795
300	6.945	29.945		300	0.35	1.05		300	5.99	26.92
301	3.86	23.135		301	0.19	0.72		301	3.385	20.99
302	3.22	15.29		302	0.18	0.575		302	2.76	13.63
303	1.285	17.375		303	0.09	0.705		303	1.085	15.29
304	4.69	29.13		304	0.22	0.79		304	4.16	26.715
305	1.75	11.145		305	0.115	0.565		305	1.445	9.545
306	5.485	21.52		306	0.275	0.91		306	4.815	19.025
307	6.25	28.33		307	0.37	0.77		307	5.35	25.96
308	4.65	23.085		308	0.215	0.66		308	4.105	21.05
309	1.94	17.36		309	0.1	0.63		309	1.73	15.515
310	0.93	15.08		310	0.055	0.52		310	0.805	13.68
311	2.235	15.8		311	0.135	0.64		311	1.91	14.03
312	2.92	26.07		312	0.085	0.835		312	2.705	23.57
313	1.86	21.28		313	0.11	0.81		313	1.605	19.08
314	3.985	27.81		314	0.22	0.8		314	3.415	25.365
315	4.21	20.2		315	0.155	0.585		315	3.825	18.475
316	2.395	15.03		316	0.12	0.63		316	2.075	13.27
317	4.925	16.825		317	0.24	0.68		317	4.31	14.96
318	6.16	17.84		318	0.285	0.77		318	5.42	15.605
319	1.215	22.75		319	0.05	0.79		319	1.095	20.325
320	4.33	19.27		320	0.215	0.69		320	3.765	17.405
321	2.945	20.02		321	0.15	0.795		321	2.585	17.72
322	10.695	29.835		322	0.575	0.785		322	9.08	27.485
323	1.83	20.09		323	0.1	0.835		323	1.59	17.875
324	2.64	23.69		324	0.12	0.865		324	2.315	21.145
325	2.74	25.075		325	0.165	0.83		325	2.3	22.56
326	0.94	14.55		326	0.07	0.65		326	0.775	12.725
327	1.575	16.05		327	0.09	0.645		327	1.36	14.25
328	4.9	16.07		328	0.255	0.675		328	4.28	14.2
329	2.18	23.67		329	0.07	0.57		329	1.985	21.945
330	3.04	18.155		330	0.14	0.655		330	2.7	16.27
331	3.61	15.885		331	0.215	0.65		331	3.02	13.95
332	0.57	9.1		332	0.03	0.475		332	0.505	7.81
333	4.9	22.655		333	0.245	0.855		333	4.285	20.085
334	2.53	19.125		334	0.135	0.805		334	2.205	16.85
335	1.92	28.8		335	0.085	1.08		335	1.72	25.625
336	2.045	29.045		336	0.13	0.775		336	1.765	26.655
337	2.915	28.125		337	0.16	0.765		337	2.525	25.75
338	3.39	26.16		338	0.18	0.94		338	2.94	23.37
339	0.78	27.8		339	0.05	0.81		339	0.65	25.185
340	1.615	22.515		340	0.105	0.84		340	1.33	20.115
341	1.545	23.47		341	0.07	0.76		341	1.37	21.235
342	7.7	19.18		342	0.345	0.75		342	6.79	17.025
343	1.485	20.025		343	0.09	0.775		343	1.25	17.79
344	3.84	21.025		344	0.17	0.635		344	3.355	19.11
345	0.765	30.465		345	0.04	1.03		345	0.655	27.32
346	8.52	20.385		346	0.485	0.91		346	7.24	18
347	1.69	24		347	0.055	0.785		347	1.545	21.55
348	0.49	10.09		348	0.025	0.505		348	0.435	8.665
349	2.565	16.7		349	0.1	0.63		349	2.305	14.85
350	0.855	26.85		350	0.045	0.845		350	0.745	24.1
351	0.65	24.2		351	0.015	0.88		351	0.61	21.63
352	1.67	21		352	0.09	0.8		352	1.46	18.765
353	4.1	27.62		353	0.205	0.915		353	3.605	24.65
354	1.475	20.02		354	0.08	0.685		354	1.255	17.9
355	1.8	17.955		355	0.08	0.695		355	1.61	16.04
356	2.67	22.64		356	0.12	0.99		356	2.355	19.905
357	0.865	16.46		357	0.04	0.64		357	0.77	14.615
358	0.965	21.975		358	0.01	0.685		358	0.945	19.9
359	1.78	16.55		359	0.11	0.73		359	1.515	14.495
360	1.715	20.855		360	0.055	0.605		360	1.575	19.05
361	5.98	16.605		361	0.295	0.565		361	5.185	14.98
362	2.44	23.735		362	0.13	0.965		362	2.115	20.855
363	2.295	15.215		363	0.13	0.64		363	1.965	13.475
364	3.83	19.66		364	0.13	0.845		364	3.5	17.28
365	1.96	11.025		365	0.12	0.475		365	1.67	9.75
366	2.795	15.755		366	0.175	0.695		366	2.395	13.79
367	10.515	22.925		367	0.525	1.065		367	9.075	19.995
368	0.87	10.555		368	0.07	0.63		368	0.705	8.88
369	1.785	22.555		369	0.075	0.62		369	1.615	20.66
370	1.09	11.16		370	0.06	0.46		370	0.94	9.97
371	1.25	18.82		371	0.04	0.61		371	1.155	17.06
372	1.845	20.15		372	0.09	0.7		372	1.605	18.21
373	1.595	22.57		373	0.06	0.765		373	1.455	20.29
374	1.325	13.635		374	0.075	0.645		374	1.155	11.98
375	3.745	23.05		375	0.255	0.805		375	3.195	20.71
376	1.725	18.135		376	0.085	0.78		376	1.535	15.825
377	1.605	21.575		377	0.09	0.79		377	1.36	19.37
378	0.695	24.76		378	0.05	0.755		378	0.59	22.47
379	1.45	20.415		379	0.07	0.84		379	1.285	18.11
380	1.745	10.21		380	0.065	0.5		380	1.59	8.94
381	4.24	18.365		381	0.19	0.785		381	3.7	16.31
382	2.95	15.125		382	0.125	0.695		382	2.605	13.155
383	1.06	13.75		383	0.035	0.65		383	0.965	11.905
384	5.73	25.035		384	0.235	0.715		384	5.135	22.89
385	1.58	14.955		385	0.075	0.585		385	1.41	13.345
386	0.755	18		386	0.025	0.685		386	0.7	16.025
387	2.57	29		387	0.1	0.895		387	2.345	26.415
388	2.315	29.65		388	0.1	0.94		388	2.1	26.88
389	8.61	22.175		389	0.435	0.98		389	7.455	19.31
390	2.4	18.94		390	0.115	0.69		390	2.08	17.065
391	5.17	19.45		391	0.22	0.855		391	4.64	16.96
392	5.755	25.725		392	0.24	0.895		392	5.135	22.96
393	0.56	21.725		393	0.005	0.79		393	0.545	19.45
394	5.335	19.16		394	0.23	0.8		394	4.73	16.94
395	1.44	13.98		395	0.065	0.665		395	1.28	12.16
396	1.645	18.9		396	0.095	0.57		396	1.445	17.29
397	1.9	12.075		397	0.12	0.605		397	1.615	10.485
398	3.175	23.01		398	0.18	0.835		398	2.75	20.51
399	1.165	15.235		399	0.075	0.66		399	0.97	13.32
400	4.115	21.91		400	0.215	0.735		400	3.535	19.595
401	6.265	22.21		401	0.275	0.795		401	5.63	20.11
402	0.97	24.745		402	0.04	0.87		402	0.875	22.135
403	1.165	11.46		403	0.09	0.6		403	0.945	9.815
404	2.55	31.765		404	0.12	1.045		404	2.235	28.555
405	3.8	25.565		405	0.22	0.885		405	3.29	22.96
406	4.035	23.815		406	0.195	0.98		406	3.52	21.01
407	3.72	30.435		407	0.17	0.85		407	3.305	27.895
408	5.05	24.75		408	0.285	0.87		408	4.37	22.075
409	5.4	24.905		409	0.25	0.7		409	4.765	22.795
410	3.745	22.385		410	0.155	0.64		410	3.315	20.48
411	1.56	29.22		411	0.09	0.905		411	1.335	26.44
412	1.685	23.23		412	0.07	0.71		412	1.52	21.125
413	2.145	14.885		413	0.085	0.62		413	1.955	13.145
414	0.89	13.775		414	0.045	0.675		414	0.79	11.955
415	0.7	31.06		415	0.035	0.96		415	0.61	28.185
416	2.61	20.895		416	0.17	0.88		416	2.27	18.295
417	1.24	11.74		417	0.055	0.6		417	1.1	10.035
418	5.245	23.795		418	0.23	0.915		418	4.67	21.085
419	2.18	12.925		419	0.12	0.535		419	1.905	11.445
420	0.995	11.22		420	0.045	0.535		420	0.9	9.89
421	5.72	17.025		421	0.315	0.695		421	4.885	15.06
422	0.835	18.425		422	0.03	0.535		422	0.76	16.835
423	1.935	14.665		423	0.105	0.565		423	1.655	13.045
424	0.675	25.4		424	0.03	0.855		424	0.605	22.87
425	1.425	16.045		425	0.095	0.685		425	1.205	14
426	1.425	22.795		426	0.065	0.785		426	1.27	20.58
427	3.115	15.38		427	0.165	0.75		427	2.685	13.3
428	4.67	27.52		428	0.21	0.69		428	4.135	25.49
429	7.075	19		429	0.31	0.63		429	6.255	17.075
430	3.185	20.66		430	0.19	0.775		430	2.7	18.405
431	10.905	26.62		431	0.575	0.87		431	9.335	24.13
432	0.97	17.275		432	0.06	0.695		432	0.845	15.31
433	13.55	26.59		433	0.645	1.015		433	11.87	23.58
434	0.615	26.075		434	0.025	0.825		434	0.56	23.695
435	3.64	27.425		435	0.23	0.79		435	3.025	24.96
436	5.06	19.43		436	0.26	0.87		436	4.44	16.945
437	0.575	28.565		437	0.015	0.93		437	0.54	25.79
438	7.445	19.205		438	0.355	0.75		438	6.535	17.085
439	0.685	16.45		439	0.01	0.645		439	0.665	14.63
440	3.23	29.41		440	0.16	0.82		440	2.845	26.835
441	1.145	11.025		441	0.035	0.47		441	1.055	9.685
442	3.115	28.155		442	0.125	0.865		442	2.785	25.545
443	11.035	22.77		443	0.515	0.78		443	9.57	20.535
444	3.06	19.575		444	0.17	0.65		444	2.63	17.635
445	4.2	24.78		445	0.18	0.875		445	3.68	22.13
446	2.1	24.52		446	0.11	0.76		446	1.83	22.345
447	2.705	13.645		447	0.15	0.55		447	2.35	12.145
448	2.375	14.415		448	0.145	0.635		448	2.025	12.665
449	1.625	11.34		449	0.055	0.45		449	1.505	10.12
450	1.29	12.44		450	0.055	0.495		450	1.145	11.09
451	1.95	22.235		451	0.075	0.86		451	1.775	19.79
452	3.145	16.645		452	0.185	0.67		452	2.67	14.78
453	1.635	26.425		453	0.12	0.92		453	1.335	23.57
454	5.115	23.28		454	0.26	0.75		454	4.41	21.03
455	0.145	19.32		455	0.01	0.73		455	0.12	17.1
456	1.15	20.51		456	0.045	0.97		456	1.055	17.765
457	6.62	21.805		457	0.315	0.775		457	5.81	19.65
458	0.565	27.93		458	0.04	0.72		458	0.49	25.665
459	0.92	23.925		459	0.055	0.69		459	0.79	21.785
460	0.67	18.575		460	0.045	0.865		460	0.56	16.26
461	4.065	21.71		461	0.16	0.655		461	3.67	19.79
462	4.145	18.39		462	0.19	0.715		462	3.615	16.3
463	3.365	14.09		463	0.165	0.595		463	2.95	12.51
464	1.205	15.8		464	0.055	0.665		464	1.075	13.985
465	2.66	20.57		465	0.125	0.8		465	2.325	18.135
466	1.895	27.83		466	0.085	1.045		466	1.71	24.78
467	1.185	16.57		467	0.055	0.705		467	1.06	14.5
468	2.83	22.655		468	0.15	0.835		468	2.475	20.25
469	6.65	20.155		469	0.3	0.805		469	5.88	17.775
470	0.37	18.79		470	0.035	0.595		470	0.3	17.07
471	0.725	23.945		471	0.015	0.715		471	0.685	21.74
472	3.66	25.13		472	0.235	0.895		472	3.105	22.415
473	1.295	14.68		473	0.05	0.67		473	1.18	12.865
474	3.445	28.53		474	0.125	0.83		474	3.135	26.125
475	2.2	22.77		475	0.095	0.715		475	1.96	20.65
476	0.55	18.22		476	0.015	0.73		476	0.515	16.135
477	1.77	23.92		477	0.075	0.75		477	1.585	21.55
478	4.025	15.235		478	0.19	0.62		478	3.53	13.435
479	1.495	24.52		479	0.08	0.75		479	1.295	22.21
480	1.81	19.285		480	0.105	0.6		480	1.55	17.58
481	3.39	15.8		481	0.15	0.63		481	3.04	14.025
482	1.985	18.585		482	0.085	0.805		482	1.79	16.345
483	1.26	18.45		483	0.1	0.825		483	1.01	16.13
484	2.21	26.96		484	0.125	0.885		484	1.915	24.26
485	4.635	17.725		485	0.205	0.68		485	4.055	15.695
486	0.995	9.985		486	0.06	0.415		486	0.875	8.85
487	2.975	26.105		487	0.13	0.74		487	2.66	23.955
488	0.77	22.035		488	0.02	0.76		488	0.72	19.81
489	2.505	16.18		489	0.155	0.67		489	2.17	14.25
490	0.9	13.97		490	0.055	0.635		490	0.76	12.295
491	0.69	13.5		491	0.03	0.49		491	0.625	12.165
492	1.175	21.99		492	0.065	0.77		492	1.02	19.825
493	5.585	25.085		493	0.29	0.88		493	4.79	22.56
494	4.96	21.98		494	0.23	0.715		494	4.375	19.915
495	0.5	20.45		495	0.03	0.865		495	0.415	17.87
496	3.54	15.875		496	0.15	0.55		496	3.19	14.315
497	5.16	29.05		497	0.255	0.925		497	4.47	26.335
498	1.51	18.345		498	0.11	0.9		498	1.225	15.86
499	1.7	19.14		499	0.095	0.82		499	1.45	16.685
500	4.345	15.87		500	0.175	0.515		500	3.92	14.395
MEAN	2.94197	20.815		MEAN	0.14379	0.74285		MEAN	2.57796	18.6498
SD	2.21958	5.4105		SD	0.107861	0.136276		SD	1.93635	5.04352

## Sheet: Fig 5L 5M 5N
Fig 5L - In Silico - Drop GABA & Increase Adaptation Current - All				Fig 5M - In Silico - Drop GABA & Increase Adaptation Current - Burst				Fig 5N - In Silico - Drop GABA & Increase Adaptation Current - Single
	Firing Rate (spikes/s)				Firing (bursts/s)				Firing Rate (spikes/s)
Model Neuron	BL	↓ GABA + ↑ Adapt.		Model Neuron	BL	↓ GABA + ↑ Adapt.		Model Neuron	BL	↓ GABA + ↑ Adapt.
1	4.415	11.86		1	0.215	0.11		1	3.855	11.625
2	8.48	8.18		2	0.36	0.01		2	7.495	8.16
3	2.745	6.26		3	0.11	0		3	2.49	6.26
4	2.445	6.725		4	0.11	0.005		4	2.185	6.715
5	1.31	6.925		5	0.07	0		5	1.165	6.925
6	2.675	7.3		6	0.095	0.005		6	2.46	7.29
7	0.635	7.255		7	0.045	0.01		7	0.525	7.235
8	2.12	6.11		8	0.1	0		8	1.84	6.11
9	2.01	8.18		9	0.075	0.01		9	1.835	8.16
10	0.41	8.835		10	0.01	0.005		10	0.39	8.825
11	1.315	5.765		11	0.065	0		11	1.155	5.765
12	1.78	6.81		12	0.09	0		12	1.555	6.81
13	7.925	8.76		13	0.385	0.015		13	6.885	8.73
14	1.155	9.405		14	0.06	0.055		14	1.01	9.275
15	1.06	7.435		15	0.06	0		15	0.92	7.435
16	3.5	5.35		16	0.18	0		16	3.06	5.35
17	2.935	7.16		17	0.165	0		17	2.51	7.16
18	3.765	12.72		18	0.215	0.14		18	3.295	12.41
19	1.475	9.515		19	0.07	0.045		19	1.31	9.42
20	1.725	6.805		20	0.065	0		20	1.57	6.805
21	5.185	12.095		21	0.23	0.07		21	4.62	11.94
22	1.725	6.99		22	0.06	0		22	1.59	6.99
23	2.48	7.03		23	0.13	0.005		23	2.15	7.02
24	1.53	13.105		24	0.085	0.125		24	1.33	12.8
25	0.37	6.61		25	0.015	0		25	0.34	6.61
26	2.43	6.86		26	0.145	0		26	2.11	6.86
27	2.565	6.115		27	0.125	0		27	2.255	6.115
28	3.13	5.325		28	0.145	0		28	2.805	5.325
29	2.125	6.86		29	0.08	0		29	1.945	6.86
30	8.69	7.11		30	0.345	0		30	7.71	7.11
31	2.17	5.875		31	0.12	0		31	1.87	5.875
32	1.57	7.62		32	0.06	0.005		32	1.42	7.61
33	0.685	9.9		33	0.04	0.045		33	0.59	9.805
34	2.525	11.975		34	0.155	0.12		34	2.165	11.72
35	1.32	6.805		35	0.065	0		35	1.165	6.805
36	2.445	6.565		36	0.115	0		36	2.165	6.565
37	6.77	10.75		37	0.315	0.08		37	5.89	10.57
38	3.585	10.455		38	0.225	0.04		38	3.045	10.375
39	0.75	5.255		39	0.04	0		39	0.66	5.255
40	0.8	5.23		40	0.045	0		40	0.69	5.23
41	1.66	5.49		41	0.1	0		41	1.425	5.49
42	2.67	10.185		42	0.125	0.02		42	2.35	10.145
43	2.695	8.15		43	0.125	0.005		43	2.395	8.14
44	5.1	6.025		44	0.235	0		44	4.53	6.025
45	1.015	8.715		45	0.05	0.005		45	0.9	8.705
46	1.395	8.615		46	0.09	0.04		46	1.175	8.535
47	3.555	6.91		47	0.19	0.005		47	3.08	6.9
48	6.68	5.47		48	0.305	0		48	5.87	5.47
49	3.39	5.705		49	0.17	0		49	2.965	5.705
50	6.19	9.635		50	0.225	0.055		50	5.58	9.52
51	5.03	5.225		51	0.225	0		51	4.51	5.225
52	1.91	9.095		52	0.09	0.005		52	1.685	9.085
53	4.775	9.96		53	0.22	0.025		53	4.155	9.905
54	1.64	5.855		54	0.11	0		54	1.36	5.855
55	1.235	6.43		55	0.095	0		55	1.025	6.43
56	1.545	7.02		56	0.065	0		56	1.4	7.02
57	4.275	5.58		57	0.185	0		57	3.81	5.58
58	2.405	6.08		58	0.085	0		58	2.19	6.08
59	1.515	8.565		59	0.12	0		59	1.26	8.565
60	4.315	5.29		60	0.205	0		60	3.82	5.29
61	3.775	11.795		61	0.215	0.12		61	3.2	11.54
62	0.305	5.705		62	0.015	0		62	0.275	5.705
63	2.345	8.475		63	0.135	0.02		63	2.02	8.435
64	6.115	5.695		64	0.36	0		64	5.2	5.695
65	3.01	6.86		65	0.175	0		65	2.55	6.86
66	5.365	8.575		66	0.305	0.02		66	4.605	8.535
67	2.115	13.09		67	0.095	0.18		67	1.875	12.68
68	2.085	10.66		68	0.13	0.08		68	1.76	10.49
69	3.045	6.33		69	0.13	0.005		69	2.73	6.32
70	0.9	8.01		70	0.05	0.005		70	0.78	8
71	2.265	7.54		71	0.14	0.005		71	1.96	7.53
72	4.135	9.315		72	0.215	0.025		72	3.58	9.265
73	5.285	7.455		73	0.255	0		73	4.605	7.455
74	8.04	9.655		74	0.335	0.01		74	7.09	9.635
75	3.365	6.21		75	0.17	0		75	2.9	6.21
76	6.755	5.32		76	0.355	0		76	5.79	5.32
77	0.235	6.855		77	0.005	0		77	0.225	6.855
78	9.53	9.745		78	0.49	0.035		78	8.195	9.67
79	1.815	5.66		79	0.1	0		79	1.59	5.66
80	1.315	8.34		80	0.045	0		80	1.21	8.34
81	2.82	5.77		81	0.15	0		81	2.49	5.77
82	0.99	11.025		82	0.05	0.05		82	0.86	10.915
83	3	6.58		83	0.125	0		83	2.675	6.58
84	0.81	6.615		84	0.03	0		84	0.74	6.615
85	2.645	5.67		85	0.145	0		85	2.275	5.67
86	4.12	12.545		86	0.225	0.11		86	3.595	12.295
87	2.895	8.825		87	0.12	0.02		87	2.605	8.78
88	5.315	5.945		88	0.26	0		88	4.645	5.945
89	2.415	6.195		89	0.16	0		89	2.035	6.195
90	0.23	6.305		90	0.01	0.005		90	0.205	6.295
91	1.985	12.185		91	0.09	0.14		91	1.765	11.875
92	2.25	6.335		92	0.07	0		92	2.08	6.335
93	1.695	9.155		93	0.065	0.015		93	1.54	9.125
94	1.485	6.54		94	0.095	0		94	1.255	6.54
95	2.795	6.92		95	0.14	0		95	2.465	6.92
96	4.1	10.425		96	0.23	0.06		96	3.535	10.29
97	1.75	5.82		97	0.07	0		97	1.59	5.82
98	2.345	6.685		98	0.175	0		98	1.935	6.685
99	1.5	7.05		99	0.095	0		99	1.255	7.05
100	1.59	10.38		100	0.06	0.04		100	1.44	10.295
101	3.305	7.56		101	0.135	0		101	2.95	7.56
102	3.635	11.835		102	0.165	0.055		102	3.21	11.715
103	4.645	9.12		103	0.225	0.025		103	4.025	9.07
104	1.61	6.79		104	0.09	0		104	1.365	6.79
105	0.275	8.24		105	0.01	0.01		105	0.255	8.22
106	0.725	5.44		106	0.035	0		106	0.655	5.44
107	4.04	7.46		107	0.225	0		107	3.465	7.46
108	1.85	10.07		108	0.04	0.025		108	1.755	10.02
109	0.795	6.435		109	0.005	0		109	0.78	6.435
110	1.325	11.025		110	0.07	0.035		110	1.165	10.95
111	1.72	14.475		111	0.09	0.16		111	1.495	14.07
112	5.405	9.705		112	0.245	0.005		112	4.74	9.695
113	3.235	5.435		113	0.14	0		113	2.855	5.435
114	6.46	11.775		114	0.32	0.11		114	5.63	11.53
115	1.62	11.405		115	0.07	0.125		115	1.47	11.135
116	2.31	9.36		116	0.14	0.035		116	1.96	9.275
117	1.095	7.04		117	0.04	0		117	1.005	7.04
118	6.36	8.67		118	0.35	0		118	5.415	8.67
119	5.01	12.03		119	0.295	0.16		119	4.25	11.67
120	1.88	7.285		120	0.06	0.01		120	1.73	7.265
121	8.07	9.235		121	0.35	0.02		121	7.15	9.19
122	1.13	6.275		122	0.045	0		122	1.03	6.275
123	2.21	6.515		123	0.105	0		123	1.965	6.515
124	1.355	6.665		124	0.085	0		124	1.145	6.665
125	7.585	7.96		125	0.36	0.005		125	6.73	7.95
126	2.3	5.745		126	0.14	0		126	1.97	5.745
127	0.885	6.15		127	0.045	0		127	0.785	6.15
128	1.725	6.215		128	0.09	0		128	1.52	6.215
129	10.5	5.87		129	0.415	0		129	9.37	5.87
130	0.475	5.4		130	0.01	0		130	0.45	5.4
131	0.315	8.77		131	0.005	0.06		131	0.305	8.63
132	1.705	5.785		132	0.085	0		132	1.49	5.785
133	5.5	6.175		133	0.27	0		133	4.78	6.175
134	0.66	11.505		134	0.055	0.075		134	0.53	11.35
135	8.655	5.78		135	0.38	0		135	7.65	5.78
136	5.93	6.26		136	0.26	0		136	5.26	6.26
137	1.9	5.6		137	0.12	0		137	1.595	5.6
138	1.915	13.415		138	0.075	0.12		138	1.725	13.125
139	4.095	5.705		139	0.215	0		139	3.55	5.705
140	0.82	6.985		140	0.055	0		140	0.715	6.985
141	1.68	13.515		141	0.075	0.175		141	1.49	13.07
142	7.505	6.475		142	0.365	0		142	6.53	6.475
143	3.87	11.135		143	0.18	0.085		143	3.43	10.955
144	1.49	5.595		144	0.08	0		144	1.295	5.595
145	4.925	7.505		145	0.245	0		145	4.295	7.505
146	3.885	9.335		146	0.195	0.035		146	3.36	9.265
147	2.15	6.195		147	0.11	0		147	1.915	6.195
148	0.77	7.215		148	0.03	0		148	0.705	7.215
149	5.625	6.465		149	0.315	0		149	4.865	6.465
150	1.955	7.87		150	0.09	0.01		150	1.725	7.85
151	0.7	5.61		151	0.02	0		151	0.645	5.61
152	4.095	12.99		152	0.225	0.12		152	3.535	12.72
153	2.86	11.175		153	0.16	0.085		153	2.455	10.99
154	1.195	5.16		154	0.045	0		154	1.075	5.16
155	2.37	7.155		155	0.085	0		155	2.175	7.155
156	3.83	8.7		156	0.18	0.02		156	3.43	8.66
157	2.055	5.435		157	0.14	0		157	1.71	5.435
158	1.23	6.32		158	0.065	0		158	1.09	6.32
159	5.375	7.29		159	0.31	0		159	4.56	7.29
160	0.87	5.325		160	0.025	0		160	0.82	5.325
161	3.145	5.45		161	0.14	0		161	2.8	5.45
162	4.04	13.765		162	0.215	0.225		162	3.45	13.235
163	1.865	6.89		163	0.12	0		163	1.605	6.89
164	1.125	5.84		164	0.04	0		164	1.045	5.84
165	1.33	7.385		165	0.11	0		165	1.065	7.385
166	3.34	11.335		166	0.16	0.155		166	2.905	10.99
167	7.06	7.19		167	0.305	0		167	6.21	7.19
168	1.94	5.56		168	0.09	0		168	1.73	5.56
169	6.16	7.825		169	0.305	0		169	5.28	7.825
170	0.78	7.63		170	0.045	0		170	0.655	7.63
171	6.37	5.295		171	0.265	0		171	5.58	5.295
172	0.79	9.79		172	0.04	0.01		172	0.7	9.77
173	4.915	7.035		173	0.19	0		173	4.47	7.035
174	6.325	8.33		174	0.325	0		174	5.495	8.33
175	2.31	9.035		175	0.08	0.03		175	2.135	8.975
176	2.52	6.405		176	0.13	0		176	2.215	6.405
177	3.285	7.11		177	0.17	0		177	2.85	7.11
178	3.16	12.295		178	0.145	0.09		178	2.75	12.085
179	4.585	9.66		179	0.19	0.025		179	4.155	9.605
180	3.815	10.015		180	0.185	0.03		180	3.33	9.955
181	2.485	5.61		181	0.105	0		181	2.23	5.61
182	3.61	8.095		182	0.15	0.005		182	3.235	8.085
183	3.575	6.3		183	0.16	0		183	3.13	6.3
184	1.27	6.515		184	0.085	0		184	1.065	6.515
185	1.595	6.02		185	0.065	0		185	1.42	6.02
186	3.505	5.995		186	0.155	0		186	3.115	5.995
187	6.485	5.15		187	0.325	0		187	5.62	5.15
188	0.515	6.71		188	0.03	0		188	0.43	6.71
189	1.605	9.21		189	0.095	0.06		189	1.385	9.07
190	8.445	6.45		190	0.385	0		190	7.445	6.45
191	0.725	5.84		191	0.025	0		191	0.66	5.84
192	6.96	10.735		192	0.395	0.095		192	5.945	10.505
193	1.165	6.56		193	0.05	0		193	1.04	6.56
194	2.46	5.845		194	0.14	0		194	2.115	5.845
195	3.05	6.43		195	0.16	0		195	2.65	6.43
196	1.03	5.865		196	0.03	0		196	0.955	5.865
197	5.21	7.645		197	0.22	0.005		197	4.65	7.635
198	1.395	7.695		198	0.085	0.005		198	1.17	7.685
199	2.96	8.995		199	0.14	0.01		199	2.64	8.975
200	1.65	5.23		200	0.065	0		200	1.49	5.23
201	2.025	5.07		201	0.095	0		201	1.77	5.07
202	5.815	4.215		202	0.205	0		202	5.28	4.215
203	2.095	7.6		203	0.12	0		203	1.83	7.6
204	2.93	6.64		204	0.155	0		204	2.545	6.64
205	2.895	8.795		205	0.175	0.01		205	2.44	8.775
206	0.58	5.52		206	0.035	0		206	0.495	5.52
207	1.035	6.345		207	0.065	0		207	0.865	6.345
208	2.94	7.545		208	0.115	0.005		208	2.675	7.535
209	2.995	7.98		209	0.165	0		209	2.605	7.98
210	2.47	7.155		210	0.125	0		210	2.175	7.155
211	5.79	14.455		211	0.345	0.215		211	4.96	13.885
212	3.065	7.53		212	0.13	0		212	2.735	7.53
213	1.95	11.1		213	0.09	0.055		213	1.74	10.985
214	1.47	7.395		214	0.06	0		214	1.335	7.395
215	1.635	8.62		215	0.06	0.045		215	1.49	8.525
216	0.515	10.395		216	0.025	0.055		216	0.465	10.285
217	8.905	6.12		217	0.42	0		217	7.775	6.12
218	1.49	8.785		218	0.055	0.01		218	1.36	8.765
219	1.09	8.12		219	0.09	0.005		219	0.87	8.11
220	2.615	5.37		220	0.115	0		220	2.335	5.37
221	4.575	8.725		221	0.225	0.005		221	4.005	8.715
222	4.21	10.385		222	0.195	0.045		222	3.72	10.295
223	1.625	5.96		223	0.075	0		223	1.45	5.96
224	0.325	6.92		224	0.02	0.015		224	0.285	6.885
225	1.875	5.75		225	0.09	0		225	1.655	5.75
226	8.54	7.525		226	0.385	0		226	7.545	7.525
227	3.355	8.18		227	0.195	0.025		227	2.875	8.13
228	2.69	7.095		228	0.125	0		228	2.37	7.095
229	4.175	5.365		229	0.24	0		229	3.59	5.365
230	1.165	8.015		230	0.07	0.005		230	1.01	8.005
231	1.85	5.465		231	0.115	0		231	1.56	5.465
232	1.6	7.23		232	0.075	0		232	1.43	7.23
233	1.675	7.2		233	0.11	0		233	1.375	7.2
234	1.28	10.2		234	0.055	0.09		234	1.145	9.995
235	2.01	6.035		235	0.08	0		235	1.81	6.035
236	11.635	6.16		236	0.465	0		236	10.31	6.16
237	3.245	9.84		237	0.18	0.01		237	2.79	9.82
238	1.33	6.965		238	0.06	0		238	1.19	6.965
239	6.05	7.645		239	0.36	0		239	5.07	7.645
240	5.365	7.995		240	0.21	0		240	4.78	7.995
241	1.465	8.265		241	0.06	0.005		241	1.32	8.255
242	3.605	10.48		242	0.18	0.055		242	3.16	10.37
243	2.775	5.89		243	0.13	0		243	2.455	5.89
244	6.595	9.025		244	0.355	0.015		244	5.66	8.995
245	2.05	7.425		245	0.055	0		245	1.905	7.425
246	2.045	8.2		246	0.095	0.01		246	1.855	8.18
247	0.395	8.7		247	0.02	0.06		247	0.355	8.575
248	1.4	8.365		248	0.055	0		248	1.25	8.365
249	0.825	6.65		249	0.07	0		249	0.655	6.65
250	8.835	5.975		250	0.51	0		250	7.5	5.975
251	5.99	8.775		251	0.25	0.005		251	5.34	8.765
252	4.545	6.29		252	0.275	0		252	3.785	6.29
253	3.37	13.505		253	0.135	0.155		253	3.035	13.145
254	4.355	6.48		254	0.2	0		254	3.8	6.48
255	8.445	6.495		255	0.36	0		255	7.445	6.495
256	9.71	5.96		256	0.415	0		256	8.575	5.96
257	3.115	8.4		257	0.185	0.005		257	2.71	8.39
258	0.575	7.155		258	0.03	0		258	0.49	7.155
259	2.595	7.275		259	0.13	0		259	2.295	7.275
260	5.545	6.275		260	0.255	0		260	4.895	6.275
261	3.92	10.115		261	0.135	0.045		261	3.58	10.02
262	0.51	5.75		262	0.02	0		262	0.465	5.75
263	3.895	6.865		263	0.2	0		263	3.425	6.865
264	2.315	5.685		264	0.125	0		264	2.035	5.685
265	0.365	5.84		265	0.005	0		265	0.355	5.84
266	8.585	8.065		266	0.465	0		266	7.37	8.065
267	4.255	9.93		267	0.165	0.03		267	3.8	9.865
268	1.82	7.08		268	0.14	0.02		268	1.5	7.04
269	1.685	10.55		269	0.08	0.03		269	1.49	10.48
270	0.785	5.41		270	0.02	0		270	0.73	5.41
271	0.8	8.205		271	0.02	0.01		271	0.735	8.185
272	2.185	6.52		272	0.085	0		272	1.94	6.52
273	1.555	6.79		273	0.085	0		273	1.36	6.79
274	1.625	5.985		274	0.1	0		274	1.395	5.985
275	4.615	4.895		275	0.18	0		275	4.155	4.895
276	1.895	8.76		276	0.1	0.005		276	1.68	8.75
277	0.595	7.93		277	0.025	0.01		277	0.54	7.91
278	4.035	9.355		278	0.215	0.025		278	3.49	9.305
279	1.555	7.835		279	0.055	0		279	1.445	7.835
280	1.185	5.51		280	0.07	0		280	1.01	5.51
281	2.015	6.415		281	0.11	0		281	1.75	6.415
282	4.375	5.85		282	0.195	0		282	3.885	5.85
283	2.6	7.55		283	0.15	0.02		283	2.205	7.51
284	0.77	7.02		284	0.035	0.005		284	0.69	7.01
285	0.475	5.465		285	0.02	0		285	0.43	5.465
286	1.64	7.33		286	0.055	0		286	1.52	7.33
287	1.09	4.92		287	0.065	0		287	0.925	4.92
288	1.06	7.31		288	0.055	0		288	0.95	7.31
289	0.44	7.445		289	0.04	0		289	0.355	7.445
290	1.92	7.115		290	0.115	0.005		290	1.63	7.105
291	0.345	6.475		291	0.04	0		291	0.275	6.475
292	8.21	8.95		292	0.4	0.005		292	7.135	8.94
293	2.495	6.045		293	0.11	0		293	2.215	6.045
294	3.97	6.71		294	0.195	0		294	3.505	6.71
295	2.94	14.445		295	0.125	0.23		295	2.635	13.91
296	2.65	5.465		296	0.15	0		296	2.265	5.465
297	2.265	8.17		297	0.11	0.005		297	1.99	8.16
298	0.97	5.655		298	0.055	0		298	0.855	5.655
299	0.64	6.555		299	0.035	0		299	0.55	6.555
300	6.945	8.98		300	0.35	0.015		300	5.99	8.95
301	3.86	5.7		301	0.19	0		301	3.37	5.7
302	3.22	6.195		302	0.18	0		302	2.76	6.195
303	1.285	5.13		303	0.09	0		303	1.085	5.13
304	4.69	7.83		304	0.22	0		304	4.16	7.83
305	1.75	6.41		305	0.115	0		305	1.445	6.41
306	5.485	9.355		306	0.275	0.035		306	4.815	9.285
307	6.25	7.27		307	0.37	0		307	5.35	7.27
308	4.65	5.7		308	0.215	0		308	4.105	5.7
309	1.94	6.165		309	0.1	0		309	1.73	6.165
310	0.93	5.16		310	0.055	0		310	0.805	5.16
311	2.235	7.895		311	0.135	0.02		311	1.91	7.855
312	2.92	6.065		312	0.085	0		312	2.705	6.065
313	1.86	11.775		313	0.11	0.16		313	1.605	11.41
314	3.985	8.235		314	0.22	0.01		314	3.415	8.215
315	4.21	11.025		315	0.155	0.065		315	3.825	10.89
316	2.395	5.52		316	0.12	0		316	2.075	5.52
317	4.925	7.305		317	0.24	0		317	4.31	7.305
318	6.16	5.59		318	0.285	0		318	5.42	5.59
319	1.215	6.38		319	0.05	0		319	1.095	6.38
320	4.33	6		320	0.215	0		320	3.765	6
321	2.945	11.525		321	0.15	0.125		321	2.585	11.24
322	10.695	5.925		322	0.575	0		322	9.08	5.925
323	1.83	11.975		323	0.1	0.145		323	1.59	11.64
324	2.64	6.11		324	0.12	0		324	2.315	6.11
325	2.74	5.955		325	0.165	0		325	2.3	5.955
326	0.94	7.1		326	0.07	0		326	0.775	7.1
327	1.575	6.395		327	0.09	0		327	1.36	6.395
328	4.9	5.705		328	0.255	0		328	4.28	5.705
329	2.18	6.96		329	0.07	0		329	1.985	6.96
330	3.04	5.01		330	0.14	0		330	2.7	5.01
331	3.61	6.855		331	0.215	0		331	3.02	6.855
332	0.57	5.145		332	0.03	0		332	0.505	5.145
333	4.9	11.18		333	0.245	0.12		333	4.285	10.9
334	2.53	5.72		334	0.135	0		334	2.205	5.72
335	1.92	6.62		335	0.085	0		335	1.72	6.62
336	2.045	6.78		336	0.13	0		336	1.765	6.78
337	2.915	6.75		337	0.16	0		337	2.525	6.75
338	3.39	6.705		338	0.18	0		338	2.94	6.705
339	0.78	7.565		339	0.05	0.005		339	0.65	7.555
340	1.615	9.31		340	0.105	0.025		340	1.33	9.255
341	1.545	7.3		341	0.07	0		341	1.37	7.3
342	7.7	6.265		342	0.345	0		342	6.79	6.265
343	1.485	6.49		343	0.09	0		343	1.25	6.49
344	3.84	6.985		344	0.17	0		344	3.355	6.985
345	0.765	7.215		345	0.04	0		345	0.655	7.215
346	8.52	6.36		346	0.485	0		346	7.24	6.36
347	1.69	5.92		347	0.055	0		347	1.545	5.92
348	0.49	6.495		348	0.025	0.01		348	0.435	6.475
349	2.565	5.595		349	0.1	0		349	2.305	5.595
350	0.855	7.01		350	0.045	0.005		350	0.745	7
351	0.65	6.165		351	0.015	0		351	0.61	6.165
352	1.67	12.7		352	0.09	0.22		352	1.46	12.185
353	4.1	9.07		353	0.205	0.025		353	3.605	9.02
354	1.475	7.11		354	0.08	0		354	1.255	7.11
355	1.8	7.3		355	0.08	0.005		355	1.61	7.29
356	2.67	6.675		356	0.12	0		356	2.355	6.675
357	0.865	4.875		357	0.04	0		357	0.77	4.875
358	0.965	6.17		358	0.01	0		358	0.945	6.17
359	1.78	7.53		359	0.11	0.02		359	1.515	7.49
360	1.715	5.405		360	0.055	0		360	1.575	5.405
361	5.98	5.315		361	0.295	0		361	5.185	5.315
362	2.44	5.795		362	0.13	0		362	2.115	5.795
363	2.295	5.475		363	0.13	0		363	1.965	5.475
364	3.83	6.155		364	0.13	0		364	3.5	6.155
365	1.96	5.23		365	0.12	0		365	1.67	5.23
366	2.795	5.885		366	0.175	0		366	2.385	5.885
367	10.515	7.525		367	0.525	0.005		367	9.075	7.515
368	0.87	5.335		368	0.07	0		368	0.705	5.335
369	1.785	7.835		369	0.075	0		369	1.615	7.835
370	1.09	10.12		370	0.06	0.105		370	0.94	9.88
371	1.25	5.175		371	0.04	0		371	1.155	5.175
372	1.845	9.23		372	0.09	0.01		372	1.605	9.21
373	1.595	7.075		373	0.06	0		373	1.455	7.075
374	1.325	7.245		374	0.075	0.015		374	1.155	7.215
375	3.745	8.285		375	0.255	0.02		375	3.195	8.245
376	1.725	6.015		376	0.085	0		376	1.525	6.015
377	1.605	6.51		377	0.09	0		377	1.36	6.51
378	0.695	5.59		378	0.05	0		378	0.59	5.59
379	1.45	7.09		379	0.07	0		379	1.285	7.09
380	1.745	10.92		380	0.065	0.16		380	1.59	10.54
381	4.24	7.515		381	0.19	0		381	3.7	7.515
382	2.95	7.65		382	0.125	0.01		382	2.605	7.63
383	1.06	6.815		383	0.035	0		383	0.965	6.815
384	5.73	8.84		384	0.235	0.005		384	5.135	8.83
385	1.58	9.905		385	0.075	0.055		385	1.41	9.79
386	0.755	11.02		386	0.025	0.11		386	0.7	10.775
387	2.57	13.24		387	0.1	0.17		387	2.345	12.83
388	2.315	7.295		388	0.1	0		388	2.1	7.295
389	8.61	9.79		389	0.435	0.03		389	7.455	9.725
390	2.4	5.7		390	0.115	0		390	2.08	5.7
391	5.17	5.935		391	0.22	0		391	4.64	5.935
392	5.755	10.35		392	0.24	0.04		392	5.135	10.27
393	0.56	6.59		393	0.005	0		393	0.545	6.59
394	5.335	6.385		394	0.23	0		394	4.73	6.385
395	1.44	6.695		395	0.065	0		395	1.28	6.695
396	1.645	9.59		396	0.095	0.05		396	1.445	9.48
397	1.9	8.88		397	0.12	0.055		397	1.615	8.76
398	3.175	9.05		398	0.18	0.015		398	2.75	9.015
399	1.165	6.215		399	0.075	0		399	0.97	6.215
400	4.115	7.445		400	0.215	0.01		400	3.535	7.425
401	6.265	7.43		401	0.275	0		401	5.63	7.43
402	0.97	7.375		402	0.04	0		402	0.875	7.375
403	1.165	5.185		403	0.09	0		403	0.945	5.185
404	2.55	7.245		404	0.12	0		404	2.235	7.245
405	3.8	13.285		405	0.22	0.15		405	3.29	12.925
406	4.035	11.48		406	0.195	0.11		406	3.52	11.245
407	3.72	8.4		407	0.17	0		407	3.305	8.4
408	5.05	9.205		408	0.285	0.015		408	4.37	9.175
409	5.4	6.455		409	0.25	0		409	4.765	6.455
410	3.745	10.625		410	0.155	0.07		410	3.315	10.47
411	1.56	7		411	0.09	0		411	1.335	7
412	1.685	5.68		412	0.07	0		412	1.52	5.68
413	2.145	5.885		413	0.085	0		413	1.955	5.885
414	0.89	7.465		414	0.045	0.01		414	0.79	7.445
415	0.7	6.865		415	0.035	0		415	0.61	6.865
416	2.61	6.075		416	0.17	0		416	2.27	6.075
417	1.24	7.01		417	0.055	0.005		417	1.1	7
418	5.245	9.845		418	0.23	0.035		418	4.67	9.775
419	2.18	6.07		419	0.12	0		419	1.905	6.07
420	0.995	5.35		420	0.045	0		420	0.9	5.35
421	5.72	6.585		421	0.315	0		421	4.885	6.585
422	0.835	5.38		422	0.03	0		422	0.76	5.38
423	1.935	5.63		423	0.105	0		423	1.655	5.63
424	0.675	7.475		424	0.03	0		424	0.605	7.475
425	1.425	7.205		425	0.095	0		425	1.205	7.205
426	1.425	7.175		426	0.065	0		426	1.27	7.175
427	3.115	6.72		427	0.165	0.005		427	2.685	6.71
428	4.67	7.2		428	0.21	0		428	4.135	7.2
429	7.075	7.665		429	0.31	0.01		429	6.255	7.645
430	3.185	9.325		430	0.19	0.015		430	2.7	9.295
431	10.905	5.935		431	0.575	0		431	9.335	5.935
432	0.97	7.96		432	0.06	0.005		432	0.845	7.95
433	13.55	6.485		433	0.645	0		433	11.87	6.485
434	0.615	10.885		434	0.025	0.035		434	0.56	10.815
435	3.64	10.56		435	0.23	0.065		435	3.025	10.415
436	5.06	8.62		436	0.26	0.015		436	4.44	8.59
437	0.575	7.185		437	0.015	0		437	0.54	7.185
438	7.445	9.475		438	0.355	0.025		438	6.535	9.42
439	0.685	9.11		439	0.01	0.03		439	0.665	9.045
440	3.23	7.29		440	0.16	0		440	2.845	7.29
441	1.145	5.58		441	0.035	0		441	1.055	5.58
442	3.115	6.01		442	0.125	0		442	2.785	6.01
443	11.035	6.33		443	0.515	0		443	9.57	6.33
444	3.06	5.83		444	0.17	0		444	2.63	5.83
445	4.2	7.465		445	0.18	0.005		445	3.68	7.455
446	2.1	8.77		446	0.11	0.025		446	1.83	8.72
447	2.705	7.875		447	0.15	0.025		447	2.35	7.825
448	2.375	7.645		448	0.145	0.005		448	2.025	7.635
449	1.625	9.675		449	0.055	0.075		449	1.505	9.515
450	1.29	5.44		450	0.055	0		450	1.145	5.44
451	1.95	7.12		451	0.075	0		451	1.775	7.12
452	3.145	7.97		452	0.185	0.015		452	2.67	7.94
453	1.635	7.085		453	0.12	0		453	1.335	7.085
454	5.115	8.345		454	0.26	0		454	4.41	8.345
455	0.145	5.605		455	0.01	0		455	0.12	5.605
456	1.15	6.53		456	0.045	0		456	1.055	6.53
457	6.62	5.955		457	0.315	0		457	5.81	5.955
458	0.565	9.13		458	0.04	0.035		458	0.49	9.055
459	0.92	6.875		459	0.055	0		459	0.79	6.875
460	0.67	10.785		460	0.045	0.085		460	0.56	10.595
461	4.065	8.525		461	0.16	0		461	3.67	8.525
462	4.145	7.48		462	0.19	0.005		462	3.615	7.47
463	3.365	9.315		463	0.165	0.045		463	2.95	9.215
464	1.205	11.28		464	0.055	0.16		464	1.075	10.93
465	2.66	5.215		465	0.125	0		465	2.325	5.215
466	1.895	14.92		466	0.085	0.265		466	1.71	14.25
467	1.185	7.03		467	0.055	0		467	1.06	7.03
468	2.83	9.73		468	0.15	0.045		468	2.475	9.635
469	6.65	5.41		469	0.3	0		469	5.88	5.41
470	0.37	6.79		470	0.035	0		470	0.3	6.79
471	0.725	6.75		471	0.015	0		471	0.685	6.75
472	3.66	7.115		472	0.235	0.005		472	3.105	7.105
473	1.295	5.885		473	0.05	0.005		473	1.18	5.875
474	3.445	13.935		474	0.125	0.2		474	3.135	13.47
475	2.2	5.19		475	0.095	0		475	1.96	5.19
476	0.55	8.165		476	0.015	0.005		476	0.515	8.155
477	1.77	8.095		477	0.075	0		477	1.585	8.095
478	4.025	9.54		478	0.19	0.08		478	3.53	9.36
479	1.495	5.375		479	0.08	0		479	1.295	5.375
480	1.81	5.61		480	0.105	0		480	1.55	5.61
481	3.39	5.85		481	0.15	0		481	3.04	5.85
482	1.985	7.56		482	0.085	0.005		482	1.79	7.55
483	1.26	5.495		483	0.1	0		483	1.01	5.495
484	2.21	10.01		484	0.125	0.015		484	1.915	9.98
485	4.635	7.67		485	0.205	0		485	4.055	7.67
486	0.995	4.25		486	0.06	0		486	0.875	4.25
487	2.975	9.915		487	0.13	0.02		487	2.66	9.87
488	0.77	10.815		488	0.02	0.06		488	0.72	10.685
489	2.505	6.74		489	0.155	0		489	2.17	6.74
490	0.9	7.16		490	0.055	0		490	0.76	7.16
491	0.69	7.72		491	0.03	0.015		491	0.625	7.68
492	1.175	6.605		492	0.065	0		492	1.02	6.605
493	5.585	6.01		493	0.29	0		493	4.79	6.01
494	4.96	8.345		494	0.23	0.005		494	4.375	8.335
495	0.5	5.435		495	0.03	0		495	0.415	5.435
496	3.54	11.35		496	0.15	0.11		496	3.19	11.08
497	5.16	7.505		497	0.255	0		497	4.47	7.505
498	1.51	6.255		498	0.11	0		498	1.225	6.255
499	1.7	11.585		499	0.095	0.13		499	1.45	11.28
500	4.345	6.17		500	0.175	0		500	3.91	6.17
MEAN	2.94197	7.60681		MEAN	0.14379	0.01917		MEAN	2.57787	7.56378
SD	2.21958	2.05247		SD	0.107861	0.0422769		SD	1.93634	1.97107

## Sheet: Fig 5Q
Figure 5Q - In Silico - Increase EPSP
	Firing Rate (spikes/s)
	BL		↓ GABA + ↑ Adapt.
Model Neuron	EPSP 30 Hz	EPSP 60 Hz	EPSP 30 Hz	EPSP 60 Hz
1	4.415	6.34	6.915	9.4
2	8.48	12.68	9.045	13.33
3	2.745	3.815	8.065	11.15
4	2.445	2.785	5.795	7.64
5	1.31	1.515	6.065	8.08
6	2.675	3.33	5.96	8.155
7	0.635	0.62	7.24	10.205
8	2.12	2.69	6.08	8.175
9	2.01	2.73	6.065	8.11
10	0.41	0.445	4.52	5.89
11	1.315	1.545	5.955	7.995
12	1.78	1.91	14.14	21.71
13	7.925	10.935	7.32	10.01
14	1.155	1.225	8.285	11.91
15	1.06	1.06	6.06	8.355
16	3.5	4.55	5.44	7
17	2.935	3.385	12.57	18.66
18	3.765	4.685	8.1	11.675
19	1.475	2.245	9.26	13.305
20	1.725	2.35	6.13	8.045
21	5.185	6.705	8.185	11.83
22	1.725	2.175	5.4	7.44
23	2.48	3.455	7.755	11.01
24	1.53	1.575	6.93	9.535
25	0.37	0.44	7.995	11.185
26	2.43	2.745	7.18	9.82
27	2.565	3.57	5.96	8.1
28	3.13	4.175	8.425	12.06
29	2.125	2.92	5.73	7.77
30	8.69	12.715	10.49	15.505
31	2.17	2.985	9.845	14.36
32	1.57	2.04	6.325	8.595
33	0.685	0.68	10.355	15.235
34	2.525	2.96	9.045	13.155
35	1.32	1.72	9.87	14.39
36	2.445	3.135	9.715	14.15
37	6.77	9.7	11.54	17.33
38	3.585	4.74	8.37	12.05
39	0.75	0.915	7.445	10.55
40	0.8	1.2	6.35	8.685
41	1.66	2.055	7.37	10.255
42	2.67	3.63	7.045	9.915
43	2.695	3.47	15.035	22.88
44	5.1	7.025	11.765	17.635
45	1.015	1.14	5.23	6.705
46	1.395	1.59	5.405	7.15
47	3.555	4.285	5.46	7.265
48	6.68	9.66	10.06	14.745
49	3.39	4.535	6.425	8.6
50	6.19	8.695	8.075	11.375
51	5.03	7.135	5.755	7.755
52	1.91	2.18	6.08	8.41
53	4.775	6.415	7.1	9.975
54	1.64	1.825	5.66	7.5
55	1.235	1.225	7.33	10.2
56	1.545	1.665	5.61	7.51
57	4.275	6.015	7.505	10.595
58	2.405	2.915	12.625	18.59
59	1.515	1.705	6.26	8.345
60	4.315	5.895	12.565	19.15
61	3.775	4.855	7.455	10.41
62	0.305	0.23	4.855	6.21
63	2.345	2.915	6.59	9.175
64	6.115	8.825	6.51	8.76
65	3.01	4.095	10.47	14.755
66	5.365	7.4	7.465	10.325
67	2.115	2.53	7.075	9.995
68	2.085	2.475	7.69	10.845
69	3.045	3.47	4.985	6.445
70	0.9	1.16	4.9	6.42
71	2.265	2.705	6.63	8.995
72	4.135	5.905	6.375	8.635
73	5.285	7.175	7.155	9.83
74	8.04	11.04	12.075	17.995
75	3.365	4.13	11.245	16.52
76	6.755	9.32	5.38	7.125
77	0.235	0.245	6.5	8.625
78	9.53	13.875	12.545	18.755
79	1.815	2.23	7.885	11.27
80	1.315	1.49	6.75	9.205
81	2.82	3.745	7.68	10.81
82	0.99	1.09	10.955	16.245
83	3	3.635	9.25	13.325
84	0.81	0.825	5.23	6.835
85	2.645	3.36	6.99	9.545
86	4.12	5.625	9.4	13.705
87	2.895	3.9	12.12	18.205
88	5.315	7.27	7.32	10.245
89	2.415	3.245	6.79	9.22
90	0.23	0.315	4.42	5.57
91	1.985	2.67	7.175	9.915
92	2.25	3.015	6.335	8.625
93	1.695	2.205	6.94	10
94	1.485	1.465	15.51	23.76
95	2.795	3.385	5.68	7.63
96	4.1	5.325	6.57	9.01
97	1.75	1.86	12.05	18.45
98	2.345	2.81	9.92	14.865
99	1.5	1.645	10.61	15.405
100	1.59	2.035	10.915	15.675
101	3.305	4.57	7.02	9.72
102	3.635	4.93	5.685	7.42
103	4.645	6.205	7.315	10.25
104	1.61	2.08	6.99	10.025
105	0.275	0.26	4.07	5.21
106	0.725	0.835	6.71	9.085
107	4.04	4.795	8.73	12.535
108	1.85	2.405	11.18	15.96
109	0.795	0.945	7.975	11.22
110	1.325	1.515	10.92	16.525
111	1.72	1.835	7.51	10.435
112	5.405	7.77	6.495	8.8
113	3.235	4.325	6.125	8.31
114	6.46	8.745	7.78	11.06
115	1.62	2.2	11.865	17.48
116	2.31	3.05	5.88	8.03
117	1.095	1.415	6.535	8.85
118	6.36	8.35	5.36	7.09
119	5.01	7.16	11.11	16.745
120	1.88	2.185	5.7	7.565
121	8.07	11.525	6.95	9.335
122	1.13	1.34	5.76	7.695
123	2.21	3.07	9.6	13.675
124	1.355	1.415	7.77	11.02
125	7.585	10.745	5.695	7.71
126	2.3	2.72	6.75	9.455
127	0.885	1.09	6.415	8.98
128	1.725	1.805	6.375	8.415
129	10.5	14.955	9.23	13.75
130	0.475	0.44	9.415	13.75
131	0.315	0.285	5.935	8.01
132	1.705	2	11.79	17.375
133	5.5	7.685	5.365	7.08
134	0.66	0.695	5.635	7.565
135	8.655	12.76	5.625	7.53
136	5.93	8.81	7.09	9.86
137	1.9	2.315	6.61	9.035
138	1.915	2.655	5.94	7.835
139	4.095	4.97	8.88	12.83
140	0.82	0.82	6.925	9.56
141	1.68	2.35	6.47	8.965
142	7.505	10.34	5.83	7.74
143	3.87	5.255	6.425	8.84
144	1.49	1.83	5.53	7.335
145	4.925	6.1	12.16	18.12
146	3.885	4.985	12.84	19.495
147	2.15	2.85	6.335	8.335
148	0.77	0.81	6.61	8.975
149	5.625	8.275	6.305	8.59
150	1.955	2.45	6	8.135
151	0.7	1.005	6.11	8.215
152	4.095	5.295	8.32	11.88
153	2.86	3.95	6.075	8.315
154	1.195	1.615	8.24	12.035
155	2.37	3.1	9.73	14.125
156	3.83	4.62	8.545	12.245
157	2.055	2.3	5.155	6.82
158	1.23	1.275	6.485	8.96
159	5.375	7.76	7.02	9.995
160	0.87	1.02	12.505	18.55
161	3.145	3.975	11.215	16.64
162	4.04	5.625	10.605	15.895
163	1.865	2.315	5.8	7.995
164	1.125	1.23	5.24	6.905
165	1.33	1.57	8.62	12.52
166	3.34	4.29	6.035	8.055
167	7.06	10.19	5.895	7.875
168	1.94	2.32	7.425	10.4
169	6.16	8.255	5.74	7.9
170	0.78	0.87	9.29	13.275
171	6.37	8.58	9.955	14.31
172	0.79	0.79	7.79	11.09
173	4.915	6.525	8.95	12.91
174	6.325	9.14	8.335	12.07
175	2.31	2.95	5.785	7.575
176	2.52	3.08	7.905	11.39
177	3.285	4.145	5.29	6.93
178	3.16	4.01	7.09	10.105
179	4.585	6.525	6.385	8.68
180	3.815	5.065	7.2	9.82
181	2.485	3.6	7.095	9.885
182	3.61	5.025	8.825	12.655
183	3.575	4.71	11.71	17.715
184	1.27	1.6	5.875	8.02
185	1.595	1.995	6.875	9.52
186	3.505	4.395	5.34	7.24
187	6.485	9.62	9.275	13.675
188	0.515	0.495	6.295	8.525
189	1.605	1.85	5.755	7.77
190	8.445	12	5.905	7.85
191	0.725	0.795	6.33	8.515
192	6.96	10.095	6.185	8.515
193	1.165	1.18	4.915	6.32
194	2.46	2.955	6.08	8.205
195	3.05	4.065	6.6	8.87
196	1.03	1.035	5.41	7.195
197	5.21	6.48	7.405	10.38
198	1.395	1.7	6.62	9.295
199	2.96	3.51	6.105	8.205
200	1.65	1.975	5.14	6.79
201	2.025	2.625	6.22	8.64
202	5.815	8.395	4.27	5.555
203	2.095	2.63	7.115	9.78
204	2.93	3.675	10.095	15.115
205	2.895	3.905	10.83	16.21
206	0.58	0.71	7.49	10.4
207	1.035	1.445	5.495	7.09
208	2.94	3.765	5.3	7.09
209	2.995	4.18	6.685	8.97
210	2.47	3.06	8.685	12.21
211	5.79	8.385	9.2	13.34
212	3.065	3.93	9.07	12.97
213	1.95	2.425	8.035	11.455
214	1.47	1.655	6.04	7.98
215	1.635	2.135	11.775	17.205
216	0.515	0.595	7.46	10.575
217	8.905	12.43	6.675	9.105
218	1.49	2.25	8.275	12.035
219	1.09	1.06	7.38	10.175
220	2.615	3.135	6.46	8.73
221	4.575	6.18	5.88	7.79
222	4.21	5.87	6.45	8.92
223	1.625	1.99	6.475	8.935
224	0.325	0.435	7.76	10.995
225	1.875	2.355	7.58	10.805
226	8.54	11.995	6.125	8.27
227	3.355	5.105	5.995	8.36
228	2.69	3.42	5.205	6.88
229	4.175	5.315	8.88	12.63
230	1.165	1.285	5.23	6.755
231	1.85	2.34	8.005	11.36
232	1.6	2.255	5.865	7.85
233	1.675	2.045	11.86	17.41
234	1.28	1.5	6.175	8.48
235	2.01	2.485	6.735	9.445
236	11.635	17.59	5.81	7.6
237	3.245	4.385	7.7	10.785
238	1.33	1.34	7.42	10.305
239	6.05	8.325	9.335	13.87
240	5.365	7.385	7.755	10.905
241	1.465	1.6	8.445	11.8
242	3.605	4.635	6.65	8.92
243	2.775	3.41	7.395	10.34
244	6.595	8.905	5.52	7.365
245	2.05	2.485	5.97	7.93
246	2.045	2.42	7.045	10.15
247	0.395	0.475	4.88	6.445
248	1.4	1.665	6.255	8.33
249	0.825	0.86	14.925	22.675
250	8.835	12.32	8.265	11.7
251	5.99	8.02	8.26	11.735
252	4.545	6.325	7	9.695
253	3.37	4.1	6.13	8.205
254	4.355	6.37	7.24	9.955
255	8.445	12.01	6.63	8.905
256	9.71	14.4	8.615	12.405
257	3.115	3.765	10.98	16.53
258	0.575	0.515	6.655	9.41
259	2.595	3.38	5.65	7.375
260	5.545	7.435	11.365	16.545
261	3.92	4.905	6.195	8.305
262	0.51	0.595	5.605	7.45
263	3.895	5.045	6.16	8.265
264	2.315	2.76	11.28	16.775
265	0.365	0.425	7.78	11.225
266	8.585	12.495	5.355	7.15
267	4.255	5.855	6.115	8.23
268	1.82	1.985	8.735	12.705
269	1.685	2.095	5.35	7.125
270	0.785	0.875	7.53	10.78
271	0.8	0.84	6.045	7.865
272	2.185	2.525	9.62	14.295
273	1.555	1.45	5.415	7.27
274	1.625	1.785	7.66	10.6
275	4.615	5.81	4.65	6.11
276	1.895	2.17	9.275	13.4
277	0.595	0.875	6.985	9.62
278	4.035	5.41	8.09	11.34
279	1.555	2.145	7.775	10.99
280	1.185	1.355	6.095	8.04
281	2.015	2.33	8.105	11.48
282	4.375	5.17	7.145	9.99
283	2.6	3.415	9.74	14.04
284	0.77	0.965	5.885	7.98
285	0.475	0.425	5.96	8.1
286	1.64	2.255	6.355	8.79
287	1.09	1.11	8.27	11.475
288	1.06	1.02	5.18	6.73
289	0.44	0.52	6.735	9.44
290	1.92	2.225	9.41	13.59
291	0.345	0.355	6.435	9.23
292	8.21	11.81	9.56	13.885
293	2.495	2.9	8.615	12.305
294	3.97	5.545	10.915	16.175
295	2.94	3.555	7.475	10.36
296	2.65	3.23	5.51	7.3
297	2.265	2.675	5.91	7.935
298	0.97	0.94	6.25	8.365
299	0.64	0.875	5.41	7.445
300	6.945	10.39	7.315	10.23
301	3.86	5.505	6.34	8.685
302	3.22	4.19	9.69	14.35
303	1.285	1.48	8.21	11.49
304	4.69	7.025	6.9	9.595
305	1.75	2.205	12.18	17.995
306	5.485	6.795	8.23	11.705
307	6.25	8.95	6.53	8.89
308	4.65	6.715	8.675	12.47
309	1.94	2.355	5.92	8.04
310	0.93	0.925	8.085	11.745
311	2.235	2.31	10.175	14.715
312	2.92	3.735	6.965	9.65
313	1.86	2.265	6.79	9.375
314	3.985	5.63	6.98	9.48
315	4.21	5.865	8.87	12.885
316	2.395	2.79	8.61	12.61
317	4.925	7.115	6.785	9.315
318	6.16	8.1	6.46	8.905
319	1.215	1.515	8.3	11.85
320	4.33	5.12	6.15	8.275
321	2.945	3.625	6.365	8.425
322	10.695	15.175	5.835	7.625
323	1.83	2.52	6.52	8.83
324	2.64	3.325	9.545	14.13
325	2.74	3.805	5.585	7.425
326	0.94	1.145	5.96	7.86
327	1.575	1.965	6.62	9.15
328	4.9	6.91	5.94	7.945
329	2.18	2.865	8.33	11.955
330	3.04	4.005	8.62	12.385
331	3.61	4.765	8.225	11.74
332	0.57	0.61	9.565	14.13
333	4.9	6.87	8.03	11.47
334	2.53	3.39	9.475	14.005
335	1.92	2.465	11.665	17.145
336	2.045	2.42	6.005	8.185
337	2.915	3.715	5.61	7.65
338	3.39	4.165	6.56	8.835
339	0.78	0.955	5.07	6.63
340	1.615	1.62	6.355	8.51
341	1.545	2.285	6.165	8.39
342	7.7	11.265	7.27	10.225
343	1.485	2.01	8.605	12.43
344	3.84	4.835	5.695	7.76
345	0.765	1.04	7.74	10.845
346	8.52	11.5	10.275	15.265
347	1.69	1.985	5.835	7.93
348	0.49	0.57	7.72	11.115
349	2.565	2.97	5.185	6.91
350	0.855	0.93	4.765	6.255
351	0.65	0.695	7.285	9.9
352	1.67	2.03	7.405	10.545
353	4.1	5.565	6.395	8.805
354	1.475	1.83	9.59	14.01
355	1.8	2.195	5.785	7.85
356	2.67	3.44	6.845	9.235
357	0.865	1.08	5.515	7.22
358	0.965	1.255	5.605	7.43
359	1.78	2.045	5.565	7.37
360	1.715	2.33	5.055	6.62
361	5.98	8.37	9.05	13.18
362	2.44	3.235	6.035	8.29
363	2.295	2.995	5.63	7.59
364	3.83	5.41	6.18	8.295
365	1.96	2.445	5.69	7.61
366	2.795	3.965	6.285	8.555
367	10.515	14.87	11.58	17.53
368	0.87	0.92	5.755	7.65
369	1.785	2.025	5.56	7.41
370	1.09	1.255	10.515	15.495
371	1.25	1.75	10.3	15.3
372	1.845	2.465	7.37	10.42
373	1.595	2.02	5.97	7.955
374	1.325	1.62	6.09	8.25
375	3.745	4.675	13.72	20.785
376	1.725	2.29	10.69	15.9
377	1.605	2.045	9.43	13.77
378	0.695	0.845	8.325	12.19
379	1.45	1.74	10.155	15.42
380	1.745	2.11	9.815	14.145
381	4.24	5.32	6.72	9.355
382	2.95	3.575	6.96	9.48
383	1.06	1.305	10.75	15.825
384	5.73	7.31	11.255	16.49
385	1.58	2.04	5.805	7.745
386	0.755	0.815	10.42	15.56
387	2.57	3.205	10.105	14.925
388	2.315	2.695	7.39	10.275
389	8.61	12.24	7.09	9.695
390	2.4	2.48	6.595	9.105
391	5.17	6.72	5.955	8.135
392	5.755	7.825	10.805	16.395
393	0.56	0.715	10.215	15.075
394	5.335	7.1	5.605	7.475
395	1.44	1.765	7.775	11.15
396	1.645	2.005	4.95	6.375
397	1.9	2.535	6.105	8.225
398	3.175	4.525	9.59	14.08
399	1.165	1.31	6.17	8.3
400	4.115	5.64	9.415	13.63
401	6.265	8.84	6.795	9.495
402	0.97	1.17	5.78	7.535
403	1.165	1.395	5.69	7.54
404	2.55	3.415	6.245	8.445
405	3.8	4.675	5.645	7.46
406	4.035	5.86	6.24	8.475
407	3.72	4.895	8.495	12.37
408	5.05	6.7	8.005	11.385
409	5.4	7.08	5.585	7.47
410	3.745	4.78	6.895	9.43
411	1.56	1.925	7.335	10.07
412	1.685	1.895	6.45	8.945
413	2.145	2.465	9.35	13.34
414	0.89	1.035	6.355	8.845
415	0.7	0.625	9.54	14.015
416	2.61	3.395	7.345	10.355
417	1.24	1.16	6.87	9.565
418	5.245	6.95	10.175	14.95
419	2.18	2.065	6.29	8.495
420	0.995	1.385	5.5	7.26
421	5.72	8.62	7.72	10.94
422	0.835	1.005	5.92	7.95
423	1.935	2.425	8.645	12.35
424	0.675	0.685	8.425	12.235
425	1.425	1.945	7.675	10.955
426	1.425	1.695	11.225	16.76
427	3.115	3.57	12.73	19.08
428	4.67	6.5	5.56	7.295
429	7.075	9.725	7.025	9.8
430	3.185	4	9.175	13.015
431	10.905	16.105	8.81	12.745
432	0.97	1.155	7.67	10.645
433	13.55	20.705	7.165	10.06
434	0.615	0.575	8.365	11.99
435	3.64	4.515	7.415	10.595
436	5.06	7.08	9.645	13.97
437	0.575	0.675	7.765	10.91
438	7.445	11.22	7.475	10.525
439	0.685	0.81	9.615	14.035
440	3.23	4.095	6.505	8.825
441	1.145	1.29	6.42	8.98
442	3.115	4.12	12.09	17.96
443	11.035	16.16	12.595	18.885
444	3.06	4.355	7.705	10.665
445	4.2	4.97	5.315	6.885
446	2.1	2.9	7.055	9.755
447	2.705	3.745	5.015	6.64
448	2.375	3.25	5.48	7.25
449	1.625	2.66	5.72	7.575
450	1.29	1.53	5.67	7.45
451	1.95	2.365	5.99	8.13
452	3.145	4.05	6.475	8.68
453	1.635	1.88	8.57	12.51
454	5.115	7.09	8.495	12.185
455	0.145	0.17	8.265	11.58
456	1.15	1.35	8.225	11.575
457	6.62	9.16	12.07	17.94
458	0.565	0.47	9.355	13.575
459	0.92	1.13	5.075	6.61
460	0.67	0.85	7.655	10.885
461	4.065	5.55	8.83	12.895
462	4.145	5.27	9.045	13.015
463	3.365	4.23	8.83	12.575
464	1.205	1.4	11.875	17.465
465	2.66	3.28	7.125	9.85
466	1.895	2.195	7.915	10.965
467	1.185	1.615	6.33	8.54
468	2.83	3.625	4.88	6.465
469	6.65	8.995	5.855	7.885
470	0.37	0.35	4.49	5.81
471	0.725	0.91	5.045	6.765
472	3.66	4.415	5.73	7.595
473	1.295	1.665	10.94	16.335
474	3.445	4.165	6.495	8.795
475	2.2	2.7	5.3	6.965
476	0.55	0.75	7.93	11.23
477	1.77	2.145	6.115	8.435
478	4.025	5.195	5.04	6.595
479	1.495	1.955	6.76	9.165
480	1.81	2.105	6.37	8.715
481	3.39	4.345	5.505	7.34
482	1.985	2.38	10.81	15.98
483	1.26	1.315	6.79	9.495
484	2.21	2.33	5.79	7.78
485	4.635	5.92	5.705	7.49
486	0.995	1.17	5.33	7.19
487	2.975	4.125	6.535	9.12
488	0.77	0.81	5.32	6.805
489	2.505	3.215	9.6	14.125
490	0.9	0.99	14.155	21.805
491	0.69	0.79	6.12	8.265
492	1.175	1.59	6.18	8.435
493	5.585	8.265	6.715	9.29
494	4.96	7.165	7.605	10.495
495	0.5	0.405	6.13	8.515
496	3.54	4.685	5.945	7.865
497	5.16	6.795	7.57	10.565
498	1.51	1.665	10.365	14.93
499	1.7	2.24	8.175	11.81
500	4.345	5.875	12.76	19.3
MEAN	2.94197	3.89473	7.54827	10.6297
SD	2.21958	3.25237	2.0675	3.38706
