# Supplementary material for: State-dependent activity dynamics of hypothalamic stress effector neurons
Source: eLife journal article supplement (doi:10.7554/elife.76832), 2022-06-30
Supplement: supp [file elife_poa_e76832_Figure_1_source_data_1.xlsx]

## Sheet: Fig1D 1F
Figure 1D - Light Response				Figure 1F - Light Response - Firing Rate Time Course (spikes/s)
	Event Probabiliy				5 ms Light Pulse
Unit	BL	Light		Time (ms)	Unit2	Unit3	Unit6	Unit8	Unit12	Unit13	Unit16	Unit18	Unit20	Unit24	Unit25	Unit27	Unit29	Unit30	Unit32	Unit33	Unit35	Unit36	Mean	SD
Unit1	0.08	0		-20	4	0	4	12	8	0	4	0	0	8	0	0	4	4	0	9.09091	8	8	4.061	3.955
Unit2	0.16	0.56		-10	8	4	0	8	8	4	8	0	0	0	0	8	4	0	0	9.09091	0	4	3.616	3.688
Unit3	0.08	0.56		0	8	4	12	4	12	0	0	0	4	4	0	12	4	0	0	6.06061	0	0	3.892	4.472
Unit4	0.04	0		10	56	52	52	64	112	128	144	92	20	32	124	112	84	16	32	78.7879	20	32	69.49	41.42
Unit5	0.08	0.04		20	8	12	12	20	44	88	24	12	20	28	64	68	64	44	0	9.09091	72	0	32.73	27.73
Unit6	0.12	0.52		30	12	4	0	8	20	28	4	8	36	0	16	32	8	8	0	0	36	0	12.22	12.83
Unit7	0.08	0		40	20	0	0	0	4	0	4	4	8	4	4	4	12	8	0	0	0	0	4	5.314
Unit8	0.12	0.6		50	4	0	4	0	16	4	0	4	12	4	0	8	0	4	0	0	0	0	3.333	4.602
Unit9	0	0		60	4	0	0	0	8	0	4	4	4	0	0	16	4	0	0	0	0	0	2.444	4.148
Unit10	0.08	0.04		70	0	0	0	12	4	12	8	0	4	0	4	16	0	16	0	3.0303	0	4	4.613	5.71
Unit11	0.04	0		80	0	0	0	4	4	0	0	0	16	0	0	4	0	0	0	3.0303	0	0	1.724	3.908
Unit12	0.12	0.96		90	0	0	4	4	8	0	12	8	4	4	0	8	0	4	0	6.06061	0	0	3.448	3.748
Unit13	0.04	0.96		100	0	0	4	4	16	4	0	4	16	0	4	12	0	8	0	0	0	4	4.222	5.397
Unit14	0	0.08			50 ms Light Pulse
Unit15	0	0.04		Time (ms)	Unit2	Unit3	Unit6	Unit8	Unit12	Unit13	Unit16	Unit18	Unit20	Unit24	Unit25	Unit27	Unit29	Unit30	Unit32	Unit33	Unit35	Unit36	Mean	SD
Unit16	0.08	0.96		-20	4	8	0	4	0	8	8	4	0	8	0	0	0	4	0	12	0	0	3.333	3.941
Unit17	0.04	0		-10	4	0	0	8	8	4	8	0	4	0	4	0	0	8	0	12	0	0	3.333	3.941
Unit18	0	0.76		0	0	0	0	4	4	0	4	0	0	12	4	12	4	8	0	8	8	4	4	4.116
Unit19	0.04	0.04		10	40	28	64	172	124	48	184	88	44	56	224	172	84	72	44	132	8	44	90.44	62.56
Unit20	0.04	0.36		20	16	20	36	160	168	160	116	120	152	84	36	148	76	100	32	56	80	12	87.33	55.19
Unit21	0.04	0		30	16	12	32	120	140	108	28	148	112	44	0	88	36	96	40	56	12	44	62.89	47.36
Unit22	0.04	0		40	4	4	28	100	100	84	8	100	76	72	0	48	16	96	32	28	4	16	45.33	38.93
Unit23	0	0		50	8	0	20	76	76	32	12	96	52	40	0	20	4	60	32	32	4	12	32	29.2
Unit24	0.04	0.56		60	0	0	0	8	24	100	0	44	12	8	0	4	0	0	12	12	0	4	12.67	24.51
Unit25	0	0.92		70	0	0	0	0	12	4	0	0	16	0	0	0	0	4	0	0	0	0	2	4.602
Unit26	0	0.08		80	0	0	0	0	4	8	0	0	16	0	0	0	0	4	0	0	0	0	1.778	4.166
Unit27	0.2	0.8		90	0	0	0	0	0	0	12	0	8	0	0	0	0	0	0	4	0	0	1.333	3.361
Unit28	0	0.04		100	0	0	0	0	0	0	8	0	8	0	0	0	0	0	0	12	0	0	1.556	3.666
Unit29	0.08	0.8
Unit30	0	0.6
Unit31	0.04	0
Unit32	0	0.32
Unit33	0.152	0.727
Unit34	0	0
Unit35	0	0.64
Unit36	0.04	0.32
