# Supplementary material for: State-dependent activity dynamics of hypothalamic stress effector neurons
Source: eLife journal article supplement (doi:10.7554/elife.76832), 2022-06-30
Supplement: supp [file elife_poa_e76832_Figure_2_source_data_1.xlsx]

## Sheet: Fig 2C 2D
Figure 2C - Burst Rate			Figure 2D - Spikes per Burst Distribution
	Firing Rate (bursts/s)			Fraction Bursts
Unit2	0.138333			2	3	4	5	6
Unit3	0.188333		Unit2	0.289157	0.361446	0.240964	0.108434	0
Unit6	0.225		Unit3	0.017699	0.238938	0.389381	0.318584	0.035398
Unit8	0.445		Unit6	0.185185	0.377778	0.296296	0.133333	0.007407
Unit12	0.0433333		Unit8	0.554307	0.382022	0.059925	0.003745	0
Unit13	0.265		Unit13	0.660377	0.320755	0.018868	0	0
Unit16	0.0433333		Unit20	0.130841	0.224299	0.373832	0.214953	0.056075
Unit18	0		Unit27	0.104938	0.376543	0.302469	0.166667	0.049383
Unit20	0.18		Unit33	0.514512	0.46438	0.015831	0.005277	0
Unit24	0.0166667		Unit35	0.369458	0.53202	0.093596	0.004926	0
Unit25	0.0116667		Unit36	0.637168	0.331858	0.030973	0	0
Unit27	0.271667		Mean	0.3464	0.361	0.1822	0.09559	0.01483
Unit29	0.0933333		SD	0.235	0.09247	0.153	0.1124	0.02283
Unit30	0
Unit32	0.00166667
Unit33	0.631667
Unit35	0.338333
Unit36	0.376667

## Sheet: Fig 2E
Figure 2E - Interburst Interval (IBI) Distribution
	Fraction IBI
IBI (ms)	Unit2	Unit3	Unit6	Unit8	Unit13	Unit20	Unit27	Unit33	Unit35	Unit36	Mean	SD
100	0	0	0	0	0.0189873	0	0	0.0185185	0	0	0.00375059	0.0079077
200	0	0	0.00746269	0	0.0443038	0	0.0246914	0.021164	0	0	0.00976219	0.015359
300	0.0243902	0.00892857	0	0.0225564	0.0189873	0	0.0740741	0.0661376	0	0.0311111	0.0246185	0.0264832
400	0.0121951	0	0.0522388	0.0488722	0.00632911	0.00934579	0.0246914	0.0634921	0.0049505	0.0488889	0.0271004	0.0238158
500	0.0487805	0	0.0447761	0.0488722	0.0189873	0.0373832	0.0308642	0.0396825	0.00990099	0.0444444	0.0323691	0.0171722
600	0.0853659	0.0267857	0.0597015	0.0338346	0.0506329	0.046729	0.0185185	0.0449735	0.0148515	0.0355556	0.0416949	0.0208882
700	0.0853659	0.0267857	0.0223881	0.0413534	0.0189873	0.00934579	0.0432099	0.0343915	0.00990099	0.0355556	0.0327284	0.0220217
800	0.0121951	0.0178571	0.0373134	0.0488722	0.056962	0.00934579	0.0432099	0.0449735	0.0693069	0.0488889	0.0388925	0.0198254
900	0.0121951	0.0178571	0.0447761	0.0488722	0.0189873	0.00934579	0.0308642	0.0291005	0.0346535	0.0355556	0.0282207	0.0133718
1000	0.0487805	0.0357143	0.0522388	0.0526316	0.00632911	0.0373832	0.0123457	0.026455	0.029703	0.0133333	0.0314914	0.0169535
1100	0.0365854	0.0892857	0.0597015	0.037594	0.0316456	0.00934579	0.0308642	0.0291005	0.029703	0.04	0.0393826	0.02147
1200	0.0121951	0.0267857	0.0447761	0.037594	0.0189873	0.0186916	0.037037	0.042328	0.0148515	0.0355556	0.0288802	0.0120269
1300	0.0121951	0.0446429	0.0373134	0.0300752	0.0443038	0.0280374	0.0493827	0.031746	0.019802	0.0444444	0.0341943	0.0120592
1400	0	0.0267857	0.00746269	0.0601504	0.0379747	0.0186916	0.0308642	0.0343915	0.0247525	0.04	0.0281073	0.0170962
1500	0.0121951	0.0178571	0.0373134	0.037594	0.0189873	0.0280374	0.0123457	0.0555556	0.0346535	0.04	0.0294539	0.0140799
1600	0.0365854	0.0357143	0.00746269	0.037594	0.0253165	0.0280374	0.0555556	0.037037	0.0445545	0.00444444	0.0312302	0.0157049
1700	0.0121951	0.0357143	0.0298507	0.0225564	0.0379747	0	0.0123457	0.026455	0.0445545	0.0177778	0.0239424	0.0136919
1800	0.0121951	0.0535714	0.00746269	0.0413534	0.0443038	0	0.0185185	0.026455	0.0445545	0.0177778	0.0266192	0.0182737
1900	0.0121951	0.00892857	0.00746269	0.0263158	0.0253165	0.0373832	0.0123457	0.042328	0.0643564	0.0355556	0.0272188	0.0181246
2000	0.0243902	0.0178571	0.0149254	0.018797	0.00632911	0.0186916	0.0246914	0.031746	0.0346535	0.0133333	0.0205415	0.00853675
2100	0	0.00892857	0.00746269	0.0225564	0.0189873	0.00934579	0.0123457	0.021164	0.019802	0.0177778	0.013837	0.00734795
2200	0.0243902	0.0357143	0.00746269	0.018797	0	0.00934579	0.0246914	0.026455	0.00990099	0.0133333	0.0170091	0.0108475
2300	0	0.0178571	0	0.018797	0.0316456	0.00934579	0.0185185	0.021164	0.019802	0.0222222	0.0159352	0.00999152
2400	0	0	0	0.0150376	0.0189873	0.0186916	0.00617284	0.0132275	0.0247525	0.00888889	0.0105758	0.00895862
2500	0.0121951	0.0267857	0.0149254	0.0037594	0	0.0280374	0.00617284	0.010582	0.019802	0.0222222	0.0144482	0.00964775
2600	0	0.00892857	0	0.0112782	0.0379747	0	0.0123457	0.0132275	0.0148515	0.0266667	0.0125273	0.0121962
2700	0	0.00892857	0.0298507	0.0112782	0.0126582	0.0186916	0.0123457	0.00529101	0.019802	0.0133333	0.0132179	0.00823785
2800	0.0243902	0.00892857	0.0223881	0.0112782	0.0189873	0.0186916	0.00617284	0.010582	0.029703	0.00888889	0.0160011	0.00791581
2900	0.0121951	0	0	0.018797	0.00632911	0.00934579	0.0246914	0.00793651	0.019802	0.00888889	0.0107986	0.0082134
3000	0.0121951	0	0.0223881	0.0225564	0.0189873	0.0280374	0.00617284	0.010582	0.00990099	0	0.013082	0.00967283
3100	0.0121951	0.0178571	0	0	0	0	0.0123457	0.0132275	0.0049505	0.0133333	0.00739093	0.00707899
3200	0	0.00892857	0	0.0075188	0.00632911	0	0.0308642	0	0.0049505	0.00888889	0.00674801	0.009292
3300	0	0.00892857	0	0	0.00632911	0.0373832	0.0123457	0.00793651	0.00990099	0.00444444	0.00872685	0.0109994
3400	0.0121951	0	0.0223881	0.0037594	0.00632911	0.0373832	0.00617284	0.00529101	0.00990099	0.0266667	0.0130086	0.0119473
3500	0	0.00892857	0.00746269	0	0.00632911	0.00934579	0.0123457	0.015873	0.00990099	0	0.00701859	0.00550359
3600	0.0243902	0	0	0.0037594	0	0.00934579	0.0123457	0.00529101	0.00990099	0.00888889	0.0073922	0.00750827
3700	0	0.00892857	0	0.0075188	0	0.0186916	0	0.0026455	0.00990099	0.00444444	0.00521299	0.0061342
3800	0.0243902	0	0.0149254	0.0150376	0.0189873	0.0186916	0	0	0.0148515	0.00888889	0.0115773	0.00890023
3900	0	0	0.00746269	0.0075188	0.0126582	0.0186916	0	0.00793651	0.00990099	0.0133333	0.00775021	0.00632427
4000	0.0243902	0	0.0149254	0.0075188	0.0126582	0.00934579	0.0123457	0.00529101	0.0148515	0.00444444	0.0105771	0.00686162
4100	0	0.0178571	0	0.0112782	0	0.0186916	0.00617284	0.0026455	0.0148515	0.00444444	0.00759412	0.00748455
4200	0.0121951	0	0.00746269	0	0.0126582	0.00934579	0	0.0026455	0.0148515	0	0.00591588	0.00605141
4300	0	0.00892857	0	0	0.00632911	0.00934579	0.00617284	0.00529101	0.00990099	0.00444444	0.00504128	0.00389954
4400	0	0.00892857	0.00746269	0.0037594	0	0.00934579	0	0	0	0	0.00294965	0.0040809
4500	0.0121951	0	0	0	0	0	0.0123457	0	0.00990099	0	0.00344418	0.00558314
4600	0	0	0	0.0075188	0	0.00934579	0.00617284	0.00529101	0.0247525	0	0.00530809	0.00775243
4700	0	0.0178571	0.00746269	0.0037594	0	0	0	0	0.0049505	0.0133333	0.00473631	0.0063828
4800	0	0.00892857	0	0.0075188	0.00632911	0	0.0123457	0.0026455	0.00990099	0	0.00476687	0.00479031
4900	0	0	0	0.0075188	0.00632911	0.00934579	0	0.0026455	0.00990099	0.00888889	0.00446291	0.00433076
5000	0	0	0	0.0037594	0.00632911	0	0.00617284	0	0.0049505	0.0177778	0.00389896	0.00558602
5100	0	0.00892857	0.00746269	0	0.00632911	0	0.00617284	0.0026455	0	0.00888889	0.00404276	0.00388937
5200	0	0	0	0.0075188	0.00632911	0	0	0	0	0.00444444	0.00182924	0.00303465
5300	0	0	0	0.0037594	0	0	0	0	0	0.00444444	0.000820384	0.00173704
5400	0.0121951	0.0178571	0.00746269	0	0	0	0	0.0026455	0	0.00888889	0.00490493	0.00640067
5500	0	0	0	0	0	0	0	0	0	0.00444444	0.000444444	0.00140546
5600	0	0.00892857	0.0149254	0	0	0	0	0	0	0.00444444	0.00282984	0.00518716
5700	0	0.00892857	0.00746269	0	0.00632911	0.00934579	0	0.0026455	0.00990099	0.00888889	0.00535015	0.00422442
5800	0	0	0.00746269	0	0.00632911	0.00934579	0	0.0026455	0	0	0.00257831	0.00370608
5900	0.0121951	0	0	0	0	0	0	0	0	0	0.00121951	0.00385644
6000	0	0	0.0149254	0	0.0126582	0.0186916	0.00617284	0	0.0049505	0	0.00573985	0.00719201
6100	0	0.00892857	0.00746269	0	0	0	0	0	0	0	0.00163913	0.00347281
6200	0	0.00892857	0.00746269	0	0	0	0	0	0.00990099	0	0.00262922	0.00427281
6300	0	0	0	0	0.0126582	0	0	0	0.0049505	0	0.00176087	0.00413295
6400	0	0	0.00746269	0.0075188	0	0	0.00617284	0.00529101	0.0049505	0	0.00313958	0.0034036
6500	0	0	0	0.0037594	0	0	0.0123457	0	0	0.00888889	0.0024994	0.00451038
6600	0	0	0	0	0.00632911	0	0	0.0026455	0.00990099	0	0.00188756	0.00348739
6700	0	0	0	0	0.0126582	0	0	0.0026455	0	0	0.00153037	0.00399735
6800	0.0121951	0	0.00746269	0	0	0	0	0	0.0049505	0	0.00246083	0.00432516
6900	0	0	0	0.0037594	0	0	0	0	0.00990099	0.00444444	0.00181048	0.00331892
7000	0	0.0178571	0	0	0	0	0	0	0	0.00888889	0.0026746	0.00602176
7100	0	0.00892857	0	0	0	0.00934579	0.00617284	0	0	0	0.00244472	0.00401941
7200	0	0	0.00746269	0	0	0	0	0	0	0.0133333	0.0020796	0.00459737
7300	0	0	0.00746269	0	0	0	0	0	0	0	0.000746269	0.00235991
7400	0	0	0.00746269	0	0.00632911	0	0.00617284	0	0	0	0.00199646	0.00323169
7500	0	0	0	0	0	0	0	0	0	0	0	0
7600	0.0121951	0	0	0	0	0	0	0	0	0	0.00121951	0.00385644
7700	0	0	0	0	0	0	0	0	0	0.00444444	0.000444444	0.00140546
7800	0.0121951	0	0	0.0075188	0	0.0186916	0	0	0	0	0.00384055	0.00672582
7900	0	0	0.0149254	0	0	0.00934579	0	0	0	0	0.00242712	0.00528311
8000	0	0	0	0	0	0.00934579	0	0	0	0	0.000934579	0.0029554
8100	0	0	0	0	0	0	0	0	0	0.00444444	0.000444444	0.00140546
8200	0	0	0.00746269	0	0	0	0.00617284	0	0	0.00888889	0.00225244	0.00368289
8300	0.0121951	0	0	0	0	0.00934579	0	0	0	0	0.00215409	0.00459062
8400	0	0	0	0.0037594	0	0	0.0123457	0	0	0	0.00161051	0.00395266
8500	0	0.00892857	0.00746269	0	0	0	0	0	0	0	0.00163913	0.00347281
8600	0.0121951	0.00892857	0	0	0.00632911	0	0.00617284	0	0	0	0.00336256	0.00463721
8700	0	0.00892857	0	0	0	0	0.00617284	0	0	0	0.00151014	0.00324924
8800	0	0	0	0	0.00632911	0	0	0.0026455	0	0	0.000897462	0.00208172
8900	0.0121951	0	0	0	0	0.00934579	0	0	0	0.00444444	0.00259854	0.00457401
9000	0	0	0	0	0	0.00934579	0	0.0026455	0	0	0.00119913	0.00298074
9100	0.0121951	0	0	0	0	0	0	0	0	0	0.00121951	0.00385644
9200	0	0	0	0	0	0	0	0	0.0049505	0	0.00049505	0.00156548
9300	0	0	0	0	0	0.0186916	0	0	0	0	0.00186916	0.0059108
9400	0	0.00892857	0	0	0	0	0	0	0	0.00444444	0.0013373	0.00301088
9500	0	0	0.00746269	0	0	0	0.00617284	0	0	0	0.00136355	0.00289065
9600	0	0.00892857	0	0	0	0	0	0	0	0.00444444	0.0013373	0.00301088
9700	0	0	0	0	0.00632911	0.00934579	0	0	0	0	0.00156749	0.00338019
9800	0	0	0	0	0.00632911	0	0	0	0.0049505	0	0.00112796	0.00240005
9900	0	0	0	0	0	0	0	0	0	0	0	0
10000	0.0121951	0	0	0	0	0	0	0	0	0.00444444	0.00166396	0.00395512
10100	0	0.00892857	0	0	0	0	0.00617284	0	0	0	0.00151014	0.00324924
10200	0	0	0	0	0	0	0	0	0	0.00444444	0.000444444	0.00140546
10300	0	0.00892857	0	0	0	0	0	0	0	0	0.000892857	0.00282346
10400	0	0	0	0	0	0	0	0	0	0	0	0
10500	0	0	0	0	0	0	0	0	0	0	0	0
10600	0	0	0	0	0	0	0	0	0	0.00444444	0.000444444	0.00140546
10700	0	0	0	0	0	0	0	0	0	0	0	0
10800	0	0.00892857	0	0	0	0	0	0	0	0	0.000892857	0.00282346
10900	0	0	0	0	0	0	0	0	0	0	0	0
11000	0	0	0.00746269	0	0	0	0	0	0	0	0.000746269	0.00235991
11100	0	0	0	0	0.00632911	0	0.00617284	0	0	0	0.0012502	0.0026359
11200	0	0	0	0	0	0.00934579	0	0	0	0	0.000934579	0.0029554
11300	0	0.00892857	0	0	0.00632911	0	0	0	0	0	0.00152577	0.00327444
11400	0	0	0	0	0	0	0	0	0	0	0	0
11500	0	0	0	0	0.00632911	0	0	0	0	0	0.000632911	0.00200144
11600	0	0	0	0	0	0	0	0	0	0	0	0
11700	0	0	0.00746269	0	0	0	0.00617284	0	0	0	0.00136355	0.00289065
11800	0	0	0	0	0	0	0	0	0	0	0	0
11900	0	0	0	0	0	0.0186916	0.00617284	0	0	0	0.00248644	0.00601531
12000	0	0	0	0	0	0	0	0	0	0	0	0
12100	0	0.0178571	0	0	0	0	0	0	0	0	0.00178571	0.00564692
12200	0	0	0.00746269	0	0	0	0	0	0	0	0.000746269	0.00235991
12300	0	0.00892857	0.00746269	0	0	0	0	0	0	0	0.00163913	0.00347281
12400	0	0.00892857	0	0	0	0	0	0	0	0	0.000892857	0.00282346
12500	0	0	0	0	0	0	0	0	0	0	0	0
12600	0	0	0	0	0	0	0	0	0	0	0	0
12700	0	0	0	0	0	0	0.00617284	0	0	0	0.000617284	0.00195202
12800	0	0	0	0	0	0	0	0	0	0	0	0
12900	0	0	0	0	0	0	0	0	0	0	0	0
13000	0	0	0	0	0	0	0	0	0	0	0	0
13100	0.0121951	0	0	0	0.00632911	0	0	0	0	0	0.00185242	0.00414278
13200	0	0	0	0	0	0	0	0	0	0	0	0
13300	0	0	0	0	0	0	0	0	0	0	0	0
13400	0	0	0	0	0	0	0	0	0	0	0	0
13500	0	0	0	0	0	0	0	0.0026455	0	0	0.00026455	0.000836581
13600	0	0	0	0	0	0	0	0	0	0	0	0
13700	0.0121951	0	0	0	0	0	0	0	0	0	0.00121951	0.00385644
13800	0.0121951	0	0	0	0	0	0	0	0	0	0.00121951	0.00385644
13900	0.0121951	0	0	0.0075188	0	0	0	0	0	0	0.00197139	0.00429973
14000	0	0	0	0	0	0	0	0	0	0	0	0
14100	0	0.00892857	0	0	0	0	0	0	0	0	0.000892857	0.00282346
14200	0.0121951	0	0	0	0	0	0	0	0	0	0.00121951	0.00385644
14300	0	0	0	0	0	0	0	0	0	0	0	0
14400	0	0	0	0	0	0	0	0	0	0	0	0
14500	0	0	0	0	0	0	0	0	0	0	0	0
14600	0	0	0	0	0.00632911	0	0	0	0	0	0.000632911	0.00200144
14700	0	0	0	0	0	0	0	0	0	0	0	0
14800	0.0121951	0	0	0	0	0	0	0	0	0	0.00121951	0.00385644
14900	0	0	0	0	0	0.0186916	0	0	0	0	0.00186916	0.0059108
15000	0	0	0	0	0	0	0	0	0	0	0	0
15100	0	0	0	0	0	0	0	0	0	0	0	0
15200	0	0.00892857	0	0	0	0	0	0	0	0	0.000892857	0.00282346
15300	0	0.00892857	0	0	0	0	0	0	0	0	0.000892857	0.00282346
15400	0	0	0	0	0	0	0	0	0	0	0	0
15500	0	0	0	0	0	0	0	0	0	0	0	0
15600	0	0	0	0	0	0.00934579	0	0	0	0	0.000934579	0.0029554
15700	0	0	0	0	0	0	0	0	0	0	0	0
15800	0	0	0	0	0	0	0	0	0	0	0	0
15900	0	0	0	0	0	0	0	0	0	0	0	0
16000	0	0	0	0	0	0.00934579	0	0	0	0	0.000934579	0.0029554
16100	0	0	0	0	0	0	0	0	0	0	0	0
16200	0	0	0	0	0	0	0	0	0	0	0	0
16300	0	0	0	0	0	0	0	0	0	0	0	0
16400	0	0	0	0	0	0	0	0	0	0	0	0
16500	0	0	0	0	0	0	0	0	0	0	0	0
16600	0	0	0	0	0	0	0	0	0	0	0	0
16700	0	0	0	0	0	0	0	0	0	0	0	0
16800	0	0	0	0	0	0	0	0	0	0	0	0
16900	0	0	0	0	0	0	0	0	0	0	0	0
17000	0	0	0.00746269	0	0	0	0	0	0	0	0.000746269	0.00235991
17100	0	0	0	0.0037594	0	0	0	0	0	0	0.00037594	0.00118883
17200	0	0	0	0	0	0.00934579	0	0	0	0	0.000934579	0.0029554
17300	0	0	0	0	0	0	0	0	0	0	0	0
17400	0	0	0	0	0	0	0	0	0	0	0	0
17500	0	0	0	0	0	0	0	0	0	0	0	0
17600	0	0	0	0	0	0	0	0	0	0	0	0
17700	0	0	0	0	0	0	0	0	0	0	0	0
17800	0	0	0	0	0	0	0	0	0.0049505	0	0.00049505	0.00156548
17900	0	0	0	0	0	0	0	0	0	0	0	0
18000	0	0	0	0	0	0	0	0	0	0	0	0
18100	0	0	0	0	0	0	0	0	0	0	0	0
18200	0	0	0	0	0	0	0	0	0	0	0	0
18300	0	0	0	0	0	0.00934579	0	0	0	0	0.000934579	0.0029554
18400	0	0	0	0	0	0	0	0	0	0	0	0
18500	0	0	0	0	0.00632911	0	0	0	0	0	0.000632911	0.00200144
18600	0	0	0	0	0	0	0	0	0	0	0	0
18700	0	0	0	0	0	0	0	0	0	0	0	0
18800	0	0	0	0	0	0	0	0	0	0	0	0
18900	0	0	0	0	0	0	0	0	0	0	0	0
19000	0	0	0	0	0	0	0	0	0	0	0	0
19100	0	0	0	0	0	0	0	0	0	0	0	0
19200	0	0	0	0	0	0	0	0	0	0	0	0
19300	0	0	0	0	0	0.00934579	0	0	0	0	0.000934579	0.0029554
19400	0	0	0	0	0	0	0	0	0	0	0	0
19500	0	0	0	0	0	0	0	0	0	0	0	0
19600	0	0	0	0	0	0	0	0	0	0	0	0
19700	0	0	0	0	0	0	0	0	0	0	0	0
19800	0	0	0	0	0	0	0	0	0	0	0	0
19900	0.0121951	0	0	0	0	0	0	0	0	0	0.00121951	0.00385644
20000	0	0	0	0	0	0	0	0	0	0	0	0
20100	0	0	0	0	0	0	0	0	0	0	0	0
20200	0	0	0	0	0	0	0	0	0	0	0	0
20300	0	0	0	0	0.00632911	0	0	0	0	0	0.000632911	0.00200144
20400	0	0	0	0	0	0	0	0	0	0	0	0
20500	0	0	0	0	0	0	0	0	0	0	0	0
20600	0	0	0	0	0	0	0	0	0	0	0	0
20700	0	0	0	0	0	0	0	0	0	0	0	0
20800	0	0	0	0	0	0	0	0	0	0	0	0
20900	0	0	0	0	0	0	0	0	0	0	0	0
21000	0	0	0.00746269	0	0	0	0	0	0	0	0.000746269	0.00235991
21100	0	0	0	0	0	0	0	0	0	0	0	0
21200	0	0.00892857	0	0	0	0	0	0	0	0	0.000892857	0.00282346
21300	0	0.00892857	0	0	0	0	0	0	0	0	0.000892857	0.00282346
21400	0	0	0	0	0	0	0	0	0	0	0	0
21500	0	0	0	0	0	0	0	0	0	0	0	0
21600	0	0	0	0	0	0	0	0	0	0	0	0
21700	0	0	0	0	0	0	0	0	0	0	0	0
21800	0	0	0	0	0	0	0	0	0	0	0	0
21900	0	0	0	0	0	0	0	0	0	0	0	0
22000	0	0	0	0	0	0	0	0	0	0	0	0
22100	0	0	0	0	0	0	0	0	0	0	0	0
22200	0	0	0	0	0	0	0	0	0	0	0	0
22300	0	0	0	0	0	0	0	0	0	0	0	0
22400	0	0	0	0	0	0	0	0	0	0	0	0
22500	0	0	0	0	0	0.00934579	0	0	0	0	0.000934579	0.0029554
22600	0	0	0	0	0	0	0	0	0	0	0	0
22700	0	0	0	0	0	0.00934579	0	0	0	0	0.000934579	0.0029554
22800	0	0	0	0	0	0	0	0	0	0	0	0
22900	0	0	0	0	0	0	0	0	0	0.00444444	0.000444444	0.00140546
23000	0	0	0	0	0.00632911	0	0	0	0	0	0.000632911	0.00200144
23100	0	0	0	0	0	0	0	0	0	0	0	0
23200	0	0	0	0	0	0	0	0	0	0	0	0
23300	0	0	0	0	0	0	0	0	0	0	0	0
23400	0	0	0	0	0	0	0	0	0	0	0	0
23500	0	0	0	0	0	0	0	0	0	0	0	0
23600	0	0	0	0	0	0	0	0	0	0	0	0
23700	0	0	0	0	0	0	0	0	0	0	0	0
23800	0	0	0	0	0	0	0	0	0	0	0	0
23900	0	0	0	0	0	0	0	0	0	0	0	0
24000	0	0	0	0	0	0	0	0	0	0	0	0
24100	0	0	0	0	0	0	0	0	0	0	0	0
24200	0	0	0	0	0	0	0	0	0	0	0	0
24300	0	0	0	0	0	0	0	0	0	0	0	0
24400	0	0	0	0	0	0	0	0	0	0	0	0
24500	0	0	0	0	0	0	0	0	0	0	0	0
24600	0	0	0	0	0	0	0	0	0	0	0	0
24700	0	0	0	0	0.00632911	0	0	0	0	0	0.000632911	0.00200144
24800	0	0	0	0	0	0	0	0	0	0	0	0
24900	0	0	0	0	0	0	0	0	0	0	0	0
25000	0	0	0	0	0	0	0	0	0	0	0	0
25100	0	0	0	0	0	0	0	0	0	0	0	0
25200	0	0	0	0	0	0	0	0	0	0	0	0
25300	0	0	0	0	0	0	0	0	0	0	0	0
25400	0	0	0	0	0	0	0	0	0	0	0	0
25500	0	0	0	0	0	0	0	0	0	0	0	0
25600	0	0	0	0	0	0	0	0	0	0	0	0
25700	0	0.00892857	0	0	0	0	0	0	0	0	0.000892857	0.00282346
25800	0	0	0	0	0	0	0	0	0	0	0	0
25900	0	0	0	0	0	0	0	0	0	0	0	0
26000	0	0	0	0	0	0	0	0	0	0	0	0
26100	0	0	0	0	0	0	0.00617284	0	0	0	0.000617284	0.00195202
26200	0.0121951	0	0	0	0	0	0	0	0	0	0.00121951	0.00385644
26300	0	0	0	0	0	0	0	0	0	0	0	0
26400	0	0	0	0	0	0	0	0	0	0	0	0
26500	0	0	0	0	0	0	0	0	0	0	0	0
26600	0	0	0	0	0.00632911	0	0	0	0	0	0.000632911	0.00200144
26700	0	0	0	0	0	0	0	0	0	0	0	0
26800	0	0	0	0	0	0	0	0	0	0	0	0
26900	0	0	0	0	0	0	0	0	0	0	0	0
27000	0	0	0	0	0	0	0	0	0	0	0	0
27100	0.0121951	0	0	0	0	0	0	0	0	0	0.00121951	0.00385644
27200	0	0	0	0	0	0	0	0	0	0	0	0
27300	0	0	0	0	0	0	0	0	0	0	0	0
27400	0	0	0	0	0	0	0	0	0	0	0	0
27500	0	0	0	0	0	0	0	0	0	0	0	0
27600	0	0	0	0	0	0	0	0	0	0	0	0
27700	0	0	0	0	0	0	0	0	0	0	0	0
27800	0	0	0	0	0	0	0	0	0	0	0	0
27900	0	0	0	0	0	0	0	0	0	0	0	0
28000	0	0	0	0	0	0.00934579	0	0	0	0	0.000934579	0.0029554
28100	0	0	0	0	0	0	0	0	0	0	0	0
28200	0	0	0	0	0	0	0	0	0	0	0	0
28300	0	0	0	0	0	0	0	0	0	0	0	0
28400	0	0	0.00746269	0	0	0	0	0	0	0	0.000746269	0.00235991
28500	0	0	0	0	0	0	0	0	0	0	0	0
28600	0	0	0	0	0	0	0	0	0	0	0	0
28700	0	0	0	0	0	0	0	0	0	0	0	0
28800	0	0	0	0	0	0	0	0	0	0	0	0
28900	0	0	0	0	0	0	0	0	0	0	0	0
29000	0	0	0	0	0	0	0	0	0	0	0	0
29100	0	0	0	0	0	0	0	0	0	0	0	0
29200	0	0	0	0	0	0	0	0	0	0	0	0
29300	0	0	0	0	0	0	0	0	0	0	0	0
29400	0	0	0	0	0	0	0	0	0	0	0	0
29500	0	0	0	0	0	0	0	0	0	0	0	0
29600	0	0	0	0	0	0	0	0	0	0	0	0
29700	0	0	0	0	0	0	0	0	0	0	0	0
29800	0	0	0	0	0	0	0	0	0	0	0	0
29900	0	0	0	0	0	0	0	0	0	0	0	0
30000	0	0	0	0	0	0	0	0	0	0	0	0
30100	0	0	0	0	0	0	0	0	0	0	0	0
30200	0	0	0	0	0	0	0	0	0	0	0	0
30300	0.0121951	0	0	0	0	0	0	0	0	0	0.00121951	0.00385644
30400	0	0	0	0	0	0	0	0	0	0	0	0
30500	0	0	0	0	0	0	0	0	0	0	0	0
30600	0	0	0	0	0	0	0	0	0	0	0	0
30700	0	0	0	0	0	0	0	0	0	0	0	0
30800	0	0	0	0	0	0.00934579	0	0	0	0	0.000934579	0.0029554
30900	0	0	0	0	0	0	0	0	0	0	0	0
31000	0	0	0	0	0	0	0	0	0	0	0	0
31100	0	0	0	0	0	0	0	0	0	0	0	0
31200	0	0	0	0	0	0	0	0	0	0	0	0
31300	0	0	0	0	0	0	0	0	0	0	0	0
31400	0	0	0	0	0	0	0	0	0	0	0	0
31500	0	0	0	0	0	0	0	0	0	0	0	0
31600	0	0	0	0	0	0	0	0	0	0	0	0
31700	0	0	0	0	0	0	0	0	0	0	0	0
31800	0	0	0	0	0	0	0	0	0	0	0	0
31900	0	0	0.00746269	0	0	0	0	0	0	0	0.000746269	0.00235991
32000	0	0	0	0	0	0	0	0	0	0	0	0
32100	0	0	0	0	0	0	0	0	0	0	0	0
32200	0	0	0	0	0	0	0	0	0	0	0	0
32300	0	0	0	0	0	0	0	0	0	0	0	0
32400	0	0	0	0	0	0	0	0	0	0	0	0
32500	0	0	0	0	0	0	0	0	0	0	0	0
32600	0	0	0	0	0	0	0	0	0	0	0	0
32700	0	0	0	0	0	0	0	0	0	0	0	0
32800	0	0	0	0	0	0	0	0	0	0	0	0
32900	0	0	0	0	0	0	0	0	0	0	0	0
33000	0	0	0	0	0	0	0	0	0	0	0	0
33100	0	0	0	0	0	0	0	0	0	0	0	0
33200	0	0	0	0	0	0	0	0	0	0	0	0
33300	0	0	0	0	0	0	0	0	0	0	0	0
33400	0	0	0	0	0	0	0	0	0	0	0	0
33500	0	0	0	0	0	0	0	0	0	0	0	0
33600	0	0	0	0	0	0	0	0	0	0	0	0
33700	0	0	0	0	0	0	0	0	0	0	0	0
33800	0	0	0	0	0	0	0	0	0	0	0	0
33900	0	0	0	0	0	0	0	0	0	0	0	0
34000	0	0	0	0	0	0	0	0	0	0	0	0
34100	0	0	0	0	0	0	0	0	0	0	0	0
34200	0	0	0	0	0.00632911	0	0	0	0	0	0.000632911	0.00200144
34300	0	0	0	0	0.00632911	0	0	0	0	0	0.000632911	0.00200144
34400	0	0	0	0	0	0	0	0	0	0	0	0
34500	0	0	0	0	0	0	0	0	0	0	0	0
34600	0	0	0	0	0	0	0	0	0	0	0	0
34700	0	0	0	0	0	0	0	0	0	0	0	0
34800	0	0	0	0	0	0	0	0	0	0	0	0
34900	0	0	0	0	0	0	0	0	0	0	0	0
35000	0	0	0	0	0	0	0	0	0	0	0	0
35100	0	0	0	0	0	0	0	0	0	0	0	0
35200	0	0	0	0	0	0	0	0	0	0	0	0
35300	0	0	0	0	0	0	0	0	0	0	0	0
35400	0	0	0	0	0	0	0	0	0	0	0	0
35500	0	0	0	0	0	0	0	0	0	0	0	0
35600	0	0	0	0	0	0	0	0	0	0	0	0
35700	0	0	0	0	0	0	0	0	0	0	0	0
35800	0	0	0	0	0	0	0	0	0.0049505	0	0.00049505	0.00156548
35900	0	0	0	0	0	0	0	0	0	0	0	0
36000	0	0	0	0	0	0	0	0	0	0	0	0
36100	0	0	0	0	0	0	0	0	0	0	0	0
36200	0	0	0	0	0	0	0	0	0	0	0	0
36300	0	0	0	0	0	0	0	0	0	0	0	0
36400	0	0	0	0	0	0	0	0	0	0	0	0
36500	0	0	0	0	0	0	0	0	0	0	0	0
36600	0	0	0	0	0	0	0	0	0	0	0	0
36700	0	0	0	0	0	0	0	0	0	0	0	0
36800	0	0	0	0	0	0	0	0	0	0	0	0
36900	0	0	0	0	0	0	0	0	0	0	0	0
37000	0	0	0	0	0	0	0	0	0	0	0	0
37100	0	0	0	0	0	0	0	0	0	0	0	0
37200	0	0	0	0	0	0	0	0	0	0	0	0
37300	0	0	0	0	0	0	0	0	0	0	0	0
37400	0	0	0	0	0	0	0	0	0	0	0	0
37500	0	0	0.00746269	0	0	0	0	0	0	0	0.000746269	0.00235991
37600	0	0	0	0	0	0	0	0	0	0	0	0
37700	0	0	0	0	0	0	0	0	0	0	0	0
37800	0	0	0	0	0	0	0	0	0	0	0	0
37900	0	0	0	0	0	0	0	0	0	0	0	0
38000	0	0	0	0	0	0	0	0	0	0	0	0
38100	0	0	0	0	0	0	0	0	0	0	0	0
38200	0	0	0	0	0	0	0	0	0	0	0	0
38300	0	0	0	0	0	0	0	0	0	0	0	0
38400	0	0	0	0	0	0	0	0	0	0	0	0
38500	0	0	0	0	0	0	0	0	0	0	0	0
38600	0	0	0	0	0	0	0	0	0	0	0	0
38700	0	0	0	0	0	0	0	0	0	0	0	0
38800	0	0	0	0	0	0	0	0	0	0	0	0
38900	0	0	0	0	0	0	0	0	0	0	0	0
39000	0	0	0	0	0	0	0	0	0	0	0	0
39100	0	0	0	0	0	0	0	0	0	0	0	0
39200	0	0	0	0	0	0	0	0	0	0	0	0
39300	0	0	0	0.0037594	0	0	0	0	0	0	0.00037594	0.00118883
39400	0	0	0	0	0	0	0	0	0	0	0	0
39500	0	0	0	0	0	0	0	0	0	0	0	0
39600	0	0	0.00746269	0	0	0	0	0	0	0	0.000746269	0.00235991
39700	0	0	0	0	0	0	0	0	0	0	0	0
39800	0	0	0	0	0	0	0	0	0	0	0	0
39900	0	0	0	0	0	0	0	0	0	0	0	0
40000	0	0	0	0	0	0	0	0	0	0	0	0
40100	0	0	0	0	0	0	0	0	0	0	0	0
40200	0	0	0	0	0	0	0	0	0	0	0	0
40300	0	0	0	0	0	0	0	0	0	0	0	0
40400	0	0	0	0	0	0	0	0	0	0	0	0
40500	0	0	0	0	0	0	0	0	0	0	0	0
40600	0	0	0	0	0	0	0	0	0	0	0	0
40700	0	0	0	0	0	0	0	0	0	0	0	0
40800	0	0	0	0	0	0	0	0	0	0	0	0
40900	0	0	0	0	0	0	0	0	0	0	0	0
41000	0	0	0	0	0	0	0	0	0	0	0	0
41100	0	0	0	0	0	0	0	0	0	0	0	0
41200	0	0	0	0	0	0	0	0	0	0	0	0
41300	0	0	0	0	0	0	0	0	0	0	0	0
41400	0	0	0	0	0	0	0	0	0	0	0	0
41500	0	0	0	0	0	0	0	0	0	0	0	0
41600	0	0	0	0	0	0	0	0	0	0	0	0
41700	0	0	0	0	0	0	0	0	0	0	0	0
41800	0	0	0	0	0	0	0	0	0	0	0	0
41900	0	0	0	0	0	0	0	0	0	0	0	0
42000	0	0	0	0	0	0	0	0	0	0	0	0
42100	0	0	0	0	0	0	0	0	0	0	0	0
42200	0	0	0	0	0	0	0	0	0	0	0	0
42300	0	0	0	0	0	0	0	0	0	0	0	0
42400	0	0	0	0	0	0	0	0	0	0	0	0
42500	0	0	0	0	0	0	0	0	0	0	0	0
42600	0	0	0	0	0	0	0	0	0	0	0	0
42700	0	0	0	0	0	0	0	0	0	0	0	0
42800	0	0	0	0	0	0	0	0	0	0	0	0
42900	0	0	0	0	0	0	0	0	0	0	0	0
43000	0	0	0	0	0	0	0	0	0	0	0	0
43100	0	0	0	0	0	0	0	0	0	0.00444444	0.000444444	0.00140546
43200	0	0	0	0	0	0	0	0	0	0	0	0
43300	0	0	0	0	0	0	0	0	0	0	0	0
43400	0	0	0	0	0	0	0	0	0	0	0	0
43500	0	0	0	0	0	0	0	0	0	0	0	0
43600	0	0	0	0	0	0	0	0	0	0	0	0
43700	0	0	0	0	0	0	0	0	0	0	0	0
43800	0	0	0	0	0	0	0	0	0	0	0	0
43900	0	0	0	0	0	0	0	0	0	0	0	0
44000	0	0	0	0	0	0	0	0	0	0	0	0
44100	0	0	0	0	0	0	0	0	0	0	0	0
44200	0	0	0	0	0	0	0	0	0	0	0	0
44300	0	0	0	0	0	0	0	0	0	0	0	0
44400	0	0	0	0	0	0	0	0	0	0	0	0
44500	0	0	0	0	0	0	0	0	0	0	0	0
44600	0	0	0	0	0	0	0	0	0	0	0	0
44700	0	0	0	0	0	0	0	0	0	0	0	0
44800	0	0	0	0	0	0	0	0	0	0	0	0
44900	0	0	0	0	0	0	0	0	0	0	0	0
45000	0	0	0	0	0	0	0	0	0	0	0	0
45100	0	0	0	0	0	0	0	0	0	0	0	0
45200	0	0	0	0	0	0	0	0	0	0	0	0
45300	0	0	0	0	0	0	0	0	0	0	0	0
45400	0	0	0	0	0	0	0	0	0	0	0	0
45500	0.0121951	0	0	0	0	0	0	0	0	0	0.00121951	0.00385644
45600	0	0	0	0	0	0	0	0	0	0	0	0
45700	0	0	0	0	0	0	0	0	0	0	0	0
45800	0	0	0	0	0	0	0	0	0	0	0	0
45900	0	0	0	0	0	0	0	0	0	0	0	0
46000	0	0	0	0	0	0	0	0	0	0	0	0
46100	0	0	0	0	0	0	0	0	0	0	0	0
46200	0	0	0	0	0	0	0.00617284	0	0	0	0.000617284	0.00195202
46300	0	0	0	0	0	0	0	0	0	0	0	0
46400	0	0	0	0	0	0.00934579	0	0	0	0	0.000934579	0.0029554
46500	0	0	0	0	0	0	0	0	0	0	0	0
46600	0	0	0	0	0	0	0	0	0	0	0	0
46700	0	0	0	0	0	0	0	0	0	0	0	0
46800	0	0	0	0	0	0	0	0	0	0	0	0
46900	0	0	0	0	0	0	0	0	0	0	0	0
47000	0	0	0	0	0	0	0	0	0	0	0	0
47100	0	0	0	0	0	0	0	0	0	0	0	0
47200	0	0	0	0	0	0	0	0	0	0	0	0
47300	0	0	0	0	0	0	0	0	0	0	0	0
47400	0	0	0	0	0	0	0	0	0	0	0	0
47500	0	0	0	0	0	0	0	0	0	0	0	0
47600	0	0	0	0	0	0	0	0	0	0	0	0
47700	0	0	0	0	0	0	0	0	0	0	0	0
47800	0	0	0	0	0	0	0	0	0	0	0	0
47900	0	0	0	0	0	0	0	0	0	0	0	0
48000	0	0	0	0	0	0	0	0	0	0	0	0
48100	0	0	0	0	0	0	0	0	0	0	0	0
48200	0	0	0	0	0	0	0	0	0	0	0	0
48300	0	0	0	0	0	0	0	0	0	0	0	0
48400	0	0	0	0	0	0	0	0	0	0	0	0
48500	0	0	0	0	0	0	0	0	0	0	0	0
48600	0	0	0	0	0	0	0	0	0	0	0	0
48700	0	0	0	0	0	0	0	0	0	0	0	0
48800	0.0121951	0	0	0	0	0	0	0	0	0	0.00121951	0.00385644
48900	0	0	0	0	0	0	0	0	0	0	0	0
49000	0	0	0	0	0	0	0	0	0	0	0	0
49100	0	0	0	0	0	0	0	0	0	0	0	0
49200	0	0	0	0	0	0	0	0	0	0	0	0
49300	0	0	0	0	0	0	0	0	0	0	0	0
49400	0	0	0	0	0	0	0	0	0	0	0	0
49500	0	0	0	0	0	0	0	0	0	0	0	0
49600	0	0	0	0	0	0	0	0	0	0	0	0
49700	0	0	0	0	0	0	0	0	0	0	0	0
49800	0	0	0	0	0	0	0	0	0	0	0	0
49900	0	0	0	0	0	0	0	0	0	0	0	0
50000	0	0	0	0	0	0	0	0	0	0	0	0
50100	0	0	0	0	0	0	0	0	0	0	0	0
50200	0	0	0	0	0	0	0	0	0	0	0	0
50300	0	0	0	0	0	0	0	0	0	0	0	0
50400	0	0	0	0	0	0	0	0	0	0	0	0
50500	0	0	0	0	0	0	0	0	0	0	0	0
50600	0	0	0	0	0	0	0	0	0	0	0	0
50700	0	0	0	0	0	0	0	0	0	0	0	0
50800	0	0	0	0	0	0	0	0	0	0	0	0
50900	0	0	0	0	0	0	0	0	0	0	0	0
51000	0	0	0	0	0	0	0	0	0	0	0	0
51100	0	0	0	0	0	0	0	0	0	0	0	0
51200	0	0	0	0	0	0	0	0	0	0	0	0
51300	0	0	0	0	0	0	0	0	0	0	0	0
51400	0	0	0	0	0	0	0	0	0	0	0	0
51500	0	0	0	0	0	0	0	0	0	0	0	0
51600	0	0	0	0	0	0	0	0	0	0	0	0
51700	0	0	0	0	0	0	0	0	0	0	0	0
51800	0	0	0	0	0	0	0	0	0	0	0	0
51900	0	0	0	0	0	0	0	0	0	0	0	0
52000	0	0	0	0	0	0	0	0	0	0	0	0
52100	0	0	0	0	0	0	0	0	0	0	0	0
52200	0	0	0	0	0	0	0	0	0	0	0	0
52300	0	0	0	0	0	0	0	0	0	0	0	0
52400	0	0	0	0	0	0	0	0	0	0	0	0
52500	0	0	0	0	0	0	0	0	0	0	0	0
52600	0	0	0	0	0	0	0	0	0	0	0	0
52700	0	0	0	0	0	0	0	0	0	0	0	0
52800	0	0	0	0	0	0	0	0	0	0	0	0
52900	0	0	0	0	0	0	0	0	0	0	0	0
53000	0	0	0	0	0	0	0	0	0	0	0	0
53100	0	0	0	0	0	0	0	0	0	0	0	0
53200	0	0	0	0	0	0	0	0	0	0	0	0
53300	0.0121951	0	0	0	0	0	0	0	0	0	0.00121951	0.00385644
53400	0	0	0	0	0	0	0	0	0	0	0	0
53500	0	0	0	0	0	0	0	0	0	0	0	0
53600	0	0	0	0	0	0	0	0	0	0	0	0
53700	0	0	0	0	0	0	0	0	0	0	0	0
53800	0	0	0	0	0	0	0	0	0	0	0	0
53900	0	0	0	0	0	0	0	0	0	0	0	0
54000	0	0	0	0	0	0	0	0	0	0	0	0
54100	0	0	0	0	0	0	0	0	0	0	0	0
54200	0	0	0	0	0	0	0	0	0	0	0	0
54300	0	0	0	0	0	0	0	0	0	0	0	0
54400	0	0	0	0	0	0	0	0	0	0	0	0
54500	0	0	0	0	0	0	0	0	0	0	0	0
54600	0	0	0	0	0	0	0	0	0	0	0	0
54700	0	0	0	0	0	0	0	0	0	0	0	0
54800	0	0	0	0	0	0	0	0	0	0	0	0
54900	0	0	0	0	0	0	0	0	0	0	0	0
55000	0	0	0	0	0	0	0	0	0	0	0	0
55100	0	0	0	0	0	0	0	0	0	0	0	0
55200	0	0	0	0	0	0	0	0	0	0	0	0
55300	0	0	0	0	0	0	0	0	0	0	0	0
55400	0	0	0	0	0	0	0	0	0	0	0	0
55500	0	0	0	0	0	0	0	0	0	0	0	0
55600	0	0	0	0	0	0	0	0	0	0	0	0
55700	0	0	0	0	0	0	0	0	0	0	0	0
55800	0	0	0	0	0	0	0	0	0	0	0	0
55900	0	0	0	0	0	0	0	0	0	0	0	0
56000	0	0	0	0	0	0	0	0	0	0	0	0
56100	0	0	0	0	0	0	0	0	0	0	0	0
56200	0	0	0	0	0	0	0	0	0	0	0	0
56300	0	0	0	0	0	0	0	0	0	0	0	0
56400	0	0	0	0	0	0	0	0	0	0	0	0
56500	0	0	0	0	0	0	0	0	0	0	0	0
56600	0	0	0	0	0	0	0	0	0	0	0	0
56700	0	0	0	0	0	0	0	0	0	0	0	0
56800	0	0	0	0	0	0	0	0	0	0	0	0
56900	0	0	0	0	0	0	0	0	0	0	0	0
57000	0	0	0	0	0	0	0	0	0	0	0	0
57100	0	0	0	0	0	0	0	0	0	0	0	0
57200	0	0	0	0	0	0	0	0	0	0	0	0
57300	0	0	0	0	0	0	0	0	0	0	0	0
57400	0	0	0	0	0	0	0	0	0	0	0	0
57500	0	0	0	0	0	0	0	0	0	0	0	0
57600	0	0	0	0	0	0	0	0	0	0	0	0
57700	0	0	0	0	0	0	0	0	0	0	0	0
57800	0	0	0	0	0	0	0	0	0	0	0	0
57900	0	0	0	0	0	0	0	0	0	0	0	0
58000	0	0	0	0	0	0	0	0	0	0	0	0
58100	0	0	0	0	0	0	0	0	0	0	0	0
58200	0	0.00892857	0	0	0	0	0	0	0	0	0.000892857	0.00282346
58300	0	0	0	0	0	0	0	0	0	0	0	0
58400	0	0	0	0	0	0	0	0	0	0	0	0
58500	0	0	0	0	0	0	0	0	0	0	0	0
58600	0	0	0	0	0	0	0	0	0	0	0	0
58700	0	0	0	0	0	0	0	0	0	0	0	0
58800	0	0	0	0	0	0	0	0	0	0	0	0
58900	0	0	0	0	0	0	0	0	0	0	0	0
59000	0	0	0	0	0	0	0	0	0	0	0	0
59100	0	0	0	0	0	0	0	0	0	0	0	0
59200	0	0	0	0	0	0	0	0	0	0	0	0
59300	0	0	0	0	0	0	0	0	0	0	0	0
59400	0	0	0	0	0	0	0	0	0	0	0	0
59500	0	0	0	0	0	0	0	0	0	0	0	0
59600	0	0	0	0	0	0	0	0	0	0	0	0
59700	0	0	0	0	0	0	0	0	0	0	0	0
59800	0	0	0	0	0	0	0	0	0	0	0	0
59900	0	0	0	0	0	0	0	0	0	0	0	0
60000	0	0	0	0	0	0	0	0	0	0	0	0
60100	0	0	0	0	0	0	0	0	0	0	0	0
60200	0	0	0	0	0	0	0	0	0	0	0	0
60300	0	0	0	0	0	0	0	0	0	0	0	0
60400	0	0	0	0	0	0	0	0	0	0	0	0
60500	0	0	0	0	0	0	0	0	0	0	0	0
60600	0	0	0	0	0	0	0	0	0	0	0	0
60700	0	0	0	0	0	0	0	0	0	0	0	0
60800	0	0	0	0	0	0	0	0	0	0	0	0
60900	0	0	0	0	0	0	0	0	0	0	0	0
61000	0	0	0	0	0	0	0	0	0	0	0	0
61100	0	0	0	0	0	0	0	0	0	0	0	0
61200	0	0	0	0	0	0	0	0	0	0	0	0
61300	0	0	0	0	0	0	0	0	0	0	0	0
61400	0	0	0	0	0	0	0	0	0	0	0	0
61500	0	0	0	0	0	0	0	0	0	0	0	0
61600	0	0	0	0	0	0	0	0	0	0	0	0
61700	0	0	0	0	0	0	0	0	0	0	0	0
61800	0	0	0	0	0	0	0	0	0	0	0	0
61900	0	0	0	0	0	0	0	0	0	0	0	0
62000	0	0	0	0	0	0	0	0	0	0	0	0
62100	0	0	0	0	0	0	0	0	0	0	0	0
62200	0	0	0	0	0	0	0	0	0	0	0	0
62300	0	0	0	0	0	0	0	0	0	0	0	0
62400	0	0	0	0	0	0	0	0	0	0	0	0
62500	0	0	0	0	0	0	0	0	0	0	0	0
62600	0	0	0	0	0	0	0	0	0	0	0	0
62700	0	0	0	0	0	0	0	0	0	0	0	0
62800	0	0	0	0	0	0	0	0	0	0	0	0
62900	0	0	0	0	0	0	0	0	0	0	0	0
63000	0	0	0	0	0	0	0	0	0	0	0	0
63100	0	0	0	0	0	0	0	0	0	0	0	0
63200	0	0	0	0	0	0	0	0	0	0	0	0
63300	0	0	0	0	0	0	0	0	0	0	0	0
63400	0	0	0	0	0	0	0	0	0	0	0	0
63500	0	0	0	0	0	0	0	0	0	0	0	0
63600	0	0	0	0	0	0	0	0	0	0	0	0
63700	0	0	0	0	0	0	0	0	0	0	0	0
63800	0	0	0	0	0	0	0	0	0	0	0	0
63900	0	0	0	0	0	0	0	0	0	0	0	0
64000	0	0	0	0	0	0	0	0	0	0	0	0
64100	0	0	0	0	0	0	0	0	0	0	0	0
64200	0	0	0	0	0	0	0	0	0	0	0	0
64300	0	0	0	0	0	0	0	0	0	0	0	0
64400	0	0	0	0	0	0	0	0	0	0	0	0
64500	0	0	0	0	0	0	0	0	0	0	0	0
64600	0	0	0	0	0	0	0	0	0	0	0	0
64700	0	0	0	0	0	0	0	0	0	0	0	0
64800	0	0	0	0	0	0	0	0	0	0	0	0
64900	0	0	0	0	0	0	0	0	0	0	0	0
65000	0	0	0	0	0	0	0	0	0	0	0	0
65100	0	0	0	0	0	0	0	0	0	0	0	0
65200	0	0	0	0	0	0	0	0	0	0	0	0
65300	0	0	0	0	0	0	0	0	0	0	0	0
65400	0	0	0	0	0	0	0	0	0	0	0	0
65500	0	0	0	0	0	0	0	0	0	0	0	0
65600	0	0	0	0	0	0	0	0	0	0	0	0
65700	0	0	0	0	0	0	0	0	0	0	0	0
65800	0	0	0	0	0	0	0	0	0	0	0	0
65900	0	0	0	0	0	0	0	0	0	0	0	0
66000	0	0	0	0	0	0	0	0	0	0	0	0
66100	0	0	0	0	0	0	0	0	0	0	0	0
66200	0	0	0	0	0	0	0	0	0	0	0	0
66300	0	0	0	0	0	0	0	0	0	0	0	0
66400	0	0	0	0	0	0	0	0	0	0	0	0
66500	0	0	0	0	0	0	0	0	0	0	0	0
66600	0	0	0	0	0	0	0	0	0	0	0	0
66700	0	0	0	0	0	0	0	0	0	0	0	0
66800	0	0	0	0	0	0	0	0	0	0	0	0
66900	0	0	0	0	0	0	0	0	0	0	0	0
67000	0	0	0	0	0	0	0	0	0	0	0	0
67100	0	0	0	0	0	0	0	0	0	0	0	0
67200	0	0	0	0	0	0	0	0	0	0	0	0
67300	0	0	0	0	0	0	0	0	0	0	0	0
67400	0	0	0	0	0	0	0	0	0	0	0	0
67500	0	0	0	0	0	0	0	0	0	0	0	0
67600	0	0	0	0	0	0	0	0	0	0	0	0
67700	0	0	0	0	0	0	0	0	0	0	0	0
67800	0	0	0	0	0	0	0	0	0	0	0	0
67900	0	0	0	0	0	0	0	0	0	0	0	0
68000	0	0	0	0	0	0	0	0	0	0	0	0
68100	0	0	0	0	0	0	0	0	0	0	0	0
68200	0	0	0	0	0	0	0	0	0	0	0	0
68300	0	0	0	0	0	0	0	0	0	0	0	0
68400	0	0	0	0	0	0	0	0	0	0	0	0
68500	0	0	0	0	0	0	0	0	0	0	0	0
68600	0	0	0	0	0	0	0	0	0	0	0	0
68700	0	0	0	0	0	0	0	0	0	0	0	0
68800	0	0	0	0	0	0	0.00617284	0	0	0	0.000617284	0.00195202
68900	0	0	0	0	0	0	0	0	0	0	0	0
69000	0	0	0	0	0	0	0	0	0	0	0	0
69100	0	0	0	0	0	0	0	0	0	0	0	0
69200	0	0	0	0	0	0	0	0	0	0	0	0
69300	0	0	0	0	0	0	0	0	0	0	0	0
69400	0	0	0	0	0	0	0	0	0	0	0	0
69500	0	0	0	0	0	0	0	0	0	0	0	0
69600	0	0	0	0	0	0	0	0	0	0	0	0
69700	0	0	0	0	0	0	0	0	0	0	0	0
69800	0	0	0	0	0	0	0	0	0	0	0	0
69900	0	0	0	0	0	0	0	0	0	0	0	0
70000	0	0	0	0	0	0	0	0	0	0	0	0
70100	0	0	0	0	0	0	0	0	0	0	0	0
70200	0	0	0	0	0	0	0	0	0	0	0	0
70300	0	0	0	0	0	0	0	0	0	0	0	0
70400	0	0	0	0	0	0	0	0	0	0	0	0
70500	0	0	0	0	0	0	0	0	0	0	0	0
70600	0	0	0	0	0	0	0	0	0	0	0	0
70700	0	0	0	0	0	0	0	0	0	0	0	0
70800	0	0	0	0	0	0	0	0	0	0	0	0
70900	0	0	0	0	0	0	0	0	0	0	0	0
71000	0	0	0	0	0	0	0	0	0	0	0	0
71100	0	0	0	0	0	0	0	0	0	0	0	0
71200	0	0	0	0	0	0	0.00617284	0	0	0	0.000617284	0.00195202
71300	0	0	0	0	0	0	0	0	0	0	0	0
71400	0	0	0	0	0	0	0	0	0	0	0	0
71500	0	0	0	0	0	0	0	0	0	0	0	0
71600	0	0	0	0	0	0	0	0	0	0	0	0
71700	0	0	0	0	0	0	0	0	0	0	0	0
71800	0	0	0	0	0	0	0	0	0	0	0	0
71900	0	0	0	0	0	0	0	0	0	0	0	0
72000	0	0	0	0	0	0	0	0	0	0	0	0
72100	0	0	0	0	0	0	0	0	0	0	0	0
72200	0	0	0	0	0	0	0	0	0	0	0	0
72300	0	0	0	0	0	0	0	0	0	0	0	0
72400	0	0	0	0	0	0	0	0	0	0	0	0
72500	0	0	0	0	0	0	0	0	0	0	0	0
72600	0	0	0	0	0	0	0	0	0	0	0	0
72700	0	0	0	0	0	0	0	0	0	0	0	0
72800	0	0	0	0	0	0	0	0	0	0	0	0
72900	0	0	0	0	0	0	0	0	0	0	0	0
73000	0	0	0	0	0	0	0	0	0	0	0	0
73100	0	0	0	0	0	0	0	0	0	0	0	0
73200	0	0	0	0	0	0	0	0	0	0	0	0
73300	0	0	0	0	0	0	0	0	0	0	0	0
73400	0	0	0	0	0	0	0	0	0	0	0	0
73500	0	0	0	0	0	0	0	0	0	0	0	0
73600	0	0	0	0	0	0	0	0	0	0	0	0
73700	0	0	0	0	0	0	0	0	0	0	0	0
73800	0	0	0	0	0	0	0	0	0	0	0	0
73900	0	0	0	0	0	0	0	0	0	0	0	0
74000	0	0	0	0	0	0	0	0	0	0	0	0
74100	0	0	0	0	0	0	0	0	0	0	0	0
74200	0	0	0	0	0	0	0	0	0	0	0	0
74300	0	0	0	0	0	0	0	0	0	0	0	0
74400	0	0	0	0	0	0	0	0	0	0	0	0
74500	0	0	0	0	0	0	0	0	0	0	0	0
74600	0	0	0	0	0	0	0	0	0	0	0	0
74700	0	0	0	0	0	0	0	0	0	0	0	0
74800	0	0	0	0	0	0	0	0	0	0	0	0
74900	0	0	0	0	0	0	0	0	0	0	0	0
75000	0	0	0	0	0	0	0	0	0	0	0	0
75100	0	0	0	0	0	0	0	0	0	0	0	0
75200	0	0	0	0	0	0	0	0	0	0	0	0
75300	0	0	0	0	0	0	0	0	0	0	0	0
75400	0	0	0	0	0	0	0	0	0	0	0	0
75500	0	0	0	0	0	0	0	0	0	0	0	0
75600	0	0	0	0	0	0	0	0	0	0	0	0
75700	0	0	0	0	0	0	0	0	0	0	0	0
75800	0	0	0	0	0	0	0	0	0	0	0	0
75900	0	0	0	0	0	0	0	0	0	0	0	0
76000	0	0	0	0	0	0	0	0	0	0	0	0
76100	0	0	0	0	0	0	0	0	0	0	0	0
76200	0	0	0	0	0	0	0	0	0	0	0	0
76300	0	0	0	0	0	0	0	0	0	0	0	0
76400	0	0	0	0	0	0	0	0	0	0	0	0
76500	0	0	0	0	0	0	0	0	0	0	0	0
76600	0	0	0	0	0	0	0	0	0	0	0	0
76700	0	0	0	0	0	0	0	0	0	0	0	0
76800	0	0	0	0	0	0	0	0	0	0	0	0
76900	0	0	0	0	0	0	0	0	0	0	0	0
77000	0	0	0	0	0	0	0	0	0	0	0	0
77100	0	0	0	0	0	0	0	0	0	0	0	0
77200	0	0	0	0	0	0	0	0	0	0	0	0
77300	0	0	0	0	0	0	0	0	0	0	0	0
77400	0	0.00892857	0	0	0	0	0	0	0	0	0.000892857	0.00282346
77500	0	0	0	0	0	0	0	0	0	0	0	0
77600	0	0	0	0	0	0	0	0	0	0	0	0
77700	0	0	0	0	0	0	0	0	0	0	0	0
77800	0	0	0	0	0	0	0	0	0	0	0	0
77900	0	0	0	0	0	0	0	0	0	0	0	0
78000	0	0	0	0	0	0	0	0	0	0	0	0
78100	0	0	0	0	0	0	0	0	0	0	0	0
78200	0	0	0	0	0	0	0	0	0	0	0	0
78300	0	0	0	0	0	0	0	0	0	0	0	0
78400	0	0	0	0	0	0	0	0	0	0	0	0
78500	0	0	0	0	0	0	0	0	0	0	0	0
78600	0	0	0	0	0	0	0	0	0	0	0	0
78700	0	0	0	0	0	0	0	0	0	0	0	0
78800	0	0	0	0	0	0	0	0	0	0	0	0
78900	0	0	0	0	0	0	0	0	0	0	0	0
79000	0	0	0	0	0	0	0	0	0	0	0	0
79100	0	0	0	0	0	0	0	0	0	0	0	0
79200	0	0	0	0	0	0	0	0	0	0	0	0
79300	0	0	0	0	0	0	0	0	0	0	0	0
79400	0	0	0	0	0	0	0	0	0	0	0	0
79500	0	0	0	0	0	0	0	0	0	0	0	0
79600	0	0	0	0	0	0	0	0	0	0	0	0
79700	0	0	0	0	0	0	0	0	0	0	0	0
79800	0	0	0	0	0	0	0	0	0	0	0	0
79900	0	0	0	0	0	0	0	0	0	0	0	0
80000	0	0	0	0	0	0	0	0	0	0	0	0
80100	0	0	0	0	0	0	0	0	0	0	0	0
80200	0	0	0	0	0	0	0	0	0	0	0	0
80300	0	0	0	0	0	0	0	0	0	0	0	0
80400	0	0	0	0	0	0	0	0	0	0	0	0
80500	0	0	0	0	0	0	0	0	0	0	0	0
80600	0	0	0	0	0	0	0	0	0	0	0	0
80700	0	0	0	0	0	0	0	0	0	0	0	0
80800	0	0	0	0	0	0	0	0	0	0	0	0
80900	0	0	0	0	0	0	0	0	0	0	0	0
81000	0	0	0	0	0	0	0	0	0	0	0	0
81100	0	0	0	0	0	0	0	0	0	0	0	0
81200	0	0	0	0	0	0	0	0	0	0	0	0
81300	0	0	0	0	0	0	0	0	0	0	0	0
81400	0	0	0	0	0	0	0	0	0	0	0	0
81500	0	0	0	0	0	0	0	0	0	0	0	0
81600	0	0	0	0	0	0	0	0	0	0	0	0
81700	0	0	0	0	0	0	0	0	0	0	0	0
81800	0	0	0	0	0	0	0	0	0	0	0	0
81900	0	0	0	0	0	0	0	0	0	0	0	0
82000	0	0	0	0	0	0	0	0	0	0	0	0
82100	0	0	0	0	0	0	0	0	0	0	0	0
82200	0	0	0	0	0	0	0	0	0	0	0	0
82300	0	0	0	0	0	0	0	0	0	0	0	0
82400	0	0	0	0	0	0	0	0	0	0	0	0
82500	0	0	0	0	0	0	0	0	0	0	0	0
82600	0	0	0	0	0	0	0	0	0	0	0	0
82700	0	0	0	0	0	0	0	0	0	0	0	0
82800	0	0	0	0	0	0	0	0	0	0	0	0
82900	0	0	0	0	0	0	0	0	0	0	0	0
83000	0	0	0	0	0	0	0	0	0	0	0	0
83100	0	0	0	0	0	0	0	0	0	0	0	0
83200	0	0	0	0	0	0	0	0	0	0	0	0
83300	0	0	0	0	0	0	0	0	0	0	0	0
83400	0	0	0	0	0	0	0	0	0	0	0	0
83500	0.0121951	0	0	0	0	0	0	0	0	0	0.00121951	0.00385644
83600	0	0	0	0	0	0	0	0	0	0	0	0
83700	0	0	0	0	0	0	0	0	0	0	0	0
83800	0	0	0	0	0	0	0	0	0	0	0	0
83900	0	0	0	0	0	0	0	0	0	0	0	0
84000	0	0	0	0	0	0	0	0	0	0	0	0
84100	0	0	0	0	0	0	0	0	0	0	0	0
84200	0	0	0	0	0	0	0	0	0	0	0	0
84300	0	0	0	0	0	0	0	0	0	0	0	0
84400	0	0	0	0	0	0	0	0	0	0	0	0
84500	0	0	0	0	0	0	0	0	0	0	0	0
84600	0	0	0	0	0	0	0	0	0	0	0	0
84700	0	0	0	0	0	0	0	0	0	0	0	0
84800	0	0	0	0	0	0	0	0	0	0	0	0
84900	0	0	0	0	0	0	0	0	0	0	0	0
85000	0	0	0	0	0	0	0	0	0	0	0	0
85100	0	0	0	0	0	0	0	0	0	0	0	0
85200	0	0	0	0	0	0	0	0	0	0	0	0
85300	0	0	0.00746269	0	0	0	0	0	0	0	0.000746269	0.00235991
