# Supplementary material for: State-dependent activity dynamics of hypothalamic stress effector neurons
Source: eLife journal article supplement (doi:10.7554/elife.76832), 2022-06-30
Supplement: supp [file elife_poa_e76832_Figure_3_source_data_1.xlsx]

## Sheet: Fig 3E 3F
Figure 3E - Sciatic Nerve Stim Response - Firing Rate Time Course - Bursts																	Figure 3F - Sciatic Nerve Stim Response - Firing Rate Time Course - Single Spikes
	Firing Rate (bursts/s)																	Firing Rate (spikes/s)
Time	Unit2	Unit3	Unit6	Unit8	Unit12	Unit13	Unit16	Unit18	Unit20	Unit24	Unit25	Unit27	Unit30	Mean	SD		Time	Unit2	Unit3	Unit6	Unit8	Unit12	Unit13	Unit16	Unit18	Unit20	Unit24	Unit25	Unit27	Unit30	Mean	SD
-4.75	0.2	0.133333	0.6	0.6	0	0	0	0	0.133333	0	0	0.0666667	0.0666667	0.138462	0.2151		-4.75	2.6	2.8	2	3.26667	3.66667	1.33333	3.4	1.86667	1.26667	6.6	0.933333	3.46667	5.53333	2.97949	1.65337
-4.5	0.0666667	0.2	0.266667	0.4	0	0	0.2	0	0	0	0	0.533333	0	0.128205	0.179426		-4.5	3.06667	3.66667	2.33333	5.13333	4.26667	3.86667	3.93333	2.13333	1.73333	5.73333	1.53333	4.46667	4.4	3.55897	1.31333
-4.25	0.0666667	0.133333	0.533333	0.333333	0	0	0.0666667	0	0	0	0	0.266667	0	0.107692	0.168959		-4.25	2.73333	3.6	1.93333	3	6.06667	2.4	4.53333	1.6	1.06667	6.8	1.46667	5.6	5.26667	3.54359	1.91985
-4	0.0666667	0.333333	0.6	0.466667	0.0666667	0	0	0.0666667	0.2	0	0	0.133333	0	0.148718	0.198427		-4	2.6	3.86667	2.2	2.66667	4.33333	4	5.33333	1.73333	1.26667	7.46667	1.93333	5.73333	5.86667	3.76923	1.90567
-3.75	0	0.4	0.8	0.6	0	0	0	0	0.0666667	0	0	0.133333	0	0.153846	0.269958		-3.75	2.8	4.26667	1.8	4.2	3.86667	2.93333	5.4	2.2	2.2	6.13333	2.2	4.93333	5.46667	3.72308	1.46638
-3.5	0.0666667	0.333333	0.2	0.333333	0	0	0.133333	0	0.266667	0	0	0.266667	0	0.123077	0.138367		-3.5	2.26667	4.13333	2.26667	4.6	4.2	3.6	4.73333	1.33333	2	7.53333	1.8	4.46667	5.26667	3.70769	1.73857
-3.25	0.0666667	0.133333	0.4	0.2	0.0666667	0.133333	0.0666667	0	0.0666667	0	0	0.2	0	0.102564	0.11423		-3.25	1.73333	4.93333	2	4.13333	4.13333	3.86667	4.2	1.86667	1.86667	7.4	1.26667	5.4	6.13333	3.7641	1.91536
-3	0.133333	0.2	0.533333	0.666667	0.0666667	0.133333	0.0666667	0	0.0666667	0	0	0.133333	0	0.153846	0.209735		-3	2.06667	3.46667	1.86667	2.33333	5.46667	2.93333	5.2	2.66667	1.66667	6.53333	1.13333	5.13333	5.8	3.55897	1.82423
-2.75	0.133333	0.0666667	0.4	0.2	0	0	0.133333	0.0666667	0.333333	0	0	0	0	0.102564	0.135032		-2.75	2.8	3.46667	2.26667	2.2	5	2.13333	3.06667	1.8	2.33333	6.66667	2.06667	4.53333	4.2	3.27179	1.44977
-2.5	0.2	0.133333	0.533333	0.6	0	0	0.0666667	0	0.0666667	0	0.0666667	0.2	0	0.14359	0.201561		-2.5	2.66667	3.2	1.73333	3.06667	4.53333	3.2	3.8	1.8	1.8	6.53333	2	3.73333	4.8	3.29744	1.40781
-2.25	0.2	0.0666667	0.4	0.266667	0	0	0.0666667	0	0.0666667	0	0	0.333333	0	0.107692	0.142825		-2.25	2.8	4.33333	1.4	4.13333	4.66667	3.33333	3.46667	1.73333	2	6.73333	1.26667	4.6	5	3.49744	1.62426
-2	0.0666667	0.0666667	0.333333	0.6	0.0666667	0	0.133333	0	0.0666667	0	0	0.2	0	0.117949	0.174598		-2	2.53333	3.33333	2.26667	4.4	4.53333	2.8	5.26667	1.53333	1.46667	7.26667	1.26667	5.86667	5.06667	3.66154	1.89002
-1.75	0	0.133333	0.6	0.4	0.0666667	0	0.133333	0	0	0	0	0	0	0.102564	0.187805		-1.75	2.46667	3.26667	2	2.4	4.4	4.53333	4	1.66667	1.4	6.8	1.33333	5.66667	5.2	3.47179	1.77106
-1.5	0.133333	0.0666667	0.333333	0.466667	0.133333	0.133333	0.266667	0.0666667	0.0666667	0	0	0.133333	0	0.138462	0.140004		-1.5	2.4	3.73333	2	3.73333	5.13333	3.2	5.2	1.33333	1.33333	6.26667	1.13333	4.6	5.06667	3.47179	1.72035
-1.25	0.2	0.133333	0.666667	0.6	0	0	0.133333	0.0666667	0.133333	0	0.0666667	0.266667	0	0.174359	0.220334		-1.25	2.13333	4.06667	2.86667	4.73333	4.8	3.73333	4.53333	1.26667	1.4	4.93333	1.66667	5.2	5.8	3.62564	1.57352
-1	0	0.133333	0.533333	0.133333	0	0.133333	0.0666667	0	0.333333	0	0.0666667	0.0666667	0	0.112821	0.157256		-1	2.26667	3.53333	2.6	5.66667	5.26667	2.53333	3.73333	1.33333	1.73333	6.73333	1.46667	4.8	6.2	3.68205	1.87284
-0.75	0.133333	0.2	0.533333	0.533333	0.0666667	0	0.133333	0	0.0666667	0	0	0.266667	0	0.148718	0.190815		-0.75	1.73333	3.6	2	3.86667	5	2.93333	4.06667	1.73333	1.2	6.86667	1.86667	5.26667	4.53333	3.4359	1.70677
-0.5	0	0	0.4	0.4	0	0.133333	0.133333	0	0.133333	0	0	0.0666667	0	0.0974359	0.14559		-0.5	2.06667	4.86667	2.13333	3.4	3.86667	3.86667	5.26667	1	1.66667	5.6	1.8	4.2	6.26667	3.53846	1.68884
-0.25	0	0.2	0.4	0.266667	0.133333	0	0	0.0666667	0.2	0	0	0.266667	0.133333	0.128205	0.131829		-0.25	2.4	4.2	2.66667	4.86667	3.66667	4	4.13333	1.93333	2.26667	5.66667	1.66667	5.33333	6.06667	3.75897	1.47335
0	0	0.266667	0.466667	0.533333	0.133333	0	0.0666667	0	0	0	0	0.333333	0	0.138462	0.195243		0	2.2	4.86667	2.4	4.53333	4.8	1.33333	5.26667	1.26667	1.93333	7.2	1.46667	5.06667	5.46667	3.67692	1.96899
0.25	0.0666667	0.266667	0.6	0.333333	0.0666667	0	0	0	0.933333	0	0	0.266667	0	0.194872	0.288626		0.25	3.26667	6.06667	4.06667	3.4	7.2	3.73333	4.4	3.73333	6.4	8.6	2.26667	8.8	6.73333	5.28205	2.13666
0.5	0	0	0.133333	0	0.0666667	0	0.2	0.133333	0.0666667	0	0	0.0666667	0	0.0512821	0.067516		0.5	3	8.46667	3.4	0.866667	9.13333	2.4	6	6.46667	6.46667	9.66667	4.4	8.33333	6.26667	5.75897	2.77149
0.75	0	0	0	0	0	0	0.133333	0	0	0	0	0.133333	0	0.0205128	0.0500712		0.75	3	7.86667	3.8	0.4	4.4	2.26667	8.73333	3.93333	5.66667	5.86667	4.93333	4.6	4.73333	4.63077	2.18676
1	0	0	0	0	0	0.133333	0.0666667	0	0	0	0	0.0666667	0	0.0205128	0.0420283		1	5.33333	7.13333	3.4	0.333333	7.46667	3.06667	7.33333	2.4	3	5.26667	3.8	6.06667	4.33333	4.53333	2.14649
1.25	0	0	0	0	0.133333	0	0.266667	0	0	0	0	0.0666667	0.0666667	0.0410256	0.0795285		1.25	4.93333	6	2.2	0.8	7.73333	2.53333	7.33333	2.53333	2.66667	5.66667	3.6	6.33333	4.93333	4.40513	2.17178
1.5	0	0	0	0	0.266667	0.266667	0	0	0	0	0	0.0666667	0	0.0461538	0.0995717		1.5	4.33333	4.8	3.86667	0.6	9.4	3.46667	6.93333	2.33333	1.46667	5.66667	2.93333	5.33333	5.06667	4.32308	2.32822
1.75	0	0	0.0666667	0	0.2	0	0.0666667	0	0	0	0	0.0666667	0.0666667	0.0358974	0.0584705		1.75	4.73333	4.8	2.53333	1.6	9.8	3.73333	5.4	2.4	0.933333	8.66667	2.8	4.86667	5.66667	4.45641	2.59427
2	0	0	0	0.133333	0.266667	0	0.133333	0	0	0	0	0.0666667	0.0666667	0.0512821	0.0823446		2	4.4	4.26667	2.26667	6.93333	10.3333	3.2	3.86667	1.26667	1.53333	9.06667	2.8	5.53333	4.8	4.6359	2.75394
2.25	0	0	0.0666667	0.333333	0.4	0	0.0666667	0	0	0	0	0.0666667	0	0.0717949	0.134609		2.25	3.86667	4.06667	2.73333	9.8	8.53333	3.73333	5.53333	1.53333	0.933333	7.33333	2.2	4	4.8	4.54359	2.65955
2.5	0	0	0	0.533333	0.133333	0	0.0666667	0	0.0666667	0	0	0.0666667	0.133333	0.0769231	0.146176		2.5	3.4	4.26667	2.8	9.46667	8	2.66667	5	1.33333	0.933333	4.6	2.13333	5.73333	5.06667	4.26154	2.48573
2.75	0	0	0.0666667	0.333333	0	0	0	0	0.0666667	0	0	0.0666667	0	0.0410256	0.09245		2.75	3.86667	3.46667	2.46667	4.8	5.73333	2.93333	3.8	1.06667	1.66667	6.4	2.86667	4.53333	6	3.81538	1.64343
3	0	0.0666667	0.0666667	0.266667	0	0.133333	0	0	0.0666667	0	0	0.266667	0	0.0666667	0.0981307		3	3.06667	4.33333	2.73333	5.8	5.2	3.33333	4	1	1.2	6.8	2.46667	5.2	5.86667	3.92308	1.81635
3.25	0	0	0.133333	0.4	0	0	0.0666667	0	0	0	0	0.2	0	0.0615385	0.120066		3.25	2.86667	3.4	2.73333	6	6.13333	3.6	3.8	1.8	1.73333	7	2.33333	6.86667	5.8	4.15897	1.93401
3.5	0	0	0.133333	0.4	0.133333	0.133333	0.0666667	0	0.333333	0	0	0	0	0.0923077	0.134821		3.5	2.46667	3.13333	2.8	6.73333	4.73333	3.46667	3.86667	2.06667	2.46667	8.66667	1.6	6.13333	6	4.1641	2.13466
3.75	0	0	0.0666667	0.4	0.0666667	0	0	0	0.133333	0	0	0.0666667	0.0666667	0.0615385	0.110425		3.75	3.06667	3.46667	2.93333	4.53333	4.4	3.86667	4.06667	2.26667	1.93333	7.53333	2.2	4.46667	6.26667	3.92308	1.60828
4	0	0.0666667	0.333333	0.533333	0	0	0.0666667	0.0666667	0.133333	0	0	0.2	0.0666667	0.112821	0.159594		4	2.93333	3.4	2.6	3.53333	5.4	3.06667	4.06667	1.86667	1.86667	6.8	1.4	4.4	6.06667	3.64615	1.65873
4.25	0	0.266667	0.133333	0.4	0	0	0.266667	0	0.133333	0	0	0.133333	0	0.102564	0.135032		4.25	3.13333	4.13333	1.73333	3.8	4.53333	2.53333	4.26667	1.8	1.8	5.6	2.26667	4.93333	5.46667	3.53846	1.41276
4.5	0	0.0666667	0.2	0.133333	0	0	0.0666667	0	0.2	0	0	0.0666667	0	0.0564103	0.0762362		4.5	2.6	2.66667	2.73333	4.46667	5.33333	3.06667	3.86667	2	2.06667	7	1.53333	4.6	5.86667	3.67692	1.67174
4.75	0	0.0666667	0.133333	0.333333	0.0666667	0	0.133333	0	0.2	0	0	0.2	0	0.0871795	0.106752		4.75	2.6	2.86667	2.86667	6	6.26667	3.2	3.6	2.06667	1.33333	5.8	1.8	5.2	4.46667	3.69744	1.67986
5	0	0.133333	0.333333	0.466667	0.0666667	0	0.0666667	0.0666667	0.2	0	0	0.333333	0	0.128205	0.157437		5	2.93333	4.06667	2.6	2.73333	5.93333	4.8	5.4	1.53333	1.73333	6.66667	1.26667	5.86667	4.8	3.87179	1.843
5.25	0	0.2	0.266667	0.466667	0.0666667	0	0	0.0666667	0.0666667	0	0	0.2	0	0.102564	0.143024		5.25	2.53333	4.06667	1.26667	4.53333	6.06667	3.6	4.26667	1.4	1.2	6.86667	1.53333	4.66667	4.4	3.56923	1.85983
5.5	0.133333	0.0666667	0.4	0.333333	0	0	0.2	0	0.133333	0	0	0.0666667	0	0.102564	0.135032		5.5	2.4	2.66667	2.06667	6	4.8	3.33333	4.6	1.93333	1.86667	7.53333	1.73333	5	5.33333	3.78974	1.87456
5.75	0	0.0666667	0.466667	0.2	0.0666667	0	0	0.133333	0.133333	0	0	0.0666667	0	0.0871795	0.131613		5.75	2.53333	3.6	2.66667	2.8	5.26667	4.13333	3.93333	2.26667	1.8	6.26667	1.66667	4.73333	5.2	3.60513	1.45868
6	0	0.2	0.266667	0.466667	0	0.133333	0.0666667	0	0.133333	0	0	0.133333	0	0.107692	0.140207		6	2	4.4	2	3.33333	4.8	4.13333	3.66667	1.86667	1.2	7.06667	1	5.6	4.13333	3.47692	1.80716
6.25	0	0.0666667	0.466667	0.4	0	0	0.133333	0	0.0666667	0	0	0.2	0	0.102564	0.160128		6.25	2.8	3.73333	1.66667	2.93333	4.13333	4	4.26667	1.46667	1.93333	7	1.66667	5.13333	4.86667	3.50769	1.6381
6.5	0.0666667	0.0666667	0.4	0.333333	0	0	0.0666667	0	0	0	0	0.266667	0	0.0923077	0.142825		6.5	2.53333	3.46667	1.73333	3.8	4.6	4.53333	4.86667	1.93333	1.46667	7.46667	1.4	6.26667	5.8	3.8359	1.96857
6.75	0.2	0.133333	0.4	0.4	0	0.266667	0.0666667	0.0666667	0.133333	0	0	0.133333	0	0.138462	0.142625		6.75	2.4	3.13333	2.33333	3.86667	5.2	3.2	4.33333	1.93333	2.93333	7.4	1.53333	4.06667	5.8	3.70256	1.66947
7	0.0666667	0.133333	0.666667	0.466667	0	0	0.0666667	0	0	0	0	0.0666667	0	0.112821	0.209735		7	2.26667	3.8	1.66667	4.46667	4.73333	2.26667	4.06667	1.8	2.66667	6.13333	2.2	4.53333	6	3.58462	1.5466
7.25	0.0666667	0.2	0.0666667	0.666667	0	0	0.0666667	0	0	0	0	0.333333	0	0.107692	0.195388		7.25	2.93333	3.93333	2.33333	3.2	4.13333	4.8	4.2	1.53333	1.8	7.06667	1.4	4.4	5	3.59487	1.61692
7.5	0.0666667	0	0.666667	0.533333	0	0.133333	0.133333	0	0.266667	0	0	0.266667	0	0.158974	0.220334		7.5	2.06667	3.6	1.46667	4.13333	4.8	2.66667	4.86667	2.53333	2.46667	5.8	1.13333	3.93333	5.13333	3.43077	1.48713
7.75	0.0666667	0.4	0.266667	0.2	0	0	0.133333	0	0.0666667	0	0	0.266667	0	0.107692	0.134821		7.75	2.53333	3.93333	2.2	4.53333	4	3.2	5.26667	1.53333	1.4	6.53333	1.2	4.73333	5.53333	3.58462	1.72415
8	0.133333	0.0666667	0.466667	0.333333	0	0	0.0666667	0	0.2	0	0	0.133333	0	0.107692	0.14792		8	2.26667	2.46667	1.4	4.13333	5.86667	4.66667	4.8	1.53333	2	7.4	1.4	4.93333	5	3.68205	1.95072
8.25	0.133333	0.266667	0.6	0.2	0	0	0.0666667	0	0.133333	0	0	0.2	0	0.123077	0.171801		8.25	1.73333	3.33333	1.93333	2.8	5.93333	3.86667	5	1.4	1.8	6.53333	1.4	5.86667	5.26667	3.60513	1.91243
8.5	0	0.266667	0.333333	0.333333	0	0	0	0	0.133333	0	0	0.133333	0	0.0923077	0.134821		8.5	2.8	3.6	2.53333	5.8	5.4	4.53333	4.46667	1.26667	1.73333	7.93333	1.26667	5.33333	4.8	3.95897	1.98747
8.75	0	0	0.6	0.533333	0.133333	0	0	0.0666667	0	0	0.0666667	0.2	0	0.123077	0.207		8.75	2.13333	4.73333	2.46667	3.73333	5.13333	2.4	3.53333	2	0.666667	6.8	1.53333	4.6	5.13333	3.45128	1.7624
9	0.133333	0.2	0.533333	0.6	0.0666667	0	0.0666667	0	0.133333	0	0	0.2	0.133333	0.158974	0.195388		9	1.4	3.4	2	3.6	5.33333	4	4.2	1.86667	1.86667	7.06667	1.33333	5.6	5.13333	3.6	1.83666
9.25	0.266667	0.133333	0.4	0.4	0.0666667	0	0.2	0	0.0666667	0	0	0.133333	0	0.128205	0.147727		9.25	2.06667	4.66667	1.86667	3.13333	3.6	3.33333	4.46667	1.8	1.6	5.86667	1.6	5.26667	6.53333	3.52308	1.7131
9.5	0.0666667	0.133333	0.666667	0.266667	0	0	0.0666667	0	0.533333	0	0	0.133333	0	0.14359	0.219167		9.5	2.8	3.8	1.53333	4	4.66667	2.8	4	1	2.33333	6.4	1.26667	4.73333	5.06667	3.41538	1.62507
9.75	0.0666667	0.0666667	0.533333	0.2	0	0	0.133333	0	0.0666667	0	0	0.333333	0	0.107692	0.162249		9.75	1.73333	3.46667	2.13333	4	5.06667	2.66667	3.86667	1.86667	1	6.53333	1.4	5.93333	4.66667	3.41026	1.78488
10	0	0.2	0.333333	0.6	0.133333	0	0.2	0	0.0666667	0	0	0.2	0	0.133333	0.178471		10	1.53333	4.26667	1.8	4.73333	4.2	2.4	5.13333	1.13333	2.06667	6.46667	1.46667	3.6	5.4	3.4	1.76341

## Sheet: Fig 3G 3H 3I
Figure 3G - Sciatic Nerve Stim Response - All				Figure 3H - Sciatic Nerve Stim Response - Burst				Figure 3I - Sciatic Nerve Stim Response - Single
	Firing Rate (spikes/s)				Firing Rate (bursts/s)				Firing Rate (spikes/s)
	BL	NS			BL	NS			BL	NS
Unit2	2.785	4.14167		Unit2	0.138333	0.00833333		Unit2	2.46667	4.125
Unit3	4.28167	6.26667		Unit3	0.188333	0.0333333		Unit3	3.6	6.16667
Unit6	3.47333	3.425		Unit6	0.225	0.1		Unit6	2.89	3.19167
Unit8	4.42333	2.03333		Unit8	0.445	0.0666667		Unit8	3.4	1.84167
Unit12	5.27333	8.50833		Unit12	0.0433333	0.0166667		Unit12	5.13333	8.475
Unit13	3.57833	3.15		Unit13	0.265	0.05		Unit13	2.965	3.05
Unit16	2.12833	6.475		Unit16	0.0433333	0.1		Unit16	2.02667	6.25833
Unit18	0.64	3.16667		Unit18	0	0.0166667		Unit18	0.64	3.125
Unit20	2.56167	3.89167		Unit20	0.18	0.108333		Unit20	2.12167	3.55833
Unit24	1.13	7.30833		Unit24	0.0166667	0		Unit24	1.09333	7.30833
Unit25	1.11167	3.44167		Unit25	0.0116667	0		Unit25	1.085	3.44167
Unit27	6.02667	6.525		Unit27	0.271667	0.0916667		Unit27	5.30333	6.31667
Unit30	2.4	5.36667		Unit30	0	0.025		Unit30	2.4	5.30833

## Sheet: Fig 3M
Figure 3M - Firing Rate Distribution by Burst Rate (Pooled Units)
Firing Rate (spikes/s)
0	0.1	0.2	0.3	0.4	0.5	>=0.6
1.4	2	1.9	2.2	2.4	3.2	2.4
2.7	4.3	1.8	2	2.1	3	4.3
6.6	2.1	3	2.1	2.8	3.2	4.6
4.7	1.2	1.4	2.7	2.4	5.1	4
5.1	1.5	1.5	4.6	3.4	4	4
3.8	1.7	1.6	2.5	3.2	2.9	4.2
3.2	2.2	1.9	5.4	3.6	4.3	5.3
3.9	2	3.7	3.4	3.7	3	4.5
2.3	8.7	2.9	5.3	4.5	3.3	4.2
2.8	7.1	3.4	3.4	3	3.1	4.1
1.5	6.5	6.3	4.4	3	3.4	4.4
0.5	2.4	3.5	2.5	3.2	2.3	5.1
2.8	6.1	5.3	3.6	4	2.3	3.6
0.7	4.2	3.3	3.5	2.6	7.5	3.8
2.3	4.1	4.7	3.4	3.1	5.8	2.6
2.5	5.8	3.5	3.2	4.5	7.5	3.8
2.2	2.9	2.9	3.3	4.8	6	4.4
1.8	2.4	3	4.2	6.3	3.7	6.3
1.8	6.7	2	2.9	4.6	3.4	5.1
1.4	6.6	5.2	3.1	7.8	3.8	4
1.1	4.2	4.5	4.7	5.2	2	6.9
2.1	3.7	4.1	3.9	2.9	5.8	7.2
3.3	3	3.1	3.3	2.2	4.2	4.7
4.8	2.7	4.1	3.8	2.7	3.7	5.7
5.4	4.7	2.8	3.6	3.2	5.1	6.3
5	2.2	2.5	3.6	4	6.8	3.5
4.9	4.4	2.9	2.6	2.9	5.8	3.5
4.9	1.9	4.7	2.8	3	3.4	3.8
2.6	6.3	2.7	2.8	3.2	4.8	5.6
2.7	4	4	4.3	4.8	2.5	3.8
2.9	2.4	4.2	3.4	3	2	5.1
3.7	2.8	5.1	5.6	3.5	2.5	7
5.1	5.9	4	4.3	2.3	2.4	6.1
6	1.8	2.7	3.8	2.8	1.8	7
5.1	2.2	1.8	2	2.8	1.6	4.6
4	2.2	2.4	2.9	2.9	1.3	3.5
4.4	3.4	3.1	2.4	4.9	1.5	4.5
4.8	2.2	2.9	1.6	5	2	5.3
4.7	2.5	3.7	2	2.6	1.7	3.3
4.8	9.8	3.1	5	4.6	2	3.6
2.3	2.3	3.7	2.9	4.3	2.2	2.8
3	2.4	3.4	4.5	5.8	3	3.6
4.3	1.8	2.5	3.7	4	3.2	3.2
4	2.4	1	4.6	5.4	4.2	4.1
5.3	4.3	2	4.5	7.4	3	4.5
4.4	4.5	1.6	3.6	3	2.6	4.6
4.2	3.6	3.1	3	1.1	1.7	4.1
5.3	2.3	2.7	4.1	1.5	4	2.8
2.7	3.9	2.1	3.1	1.4	2	3.1
3.6	3.3	5.6	4	1.7	2.2	3
1.8	3.1	1.8	2.8	1.2	1.7	3.9
3.2	2.9	3.5	3	1	3.1	7.2
2.1	2.7	3.9	4.5	1.6		5.5
2.5	2.4	2.7	5	1.5		4.4
2.8	2.9	1.7	4.6	1.4		5.2
2.5	2.4	2.9	3.8	2.6		4.3
3.7	2.4	1.8	3.3	2		4.3
3.2	2.1	1.7	4	1.6		4.9
5.2	2.3	1.5	1.7	1.7		4.2
5	1.6	1.9	1.9	1.5		6.4
3.9	1.8	1.9	1.9	5.1		2.3
3.9	2.9	2.6	2	2.1		2.5
3.5	3.3	6	1.6	2.1		3
2.9	2.3	5.5	1	4.3		3.5
3.6	2	5.3	0.9	2.1		3.2
2.8	0.6	5.5	1.4			3.4
2.7	1.6	3.5	1			2.5
3.6	1.3	5.4	1.6			4.9
1.1	2.5	2.2	0.9			2.9
0.7	2.9	3	1.6			3.7
2	2.3	2.2	1.9			3.3
1.5	2.6	3.5	1.2			3.2
1.1	4	4.2	0.8			4.5
2.6	2.7	0.8	1.1			2.6
4.9	3.9	4.9	1.7			3
3.5	4.2	5.1	3.8			3.5
6.1	2.1	5.2	1.4			3.1
1.9	2.4	4.1	1.2			4
2.5	2.1	1.3	2.7			3.6
2	0.6	1	6.4			3.2
2.2	2.2	1	1.4			2.7
17.7	1.1	0.6	2.9			2.7
7.9	1	1.1	1.4			3.5
8.6	0.8	1.3				3.7
4.8	2	1.8				2.8
3.7	0.9	1.5				3.3
8.5	1.1	2.6				3.3
6.7	1.1	3.3				2.4
7	0.8	1.2				3.3
2.7	1					4.7
1.9	0.9					3.3
2.3	1					3.9
1.6	1.4					3
1.5	0.6					3.5
1.3	6.7					3.3
4.5	11.6					3.2
2.7	7					4.6
21	6					4.1
8.9	4.2					3.8
13.8	7.1					4.9
8.8	4.6					2
10.7	3.8					2
8.9	2.9					2.6
8.7	2.4					1.9
6	2.2					1.9
9.4	2.4					2.4
2.1	2.8					2.1
7.1	3.8					2.1
3.4	3.2					2.5
2.6	2.9					2.7
4.1	2.5					1.9
1.3	1.6					2.3
1.3	5.5					2.3
11.9	0.3					2.1
11.4	0.6					3
5.5	3.1					2.5
11.3	2.9					2.1
4.8	3.2					2.4
5.1	0.4					2.2
2.6	5.3					2.9
5	1.4					2.3
5.2	1.3					2.5
5.3	0.5
6.2	2.1
2	1.2
3.7	1.4
4.2	4
1.7	6.8
3.7	5.7
3.5	1.5
3.9	4.8
3
4
2.8
4.8
2.3
2.1
2.2
1.5
1.6
2
2.1
3.3
3.4
2
2.7
1.8
1.7
1.3
2.3
2.2
2.2
2.3
2.3
1.5
1.8
2
2.9
2.3
2
2.3
1.1
1.7
1.6
2.1
2.6
3
2.6
2.8
1.9
1.8
1.7
1.4
0.8
2.3
0.8
0.1
0.3
0.1
0.3
0
0.1
0.1
0.1
0.2
0.3
0.4
0.3
0.6
0.5
1.2
0.6
0.2
0.1
0
0.7
1.2
0.2
0.2
0.1
0.1
0.6
0.1
0.3
0.1
0.3
1.4
0.5
0.8
0.9
0.4
0.8
1.4
1.4
1.5
0.9
1.8
1
0.6
0.4
2.1
1.4
1.5
0.5
0.6
0.2
0.6
0.2
0.6
0.8
0.9
1.5
0.2
1.8
1.5
2
2.7
1
2.6
2.4
3.7
2.1
3.6
3.4
1.7
2.3
1.6
2
2.6
1.8
1.2
1.5
0.8
1.2
1.2
0.9
1
0.6
0.7
1.1
1
1.2
1.2
0.8
0.9
1.1
0.9
0.5
0.8
0.4
0.8
1
0.7
0.8
0.9
1.5
1.6
1.6
1.9
2.5
2
1.5
1.5
1.4
1.1
0.9
1.6
1.2
0.9
1.2
1
1.3
0.9
0.5
1.1
1.4
1.3
0.7
1
0.9
1.8
0.8
0.9
0.6
0.6
2
0.5
1
1.5
1.6
1.2
0.6
1.2
1.2
4.2
3.1
2.7
0.5
0.1
0
0.3
0
0.2
0.1
0.4
0.9
0.6
0.7
0.3
0.1
0.2
0.4
1
0.7
1
1.7
4.7
4.3
4.9
4.6
0.9
0.6
0.4
0
0.2
0.1
0.6
2
0.7
0.4
0.5
0.5
0.8
0.2
0.6
3.3
7.3
8.1
7
12.6
10.8
12.6
11
11.6
11
10.7
7.4
4.2
4
6.5
7.1
6.8
6.7
2.3
1.8
3.7
2.8
2.7
2.7
2.9
1.8
2.2
2.1
4.1
3.3
4
3.7
5
3.4
4.8
2.6
0.5
0.5
2.5
1.8
2.6
2
1.5
2.3
2
1.6
0.8
0.9
3.4
2.5
1
0.7
1.9
0.8
1.3
0.9
0.7
0
0
0
0
0
0
0
0
0
0
0.2
0.9
1.1
2.3
3.7
4
4.4
5.6
6.2
5.7
4.1
3.6
1.1
1.5
1.6
2
0.7
0.6
1.9
1.6
3.5
1.8
1.8
3
2.9
2.6
2.5
1.8
2
4.2
4.1
4.5
6.1
6
6.2
6.5
4.5
4.5
3.7
3.8
2
0
0.2
0.2
0.1
0.1
0.2
0.3
0.2
0.2
0.2
0.1
0.1
0.3
0.1
0.3
0.4
0
0
0
0.1
0.1
0.2
0.7
0.3
0
0.3
0.3
0.3
0.2
0.2
0.1
0
0.3
0.1
0
0.7
0.2
0.2
0.1
0.5
0.1
0.1
0.5
0.4
0
0.1
0.4
0.5
0.2
0.1
0.1
0.2
0.1
0.1
0.2
0
0.2
0
0.2
0.3
0.2
0.7
0.2
0.4
0.3
0.3
7.8
4.7
5.9
6.3
3.8
5.5
