# Supplementary material for: State-dependent activity dynamics of hypothalamic stress effector neurons
Source: eLife journal article supplement (doi:10.7554/elife.76832), 2022-06-30
Supplement: supp [file elife_poa_e76832_Figure_4_source_data_1.xlsx]

## Sheet: Fig 4B 4C
Figure 4B - Probability Burst by Preceding Silence														Figure 4C - Probability Burst by Proceeding Silence
	Prob. next ISI is < 6 ms														Prob. previous ISI is < 6 ms
Preceding silence (ms)	Unit2	Unit3	Unit6	Unit8	Unit13	Unit20	Unit27	Unit33	Unit35	Unit36	Mean	SD		Proceeding silence (ms)	Unit2	Unit3	Unit6	Unit8	Unit13	Unit20	Unit27	Unit33	Unit35	Unit36	Mean	SD
10	0.413793	0.466125	0.305699	0.236994	0.110429	0.474531	0.422619	0.255507	0.30563	0.149718	0.314104	0.128491		10	0.453202	0.577236	0.417098	0.250482	0.140673	0.509383	0.501984	0.271659	0.372654	0.2	0.369437	0.146964
20	0	0	0	0.0162602	0.0484848	0.0340909	0.00561798	0.1	0	0	0.0204454	0.0327088		20	0.227273	0.329412	0.194805	0.0404858	0.109091	0.229885	0.129213	0.111111	0.384615	0.191489	0.194738	0.104834
30	0	0	0	0.00917431	0.0277778	0	0	0.0645161	0.166667	0.016129	0.0284264	0.0526787		30	0.285714	0.142857	0.0657895	0.0229358	0.0694444	0.106383	0.045	0.0967742	0	0.016129	0.0851027	0.0831736
40	0	0	0	0.025974	0.04	0	0.00909091	0.0714286	0	0	0.0146494	0.0242975		40	0.175	0.0487805	0.0422535	0.0196078	0.04	0.190476	0.0227273	0.128571	0	0.0298507	0.0697267	0.0686177
50	0	0	0	0.00877193	0.0588235	0	0.00480769	0.112676		0.0181818	0.0225846	0.0387237		50	0.105263	0.0754717	0.0147059	0.0175439	0.0784314	0	0.00480769	0.0571429		0.0181818	0.0412831	0.0382952
60	0	0	0	0.032967	0.0784314	0	0.0104712	0.08		0	0.02243	0.0339485		60	0.0512821	0.0408163	0.0363636	0.021978	0.0588235	0	0.026178	0.1		0	0.0372713	0.0311134
70	0	0	0	0	0.0526316	0	0.00552486	0.0517241		0.02	0.0144312	0.0223653		70	0	0.056338	0.0212766	0.0405405	0.0263158	0.0416667	0.00552486	0.0862069		0	0.0308744	0.0286835
80	0	0	0.025641	0.0208333	0.108108	0	0	0.107143		0	0.0290806	0.045617		80	0	0.0204082	0.025641	0.0208333	0.162162	0.037037	0.0204082	0.0892857		0.0208333	0.0440677	0.0506472
90	0	0	0	0	0.185185	0	0	0.0645161		0	0.0277446	0.0627774		90	0	0.0117647	0.0512821	0.148936	0.0740741	0.0416667	0.00680272	0.0967742		0	0.0479223	0.0511321
100	0	0	0	0	0.0277778	0.04	0	0.0769231	0	0	0.0144701	0.026236		100	0.0357143	0.0126582	0	0.097561	0.0833333	0	0.0181818	0.134615	0	0	0.0382064	0.0491629
110	0.0217391	0	0	0	0.105263	0	0	0.108108		0	0.0261234	0.046231		110	0.0217391	0.0361446	0	0.0333333	0.157895	0	0.019802	0.108108		0	0.0418913	0.0548936
120	0	0	0.025641	0	0.142857	0	0.01	0.142857		0	0.0357061	0.0613386		120	0.0638298	0.0222222	0	0.2	0.0714286	0.0454545	0.01	0.285714		0	0.0776277	0.0995203
130	0	0	0	0	0.130435	0	0	0.0645161		0	0.0216612	0.0460335		130	0.0434783	0.0131579	0.0322581	0.0666667	0.0869565	0	0	0.193548		0	0.0484518	0.0626925
140	0	0	0	0	0	0	0	0.0434783		0	0.00483092	0.0144928		140	0.0178571	0.0133333	0	0.25	0.0434783	0	0.0140845	0.0869565		0	0.0473011	0.0810172
150	0	0	0	0	0.181818	0	0	0.047619		0	0.025493	0.0607005		150	0	0.0138889	0.0344828	0.28125	0.0909091	0.047619	0.0181818	0.0952381		0	0.0646189	0.0886257
160	0	0	0.04	0.0416667	0.148148	0	0.0142857	0		0	0.0271223	0.0485638		160	0.027027	0	0.04	0.166667	0.148148	0	0.0571429	0.25		0.125	0.0904427	0.0864779
170	0.0232558	0	0	0.0714286	0.117647	0	0	0		0.0714286	0.0315289	0.0442141		170	0.0697674	0	0.04	0.142857	0.0882353	0	0.0175439	0.24		0	0.0664893	0.0812261
180	0	0	0	0	0.030303	0	0.0410959	0.1		0.05	0.0245999	0.0347505		180	0	0	0	0.307692	0.030303	0.111111	0.0684932	0.5		0.05	0.118622	0.172659
190	0	0	0	0	0.0416667	0	0	0.12		0	0.017963	0.0406696		190	0	0.0222222	0	0.230769	0.0416667	0.0555556	0.0263158	0.2		0	0.0640588	0.0882691
200	0.037037	0	0.0909091	0.0357143	0	0	0.0392157	0.115385	0	0	0.0318261	0.0416789		200	0.0740741	0	0	0.357143	0	0.0625	0.0588235	0.461538	0	0.2	0.121408	0.165336
210	0	0	0	0	0	0	0.0526316	0.153846		0	0.022942	0.0520837		210	0	0.02	0.0714286	0.125	0.0740741	0	0.105263	0.307692		0.0909091	0.088263	0.0938883
220	0	0	0	0.133333	0.0689655	0	0.0277778	0.227273	0.25	0	0.0707349	0.0985586		220	0	0.0204082	0	0.4	0.0689655	0	0.111111	0.5	0	0.1	0.120048	0.180555
230	0	0	0	0.0588235	0.0769231	0	0	0.210526	0	0.166667	0.051294	0.0782913		230	0	0	0	0.176471	0.0769231	0.0555556	0	0.526316	0.25	0.0833333	0.11686	0.166679
240	0	0	0	0.2	0.0740741	0	0.0322581	0.142857		0.05	0.0554655	0.0722391		240	0	0	0.0588235	0.0666667	0.111111	0.0625	0.0322581	0.357143		0.2	0.0987225	0.114582
250	0	0	0	0.166667	0.1	0	0.04	0.16	0	0.133333	0.06	0.0720768		250	0.0555556	0.027027	0	0.166667	0.05	0	0.16	0.2	0.5	0.266667	0.142592	0.15545
260	0	0	0	0.16	0.0384615	0	0.133333	0.230769		0.181818	0.0827091	0.0932752		260	0.0625	0	0.0714286	0.24	0	0	0.166667	0.538462		0	0.119895	0.178519
270	0.111111	0	0	0.333333	0	0	0.0909091	0.25	0	0.214286	0.0999639	0.124816		270	0.111111	0	0	0.0555556	0	0	0.0588235	0.333333	0.5	0.214286	0.127311	0.171218
280	0	0.037037	0	0.285714	0.0952381	0	0.0740741	0.238095	0	0.0769231	0.0807082	0.102756		280	0	0.0740741	0	0.428571	0.1	0	0.037037	0.52381	0	0.230769	0.139426	0.192575
290	0	0	0.111111	0.375	0	0	0.0833333	0.133333		0.142857	0.0939594	0.121781		290	0.0555556	0	0.0740741	0.25	0.08	0	0	0.466667		0	0.102922	0.15808
300	0	0	0.0769231	0.238095	0.08	0	0	0.1	0	0	0.0495018	0.077819		300	0	0	0	0.0952381	0.04	0.142857	0.0434783	0.3	0.333333	0	0.0954907	0.126005
310	0	0	0	0.315789	0.0588235	0	0.1	0.25		0	0.0805126	0.121111		310	0	0	0	0.210526	0.117647	0	0.05	0.55		0	0.10313	0.182838
320	0	0	0	0.277778	0.0625	0	0.0909091	0.333333		0.285714	0.116693	0.141209		320	0	0	0	0.111111	0	0	0.0909091	0.466667		0.285714	0.106045	0.165383
330	0.0909091	0	0.0833333	0.222222	0.0714286	0	0.047619	0.230769		0.272727	0.113223	0.102604		330	0.0909091	0	0.25	0.222222	0.107143	0.142857	0.047619	0.307692		0.272727	0.16013	0.107577
340	0	0.0526316	0	0.227273	0.0555556	0.111111	0.047619	0.666667	0.2	0.1	0.146086	0.19809		340	0.125	0	0.0555556	0.227273	0.0555556	0	0.0952381	0.666667	0.2	0.4	0.182529	0.209178
350	0	0	0	0.181818	0.0454545	0	0	0.230769	0.2	0.25	0.0908042	0.10976		350	0	0	0.181818	0.136364	0.0454545	0.25	0.0588235	0.461538	0	0.25	0.1384	0.150426
360	0	0	0.166667	0.285714	0.0869565	0	0.111111	0	0	0.666667	0.131712	0.210893		360	0	0	0.166667	0	0.173913	0	0.0555556	0.363636	0.333333	0.333333	0.142644	0.153511
370	0	0	0.142857	0.294118	0.0666667	0	0	0.142857		0.5	0.127389	0.171652		370	0	0	0	0.176471	0.133333	0.166667	0	0.714286		0.3	0.16564	0.231833
380	0	0	0.142857	0.52381	0	0	0	0.222222		0.222222	0.123457	0.179017		380	0	0	0	0.333333	0.153846	0	0	0.333333		0.222222	0.115859	0.147675
390	0	0	0.0555556	0.222222	0	0.2	0	0.277778	0	0.166667	0.0922222	0.111733		390	0	0.0588235	0.111111	0.277778	0.0909091	0.4	0	0.611111	0.5	0.166667	0.22164	0.216339
400	0	0	0	0.333333	0.0909091	0	0	0.2		0	0.0693603	0.120456		400	0	0	0.142857	0.238095	0.0909091	0.1	0.0833333	0		0.166667	0.0913179	0.0829409
410	0.25	0	0.222222	0.166667	0.105263	0.1	0.230769	0.111111		0.5	0.187337	0.141635		410	0	0	0	0.416667	0.105263	0.2	0.230769	0.444444		0.25	0.183016	0.171946
420	0.0833333	0.0833333	0.166667	0.421053	0.0588235	0.1	0.0666667	0.5		0.333333	0.201468	0.170538		420	0	0	0	0.210526	0	0	0.0666667	0.666667		0.166667	0.123392	0.219077
430	0	0	0.363636	0.461538	0.15	0	0.153846	0.375	0.2	0.2	0.190402	0.166504		430	0.25	0	0	0.0769231	0.1	0	0.0769231	0.5	0.4	0	0.140385	0.181737
440	0	0.0769231	0.125	0.2	0.133333	0.111111	0.2	0.625		0.375	0.205152	0.188457		440	0	0	0.125	0.2	0.0666667	0.111111	0	0.625		0	0.125309	0.200537
450	0	0	0.111111	0.421053	0	0	0		0	0.4	0.103574	0.177863		450	0	0	0	0.157895	0.0909091	0.2	0.166667		0.8	0.2	0.179497	0.24774
460	0	0	0.142857	0.454545	0.125	0	0.111111	0		0.2	0.114835	0.148453		460	0.125	0	0	0.272727	0.1875	0	0	0.4		0.4	0.153914	0.170277
470	0	0.142857	0.111111	0	0.0769231	0.125	0	0		0.333333	0.0876916	0.109658		470	0	0	0.111111	0.545455	0	0	0	0.25		0.333333	0.137767	0.197693
480	0.5	0.333333	0.1	0.5	0	0.111111	0.111111	0.333333		0.714286	0.300353	0.23854		480	0.25	0	0	0.166667	0	0.111111	0	0.333333		0.285714	0.127425	0.13658
490	0.333333	0	0.111111	0.375	0.15	0.166667	0	0.5		0.6	0.248457	0.214704		490	0	0	0.0555556	0.3125	0.15	0	0	0.333333		0.4	0.139043	0.165966
500	0.2	0.111111	0.222222	0.214286	0.0909091	0	0.25		0.5	0	0.176503	0.15331		500	0.2	0.111111	0	0.142857	0.0909091	0	0		0.25	0.4	0.132764	0.134574
1000	0.182857	0.260204	0.220447	0.415966	0.180758	0.174194	0.34	0.561798	0.472222	0.378788	0.318723	0.136475		1000	0.0857143	0.00510204	0.0543131	0.231092	0.0932945	0.0961538	0.07	0.376404	0.444444	0.294416	0.175094	0.151251
1500	0.240506	0.537313	0.2625	0.186441	0.142857	0.258824	0.490909	0.725926	0.648649	0.447761	0.394169	0.203612		1500	0.0384615	0.0298507	0.0625	0.220339	0.2	0.129412	0.0545455	0.244444	0.378378	0.283582	0.164151	0.119459
2000	0.314286	0.7	0.259259	0.0909091	0	0.38	0.789474	0.730769	0.690141	0.415094	0.436993	0.279864		2000	0.0857143	0.05	0.037037	0.0909091	0	0.16	0	0.269231	0.471429	0.396226	0.156055	0.167756
2500	0.173913	0.375	0.25	0.0625		0.578947	0.833333	0.692308	0.625	0.3	0.432333	0.260913		2500	0.0434783	0	0	0.125		0.0526316	0.166667	0.307692	0.5	0.5	0.188385	0.20104

## Sheet: Fig 4D 4E
Figure 4D - Preceeding Silence by Event Length						Figure 4E - Proceeding Silence by Event Length
	Preceding Silence (s)						Proceeding Silence (s)
	Single	2	3	>=4			Single	2	3	>=4
Unit2	0.3638	0.8851	1.173	1.212		Unit2	0.3937	0.4436	0.6091	0.3522
Unit3	0.229	0.7298	0.9677	1.059		Unit3	0.2732	0.05796	0.1342	0.203
Unit6	0.2973	0.6667	0.7828	0.8938		Unit6	0.3278	0.5022	0.3822	0.3595
Unit8	0.2301	0.5114	0.5038	0.5839		Unit8	0.2421	0.4416	0.4089	0.4799
Unit13	0.3	0.4515	0.4384	0.339		Unit13	0.3002	0.4092	0.5091	0.3987
Unit20	0.3913	0.8653	0.9562	1.666		Unit20	0.4475	0.8673	0.6634	0.6831
Unit27	0.1622	0.6837	0.6863	0.8534		Unit27	0.1814	0.4462	0.2971	0.2493
Unit33	0.2401	0.7254	0.9459	1.06		Unit33	0.3342	0.4818	0.4852	0.3607
Unit35	0.744	1.569	1.578	1.715		Unit35	0.8334	1.368	1.296	1.581
Unit36	0.3173	0.9287	0.9545	0.9841		Unit36	0.3257	0.8804	0.9052	0.4155
Mean	0.32751	0.80166	0.89866	1.03662		Mean	0.36592	0.589826	0.56904	0.50829
SD	0.161515	0.310185	0.329388	0.426416		SD	0.180227	0.35991	0.331025	0.398783
