# Supplementary material for: State-dependent activity dynamics of hypothalamic stress effector neurons
Source: eLife journal article supplement (doi:10.7554/elife.76832), 2022-06-30
Supplement: supp [file elife_poa_e76832_Figure_6_source_data_1.xlsx]

## Sheet: Fig 6E
Figure 6E - Correlation of Ex Vivo, and Shuffled spike trains to In Silico Reference
	Correlation Coeff.
	Shuffled	Ex Vivo
E1	0.00238333	0.47041
E2	-0.0011602	0.311667
E3	-0.000647	0.178976
E4	-0.00103667	0.202113
E5	0.00133423	0.432645

## Sheet: Fig 6H
Figure 6H - Stimulus-Dependent ISI Distributions (<30 ms)
Network Clamp ISIs (ms)							Step ISIs (ms)
H1	H2	H3	H4	H5	H6	H7	H8	H9	H10	H11	H12	H13	H14	H15	H16	H17
4.7	7	18.3	10.2	17	5.4		29.05	29.55	29.05	29.5	23.5	26.35	26	29.3	26.75	26.5
5.6	8.1	4.4	27.5	16.3	9.3		28.65	27.65	25.4	28.65	20.9	28.4	22.75	24.3	19.7	28.75
9.4	4.6	5.7	20.3	7.1	27.5		1.25	26.75	28.25	29.65	26.65	23.4	24.15	28.85	22.95	22.1
12	5.9	17.1	24.5	23.6	20.1		20.9	27		26.35	29.55	26.95	20.3	21.6	25.2	24.15
4.7	26.3	19.3	28	22.9	24.3		25.95	28.95		25.05	16.65	29.95	22.3	26.75	30	28.55
5.1	7.4	4.5	7.6	27.5	7.7		29.7	23.6		28.05	20.65	27.35	27.45	18.3	17.75	19.05
11.8	13.8	5.3	19	5.6	19.1		28.5	26.6		28.15	23.95	29.8	16.7	23.1	20.35	21.45
8.1	22.8	7.8	8.8	8.6	9		29.35	22.5		23.85	28.9	22.65	21.3	25.6	24.6	24.9
17.7	5.7	5.8	10.2	18.9	18.5		17.3	24.15		23.75	14.75	23.15	25.6	18.2	28.4	24.95
6.8	5.8	13.6	18.2	27.3	7		17.8	20.35		25.75	19.55	23.8	26.3	20.7	29.75	27.45
5.3	10.9	25.3	6.8	20.4	26.5		23.3	21.6		27.65	22	23.3	16.55	23.95	29.8	29.75
7.8	8.4	26.8	10.1	21.4	12.4		16.55	19.5		22.15	25.7	25.3	19.4	29.65	29.6	15.9
6.2	7.6	8.6	26.2	5.2	20.6		17.95	22.35		24.25	27.9	26.1	22.75	18.5	28.65	18.1
5.6	9.7	7	11.7	28.5	7.9		17.3	20.55		26.7	27	28	25.35	18.25	17.55	20.9
8.2	16.1	12	20.4	7.8	6.3		18.65	21.2		24.45	19	27.05	28.3	24	19.35	24.45
16.5	4.5	6.2	7.9	19.1	5.4		18.75			21.05	15.95	29.4	29.75	24.95	22.95	24.9
12.4	16.8	18.2	5.8	29.9	10.5		14			24.75	22.2	25.4	15.25	14.9	24.85	27.7
5.4	11.8	10.2	15.5	25.3	25.5		15			27	23.6	27.75	18.4	18.3	27.15	28.65
21.9	6.1	25.9	9	26.6	14.1		14.05			21.15	25.25	21.75	22.5	20.9	27.95	29.85
9.5	6.4	11.5	16.5	8.6	24.6		14.65			24	25.55	21.7	28.65	14.25	26.7	29.95
15.1	5.2	20.5	13.3	19.6	18.9		13.25			19.05	26.05	23.25	27.25	16.6	26.4	15.45
6.4	5	7.5	19.3	7.4	27.6		14.85			22.05	27.1	22.7	29.25	20.5	28.1	17.85
7.8	5.1	5.9	5.4	11.5	19.4		12.5			18	28.95	23.5	29.05	14	29.5	17.95
13.9	5.9	6	27.1	6.9	21.8		12.9				29.35	25.6	29.9	15.65	27.75	23.25
6.5	6.7	3.8	19.5	10.4	20.2		12.1				24.5	24.7	14.45	19.1	29.7	22.7
6.5	4.6	7	15.4	22.5	13.8		12.45				16.1	24	18.7	12.6	28.75	26.6
4.6	11.6	4.6	14.1	11.6	15						18.95	26.2	22.15	17	25.35	28.9
5.5	9.9	20.9	14.9	20.5	19.6						21.3	24.55	22.9	18.25	13.45	28.8
7.4	7.5	13	19.3	27.4	6.5						22.35	25.15	27.5		16	28.85
16.3	5.4	5.6	16.8	23.2	28.2						23.65	26.15	28.7		20.35	27.75
6.2	4.9	5.2	14.6	7.6	12.1						27.1	28	27.5		21.9	28.5
5.6	22.2	22.4	8.8	15.5	10.3						25.6	27.45	27.4		23.3	29.2
11.4	10.4	10	6.5	5.4	6						26.8	28.15	28.6		24.2	29.7
6.4	15.3	6.5	20.2	5.5	20.9						29.75	27.65			25.75	14.15
7.3	6.1	8.2	28.3	10.4	9.3						28.55				25.7	15.05
24.6	8.5	14.7	10.7	5.3	28.4						29.95				25.25	18
18.8	14	18.5	6.8	21	11.4						21.35				25.9	19.55
4.9	7.1	5.5	29	13.1	6.7						14.8				27.15	21.55
8.1	5.2	10.1	7.6	18.3	29.2						17.7				26.05	13.75
20.5	7.3	6.5	24.7	23.7	7.5						20.6				25.6	15.3
0	8.1	6.7	19.1	19.5	25.4						25.1				27.35	17.7
4.6	4.3	4.6	25.2	5.6	19.5						26.5				27.6	17.55
5.4	5.4	5.5	7.4	6	25.5						23.1				26.9	27.75
20	5.2	7.8	17.8	24.4	25.6						26.15				28.45	11.7
5.7	7.6	18.3	10.8	22.3	10						27.85				29.4	13.5
6.1	17.7	7.1	11.6	29.7	29.7						27.05				27.8	14.35
13.3	6.5	29.8	22.1	13.8	13.4						28.15				26.5	19.7
17.7	5.7	5.7	0	23.9	22.1						29.65				28.2	20.9
18.1	11.7	27.8	17.9	20.5	0						22.15				12.4	12.55
5.8	6.3	11.1	9.9	20.9	11.3						14.85				15.3	13.4
6	6.7	6.4	27.2	6.7	27.3						16.4				19.8	16.55
10.5	7.4	28.8	20.3	7.7	20.2						20.8				20.6
7.9	28.4	7.3	24.8	14.1	24.6										21.5
16.7	23.5	24.9	7.3	16.4	29.1										23.4
5.4	5.2	18.6	19	6.1	7.8										23.65
22	12.2	24.9	8.8	12.1	19										23.8
9.3	5.2	6.6	10.3	29.1	8.9										25.75
15.7	11.4	18.5	18.1	12.1	20.3										24.5
6.6	12	10.1	6.9	27.5	18.5										24.8
7.8	4.8	10.2	10.2	5.6	7.1										25
14	10.4	12.7	22.9	15.7	10.7										25.4
6.4	6.7	21.8	11.8	9.6	27										26.3
6.3	20	17.5	20.5	5.7	12.6										24.95
4.7	7.4	29.8	8.1	20.4	20.5										26.4
5.6	0	0	5.8	7.3	7.8										27.1
7.3	6.5	7	5.4	6.3	6										26.9
16.4	4.2	23.6	10.6	27.6	5.5										27.2
6.2	5.5	5.6	9.1	11.4	10.3										29.55
5.5	5.5	5.2	16.4	6.6	9										23.8
11.2	25.8	3.9	13.6	5.9	16.5										27.95
6.3	19.7	27.4	5.8	28.7	16.4										27.3
7.2	4.5	20.6	27.4	7.5	5.6										27.85
24.4	5	21	19.2	24.7	27.9										27.15
22.5	5.7	5.3	15	19	20										25.65
5.1	11.3	25	22.5	22.1	14.8										29.05
9	8.1	7.7	14.2	25.2	25.5										10.8
16.9	7.2	5.9	15.1	6.9	14.1										13.7
0	6.6	13.7	19.5	18.5	15.1										16.8
4.6	12.7	24.9	6.3	5.9	19.9										19.75
5.5	4.5	26.9	11	29.4	28.4										20.8
20	17.2	9.3	28.2	13.4	11.7										22.45
4.3	6.2	19.9	12.2	7.3	10.8										23.1
6.2	5.5	8.2	6.2	21.9	20.4										21.4
17.9	4.4	6.8	20.8	16.7	9.1										22.35
17.7	5.1	10.1	28.3	29.6	6.5										22.75
18	6.1	26	11.8	16.3	11.9										23.55
5.6	5.9	11.6	11.3	0	6.7										22.9
8.2	4.3	20.4	29	23.4	29.4										23.95
6.3	5.7	27.2	7.5	5.3	7.5										24.85
5.7	15.3	7.9	25	8.9	24.9										25.9
8.2	7.4	5.8	19.3	27.4	19.3										24.25
16.6	5.5	5.9	25.3	20.2	22.6										25.7
5.4	10	10.8	7.3	24.6	25.4										25.25
21.9	22.4	7	18.2	6	9.9										25.75
9.6	10.4	5.8	28.7	28.1	29.4										23.95
15.1	15.4	15.8	13.3	7.5	12.8										25.2
13.6	6	13.8	22.2	19	22.1										28.15
6.5	8.3	12.2	17.4	24.9	18.4										27.1
9	14	19.4	0	8.7	0										25.25
15	7.1	20.2	16.8	19.3	9.8										25.9
6.7	4.9	24.4	10.1	7	27.3										24.9
6.3	7.4	19.8	27.3	12.1	20.1										26.95
4.7	8.2	5.6	20.5	6.6	24.7										26.45
5.5	4.3	6.7	24.7	10.4	29.5										10.95
7.7	5.7	12.2	7.5	22.5	8										13.7
16.3	7.6	23.9	19	11.6	19										16.25
6.6	17.9	23.4	24.9	20.4	8.9										19.3
5.8	6.6	28.7	9.1	7.6	20.5										21.9
11.4	5.7	15.8	9.9	17	18										21.45
6.4	11.6	22.3	17.8	5.5	6.9										23.35
7.3	7.3	20.5	6.9	5.7	26.8										23.05
24.5	6.2	21.6	10.1	9.8	20.8										22.9
4.8	8.1	14.4	26.3	5.9	7.8										24.05
22.8	7.4	16.5	11.7	21.1	6										24.25
5.1	6.9	24.2	20.4	13.3	5.4										24.5
21	29.3	7	8.2	18.6	10.5										25.85
0	23.6	11.1	5.4	23.8	27										24.5
4.5	11.9	28.4	9.1	19.7	16.7										23.8
5.6	5.2	13.2	16.6	5.5	5.5										27.35
6.3	12.3	11	14.3	6.3	27.4										25.3
20.1	11.5	15.5	5.9	24.3	20										25.35
5.6	4.8	12	27.5	22.5	14.7										25.35
9.8	10.4	23.7	19.6	29	20.7										24.8
14.4	6.4	17.9	15	14.9	13.9										25.8
17.8	21.2	10.5	14.2	24.2	15										25.7
18.7	7.2	5.6	15.5	20.5	19.9										25.5
5.8	0	9.4	16.1	20.9	12.4										25.45
7.9	6.7	13	6.1	6.8	20.9										25.2
6.4	4.5	6.9	11.2	7.8	6.7										25.5
5.5	5.2	28.1	8.3	14.3	29.2										26.15
8.3	26.5	12.3	7	16.5	7.4										25.9
16.6	19.5	6.5	6	6.2	24.9										10.4
5.5	4.6	29.1	20.5	11.5	19.5										12.65
21.1	5.3	7.2	6.6	29	25.6										15.8
9.1	6.1	25.3	27.9	12.2	25.5										18.7
6.3	11.3	24.3	10.5	28	10										20.9
7.8	8.1	19.6	6.7	10.5	29.6										23.35
14.1	7.3	21.7	29	17.6	12.7										23.1
14.6	12.5	6.2	7.5	6.1	21.9										21.7
11.8	14.1	25.3	24.9	9.3	0										27.5
4.7	6	8	19.2	12.3	10.8										27.4
5.5	6	18.8	24.7	8.9	15.5										26.2
7.5	5	21.5	25.1	6.4	24.9										28.1
16.2	4.2	9.6	10.2	28.2	7.9										29.4
6.3	5.2	28.7	21.9	11.6	18.9										26.7
5.5	5.8	13.7	9.9	6.9	9										27.25
11.4	5.7	7.2	27.2	6	18.4										27.1
6.3	4.5	16.2	20.1	26.4	6.9										28.2
7.3	20.8	17.9	24.7	10.1	20.6										10.2
24.5	11.5	29.8	29.3	25	7.8										12.7
4.8	5.2	0	7.6	24.2	5.8										15.5
22.3	5.4	17.6	18.8	19.4	15.5										18.95
5	4.9	16.3	25.7	22	9.1										19.45
9.7	6.5	23.8	10.6	5.3	16.7										22.15
16.9	17.7	10.7	17.9	25.7	16.6
	13.2	3.5	6.8	7.1	27.8
	15.4	19.6	10	18.6	21.8
	5.9	27.6	26.1	9.9	14.8
	8.4	20.5	11.9	22.7	13.9
	6.8	26.7	20.4	7.9	14.9
	11.3	26.9	7.9	13.4	19.6
	7.2	21.7	5.7	22.9	12.2
	4.8	4.7	16	17.1	11.9
	7.4	25	25.6	29.7	22.2
	8.2	8.4	13.4	23.6	11.9
	4.3	5.9	19.2	0	7
	7	13.8	27.4	17.2	29.3
	5.6	24.7	19.8	17.1	25.6
	7.2	26.1	13.7	23.1	19.6
	18.3	8.7	21.9	27.8	25.4
	6.2	10.3	14.3	5.6	25.5
	5.6	17.6	15.1	9.2	10
	11.9	6.7	19.3	19.2	12.7
	6.9	10.3	6.1	27.6	22.2
	6.2	22.7	11.3	20.2
	6.6	11.7	11.8	24.7
	7.5	20.6	11.1	6.5
	7.3	7.7	12.8	28.6
	29	5.3	20.5	7.8
	23.9	5.4	6.5	19.1
	5.3	10.7	11.6	25.1
	16.3	5.6	10	26.8
	5.3	6	29	8.6
	22.9	15.5	7.5	20
	5.4	13.1	25.4	18.1
	10.6	24.5	19.1	6.9
	6.6	19.4	24.9	10.5
	20.8	5.5	7.3	22.3
	7.9	6.2	17.9	11.7
	0	24.6	10.7	17.2
	7.1	22.6	12.8	29.8
	4.4	29.1	22	24
	5.2	14.9	29.8	7.8
	20.3	25.2		27.8
	23.3	20.6		5.6
	5.9	12.1		5.8
	6.5	21.8		10.1
	18.1	14.4		6.1
	8	15.2		21.3
	12.8	11.6		13.3
	14.3	13.5		19.4
	5.2	26.6		24.4
	19.5	6.3		19.5
	6.8	11.6		5.6
	11.2	28.3		6.3
	5.3	13.3		24.1
	5.4	10		22.8
	10.1	5.2		28.9
	5.2	7.7		15.3
	20.2	16.7		24.5
	11.9	5.2		20.7
	5.9	11.4		21
	11	6.6		7.1
	26.6	29.3		7.7
	19.1	7.3		13.9
	15.2	24.9		16.1
	15.8	17.2		26.2
	6.4	23.3		6.1
	8.5	9.8		12.1
	13.8	9.2		10.4
	5.8	6.9		29.1
	14.7	20.7		12.3
	8.7	0		5.9
	5	8.3		15.8
	6.1	5.4		11.2
	7.6	26.4		23.6
	18.9	19.1		9.4
	6.7	23.7		5.8
	6	5.8		9
	12.1	6.4		12.6
	6.5	18.7		9.1
	27.8	7		6.5
	7.4	12.3		28.1
	24.1	5.7		11.9
	17.8	12.8		27.2
	23.3	5.8		6.9
	12.3	6.1		6.1
	11.7	7		26.1
	15.4	6		10.6
	11.5	16.3		25
	20.9	12.3		24.3
		5.3		19.5
		5.4		21.7
		21.5		5.3
		10.2		25.2
		6.2		7
		8.2		18.9
		14.4		10
		11.5		21.4
		4.9		9.2
		5.5		29.8
		7.6		13.5
		18		7.2
		7		16.2
		5.5		17.6
		11.4		29.7
		6.1		17.9
		28.1		23.4
		7.2		0
		24.5		17.6
		17.6		16
		4.8		7.8
		23.1		23.7
		10.1		24.2
		8.6		27.6
		21.4		5.5
				5.9
				2.9
				19.7
				27.8
				20.3
				27.8
				26.3
				21.7
				4.8
				28.7
				8
				19.2
				24.8
				27.5
				8.7
				19.8
				18.2
				7.1
				10.5
				22.4
				11.9
				17.5
				29.4
				24.3
				7.9
				17.4
				5.7
				5.5
				10.5
				6.4
				6
				15.6
				13.3
				18.9
				19.9
				24.3
				19.5
				5.5
				6.3
				11.9
				24.1
				22.7
				28.9
				15.1
				24.7
				20.8
				21.4
				6.9
				7.9
				14.3
				16.2
				26.5
				6.1
				11.7
				10.8
				29.2
				12.3
				5.4
				15.6
				11.7
				23.6
				10.5
				5.7
				9.1
				12.7
				9
				6.2
				28.2
				11.7
				27.8
				7
				6.1
				26.4
				10.4
				24.8
				23.7
				19.8
				21.6
				5.4
				25.3
				7.2
				18.8
				9.7
				20.6
				10.1
				29.4
				13.6
				8.3
				7.2
				16.1
				17.4
				29.7
				20.2

## Sheet: Fig 6K
Figure 6K - Shortest ISI Triggered by Variable Current Lengths
	ISI (ms)
Current Length (ms)	K1	K2	K3	K4	K5	K6	K7	K8	K9	Mean	SD
400	4.9	6.2	5.16667	5.26667	11.65	5.4	19.5	5.46667	3.63333	7.46481	5.04466
300	5.2	10.4667	5.6	5.56667	4.95	4	13.6667	6.3	3.7	6.60556	3.29581
200	12.0333	6.3	5.53333	20.4	14.1	5.9	14.5333	6.3	3.83333	9.88148	5.60912
100	18.3333	25	14.5333	19.3333	2.93333	19.9333	2.83333	27.3	8.63333	15.4259	8.93216

## Sheet: Fig 6N
Figure 6N - Cell-Dependent ISI Distributions
ISI (ms)
Parvo (n=7)							Magno (n=6)
N1	N2	N3	N4	N5	N6	N7	N8	N9	N10	N11	N12	N13
313.4	578.8	512.6	214.3	150.1	214.9	238.7	19422.7	869.7	870.9	1743.7	871.7	956.5
6.5	205	163.5	314.1	17	314.4	494	1913.9	11738.4	11736.9	875.9	2413.1	789
156.6	298.7	75.2001	163	16.3	163	221.9	40001.5	8728.6	8728.9	2406	1206.7	10.0999
75.5	15	129.8	76.2	181.5	82.2	231.1	40000.1	8395.9	10560.7	1225.5	4373	56.1
129.3	162.4	361	127.9	213.2	122.3	560.4	40000.3	10271.5	29439.6	4353.2	2263.9	64.3
347.3	74.8001	166.5	104.1	56	348.5	4.7		12604.3	8395.6	2265.5	1473.6	726.4
17.9998	130.2	58.7999	261.5	45.5	179.1	5.6		8728.5	11137.2	1472.1	1764.2	22.4002
161.9	346.9	227.3	162	7.1	59.5	55.8		18667.5	11737.9	16.8001	905	2404.9
59.4	18.7001	373.7	59.6	155.3	231.2	62.4		11829.1	8728.8	1747.8		166.9
568.1	160.9	190.7	227.5	52.7	336.6	726.8		9503.41	2449.9	910.6		1039.7
33	59.6999	10.5998	340.6	23.6	33.3	9.4		18666.8	37550.2			20.2998
191.2	187.6	55.3001	33.2	128	190.9	12		866.797	2449.3			594.9
4.49995	43.5001	58.2	144.1	103.5	5.4	2404.6		11737.5	270.813			605.401
5.6001	370.2	254.4	47.1	226.9	9.3	4.7		8728.8	2214.39			273.6
55.4	142.5	232.7	10.2	31.9	51.3	5.1			3460.91			1481
58.1999	48.5	217.9	55.4	143.1	62.3	159.9						1396.9
167.4	9.60015	27.2	58.8	22.9	249.8	666.6						776.399
86.7999	55.6999	20.5	167.5	59	190.6	36.9						742.5
191	57.8	254.7	86	123	209.9	336.7						745.2
209	167.9	2153.3	190.4	63.2	50	11.8						1474.6
50.9001	86.9001	165.7	41.7	41.5	27.5	8.1						1763.7
27.0001	191.7	660.5	168	105.7	20.1	243.1						23.5998
19.8998	208.5	43.4998	50.3	27.5	254.3	348.9						885.801
255.1	51.6999	331	27.5	157.6	188.4	604.7
188.5	25.8001	25.7996	20.3	49.8	455.3	276.6
217.8	20	235.1	254.5	33	110.8	1477.8
237.1	254.8	356.8	188.3	119.5	231.3	17.7
110.8	190.4	134.4	455	71.5	561.6	1383.7
1115.9	215.9	470	111.1	5.6	323.2	6.8
77.5	237.8	270.2	967.7	8.6	77.3	523.6
206.1	112.2	308.6	148.3	51.5	148.8	242.1
5.6001	1114.2	1167.2	77.3	57.5	33.5	267.5
56.9	78.3999	13.5997	148.9	157.9	24.3	290.2
75.7997	148.6	758	33	96.8	138.5	188.3
27.6001	52.5001	445.3	24.5	190.5	240.6	55.3
213.4	5.79961	188.4	61.9	41.7	445.9	691.7
446.5	136.7	527.5	76.7	150.1	44.7	5.3
43.8003	27.4998	249.2	28	18.9	329.1	1464.8
330.2	212.5	258.7	212.4	49.4	7.7	7.8
6.7002	447.1	293.8	446.5	27.3	19.1	6.2
5.3	43.2998	175.099	44.2	20.4	175.5	5.6
14.1001	331.6	19.4004	329.3	180	331	1744
507.4	7.29961	55	7.6	74.2	85.4	8.2
54.9004	18.1001	197.8	19	188.7	134.2	16.5
32.2998	234.7	255.201	176	206.3	429.3	884.4
131.5	274.1	232.2	67.7	248.5	41.3	12.4
470.4	82.8003	658.3	263.4	111.2	44.5	61
44.5001	134.1	820.399	84.8	230.9	225.6	680.8
226.1	470.4	7.00019	134.6	329	9	1425.2
7.99989	45.6004	10.4998	469.6	231.8	298.3	274.8
299.6	224.9	1743.9	44.6	175.8	447.9	432
136.801	8.70011	25.0994	226.3	145.8	52.5	5.4
313.899	300.2	884	8.8	80	156.8	555.2
49.6006	135.7	66.7013	298.7	148	268.7	441.1
156.899	520.9	686.699	448.1	33.9	251.5	246.9
510.2	500.7	1425.7	52.1	21.4	18.5	21.9
10.2998	19.1006	268.101	157	5.2	203.9	240.3
17.4004	17.7998	439.099	510.8	59.3	418.6	9.5
204.6	204.8	560.401	10.2	76.2	120.9	15.1
418	417.7	440.299	18.2	28.5	415	223.4
121.4	122.1	247.701	203.3	74.5	218.3	1398.6
415.5	206.4	24.0995	418.6	96.9	7	6.4
30.8994	208.599	232.799	120.9	41.4	519.8	7.8
187	31.3	14.9997	415.7	169.6	229.2	13.9
5.99978	187	237.5	217.6	164.8	26.5	753.3
520.801	6.30059	208.3	6.8	112.1	252.5	692.4
9.5998	520.399	1022.9	519.9	44	12.4	994.4
219.4	230.4	168.299	10.1	76.5	282.7	6.5
279.399	24.2001	14.1013	219	160	174.1	6.5
10.8001	254.8	16.2991	26.2	93.2	20.6	266.2
284.2	11.5001	750.801	253	7.8	49.6	4.6
173.8	223.9	435.799	11.7	19.1	202.5	944.6
20.0001	58.2002	252.102	283.4	175.3	189.5	296.4
55.1005	129.5	998	174.2	58.8	67.2	49.2
197.9	45.3	13.6992	20.4	31.6	230.9	671.4
255.3	19.4998	227.5	55.6	240.8	7.9	5.5
232.3	49.4003	39.5996	196.9	55.4	648.3	7.4
6.8992	202.3	948.4	255.4	29.9	283	217.4
5	190.3	216.4	121.5	25.3	218.2	16.3
644.601	65.6008	80.6993	110.7	82.5	317.1	6.2
282.599	232.299	49.0996	7.9	26.6	6.3	1210.4
535.701	7.80011	671.201	648.5	427.6	5.4	720.3
4.7998	459.8	11.9006	282.3	42.3	10.5	5.6
5.4002	173.301	218.099	218.4	44.2	209.3	231.9
6.2998	299	16.9005	317.7	188.4	1484.9	11.4
5.2998	217.3	756.799	5.8	38.1	49.5	525.3
209.4	94	456	15.5	8.6	25.5	6.4
1533.3	193.2	723.6	209.7	169.1	122	189.8
4.59961	31.5996	237.5	1485.1	129.4	244.9	7.3
5.50024	9.29961	12.3006	49	137	344	523.8
15.9999	10.9005	469.6	9	310.9	160.3	24.6
872	1476.7	55.2011	16.5	52.5	14.1	1695.4
12.0995	219.6	13.0994	122.1	156.8	65.3	32.5
6.30065	47.5996	182.7	244.9	268.4	211	248.9
61.0002	8.99976	531.201	504.7	232.5	177	191.6
685.801	16.5	25.4999	13.3	19.6	298.3	550.4
78.3983	121.801	895.5	65.8	7.4	78.3	398.8
395.301	243.699	92.8985	388.1	11.5	94.8	18.8
187.4	506.6	706	298.1	203.2	309.2	4.9
98.7989	13	33.1016	78.5	33.3	178.2	778.6
729.901	65.6017	248.5	94.8	237.8	92.4	8.1
204.701	211.199	187.898	301.6	147.4	620	188.2
438.199	177	451.402	185.9	121.2	53.3	724.5
5.40072	298.6	97.3982	100.7	173.5	63.4	20.5
91.4001	78	399.898	612.1	105.2	204.3	211
80.0996	387.5	23.3011	52.3	136.2	198.6	787.6
383.299	195.9	782.699	63.6	31.3	197.7	469.2
5.00011	99.1993	196.5	204.4	66.9	24.6
436.201	613	382.703	420.4	120.2	18.9	239.9
250.4	52.0002	341	19.3	6.9	95.1	492.9
19.5995	267.9	22.0974	5.4	290.9	81.6	222
248.6	196.5	210.403	90.4	228.8	73.3	231.2
216.6	224.6	787.199	81	10.4	223	560.6
21.701	18.6017	469.301	296.9	218.7	85.8	4.6
207.899	96.4999	237.098	85.6	22.5	232.3	5.4
1024	79.799	1949.1	441.3	256.7	200.4	55.8
167.102	75.8005	163.5	223.9	11.6	232.7	62.5
5.79859	220.6	75.3987	27.1	153.6	27.6	726.7
8.80102	87.0001	494.5	19.5	129.8	19.4	20
14.4002	275.801	221.402	233.1	128.8	205	2409.4
245.398	155.299	231.797	15.4	45.5	43.3	5.7
511.5	233.4	559.902	217	20.5	217	160.6
198.801	27.3009	10.4999	229.4	27.4	21.8	702.6
59.5	19.2986	55.3987	419	23.2	207.7	337.4
173.5	233.202	59.1991	374	201.5	165.5	6.1
253	15.3982	704.5	229.9	189.7	253.1	13.3
4.49967	217.102	26.9025	168	66	275.3	243.9
272.199	22.0995	20.3008	14.1	41.8	99.3	351.6
718.801	206.5	2204	14.9	79.7	229.3	606.1
6.99989	224.4	203.898	244.8	44.3	148.6	272.6
8.09972	196.898	165.898	492.7	66.4	20.2	1477.6
267	274.801	660.402	19.3	7.6	13.8	17.7
4.09928	97.4998	43.8987	198	231.6	15	1383.6
985.901	230.301	336.199	60	217.5	245.1	18.1
174.301	167.799	19.7031	173.5	185.4	368.2	512.3
80.1995	7.30091	243.598	252.3	15.5	123.9	245.4
49.701	8.0995	348.5	16.8	65.7	19.6	264.3
671.6	13.4004	609.403	212.2	215.6	197.5	290.2
5.1992	198.5	265.898	184.9	217.6	59.9	188.3
6.9003	539.699	308.102	574.6	38.1	172.9	55.5
211	19.0997	1175.9	14.6	249	252.2	691
7.9005	198.4	19	8.8	31.6	6.5	5.8
12.4998	232	744.301	199	5.4	223.1	1466.8
5.9003	252.4	445.699	67.4	5.5	49	6
240.1	6.40052	192.398	126.7	10.4	135.8	10.5
513.199	222.9	530.203	146	209.4	330.9	1745.2
460.201	50	243.5	662.1	108.3	226.9	7.9
720.399	710	266.5	55	72	28.2	16.7
5.40017	14.5997	285.199	173.8	495.1	12.1	884.5
231.701	8.7987	189.199	81.3	336.1	199	66.9
11.5997	224.801	55	49.7	473.6	67.9	687.1
469.1	41.6995	202.898	620.3	48.3	10.3	1425.1
57.6991	10.3007	254.703	51.2	5.3	116.2	274.8
5.49978	116.6	232.199	6.5	21	145.8	432.1
160.901	145.801	11.3987	216	118.9	462	5.4
28.0995	675.699	1462.7	20.2	58.4	199.9	555.4
7.40026	42	10.2031	246.1	60	55.2	440.8
487	173.6	11.1992	513.7	127.4	173.7	246.9
37.9002	81.0001	1743.9	460.3	346.1	81.9	22
24.3985	48.9002	25.6991	556.8	160.6	49.1	240.7
203.801	357.1	884.102	133.1	13.1	158.2	9.3
691.101	263.5	66.6993	31.1	66	175.7	15.7
800	51.4002	2112.5	209.8	210.5	286.5	222.4
33.1991	10.801	268.601	28.3	177.1	51.6	208.4
230.301	212.4	438	10.7	36.3	6	1190.3
17.8985	19.3985	474.301	136.1	222.8	215.7	6.6
191.301	247.701	86.3982	154.2	40	20.9	7.8
293.102	512.9	441.102	234.6	78	9.3	14
154.598	255.5	247	6.8	94.6	236.6	753
97.301	200	23.9998	160.3	150.4	513.6	692.5
399.301	724	238	29	141.4	254.5	994.6
5.6992	6.69911	10.4997	7.6	196.1	129.5	6.4
18.5	230.801	236.898	172.3	91.3	77.1	6.3
4.80078	12.0995	1399.3	313.3	197.7	128.1	266.3
785.899	248.199	14.0002	38.4	423.5	427.9	4.7
189.101	219.701	17	24.7	35.3	132.9	944.4
6.19909	57.5996	750.199	204.1	18.3	31.5	296.6
375.699	6.69909	689	690.1	62.9	208.9	49.1
304.301	161.5	999.398	56	204.1	28.4	671.4
36.6992	27.8007	11.6016	233.8	113.9	11.4	5.6
6.40241	7.90061	266.203	324.8	84.7	135.6	7.3
15.797	172.599	949.297	106.2	198	154.9	217.3
211.5	315	296.297	80	23.7	177.8	16.4
561.602	36.0996	49.5001	32.8	19.5	57	6.2
196.5	24.3008	671.101	229.7	5.6	6.7	1210.7
498.199	206.098	11.8985	19.1	89.7	160.1	720.1
236.403	689.703	218.305	166.3	67.8	29.2	5.5
1635.2	54.3984	16.7967	25.2	86.8	7.5	232.2
314.098	40.5001	1216.2	292.8	223.1	171.6	11.2
6.5	701.199	720.398	154.2	86.3	314	525.2
156.703	35.9023	238	97	6	38.4	6.3
75.2968	231.5	15.5001	398.9	226	25.4	189.9
128.902	17.4999	520.602	7.4	133	202.9	7.2
347.699	168	196	17.8	66.6	460.7	523.9
17.9998	23.3984	8.39844	471.4	233.2	229.6	24.4
162	447	523	309	24.4	94.9	1695.6
59.3982	97.8984	25.797	10.8	22.3	195	32.6
185.602	399.602	950.101	177	205.6	232.9	248.7
382.5	23.6015	38.5	11.6	29.7	92.6	191.6
32.8007	524.098	705.5	381.4	13.8	104.7	550.1
142.301	251.902	33.5001	304.6	213.4	81.2	395.5
49.1992	14.8983	248	36.9	23.9	32.8	22.5
4.19922	176.398	191.5	22.1	137.7	229.1	5.1
5.60178	13	545.203	210.1	51.5	19.5	777.5
55.5977	100.301	399.797	229.5	20.5	166.1	9
225.601	586.602	23.3986	332.4	164.5	25.5	188.1
86.8009	36.5	790.5	197.1	58.2	194.4	728.4
190.898	21.3007	188.805	32.7	195	93.5	16.9
41.1991	210.098	382.5	464.9	274.8	158.6	211
168.199	229.801	346	236.7	49.1	97.2	787.2
50.3006	334.699	17.3983		50.1	398.7	469.1
26.9023	223.102	997.398	214.5	229.9	25.6
20.0976	397.098	469.398	313.9	147.9	10	239.2
255.402	68.1018	237.102	163.3	20.9	461	493.6
188.098	241.301	1949	76.5	6.7	290	221.9
455.102	1431.6	163.703	128.3	7.7	29.7	231.4
110.898	204.801	75.2968	103	14.1	175.9	560.4
1115.8	312.5	494.305	244.6	148.9	13.4	4.6
77.4999	163.801	220.898	17.9	49.7	132.9	5.5
205.898	75	231.602	161.2	46.6	131.3	55.8
5.60162	130.602	370.797	59.6	368.5	116.9	62.4
132.801	363.5	190	231.4	123.4	304.7	726.9
27.6993	163.797	10.3986	336.9	16.4	37.1	20
659.898	58.3009	55.2029	33	201.1	22.1	2406.5
44	227.5	58.1016	191.4	60.2	193.6	4.3
330	374.801	255.195	9.9	172.8	244.7	164.9
6.60156	142.199	231.805	55.4	252.2	332.5	702.6
5.3985	47.6992	218.695	62.8	6.1	197.4	332.6
14.1018	9.50022	26.7032	164.2	12.1	33.8	6.2
507.101	55.8008	20.6016	85.6	211	392	17.9
55.0975	58	2202.9	190.9	48.8	72.9	243.8
634.602	168.699	204.898	209.5	136.3	236	351.7
44.3985	86.4024	166	50.1	330.7		602.1
226.301	191.301	660.797	27.2	226.1	214.8	277.5
7.49972	42.3984	43.3047	20.3	29.1	213.4	1476.6
299.898	166.199	330.898	255.7	12.1	101.5	17.7
450.703	51.4024	10.7969	187.3	52.4	162.6	1190.6
206.5	25.9999	14.8047	454.9	146.4	76.3	193.2
510.199	19.8985	591.5	110.8	27.5	127.7	18
9.80091	254.699	604.5	968.2	40.6	103.8	512.3
5.69922	190	270.602	148.1	5.6	226.8	241.9
12.3986	216.902	1484.3	77.1	38.8	36.3	267.6
203.801	237.398	19.3984	181.6	82.3	161	284.9
418.199	1227	1379.2	24.8	145.5	59.5	190.1
121.403	77.3984	524.695	138.7	169.1	186.2	58.5
633.797	181.301	249.5	686.8	292.8	46	691.7
5.80102	24.1993	268.703	44.5	156.9	335.5	5.6
6.10134	139	284.203	329.3	43.6	33.6	1464.5
514.801	27.0001	175	7.3	15.7	120.2	8.2
9.39828	212.703	19.5938	19	39.2	70.7	6.3
219.899	447.297	55.703	175.7	173.7	11.3	5.7
24.8006	43.2031	196.898	67.9	35.9	54.6	1743.7
254.5	330.797	255.203	263.6	46.2	58.2	8.2
10.1992	7.40241	232.695	84.6	49.2	156.9	16.6
284.402	18.3984	11.3047	134.1	157.8	96.9	884.5
7.69944	234.699	1467.1	429.4	176.7	190.7	66.6
165.898	273.102	11.7968	41.4	285.2	41.7	687.4
20.2031	83.6018	1749.1	44.4	42.9	168.4	473.6
50.2971	134.199	25.4998	226	9.6	50.4	951.5
202.902	470.5	884.5	8.8	5.7	27.3	275.4
255.199	46.0976	66.1954	298.5	215.7	20.2	431.6
232	224.602	687	137.7	20.4	253.8	5.4
7.30078	8.60184	1701.5	314.1	7.3	188.8	555.2
5.09744	300.297	431.102	49.3	239.1	218.4	440.8
644.602	450.602	560.102	156.5	32.9	236.3	247.3
282.301	716.699	440.898	510.3	480.5	111.1	21.9
536.301	13.1992	247.305	10.3	99.3	230.9	240.1
4.29681	758.5	25.5936	18.1	155.3	330	9.6
5.30072	444.402	231.5	203.5	129.4	406.8	15.1
6.19928	189.5	15.2031	418.2	73.3	148.6	222.8
5.30076	6.3985	446.297	121.1	132	77	208.7
1743	520.199	1022.6	415.8	428.7	148.5	1190.5
4.40226	249	168	217.6	132.6	33.8	13.6
5.79688	268.301	14.3047	6.9	30.8	24.6	6.5
15.8007	284.602	16.297	520	6.3	61.4	9
872.301	174	750.5	10.2	203.5	76.4	752.2
11.8982	20.3986	436.102	218.5	27.6	29.1	689.5
5.70341	49.9023	253.898	22.9	11.4	73.4	15
61.2966	202.398	998.203	256.4	136	138.3	982.6
686	255.102	11.5001	11.8	154.9	170	6.7
473.602	232.797	266.594	283.4	148.1	276.2	6.3
187.398	7.301	127.5	174.1	80.9	44.2	266
98.9023	648.699	862.805	20.5	6.6	329.7	4.7
729.801	284.602	976.102	55	5.9	7.8	944.5
204.699	533.898	230.297	197.4	160.1	19	296.5
438.699	6.60161	16.6016	189.7	28.7	175.4	49.1
5.10162	14.8008	1217.4	66.4	7.5	68.5	671.5
90.7969	1743.5	719.898	121.1	172.1	262.6	5.5
377.801	9.3007	247.305	110	313.8	56.1	7.7
85.6992	16.5	526.094	8.1	38.2	33.4	216.9
5.1015	122.898	12.3046	648	24.7	130.1	16.3
660.398	750.398	184.102	283.1	158.5	428.2	6.6
45.7031	15	531.297	218	45.9	42.1	1210.3
234.098	62.801	25.297	317.9	461.8	44.2	720.2
14.9023	423.5	949.101	5.8	228.1	226.1	5.8
216.297	263.199	39.7033	5.4	50.3	8.9	231.6
21.6018	78.3008	705.797	10.6	44.6	298.5	11.4
627.601	402.801	34	209.4	194.8	137.2	525.3
604	180.801	247	1485.1	233.4	310.4	6.4
168.199	763.899	187.898	49.1	91.5	53	189.8
5.8007	268	548	9.1	105.3	156.5	7.3
8.19922	438.402	399	16.4	48.9	268.4	523.7
14.5976	98.7972	24.9062	122.3	32.3	232.1	24.5
245.102	375.5	790.5	244.5	32.5	20.3	951.2
709.801	86.6016	188.797	344.8	229.7	18.5	744.4
59.4999	440.398	728.297	160.1	19	203.2	32.5
173.699	224.801	17.6016	13.6	166.3	418.6	248.9
252.297	26.5001	1001.1	65.3	22.1	121.3	188.3
5.30473	19.6015	465.898	211	197.6	173.9	4.8
272.399	232.801	236.398	177	98.4	241	548.5
722.297	15.1992	1949.5	298.4	129.6	98.5	395.2
5.80487	217.898	164.101	78.5	25.2	119.7	22.8
6.29672	227.801	81.3986	94.7	96	7.1	5.1
266.5	224.5	487.703	292.3	399	291.4	785.5
4.20306	196.5	221.297	195	6.9	228.2	189.1
122.5	373.199	231.5	91.5	18.5	10.7	724.2
145.195	229.801	560.602	621.5	5.9	218.7	21
662.703	173.699	10.3046	52.3	465.4	27	211
14.7967	8.8008	55.8986	63.8	53.1	251.9	787.3
40.3048	14.1992	62.2968	204.4	236.9	12.6	469.3
173.898	199.199	249.898	199	29.4	153.3
82.3984	553	232.305	240.1	175.8	129.2	239.1
48.2033	204.801	217.898	5.8	13.4	129.7	493.5
356.398	231.504	27.6015	90.5	7.3	44.8	222
263.898	251.898	20.6016	80.8	92.7	20.5	231.2
51.3986	6.29675	254.297	296.9	33	49.7	560.7
5.3045	272.898	643.102	85.5	131.8	202.3	4.5
7.1016	719.602	1305.1	431.6	116.6	190.8	5.6
210.094	12.5001	205.297	233.6	304.3	65.4	6.3
8	225.703	166.203	27.4	37.3	231.5	49.5
12.8048	41.6016	659.898	19.2	21.9	7.8	62.2
6.29675	9.39831	43.8983	234	194.6	447.6	727
239.602	939	330.898	15	16.7	200.9	20.1
513.297	42.8984	10.8985	216.6	227.5	67.3	2409.1
1017.6	174.5	14.8047	22.5	38.9	215.1	5.6
163.602	79.2031	592.5	136.8	293.8	218	160.9
5.20316	49.1953	608.602	70.2	197.4	38.2	702.6
232.094	357.305	265.297	165.5	29.6	279.7	332.5
11.2031	314.297	308.602	253.5	395.2	6	9.8
290.899	11.0001	1176.7	274.8	57.9	5.5	14.4
235.601	213.5	1400.61	99.4	16.3	10.3	244
5.70319	18.6016	530.297	229.7	235.5	209.3	351.6
160.399	247.5	242.391	168		180.1	605.8
28.5	968.797	267.406	14.2	214.7	1305.8	273.5
7.49981	723.5	284.094	15.1	213.6	48.7	1476.9
173	6.80487	174.406	244.3	56.6	9	17.8
313.5	230.695	20.2967	492.9	44.1	16.5	1383.5
38.1016	12.2031	55.203	19.5	162.7	122.2	18.7
6.89829	248.695	197.5	197.7	75.5	244.2	503.8
18.1017	219.602	255.093	59.9	128.8	344.6	253.2
203.797	56.8986	232.406	173.3	103.6	160.5	264.3
690.398	7.00006	11.5003	251.8	226.9	16.4	290.4
95.0002	188.703	1467.2	6.3	32.9	62.8	188.1
705.5	8	16.7969	11	141.2	210.9	55.5
32.8986	488.297	1744.41	212.4	23.4	177	453.5
229.906	35.7032	25.0938	49.1	58.9	258.6	237.6
18.6953	24.5	884.297	135.8	186.5	39.8	5.8
166.703	989.797	66.4064	557.4	42.2	78.4	1464.7
25.7969	702.305	424.203	28.2	105.3	94.6	7.9
291.602	35.6952	262.594	12.2	234.2	291.5	6.4
154.602	232	78.7031	199.7	33.3	195.9	5.5
97.2968	17.1016	583	67	119.9	92.1	1743.7
398.5	187.203	763.797	126.9	71.2	620.7	8.3
6.20312	5.99994	268.406	145.7	5.3	53.4	16.6
18.8985	445.602	438.89	662.1	8.9	63.1	884.5
4.70325	98.1953	251.5	54.8	51.3	204.3	66.7
756.594	399.203	222.5	174.3	57.9	396	687.1
20.6017	22.9998	86.2031	81.4	167.7	43.2	1425.1
9.20306	781.195	431.703	49.7	86.7	5.6	707.2
188.695	198.102	233.203	355.9	190.4	90.6	5.5
6	269.602	27.297	264.1	42	80.8	555.2
375.601	454.5	20.8904	51.3	150.6	73.4	440.8
304.203	21.3985	231.5	6.2	67.4	223.1	248
37	210.203	15.8125	215.8	27.4	85.7	21.1
6.1015	268.602	237	20.8	20.2	232.6	240.7
16.0939	519.195	208.688	246	181.1	199.1	9.1
211	464.703	1022.5	513.7	73.7	233.3	237.8
228.305	242.195	168.609	383.9	188.3	27.9	1399.1
530	1948.6	14.2967	76.8	218.1	20	6.3
498.399	164.398	16.0938	556.1	236.9	233.1	7.8
236.297	74.4064	750.609	133.1	111.1	14.8	14.1
1635.6	491.094	203.797	31.2	231	213.1	753.2
313.898	166.602	232.203	208.6	329.1	25.5	689.9
6.40631	58.6016	252.391	28.3	231.8	137.1	14.6
157.094	227.703	17.3125	11.8	175.8	70.8	982.6
75.5	517.797	262.094	135.9	145.2	165.3	11.8
128.805	46.6016	718.203	113	80.1	252.8	267.2
365.602	9.39859	13.7967	42.7	148.4	275.4	4.7
162	55.7968	226.906	176.5	33.7	98.8	944.4
59.1953	58.5	40.094	52.2	24.6	229.9	296.5
601	168.203	127.406	11.3	6	168.5	49.4
191.398	86.7967	821	160.8	55.7	14.1	671.2
4.30463	231.203	216.093	29	76.3	15.1	5.5
5.60162	219.102	81.2969	7.5	28.1	245	7.5
55.5001	26.6016	49.5	171.9	74.2	368.7	217.3
61.8985	19.5938	670.5	142.6	97.1	123.3	16.2
163.797	256.805	12.1096	171.3	41.7	19.9	6.3
86.8982	1947.6	213.188	38.2	169.7	197.3	1210.7
399.805	180.695	21.7031	25	276.5	59.8	720.1
50.6014	24.1014	243.5	203.6	43.9	173.7	5.5
27.0938	67.6017	972.797	461.3	330	252.8	231.9
20.1016	98.1953	720.203	229.1	7.5	228.7	11.4
443.5	660.5	237.203	56	19	48.4	525.3
455.203	42.8047	12.2968	39.3	175.5	136.2	6.3
110.602	331.602	468.5	194.3	59.1	330.8	189.8
1193.3	10.5001	56.5	89	32.1	227.2	7.3
206	14.2968	168	235.4	240	28.4	523.8
5.60156	591.797	28.2031	106.3	55.4	11.7	24.5
160.399	134.906	530.906	80.6	30.5	198.9	990.5
74.4999	470	25.5939	32.7	24.9	67.8	705.1
585.703	270.5	988.094	229.6	83.3	126.5	32.5
43.7968	8.59369	706.109	19.3	32.6	146	248.8
330.203	300.5	33.2029	166.1	421	461.7	188.2
6.50006	1166.6	248.594	25.3	42.2	199.8	4.8
5.39829	13.6015	187.797	287.4	44.3	55.4	548.8
13.797	759.297	548	159.7	225.7	174	395.5
507.398	443.703	400.703	96.9	8.7	81.8	22.3
87.7031	189.797	23.2969	398.5	298.9	49.7	5
131.297	526.5	781.797	7.3	137	157	776.8
470.305	248.703	197.407	18.2	311	462.9	9.7
44.2969	268.297	382.797	471.7	52.6	51.4	188.3
226.5	284.906	341	290.1	156.5	10.8	728.3
7.60152	174	21.9062	28.7	268.8	211.6	16.9
299.797	20.0001	210.703	176	232.4	20.4	211.2
657	49.7968	787.891	13.3	19.3	9.1	787.2
510	203	468.61	133.1	7	236.7	469
10.5	254.703	236.687	248.2	12.1	513.7
17.4063	232.797		304.6	203.1	254.3
204.399	7.39846		37	418.1	206.8
418.195	649.305		22.2	121.5	556.5
121.5	818		193.9	173.8	163.2
633.305	9.99981		17.4	105.6	6.5
6.10156	10.6955		227.5	135.7	230.8
5.99994	1744.2		332.7	31.1	11.9
514.797	8.99985		197.1	66.9	467.9
229.399	16.6016		30.1	120.3	57.4
24.8983	874.094		395.8	6.6	6.7
254.102	13.9063		72.6	291.7	160.1
10.8046	63.0001		236.3	228.3	29.4
284	423.797			10.4	7.5
173.594	263.203		214.2	218.6	171.8
20.4064	474.195		269.8	22.5	313.6
54.8984	188.102		44.6	256.7	38.4
197.601	762.703		162.9	11.6	24.9
255.398	268.594		81.6	154.3	203.8
232.5	438.5		123.2	129.2	460.5
7.10162	474.703		348.8	128.7	229.8
648.898	86.1016		16.8	45.5	95.2
283	431.5		161.5	20.4	194.5
535.797	234.102		59.5	49.5	325.3
4.89859	25.7969		228.2	202.7	105.1
5.40613	22		339.2	189.6	80.9
10.7969	231		33.5	65.9	33.1
210	15		191.3	42	229
1533.3	217.797		10.1	79.9	19.3
4.80466	227.703		55.4	44.4	165.9
5.69534	1024.7		62.7	66	22.6
15.8047	167		164	7.6	296.3
121.297	13.8983		85.9	300.5	153.9
244.398	14.3986		190.4	148	96.8
506.203	256.102		209.4	184.8	398.5
12.3984	496.602		50.4	17	25.4
66.7032	204.594		27.3	65.6	9.9
686.195	231.805		20.5	215.4	461.4
660.906	252		254.6	217.7	290.1
764.5	6.29669		188.4	38.5	29.4
64.1952	272.5		454.9	248.5	176.7
204.602	718.805		111	31.9	12.8
439.101	13.6954		1116	5.5	132.7
4.99996	226		77.2	5.7	248.2
91.1016	41.5001		181.8	9.8	304.6
463.297	59.3047		24.7	209.5	37.1
5.10156	888.594		138.6	179.7	22.1
660.297	42.7033		240.6	495.7	193.5
26.4998	254.203		446.3	335	18.4
19.3985	49.1951		43.7	255.7	226.6
248.805	622.305		330	218.2	332.4
216.399	49.5001		7.5	48.3	197.5
21.7967	10.7967		19	5.9	33.7
208	213.297		175.6	21.1	392.1
419.703	18.6016		67.9	119.9	73
603.797	248.102		263.1	57	236.1
167.602	968.5		55.3	60.8
5.89856	723.297		30.5	127.2	215.2
8.60156	7.10156		24.9	345.9	269.1
14.3982	230.305		108.6	160.5	45.7
245.406	12.2967		470.3	13.3	162.5
511.399	468.297		44.8	65.8	76.4
198.398	57.0001		225.6	210.7	127.8
59.5	6.90631		9.1	176.9	104.2
173.398	188.898		298.6	36.7	226.4
252.602	7.8984		137.5	222.4	36
5.10138	488.602		314.4	40	161.6
272.5	35.5001		49.1	78	58.9
722.297	24.4998		156.3	94.8	186.4
11.5	945.899		268.5	150.1	46
267.203	44		242.6	141.6	128.1
4.29681	705.398		9.9	196	207.4
122.102	32.6016		17.8	91.2	33.5
145.703	231.602		203.5	197.2	191.1
662.695	17.1016		418.7	423.9	9.8
54.9999	187		121	35.7	55.9
173.805	6.00006		415.7	18.6	58.9
81.0937	446		217.4	62.2	253.2
49.2033	97.797		6.9	148.2	190.8
620.898	399.398		519.9	56.4	209.9
50.9999	23.2031		10.1	198.2	50.2
5.2031	9.69531		219.1	198.1	27.3
7.60171	516.305		26.3	23.8	20.1
218.094	255.398		252.6	19.7	254.5
12.5	198.102		11.7	5.5	188.2
8.40631	100.797		283.3	89.8	219.5
237.398	169.102		174.5	67.3	235.5
513.297	454.5		20.4	87	110.9
460.305	21.203		55.3	135.7	231.2
557.398	210		196.9	87.5	329.4
163.602	564.297		189.7	86	231.7
5.19519	223.297		65.9	6.3	175.8
204.102	707.305		121.5	225.7	148.2
27.8983	1948.3		110.7	44.9	77.3
11.2031	164.305		8.2	88.6	148.3
290.899	74.5937		648	66.1	33.7
235.398	477.406		282.8	53.1	24.7
5.70312	18.5001		218.7	180.3	137.2
160.695	161.594		317.7	24.3	29.5
35.7031	58.6016		5.4	22.5	73.7
6.89856	227.398		225.2	205.1	138.3
166.305	515.602		1484.8	29	169.6
313.297	49.1016		49.2	14.9	276.6
38.1017	9.20309		9.1	98.8	44.6
24.6952	56.0939		16.6	114.4	329.1
203.906	58.2029		122.2	24.2	8
690.594	169.203		244.4	137.8	19
94.6016	86.297		504.9	51.4	175.6
706.102	231.102		14.3	20.5	331
33	168.797		64.8	164.3	85.8
229.602	51.703		211.4	59.3	133.6
18.8984	25.1016		212.8	134.2	428.7
166.703	19.6954		262	60.2	42.4
317.297	255.898		78.5	274.4	44
154.203	2149.3		94.9	38.4	225.7
97.1952	8.99981		301.1	61	8.9
399.305	159.797		186.5	127	298.1
6.00006	661.203		100.3	102.7	452.5
18.8984	43.1016		613.2	147.9	48.5
4.89841	331.594		51.6	20.9	156.2
466.899	10.3047		63.6	6.8	268.6
310.102	14.6016		204.4	7.8	231.9
9.10156	265.297		439.1	14.3	20.5
188.695	326.297		5.9	148.5	18
6.203	135		90.3	49.8	203.7
375.398	470		80.8	46.4	418.6
304.398	270.602		297.1	368.6	121.2
37.0001	8.50004		85.6	123.4	415
6.20325	300.305		232.2	16.5	218.1
15.8984	1166.9		209.5	200.8	6.9
211.203	13.1016		223.3	60.1	519.8
228.5	759		27.5	173.1	229.4
332.797	444.203		19.6	252.4	26.8
196.898	189.797		233.4	6.2	252.3
498.406	775.297		15	11.5	294.9
236.195	268.297		216.8	211.3	174.2
1635.9	284.703		229.3	48.6	20.8
313.602	174.203		166.1	136.5	55.5
6.20325	19.8908		252.9	330.5	196.6
157.398	50.1092		275.7	226.4	189.9
74.7967	202.703		98.8	29	66.7
494.703	254.687		229.3	12.2	164.5
161.898	232.703		168.3	52.1	66.5
59.5	7.60938		14.2	146.5	7.8
568.102	648.797		15.5	28	649.1
32.8983	284.891		149.1	40.3	66.4
191.5	533.5		95.2	10.5	215.3
4.20312	6.31262		368.4	33.3	217.9
5.60162	14.7966		123.8	82.7	318.1
55.5001	1743.89		16.1	145.7	6
225.594	9.31238		201.3	168.7	5.4
86.9063	16.1877		59.7	293.1	10.5
190.797	873.703		173.7	156.4	209.1
208.898	14.2966		252	44	180.5
50.7033	63		6.1	54.8	1304
27.0001	423.812		11.2	173.9	48.5
20.1952	263.188		212	35.6	27
255.406	481.313		49.3	46.6	367.3
188.195	943.594		466.4	48.7	343.5
455	268.797		252.3	157.9	160.5
111	438.5		8.3	176.3	16.7
1115.6	474.797		7	269.8	63.2
77.4998	86.1094		198.3	17.6	423.4
206.102	431.703		67.9	50.5	262.1
5.797	233.687		126.8	6.1	78.8
160.203	26.1094		145.7	215.7	95.3
660.102	21.7969		462.2	9.3	487
43.7968	230.906		199.8	12.3	712.4
330.203	14.8907		54.9	8.9	115.9
6.59375	217.797		174.2	126.2	205
5.1015	228.203		81.4	110.1	396.3
14.2032	1024.5		49.4	33.5	43
507.195	166.906		356.4	180.6	5.5
55	13.8907		264.2	298.8	90.2
32.7031	14.6091		51	100.1	81.1
646.399	199.594		6	71	73.3
225.703	553		216.3	84	223.5
7.99988	204.5		20.5	129.1	85.7
299.297	231.609		246.2	73.6	232.2
451	252.188		513.6	131.8	209.9
206.203	6.703		255.5	428.1	223.1
510.5	272.203		202.1	132.8	27.4
10.297	710.203		559.7	31.1	20
17.3984	14.2031		163.3	6.4	233.4
204.601	8.79685		6.6	203	14.7
539.305	225.391		204.5	28.2	213.8
633.297	41.1094		27.9	11.6	232.2
6.40608	948.391		10.5	135.4	165.4
520.391	43.9061		135.9	101.2	253.2
9.70308	173.094		155.1	53.8	275.1
219.5	79.5001		177.9	145.4	99.3
279.406	49.203		56.2	34.2	229.8
10.7967	671.609		6.7	49.8	147.9
284.094	10.6878		160.4	6.9	20.7
173.5	213.906		29	6	13.9
20.406	18.5001		7.5	159.4	15
252.703	248.297		172.1	26.4	149.2
189.297	968.609		313.5	10.1	464.1
65.9999	723.297		38.3	171.9	123.9
232.5	6.39078		24.9	143.1	19.9
6.89065	230.812		203.9	70.9	197.2
5.10938	12		690.1	99.9	59.7
644.797	248.891		56	38.3	173.7
282.094	220		39.4	25	252.7
535.906	56.6094		194.2	157.8	228.8
4.90613	7.18762		325.5	46	48.3
5.49998	188.406		106.3	460.1	137.1
10.5	8.00027		79.5	229.8	330.4
210.297	523.406		33.2	50.2	254.2
1533.2	24.6875		229.3	44.8	12.4
4.68722	990.703		19.2	195	199.1
5.60935	701.703		166.7	24.2	68
15.8907	35.7031		24.7	65	126.5
121.5	232.094		293.1	143	146.2
244.703	16.9997		153.9	91.9	661.5
505.703	186.906		97.5	106	55
12.4064	5.8908		398.4	48.9	174.2
66.5935	445.906		25.1	32.5	82
210.797	97.7031		471.9	32.6	49.2
475.406	399.891		309.3	229.3	334.1
78.2969	23.0003		10.2	19.4	286
582.406	525.812		188	165.9	51.4
764.797	255.688		382	22	222.1
63.7971	197.906		304.6	5.3	20.9
204.797	723.797		37	119.8	245.6
439.297	21.7034		21.9	72.7	33.8
5.10938	210.094		210.2	93.2	479.5
91.094	231		229.1	134.2	254.6
377.5	333.406		334.1	25.7	207.1
85.6094	223.297		195.6	96.4	555.6
5.094	465.203		32.8	398.8	133.4
687	241.906		392.4	7.1	31.6
19.2969			73.1	18.6	208.9
234.203			236.4	9.9	38.7
14.5939				460.9	136.3
237.812			214.6	53.1	155.1
208.187			314.3	236.9	234.5
419.906			163	22.7	6.7
603.297			82.6	7.9	160.2
168.109			122.2	174.9	29.2
5.7969			364.9	13.4	7.4
8.59375			162.3	91.1	172.9
14.5			59.3	41.8	312.8
245.406			228.3	131.8	38.5
492.203			339.7	116.5	24.9
19.1875			33	303.1	203.4
198.5			191.4	37.8	460.6
59.4998			9.9	22.9	229.6
173.5			55.5	127.2	94.8
252.109			63	66.6	194.9
5.29717			163	17.1	89.4
272.406			86.4	227.8	235.8
721.688			190.8	38.9	105.1
5.99985			209.9	293.4	81.2
6.90625			50	197.3	262.1
198.203			27.2	29.7	19.5
68.3907			20.1	379.6	165.9
4.31238			254.7	66.1	25.6
122			188.3	23.6	194.5
145.594			455.2	235.9	252.3
662.906			110.8		97
55.0937			968.1	17.2	398.4
173.906			148.3	17.1	25.5
80.797			76.9	180.4	10
49.4998			181.7	213.3	461.1
620.5			24.7	56.5	290.1
51.0938			138	45	29.6
5.2969			29.3	162.4	176.8
7.60965			658.2	53.8	12.7
209.703			44.2	23.1	132.8
8.39075			329.5	127.5	248.2
12.6091			7.6	103.2	304.7
8.2969			18.8	227.1	37.2
237.297			175.7	32.6	21.9
513.5			67.9	164.7	194.1
1017.5			263.4	59.5	245.1
163.5			84.8	123.4	331.8
5.29675			25.7	63	197.5
232.109			108.8	42	33.8
11.1875			470.1	104.8	449.8
291.11			44.5	27.8	251.1
235.593			226.3	158.5
5.40655			307.2	48.5	215.1
160.594			451.7	33.3	314.4
28.4062			49	119.5	162.6
7.50017			156.7	71.6	76
173			510.6	5.6	128.7
313.203			10.6	9.2	330.5
38.297			17.9	50.8	37.1
24.7029			203.2	57.8	160
203.891			418.5	156.3	59.4
690.5			121.1	97.7	228.2
94.906			415.6	190.6	339.6
705.797			217.8	41.9	33.4
33.2968			6.8	149.7	191
229.406			519.9	19.2	10.8
18.7969			10	49.3	55.2
166.703			219.3	27.6	62.9
24.4999			26.1	20.2	249.1
292.703			252.8	179.8	190.6
154.391			11.9	74.4	210.7
97.4997			283.2	188.3	49.4
398.797			174.2	207.2	32.7
6.20318			20.4	248.2	15.5
18.9065			55.7	111	253.6
4.9997			196.7	231	188.6
466.594			190	329.1	454.9
318.703			66	231.7	111
189.297			231.4	175.8	231.6
6.90625			7.9	144.5	560.5
374.594			648.7	81.2	175.7
304			282.4	148.3	148.6
37.297			217.9	33.7	77
6.40625			318	24.7	181.8
15.9998			5.7	6.5	24.9
211			16	54.9	62.1
228.203			209.6	76.1	75.4
332.5			1484.8	28.6	102.8
197.094			49	74.1	584.6
425.5			25.6	96.9	44.7
73.2031			122.3	41.8	329
236			243.3	169.3	7.9
			506.2	164.9	18.9
			13.4	112	175.6
			65.7	44.2	330.9
			210.9	75.8	85.8
			213	160.5	603.8
			262.4	93.3	44.8
			78.5	7.8	226.1
			94.9	19.1	9
			301.1	175.2	298.5
			186.1	59	452
			100.7	272.3	48.4
			612.4	55.1	156.8
			52.3	30.6	268.3
			63.5	25.1	251.9
			204.4	82.3	18.4
			420.4	26.8	203.9
			19.2	170.4	539.4
			95.9	256.9	415.2
			80.7	42.3	218.1
			296.8	44.2	6.9
			85.7	188.4	519.6
			432.3	38.2	229.4
			232.8	8.6	278.8
			27.4	168.7	295.3
			19.8	129.7	174.4
			234.8	137.1	20.6
			13.7	310.6	252.6
			216.5	52.6	189
			21.9	156.9	66.4
			207.4	268.2	231.7
			166.2	232.5	7.8
			253.3	20	649.6
			275.5	18.1	65.9
			98.1	203.5	215.4
			229.9	32.9	218.9
			168.1	237.7	317.4
			14.3	143.3	5.8
			15.1	126	15.5
			244.7	50	209.6
			492.5	123.5	1010
			19.3	104.5	474.6
			197.8	136.9	49.6
			59.9	31.4	9.1
			173.5	66.8	16.7
			252.4	120.3	366.6
			6.1	6.9	504.4
			11.3	290.6	16.6
			260	229	62.9
			468.4	10.5	210.8
			243.2	218.6	212.8
			11.8	22.3	262.6
			11.1	256.9	78.6
			199.2	11.7	95.1
			67.2	153.2	486.9
			126.8	72.6	713
			145.8	57.8	54
			662	128.2	61.9
			54.8	46	204.5
			174.2	17.2	439.2
			81.5	29.8	96
			49.4	24	81.2
			357.2	144.1	73.7
			263.2	57.6	223
			51.4	189.2	85.3
			12.8	66.2	233
			209.5	40.9	209.5
			20.5	55.2	223.2
			246.1	69.6	27.8
			513.6	66.5	21.8
			457.6	7.8	230.9
			559.6	230.4	14.8
			163.2	70.4	217
			6.5	147.5	229.4
			231.3	173.5	418.2
			11.6	27.8	275.6
			290.8	65.6	329.1
			230.7	36.9	167.9
			10	178.8	13.9
			160.9	217.9	14.9
			29	38	149
			7.5	249.1	95.8
			172.4	31.5	368.8
			313.3	5.6	124.1
			38.1	5.8	19.6
			25.4	10.1	197.3
			203.4	209.2	59.7
			690.4	108.3	173.6
			56.4	71.9	252.3
			38.6	495.1	229.7
			195.2	334.9	48.3
			429.9	255.5	466.3
			80.6	218.8	255.3
			33.3	48	12.2
			229.2	6.1	199.3
			19.1	21.3	67.6
			166.6	118.6	126.8
			24.9	58	145.8
			293.2	61.3	661.6
			153.5	126.7	55.3
			97.8	345.9	173.8
			398.3	160.8	82.2
			7.3	13.3	49.4
			17.9	65.9	158.2
			471.8	210.3	462.9
			308.8	177.1	50.3
			10.7	36.5	11.9
			175.9	222.6	212.4
			12.8	39.9	22.2
			381.2	78.1	242
			304.6	94.7	513.7
			37.1	150.2	254.3
			22	141.5	129.2
			194.9	195.9	77.6
			244	91.2	555.9
			333.2	197.2	133.6
			196.7	423.9	31.3
			29.8	34.6	236.6
			395.9	19.4	11.9
			72.6	62.5	524.8
			236.2	146.5	7
				58.3	160.1
				112.7	29.3
				85.9	391.9
				133.6	101
				63.7	38.6
				24.4	25.6
				19.5	203.1
				5.6	689.8
				89.5	94.8
				67	195.1
				87.3	324.3
				135.6	187.1
				87.9	33.2
				85.7	228.8
				6.3	19.6
				139.8	166
				85.9	25.4
				37.2	448.1
				95.8	96
				67.1	398.2
				52.4	25.5
				180.7	10
				24.1	462.8
				22.8	309.6
				204.8	185.1
				28.9	12.7
				15.3	380.8
				212.8	303.6
				24.5	38.2
				137.7	22.2
				51.2	193.8
				20.7	245.7
				164.3	331.7
				58.6	197.3
				134.6	33.5
				60.4	392.3
				203.5	73.2
				71.4	235.6
				49.4
				49.7
				126.5
				103.2
				53.1
				94.8
				21
				7.1
				7.7
				13.9
				148.5
				49.8
				46.3
				181.8
				186.9
				123.6
				16.1
				201.2
				59.7
				147.8
				26.2
				195.7
				56.3
				6.1
				12.1
				44.2
				156.4
				10.4
				48.2
				136.4
				246.4
				83.9
				59.4
				167.2
				29.1
				12.3
				52.3
				146.4
				67.9
				5.9
				38
				82.7
				143.1
				170.7
				293.8
				156.3
				44
				15.8
				39.3
				173.6
				35.5
				36.4
				11.2
				48.1
				157.4
				176.2
				23.6
				217.9
				45.5
				42.6
				9.4
				5.8
				215.1
				9
				12.6
				9.1
				125.2
				110.8
				33.2
				180.4
				299.2
				89.3
				82.2
				83.3
				55.1
				74.5
				73.5
				131.8
				428
				133.2
				31
				6.5
				202.8
				28.1
				11.9
				50.5
				58.5
				27.2
				99.8
				53.7
				145.4
				33.7
				50.9
				6.9
				6.1
				159.1
				26.1
				10.6
				172
				142.6
				70.1
				101.1
				38.4
				25
				156.9
				46.5
				460.3
				230
				50
				44.8
				195.1
				24.3
				64.6
				143.4
				91.9
				105.8
				47.2
				31.8
				35.1
				229.3
				19.5
				165.9
				21.7
				5.3
				120.3
				73
				92.5
				134.6
				25.2
				96.4
				398.9
				7
				18.9
				10
				38.7
				421.8
				53
				117.2
				120.1
				21.4
				9.2
				29.8
				145.1
				13.5
				90.6
				42.1
				131.4
				74.8
				42.2
				303
				37.7
				7.2
				16.2
				127.1
				66.3
				17.6
				227.3
				38.7
				293.4
				197.6
				29.7
				259.9
				120
				17.9
				48.2
				23.4
				235.7
				17.6
				16
				181.5
				213.3
				55.9
				45.7
				7.8
				43.4
				111.2
				53.1
				23.7
				127.4
				103.4
				227
				32.2
				141.7
				24.2
				58.8
				122.4
				63.9
				41.5
				105.3
				27.6
				156.8
				50.4
				33.2
				119.7
				71.5
				5.5
				5.9
				2.9
				51.6
				57.3
				156.6
				98
				190.4
				41.8
				149.5
				19.7
				49
				27.8
				20.3
				179.8
				74.3
				188.4
				170.2
				48.5
				236.3
				111
				230.9
				27.8
				301.6
				94.5
				137.2
				175.8
				144.6
				80.8
				122.7
				26.3
				33.2
				21.7
				4.8
				59.4
				76.1
				28.7
				74.1
				96.1
				42.8
				169
				163.7
				113.5
				44.1
				75.7
				160.3
				93.4
				8
				19.2
				37.5
				137.5
				58.9
				31.3
				241.1
				55.1
				30.9
				24.8
				82
				27.5
				170.8
				256.2
				42.4
				44.2
				188.4
				38.2
				8.7
				168.1
				130.2
				73.6
				63.9
				220.1
				90.4
				52.2
				156.8
				268.2
				171.3
				61.7
				19.8
				18.2
				203.4
				32.9
				91
				146.4
				143.9
				125.4
				49.8
				123.5
				104.8
				137
				31.2
				66.8
				120.4
				7.1
				166.1
				124.3
				229.1
				10.5
				218.5
				22.4
				137.6
				119.2
				11.9
				152.7
				72.2
				58.7
				128.2
				45.9
				17.5
				29.4
				24.3
				143.9
				57.7
				189.1
				66.2
				41
				54.5
				69.7
				67
				7.9
				230.3
				70.2
				147.5
				184.7
				17.4
				64.9
				36.3
				179.5
				218
				37.7
				249.3
				31.5
				5.7
				5.5
				10.5
				208.8
				107.8
				72.2
				171.8
				307.3
				350.7
				213.8
				42.1
				218.6
				48.1
				6.4
				6
				15.6
				118
				58.1
				60.9
				127.3
				346
				160.6
				13.3
				66
				119.8
				90.6
				177.1
				36.5
				137.4
				85.2
				39.9
				78.3
				94.4
				150
				141.9
				18.9
				176.8
				90.9
				196.7
				424.8
				34.1
				19.9
				62.3
				146.5
				58.4
				112.5
				82.5
				137.2
				63.8
				24.3
				19.5
				5.5
				89.6
				66.9
				87.3
				135.7
				87.9
				85.7
				6.3
				139.8
				85.8
				36.6
				96.5
				66.8
				11.9
				41
				120.3
				60.4
				24.1
				22.7
				204.9
				28.9
				15.1
				97.2
				115.5
				24.7
				39.1
				98.5
				50.9
				20.8
				164.5
				58.3
				134.6
				60.7
				274.8
				37.6
				61.6
				87.1
				142.5
				53.1
				94.6
				21.4
				6.9
				7.9
				14.3
				147.9
				49.8
				46.2
				181.5
				187.3
				123.7
				16.2
				201
				59.8
				147.5
				26.5
				195.5
				56.5
				6.1
				11.7
				44.6
				156
				10.8
				48
				136.6
				246.3
				84
				59.4
				167.2
				29.2
				12.3
				52.4
				141.8
				31.4
				41.2
				5.4
				37.8
				82.9
				142.9
				102.2
				68.3
				294.5
				156
				44.1
				15.6
				39.5
				173.6
				35.5
				36.3
				11.7
				47.9
				157.2
				176.5
				23.6
				217.6
				45.5
				41.5
				10.5
				5.7
				215.3
				9.1
				12.7
				9
				125.3
				110.7
				33.1
				180.5
				299.3
				89.2
				82
				83.6
				55.5
				74
				45.5
				32.4
				127.6
				109.2
				318.6
				133.3
				31
				6.2
				203
				28.2
				11.7
				50.3
				58.1
				27.8
				100.1
				53.6
				145.4
				33.7
				50.7
				7
				6.1
				159
				26.4
				10.4
				120.8
				51.4
				142.1
				70
				101.3
				38.6
				24.8
				156.9
				46.5
				460.5
				229.9
				49.9
				44.9
				195.1
				23.7
				65
				69.6
				74.1
				91.8
				105.9
				47.2
				32.1
				34.7
				229.1
				19.8
				165.8
				21.6
				5.4
				120
				42.8
				31.1
				91.5
				134.9
				25.3
				30.1
				66.5
				398.6
				7.2
				18.8
				9.7
				37.7
				358.1
				65.2
				53
				237
				20.6
				10.1
				29.4
				145.4
				13.6
				8.3
				81.6
				42.7
				131.3
				74.5
				42.7
				219.5
				83.4
				37.9
				7.2
				16.1
				126.5
				66.8
				17.4
				227.5
				38.7
				293.4
				197.6
				29.7
				80.1
				179.7
				120
				65.8
				20.2
				239.4
